# Supplementary material for: Deep learning of the regulatory grammar of yeast 5′ untranslated regions from 500,000 random sequences
Source: HighWire-hosted journal article supplement (doi:10.1101/gr.224964.117), 2017-11-02
Supplement: Supplemental_Fig_S5.pdf [file Supplemental_Fig_S5.pdf]

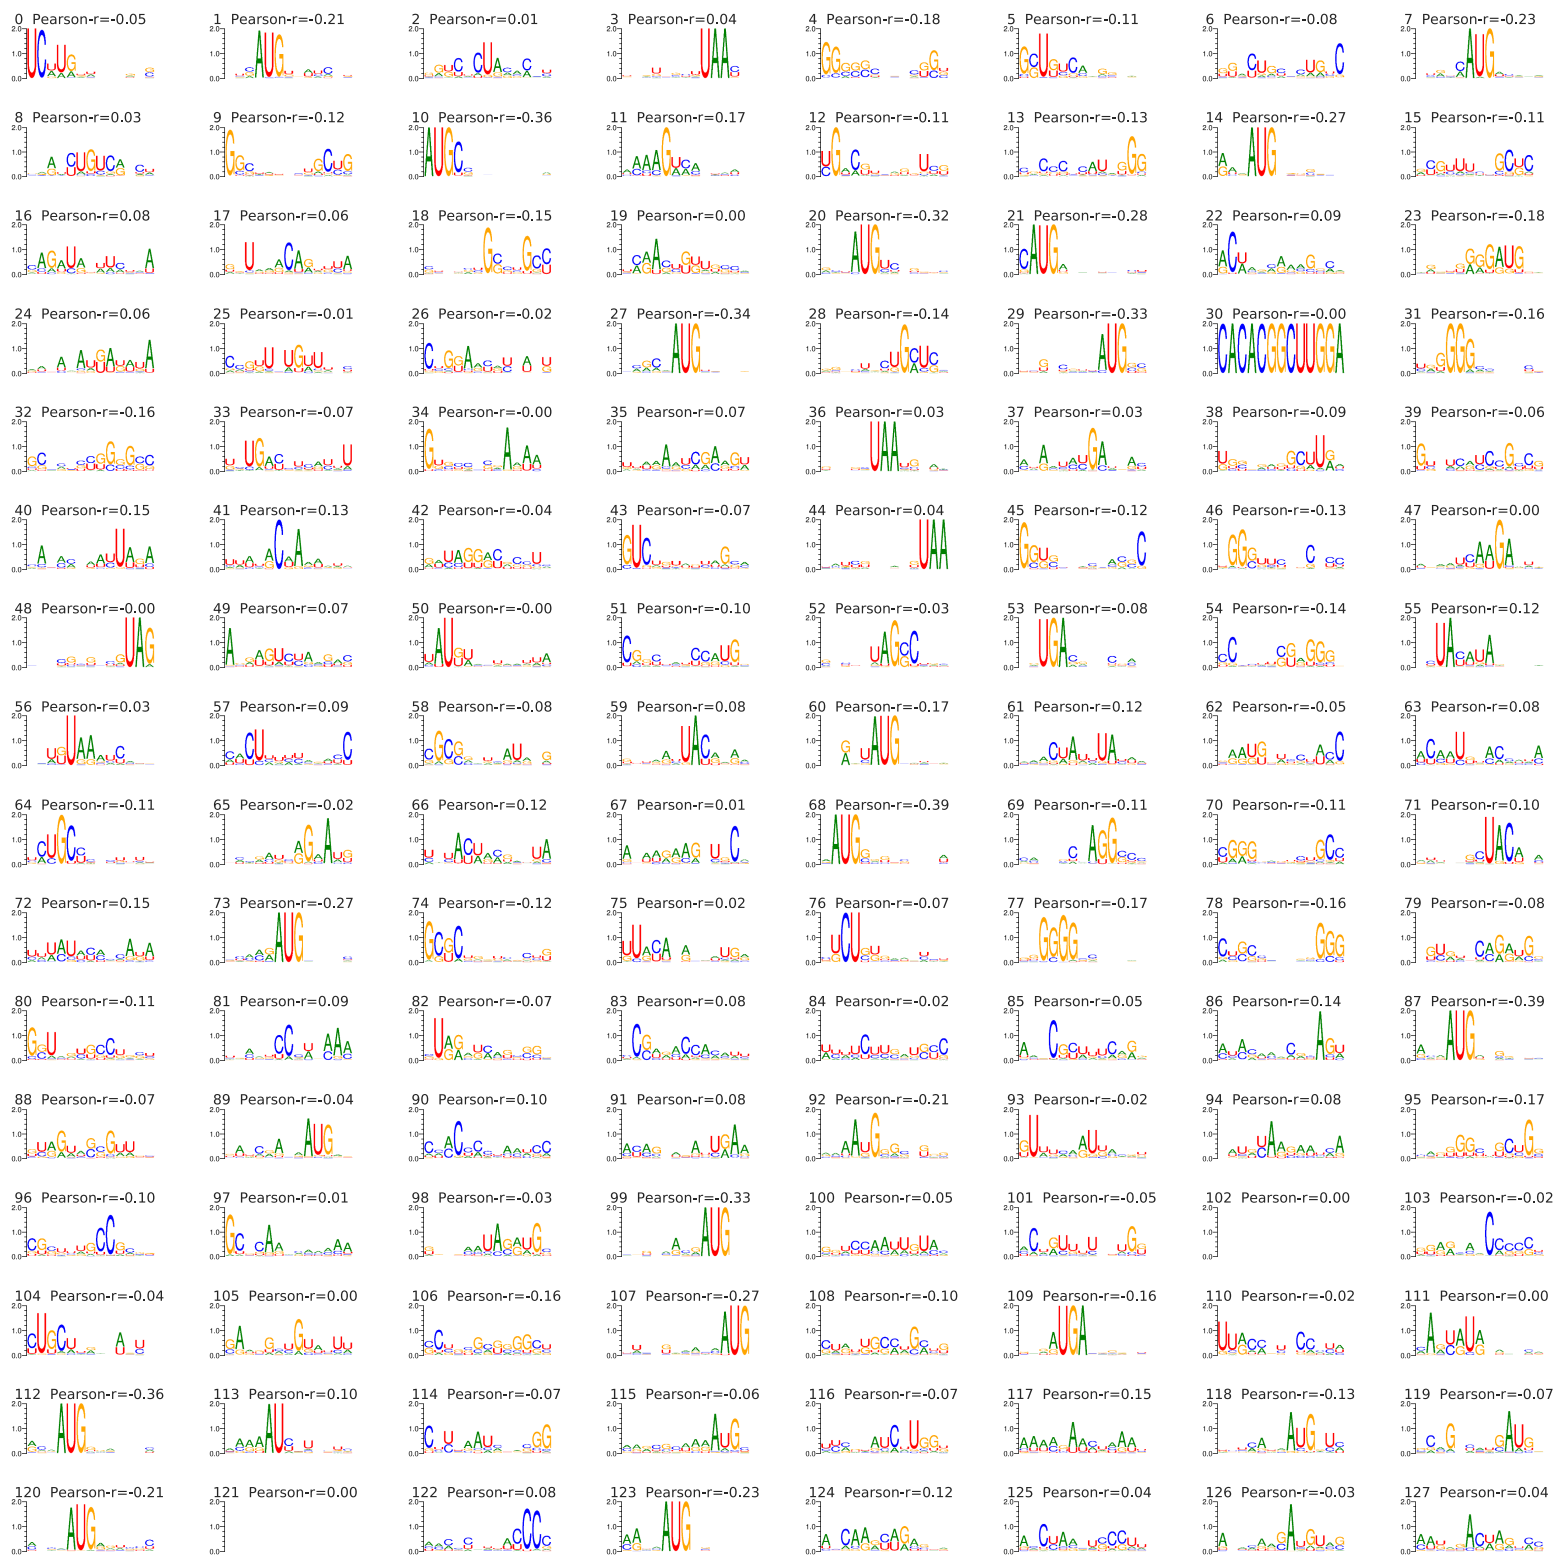

Supplemental Figure 5. All first layer filters from the CNN represented as positional weight matrices (PWM). 488,000 random 13-mer sequences were tested in each filter. The top 1000 were used to create a PWM. Each filter's per-UTR motif score was compared to the enrichment score of that UTR, resulting in a positive or negative Pearson correlation, suggesting that the presence of that filter-motif has a positive or negative effect on enrichment.
