# Supplementary material for: Deep learning of the regulatory grammar of yeast 5′ untranslated regions from 500,000 random sequences
Source: HighWire-hosted journal article supplement (doi:10.1101/gr.224964.117), 2017-11-02
Supplement: Supplemental_Table_S1.xlsx [file Supplemental_Table_S1.xlsx]

## Sheet: Supplemental_Table_1_Random_Lib
Supplemental Table 1. Growth rates of all random UTR sequences.
Random UTR sequence	Log2 growth rate	Input reads	Selection reads
AAAAAAAAAACATAATAACGATGATCAGTTAAAATCATAGTCTAAGCCAT	-1.23707	14	3
AAAAAAAAAAGACTACAACAGATTGTAGTGGCGGACCAGTGTGCCTTACA	1.28866	14	49
AAAAAAAAAATATGGGGCCCTGTTCCAAAGATACCTCAATTTCATAATAA	-0.608457	13	6
AAAAAAAAAATCTCTGGCCCGATTATACTGGAGCTAATGTAAAATTTGTT	-1.09396	12	3
AAAAAAAAACATAAATATGAAGGCCTGACATTATAAATAACTTACCTATG	-0.0488408	7	6
AAAAAAAAACGAAATCAAACAAGAGAAAAACTGCATAGTTCACTTATTGC	0.82229	10	22
AAAAAAAAACGAATGAACGAGTAACAAAGGACCCCTAATAACTCGAGGGT	-1.01392	2	0
AAAAAAAAACGGCAAACATAAGTAAGCGCTAAAACCTTTTATTGAATGTA	-0.104551	28	23
AAAAAAAAACGTTGCTATTATACCGAAGTCGCCCTAAAGCGTCCCTTCAA	0.994061	57	143
AAAAAAAAACTAATTCTGGAGCGACAAGTTTATACCCCATATTTTCGTTT	-0.11376	49	40
AAAAAAAAACTCTGGTCGATCGAAGCTTTTTACTCGTCAACCACAACATG	1.47098	27	111
AAAAAAAAACTTGCATCCTACTGGAGGGTTAGGTACTAGACTTCTGGGTA	0.185787	46	51
AAAAAAAAATACGATGTGCCATACTAGATCGAAATTTGAACATGGAGCCC	-1.20629	39	10
AAAAAAAAATATTTTCACTTTACTCGAGGACAATTATTCAACTGCCGAAT	1.293	22	76
AAAAAAAAATCGTGCTGCCCAGATCTAGAGCAGTCCCTGTTGCCATATGC	-3.09336	23	0
AAAAAAAACACAGTCCAGTCGAACACCATTCATCTAGGCGTTCATCCAAG	1.46083	98	391
AAAAAAAACATACAATTCCTAGAAGTCAAGAGATGGAGTTATAGCCTAGT	-1.86122	55	7
AAAAAAAACGACATAACGGTTCAGGCGAAGACAAATCATTACCGCACCGA	0.0258501	69	65
AAAAAAAACGGGCGAGCCCGAGGAAGCGGCTTTTAATGAATATCTCGATA	0.971994	13	33
AAAAAAAACGTAGATCGACCATGCTTTATCGTGCGGCTCTGAAATTAATG	-0.0808238	58	49
AAAAAAAACGTGCCGGTATTTGACCGTACGGGACCCTTGCAGCTGTCAGT	-1.19624	17	4
AAAAAAAACTAGCCGGAAGAGGCCTATCAGGTTCAGAGCACCGCCAATAC	-0.266707	26	18
AAAAAAAACTAGCCGTGATATTTTTTGTCGTCCGTGCGCCGTTGGGATCA	0.235513	42	49
AAAAAAAACTCACAAATTAATCGTTCATTACGACGTTTCCCGCATGCGCC	-0.183573	67	51
AAAAAAAACTCAGTTCGTTGTACGAGTTTTCTCTTCGAAGCGCTCAAATA	0.699876	19	36
AAAAAAAACTGCACCTGGTTTTCAATCCTCCCGGATCTGTCAACGACGGA	-0.0153929	20	18
AAAAAAAACTGCGCCTGGACTGACAAAAAGTTGCAACGCTGTCCCATGAA	-0.187954	87	66
AAAAAAAAGACGTAAAAGGTTTTTGACCTACACGATGAGTCTGGACCCCA	-0.513146	19	10
AAAAAAAAGATAACAGATAAGACGACTATTATCAAATTGACTTTAATAGA	1.448	21	85
AAAAAAAAGATCCGCCACGCACCGATTACCGGATAAACAAGCTTATGGCG	1.43276	19	76
AAAAAAAAGATCTCCCACGATCCCTCAAACTCATACTGTAGCACCACGTT	0.184063	66	73
AAAAAAAAGATTCCTTCACAGGCCAAACACTATATAGTAGATATGCTAAA	-0.719682	37	16
AAAAAAAAGCAAACAATGCGGACCCGAACGGCATGCCAGAATGTAGTATG	-1.58929	31	5
AAAAAAAAGCACGCGTATATCTGCACCGCTAATTTGTCCTCCCCTAGCTT	0.554694	14	23
AAAAAAAAGCATAAGTCCCCAGAGTACTTGTTGGAATACCGTATTCTCTT	0.321079	29	37
AAAAAAAAGCCGAATCGACAAATGACGTAACAGAACAAATTCGTACCCTC	-0.844845	37	14
AAAAAAAAGCGTGAAATCGTTAGGGCGCCGCTCCGAACAGAAAGGTGGCA	-0.0488408	7	6
AAAAAAAAGGACAGTGTCGATACCGTTTTCACCCAGTCAAGACACACACG	1.65157	71	344
AAAAAAAAGGGCTATGCATCAGCTGATGGTCGAAATTTCCTACTACGCAG	-0.285683	41	28
AAAAAAAAGTAGCCCCCTGAGCTTAAGCGGAGGGAATCTTGTCTATGAGC	0.0631844	46	45
AAAAAAAAGTCCCGAGCTGGTATAATTCATGCCCTTTACCGTAAGCGACT	-0.985751	34	11
AAAAAAAATAGGGATCAGACATGAATGTTTATATCAGACCATCGAGCAAG	1.43462	6	26
AAAAAAAATCCGAACAAGTAACCGGATGGCGTTAGGTCCCGGGATAAAAT	-1.45575	27	5
AAAAAAAATCGACACTCGCTATACACAATGGAAGTAACCATGTACTATGT	-1.07846	31	9
AAAAAAAATGAAGGACCTGACTTCTTCGCTACTGCTATGTGTGCTTGCGA	-0.608457	1	0
AAAAAAAATGACCGATGTAAAGTGAGCCATTTACTTTTCGGTGATTCGTT	-1.39691	87	19
AAAAAAAATGGCAGCGTTCCGTGCACCCAAGAGTGCGTAAGGGTACCTAA	-1.44679	36	7
AAAAAAAATTTAAGCCATATCGGCCCCACTGGCTACTTCCCCACCCCAAC	0.759819	27	54
AAAAAAAATTTCTCGCAAATCTATACAATACCGCAAATCCCCAGTGCAAG	1.34693	29	105
AAAAAAACAAACCCACATATGCTTACTTAACCTTTGTATTTTACCCTTAC	-2.18399	28	2
AAAAAAACAACTGGAGCTACATGCGCGTGCACCGATCCTCATAGCCCTGA	-1.60699	37	6
AAAAAAACAAGAAGCAGTACGGCATCGAACTATTATGTTCTTACAGAATC	-1.54001	65	12
AAAAAAACAATCACCACACAGTATTGTAACCCACGTGTCTATAATAGACA	0.166369	93	101
AAAAAAACACCATACTAATCCTATACGCACATGGGTAACTGAAAATCCTC	-1.95219	22	2
AAAAAAACAGAGAACTAACTCGTTGCGCCTATCCGAAACGCTCCGCGTAC	-0.181013	29	22
AAAAAAACCAAACTATCTCCAAGTTTTTAAGGAATCTTCTAGCGGGACAC	-0.608457	5	2
AAAAAAACCAGTTTGGCCCGGGACCATATCGCGCGAACACGCCAATTGTT	0.294411	89	110
AAAAAAACCCGTTCCCCACGCTATCTAGACGGGTGCGACGTTAAGAATTA	0.279999	50	61
AAAAAAACCCTGCCCGGAACTTCGGCAGTACTACATTCCAACACAAAAAC	0.119782	27	28
AAAAAAACCGCACTATCAGACATTATAACGAACTCTCAATGGCATGAAAG	-1.26238	49	12
AAAAAAACCGGAGGCGTAAGTGCCAGAAAGTTGCTACAAGTGTGCCAGGG	0.579387	49	81
AAAAAAACGACTTTGTCTCACATTAGAAAGGCACGACGAACCGATCCCCT	0.853345	50	109
AAAAAAACGCGTGAAGAACTACCCCTAGGTATATAGTAACCGCCCCCAAC	0.209854	44	50
AAAAAAACGGAAAACCCTCGGAACCAGCCGTAATACGCTAAGTCAAAAAT	-0.181938	46	35
AAAAAAACGTGCGCGGGCTGGGAATACTCCGTAAACACTAACTCTAGTCC	-0.405932	48	29
AAAAAAACTAACAGGGACCTCTTGGCAAACACTTACCTAAGTATAACATC	-2.44104	24	1
AAAAAAACTAGCAACACTAGGACACACGTCAAGCGGGCCCGCGTGTGTCA	-0.870821	51	19
AAAAAAACTCAACCCTCACCCTCCAGCTAGTAGAACCGCGGGCATGTGCA	-0.658887	60	28
AAAAAAACTCACACGATGCGCAATCACCTACACTTACACAATCTCACGCC	-2.74852	16	0
AAAAAAACTCCAATGGGGTGCGCCGTGCTATTGGCTAAGGACGTACGACC	-0.965132	19	6
AAAAAAACTGGTGATCTACTGAGAATCCCGAGGCGAAAATTATTTCTAAG	1.44993	11	46
AAAAAAACTTTAAGACCGTGAATACGAAACACTCTGGTTTCGTTGCGTAC	-2.518	26	1
AAAAAAACTTTCAGTTCTTCCGATCCGTCTCCATCAAGTATACCCGTTAT	1.06889	36	98
AAAAAAACTTTTACAGAACAGTTTCGACTAATTACCCTGTACCTTACCAA	0.664509	41	74
AAAAAAAGAAGCCTCGAGGTTATGCCCGACTCTGCTGAGGCTCGGAACGA	-1.95219	68	8
AAAAAAAGACGGCGTCAGTTCACAGCCCGCTACAAACATTATCCCATGGC	-1.3016	23	5
AAAAAAAGACTGCCGGAACAGCTCGAGGGAGGTGCATAGTACTGGGAAAA	0.777838	12	25
AAAAAAAGAGCCTAAGCATTTACCGCGGGGACCCACTTTACCGAGCCTAG	-0.713817	39	17
AAAAAAAGCAACAACCGTCCGCAACCCCTGCAAGGCATGCTTATTGTGGC	-0.097631	5	4
AAAAAAAGCCGGGCGATAATCAACCCGGGTACCTAGACTGGAGCTGCATA	-0.202991	63	47
AAAAAAAGCTACGTAAAAGCATCGCTTTGTGCTGCGCCCCTAGCACCGAT	0.79764	49	101
AAAAAAAGGAAACGACTTGAAGCCTTAGGACTCAGACGAATGAGTTTCCA	0.9176	9	22
AAAAAAAGGACTGGCTGGAGTGCCACAACGTTACGGAGTGGTAGCCTCAG	-0.186184	58	44
AAAAAAAGGAGAGCTAACTTGTGAGACAATTGTGATGAAAGAGCGGTGCA	1.00098	3	9
AAAAAAAGGAGTGACAACGCCAGTTTATAACTAAGGGTGTTCACGGTTAC	0.798247	96	197
AAAAAAAGGCACGGTAGTCTGAGTTATCGGAGGGCCCGGATTGTTATGTT	-2.3132	10	0
AAAAAAAGGCGAGGGACGGCGCTGAAAGGAAGACCCACTAACAAACTAAA	0.390072	41	56
AAAAAAAGGCTCGATGGATCGGGCCCCCTTACATATTATCCGTACCAACG	-2.11253	8	0
AAAAAAAGTACGATTGCCGCTACGCCCTTTATACACTTAATAGTATGTTA	1.35766	20	74
AAAAAAAGTATGTTGAAGGATTGACCGATACAACGCCGCAGATGTTCTAT	0.256541	15	18
AAAAAAAGTCACATACTAGCTTTTTAAGAGGACATTTTAACCCCTATTTC	0.770771	70	140
AAAAAAAGTCTTTGCAATCGCGCATCCCACCCTTATACAATTGTGCCAAG	-0.0206699	19	17
AAAAAAAGTTCGGCTCTGCAAGAGGACATTCTTGTTGACCCTAAACCAAG	0.841554	37	80
AAAAAAATAAAAACCATAATTGTCAGAGACGTGCATATATTCCGTCCCCT	0.256541	47	56
AAAAAAATAACGGTCGCCCACGCCTATGAATTTGATGCCGGACGAGTCCC	-1.25904	45	11
AAAAAAATACGCTGATACAGCTGATTAAACTAACAGCGTCAATAATTGAG	1.54621	15	68
AAAAAAATAGAGACAACCTATTCACAGGATCAAATAGTTTCTGTTTTACC	0.984174	23	58
AAAAAAATAGCCGCGCAGTTTAACCGGAAGGGGAGAAAATCCACGAATAT	-2.3132	10	0
AAAAAAATATGGAATAGCGGTATTATCTGAAAAGCGGCAAGGTTATACAT	1.2107	11	36
AAAAAAATCAATAACCATGCCTCGTCGAACCAATTCGGCCCCTTTCTTTG	-0.0796125	32	27
AAAAAAATCAATCTAGAAGCCCTTAGAAATTGTTAACTAAGTTTGATGAA	0.620209	23	40
AAAAAAATCATTAATCTCCCCTACCGGAGCTCTTCACCCATCTTAAATTG	-0.228967	25	18
AAAAAAATCCGCTAACCATTGAGAAAATTGTTGGACATCAATCGTACACG	0.99076	58	145
AAAAAAATCCGGAAAGTCATGTCGTCACCTACGAGTGGTTTTTCGAGATA	-1.1317	26	7
AAAAAAATCTACAAATAACGTTATCCAAGCTTCGATACACGTGGATACCA	1.46157	79	316
AAAAAAATGAAAAAAGTAAAACCCGGCGCCCTGGATCACGCATTCTTTTA	-0.536998	53	28
AAAAAAATGTTTCAGCGCGAATTTGGATGATTACATCATAAGATCTTTGG	-1.3193	56	13
AAAAAAATTATATTGAGCCCGTGGGTTGTATACGTAGCGACAAGCCGTAA	0.854211	62	135
AAAAAAATTCCAGCCAACGATCTGTTATCTCACGTGACACTAAACATTCT	0.907891	17	40
AAAAAAATTGTGAACTGAGAACAGTTGGCGCCCTCTGATTACACGCAACG	0.490156	27	41
AAAAAAATTTACCGCGGCAATTAACGTCAATGGCGCCCACCTGCACCAAA	-0.608457	1	0
AAAAAACAAAAAAGGGATTCAACTCGTTCAGCTTCAACCCGATGATTCCG	1.09922	61	170
AAAAAACAAAATTGATACCATCGTGTCAATTAGTAAATTAGTTAGGTACC	0.851946	38	83
AAAAAACAAACTCAGACATCCCAACCTGACAGACTGCCGAACTTTCTATG	0.372373	59	79
AAAAAACAAAGTCCTAATGGCCCGTATAGAGCACTACATGTGAGTGAATC	-1.57354	41	7
AAAAAACAACCGCTTTGCGCGCATATCAGAAGGCAGGGAGGTGTAGACTT	1.11681	56	159
AAAAAACAACGAGATTGGTTCGTGAGAGAAGATCAGTTCGACCACAATGT	-3.02882	44	1
AAAAAACAATGTGAAGTGACTTTAATCTTGGAATAGCCAGCCATGCGGGA	-3.00635	21	0
AAAAAACAATTAAGGGTGGGTAACCACGTTCATCCCCTTGCCTAGTGAGT	-0.125874	78	63
AAAAAACACAAGTACATCAAGGCGACCGAATTTACTTTTTACCCGGCCAA	1.50735	26	111
AAAAAACACACAAACGGGAAATGCATACGTGCCCAGGAATCTCAGTATCA	0.0846906	16	16
AAAAAACACATCGCGCGCCCAACAGGGTGGAGCCGTCGCCAAATCACGAA	-0.961278	73	25
AAAAAACACCCGCCAGTGAAAGATTCGCACCGTCGTCCCAGATTGCTTGA	0.696869	44	82
AAAAAACACCGTTTTAGCTTTAGTTAGCATTCAGAGCAAATACGGCTTAC	-1.62703	71	12
AAAAAACACGACAAGTGGGCACACAAAGAGATTGGACGTGCACATAAGAT	-0.608457	1	0
AAAAAACACGTGACCACTAAGCTATCGGCCAAACGTCGCCTACAATGCGA	1.63529	20	98
AAAAAACAGCGTGGTTCCCCAGAAGTGACCAGACGTTGGGGTCCCGGACC	-1.39122	104	23
AAAAAACAGGCTCGAATACGAACTCCGCCGAATCGCACCTCTTGAGCTTG	-0.285683	41	28
AAAAAACAGTCTGGAAACTGATCTGGATCTAAAAGGCTCGCATAATTTCG	0.024066	67	63
AAAAAACATAACAAGAGTGGTTCTCGCGTCGCGAAACTCTCGTCGACTTC	-0.916758	97	35
AAAAAACATATTCCGAGGGGTGACCTTCACGAAGGGACGGAGGCCAAGCA	-1.07846	63	19
AAAAAACATGCTACCGAATACTTGCTCGTTTTGGCATTGGAATGTCAACG	-0.251782	27	19
AAAAAACATGGCCTAACCCGGCATTTATGCCACCTAGTCGACGCTCCAGC	0.190051	26	29
AAAAAACATGTGTATTCGATGTTAATCCGCACCTGCCAACATGTAACCCA	-2.59633	72	4
AAAAAACATTATCAAAATCCAGGGGTCGCTCATCAGCTAGGTCGATTGCC	0.0179992	61	57
AAAAAACATTCTCCAACCTTGGAATGGATCAAGTCCGGCCTCGGCAGACC	-1.01392	2	0
AAAAAACATTTTTTAGCGCTACTGTTACCCGCTTCAAGATTCCGCTTAGC	0.888186	29	66
AAAAAACCAACCATGCGCATTAAGGATTCTTGCGATAAGCGCCATGAGAA	-1.11055	75	22
AAAAAACCAAGGTTTTGAGGTGGCCGACGCTTCCTATGCCCAACACCGAA	-1.62006	21	3
AAAAAACCAATCGGATCTCTGGGTGTCTTTCCCGTTTGTAGGTGGAAATA	-0.166624	17	13
AAAAAACCACAATTTGCTACCTATATCCAACACCGTAGTGCGACTAATAG	0.953042	46	111
AAAAAACCACCCCTGCCAACGCATTCAATGCGGCGGCGCTCACCGAATCG	-1.3016	39	9
AAAAAACCACGACGACTGCACCGCAGTATCATATGACTGGCAGGAATAGA	0.516131	75	116
AAAAAACCCCAAGGCCCAAGCAACCCAGACCTCATAGCAAATTTTGCCAA	1.37051	33	122
AAAAAACCCCAATTACGAAAATGTTGTAATAGAACTACATATAAACAGCG	-0.65975	39	18
AAAAAACCCCATGCAGTGTTCGACTATACTGGAAGAGCCGAAGTTACTCA	-0.744589	54	23
AAAAAACCCGCCTCGACACTCAGATCGGGGACGCGCAGCAGTCCACATAG	-0.138453	44	35
AAAAAACCCGGTGCCTCCTTTACGGCCTATCTATATGCCCATCCTTGTTC	-1.13908	16	4
AAAAAACCCTATCCGGAATACAGTCTAAACATGCTACGTTCCAAGAAAAT	-2.33568	44	3
AAAAAACCGCAAACCGCCGCAATTCGAACCCTATGCAGCCTGCCCTAAGA	1.1833	9	29
AAAAAACCGGACCGGCCTTCCATACTAAGTTTGCCGCGATCCCCACGCAG	0.134288	58	61
AAAAAACCGTACACGACATAGACACTCTCCCGGTACGCAGAGGAACAGAC	0.732886	90	173
AAAAAACCGTCAGCGTCGGGGCCAACCATAAAAGTACTAAGTCTGTCGAC	-0.278215	22	15
AAAAAACCTACATTGAAAACGCAACCGACGAAGGGCGGTCAGACATTGGG	0.321079	44	56
AAAAAACCTCATCCCTAAAGTTCGAGAGTTAATCCCACAGGCGCCCGGAT	1.30847	14	50
AAAAAACCTCCACCCAGCGCCGTACAATTGGGCCTATAGATGTTGGTTTT	-1.2275	25	6
AAAAAACGAAACAGAGGAGCTTGTGACTCTTTGGTGTATACCTATAAGTC	0.791261	73	149
AAAAAACGAAATTACTCCTCAACACTTTTCCCGGCTCATATCCCCCTGCG	1.11431	19	55
AAAAAACGAATCCATTAGCTAGGTTATCTAGAAGATTTACACCACTTTCA	1.93529	10	69
AAAAAACGACGAAAAGGTACCCCCTCACTGGTATAACATGCAAACACTTT	-1.66451	45	7
AAAAAACGACTAAACGCAGAAAGTCGTCACTGACACGTGCGCTCCGACCG	1.21692	38	120
AAAAAACGAGAGAGAATGTTAAAATTTCTGTTCCCGACTGGTGTGCTAGT	-1.08351	118	36
AAAAAACGAGGCTTCGCAAAGGGGTTACCCTGACAGGAACACTTGTGTCC	-1.09396	12	3
AAAAAACGATAAGGGTCCAAGAATAGAACCACGTATAGGTTGGAGAGAAA	0.345417	46	60
AAAAAACGATCAATGGCGTCGCCTGATATGTTATATATGATATCATAACC	-1.74344	55	8
AAAAAACGATCCGAAACAAATCAATAAACCCTTTGAAGTCCCTAACACTC	1.12804	61	175
AAAAAACGCAACAAATTAATGACCCCTCGCGGCCGCATCATCGAGCCTCG	-0.266707	53	37
AAAAAACGCCGAGACTACTTGCAATGCGGTCCTTTAACGAGACCCCAGTG	-1.01392	14	4
AAAAAACGCCGTCCACATGCGCTCTCCAGTGGACGTCCAATTCGATTAAG	-1.68602	46	7
AAAAAACGCCTTATACACCGTAATGAACATTCGCTGAACGAAAGCCGAAA	-1.3529	79	18
AAAAAACGCCTTTTAAAGTGTTTTATCACCTCCCCACGCACTATTTGAAT	0.490156	19	29
AAAAAACGCGCTCGCGCTCGCCGTGTAACCCTAGTCGAGGCGATTACAGA	0.667296	42	76
AAAAAACGCTAAGTGGGAGTCAGCAGCGCATTTTGTACAATTAGTATATC	1.26009	70	229
AAAAAACGCTGCATCCTTCTGATTTACAATGGAACCGCCATCAGTAGCGG	-1.93021	14	1
AAAAAACGGATAACGACGCGCATCCCAAACCGTCCCTGCCGACGCTGGAG	-0.121646	58	47
AAAAAACGGTGCGCTTCTGCTAATTTCAATTTTGCTACCTAGCGGACCGT	0.931988	68	160
AAAAAACGTCTGTTGGAGAGGCCGAGTCCGGGTAGTGCAACCACACACGT	-0.0179636	40	36
AAAAAACGTGATTGAGAGGATCACAGACCCTAGGGCCACGTCCCTAGTGA	-1.56047	56	10
AAAAAACGTTGATACCAAAGAGTATTCAAGACGGTTTCTTAAATTTAATA	1.12614	23	67
AAAAAACGTTTGGCGGCACTTGATAGTTAAAGAGGATTATCCCAATGGCA	-0.608457	5	2
AAAAAACTAAAAGCCTATTTGGAGTCCAGGAAGAGTGAGCGTGATCGAAT	0.83997	38	82
AAAAAACTAACCACTTACGTCGTCTCGCCATTGTACCAGTCCCGCCTTAT	1.03885	56	147
AAAAAACTAAGGAATGTGTGTCTTGAGCACACATACTTAAACAAGAAAAA	-1.26078	95	24
AAAAAACTAGGATCCCGTATATGGACCTCCTCGACAGATCCGATACATCC	0.30338	44	55
AAAAAACTATACCCCCGGTCGAAGGACGCGCACTCTGACCCCGGCCCTAA	0.931988	5	13
AAAAAACTCAAGCCTTTAAATTATTGCAAAACGCTAGGGCGCGTCGCCCC	-0.097631	5	4
AAAAAACTCCGCTCTCATATAACGCCGTCATGACCATGTCCGTAGAAAAA	-0.608457	1	0
AAAAAACTCTCAGACTGTGGATACCGTCATGGGGGGTGTAGGCTGCTCGA	-1.54455	101	19
AAAAAACTCTGACATCGCAATAATCGAAATAATTTAAAACTTGAGCGCTG	0.96276	31	76
AAAAAACTGATGGTATTCGCCCAAACTCCAACCTCAAAGTTTAAGTAGGA	0.570198	23	38
AAAAAACTGCACAAGGAATTTTCGCGCAGGATGCCCGTTCAATCGCCAAT	-0.780307	18	7
AAAAAACTGTTGTTAAGACCCTTCAGGACTACTCGTGGTCTTAAATTTCG	0.119782	55	57
AAAAAACTTACGATATCTCGCATGTAAACGGGCAACGTCAGGTTCAGACT	-1.26524	53	13
AAAAAACTTACGTGTGGCATTGTACTAGGTGATTCGCCACTTAATCTTAA	0.688226	34	63
AAAAAACTTCACTCAGAAAGACACCGTATGGTACGATCAAGCGCCAGGCC	-3.13419	24	0
AAAAAACTTGCCATCGAAAAATGACCGGTTAAAGGAAGACATTGCATCAC	-1.73986	30	4
AAAAAACTTTGTTACAACCGTGCCCCGGGGCGTATACTACAGATTCTCAG	1.3869	30	113
AAAAAAGAATAAAGTGCCATTTTAAGTTAATCTAGATGACACTCATAGAT	1.019	54	139
AAAAAAGAATTAATCCCAATGGAATGTGGACCAGTTGGCGCTTGACCATT	-1.3263	81	19
AAAAAAGACAAAGTACTTTCTCCTATGAACATGCGGATTTTTTGGCTTCA	-1.28836	74	18
AAAAAAGACAACATCAATAAAGTACAATCCGGTCCCTGAATGTCCATGCA	-0.357142	55	35
AAAAAAGACACGGGCGACGCACAAAACCCCGTGTGTTCGGAAAATCGATC	-2.11253	26	2
AAAAAAGACCAACGATACACGTTGCCGCCAATTCCTTCGCGGGCTGAGAA	-0.105663	74	61
AAAAAAGACCCCTATTGGCGTTAAACCGAGAATGCCATTCTAAAACCGGC	-2.04056	66	7
AAAAAAGACCCTAGAAATTTTACGGACGGTTAGTGGTTAACCTTGGCGGG	1.41383	44	169
AAAAAAGACTCCCCGAAGAGAGGCGTGCAGCCAGCTCTTGATAACAATGA	-1.63808	27	4
AAAAAAGAGAATTACATAACGTTACATACCAAAAATTAAGGCCTCAGATT	1.11161	52	147
AAAAAAGAGATTATCAATTATAAACTGTACCAAAAAGAGTAGAATATTGC	0.513686	27	42
AAAAAAGAGTTCATGGTCCGACAGTGGTGTCTACTCAAATCCGAACCACT	-0.0396071	76	67
AAAAAAGATAACATATTCTTACACACGTATTATCTTAACAAGATTACTAA	0.811739	28	59
AAAAAAGATACAAATTATCTTCCAAATGTTGAGTGACAACCAAGGTTGAA	-2.34306	33	2
AAAAAAGATATCGCCCGGCCATGCTGATTGCCCGTATTTTTTTGACATTA	-0.608457	35	17
AAAAAAGATATTAACCATCCAACCCTTCCCAGCTGCCAACATTGGTGCCT	1.40645	3	14
AAAAAAGATGGCCCTTCCAGGGCACTCGTACCGCGGTTTATTCTGCGGTA	-2.3132	21	1
AAAAAAGCAATCTTATACCCGATGTCGTTTGTCCAGCATCACTTTCTCAC	-0.0839321	57	48
AAAAAAGCAGCCGTGTACCGTTGGACGAAGCCCAGCCACACAGCCTAATC	1.53161	3	16
AAAAAAGCAGTAGGGTTAAAGATCTCCTGATTTTATGAAAATGTACCGAG	-1.36223	16	3
AAAAAAGCATGCACGATCGCCGACCACAAACCAGTCATACTCGAAGCCTC	0.151382	28	30
AAAAAAGCCGACGTTCACATATCGCTGACCACCCTTAGTGAATGCATCAA	-1.3016	7	1
AAAAAAGCCTCGAAGCTCGGCTGACATCTTGACCGAGTCGGATATCCTCT	-0.329285	58	38
AAAAAAGCGACAAAAGATCTGGTGCGATTAGGTACCCCCTCCAACAAACG	0.987558	14	36
AAAAAAGCGACTCCATCCTGGCCCCCGGCCGTCATTAATAATACGCGGTG	-0.693014	36	16
AAAAAAGCGCAACGCGTACTTGTATTGTATAAAATACCAACGATCGTATA	1.81308	18	106
AAAAAAGCGCCTGATACAATGCCCTTTGCTCGAGTGGCTGTACCGTTCAA	-1.78711	12	1
AAAAAAGCGCTATCGCGAAATAATGCAAGTGCGACAAAAGAGTCACCAGT	-2.09006	87	9
AAAAAAGCGCTCTTTGGCTCGTCGCGCATCGGACAAATTGCATCCATGTT	-1.56397	51	9
AAAAAAGCGCTGTCTAAGGACAAGCGAGCCGGTCTTCAAATTGTTAAGTC	-0.330253	52	34
AAAAAAGCGGACTGGTGTGAACCTACACATCACACTGAAGCCAGCTCACG	0.970522	79	193
AAAAAAGCGGGGCATGGTCACTCATCGTGGTCGGCTAAGGCGCGAATCCC	-2.01026	64	7
AAAAAAGCTAAACAGTGGGAATACCTCAAGTCCATCCTCATAACCTTGTG	0.859331	52	114
AAAAAAGCTATAAATTGAATACCAACTCATATATGTCAGAACACTTCCGG	0.838462	23	50
AAAAAAGCTCATTGATGCAGACGAGTGTGTCAGACCCGCTCAGAACCGCT	0.612963	124	211
AAAAAAGCTCCGTAAGCAGAGGGTGGTTCGGAGCAGGTGTTACAGATGGA	-1.58302	52	9
AAAAAAGCTGAACCAACATCCACAACTTGTCCATCACTTGCCGTTGCTAA	-0.516083	30	16
AAAAAAGCTGCACCAGCTTCGAACGCATAGTTACTTGACGCACGGCAGAA	0.0483229	27	26
AAAAAAGCTTGCCTAACGCGAATGTAAGAACCGGAGTACCGGGCCTGACA	-2.07479	25	2
AAAAAAGCTTTCGCTCAATTACCCAAACTCACCTAATGCATCCCTCCTAC	0.70373	55	103
AAAAAAGGAACATGTCCTTTATACTGTCATACATATAGTTTCACGTGGAT	0.00464788	38	35
AAAAAAGGAAGATGAAAAAAGATCGGTTCGGTAAAGAAAAAAAAGACGTA	0.796187	26	54
AAAAAAGGACCCAGACGACAGTAACGCATACTAAGGCGGAGCCAAATCCA	0.588348	83	138
AAAAAAGGACCTGTACCCAAGGCAACTCACGTGGCGAGAACATCTTAAAC	0.298265	41	51
AAAAAAGGAGAGTACTCTCTTTGTGCTCAACCTCGAAATGAGGTCGGCCG	-2.3056	130	11
AAAAAAGGCAGGACTGAGGTAATACTAGGGGGCATAAACTGGACGCAGTG	-0.802613	50	20
AAAAAAGGCCACACGCTCTCAAGACAGTCACCCCAGTAGACGCGTATCCC	0.183131	28	31
AAAAAAGGCCGGCCGAGGCTCAGAAGCCAGGGACGCCCCCCCTCAGAGAA	-1.70707	5	0
AAAAAAGGCCTTATTTCAACCTTGGGGGGCGTATAAAGTACTGACTACAG	0.712086	54	102
AAAAAAGGCGGAGCAAGTAGCTACTAACGAGCAAGTCAACAGGTCGCTAT	0.982632	54	134
AAAAAAGGGAAAGTAAAGCCAGCGTCTATGACAATCCGATTATAGGCCTC	-2.71867	32	1
AAAAAAGGGAGATTGGATATTCCGAAGGGGCGGTCACAGAGGATCCGAGG	-0.210109	93	69
AAAAAAGGTAGCGATGAACGTTGTTTCCGCAGGATGAATCGTGGCCAAAC	-1.52475	69	13
AAAAAAGGTGAAGCTGGTTGTCTCCGCAGATTCCGAGGAGTTTCACACCC	0.321691	85	108
AAAAAAGGTGACCATCTTGACATGACGACTCTCTTGGACGTCGATTAAGT	-0.728416	114	50
AAAAAAGTAACGGATGAAGTGGTGCCCGCACGCGGATTTTCTGGATATGA	-2.1666	18	1
AAAAAAGTAAGACTTTTACAATGGATCTGCGTGGGATATCGAGACTACCA	1.47098	36	147
AAAAAAGTAAGCCACGAACCGTGACCGCTTTCAAGTTTAAATGGATTGCC	-0.620578	82	40
AAAAAAGTAAGCGGATCGTCCTCGTGATAACAGGTCTCCCATGGGTGATC	-1.52475	44	8
AAAAAAGTCCATATCAGACTTATGGTAATGTATAACCCGCCCGGTCTAAT	-0.454306	59	34
AAAAAAGTCCTGAAATGTTAGTCGCATGAACGTCATATATGATTACATAA	-1.76114	18	2
AAAAAAGTCGACTTTCGGCACTCTTAACGCGGTGATTTACGCTGAAACCG	-1.52475	44	8
AAAAAAGTCTGTCGATCACCCGGCGCGTATATTTGAATTGCGGAGGGTCG	-0.11598	10	8
AAAAAAGTGACCAACGCTTCCTCCGCTAGAAGACATTGAGCGGTAAGTAA	-0.251782	48	34
AAAAAAGTGACCCCGAATACCGCGTAAATACGTGACCTGTCGTTGCCTAC	-0.521445	10	5
AAAAAAGTGACCGCTGTCCGTTCTCACATCGCACCTCTGGTCAACTCCTG	-0.135371	80	64
AAAAAAGTGAGCGGGGCCTACACCGTATCACCAGTTGCTCCCAACTAATC	-0.517485	41	22
AAAAAAGTGTAAAATCAATGAACGTTTCTGAAAATATAATGCTGTGAAAG	-2.09006	43	4
AAAAAAGTGTCAATGGCGCCGGAAAAGTGGACGTGATCGAGTTTAATCAT	-0.649279	24	11
AAAAAAGTTATCAGACTATCGACGGATTTGTACGTTAGTGGCACCAAATT	0.477545	132	196
AAAAAAGTTCCGAATGAAAGGAGGCGCTGGGGCCACATAAGCAAGACGCC	-2.25068	30	2
AAAAAAGTTCTACAATAATATTTCTATGTACGCCTGTTTTTATAGTGTGC	-1.78711	12	1
AAAAAAGTTGGCGACCTATGTGAATACAACACCCTTGAAGCACGCACACA	-1.28679	66	16
AAAAAAGTTTCCCATCCCGTTACCGCCTGGGAGAAGAATGACACTGGTAG	-1.56213	108	20
AAAAAATAAACAGTTTTACTTATAAGTTGTACTATGCAGTATTCGTTATC	-2.24259	40	3
AAAAAATAACAGAATAAGAATCGAACTACCGACTAATCTTCAATATCTTA	1.86976	24	148
AAAAAATAAGTCGGCCCCACGCAAACATGCCCTGCATACTGTTCTCCTGC	-0.762607	20	8
AAAAAATAATCAAATAAGGTTTCCTCCACGTGGTCTGACGGTCCTTGAGA	0.345704	56	73
AAAAAATAATCCGAGAATACGTACACACGGGCTCTGCGATACAAAGCTAC	-0.398736	59	36
AAAAAATACAATCGGATGTCACCCGCTTGCGCAATGAGTCACCAGTAGTC	-0.599154	106	53
AAAAAATACGACTAGCTCCCTTTCTATATTGAACATTATTAGCTAACGCC	1.5837	43	196
AAAAAATACTGGCAAATTAATCTAGAAGCCACACCCCGCTTCTTCGCGCG	0.141849	33	35
AAAAAATACTTTCATGATAGCACTGTGCTGCCAGGTGATCGAGCCCTTTT	0.432997	11	16
AAAAAATAGTAGTCCTCGCCGCTTAGGCCCCGACTCTTATCCGACCCACC	-0.184973	54	41
AAAAAATAGTATGTTATCAATAGCCGGGCCTGGCATCATGGGTTCCGCGT	-1.44137	45	9
AAAAAATAGTCCTGTAAGTACTATTTCACGTGACCACTGCCTCAAAGAAG	1.24393	15	50
AAAAAATAGTTTTACAGGACCAAACGCGCCCCGCACGAAACCACCATAGT	0.931988	8	20
AAAAAATATAAGCGGTGTTACGATCCCCCTGTTTTCAGACCATCATGGTC	-0.644824	55	26
AAAAAATATGCCCCGACGCACGTTACTTAGCCTTAAGCTCCACGAGTAGG	-0.790778	47	19
AAAAAATATTACAGAGGCCTGTTCGGAATGGATAACAACATACCTGCAAT	-0.677449	14	6
AAAAAATATTCTTTAGATCAAAATGCAGAAGCAGCCTTGTGCGACAAACT	0.490156	1	2
AAAAAATATTTAGCGTCGCTGGAGAGGGTATAAACGGAAGGCACCGGGAC	-0.545936	61	32
AAAAAATCACAACCGTGAAAAATGAGCGAGGATGTAGCAGACGCGCGCAG	-2.62336	29	1
AAAAAATCACCCGATTAAACTAAGGCGACGTGATGAGGCTGTTGAGCAAA	0.434066	54	77
AAAAAATCAGGCCCATGGCCAAACCATCAGGCAAAGTTGTCCCAGGAACA	0.722268	36	69
AAAAAATCCACGCAATGCGAGTACGTAACGTACCCACCTCACCAAACGTG	0.670592	58	105
AAAAAATCCAGCACTACTACATGTTCATCGCCGGGCCGGCATACACATAC	0.676742	25	46
AAAAAATCCAGGGGCTTGAACCGATTCTAGTTTGCAGGGAGCTGTGATCA	-0.458925	61	35
AAAAAATCCATTAGCCCGAACCTGGCCATGCCCGAAGTTCAAAGTACGGT	-1.70707	23	3
AAAAAATCCTCCTATTTAAGAACCCCACCTCGTGCGGTCGTGAAATCTGT	0.82101	33	70
AAAAAATCGAAACCATCTCCAGAATTTCACACTCGCGAAGACACCTCACC	1.04153	57	150
AAAAAATCGAGTAACAAATAATCTCTTACTACTTCGTGGTATTTAGAGAT	2.09959	3	29
AAAAAATCGATAACTAAATCCGCGCTATACACGAGCGACAGCGAGCCCGC	0.480586	34	51
AAAAAATCGCCTTAGTGCTAAGGGTACTGCCCCGAGCACGGCACGACCTG	-2.76794	51	2
AAAAAATCGCGAAGAACCTTGCTGTGAACTGCAAACTTTATGTTTGCACC	0.425617	63	89
AAAAAATCGCGTCCCCGGACAAGTACCGCTAGTAAATACCCTGGCATATT	0.718414	25	48
AAAAAATCGCTTTAGCGATCACCTAATTATACTAGACTAACAACTTGCAC	0.983887	58	144
AAAAAATCTAAAAACAGCTGATTACCCTCAGGAGTTCTGTTTCTGGCTTT	-1.93021	14	1
AAAAAATCTCAACCACGTACCCTTCAAAGCTAGGTTAGCCTGAGAACCCC	0.505194	43	66
AAAAAATCTCGCCCCATCGGGCAGAAAAAGTTAAACACCTCTTCCAACTG	-1.96658	69	8
AAAAAATCTCGTCCCTTGCAATGTTTGAATTTGGACACTAATATGAAGGG	-1.06393	40	12
AAAAAATCTGTAACTATTAGCACCCAAAAACTGCTCAACCGAAACTGTAA	1.0402	9	25
AAAAAATCTGTGTCCCAGCTAGCTAGGAAAAGCTCACAGTCGGTAGTTAG	-1.49576	33	6
AAAAAATGAAAGCCCCTACTCCGACGCGAGCGACCGTCCATTTGCAGTAT	-0.0550714	45	39
AAAAAATGAAGACTTCGCGGAGGTGCAATGCTGTGGATTAAACCGCTATT	-2.6879	31	1
AAAAAATGAAGCCTGTACCCCGCGGTAATTCCCAAATCGGTTGCGTCTAA	-0.859771	53	20
AAAAAATGACCCCAAAGCATACCGTGGCCGTCCGACACCCTATCGCCTGC	0.219727	82	94
AAAAAATGACCGATCACAAATTCCGAAGTCTACTTTTTAAACAAATACTA	-0.202991	3	2
AAAAAATGAGCAGAGAGTACCGACAAAAGGCCTCACCATGTCGCCATACG	-1.01392	8	2
AAAAAATGAGGTTGTAGGGCATGCCTTAAATTCACCTATTGTTCAGAAGG	-0.36426	46	29
AAAAAATGCGGCACAATCCCGCGACATATTACCAACGAGGAACCTTCCTT	0.421163	19	27
AAAAAATGCGTAGATGCATCAACATTGAAAGTATCGAGGAATAACCGCGA	-2.6879	31	1
AAAAAATGCTCATGGATGAGCTGACACAGATTTACACAATCTCATTCCTA	-0.626156	56	27
AAAAAATGGCATTAATCGTACTTAGTACTACGATCACAGAAACCGACGGC	-1.08538	28	8
AAAAAATGGTTGGCCACGTATAGTGTAAGGGCGCGAGCGTACGTGGGCGA	-1.28586	62	15
AAAAAATGTACCCAGTAGACGTTGCCTCAGGAGATTAGACGGCTCGCGAG	-0.244789	56	40
AAAAAATGTACGATTCGTTTGTCAGGGACAGTCGCCTGCCTCCATAGTAC	-2.5087	106	7
AAAAAATGTGATGCTCGATACACAAATAAATCGCTCGGGGCGCGGCGTAC	-0.143093	53	42
AAAAAATGTGGTTCCATTATGGTTCGTGTTCACTGGCGCAGATTCAACGA	-0.882893	49	18
AAAAAATGTTAAGTGGGGTAATTTCTTGATTAGAGTGCTACCGAACCTGT	-1.52475	19	3
AAAAAATTACACATGCGGAACTGGTGCTCCAACTCATTACGCCCCGGAGT	-1.25904	68	17
AAAAAATTACTTCCAGGACACTTTGATCTTAGGGGGTTTCCGCAAACTGA	-1.70707	5	0
AAAAAATTAGCTTACAGAGGGGGGCAAGCCCAGCACGCTAAGGATGCTCA	-1.04671	30	9
AAAAAATTAGGGACTGAGAAAAGGTAATCAACCGTGTAATCCAGACCTAC	0.366103	39	52
AAAAAATTCAACCGACAATCAAAAGAAACAGTCTCTACTCTGGTATGCCC	0.0105826	55	51
AAAAAATTCAACTGAGACGTTCCACCTCCCCAAACGATTATAAACAGTAA	1.6194	24	115
AAAAAATTCGCGCACGTGATCAAATGTCCCCAACTATGAACCGGCATCAT	0.713299	7	14
AAAAAATTCGCTTGATGGACCGATCAAAGTGCGCTACGTTCCACCCATGC	-0.249316	80	57
AAAAAATTCGGAAAATTATCGTGGACCAATGTAATCTCTGAGCTGGTCGC	-0.713817	19	8
AAAAAATTCGGAACCCATACCTCCCGTTCAATACAGGATGAAGGCGAACG	-0.0823635	25	21
AAAAAATTCTGATCGATTCCTATTGATTGCGCCAGGTAACTGCCCTTAAA	-0.637444	34	16
AAAAAATTGAAGCGACAGGTGTATCTTAGCCAGAAGAAAGGCCCCGTCGT	-1.11401	62	18
AAAAAATTGTTTCAAGGATGCCGAGTAGTTCCACGAACCAGTTCTCACAA	0.559149	27	44
AAAAAATTTCCGGAACCAGTGCAACGCATAAAGAGTGCAGTGGTAGGCCC	0.447596	15	22
AAAAAATTTGGGTCATCTTTGCGACGAGTCGCCTGACATGCATATCTACG	-1.963	30	3
AAAAAATTTTCCCCTATTCCTATGTCAAGGAATACCCGTGCCCGCACGTC	-1.38165	38	8
AAAAAATTTTTGGGATAGATCGAATAGACGCGAAGCCTGATTTAGCAGCA	0.151382	28	30
AAAAACAAAACACAAGCAATAGCTGCCTATCCAACCCTGCATTTGAGCAT	1.01625	25	65
AAAAACAAACTGACCTAAATTCCAATTTCCGTGCGTTCTGGGGAAGAGAA	0.243755	28	33
AAAAACAAAGCACGGATTCAGTGCATGGCAACTACAAATATATACCTGTT	0.285361	8	10
AAAAACAAAGGAGTATATGCCCTCAGAACCGTATCCAATCCAACCTACCG	-0.0912001	61	51
AAAAACAAAGGTACAAACGGTATGTCTGGTTCACGACCGAGGGAAACGCC	-1.1264	46	13
AAAAACAAATTAAATACCTAACCTCCCTTTAGAGAAATCATTGAGAGTGA	0.958219	42	102
AAAAACAACACCTCCATGTCGATGAGGGGGCAACACACATCTCCTGCAGT	-0.493387	40	22
AAAAACAACACCTGATTTCATCCACAAATCCTAACCGCGGTCCTCTACTA	0.190051	17	19
AAAAACAACCTCATAAAGCTCCAATGTTATGTCATGGTTGATCGCTAATC	-0.688499	12	5
AAAAACAACTAATACAGAGTTTCGCTGGTACCCCTCTCCCACTTGTTCTG	1.78944	11	65
AAAAACAACTCAACGACTATAGCAACCTTTCAAACTTTTGCGGCCATCGC	-1.94346	37	4
AAAAACAAGCGTCCATTGGTAAATGTACCGTAATCGACAGCCTTTCCAAC	-2.48026	12	0
AAAAACAAGCTAGCAACTTGATTAATTCCGCAAACAGAAATTTCAGAGGT	-0.608457	1	0
AAAAACAAGGCGGCCCCCTAGCTTGAGCGGTCGTCTTCGGCTACTAAACT	-0.8316	29	11
AAAAACAAGTTCAAAAAGTCTAGCAAATCGCATCGGATCAACCCGCCCCT	0.392175	24	33
AAAAACAATACTAACGACTTCGATTGTAAACAGTAAATCTTGATTAGCAT	-0.357142	13	8
AAAAACAATATATCAGACATAAACGCGAGGGACAGAGATCGGTAGTAGCC	0.199101	32	36
AAAAACAATCCGAACTTGTGCGTCGCGAACTAATCCCACTATCTCGCCTA	-0.0330924	8	7
AAAAACAATCTGCTAACGTCCAAAGTTTCTACCAAATTGACGTCTCAAAA	1.66023	11	57
AAAAACAATGAGCCTCTATGTACTAGAAGGGAAAACTTGCTAATGATATT	-1.80238	32	4
AAAAACAATGTAGCGAGCGAGCGGATTTCCCATAATCGGGCCTACTTCCT	-1.66055	62	10
AAAAACAATTCGTCGATTCCTGAGGCCGACACAAACGCCCAACGCGCGGT	-0.439834	48	28
AAAAACAATTCTTACACATGCAGTTTTGTATAAAAAATGGTGACCCAGTG	-0.503096	8	4
AAAAACAATTGTGTAAATCTTCCCTCCTCAAAGGGCTAGCGTCACGGCGA	-0.917461	78	28
AAAAACAATTTATTCTCATCATCAGCCCGGCCGTTACTTCATGGTAAGCT	-1.01392	2	0
AAAAACACAAACCTGCCTTGATACTCTACCGCCACGTGTTTTGGACCGCA	-0.0184936	50	45
AAAAACACAACACAAAGCACGTTTTTACGGCAACTTTGGAAACAAAACCA	1.1833	22	68
AAAAACACAAGCCGGATCAAATAGTGAACCCGTAAACAAACCGGGGACCG	0.552287	51	82
AAAAACACACCCGCCGATAAAACCATTTTCAATCCCATCCTCACTAGGTA	0.347055	9	12
AAAAACACACTAATCCGAGGATCCAGGGTTCGAACTAGAGAATACTAATA	1.13885	45	131
AAAAACACACTGAACCGACGCTAGAAAGTCCCCCGCCACCTGGCTAAGCA	0.51442	94	145
AAAAACACAGTGCTCAACTCTCGCTCTAAAAGTTCTAGGCTTAAATTTGC	-0.236217	50	36
AAAAACACATACAATCAGAGTTTGGCAAGTTCTCCTTAAATTACACGAAT	1.51052	30	128
AAAAACACATCAATAGTTTACTAAAAGCCTACGACTGTCTAATTACACAC	2.04295	22	162
AAAAACACATGATATTCTGCGGAACGAGAAAGCATTAAGCTTCTCCATGT	-1.68109	75	12
AAAAACACCCATAATACAGGTTTTCAACTTTTTGGGTACATGCGTCCGGG	-0.608457	3	1
AAAAACACCCGAACCATGGATTCTGTGATCTATTTTACGACAACACGAGC	-1.08943	54	16
AAAAACACCGAAGTTTTTAAGACTGACCATTTAAAGTACGAGCCCCTCAC	1.08152	30	83
AAAAACACCGAGATCCCCCAGGGGTCGGATGGTTACCTTGGCCTAACAGG	-1.46287	46	9
AAAAACACCGTAGCCAATGGATTCAATGAGGTACAATACACGCGTCAGGT	-0.931684	104	37
AAAAACACCTCTTTGAGCTTCACCCACCTAGTGAAATAGACCTGTTTGGC	-0.12503	36	29
AAAAACACGCCTAGAGGCACCAACCGGGATTGGTAAATTTAGTTCTAGAG	-0.608457	1	0
AAAAACACGCTAGACTCTTGACTTCGAGGTTCTAGTGTGCCGTCGGGACC	0.15615	80	86
AAAAACACGTTGCCAGTGGGTCAGCGACAGCCTATAAACATACCACACCG	0.74885	34	67
AAAAACACGTTGCGAGCCACGTTTCACCTACCATATCCCATAACAGACCT	-0.608457	1	0
AAAAACACTAAAAGGAGGTGTAGTCTACCGTAGATTTGAGTACAAATACT	1.00542	44	112
AAAAACACTAGTCGCATGGAGCGCTCTCTGTAGCGTTTCGCTACAAGGTA	-0.951849	202	71
AAAAACACTCGCCAGGAACTCTTTCGGGCGCTTAGGCCCCGAATGTATCT	-2.40022	11	0
AAAAACACTGTTAAGCGAGGGAAGACGCCCAACCTAGGCAGGGCAGCCCC	-1.08735	112	34
AAAAACAGACATTGCAGCAGACGGAACTCTACCACTAAATGGACGCAGCG	2.21632	13	117
AAAAACAGACCCGTTAGTTAAAAGCTACGACAGAGGCTCCGAAATAACAG	1.53161	11	50
AAAAACAGAGAACTAACTCTAGCAGTTCGTACACTACCGGTGGACCCTTT	-0.641246	30	14
AAAAACAGATGAAGTAGCCAAGTACAGTAACAATGTCTTCACAGATATGC	-1.73447	36	5
AAAAACAGCAATGCTAGAATCTCCGTAGGTAACGGTATCGACGACGAACC	-0.580286	34	17
AAAAACAGCGCCTTGCAGCAAGAGACACAGAAAAATACCCCTAAGTCCGC	1.08566	42	116
AAAAACAGCTAAGGGCGACCCTATTAATCCACACTTAGGACGTAATAAAG	1.33745	13	48
AAAAACAGCTCGCGTGCCTATCTGGTTACCGACCTGTCCTTTACTCCGCC	-0.385313	23	14
AAAAACAGCTTTTAGTAGGAAAGGATGCCCTCCCAGTGTAATCCAGTCAC	-2.19769	48	4
AAAAACAGGACATAACAAACATCCTTCTTCAGAAAAGTAGTCAAGAGATC	1.83026	47	274
AAAAACAGGGTAGGATCGCTAGAAACTCGCCAGCTAGACGTCCGCGTCTG	-2.1666	37	3
AAAAACAGGTCGGCGTATACGCTCTGAACCGGCCCAAGCTCAATCCTTAC	-2.05538	33	3
AAAAACAGTAAATGCTGCGGCGGGGTTTCGAAGGCCAAAGCTTCAGGAAG	-0.00628119	68	62
AAAAACAGTAGAATCCATAACTCTAGTTAAGCACGGGGTTAGGTGTCAAG	2.05234	12	92
AAAAACAGTATAGACTGCCTAGCCAGGGGCTCTCAAGAACTTGCAGTCGA	-0.896139	55	20
AAAAACAGTATCTACGAAGTGTCATGCATCGACCATAAACCCACGCTAAC	-1.95838	53	6
AAAAACAGTCCCTACACCCCCTCTCACTTCGCCAGACGCACTACTAAACA	1.55248	52	229
AAAAACAGTGACGAGCTGCTTACTGTTCCCGACAGGCGAAATTAACGACA	1.01046	20	52
AAAAACAGTGCACCACGAACTCGCCCAATAAATGAGAAGTGCCATCCCAG	-0.492625	56	31
AAAAACAGTGGGTTACACCTGGCCAGTCCACTCACTGGATCCCTCCAGCG	-1.06393	40	12
AAAAACAGTGTTGTAGCAATTCAGTAAACATAAGGTCCTTCGGATGGCTA	-0.994119	49	16
AAAAACATAAGAATTTGCAGTGCGCCCGCTCGACAACAACCGATATCTTA	2.38138	16	168
AAAAACATACCCTCCAATCTAGAACAACAACCGAGAGTCAACAACCCGGA	-1.3016	19	4
AAAAACATACGGTATCTCTCCATACAATTGCGCCGATTACTTATGCGGCT	-1.3016	11	2
AAAAACATCCCCTATAGCCCTACGACTCTCGGACTAACGTTCCTACCATG	1.16142	76	225
AAAAACATCCCGGTCAGTCTGAAACCGACTCAAGACCGGTTCTCGTGTGC	-0.896139	7	2
AAAAACATCCGACGAGGTTTTCCAACACATCAAGTCCTGACCGCTGGCTT	0.229272	44	51
AAAAACATCCGATTCTACTTGTACAATGGCCATGTTCCCACTAGCGGGGA	-2.28243	31	2
AAAAACATCCTCGGTTTACTCTAACCTAGCGCTGCGCGTAGAATGGCACA	-1.01392	62	20
AAAAACATCGGAAAGAACGGAAACATTCTAACGGATTGCAGCACTGGGGT	-3.21115	26	0
AAAAACATCTCCAAAGCAACCGGCGGCCTGGGTACGCAGATGTGTATTGC	-1.06044	21	6
AAAAACATGAACCACTCCTTGTACTCGTAAGTGCGCCCTACGATTATACC	-1.09396	64	19
AAAAACATGCAAGACACTATTTCATCGAAGGACTAAAATTAATTAGCGAT	0.0846906	2	2
AAAAACATGCACAAGGCTAGAGTTGCGAAAATTGAGATCCGGTTTATAGT	-1.14526	64	18
AAAAACATGCTCGCAAAATTCGCGACGATGCCGCTAAATGCGCCAAACGT	-0.682565	27	12
AAAAACATGGATGACCACAGAATTATGGCTAAAGAACGCCCCGTCGCTAC	-1.01392	14	4
AAAAACATGGTGTTTGTCAGCCCGAACATGTGCGTGACGAATGCACGTGA	-0.63831	67	32
AAAAACATGTATGGAGTACCATCTATCACTCGTGTTGCGTTACCTTCGAC	-2.37205	34	2
AAAAACATGTATGTAATTGGTTGTACAGGGTATGGTTAACACGGTATCGC	-1.77606	44	6
AAAAACATTATTTCAAAAATGAAAAAATCGGACCCCCTAGCCGTTCCGCG	-2.06071	93	10
AAAAACATTGTGGGCAGAGTTGGGCACGGTGAACCCATGGCCTCGTTAAC	-1.48393	47	9
AAAAACATTTACATAATGTGTTAAAACGTATGCGTTCGAAGTCGTGTCAC	-0.608457	1	0
AAAAACATTTGCTTCCTGGACTATGAACTCATACGCCGCTTGTGGCCCGA	-0.243813	24	17
AAAAACCAAACGCGTGGTGTTGGGATTCCCCTCAGTTCGACGCGCTCGGG	-0.896139	15	5
AAAAACCAACCCCAAACCATCAAGCCCCATCACAACCTGAGCGCCAGTCG	-0.608457	53	26
AAAAACCAACGATTTGCTAGATCGCCAAAAATAATCTAGCGCACGGATCA	1.36941	43	158
AAAAACCAAGACGAAATTTTCCGCGAGAAGATCCCAATCCTTGAACCGCA	1.04253	32	85
AAAAACCAATAAATCCCCCCCAGTCTACCTAAACGTAAATACAAATGAGG	0.860076	34	75
AAAAACCAATTGCAAGGTTGATTCATAGGGATATCTCAACCCATAAGTAC	0.432997	35	50
AAAAACCACAAATCGTTACCAAGCCCGCTCATGCTGACTAAATTGTTTGG	-0.246667	38	27
AAAAACCACACGATTGATGCAATCACAAAGGCGCAACGAGTCCACACACA	-0.0743741	33	28
AAAAACCACATGTCGCATCCCACCCAGTGACTCACAGTGAGAAATAACCG	-0.467378	32	18
AAAAACCACCGTCAGGACCATCTGAGTTCCTTACATGTGAGTAATCCAAT	-1.19297	60	16
AAAAACCAGAACTGTCGTATCATCAGAGTACGCACTGCAGCTCCATATCA	0.739477	92	178
AAAAACCAGACGCCGCGGAAACGACCCAAGACGCCCTTGCATTGTCTTGC	-0.202991	3	2
AAAAACCAGAGGTGGGTTACCTACTGCCCACACAGAGCGGGTAGGACGTT	-1.47749	61	12
AAAAACCAGCTCCCATATTTGGGTAAGCAGGCGTAGTCTGGTGCGCTAAA	-0.861453	84	32
AAAAACCAGGAGGGGTTTACCAAGAGCTGGCCTGATGCGGCGCATACCCG	-0.608457	1	0
AAAAACCAGGAGGGGTTTACCAAGAGCTGGCCTGATGCGGCGGATTCCAC	-0.717656	28	12
AAAAACCAGTCTCTTGGTATCTACCGCGTTGCCATCGAACTTCATGTGAA	-1.3016	75	18
AAAAACCAGTGTTTTCGGAAAGTGAGGTCTCGAGGCTACGTCTAGCAAAA	1.0402	9	25
AAAAACCATACAATTATTACCCAGATGCGTCCGTTCCCATATTATTATCC	-2.42762	36	2
AAAAACCATACTTAGACATAGTAAGGCCACCCCGTTGCCCGCGAAAGCGG	-1.54277	55	10
AAAAACCATATTAACCGAGTATTAAGCATATTATCCACTTGCCCTCTCAC	-0.00628119	22	20
AAAAACCATCGCCTCACATAGCGGAAGTTTCCAATGCAACGCCCACTTTC	-2.08436	34	3
AAAAACCATCTAACAATGACCGTTTGACGGCAAACGCGGGGCTCTCGTAC	-2.02984	57	6
AAAAACCATGTGTACTCATATGTCTATCTCACATTTACTTAATCGCTTGC	-0.771782	72	30
AAAAACCATTATGAGTGCAATGATATAGGAGTGCCTTCGCAATATGACGA	-2.09006	43	4
AAAAACCATTGAAGTTACGACATCTTGTCAAAAGGGGTGAAGATATGAAA	0.277062	32	39
AAAAACCCAAATTATGGTAGACGACGTCCCAAAATCCAGACGCCAAGGTT	-1.86122	34	4
AAAAACCCAATGCGGGCTAGTTAAATTAGTTCTCGACGTCATTTGCACTT	-1.07846	15	4
AAAAACCCACAATACGCTCGCGCACTCACACAACATAAACACCCATGTAC	-0.528414	47	25
AAAAACCCACACCGGAAGTCGACTCCAATTTGACCTGCGAAACAAGTTGA	0.744686	45	88
AAAAACCCCACAAAGTCAAAAGGGAGTAGGATCCGGCCCCGCTCCCTTTA	-1.93021	14	1
AAAAACCCCTACACCCGACCCCTCAGGAGAATATTCAAATCGCGAGTTGA	0.75842	51	101
AAAAACCCGCAGGCACACACTGAGGTGGAACTGGGTCAATGCGCACTGGA	-0.947672	72	25
AAAAACCCGGAGTAAGGCGAAGTTGAGGGCAGCACCATCCAACATGTCAT	-1.56987	67	12
AAAAACCCGTGCAGGCTTGGTTAGATTGTGACCGTTGCATGACATTTGCG	-2.62336	14	0
AAAAACCCGTTACAACCGATACCTTAAAACTCAACCTAATTCAATAAGTA	0.296	50	62
AAAAACCCTAATACCCTCGATTAAAATTCTGTTCCGACCTAGCATCAGAT	0.190051	17	19
AAAAACCCTAATTACCAACCTAGGCGACCCGCTCTATTAGTTAAGGCCGC	-0.367295	131	83
AAAAACCCTCATAATGGTTAGGTCTTATCGCGATAGACCGTGCCCACATT	-1.72086	72	11
AAAAACCCTCCCCGACAGTTACTGGACAAAACACCCCAAATATTGTGAGG	0.459384	43	63
AAAAACCCTCTAGTATTAAATCGAATGCCCGATTATAACTCGCAATAGAC	-0.0359374	43	38
AAAAACCCTGATTGTTGGCACAGCGGGTTCGCTTTAACAAACTGAGTAGA	0.985477	51	127
AAAAACCCTTAGACCTGGTCATCTGTCTGTCCGTATACCGTGAAAATTGA	-0.263616	67	47
AAAAACCCTTCTTGGTTACCACTACGACCCTACGTAGAATACGCGCAAGT	1.19454	58	178
AAAAACCGAATATTACAACATACCGTGTGATACAATGTATAGGCCCAAGG	-0.346092	39	25
AAAAACCGAATCTAGAACCCTGCCGCTCCGATCCCAATCTGTTTATTACA	0.536676	27	43
AAAAACCGACCTAAGTCGATCATCGAGGCCCGACTTGTACACCGATTAAG	1.63623	31	150
AAAAACCGACTAACCCACAAGAATCCCAAACTCAATAGTTTAGCAGGTAG	3.08242	24	500
AAAAACCGAGGCTAGTTGGGAAAACCTACAATTCCACCCCGAACTCACAC	0.15615	53	57
AAAAACCGCACACAACCTTGTCTGACCGGGATGGTCATTCCAAGTGACAA	-1.77853	57	8
AAAAACCGCACCTCGGGCCGCTAAAATTGCGGCCACGATATTTCTTTTGC	-1.69026	58	9
AAAAACCGCAGACTAGTATTCATTTAAGACGATGGCCGCCGCGATGTACA	-1.96943	38	4
AAAAACCGCCATGCATGATAAAGTCGTATCTTTGAACTAACGCGCTCAGT	-1.77161	127	19
AAAAACCGCCGACCTAGGCCGCTAAAAATTGGGACGCTGTGTCCCCGTTA	-1.3016	19	4
AAAAACCGCCGCGGAACGATTGTCCAGATTCAAAAGGCAAATTTGCCTCC	-0.173139	21	16
AAAAACCGCTGGTATCGTCACTTAGTCGGCGGTACTTGACACAAACATAG	-0.626806	54	26
AAAAACCGCTTGGCGATACATCCGATAACACAACGGAAGCGGTTCCTAAC	0.475118	66	98
AAAAACCGGACAACCCGGCAGTGAATATCAAAGACAAACATCCGTATAGG	0.372373	11	15
AAAAACCGGCCCGTCCTGAACGAGTTACTGAAAAGAAATTAGTTCTCAAA	2.04295	22	162
AAAAACCGGCGAACATAGCACAGAAAGTGAAGTGCTCTACTACCTGATGA	-1.1317	26	7
AAAAACCGGGAGGAGCCGATGCCACTGTCAGTGTCAGCGCAAACACTTCG	-0.467378	32	18
AAAAACCGTACTTATCAACGGCTCTGTCCGGAAATTGATTCGATTACGAA	1.71066	23	121
AAAAACCGTATTTTAGTCTTTCCTAGCAAGCGCAAATCCCCAGGAGAAGA	-0.0778283	59	50
AAAAACCGTCCTCTGCAGGGGCACACCCAGACGTGACCATTTTATACAAC	0.0846906	1	1
AAAAACCGTGTCATTAGCTCGGGAGAACCAGTAAACTCAAGCGCCTTTAC	-0.367295	43	27
AAAAACCGTGTCCGTGCTTTCGGATGGCGTTAAAGGCCGGTGCAAACCTA	0.0495993	28	27
AAAAACCGTTGTCTGGATTCGTTGCGTCCATACACGCCGGTTTCCGATAG	-0.0796125	98	83
AAAAACCTAAAAAGATGGGTTTGATAAAAATTCTCGCCACGAAAGGTTCA	0.87962	27	61
AAAAACCTAAATTCGCAGGCCGGAGTGTAGAGAATCATGCCGATCAAGTA	-1.79408	71	10
AAAAACCTAAGCGCTGGACCCGTCAGGACACCTTCGCGAAACAAACGAAT	-1.68602	46	7
AAAAACCTAATCGGTACGATGCCTAGCGACCCTACCCCAAGTGTACACGA	-2.58946	57	3
AAAAACCTACCATCTATCCCCCTGTTTCGACCGGCAATCAGAGCAATAAG	1.39094	38	143
AAAAACCTACGTAAACACCCATCATAAATGGCACCGGAAACGGAAATCGC	-1.86122	6	0
AAAAACCTATAACCAAAATGCGGCTAGGTGCGCCCCACCCCTGAGAGACC	-1.11928	29	8
AAAAACCTATCTCAATGGTCCAGCGTGGCTCCATAATTTCCCCCGCTGTA	0.690826	17	32
AAAAACCTCAATAGCGTGCTTGATGCCTTTTGGATATCGCAGCCCCCTTC	-1.0973	74	22
AAAAACCTCCGAGCAGATCGGCACAGTAATTATGCAGACGGGGCTTGGGT	-1.46287	46	9
AAAAACCTCGGGCAAACACGACGGAGGGAGGCGAGCTGGGAAAATTGAGG	-0.561937	146	76
AAAAACCTCTAAATTGTTTAAAAAATCTACTAGCACGGATCGAAGTCATA	1.11431	19	55
AAAAACCTCTCTGCCAGCTTCGCTGAGCCATACGCATTGGTCAACCTCAA	-1.90774	65	8
AAAAACCTGAAACTGTAGTTATAAATCATCGAATGTTGAGCACCCATCGA	0.00199888	62	57
AAAAACCTGAGAACGTCATCCAATCCTCCCCCGAGATATGCCTGATCTGG	-1.94346	75	9
AAAAACCTGTGGGAAACGTCGCCACACCTCGATGTCCTTTCGCGAAAGAA	-0.8316	49	19
AAAAACCTGTGTTTCGCCAGTCAAATACTGACCGTTTATACCGCCGACTT	-1.14745	47	13
AAAAACCTTAAAGGAGATCCTGGAGTCCGGATATTCCACCTGTCCCCACG	0.831905	17	37
AAAAACCTTCGCTAAAGCCATAATACTCCCGCCTTACGAAGGTGCTAATA	1.00098	47	119
AAAAACCTTGTCTATATCTACGCGTTAGCCAATCTTATATATAAACATAC	0.75374	20	40
AAAAACCTTTAGCGACCTCCCTTAGTAAAAAACTAGTTACGGACTGAATT	0.317023	64	81
AAAAACCTTTATGGTAAGCGAGCTATCCCCTAAATACATCGCGTCATTGT	-1.92278	66	8
AAAAACCTTTCTGTAACTTTTCATGCACCGATTTTGACGCGAGACTTTAT	-1.01392	23	7
AAAAACGAACCCGTTCGTCTCCACAGAAAGATCGGAGTCATTACTGGGGG	-0.637444	34	16
AAAAACGAATGTATCAGTTACCATGAATGACTTTCTGGCGACGGCTGGTC	-2.06189	76	8
AAAAACGACACATGAGTGCTGAAAGGCCACGCAAACACCTAACTTTACCG	1.12614	11	33
AAAAACGACTGACAGTTAGCCGAAGGCTCTCCCTATAAACTAATAAACAC	1.24784	14	47
AAAAACGAGCGTCAAGCACCATAGCAAGCTCATGGGCCACTCATAATAAC	-1.66933	51	8
AAAAACGAGGGAGACCACGATCTAACAACGCTCCTGTGTATCTTGGACTC	-1.09396	25	7
AAAAACGAGGTCGTCGCTTACGTTCATACGATTTGCGGAAACCTAAAATT	1.20962	24	76
AAAAACGAGTACTGTCGCGATCACAACCTGATTTACAGCTTTGATCGATC	1.04295	83	218
AAAAACGAGTATTTGGTCTGGGCCGTCTACGATGCCATGGCGACAACGCC	-1.88142	49	6
AAAAACGAGTCAATAAGAATCCCTATGTCTTCGTTGCGAGGCATGCCGAA	-1.60699	75	13
AAAAACGAGTTGCTAGACGAAATCAGGTTGCGACCATGGACACTCGCGTC	0.954768	30	73
AAAAACGATAGTACTCACACGACTTCTTCCTCGCACTCACAAGTACAAGC	1.96101	16	110
AAAAACGATCCCAGTAATCGTTCGCGTCCGCAAGTGGCGAGTTACTCCGT	-0.0217929	98	88
AAAAACGATGATGGTCGGATGACACGTAAAAATGATGACCCTGTCAAACC	-1.6789	69	11
AAAAACGATGCGTTCCAATCTGGTCTTTTCACCAATGTCCCCATAGATCA	-1.38165	25	5
AAAAACGATGGCCTCCGCATCCATATAAAATAAGACGTCTATCACGTGAC	-1.35379	58	13
AAAAACGCAAACGCGGAGTGTCCGATGTTACGTGACATTTGCACGCTAAC	-2.48026	12	0
AAAAACGCAAGGACAGCCACCTCTTATAGTCCCAACCATCACCCGCCGTC	0.971994	13	33
AAAAACGCACATACTGTTGTGTAGCCAGAAACCCAACTCTGTCGTACCCA	0.347055	49	64
AAAAACGCACTGCGTTTATCTGAAATGCATAGCGGATCATAGCCGTGACC	-0.952228	109	38
AAAAACGCAGCAGCCGACAATTACAATCTTACATTGACCGTTGGATGCTC	-1.09396	25	7
AAAAACGCATCAGCCGACGACAGACGTTGGCCCCATTCAAGTAAATCCAG	0.290823	82	101
AAAAACGCCACCCCTAACTACACGGGACGGTCACACTAACTACTGTCGCT	0.00570218	78	72
AAAAACGCGACCACTACTGGTAAACTACCGCAACCTACCAAAACACTGGT	0.709519	52	98
AAAAACGCGAGCCCTCTTCCACTGCGTGCCTGTATATAACAAGTAGGTAT	-0.906501	96	35
AAAAACGCGCCTTGATACCCTTCTATGGCTCCTTGCAGTGGAATGGTGCC	-2.11253	53	5
AAAAACGCGGCGATCCCAGGCCGTAACATAATCCGACTCCTGCCAGCTGC	-1.81243	19	2
AAAAACGCGGTCCCTTCGACCAAGGTCTGAACTCTCCGTCGAACGGTGCG	-0.294799	37	25
AAAAACGCTACTGGCGGTCATCAGGTATCCTTAGTTGGCTCCATTATTAA	1.57635	8	39
AAAAACGCTACTTAACAAGCTACTTCAATACAGCACGCTCTAGAACACCG	1.83249	30	177
AAAAACGCTATACAAACCGTGGACAAATCTGTCAGGTTCCAGAACATCCG	0.675184	81	147
AAAAACGCTGATCGAATGCCTCATTGTCCGACTTACCCCATGTTGAGCCA	-1.36223	16	3
AAAAACGCTGTGCGTTTTGCGTCAGCCTGACCCAACGCAACCGCGGTTTT	-0.896139	39	14
AAAAACGCTTTCTCCCAAAAAGGCAGCGAGTGGTCCCAGGACTTTCAAGA	1.46051	47	189
AAAAACGGACACGTAACATGGTATTGCATGCCAATTATTTGCGTTACGAG	0.690826	35	65
AAAAACGGAGCCATTAAGAGTGGAATTTGCCGGAAATCGATCCTCGAGGC	0.610784	103	175
AAAAACGGAGGCTGACGGAATCTCTGGAACCTGATGAAAACGTCAACTGC	-1.81955	46	6
AAAAACGGATCCATGTGCGCTATCTTTGAGCTATGCGAGAGACTCTATCA	-1.07276	69	21
AAAAACGGATCGAAATTGACTATCTGTCAGTAATTACTCCGACGTGCGCC	0.225273	52	60
AAAAACGGATGGGCTCTGTTGACCGATACACAACTCTCTTCCTCCGCTCT	-0.780307	18	7
AAAAACGGATTCGTTGATTAATTGCAGATTATAAAAAATGCTCTAACGCC	-3.00635	21	0
AAAAACGGCAATGCAATCCTACCCAACCCTAACAGTCCATTCGTATTCAT	-2.19542	87	8
AAAAACGGCGGCACGAGAGGGGTCGGCCTAAGATCACCCTGACAATATAT	-1.52475	19	3
AAAAACGGCGTTACCGGTCGGCTTGACTTGACGCAATGAGGAAAAAGGAC	-0.503096	44	24
AAAAACGGGCCTCGGAGGCGGCAGCAATCGCTCAATCCGATCCCTCAGAC	-0.21759	45	33
AAAAACGGGGATCGAACCCGACAATCCATCGATCGCATGATTTACAATAG	-1.43318	72	15
AAAAACGGTCAGAAGACCACAAGTCACCGTGCAACTAATGAAGTGCCATA	-0.474925	20	11
AAAAACGGTCCTTTACCGTAACATCACCGTTCTAGCTGCCGGCGGGTGTA	-2.24259	40	3
AAAAACGGTTGAACATCAGAACAGAATACCATCCATCATCAATGGATTCA	0.365204	104	138
AAAAACGGTTTTAAGCTATCTTCATGACCAGTTGGACCGATAACCTTATA	0.36307	80	106
AAAAACGTAAACCTCAGAGATACTACACCCCGTAGAGAGTCGCCAGTTCG	0.421163	14	20
AAAAACGTAAATTGCTGGACGAACAACAGGGACTATGGCCGGCCTCTTAA	-0.88471	57	21
AAAAACGTAACATACCGTCCATCCCAAACCCGTGGACGGCGCTTGTTCCG	-0.608457	75	37
AAAAACGTCAAGGCGGCGCGTTCCTAAACTTCGCTGTACACGTGTATTCA	0.820098	138	289
AAAAACGTCACAACGAGCTTTATGTATATTCATGATGCCAGGTTCTTCAT	-3.00635	43	1
AAAAACGTCCTAAGAAAAAATGCGTGACGCGATCCATATCCTCAGCAGGT	0.00130898	24	22
AAAAACGTCCTCCAGATAACCGGCAGAGATTACCTGGTTCCCATTCGCAA	0.480003	32	48
AAAAACGTCGCGGCGTAAAGGACTCGATCGCTTTTTCTCTTAGATATTTC	-0.211575	38	28
AAAAACGTCTATTTCAAAAGTTGTAAATGCCGATCTATAACCCATCAACC	0.359127	56	74
AAAAACGTCTGAATACATATAGGAGTCTAGGTTTTGTTCCCGGTGCGCAC	-0.320775	5	3
AAAAACGTGAATCTTCCTAATCTACTCCAGACTAACCATACCAAAGTGAC	-0.133033	45	36
AAAAACGTGAGTCATTTCAACGCCACGCATATAGCGCGGCGTGCCGTATA	-0.608457	55	27
AAAAACGTGCCTAAAAAGCCTGATAAACAACAATAAGGTATGTGCTGTTC	-2.40022	11	0
AAAAACGTGTGTAGATCGGGCTGTAAAATTCGTCGGAACTTACCCGCTCA	-1.91341	58	7
AAAAACGTTAGAGATTGCATTTCTTACCCTCATAATTTGCCTGCCGTTTT	-0.534349	51	27
AAAAACGTTATCCGTCCTGTTGAACACTCATAGACGCACTGGTAGTACTC	1.02673	22	58
AAAAACGTTCGCAAAGCTACGAGTGTCCGGAACCATGTAGGGTACGATCC	0.905671	10	24
AAAAACGTTTATTAAAAGTCCTACGTGGATATTTATGGAGGACTACCCGG	-0.390733	36	22
AAAAACTAAATCCGCTCCGAAGGAGTCTCCGCCCCTGATGTAACCGTAAA	-2.35766	22	1
AAAAACTAACCCTGGTGGGGTTTACTCACTCCATGCTAGTGGACCCCACA	-0.859771	17	6
AAAAACTAACTACTCTTTTTCTCAGGGGTGTAAGCAGTGTCACGGTCGGA	0.978508	8	21
AAAAACTAAGGCCCCGACGGTAGCCGGCAATCTCACTTAGAAAAAAGAAT	0.452415	17	25
AAAAACTACCAGGTAAAGCCAACCGTTGCATTTCAACACAGAGGGACATG	1.75867	5	31
AAAAACTACCTATCGAACAACTGCTCATCATCCGATCTATTTCCTGGGGT	0.0617011	43	42
AAAAACTACGATCGCGAAATATAATGGTTTAGTCTTCCGATGCTCTACGA	-0.935141	60	21
AAAAACTACTAGTTAGATGATACTATACCCTGCGGCATCCGCGTGTGCCT	-1.90774	43	5
AAAAACTAGACCTAAATACTGCCGACCCACCTGTTCGGAAACCAAAGAAA	0.118592	28	29
AAAAACTAGCAATCATTCTAGCCCCTCATTGAGTTTGAGCAACCCGGAAC	1.03377	23	61
AAAAACTAGCCCGTTATGGTTGCGTGCAAATCCCACCTGTGTAAACAGGT	0.615319	9	16
AAAAACTAGCCGTTTGATGATTAATCTCAAAAAAAGAAAACGGACTGTGC	-2.76794	51	2
AAAAACTAGGGGAGCTAACGAATAAGGTACTTTGCATGAGGCGCAAAACT	0.123911	24	25
AAAAACTAGTACAAAGGGCGCAGCCAAGCACTCAAACGTAGTCCCTCCTT	0.577167	54	89
AAAAACTATATCCATTCTCCCAGTAGCATAGATTCGAGATGCCCGTGCAC	0.735874	72	139
AAAAACTATTCTGAAACCAAGCTCAGACTCGATCGTCCCGTCAGGAAAGC	1.17603	45	136
AAAAACTCAACACCGTGCCATGTAGACGAAATGTTCTGGAAACTATTGGT	-0.608457	1	0
AAAAACTCAATCGGCTGCCTTGACAATGGTTCGTTACGTGCCGTTAAGAT	-1.48935	110	22
AAAAACTCAATGCCCCACCGTAACGAGCTACATGGAGACGATTGACTTGA	-1.14397	40	11
AAAAACTCCCATCCGTGGAGGACGAATCAGCTGACAACTGCCGGTGACGA	-1.45951	88	18
AAAAACTCCGCACGAGTGCTTCCTAATACTAGCCCGAGGATAACACAATA	-0.106365	22	18
AAAAACTCCGGTTTGATACTCCCAAACGACACGCAGAATGCAGGTCTTAC	-1.95219	45	5
AAAAACTCCTGATATTTTAAAATCCGTGGAATATAGGTTTTATTCTGCTG	0.218222	20	23
AAAAACTCCTGGGTATACATAGTTTTAAAATGTATGTATGAGGAGGATTC	-0.608457	3	1
AAAAACTCGACAGCGTAGGCAGTGTGCGCATAATTCGAATGCCGGGATGC	-2.54239	82	5
AAAAACTCGACGCACGCACTCCTCATGCATTGCTTGAATATCAGAATCCG	-2.06374	59	6
AAAAACTCTAATAAATTTATTGACCGAGACAGCGGGCAAGACAGTAATGG	-2.21789	19	1
AAAAACTCTGATGGTTCGCAACCGCGCGCCTCGAGACTCCAAGGCAAGAG	-1.16807	6	1
AAAAACTGAATAGGAGTGATGCAGCATAGTAACGCGCAGATCAAGCTTAG	-1.41939	71	15
AAAAACTGACGACAACCCTGCAAATAGCTCCATATGGTGTCACTGATGGT	-2.95983	41	1
AAAAACTGACTGCATCCAGAGCACGGAACTTTATGTGCCGACTTTCACCT	-0.361597	24	15
AAAAACTGAGAGCGAGGGCATTAGATGAACAGCTATAATGGACAAGGGGC	-2.05538	33	3
AAAAACTGAGCCACCGCACGGCTTCGTTCTTGCCTTCCGCATAGTCAAAT	0.151382	28	30
AAAAACTGATCACATATCGGCATTAGACACGCAGGATACAAGGTACTACT	0.75374	20	40
AAAAACTGCCAAGAACCAGCGCAGGTGCTCCTCCGTTTCAACTGCGATGC	-2.21789	69	6
AAAAACTGCCGTTCATTCCTTCGCGAGTCCCAGAACAGATCGTGCATTAT	-0.180002	42	32
AAAAACTGCGACTGTGGGTGATTTTAACGACAACACCTCTTATAAGCTAT	-0.350627	16	10
AAAAACTGCGCGGCGTCGTAGGTGCGTTAGCCATGCCACTTAATGAATAG	-1.52475	24	4
AAAAACTGGAAGGCGGCGTTGACCCTAACTACGACACGCTTTTATTACAC	1.26009	70	229
AAAAACTGGCAGAATACTGCCCGAAGATAACAGGACTCACACGCACTCGC	-0.372734	78	49
AAAAACTGGTAATCCACATGGGGGGCTCATAATGACATGACAATGTCCAC	-0.497231	33	18
AAAAACTGGTACTACACCTTCATGCCCTGCCCAAACCGCCTTTAGATAGG	-1.66451	68	11
AAAAACTGTAACCTACGATGAAAGTGTTACTTATAGAATAACTAGTACGA	-1.52475	4	0
AAAAACTGTCCGTAATCCCGCACCCTGTCTTAACAAACGCAGTCGTGCAA	0.536676	41	65
AAAAACTGTCGCGGACGCGGCGCTTCCGTCGGCCCGAGAGCAGCCCACTC	-1.65443	73	12
AAAAACTGTTTGTGTTACCTCCAAGACCACGACACAAAGAGTTAACCCCT	1.02078	59	152
AAAAACTTAAATAACCACAAAGCAGTTTCGAAGAGTGCGGCGCGCTAACC	0.811739	57	119
AAAAACTTAACAGGAAACCATTGCAGGTTCTTTTCATAAAAGGTTCTACC	0.652675	33	59
AAAAACTTAAGAACTTTTTGAAGTTTGGCATGACATACGCAGGACCATCT	0.572394	34	56
AAAAACTTAAGCAGAACACTAAACAGTCCGGCCAAACTTGCGGAGTTCGT	0.267012	19	23
AAAAACTTATTTTACCGGGATATGAAAGAAACAGGAAGATTGACCTGTAG	-1.70707	11	1
AAAAACTTCATCATGTTGCGCGCCGTTACGGACAGTAGACCTGGGTCCAT	-0.435844	68	40
AAAAACTTCCCGCGGGGGCGGCGTCTTCCTACATGGCACGGCCAAGACCG	-1.70707	17	2
AAAAACTTGAAGCCCGGAACCTGGAATGTCGAAAACAAAGTGCTCGTTAT	-2.74852	16	0
AAAAACTTGCAGCTTTAACAACTACGCATTCCAACACATCCGCTGTGGGA	-0.233763	43	31
AAAAACTTGCTCACGGCGATGCCTACCAGTGGCGGTATAGGGACGGGAAC	-2.13993	36	3
AAAAACTTGGCCGCCTCCATCCCAGACGTTGGGCGATAATGAAATCGCAT	-0.608457	3	1
AAAAACTTTAAAACATCTGAGCTCCTTGGTAGGCCACCATGACAGTTGCA	-0.662524	18	8
AAAAACTTTATAATCCCGTGAGCCAAATGATCATAATTAGGACTAATCAT	-0.251782	13	9
AAAAACTTTGCGGGCCGGATGGCCCTACTACGTATACTCCATCGAAATTT	-0.385313	15	9
AAAAAGAAAACATTCAGAGAGATAGCCGAGACCCAACTAAAGCCATCATA	1.28866	5	19
AAAAAGAAACTCTTCGCGCGGGGCCTCCCTCCTCGAAGACGTCTTGTTTA	-2.21789	29	2
AAAAAGAAAGAGAAGCCATTTTCCGGCATAGCCCGGTACCAAGCAGCCGG	-0.875085	46	17
AAAAAGAAAGGAGCACCGAATTAGAAAAGTTCCCGGCCGAGGGAGGGGAA	-0.913838	18	6
AAAAAGAAATCCTAGCCCCGAACTTGATAGCTGCTCGATCTCGACCGCAT	0.322019	111	141
AAAAAGAAATGCATGGGGATCACATACTCAGCAGCCTTCCTAAGATAATA	-0.255177	58	41
AAAAAGAACACGTATAGGACGGGTGTTGCAGCTGCGGCCGCTCGGCAAAT	-0.868414	82	31
AAAAAGAACAGTTCTGGACGGTGGCAGTTTGTATCTCTCAATTGCCGATG	0.538608	46	73
AAAAAGAACATACTACACAAGAGACCAACGAGGATTTACGTGCCCGATGC	-0.372068	29	18
AAAAAGAACCTGTACTCTTACGTAAACAGCATCATACTTGTCGATCCCAA	-0.202991	3	2
AAAAAGAACGCGCTCGGCTACCATGGAAAAACATTGACTTTAACCATGAC	-1.99475	7	0
AAAAAGAACGGTTAGTGGGCTTGGAGTAGCCAGCTCTGATGAAGTCCCAC	-0.534349	25	13
AAAAAGAAGAAGAGTCGGCTACACACGATGCGGAATTTGTCTCAGTGGCA	-1.11527	82	24
AAAAAGAAGAATGCAGGCCCAATACCAGCCGAGTGAGAGGTTCACATCTT	-0.809127	21	8
AAAAAGAAGACAACCCCTTGACTTCCAATTTTAAAGAGGGGGCTTAAACG	-0.435185	36	21
AAAAAGAAGCTCTAGACTGGACGTGAACAGGGCAGCGCCGTCCCACACCA	-0.703767	32	14
AAAAAGAAGGACCTAAGCCACATTACTACCTCGTACTCTCCCGCGGGTCA	-1.09396	25	7
AAAAAGAAGTACCGTTTTGTAGCTCGACTATAGACAGCATATAACTTTTC	-0.8316	4	1
AAAAAGAAGTTGAAGCCAATCAAGCCAGACTGTGGTTCCCCGATTTTCCG	-0.812056	75	30
AAAAAGAATAGACACCATATGATCCTCCGCTGCGATGTAACTGTCGAGGA	-1.70707	5	0
AAAAAGACAACAACTCCTATGGTAACATGTAGTCCGTCGAACTGCATCCG	-1.27343	34	8
AAAAAGACACTGCATAAGTACAACGTCGAAAATGACGCATTACCAGTCAT	-2.48026	12	0
AAAAAGACAGAAACGTAGACACCTTCAGCTTACTCAACGCCCCCTACCCT	0.00772955	26	24
AAAAAGACATCCAACTAACGGCACAGAATGAAGGCGGGGTGGGACTTATG	-0.965132	59	20
AAAAAGACATTAGATGTGACGTATACATCAAGATATCCTCCTCATATGCA	-1.90774	87	11
AAAAAGACATTCGGATAGTACCCGTTCTGTCTCTTCGAAACACTTGATTT	0.290543	34	42
AAAAAGACATTGGCATTCTCCACGTCTTCGATGCGCCCCCTGCCGATAAC	-2.11253	17	1
AAAAAGACCACAAAATAATCGTGTACAAAAAAATTTGGTAACGTCGAAGA	1.93529	43	279
AAAAAGACCACCTCATCGCCAGAACTTCGGATTGCCCAAAGTGCCATAGT	0.868085	89	196
AAAAAGACCCGGTCTACGAACCCTCGGGACCATGTTGGACCTCACCCGCT	-0.752706	66	28
AAAAAGACCGGGTTCTTAAATTTTCATTACGAGAGTTCTCTGCTCGTGGT	-2.55437	27	1
AAAAAGACCTTCCCTCCTGCGAAATTACGTAGGATCTGATTGTGTAGCCA	-0.0106196	21	19
AAAAAGACGAATATAGCAGATATAACTCGTATCTTAACTGCATCCCTGAA	1.77571	39	216
AAAAAGACGATTCTAACCTAACCGAGTGGCTTCTAGCGCATTGTGCCAGC	0.792726	99	202
AAAAAGACGCTATACGAGTGAAGCCGACGGCGAAGTTAGGGGTAACCTTT	-0.097631	5	4
AAAAAGACGGATCCGAAATAAAAGGCCAGTGGAAGAACTAAGGCACCGAC	0.777838	126	253
AAAAAGACGTGAGCTATCCCGATGATAGCTCCGTACACCAGATCCTCGAC	-1.19932	64	17
AAAAAGACTAAAGAGCCCAGCACTAAACGCTCCCAACATCAGTAGTAGAA	1.00098	11	29
AAAAAGACTAATCTCTGAATTGGAAATACCCAATGAGTATCCCTGACTTG	1.66288	25	125
AAAAAGACTACACGGATAGAGCCTCTATCTCTTGTAATCACCGCGCGATC	-0.357142	13	8
AAAAAGACTAGGCCATGACTCAGACCATTGATAGCCGAAGGCCGTTTGTT	0.289485	21	26
AAAAAGACTGGGGAGTCTAATATGACTTTTTCTATTCCGGGTAGTTACAT	-0.762607	13	5
AAAAAGAGACTACGGTCCGACGCGTGACACTACCGGAGACATGTTAATGA	-0.219521	60	44
AAAAAGAGAGAGCTGAGCATCAGCCACTAGGATAAGGCCTAAGTTAACAG	0.238841	35	41
AAAAAGAGATGCAGGAGTTTTTTTTGCCGGGGCAGCCCTAAGCGTTTTGC	-1.52475	4	0
AAAAAGAGCCGACTTATAAGACACTTCACTTCTCCGGCCCGTAGATGAAG	-0.103362	34	28
AAAAAGAGGACAGAAAAGGGTCGGTATGTGCCAGCGGCAGTATGGACTTA	-2.07479	77	8
AAAAAGAGGATGGAATCCAAAGTCGACGTGCGCCGAGTAGAGTTTCAGGA	-0.93123	57	20
AAAAAGAGGGGACCCAATATGATCCGATATTCAAATAAGACCAGGCGAGC	-1.3016	19	4
AAAAAGAGTAAGTTGCGAATGAAAGTCACAATATTAGACTGTTAAATGAC	-1.86122	62	8
AAAAAGAGTCTTAGATGGCCCAAATATTAACAAAGGAACTCACACAATGA	-1.70707	59	9
AAAAAGAGTTTCCCCCTCTACCAAAAATACCACTACGATACGGTTGTTTC	-0.0550714	22	19
AAAAAGATAAAGCTTCAAGATTCCCACAGTTGCCTACGAACTAAAAGGTG	1.59798	23	108
AAAAAGATAACGCTGCGCGAGGAAAGCCGACCATAGCGTCTCAACTGCCA	-0.0843857	44	37
AAAAAGATACTTTGAAGCCGACGGACACAAAGTAGTCTTGTCGGAATGCT	-1.47345	18	3
AAAAAGATAGAAACCCTCAAACACAATAAGACAATGCGTATCTGGCTATA	-2.98336	42	1
AAAAAGATATTTGTTAAAATGCTAACATCGAAATCCAGTCCGGGGGGGTG	-0.780307	18	7
AAAAAGATCATTGGCAGAAACACCGGTACCAGCGATACGGAGATGTGAGT	-3.47066	34	0
AAAAAGATCCAGTGGATTCCTAGATCATTCGTACACCCTACATCGGCACC	0.925474	43	101
AAAAAGATCCGATCACTCGACGGCCGAGCGGTAAAGAGCAGCTTGGTAAC	-0.189746	49	37
AAAAAGATCGCAAGAACTCCCTAAATTAGGACATAGAACTATGAGTGCCG	-0.843296	42	16
AAAAAGATCTTGACCTGCTTTAAACAGCCAGACCAACCTAGCAAAGATGC	-0.92295	62	22
AAAAAGATGAACTACCGTAAAGCTTATGACACACGCCGCCCCTTTCATTT	-0.106365	45	37
AAAAAGATTAACACAACTCGCCGAAGTCCCCAAAGAATGGCATTCGAACC	-1.72542	54	8
AAAAAGATTCAACCGGCACATGAATATGCTGGATACGTGGCGCGGCTGTT	-0.969071	108	37
AAAAAGATTCTTATAGTTCTATCTCTTTGACAAATCGCAGGTATGAACAC	-1.55292	35	6
AAAAAGATTGCAGCGTTGAACGCACATATATCGTGGAGACGTACCAGACC	0.454438	37	54
AAAAAGATTGTCGTATCGCGCTCCAGCCTCGGAAACCGTCGGAAAGATAC	-0.00232079	11	10
AAAAAGATTTGGCTCAGGGTGCAGTTAGGGGATACAAGTAGCATGGCAGT	-0.978204	54	18
AAAAAGCAAACAACCCACCATCTGGTAGACCGGATCTATTGTGTTCAGAC	0.650683	66	117
AAAAAGCAAACGAAACTCCCCCGAAACGACATTAAGAACCTCCAAGAGAG	0.504544	22	34
AAAAAGCAACCGAACGCTAGAGCCCAGCTGAACACAGCCTTTATCGCTCA	-0.199078	84	63
AAAAAGCAACCTTAGTCCTAACTTGCTTTGACGTCAACTCTTTGGGTGGG	-0.320775	80	53
AAAAAGCAAGCACCTCTAACAAATGCTCGGACGATTGCTTGAGCTGGAGG	-0.866286	43	16
AAAAAGCAAGTCAGACAAACCGATTCATTGCGTAGGACTCCATGCGTCCC	1.99834	26	182
AAAAAGCAATCCACCTCGACTCCAAATAGTAAAAAGCAGCCGGGCAACAC	-0.138453	34	27
AAAAAGCACCGAAACAGTATGGCACACCGACACACAAATCCGCTTTGAGT	-1.38713	60	13
AAAAAGCACCGGTAATTAGTGCTCTCAGATCTAATTACTACGGAAGACGG	1.28649	45	152
AAAAAGCACGCCATGACCCAGCTCTTAGGAAAAGCAAGCGGTCCAAGCAT	-1.86122	13	1
AAAAAGCACTAACGTACAGACAGATTGCGTGACTCGACTTCGCCGGACAC	0.719342	43	82
AAAAAGCACTCTTCGTAACCACCGCGCCCTGTATAGAGACTCCCATTTCT	-0.565897	22	11
AAAAAGCACTGTGCACAACGTGCCTCTTATCATCGCGGTTTCTATAAAGT	0.886571	147	329
AAAAAGCACTTGCGCTTGCCGGGTGCCCCACAAGAGAACGCGTATTCGGA	1.16044	58	172
AAAAAGCAGACCAGTACATGCAAGACTGTCGGGGATGCCAATTCTAGTCG	-0.703767	10	4
AAAAAGCAGGCCTTCCAAACACCACCCCCCTGCCCTGGTGTCGAGTACTG	0.121058	26	27
AAAAAGCAGGCTTTTGAGTATTCGGAGGCGATGTGTGCGCCCAATATTTA	-2.55437	13	0
AAAAAGCAGGGTGATTACAAGTGTAACACTTCCGTGCTACTGAAAGTAAT	1.38018	71	262
AAAAAGCAGGTCCTCAATACTTGGAAAACCAGAGACTTGACTCGCACGGA	0.1327	60	63
AAAAAGCAGTCTAAATACGGCGAATTACAGTTATTCATTAGCACGCGTCC	1.60167	76	350
AAAAAGCAGTCTCGTCCCCAGTAAAGAGGCCACGGAACTCTTAGTTAGCA	0.759819	27	54
AAAAAGCATATGTTAGTGCGAGCCGGCCCTCGTTTGGTCTGCCCAGGCAA	-1.42944	99	21
AAAAAGCATTAGGTCTTATGTACAAAGCTAGCCCACAGTGATTGTTACCT	-1.11928	79	23
AAAAAGCATTGCTAAAACGCCTAAGACTTTGGGACGAGGCGTAGACGGTA	-0.561937	20	10
AAAAAGCATTTAATTCCAGCAAACTAAATCTTCACGTTAAGCCATCGAAT	0.241533	52	61
AAAAAGCCAAAGTCAAACCAAGCTACAGAACCTGCGACATCGCAATCCTC	1.76849	56	306
AAAAAGCCACGCCCAGTCACTATAGCCTATATGCCTGAGGGATGCCCGGT	-3.0508	22	0
AAAAAGCCAGTTTAAGTTTGCTCTATATACGATTTGGACCTTGACGCCCT	0.690826	5	10
AAAAAGCCATAGAACCGGAAACGGACAGATACGGTTCCCGATCAGGCAGG	1.4382	61	239
AAAAAGCCCAAAAACGAGGGTTAATTGACTTCCCTCAGCTCCAATGATGT	-0.426135	19	11
AAAAAGCCCAAATACGCCGGCGGTCTTTTAAACGGCAACTACGGCACACT	0.9176	9	22
AAAAAGCCCAATCAGGCCGAGCCTTGTGAAACACCCGGAACCAATGAGTC	-0.853579	45	17
AAAAAGCCCACAGCACTAGGAAATGACCTGTGGCATTAAACACAACAGGT	-1.3016	7	1
AAAAAGCCCCTTATTCAATATCGGCACGAGGCGGGCAAATTACGTTCTTT	-0.646197	107	51
AAAAAGCCCGTAACCGGATAATTCGCCACGAGGCAGTCACTAAACAACAA	0.968192	30	74
AAAAAGCCGACTCCTCACTATCCTACCCTAGTTGTCAGCTAAAAGAGTGG	-0.72624	26	11
AAAAAGCCGGGTAAGGGGGATATCTACGGCCCTTATTCGTAACGCGACCC	-0.0488408	15	13
AAAAAGCCGTAGTGCGAACTCAATCCGCAGTGTAAAGACAACAAGGAATA	1.18052	119	358
AAAAAGCCGTTCCTAGTGCCTCCAACGCCACGCGAAACAACGGCTAATAC	0.192904	34	38
AAAAAGCCGTTTGTGATCCATCCACGTAATATTGAGCATGAACTTCAATT	-1.75359	43	6
AAAAAGCCTATATTGCGCGTATCAAAAACTACTAATGAATGCGAAGAAAT	-1.4447	59	12
AAAAAGCCTCGAAGACGCAACTGTTCGCTGATTGGGCACAGTGAGAGGTA	0.00464788	25	23
AAAAAGCGAAGACGACCGGACCCATAACCATTAACCACCACAGGTTTGTC	-0.652908	22	10
AAAAAGCGACCGAATGCCTCGTTTTGTGAATGCATCTTAAACATGATCTT	-1.86122	34	4
AAAAAGCGACGCACTACCCATCGTATTCGGGGCTCTTTGCTACGATATTA	-1.38713	60	13
AAAAAGCGACGCCCAAATAAGTGCCGTATAGGACCTCTACTGTCCGCCAG	-1.70707	29	4
AAAAAGCGCACGCTCTATTTTCGGTCGCCGGTTCCACGAAATCAGTAAGC	0.421163	39	55
AAAAAGCGCCAACGAATGAATTAGCCATCTCCCTACCGCATACTCCCCTA	-1.41939	53	11
AAAAAGCGCCGCTCATCAATAAACCGCTCCTAAAAAGATGTCTCCAGCCT	-1.1317	26	7
AAAAAGCGCGCCCCTCAGACATTCTTCCGACGGCATAGGTAAAACCCCAT	0.554694	24	39
AAAAAGCGCTACGTGTGGAACGATCATAAATATGCTACCCATAATCTGCC	-2.19769	48	4
AAAAAGCGGACTTATAGTGGGGGATATCCCCACTATGGCGATACCAACAA	-1.4388	77	16
AAAAAGCGGGAACGAGGGCCAAGACCTGACCGAGCGGCAGCTGGAACCCA	-0.237393	68	49
AAAAAGCGGGGCCGCTTGCGGCGGACATTAGGCATAACTACCCTTGATAC	-1.35039	20	4
AAAAAGCGGTCACAACTTGTCGCTATGCAATCGACAATTCCGGGTACAAT	-0.790778	35	14
AAAAAGCGGTTCGTAAATCTGCGGACGAAGGAGATCCGGCAGGCACGATG	2.04579	27	198
AAAAAGCGTATTATTGCAAGAGCAGCTCGGAAACCCCCATATAGCAACCA	0.129142	21	22
AAAAAGCGTCTAAATTTTAACATTGACGCGTGACAATTTATGAATAACGA	1.06552	23	63
AAAAAGCGTGCACTTAACCCTCCCGGAGGCCCCTGGTGAATACCCTTATC	-0.367295	10	6
AAAAAGCGTTTGGAGATTCAACACATGGTTTCCTTGAAGACTCATCTTAA	-2.44104	24	1
AAAAAGCTAACGAAGCAGATTGGATCGACCGGGCTCTTTAGCAGATCTTT	-1.15702	44	12
AAAAAGCTAACTGATGGCGGGCCCAATTCCCTCACCTCACGGGTAAACGA	-3.07231	46	1
AAAAAGCTAGAAATGATGAAAAGCACTTTCCTGCATGCGGTGATACGCCG	-1.49085	57	11
AAAAAGCTAGGCCTCTGCAAGGGCCGTACGCTAAACTGAATACATAACCC	-1.1264	93	27
AAAAAGCTATACCCTTGTGTTGTCTACGGAGTCCGTTTGACAAAGGCGAG	0.40893	46	64
AAAAAGCTCACACCACTCCTATACCACGCCGCCTTCTAGTATTTTCCGGA	0.618331	77	132
AAAAAGCTCCGCTGTTGCTCCGTACATCGTTTCGTAGGACAACCGACCTT	-0.741988	47	20
AAAAAGCTCGACTAAAGTGATCAGTTTGCCCAAGAAATAGGGTAGTAAGG	0.901452	18	42
AAAAAGCTCGCATACTTGGAACAGGTCACGGTGGCACTTAATCGATTCAA	1.24543	25	82
AAAAAGCTCGTTGTATCAGAGCATACGCAATGGTGACCATTTCTGGGGCC	-1.52475	14	2
AAAAAGCTCTAAGGCGGCACCGGGCATCCTCTAAGACGGAATGACTCCCT	-1.5064	161	32
AAAAAGCTGTATTTGAGTGCTAGATGCCCTGCGTAGACATTGAGGAAACA	0.060593	41	40
AAAAAGCTTAATAAGTGTCTCGCTGGAAGACCCGCCTAAAGCTAATTTAA	1.33745	17	62
AAAAAGCTTCACGCGGCTGTAAAATACCCAAATACTTATTTGAGGGAAGG	0.202474	15	17
AAAAAGCTTGACCCTTATGAAGTGAACGCTGTCCTCTGAAACACATCACA	-2.11253	53	5
AAAAAGCTTGCTAAATCCTTTTCGTTCTATACCGTCGGAACAAAAAGCTT	0.0454699	51	49
AAAAAGCTTGGATTAGATGCCGTTCATAATGCTACGTCCAAATACCCGAC	-0.495128	24	13
AAAAAGGAAACAATAATTGGACGCTGCTGTCCTGCATCACAAGCCGAAAA	-0.0459296	48	42
AAAAAGGAACCCCCACGTCAGTGCGAACCTCGCAAATGTTTTCATGACAA	-1.86122	41	5
AAAAAGGACAAGATACACATTTCAACCCAGCCCGAAGTCCGGTGCTCAAT	0.913383	30	70
AAAAAGGACAGTGGTTCCTGGAGTACATGATAAAGAAGTCACTTAATAAT	1.65591	15	76
AAAAAGGACATCTTAGGAGTGCACACGTCTACGTGTTGAACAGAAAGATA	1.36989	77	281
AAAAAGGACCCTGCTCAAACCTCGAAGTTAGGCTTCTAAACCCCCTCGAC	0.728241	30	58
AAAAAGGACGGACCTTGTTGGGTGTGCTCGTGGTGCAGAGATGGCGCGGA	-1.86122	76	10
AAAAAGGACTGAGCTCCGAACCCTTCCATGTGCCCCTGGTGTGAAACGAG	-1.89631	28	3
AAAAAGGACTGATGCTCTCTAAGGTAACAAGTGCCAGAGCTGACTACACC	1.11319	127	357
AAAAAGGATACCCGAGCCCAAAAGCATCTTATCGTAACGATGATAGGATT	-1.99475	47	5
AAAAAGGATTGGCCGCCCCTCCCTAACCCTCAGACAATTCTTATCAGTCG	0.554694	9	15
AAAAAGGCACGAGGCAGGCGCAGGTAAGGTGCCTGATTGACCTTATCCCA	-0.294799	75	51
AAAAAGGCCAAGAATTTCCTTCTAACTAAGAATGAGACTACGTGCTTCCG	-2.17967	76	7
AAAAAGGCCCACTGCCTCAGACGAATGACATCGAATCAAAGATCAGATTC	-1.68109	75	12
AAAAAGGCCGGGGCCACTAACGCAACTGGACGCTCCCTGGGACTAACTTA	-1.24218	48	12
AAAAAGGCCTGCAAAACCCTATCCCAGGGATAGACGTCGAGGCAGAGATA	-0.320775	32	21
AAAAAGGCGGCGGCCAATCGGCATAGTTCGCTGACACCGCGGATCGGCCC	-0.753639	36	15
AAAAAGGCGTTAGCCGGGATACTAACTCCATTCTAGTGAGCCTTCTAAAG	0.678992	84	153
AAAAAGGCTAAAGATTTACAGTAAAACTCTTTCGAACTACCAACATTCAT	1.23737	53	170
AAAAAGGCTAACCCGCTCGCTACTAACAGTTTATTAATAACGCGTTTGAC	1.87922	59	360
AAAAAGGCTACCTACCTCGCCGAGGTAGCATTGCCACAGAAGTTACTCAG	-1.13581	60	17
AAAAAGGCTCCCAAGTATTATTAAACAGACTCCGCGATTTTGTAAGTGGC	-0.173139	21	16
AAAAAGGCTGTGCTCAGATCAGCCGCAGCGTTGAATCTGTGTCCTAAAGG	-0.0206699	9	8
AAAAAGGGAAAAATCCGAGCGACGAACTACCACCAAAATGCCCTGCCATG	-1.2275	51	13
AAAAAGGGAACCACAGTCTAGGTTTAAAGCTGCTACATGAAAGTGACCAA	0.231294	18	21
AAAAAGGGACATATCGGACCACCGATAGACACTAATGCACTCCAAATACG	-1.57786	57	10
AAAAAGGGACTACTCAACCATAGCGGAAAGCCGCCACCTCAATTCACGCA	-0.565897	45	23
AAAAAGGGCAGACTAATGATTTGCTTAACATGGCTAAGACCCCCAATATA	-0.637444	69	33
AAAAAGGGCGCGCAGTAGCTCCCGGTGGACCGGACGACCAGTCTGCGAAT	-2.11253	8	0
AAAAAGGGGGAATGAAAGATTAGCGAATATAGTGACGTCGCAGGGTCGGC	-0.486567	107	60
AAAAAGGGGGCTTATGAGGGCTCAGACCCCACATCTGAGCGATTGATCAA	-1.90774	21	2
AAAAAGGGTAAAATTCGTGAAGTGTGACAGTTCACCCCCTCCGGGGAACT	-1.09396	25	7
AAAAAGGGTGTAGTGATTCCTAGTAGTCGCAAACCCGGAATAAACAATGA	-1.90774	21	2
AAAAAGGTATGCGGACATTCACGGCCGCATCACCCTTCCTTGAAGACTCC	-1.18098	38	10
AAAAAGGTCCGACTTCGATATTATGGAAAAGTCCTGAAAGGCCCGCAGCC	-1.26986	30	7
AAAAAGGTCCGGAAACGTCCCCATGTCTCGCTCTTTGCATTTGGCTATAA	-0.713817	39	17
AAAAAGGTGAGTGCTCTCTACACCTCTCCGTACACCGGTGACTCGGATAT	-1.34606	45	10
AAAAAGGTGTTTTCCTTAGTCCGGGTTGCACCAAAGCGCCTCTCGGTGGA	-0.859771	17	6
AAAAAGGTTCGGACAAGAGAATAAATTAATAGGTGCATAGCAATGCTTAC	-1.77161	31	4
AAAAAGTAAAATTTCGAAGAGCTCCACTGACCATATAAATAGTCATGGCG	0.390072	55	75
AAAAAGTAAATACAGGAACACAAATGCCAATTGGAGTACTGCACAGCCTA	-1.8432	54	7
AAAAAGTAACAATGATTCACCCCGGTCGTGGAAAACACCAGGCCTGCGCA	0.0557031	69	67
AAAAAGTAAGTCTTTACATAAGAATCGAGATGATGATACAAATTCAGTTC	2.1949	3	32
AAAAAGTAAGTTGCAAGTCCCGCGAATCCCCACCATCATGCACAACTAAG	-1.22523	62	16
AAAAAGTAAGTTTTGAGACCTTCCGACCGAAACGCACATCCAACTGTCAA	-1.41939	8	1
AAAAAGTAATAACTGGATCATTACAGCCATTTGAATCGCGACTGTAAATA	1.12193	27	78
AAAAAGTAATGCGCAACAAGGCCCTTCCGTAATCTAGGACAGGGTCATTG	-0.846868	32	12
AAAAAGTAATTCATGCCTTGTATAGACTCTGGGCCCCTGCACCCAGGCAC	-1.16807	6	1
AAAAAGTACCATATATTATCGAGCTGCAATGACGTTGTCTCTAGTATCGC	-2.3132	98	8
AAAAAGTACGACGACTAGTGCACACTATCGGGCTGCTATTTACTGATTCT	-0.965132	59	20
AAAAAGTACGATCGCTCGATGAGGTCACCCGAGACTGGTAACCTTTGAAG	-1.86122	90	12
AAAAAGTACGGGACCGTCCTTCAGCACATACGGCTCATTCGCGGGCACTG	-0.88471	28	10
AAAAAGTACTCGTACTCGTATCCTCATACAAGGACACGTAAGGAGAATTA	0.85869	94	205
AAAAAGTACTGCGTACACTTGCCCTCGTGTTCTTTCCCCGTTATCCTGGT	0.911369	48	111
AAAAAGTACTGTGCTGATTAGCAAAAATACCACCACCCTTAGGCGGTTTT	-0.394882	20	12
AAAAAGTAGGCTAAACATTATCCTCCCCCATGATAACTCCACTACCCCCA	0.562129	66	107
AAAAAGTAGGTCTGTGCTACTTGCCAGCGGTGTAGCGGAGTCCCGCCTAC	-0.88717	73	27
AAAAAGTATACGATGGGAAGGGGAGGCCTATGAGACACACGTCGTAATGC	0.0846906	1	1
AAAAAGTATGCGACGGGGATGGACTGGTCCCTCGCCCTGTAACCAAAGTG	-1.19624	107	29
AAAAAGTATGCTATAGTCAAGCGTAGGCAACACGCACAACGAGGCGGGCA	-1.10841	121	36
AAAAAGTCACATCTAGCCTAACTGTGTGACCTTCGATATATACTTATGTA	-1.78118	83	12
AAAAAGTCCAACGCCCCAAAATGCCATCATATCGAATCCACCGATCTTTA	-0.714837	108	48
AAAAAGTCCGCGATGGCTTAATGAAAGGTAATATTTGAACTGCTGATTGC	-1.16807	27	7
AAAAAGTCCGGATCCCGGTGGTCAAGCTACAGCAGTGAGAACCGCAGGAA	1.4446	47	186
AAAAAGTCCTTAACTCTCTGAGCTGACTAGGGCCGTTGGAATGGAGGTAT	-0.956763	16	5
AAAAAGTCGAAAGTTTCAGTCTTTGGCAATATATACTCACACGCACTCTT	0.490156	35	53
AAAAAGTCGGAGAGGGGCGGAGCCTATTCTATACCACACAATAGGCCATG	0.735278	11	22
AAAAAGTCTCGATGTGCGTCCAAGCGAGATCGCACCATGTTGAACCGTGG	-1.12272	96	28
AAAAAGTCTCGGCAATAAAGATTGCGAGACGGATCAATCCGGGTCACTCC	-0.320775	29	19
AAAAAGTCTCTCGACAGTTTTGGATATGTTATCATACGCTCCGTTCCTCG	-1.3016	3	0
AAAAAGTCTGGCCGGGTGGTCCATAAGTGTAATGTATAGTTACAACCGCC	-1.55292	35	6
AAAAAGTCTTGACCTGGCATACGCCCTCATACTCTATCGTTGCTGAAATC	0.436088	18	26
AAAAAGTGAAGGGCCCGATATATGAAATTTACCTATCAACTAATCGCGCA	0.536676	20	32
AAAAAGTGAAGTCGGAGACTTGGTTCACTCGTGCACGCTGAGTACTACCG	0.814205	26	55
AAAAAGTGACCTCAGTTAATTCACGGTGAAGAGTTTTGAGGGATGCGCGC	-2.62336	59	3
AAAAAGTGACGCCAGAGTCGTCTCCATTCCACTTCCCCTCTAAAAGACAT	-1.58929	63	11
AAAAAGTGATAAATGTTACCCGAAGCAAGCAAGACGATTTTCGACTACCC	-0.79276	100	41
AAAAAGTGATGACGTCCAACCAGGGGTGAGGCGCCTAAAATGTCTTAGGT	-0.672995	31	14
AAAAAGTGATTCAGTCACTTACTGGCAGTCATTGGCGGATAACGACCGGG	-0.320775	35	23
AAAAAGTGCATTAATCCGCCCGTGCAACAATGATTACTGTCCCGAGGGAT	1.19435	59	181
AAAAAGTGCCTATATCTAAGTAATATATACCTCCCGTCCGGTCCGGACGA	-1.39691	21	4
AAAAAGTGCGGGTGGGCCCTCGGCGTCTCCCTTGCAACGTTTATGCGTCA	-0.438558	26	15
AAAAAGTGCTGATCGATCGGGTCAATTGGTAAAAATTTTAGGAGATCCAC	1.50608	6	28
AAAAAGTGCTTGGAACAATACAGCATACGCACGTTACAAGCTAATCTGAA	1.06007	22	60
AAAAAGTGGCCTGATAAGTAGTAACTGCGCTTACGGGGGCGATTCCTTGT	-1.70707	59	9
AAAAAGTGTCCATGTGAAGCACACGCAACTCTGTCACCTACCGCCTACCA	-1.43514	95	20
AAAAAGTGTTGTTGGATGCGCTAGACCGGTCCGAACCCTGCTCCCACAAA	-1.25201	117	30
AAAAAGTTACATGATCCCAAACCCGGTGAAAAGACTCCGACACTTCCATA	-0.754411	80	34
AAAAAGTTATTCTGGAAGAATTTTCTTTAGTCCACGCGATTTAGCAGCTG	-0.173139	21	16
AAAAAGTTCAAAGGCTACGTCCCGGCCCTTATTCGCTCTATGCAGCGCCC	-2.1666	37	3
AAAAAGTTCAATCTTACTCTCGGTCCGGACCCACAATAAAATTCCAATAA	1.05088	42	112
AAAAAGTTCAGGATTGGTTCAATGCCAAGTCGGAAAGAAATTAATCCCCG	-1.15207	61	17
AAAAAGTTCGCGACCAAAGGAAGAGCGCCGTCCCCAATGATATACCTGCG	-1.6789	34	5
AAAAAGTTCGCTTGATGATTGCCACAGCAAACCGCTTCGTTGGGTTTAAC	0.702126	47	88
AAAAAGTTCGGAACTCTTCACTGTCAAGGCCTGTGTTGATCCCACAAAAC	0.452415	98	142
AAAAAGTTCTCCCATATCTTCAGATCACGCAGGTGCACTGGTAGTCGCTT	0.864849	10	23
AAAAAGTTCTCCGTTAGCCGGTTTGGAAACCGCACTGTGCGGAGCTATTA	-2.74852	16	0
AAAAAGTTGACACTGCAGGTCTCTCGTTGGCTGTAGAAAAATTAGTTCTT	0.267012	4	5
AAAAAGTTGGTCGTGATGCCTCAAGTATGGCGTACTAGTCGTTTTGCAAG	-2.65615	30	1
AAAAAGTTTATTCTTCCGGCTAATACATAACTTCATAAACGCACCGTCCC	0.145315	63	67
AAAAAGTTTCACGGCTATTGTGCAAGACGATCAGAACCCGACGGCCGATT	1.08012	50	137
AAAAAGTTTCACTTTATATCTTGATGACTCCCTCATCCATAGAACACATA	0.539427	32	51
AAAAAGTTTGACCCCATAGACTGTACCTATCCATTAAACTTTTACCGGTT	0.539427	32	51
AAAAATAAAAACCACATATCACGTCAACAATATCATACCAGCGGGATAAT	-0.308352	39	26
AAAAATAAAAGGGCTGCTTGACCCCAACACTAAGTAGACATAAGTCCAAT	1.43462	13	53
AAAAATAAACATCCCGAACCAACGATATGGCCAACGTATGTGTCTGGAGC	0.856481	54	118
AAAAATAAACTCCTGGTATTTGTTTGTTTGCTAATCTCGGCCTGTAAAGA	1.35473	40	145
AAAAATAAATGAAGAGAAGATCCACACCACAGGTCGCAGGAACTCCGATC	0.205319	38	43
AAAAATAAATTTATGGTTTAACAGTCTTTTAGCCCACTATAGAGGTCTGG	-0.608457	15	7
AAAAATAAATTTGTCTAGGGATGCGATGAAGTCCCTGTAAATGACCGCCG	-1.3016	23	5
AAAAATAACAATCTAACATGGGAAATCCATCCACGATAACGCGAATCTAA	-1.19866	82	22
AAAAATAACCGTTATCGCCCAAAAAAACTTGTCTACTCAGATACCCTCAA	0.267012	4	5
AAAAATAACCTGTATCCAGCTAAACTAGCGGGGTCCCCCCGGACAACCGT	-0.426135	4	2
AAAAATAACTACGTAGCCTCCCCAAATCTTTGTCTTCCCTGGTTTGGGCC	-0.751557	29	12
AAAAATAACTCATCAAGCAGGCACGCATTGAATTAAATGTCTGATGTAGT	-0.86439	61	23
AAAAATAAGGAGACATTGCGTCGGCAGCGCCCCACCGGACTACGCAGGAC	0.75252	39	77
AAAAATAAGGCCACTGGCGCTATACATTTGCGAGCATGTTTTGCCGATGT	-1.3367	28	6
AAAAATAAGGTTTTAAAGACAAAATGATGCACGTAGCTACAGGGCCTTAC	1.35766	6	24
AAAAATAAGTTCTGCCCGCATACGAACGTCCGCATTGCAGAGTGTCTTTA	0.39554	95	130
AAAAATAATACCACAAAGTAACAAACTAGACTGGATACTTCAATTCAACA	1.80234	76	428
AAAAATAATCGACCCAATGAAGAGGACCCGGCCCTATTTCAGCGAAACGG	-0.922114	51	18
AAAAATAATGTAACATTGAGCACAATAGGAAGTAACTAATAGCGATACTC	-1.70707	5	0
AAAAATAATTACATTTAAGCCTTATCTGCCTTCGTTTCGAATCCTTGTTA	0.828269	57	121
AAAAATAATTATATTGACCTCCACTCAACAGGGCGCGGAACGAAACATTG	0.352955	64	84
AAAAATAATTGGACAATATGACACGGAACATAACTTCGAGCCCCCGAAAA	0.12725	22	23
AAAAATACAAATGGACCGAAGCGGCGGCGATAACACCTGAACCTCAGACG	-1.01392	77	25
AAAAATACAAATGTTGAATGTTCCATCAACCGGCCACCACAAAAGAGTGT	-2.28243	31	2
AAAAATACAACCTCCTCTCGTTCGAATGTATTTAACAACGCGGCCAGTAC	-1.23707	59	15
AAAAATACAAGCCTATTGTTGTTCTGCATCTTTACGATAAAAGGACGAGA	1.29453	67	227
AAAAATACACGAAAAGGCGAGACCGATCTATGATGGTAGAAAAAACTAAA	1.38397	20	76
AAAAATACAGAGACCAGTGCAATTACTCCTATAATAAAGTGATGACCCAG	1.02673	22	58
AAAAATACATACATATTACAGCTCCACAGCCTCGTCACGAACCTATGATC	-0.608457	1	0
AAAAATACATCCAAGCCCTAACCTTGGCCGCAACAGCACCAAGCCGTTAC	-0.567635	47	24
AAAAATACATTAATCGCGGGAATTAGCAATCCTGCTTTAGAGTTCACTTA	-1.57354	20	3
AAAAATACCCATATCCGTCTGAACTACAGTCCTTACTCAGAATACTATCA	-0.145833	33	26
AAAAATACCGAGTATGAAGTCGTATATGTTCGTTTAAAAGCGACCCGTAG	-2.27616	52	4
AAAAATACCTATATGTCATTCGGGTGGTACTATTTTGTTGAAAATCCGCG	-1.65828	39	6
AAAAATACCTTGTCTGCCCGATGGGTCTTGATCTCCGAAATAAGCGGGCA	0.0982962	72	73
AAAAATACGAATGACCACAAAAGTATAGACCACCTGGGCGCACGCACGAG	-0.818177	36	14
AAAAATACGACGGTATTTGTACCCTAGCCCACTGGATCGCCTTAGAGCGC	-1.81243	59	8
AAAAATACGCACTATGGACAGATTATAAGTGTATGGAATGGCACATGACT	-0.608457	1	0
AAAAATACGGCCTTCAAGAACAGGTCCCGCTCAACTGAGTGCCCCTGTCA	-0.780307	37	15
AAAAATACTTGTAGCACTTCCCAATAAACATCCCGTAGTAGTCCGTTACA	0.990931	39	98
AAAAATACTTTGGCGCTACACAGATGGTCAGTTCGTAATTGCCCCCGCCC	-1.55754	30	5
AAAAATAGACAAGTATACTGGTCGTAACAATACGGCCGGCCCACTCTTCC	-0.630929	44	21
AAAAATAGACTTGAATTTTGCGCATACCAGCAATTACAGCTGATCCGACG	1.4213	97	372
AAAAATAGATCAACTCCGAACTAAAATTCGTTCTTGAGTGGGCACGCTAT	-0.608457	1	0
AAAAATAGCACAACGGACTTAAATAGCAAACTTGACCGGACGATCACTCT	-0.258254	61	43
AAAAATAGCCGAGCCCTGAAAAGTCGAACTTGCCAGACCGCGATTTACCC	1.30847	44	152
AAAAATAGCGAAGGACTGGAGAGATCATTCGCATTCGGGACATTCCTGGG	-0.225464	14	10
AAAAATAGCGCAACGAGGGGCCTTTAGGTCAATGTACGAATAAGTTACGT	-1.58032	73	13
AAAAATAGCTATAAGAAGACACTATCTCGCACCAAATAAGGTAACACGAA	0.490156	9	14
AAAAATAGGCCAATCACTTGCAACACGCTTTGGCCCTTCTCAATCTTGCC	-0.608457	41	20
AAAAATAGGCGACCGGTACTGTAAGAGTTCTAGCACACTAAGTACAACTA	0.372373	14	19
AAAAATAGTAATACTCTGAATTGGGCAGAGCCGTTCCTATTATATACGAG	-1.39691	21	4
AAAAATAGTCCACGGGAATAACCAGCTATAACTAGATCTTGGAAATGGAC	0.490156	1	2
AAAAATAGTCCTCAACCCTTCCCGATTTTCATGTGCATGACATGAAAGCG	-0.372068	29	18
AAAAATAGTCTCGGTCAGTTGAAGTATTCTATTCAGCCCTGCACTTGCCC	-1.3016	15	3
AAAAATAGTTGAGTTGATAGAACGACGCTCGAACTTACTCTAGAAAATAC	0.981437	30	75
AAAAATAGTTGCATCTAAGAGCCCAGGCAACTTACAGACAAAGCAAGCTG	0.873148	49	109
AAAAATATAAAAGGCAAAGCTAGACACTTCGTCGTATAAGCCCCGAAACC	1.92722	31	201
AAAAATATACATTCCGGACACGTACGATACGACACGACGAATGATGAGCA	-1.24754	71	18
AAAAATATACCCAAACGCAATGCCTCATGCCTGCGCAGTAGTCACATAAT	-1.94963	129	16
AAAAATATACTAAGTTCTCATGACGGAAAGTCACAAACACGTTACATACT	-0.872843	98	37
AAAAATATACTTAAGGGCGAACAGAAGAGATGCCTTAGCACCAAGGTCCT	-1.16807	27	7
AAAAATATACTTCAAGTCACCCATTGTGGGAAAGCCCAAAGCGTGTGGAT	-2.21789	39	3
AAAAATATATCGCGCAACCCCTCTTAGAGAGCCATACCGATCCTGCGGTT	1.02915	20	53
AAAAATATCAAAAGCAACATACTCGATCACTGTTCCCACTTGACCCTGGC	-0.510017	57	31
AAAAATATCAGCGGACATCAAAGTGAGCCAGAACGCATGGAATCTATCCA	-0.333514	78	51
AAAAATATCCAGGGCCCCGCATGCGCATCAGGCCTCAAGTCGTGTCGAAC	-0.0459296	48	42
AAAAATATCCGTAGACTAATAGTGAGAAGCCGGACATGAAGGGTAAAGCC	1.2582	29	96
AAAAATATCCTATAAAAACGCACTTATCTGACTTTCAATACACGTATGGT	0.473349	79	117
AAAAATATCTAAATTCCGCGGGGTGGCCTGGTTTCGCCTATCATTCGGGG	-0.553397	52	27
AAAAATATCTACCGTCAGTTGTCCGGCAAGGGCAGCGCTGTAAGTGCTAT	-2.48026	51	3
AAAAATATGAGAACTCCCCCATAACTGTCAGCTCGAGCTTGAAATCTATA	-0.220691	37	27
AAAAATATGATCTCACGAAAACCGAGGGTTGCACCGCCGGCCGCACCGGC	-1.9737	46	5
AAAAATATGGGGTTCGTGGGACCCGGATACTACTATTACTACGTACTCAG	-1.52475	24	4
AAAAATATGTAGCACGGCTCCGTACTCGAAGGTAACAAACAAGTTCCAAA	-0.608457	57	28
AAAAATATTAAAAAAACCAGTTATTCAGGAATAACTTGTCCCGGTATGGC	-2.518	26	1
AAAAATATTAAATTTGATACGCGAGGGATGCGCCTTATAGGAGACCGCCA	-1.3016	27	6
AAAAATATTACATAGGATGGTTGTGTTCGTCAACTCCTACGCAGCGGGTA	-0.350627	16	10
AAAAATATTAGCCAGGCATCCTCATTCCAATAGACCAGCCCTATACCTTG	-0.551298	16	8
AAAAATATTCCCACGCTTTTGTGACAAGAAAAGCCCCCTGAAAGCTATCC	0.656477	34	61
AAAAATATTCTTATCCACGAACCACAGTGCCTGGCCGGTAACGTAATTCG	-0.263616	67	47
AAAAATATTGAGAAAACTTATCGGGGCCCAAAAAGTGGTCACACTTTCCA	-0.266707	26	18
AAAAATCAAAACGGACCTCCACGCACGACAGCTTAGGCTCGGCGGTAACA	-0.712597	90	40
AAAAATCAACTCTACCTCTTACCACGAAGGCATTGTCTATAATTTAATGC	-0.628259	50	24
AAAAATCAATGGAACCCTGGGGGGACGAGGGAAGGCGAGTGAAAATGGGT	-1.52475	49	9
AAAAATCACATATTAGTATCGTCCAATAAAAGCGTTATTGGTGCAGCTAT	0.764232	36	72
AAAAATCACGCGGATGAATCGTTACGAAACAGACCACCCCGATAGACAAA	0.777838	8	17
AAAAATCACGGCGGCGTAGTCTAGAACCGGCTGCACATGAAGTAACCCGT	-2.06707	42	4
AAAAATCACGTACGGACTGTATTACGATCCCTGCCCGTGCCTACGCTAAC	-0.450828	81	47
AAAAATCACGTCAACCTCGGAAAAAATGCGCGAACGTGACAGGCATATTC	-2.65615	30	1
AAAAATCACTAGACCAAGCGGTGTGTCCGGATCAGTTAACACCTTACGAT	1.07976	60	164
AAAAATCACTGTCAGAATACAGCCATCTCCCTGACTGAATCCGTACCCTA	0.490156	31	47
AAAAATCAGATCTGGTTGCAATCAACTTCATGTGTAGCGTGCCGGAACCG	0.844529	28	61
AAAAATCAGCCAATTCTCTCTTAGCGACCTGCGAGAATCTTAAGACTGGG	0.628992	46	80
AAAAATCAGCGAACACGGGGATTCAAGGTATTCCCGCACCGGCGCGGTGC	-1.06393	40	12
AAAAATCAGCGTTACGCTTGATAACGAAACTGGCCCACGACCCCGGATAA	0.197169	41	46
AAAAATCATAATGCATGCAGTAGAAAACGCGCGGAGCAGTCTTTAGCCGG	-0.790778	11	4
AAAAATCATACATGCCAATCTAATGTCACATCTATTAAAAGCATTCAAGG	-1.6457	78	13
AAAAATCATACCAGCCGCTAGAGCACCCCTATCCGAAGGCGAGAACATAT	0.490156	1	2
AAAAATCATATACGAAGCCATCCAGCTTGTTGATGTCCGTCCCATTCTTA	0.777838	45	91
AAAAATCATATCGAATACCTGATATTGGCTTCTATAAACATTTTTATGGT	1.53998	13	59
AAAAATCATCGCTATCAACAATTATCTCGTTCGTATACTTCAAGATGCCA	1.81339	59	337
AAAAATCATGAAATTGAACTGACAACAACGAGCGAACTGATCGCGAGGTC	-1.39958	74	16
AAAAATCATGCACTTTGGGACTCGATAGAACGATCCTGCGCCCGTACAAA	-0.709261	72	32
AAAAATCATGCAGTGCAGTTGGCTATCAGGTGTTTCCACCCCCGGTACTG	-1.44137	68	14
AAAAATCATGGCACTGACTTACCATACCCCCCGAACGCGGTACTTATCTC	-0.947672	72	25
AAAAATCATTCCATCCTCCTGCCCTTGAGCCAACACATGAGAAAGAACGC	-1.39691	43	9
AAAAATCATTGTTTGCAAGCAGCGTTCTTATCATCTAAGACTCGGCTGTT	1.33194	51	180
AAAAATCCAAAGGCGTAGCACACGTCGAACAGGGAGCGACAAAGATCGCT	0.59959	48	81
AAAAATCCACCTATCAACCCCGCTGTACGTGACAATTGGGCCTTAAGGTT	-0.202991	23	17
AAAAATCCAGAACGTGTGTTCGGGTATGCTCTTGGTGACGTCGCACACAA	-1.78711	12	1
AAAAATCCAGAGCGGCGTACCTCCCGACATCTCTGTTCACTCAACTCCGG	-1.01392	2	0
AAAAATCCAGTACAGTCGACGTGCCGACACCCTTCAATACTATCACGTCT	0.688607	40	74
AAAAATCCATAGATAATAACGCGTCAACAACGGGATACGAGTATCTTTAC	-0.522934	111	60
AAAAATCCATGACTGTTCTCTGCCTTTATAGCAGGTCCTCCTTTTCTAGA	0.777838	4	9
AAAAATCCATGGCCGAGTTTACCCCCTAACGACAGAGCAGTCGGTCTTGA	-1.64455	61	10
AAAAATCCATTTGTCTTTACATGAATGTTCATATGAGTAATAGCCGTGTA	1.45157	25	101
AAAAATCCCACTGGCAACCGCGTGTACAGTACATAGCCAGTCAAATTCCC	0.530002	40	63
AAAAATCCCAGCTAGGGAGTGCATCGGTCCAACCTCCGCACTCCACCACA	-0.426135	24	14
AAAAATCCCAGGGCCAAACAAATTATTTCACGCACTCGGCCTGGCACTAT	-0.817211	68	27
AAAAATCCCCAGTAGGGATAGGAAGTGCTAAGCATGTAACAGTCTCAAAC	-1.20629	39	10
AAAAATCCCCTCTTGGAGGAACTTCGTCAAGCCGAACATATACTCGTGAC	1.28123	80	267
AAAAATCCCCTGGTAGCGACGCACGCTACTTAGAAGCCGGGGTATGAAGG	-3.49883	35	0
AAAAATCCCCTTTGATGATATCACTAAACCTAGTCTACAGGCTTGAGAGC	-0.870821	38	14
AAAAATCCCTAAGCTGTAATTCGGTGGTCTGTTGCGTCATAGTACGGCCG	-1.8432	54	7
AAAAATCCCTCCGACGATAAGATTTACACGTTTTAACCGTGATCCTTTTG	1.71461	28	147
AAAAATCCCTCGATAAGCATTACATGAGGCGGAACAGATGTTGACAGGAA	-0.88039	20	7
AAAAATCCGAAGGCTGCATGGACCCGTGCAGATAAAATTATCCAATGTTC	-0.465356	25	14
AAAAATCCGACCTCTAAGGACTAATTTCCAGCGTTCGAATCGCATGAACG	1.34339	47	168
AAAAATCCGCCACCTTACAAAGCCTCAGGCCATACCTAAAGCACGCGACT	0.813943	67	140
AAAAATCCGGCTCTAGGTAATATGGCTAGGTGGATTCTAGCTATTGCCCT	-1.09396	12	3
AAAAATCCGGTCGACTAATTACCTCTGGGACCTCATATCCACATACACTC	0.651797	37	66
AAAAATCCGGTGACAACTCCGCAATAAATTAGGTCGTTCTTTCGTAAGCC	-0.348173	36	23
AAAAATCCTAAATATCCAGATATGCTGCCCGGTAAGGAACCGGCATCAAC	-1.63808	27	4
AAAAATCCTACCAGGTCCCAATCCGACAGCCTGATCTGGTCAAGCATGCG	-2.74852	16	0
AAAAATCCTCGAAGACTAACCATCGGATGACTTACATGGGAGTGACTCCC	-0.506674	55	30
AAAAATCCTCGGCATCAACTGGCGACTTAAAATTCCGGGGGTTACTATTG	-0.745658	38	16
AAAAATCCTGACACACTGGTCGGGACGTAATAAGCAAGTCAACAATCGTT	-1.3016	3	0
AAAAATCCTGCAACTAGTACACATCGGACGAAGCTTGAGAACGCCCCTCG	1.11876	95	269
AAAAATCCTTGAAGCCCCCTGGCGCAACTATTAAATATCCCTTTTAGAAC	1.74292	15	83
AAAAATCGAACGAACAGCGCCACCATGTCGGGCTCAGAACGCAATATCCT	-1.41939	53	11
AAAAATCGAAGGTGGACCTAGTATCTAACCTATTCCTCACAGAAACTATG	0.338925	37	48
AAAAATCGAGACATGGACGCACTAAGTTTCCCCAACACGTAGCAGATCCA	-1.32222	48	11
AAAAATCGAGCCTGACGCAGATCTTGCTGTGGCATAACAAGAATCACTGG	0.745048	30	59
AAAAATCGAGGTGACGCCGAGACTGCCGGTTGGATAATAGTAATAACGTT	-0.244789	56	40
AAAAATCGCAAACTGTAATTACAAGGTAAAGCCCGGCGAACACGGGATCT	-0.242522	42	30
AAAAATCGCAAATTACCCGCCGGTCGAGACCAAACCAGGACGTAGCATCA	0.0846906	2	2
AAAAATCGCATATGTGTGGCCGTCATTCTGCCTCATTTCGGAATCTTGCA	-1.02666	78	25
AAAAATCGCCAAACAATCCTCTACGTTCTCAATCCCTGACGGCTTAAGGT	1.24046	84	269
AAAAATCGCGAGCGAGATCAATTGCCCAGTAACATTGCATCCAGAATACG	0.568488	44	72
AAAAATCGGCGTCCCGGGCCCCGTAGTGTAACATATCACCAAGTCAACAG	0.340624	47	61
AAAAATCGGCTGACAATTGGTTCCTTGAGTCGTAGTCTAGCACGACCGTT	-0.506987	102	56
AAAAATCGGTTTGTTTGGCGTGCTAAAAGCCTTCCCCGTAGACGATGCTG	0.171702	21	23
AAAAATCGTACATGGACAATCACCCCTGCGTCATATAGCACTCTCACTGG	-2.40022	11	0
AAAAATCGTCAGGGATGTTTCCTTCGGGTCGGAGGTTGTCCCCCACGATA	-1.70707	23	3
AAAAATCTACCATGGGCGAACTGCGTATTAGATCCTAGCTGAAGCCTCAC	-2.02552	98	11
AAAAATCTATGGGGCCATCGCTCCTGCGTCAGACTGCGGCATACACGGAT	-1.47928	42	8
AAAAATCTATTAACAACTCGCGATTCGCGCTCGCCCTTGTACGTCATACT	-0.174821	69	53
AAAAATCTATTGTCACCACCCCCCCGACGAACTAACCAGCTCAAAATAAC	0.251745	32	38
AAAAATCTATTTAATAGCCGTTAAAGCACAACGGGGCCGAAGAACCTGCA	-0.283034	12	8
AAAAATCTATTTTGTCAAATACTCTAACCCCGATATTTCAGCGGATGCAA	0.747066	32	63
AAAAATCTCCAGGCGTTGACCATATAGCAGAACACATAAAAAAAAAGTCC	0.00464788	12	11
AAAAATCTGGATTACACTCCCCAAACTTATCTCGCGGCGGACCTCAATTC	-0.370046	51	32
AAAAATCTGGCGAGGGTTCTCGTGGCTAGACGCCCTGATTGGGGTATCAC	-0.608457	9	4
AAAAATCTTACCCGAAACCAGGCATCAAAATCCACGCATGAACGGACGGC	-2.09006	43	4
AAAAATCTTACCCGCAAGCCAATCGGGAAGAAGAATGCGTGCAGATAGTT	-1.34478	70	16
AAAAATCTTCTGTGAACAACCGCATTTAGAGCCAGCGAGTGAAACGGCCA	0.547314	16	26
AAAAATCTTGTGGGGACCTGAATGCGTGCGATCGTAAAAAAGTTACTATC	-1.76114	56	8
AAAAATCTTTACCGAAGTGACATAGTCAGTCTCAGTATAACTTGCAGTCA	0.215719	49	56
AAAAATCTTTTAGTGTATAGGTGGGCAAGCAGCGGAAATCGTCAGTATGT	0.0846906	13	13
AAAAATGAAAAAGACTCGGCTTTACGCATCAGGAGTACCGGGGCTCCCAG	-1.25031	18	4
AAAAATGAAAGAAAGAGCCCAACGCCTAAAGGCCGCGACTTTGAGACATA	-0.138453	4	3
AAAAATGAATTTCCGCTGGAGCGCAGCTTCCCTTCCCTGTGTAACATTTC	-1.70707	17	2
AAAAATGACAGAACATCCCATCAGTCGGACTAGTGGAAGGCATTTCAGGG	-2.74852	16	0
AAAAATGACCATTTAAACAGGTCATCGACTCACTCAGCCTTTCCATACTC	-0.530495	36	19
AAAAATGACCTGGGAATGATCATAACGGGATGCTGTGACTGCACGGTGGG	-1.6918	64	10
AAAAATGACGGATAGTCCATAGGGTGTACCCTGGGTGTCAGCGAGGGCGA	-2.48026	38	2
AAAAATGACTGATCGTCCTGCTGAGTCGTAGATCGGTATAGGTGAGCCAA	-0.608457	3	1
AAAAATGAGACATAAAATGAATATGCCTAGCAAATGGTACCTGCAGGTAA	-0.896139	7	2
AAAAATGAGACCCTGACCCTGCTGTCCCCTCAGCTACAAAACGAAGTCCG	-0.0694601	27	23
AAAAATGAGATCGGGACTGTCGGATACGAAGGTTAACTGGACCATGTCTT	-1.98217	78	9
AAAAATGAGATGCCTAGCATTCGACCGCAGCCAGCTACGCGCTATTGCTT	-2.1489	27	2
AAAAATGAGCTCTCCGACGTTGCCGTTGACGTGGGATATTTGACCTTGGT	-0.608457	45	22
AAAAATGAGTTACTGAGATATTTGAAACGGGTCCGGCAACCGCACGCGGT	-0.127484	67	54
AAAAATGATAGATAATATGCCTCAAATACACCCGCTTTAGACACGCGACG	-0.503096	35	19
AAAAATGATAGGTAACCCACAACTGCTAAAGAATTAAAGATATCTCATTT	-0.228967	25	18
AAAAATGATCGTTATAGTACAACCACCGAGCAAACCCGGCAACTGCCCTG	-0.608457	1	0
AAAAATGATCTAAATATACAAAGCAAAAAACAGTAACTCGTTCATCCAAG	0.338925	37	48
AAAAATGATCTTAGCTTCGTTTGCACACACTTCTAAGGGATCCGTCGAGA	-0.866286	43	16
AAAAATGATGAGAATCCTGCCAAGCTTGGACAACTGATCTTTTTATTACG	-0.581788	73	37
AAAAATGATTAATTCCTGATTTGGTGCCTGAAATGGTTCAACGCTATATG	-1.33238	32	7
AAAAATGATTATCCAGGCGGATCTGCTACAAAAAATCTACGAACTTGAAG	0.129142	21	22
AAAAATGATTCGGCAGTCTCCGCGTCACTTATGCGTCGTATCAGAGATAA	-1.47345	37	7
AAAAATGATTGTAGTAATGGTGATGCAAAGTTGTAAAGGGTCCAAGCAGT	-2.00364	112	13
AAAAATGCAAAATACACGATGTCCAATCGGCGGTCTTGGTAGCGCCTAGA	-1.63808	55	9
AAAAATGCACCTTTACGTTTGTCGGTTCGTGCCTTCGGTACATGTTCAAA	-1.02289	111	36
AAAAATGCAGGGCTCGAAGTGACTGCGCGGCTGACAGAGTGTAAGCGTAC	-1.963	30	3
AAAAATGCCAGGGCACCTAAGTGTGTTACTTCAGGTGCGGCGTGATTTGT	-2.07479	25	2
AAAAATGCCCATGGTAGGTCAATCTGACAACGTGACATGAATGTCGATCG	-1.70707	11	1
AAAAATGCCGACAGCACTTTGCGACCTGGAACGTCACACACCCCTTACAC	-2.11253	17	1
AAAAATGCGAAGACTACGACGCCTAAGTGTTGCAGGAGGACCTTGGTCTG	-0.608457	1	0
AAAAATGCGAGTGACAGCGTATGTTACGGGCGGGTAACCCTATTCGTATT	-1.49085	28	5
AAAAATGCGGCATTCCTCGGGAACACGCACCACTCCCTAGCTAAATCCGG	-1.01392	35	11
AAAAATGCGGTCGCCCGGAATACGTAGCGCCTAAAGGTGTTAAAAGCGAC	-2.34892	56	4
AAAAATGCGTGTACAACCCAACACAGGATTGTCCGATCAGCGTCTCACGT	-0.138453	9	7
AAAAATGCTGAGACTAATATTGAAGCAATAGCATCCGCACTTAACCACCG	-0.780307	18	7
AAAAATGGAAACCTGAAAGGCTGACACCAATTTGGCAATTGTCGACCAGG	-2.11253	26	2
AAAAATGGAAAGACGCAAATAATAAATGATGGTGCAGACACTTCCGGCGG	-1.52475	54	10
AAAAATGGACTTTCTGGCAAAATAATATAAAAATGACGGCATATTTGTTA	-0.816096	31	12
AAAAATGGCACTATCTAGGTAAAGACCTGCCTCATGCCCTCCGTCCCCAA	-1.49085	28	5
AAAAATGGCAGCGATCCATGCATGTCCTGCTACCGCAATCTCCAAGGAGT	-1.963	30	3
AAAAATGGCGAACTTAATTTATCGAGTTTTCACTTATTTAGAAGATACAA	0.565276	46	75
AAAAATGGCGGTCTGGACTGGCCACATTCGGAATCGCATGGGGTTTTACA	-1.26986	61	15
AAAAATGGGCTCAATGGTCATTCATGTCAGAAATTGGCTCTCGGGGCGCG	-1.55754	61	11
AAAAATGGGTGATCAGGACCCGTAATCACTACCCTCCACGATGATGGACC	-3.07231	46	1
AAAAATGGTCCCTCTAAGGAGGAACCCATAAAAGCAGTAGCGTACACTCC	-0.286873	28	19
AAAAATGGTCCTAATTCCAACCGGACATACCCAAGCCATTACACATCCCT	-2.91104	19	0
AAAAATGTAATTCAAGTGTCCACATCCACTGAACTCGGGACCCAACCATG	-1.01392	32	10
AAAAATGTCACCTCATCAACTGGAATTGCTGAGACGCTCTGCAATCATCA	-0.215414	26	19
AAAAATGTCCATAGTTGTGTAAATGATCAACTGACCGCGACACTACCCAC	-1.01392	32	10
AAAAATGTCCCCACCTAAGTGTCAGCATTAGTACGGCCGGCGGCTATCAC	-1.70707	59	9
AAAAATGTCGACGTATGGACGACTTCAATGGAGCCGACAGTACAAAGCTA	-0.0852084	31	26
AAAAATGTGAAAGGTGTTGCCACTGCTCCGCGGAATGATCAGAAGAAATC	-2.58946	115	7
AAAAATGTGACCGTTTCTAATATGAACCCAGGGCAATGTGTTTCGCATCC	-1.55292	71	13
AAAAATGTGTATCTATAAGTCAAAGGAAATTACGATGTCTTGTTTATTTT	-1.07108	53	16
AAAAATGTGTGTTCTGCCGCTTAATCCGTGTGATAGTTTCCTCGTCAACA	0.338139	51	66
AAAAATGTTGATTGCGGCACGATGTGCTCCTTTTTTACGTACCCAAGATG	-1.99475	7	0
AAAAATGTTGTTTCCGCCACGCGCATACCTCTAACTACCGAAAATGAGTT	-1.60991	97	17
AAAAATTAAAGACGGAGTTCCAACCGAAACAGGGATGACCTCTTGCATTT	-1.19038	67	18
AAAAATTAACGATCGGATTTTCAACATGCAATATGATCAAAAAACTAACA	-1.80238	32	4
AAAAATTAACGTAGCAATGATTGTAAAGTTCGAGATCAAAGCGTAAGTAG	-2.24259	40	3
AAAAATTAAGATTTAACGTTTATATTGAAAATCCAGTTCCGTTCCATCGA	0.522313	50	78
AAAAATTAAGGGTCTACGCAAAGCCCATCATAATCCCCGTCCAAGTTTCG	0.548996	43	69
AAAAATTACATGTCACATTTACACGCCGCACCGTAAAGTAATCACATTCA	0.0228152	99	93
AAAAATTACCACTACTTAATACCAAGGAGGCTTCAGAGAATTAATCTTAG	-0.202991	3	2
AAAAATTACCAGATTTGCGATTACGCCAACGTCGCTAAGCTGGTGAAATA	0.42644	26	37
AAAAATTACGACCGGATATTCTTGTACGACTGACGCATGGCCCTGCCGAT	-1.93021	14	1
AAAAATTACGACCTATCTCTATGTCTGAAAAATTCTTGGCGTCAGCGTCA	0.583682	16	27
AAAAATTACGGCGTCAAGGAAGGAAATTAGAAATACACATGTCTTAGGGC	-2.66684	46	2
AAAAATTACTAACCAGCGATGAATAGCGAGTTGTAAACCGGATACACCAA	-2.40022	23	1
AAAAATTAGATTTATTGACACCCTAATCACGTGGTACTAGACCCGCGCGG	0.685464	16	30
AAAAATTAGTCGACTACTGATTAACCCTTATAAAGCCTCGAGGTTTCGGC	1.10505	30	85
AAAAATTATAGGGAAACCGACTCCAGCCGCGGCAACTAAGTTGAGGCCAC	-0.0354537	52	46
AAAAATTATAGTTGAGAACCTTGGATCCCTAACACTCAGTATACCAATTC	0.0454699	25	24
AAAAATTATCCAACGTAAACTGTGGTGTTATTAAACCCTTACAATTTAAC	0.765862	41	82
AAAAATTATCCACCCAACTGTCCACAATAGCTGGACGATGGGATCGCCCG	-1.15005	54	15
AAAAATTATTAGCAGCTACTGCACTCTGAACCCTCGGTGTGACGAACATG	1.22609	60	190
AAAAATTATTGTCTTCTCCACATACTTCACATCATAGAGATCGGTCACAC	-0.0191062	70	63
AAAAATTCAATCCGCACCAGTATGGTAACCAACCCCTTGGCGCCTTACAA	-1.89631	57	7
AAAAATTCACCCTTGTCCGCCGTTCCACAAGTGACGATAGAAAAGGAACG	1.6002	57	263
AAAAATTCAGCCTCGTATCGAACCAGGTTGGATACGAATGTTCATCGTGT	-1.58929	31	5
AAAAATTCATAACCATTCCGAGATGGCAATAAATTTCAATGTTAGGGTAT	-1.14034	319	93
AAAAATTCATGGACCGGTGCATCCTGCCAAATCAATACTCCGCAGCGAAA	0.690826	23	43
AAAAATTCCCATAACTCTATATTCAAAAGATCGTAGAGTCGCTGCAATCC	0.0359004	20	19
AAAAATTCCCGCCACATACCCATAAAGGCGTAGATCACCGCCGATCAAAC	-0.454306	11	6
AAAAATTCCTAATACGAAACCGTACACCACTGCACCAAAACATATACTTT	0.834996	67	143
AAAAATTCCTTGCGCACACCGCAACACAATCGCCCCCGTCAATCTGTCAA	-0.0885811	43	36
AAAAATTCGCTCACTCCACAGGCCTTGTACGGTGCGGGTACGCAGCACGA	-0.213144	65	48
AAAAATTCTGAGGAAATATACAGTACACGTGAACTTAGACCCCTAGAATC	1.62325	37	176
AAAAATTCTGGTGATTTGCCCGATCCCGTCAAGAATAACTGCACCTCATC	-3.17341	25	0
AAAAATTCTTACGACTACTTATTAAAAAGGTGTGTACTGACCAAGAATAC	1.65432	40	196
AAAAATTGAAAGGGAGTAAATCCTGGGCCCGCATGCTGGTTGTTGGACCC	-0.845785	70	27
AAAAATTGAAAGTACCATGCGTTACGCTGGCGAAGCACGCAGATTCAGGG	-2.49553	65	4
AAAAATTGACGGTACTTAATTTCTTAGCACACTCGTACCATCGTTAAGTG	0.215719	49	56
AAAAATTGACTACGATCCGCGAAGACGATTGTTCATCCAAGAACAAGACG	-1.86122	13	1
AAAAATTGCGGACGCTTGTCAGTGTACCGCATCTCGTACGCAGGCGTGCG	0.0587151	38	37
AAAAATTGCGTGTCTGCGCCCATTTCAATGAGGCAGACACTATAAGTCAA	-3.13419	24	0
AAAAATTGGAACCACATCACTCTAGATAAGCCGACACAAGGCCTGGTTAA	0.95055	60	144
AAAAATTGGAAGCGATTCAACGCATTCAAACGTTTAAAGCTGTTTTATCC	2.18475	41	342
AAAAATTGGACAGCAAAGAAGTGGGCAATAGTTGCCTTTTTGGCTCTTCC	-1.26238	49	12
AAAAATTGGCGGTCTGCCTCATCACTCACATGTTAGCATGCCGCAGGAAC	-1.14397	40	11
AAAAATTGGCTAGGCAGCATTGTATTGCCCGTATGTTCAAGCTGGGTATT	0.28205	54	66
AAAAATTGGCTTGGGCAGGCTCCACCAGAGTATCTCGCACGGGAAGGGTA	-1.70707	29	4
AAAAATTGGTAGGCTCGGTGCCAGAGCATACGGCGCTTTCGACTAACCCC	-1.90774	21	2
AAAAATTGGTGTACTACGTTATCGTGCGAGTTAAGTAGAGAATCAACTGT	0.520009	21	33
AAAAATTGGTTAGGGTACCCACCGGCAACCACGGAAAGTTAAACGATGTT	-0.710239	61	27
AAAAATTGTACAGAACACTGGCGGGCCGCAAACCTTATGACTACCCACTT	-0.342753	22	14
AAAAATTGTCAAACTGCTGAGATCCTCCAACTGTGGGTTTACCGCGAACG	1.23582	67	214
AAAAATTGTCAATCTCTTTACCGGCCAGGTGCAAAGGACCCTCATGGGGT	-1.99475	15	1
AAAAATTGTCATATAGGCTTGCTTACTCATTCAACCGATATTCCCTAGGC	-0.543918	14	7
AAAAATTTAAACGGAACCTGCCACAATCTTCGATTACCGGATACCCAAAG	-0.426135	4	2
AAAAATTTAACACCAGACGAGAGCACGCACCCTATGTCCAGTTGACGAGG	-0.710239	30	13
AAAAATTTAAGCCATTGTTTATTTAGAACCATTTGCATGTTAATGCAACT	0.472456	37	55
AAAAATTTACTCATTCTGGTAAGGATGGTGTAACATCAATATAGGTCGCG	-3.8856	52	0
AAAAATTTAGCGTGGGCCTACTTCATGCCCCGTAGGTAGACCAGCTCTAG	-0.780307	18	7
AAAAATTTAGTAGCCTCCGACGATGAGTACTGCGTCGAGTGCTGCGTTGA	-2.18399	28	2
AAAAATTTCACGATATATAGAACCATAACGGAGAGAACTCATGGACACGA	0.135984	18	19
AAAAATTTCCATTAGTTGTGCTTCTTGGCGAGAAGCAAGTAACCTTCTGA	-0.0823635	38	32
AAAAATTTCTGTGCGGTCCTGTCAGACACCCACAGACGGAATGATACACT	-1.39691	21	4
AAAAATTTGACTCGGGCATAAATGAACGCATACTGGTTGCCAAGTCGGCA	-0.463875	44	25
AAAAATTTGACTTCGACTGCCTCCTTGCGACCGCCTAAACAAATGCGCAG	-1.57786	57	10
AAAAATTTGCAGTTCGCCTTCCGCAAGTATGTCTATTTTCTTCAAACGGA	-2.74852	16	0
AAAAATTTGTATCCCACTAATTTTGTGCCGCCGTCAGTTACCCCCCGTGC	-0.271984	19	13
AAAAATTTGTCTCACGGGAAGGGACCCTGGCGTGTTTTCTAATCCTGTGC	-0.461853	18	10
AAAAATTTGTGCCCCGAGTTAATGGCGTGGGCTCCCAAAATAAGTCGACA	-1.22364	36	9
AAAAATTTTAATAATAGAGGACGTCCTGAACTGATTGCACAGTACGCCGC	-1.66933	51	8
AAAAATTTTATGCATGACCCCCCGCCTTGGCGGACGCTCAGATCATGGGC	-2.3132	32	2
AAAAATTTTCATCCCGTAAAACGTTTACAGCCGAGCCGTACCGCGCGTTA	0.421163	24	34
AAAAATTTTCCTTAAAGTAGGGACAACAAGGACTTGAGCATCATCCCCTT	-0.290003	47	32
AAAAATTTTCGCAGAAATGTCGCGAGAATGACCTACAGAAACCCTCTTGT	-1.70707	5	0
AAAAATTTTGAGGAACGGTTTAACTGAGTAGACTTGTATGACGATAGTAA	-0.682565	27	12
AAAAATTTTGATGCGGCGAGATTTACGCATTGATACGGTTCGGCCTTTGC	-1.19932	64	17
AAAAATTTTTGCTGGGTTAGTAGAGCATAGCGACAGAGAGAAGCATACTT	1.01517	27	70
AAAACAAAAAAAGTCTGGTCACCTGAGGACGTCTAAGGACATCGGTCAGG	0.28829	30	37
AAAACAAAAATGATACTCTCCACGACTGGAACATGAGTAGGGAAGGCAGC	-2.62336	44	2
AAAACAAAACTGATCCCTTAATATCTCCCCGAGCGTCTCGGTCGAACGCA	0.376601	58	78
AAAACAAAAGATGCGGTCGGACTGACAACCCGTCAGAAATGGTTATGTGG	-3.13419	24	0
AAAACAAAAGCAACTCGAGCACGGGTCCGAATGTAGCCCGGATAAATCTA	-1.18382	31	8
AAAACAAAAGCGAATAGATCGACCACAGCCCAAACGGACGTATTCGCCCA	0.870732	112	247
AAAACAAAATCTAAGTTCTCCTGGCATTTGCTGGTCTATGAGGATGTGGC	-2.95983	20	0
AAAACAAAATGCGACCTTAGAAATTTGACAACAAGGTCTGTGGAGGTGTG	-1.70707	11	1
AAAACAAACAAGTCACTGGCATACTGCCAGGGTTAGGACCCGTGACGCTA	-1.07455	50	15
AAAACAAACACAATCTTTAATAGCCCTGTTTCTCTATTACATTGCGCCCA	0.595516	2	4
AAAACAAACCAGTAGTAGATTATCTATTGTTGTCTCGTTCGACATTATTC	0.399184	45	62
AAAACAAACCCGCGACGCCCCGACATATCAATATTATCTACGTGCCCTAG	-0.8316	4	1
AAAACAAACCGAGTACCACTGGTATTATCGGGGGCTACAAAGCCTCCACA	-2.08436	69	7
AAAACAAACCTACCTCTGTTTGCCACGTCCTAATTAAAAGACGTTGTGCC	-1.38165	12	2
AAAACAAACCTGCGAGAAACTTGTTACAATGAGCGCTAAACCAACCAACA	-2.91104	59	2
AAAACAAACGGTAGATCGTCTTAATGCCTCGCTTACCTCACAATTCCGAA	-1.39691	21	4
AAAACAAACTACAGCCGGCATCCATGCGTGCTACACAATCTATTACGTCT	1.15733	51	151
AAAACAAAGCAAGTAAGTAAATGTCTGTGTCCTTGATCATGGACTTCCAA	1.34494	56	200
AAAACAAAGGAAGCCGGTTCGGTGCTTTCTCACGTGTTGCCAATGCACAG	-0.320775	8	5
AAAACAAAGGAAGGTATTTCTAATCTTGCTGCGCAACACGCTCCATCCCG	-0.416085	32	19
AAAACAAAGTGTCCGGCCGAACAACAATACCCATTCCCCCAAACTACCAA	0.70373	48	90
AAAACAAATAGATCACCAGAGTCGCGTTTTTCCCGATTACACTCTTGCAG	-1.01392	29	9
AAAACAAATATCGCTGGCAGGTGTAAATCAAGTACTACGTACGGACTCCG	1.42171	25	98
AAAACAAATATCTCGCATCGTATCCATACAACACGTGAGAGTGCTACGGG	1.68193	32	162
AAAACAAATCGCACCCTTTCTTTCACCCATGAGGGGGAGATTTCGTGCAG	-0.870821	38	14
AAAACAAATCTAAAATAAACGCCCAACCGTAGTTATTTGCACTTTCTGAA	0.9176	29	68
AAAACAAATCTCGTAGCCTTATACTCGGTTATGGGCGCAGCCCAGGGCGA	-0.813251	26	10
AAAACAAATGATAGCATTGGCACATTCCGCCGTACTTGACCTGTGCGAAT	-1.78711	12	1
AAAACAAATGATGGCTTAAAATTATTACCTATATCGCGAAAGCAAATTGT	-0.303075	27	18
AAAACAAATTGCATCCTAACATTAATTGAGATAATGAAATACGACCATTC	-1.23707	14	3
AAAACAACAAATACCGCAAAAGGGAGCGTCCCTGGACGTCCGTACAACCG	-1.20923	61	16
AAAACAACAACAGCCGGCGATATGATCCACGAAATATGATTATCCGCGTG	-0.181013	29	22
AAAACAACAAGTCATAGAGTAACTTCGCTGCCCATTACGAATCATACTTT	1.1656	18	55
AAAACAACAGGATAGGGATTTAAGCTTCAAAGGCTTCCACTAAAACGATA	1.43924	7	30
AAAACAACAGGCCCCACGTAACCTGAAACGCTCTAGAATGCCTTCCCCGG	-1.06799	18	5
AAAACAACATAAGAAAATCCATGATCTCACACTTCAACCGACGATACGAA	-0.762607	13	5
AAAACAACATACAGTGAGCCAGGCCCTGAGGATTGAGATCCATGAGAGTT	0.864849	43	95
AAAACAACATCCCAGGGCAAGTAGTGGACCGTCCTAAACTAGTCCGGGGT	-1.40339	92	20
AAAACAACATTGTTGCGAGTTAACACACAACTATGAAATATTTAGGATAT	1.19192	76	232
AAAACAACCACATGCGAGCCCACATCCGATGCTCGCCCGCCTCCCGATAA	-1.70707	41	6
AAAACAACCCATCCAAGCATCCTATAATTCGACAAGAAAGATGGTTTAGG	-0.68368	68	31
AAAACAACCGCGATTATGCACACCAGTGTGCCTAGGACATTTTTATTTGT	-1.93021	59	7
AAAACAACCTGCTCAATGAGGACCCAACGCCAGTACATTCCCGGTGCAAA	-1.88939	35	4
AAAACAACGCAGCTTTTCCCAGCACGCCTACACTCTGAACACGTTCTTTT	1.22891	49	156
AAAACAACGTATTAGTATTGCGGTGGGTCCTCGGTCCGATAACTTTATAG	0.830024	83	176
AAAACAACGTGTAGGCTCTGTGATATCCAGGGAAGGCCGGACCTCACAAC	-0.0593488	81	70
AAAACAACTAAAATCGGGTGTACGTTCGATAGTCAAGTGACCGTATTGAC	0.578124	57	94
AAAACAACTGGATGAGTTGCTGTTGGTCCCCTGAAGGAGGATGTAGCACT	-1.06799	56	17
AAAACAACTTTACAAAATCGAACTCTCTCATAGCAACAGTCTTTCCACAT	1.09629	23	65
AAAACAAGAATGGGCATGCGGCCATGCTCTTGAGCGGTCAGTTCGCTAGT	-2.98336	42	1
AAAACAAGACCTAAGCGCTTCTCTCCTAGGTGGAAAGGTTGTGTGAAGTG	0.505541	85	130
AAAACAAGATAACTCGCAACGGTCCGCTGTGACACACAATGGTGCACATG	1.68936	41	208
AAAACAAGCCACTGTACGCAAGCCCGGGGAAATAGTTAGCTACGCACAAA	1.37696	38	141
AAAACAAGCGACTTTCAGGTATTCGCACGAACGGGAGCGGGGTCAATCCT	-1.3016	47	11
AAAACAAGCTAATCCCCCTCCTCTAGGTTAAGAGTTATGCGGCACCCGTC	-2.21789	19	1
AAAACAAGCTAGTTCAGCTCTTTGACCGGCAACTTAGAAACTGTTCTACG	1.63804	54	259
AAAACAAGGATAAGCGAATAAAGTTGCCCTAAGATCATCCACGAGATTTG	0.700606	73	136
AAAACAAGGCCGTCCACTAGCCATGTGCATGTTGTTCCGCTTTCCCTCAC	-2.27196	94	8
AAAACAAGGTCCTACGCGCATCGATCTTTTGGAACAAGAATACTCTAGGC	1.2074	40	125
AAAACAAGGTGGTAATCTAAAAATATGCCCACAAACTATGCTCGTCCGAC	-0.572089	26	13
AAAACAAGTAGCGTTCCCATTGTCATTCACAGTTTCCGCTCCACAGACCA	0.82164	66	139
AAAACAAGTCAATGCGTGGTTCTCTCCCTAAGTTATCATCTCAAATGTAA	-0.513146	59	32
AAAACAAGTGCGCCCATGGAAGCTTCTTTTATTAACTAAGCTACGACCTT	-1.10093	35	10
AAAACAAGTGTGCAGCACCGCGTTTGACATCTAAACCATACGATGCACTG	0.12725	22	23
AAAACAAGTTGAAAGCATTCGCCCTACACGCTACCCATACACGATTTTGA	1.32016	49	171
AAAACAATAACGTGCCGCTTTCCGTGTCGAGATTGCGTATTCATAGCGCC	0.391917	113	154
AAAACAATACGCTGGAGCCGGGCGGACTCACTCTAACAATACCAGAACAG	-0.956763	16	5
AAAACAATATCGATAGCCGCATTGTGGACCCCGGAAGAATATGGAAGCAG	-3.48484	70	1
AAAACAATATGTCTTTGAATCTACGGTAAACATCTGATATGTATCATATC	0.490156	27	41
AAAACAATCAAATAAAAAGTAGCGCGCATCGTATTTGCACCCTCATCGGG	0.573537	45	74
AAAACAATCCGAGATTGTTGAAAGACTCCGCAAAACCCGACTGAACTCTT	0.93818	22	53
AAAACAATCGGGTGGATGAAACTCAATCTAAGCCCGCCGCAAAAATTGTA	-0.780307	56	23
AAAACAATCTACCGCCTACCATCTGATGTAGCAATGTCGTCTACGAGTCC	-1.3016	23	5
AAAACAATCTTAACTCAATTGCAGGGTGGAAAATGTAAGGGGAGTACTTG	-1.04671	30	9
AAAACAATGACCAGATTAAATCACACACTAAATTTTCCGAGTAACCTGCA	-2.6879	31	1
AAAACAATGAGCCCGAGGTGATCACTTCGGCCTCCTGAGGATAGATTCCT	-3.0508	22	0
AAAACAATGAGCCGTGTTAGCTAGGAGCTCAAGCCACGGCCGCGCTAGTT	-3.28261	28	0
AAAACAATGCCCACACCCCGTTATAACGCTGTATGTATTACAGCGGAACA	-0.748219	22	9
AAAACAATGGCCTGGGTTCGTTGACCCAAACCCCTCACGAATTATGCGTA	-1.21459	10	2
AAAACAATGTCCCAGGGGTAAAGTTGCCCACCCTGAGGGATAACAAAAAG	-0.608457	43	21
AAAACAATGTGACAGATACCTTTGGACATACGAATAAAAGAACACATTAT	-1.64991	16	2
AAAACAATTACATGTAAATTACTAACCGGTCGGATGGATCCAAACGAAAG	0.0846906	2	2
AAAACAATTACCATCCCAGATTCTCACTCCGATAGTGTGCACTTCGAGGC	0.344516	90	117
AAAACAATTATCCCATGTTGGTACAATCCCAAAACCACTTAAGTCCTTGT	0.672477	69	125
AAAACAATTCCTGAGGCAGCTGCACTACAGCCCAACTCTTTGCCCAGTCT	-0.608457	1	0
AAAACAATTTCGCCAACTCCCTTAGTGGCTCCGTTCTGTCCTGAGTTATT	0.0846906	1	1
AAAACACAAAAGGTGACGGCATACTTGTCAGACGGCCCATGGGCGGACTA	-2.74852	33	1
AAAACACAAACGGCAGCGGCGCAGGACCTTCACAAAGGCCGTCCGTTCAA	-1.05239	52	16
AAAACACAAAGGAGATGAGCTAGTTGAGAGAGCACGAGTTTGTTGATTAT	-1.56303	212	40
AAAACACAAATGTCTTGGCTTCGTGAGGTGCAAGAACATGAGTCATCTTC	-1.95838	53	6
AAAACACAAGACTTACCCAGTTCTTGGGCTTCACGGGTACTCCCCATGGA	-0.913838	37	13
AAAACACAAGATTAATCCTGTATAGACCAGAACCATTTACAAAGCAACCT	1.58877	1	8
AAAACACAAGGTCCCCCCGGTCTCGTAACCTCACGGACGATTGGTAAAAA	0.76918	57	114
AAAACACAATAAATGCTTCGAAGGCTTGTCTAAGTTATCGAATAGCTCCC	-2.21789	9	0
AAAACACAATGAACTTACGGCTAAGCCCGTTTCATACGCTCGCAGGCACG	-0.115235	148	121
AAAACACAATGTGCCCTCCATGCCTCCTACTGCACGAAGATCAGCCTCAC	-0.746607	61	26
AAAACACAATTTCAAGTGGACCTAGATCAGTTAAATCAGGTTCTCAATTA	-0.138453	4	3
AAAACACACAAGCAACGGACGCAACAGACACTCCGTGGTTTGAAAACGGC	0.611711	48	82
AAAACACACCCTAAATATTTTCACTGCCCCCTGAGTTCCGAGTGCGAAAC	1.48094	24	100
AAAACACACGGTGCGCCCGAGACTCATCTCCGGAACTTAAACCCCATCAT	0.677194	46	84
AAAACACACTCGGACTACCTCGTCCATCCTCCCAAGTCGTTTACATGATC	1.28219	92	307
AAAACACACTGGAGATGTTACCCAAGTTCTGACGTGCGGGGTAGTAGAGG	-1.05648	71	22
AAAACACACTTAAATAAAAGATAAATCCCAACTAGGAGGTCCAACAAAGA	1.53416	68	293
AAAACACAGATAATCGTTTTACTACAGGCGTATTCCATCCATTGGGAATC	0.644306	3	6
AAAACACAGCCAAATGAGCTATTACCCTACATCATCAAAACCGATATACA	-1.11928	39	11
AAAACACAGGAGAAGAAGATCCGTTGACGCCGCATATTGGCGGGTGTTTA	-1.05029	27	8
AAAACACAGTAGCTCCTAGGACCTTCCGACTTATTGCTACTTACCGAACC	-1.50794	58	11
AAAACACAGTGGTAGCTGATAGTTGCCTGTCCTCTTGCGTCTAAACGTGG	-1.64455	61	10
AAAACACAGTTGCTTCGCCAGGTCAAAAGGTTGCCCAGGAGCCCAATATA	0.356624	31	41
AAAACACATAAATTGAAGCGGCTCGAAGACAAATCAACATAAGAATCGGC	-0.367295	10	6
AAAACACATAACATAGGCTTCTCGTGAAATTCGTACCACAGCCGAAAGCT	0.0495993	28	27
AAAACACATCGCGTCAGGCATGTCCATTGACAGTTAGGAGAACCTGCTCC	-2.05538	16	1
AAAACACATCTGCGGTGGGTCCAAATGCCCGGGTAGAATTTGAATAATAG	-1.52475	19	3
AAAACACATGCACCAGAAAGACGTAGATGTCAAAAGTAACCAGAATAGTG	-0.713817	19	8
AAAACACATGTTCTGAATGGTGACGTGACCTTCAGTGCCATTGTCCATTC	-1.52475	24	4
AAAACACCAAACAGCAGCCTCACCAATACCCATATTTCATAGCTCTATTG	-0.320775	59	39
AAAACACCAATACTCCGGACATTAGGCTAATTCTACTATTGTGCGAGCCC	0.150073	73	78
AAAACACCAATGAATGATGTCAGTACTCTATGACTTAATGATCACTGACC	-0.775511	51	21
AAAACACCACAATCCGGGCCGATAACACCCCTGATCTTCACGATCTTGAA	0.862395	16	36
AAAACACCACATTTCAACATAGGGTGTTAGCATTCCTCAGTGTATTTCCT	0.267012	49	59
AAAACACCACGGGTTGGTGTTGACGGGCGGTTCTTCGACAGTAAATGCGG	-0.521445	21	11
AAAACACCACGTGCCGCTATTACAGCAGTCAACACCCTCTAACGTTCTTA	-0.374842	18	11
AAAACACCAGCTGCGCACAAGGACACAACCTCCACGACAGTTATAAAAAC	0.931988	11	27
AAAACACCCATTTTACTATAGCATTAAAGACGTGTGAGCACGCGCAAATG	1.352	77	276
AAAACACCCCTTCGGTGTTATACCATGTCACATATTTATCACCTGTTAAA	-0.342753	22	14
AAAACACCCGTGAACAGGGGAACAGATATCACCACATAAAGCACGTCGAC	0.85788	41	90
AAAACACCGATATCAAAATTCTTAAGGCGCCAGAAACTCCGTGGCTAAGA	0.278847	13	16
AAAACACCTTACAGCGAGGCTAATTAAAGCTGTACGGGACCGTGCACTCC	-0.0655916	42	36
AAAACACGAAAAGCTATACAATCAGACCTAAGTAATAATAGTTGATGACA	1.37746	27	101
AAAACACGAACTTCGACTAACTTAAGCCGCGTTTTGACTACTGTTTTACA	1.44383	55	217
AAAACACGATCGACGACACACTACACTGGTCCGACCCTATTCTACCAGAA	0.431887	52	74
AAAACACGATGTGATCAATTGAGTCGTTCTAAGTTAATACCTCTAATAAC	-2.1666	37	3
AAAACACGCATGTTATACCTATTGACCGTCAACTAAGTTTGATATGACTC	-1.60171	26	4
AAAACACGCCAAACTCTTCCACAAAAATAGTCATCACTTCATGGGCCGTG	-0.0206699	19	17
AAAACACGCCAGGAACATATAATGAATAGGAGGCATCAGGATTGCAAGGC	-0.805167	55	22
AAAACACGCCGACATAAAGTACGGCTAAAACCTCGTCTCTACCTAAATTA	-0.426135	19	11
AAAACACGCGAACTATGAATTGCCCCACCGCGCTGTTAACTTTGCACAAG	0.27059	92	111
AAAACACGCTATGAACCACTTCCCCAAATCGATGGAGAGGTGTAGTTTGC	-0.669081	16	7
AAAACACGGATCCCTAGGATGATGGTTGAAACTATGTCTACACGGCCTTA	-2.95983	20	0
AAAACACGGCCGCCCGGAGTTGAAGTGTTTATAGACGATATAACACACTA	0.0217768	81	76
AAAACACGTAAGCTCACGCAAACGTGGAGCCTTTTACGCCCCCTGTCGGT	-1.31813	60	14
AAAACACGTACCTGCATTTAGCTGACGTACGCCAAAAATCAGCCCGTAGA	-0.0330924	107	95
AAAACACGTATCGACACTTGACGGCCTACCGTCGAGCGTGTTGAAATAGA	-0.809127	21	8
AAAACACGTCAACCAAACATTGAACGCGCCTTAGCCATTTAAATGCAGCG	-0.98002	28	9
AAAACACGTCGCTCAATCCCTGCGTAACCCTGAAAACCACCGAACACACC	0.209854	29	33
AAAACACTAAACCACTGGGAGCGTTATTGAGCCCGGAAAAATCCTGAACG	0.347055	9	12
AAAACACTACCTCGTATAGACATGCGTACCGTATGGGTACCACCGGAGTG	-0.469195	86	49
AAAACACTACCTTGCAACATTAATATCCCAAACAGCTGTAAATCTAGGGA	0.850477	72	156
AAAACACTACTAAGCCCCTGAACGCTCTCTCTGAACCCCGCGTTATGATC	0.75374	20	40
AAAACACTACTCAACTATTCCTTAACCAATTAAATAAAAATTACAAAGGA	1.93243	54	348
AAAACACTAGCACTTCGGCTCAGTTTTATCATAGACCCTTTCCGATCCCA	1.23331	12	40
AAAACACTAGCTCAGCCTGAAGTCAGATAGCACGGGTCAGACGTGTAAGC	0.886732	112	251
AAAACACTAGCTTAATCTGAAGTATTGTAGAGCACTTGTACCAGAAGAGT	-0.426135	14	8
AAAACACTCTTGAGACTGCCCAGCCAATACCTGTGAACCCACCAAAATGA	-1.45575	41	8
AAAACACTGAGACAAGCTCTACCCCGTCACGCACACTATCTGATTCGGCA	1.47098	87	351
AAAACACTGGCCATGCTTATATAGGCCGAATCTTACAAGTAATCAGACTT	-0.11598	10	8
AAAACACTGTGCACACAAAGAATGATTAACTAACCTGTTAGTACTTAAAG	-1.48393	47	9
AAAACACTTCGCGTGATGTTACCGCCCAACGCCGTGCTTTGGTCGTGTGT	-1.32513	85	20
AAAACACTTTAAGCTCATTCCCCCTGAACACAACCCAACGAATCGCGGAG	1.54432	68	296
AAAACACTTTTGACGCCCTGCGGCCACGTAGACACCGATGAACGACAGGT	-0.485854	22	12
AAAACAGAAACACCCGTCAAGTGGTTCACGGTAAAGCTGTCCAAATGTAA	-2.14379	64	6
AAAACAGAACGCGAAGCAAGTCATCCTAGTACCGAATCCGCTCGCGTTTG	-0.896139	15	5
AAAACAGAAGAGTCTCGGAAACGGAAGCAACTTGGATGTTCTCCCTCGAC	-0.550188	99	52
AAAACAGAAGCGCTAACCTCTACCGCTCCGATGGTAAAGCAGCACACAAA	-1.16807	20	5
AAAACAGAAGGAGAACCCCGAACGCGTGCGGATCCTTGCGAGCGGTATTT	0.595516	38	64
AAAACAGAATCCCGAAAAAGGAATCTCTTAAGTCGTTGTCAATCGCAGGA	1.45078	49	195
AAAACAGAATGCAATATAATTTCGTACTCACAACCGCCGTGGGGAGTCCC	0.536676	6	10
AAAACAGAATGCACAAATCACGGCGTTCCCTCGCGACTCTCGCCTGCGTG	-1.06044	21	6
AAAACAGAATTAAAATGACGCACGAATGGTACCAAGTGCTACGTTGAAAG	-1.01392	5	1
AAAACAGAATTGTGACGCTAAACGCGTCTTGAATTAACGGTACGACACGA	-1.99475	7	0
AAAACAGACAAACCGAGCTAAGACTTTATTGAATTTCAAAAATCACACCA	0.0491839	85	82
AAAACAGACAGATGTCCCCCCGCGCTGCTCCCGTGCCTTTTCCAATTAGA	0.296	16	20
AAAACAGACATAAGTACATTAAGCAGATTTAGAAAACGGCTATCCATTTG	0.528183	42	66
AAAACAGAGCACAAATACGCCGAATGATGACACCCCCCAAAGCATAAGCG	-0.629963	46	22
AAAACAGAGTCAATTCTTCATCAGACCTAAGGTCCAATCTCGAAATTTCG	1.49942	25	106
AAAACAGAGTCACCCGGAAGGCTACTTTACGTCGCCATGCTTGAAGAAAA	-2.11253	35	3
AAAACAGAGTGGTGGATAGCTCCGCATAGAACATACCTCCGGAAGACGGT	-0.403013	56	34
AAAACAGAGTTGCAGTAACCATTCTTTGACACTCACGGCAAAATTCGCAG	-1.44924	50	10
AAAACAGATACAAAACAAACGCAAATAGCCGTGCCCTCGTTAATTAACCA	1.04404	99	260
AAAACAGATACCCCCTGGTTACTCAATTTTGACCAGATCTACTGCGATAC	0.0846906	2	2
AAAACAGATACCTGGGACTCTTGCCTTCTAATATCTTGTTGCCGTGGTGA	-0.485854	22	12
AAAACAGATCCGATTTTGGGAAACAATGTGCGACGTTACCCACGGCTCCT	-2.33568	44	3
AAAACAGCAAACAGGCACCTTAAACAGCGCCCTAAAACAGGCCCCTCTGC	-1.70707	47	7
AAAACAGCAGGTCTCACGAGGAAACTGGAGCGAATCACTCACACTAGGAA	-0.853579	22	8
AAAACAGCATCTGTAGTGCTATATCATACTGATGCCCCGTACTTATTGGG	-1.34243	24	5
AAAACAGCCCAATCACGGTTAGTCCTTCGGGCTACATGATGGCTCCTCTT	-1.329	36	8
AAAACAGCCTAGGTGTTAGATCTGGATCCAACCAACGTTGGTCAGCGACA	1.13539	56	162
AAAACAGCTAAATGTAAGACTAACGCAACAGGTTTACCGGACACAGCATA	-1.01392	41	13
AAAACAGCTATAGAACTGTTCATCAACACTTATTCTATACAACCAGACCG	0.890778	91	205
AAAACAGCTTCTTACCACTCGCTAAACTTCAACCTATGGCACCTATATTC	-0.097631	23	19
AAAACAGGAACGCAGTCTAATCAAACTCATCCTCATCTTATCGTTAACCA	-0.210774	42	31
AAAACAGGACAGCGTGGAAAACAAGTCGAACGTTGTGGATCTCGATAACA	-1.41939	8	1
AAAACAGGCCCCTACACGTGGTTAACGGTCATACGATGGCCCCCCAACAA	0.724349	47	90
AAAACAGGCGCAGGGATCATGACTCAGAGTTAGTGAGCGGAATGACATGT	-1.04059	113	36
AAAACAGGGACAGAGATGACAAATGCTTACGTCTTGAATTGATATCATCT	-2.58946	28	1
AAAACAGGGCAACGGCTATGACACTGTTAAGCGGCATGTGACACTATAAC	-1.82485	26	3
AAAACAGGTATAATAATTCATACCTCCTCTCAGTTTTGTAAGGAGGTTCG	-0.287985	44	30
AAAACAGGTGCGCGCGGCCTAGCAGGATCCTTGCCTCAGTCCTACAGATT	-0.896139	39	14
AAAACAGGTTACCAAGAAATGGAGAATCTCCAAATATCGCAATATTCGAA	-0.8316	39	15
AAAACAGTAATCCACATTATCCCATTCCGGCGCTGCGAATTAAAGCCACA	1.01423	14	37
AAAACAGTACCATGGTTTTGCAATATCAGTGGCGCTATCCGGATCGATAC	0.132319	40	42
AAAACAGTAGAGGTGAGCGCGGACCACGAATACTAAAAGTCGATCGCCTC	0.234973	36	42
AAAACAGTATTAAACAAGTGGGCGGCTCTTTTTACGGGTGCGAGACCCCC	-1.56397	25	4
AAAACAGTATTCGTAGCAAAAAAAATGGGCTCTTGGACGCGTTGTTTAAA	-2.25068	30	2
AAAACAGTATTGGTCTAGCAAATCCCCAGTACAATGTCCACGACACTTCA	-0.932953	82	29
AAAACAGTCAAAGTAAATCGCCTCTGTGGACCGGGCACATTGCTTCACGC	-1.49085	28	5
AAAACAGTCATTATATAGTTACGCGGATTCTCTGACGGTGATCGCATGGC	-0.177674	64	49
AAAACAGTCCCTAGAAATGTATCCTTGGTCTCTCACCTCCCCCTACGAGT	-1.77161	31	4
AAAACAGTCCGTGCATCTCGTCGTTAAGTGTATGTACATTCAGATGGCTT	-1.68838	105	17
AAAACAGTCTTAAAAGTATACACGAAACACAAGAAGCCCAACTAATCTAG	2.62863	36	470
AAAACAGTGGATTACATCCCTACCTTATACTTAATTGGAATCCGTCAATT	0.73668	61	118
AAAACAGTGTTAGGATCCGTGGTCAGTACGGATTGAAGCCGCCTTACTAC	-1.20316	28	7
AAAACAGTGTTGCCCCGACAGTCGTTCGGCCCCAGAACAATGGCAAAAAA	-2.11253	8	0
AAAACAGTTGAGGGCCTTCAGGCACGGCCGGTCCTACCGAGATGTTTCGC	-0.290922	98	67
AAAACAGTTTAGGCCGTCCCGTACCCCTGTTGGAATCGCAGTTATGGAAC	-2.11253	8	0
AAAACATAAAGAAAATAAACCCTTGCATATGGATTCTCAAAAAGCATGAG	-1.41939	53	11
AAAACATAAATGTAGGGAAAGATCACGTTTGATAGAGAAAAAAGAGATAT	-1.48393	23	4
AAAACATAAATTATGCACGGGTTCAAACTCCGGGTAAACGAGCACCCATC	-0.971362	22	7
AAAACATAACAGGCTGACATTCCACGTTTGCTGAGAACAGGTGAGCGGTG	0.482374	42	63
AAAACATAACATAACAAACGTATTAGCGCCAAGCAGAGATTCCACCTGGT	0.402294	106	146
AAAACATAACCCCTCCTGACCATTTTTCCTTGTGGATGCCTGATTAGTGT	-2.40022	35	2
AAAACATAACTCGCGTCGGGTATCCTAAGCCGTTAGCGGAGGATCCAATT	0.220492	54	62
AAAACATAAGCAACCTCATGGGCCGCGGTAACGGCCTATGGAACCGAGTG	-2.18399	57	5
AAAACATAAGCTGCTACCCTCCGAGCCACTCAAAAGTGATGCACAAGCTG	-0.218259	87	64
AAAACATACAGCTAAACTCCGTAATCAACATTCCCATTTGCCCTAAAACG	1.64867	17	85
AAAACATACGAATTTGCCAAGTTGAACTACAAACCTGAGAAAGCAGCCAC	1.95056	12	83
AAAACATACGATTTCTACGCCCCTCGAACTTACGTTTGTCGACCTAGAAC	1.24302	64	206
AAAACATACGCAATTACTTTTGACTGAGTAGTTAGCGTCGAAATACCTAA	-0.113135	38	31
AAAACATACGTAGTGGTCGTTGGCGCCTTTTGGAATAAAGTTCTTAGCCG	0.190051	8	9
AAAACATACTACCTTGACTTGACCCAGCCCCAAGGCAAGCGGACTGGGTT	-1.58599	100	18
AAAACATACTCAAGTGATTTGCCCGACTATAGCTCACGCAGGCCGCCGAG	0.361677	46	61
AAAACATACTTAAGTCCCTCTTTACGGGTCCTCCCATACATTCCTTCAAT	1.50377	14	61
AAAACATAGAATCGGGATTAGCTACAACCCTTGGTAGTCGGCTTTATGCG	-1.3016	19	4
AAAACATAGAGCTCAGATCTCTCTTAATTGGCCCCAGGTTCAAACGCCTT	-0.662524	18	8
AAAACATAGCCTGATATGACCGTTGCGCTATACCAACTATTGAACCCTTT	-1.48094	66	13
AAAACATAGCGGTACAATTGATTTGTATGAGGGCAGACACCGCGTGGCCA	-0.866286	43	16
AAAACATAGGTGTGAGCGGCACCTGGGGCTTGAGCGTAGTGCGAGTCACC	-0.432	56	33
AAAACATAGGTTCCCTGTCCGGTTGTCGCTGATAGCCGTTGTACGGGACC	-0.813251	26	10
AAAACATATCAAGCTTACAAATGGGGGTACTGCTGAGTCCAACGCGGTCA	-1.63296	38	6
AAAACATATGAGCAGCGATGGGCTGGCGAAGACAAGAATACTATATGGTA	-2.48026	90	6
AAAACATATTCTGTCTTGGATCAACTCAGCTAGTCACGAGAAGGTGAATT	1.22679	44	140
AAAACATCAAAAAGCGACACCTACGAGACAATTTGAAACCCAGGCGGATT	0.724728	57	109
AAAACATCACCAAGACGTGTCCTTGTCCAGGAACAGATCAGAGACCCCCA	0.963241	26	64
AAAACATCCACTATTATCTTGACCAGTTAATGCTGAACCGCGACCATATA	0.197486	66	74
AAAACATCCCTGATAACAAGAGCAGGGATTTTCCGAGTCCGCGGTAAGTC	1.80149	29	166
AAAACATCCCTGTAAGTCTTCCCGGCTACCCCATAGTATAACACACAAGA	0.633257	25	44
AAAACATCCGAGCCCGAGAAGCCAGCTCCCCAAGAGTCATTTGTTGTTTG	0.298265	20	25
AAAACATCCGAGTCAGCGATGATGATCCCACAATTAGTGGCAGATTAGGT	-1.42887	158	34
AAAACATCCTAAACATCGCACTAGTGGCCGTCACCGCATATATATAAAGA	1.21505	30	95
AAAACATCCTATCACCAACTAAGCACATTGTAAAATTCTACGGACTTCCT	-1.99475	39	4
AAAACATCGTGTCATTGTAATCGTCTCCGACTCGAGTAAATAACCCGACC	0.813556	54	113
AAAACATCGTTGGTCCAAAGGTGATCACCTATCGCATTTGTTACGCCAGA	0.96276	31	76
AAAACATCTATAACTACTACTACGGTGTCCACTCGTTGGACAGCAAGAAT	1.11771	20	58
AAAACATCTTACCGTTCGAGGCCGCCTCGCTGAACAACACAAGGAAAGAA	1.39094	38	143
AAAACATGACAGGGCCCACACGAGTTCGCCCTGATCTGCCGTCGGGTACC	-0.0330924	17	15
AAAACATGACTTAAGTTATACTGAACTAGGTGCCTGTTGAAACCGCGAGC	-0.403973	118	72
AAAACATGAGTGCCCCAGTAACCATTCAAAAAGAAAAAGATGAGACGCGG	0.416048	27	38
AAAACATGCAGCGCATCCAATGAGTGGGGTCACGCGGTTCCCCTCCAATA	-1.76114	37	5
AAAACATGCATAAGATCGCCACTGCCGGGATGAGGGTCTCCCTAAGGCTG	-0.474925	20	11
AAAACATGCATTTTATAGATAGTCCATAAACGAGTTGACAAAACCCACTC	-0.225464	29	21
AAAACATGCTCGGGCATACCTAACTGGAACGCTGTTTGATTTCCATCATG	-0.852434	96	37
AAAACATGGAAGACTTGTGCTTTGGCTCACTAAAGCCGTATGGACATGCA	0.61395	42	72
AAAACATGGGATTGCATCTCCAAGTATAATTGACATACACCAAAATGATT	-0.283034	38	26
AAAACATGGTGCGAACGTGCAACTATGACGAAACATCGCTCACTCTCTTG	-0.309725	134	90
AAAACATGTCGGTTCCAACGCACAACAGCGAGACTTGGACCGCTAGATAT	-0.320775	26	17
AAAACATGTCTGGGACAGCAGCAGGCCCTCCGTGGACCACGTTGATTCAC	-1.26881	119	30
AAAACATGTTAAAATACAACCGTTTAGCCAGTAGACTTTTTGCGCCATAT	-1.52475	4	0
AAAACATTACCTTAATTATGACATCCCTACTATTGAATACTTTGCCAAGA	1.91994	14	93
AAAACATTCAACGGATTGGGGCTCGTCTCGGTGCGTTACGAGAATCGTGT	-1.4447	59	12
AAAACATTCTCCTGCGCGAACAAGCACGTCCCTTTGGAAAGGGAACCACC	-1.38165	12	2
AAAACATTCTTGATCACAAGCACGCAAGCAATTGATCAAATCCTCTACCC	0.680988	64	117
AAAACATTGACACTGGTCGGAAAAACGTGGCATACAGTCTCGGTTACACA	0.00464788	25	23
AAAACATTTCGCCTCTTGGCCCTCGATTCCTCTTGTGGGATTAGTCGTAC	-0.0907581	86	72
AAAACATTTGAAGTTAACAGACGAAGAAAAGTCATAAGCCCCCACGGAAT	0.507547	56	86
AAAACATTTTACGAGTGGTTGCTAATGTATTGCCAATATAAGCCAAGTTT	-1.38165	12	2
AAAACATTTTTGAAGCAATACCTGCCGACGGCTCTTACACTAGCATCAGC	1.64284	23	113
AAAACCAAAAACTAGCCCTTCGAGTAGGCAACTGCGTGTTTGACCTGCGA	-0.538252	109	58
AAAACCAAAATCCGTAAAAACATGCATTCGGGACTCCCCGGCGAATAATG	-1.70707	17	2
AAAACCAAACCTTTACCGTGTCCAGAATCCCAGAGAGAGGACGTCAGAGC	0.572575	96	157
AAAACCAAAGACAGCCCATAATAGAAGTCGCTCAAGAGCGCGGTTAAACG	0.300914	57	71
AAAACCAACCAGCCGCACACCCGACCTCTCGGGATTCACCATACGTAAGT	-0.474925	6	3
AAAACCAACCGGGCTTAGAGATCCCCGAAACTGAATTTTTTAGCTGTAAC	-1.18828	24	6
AAAACCAACCTCGAACGCTGGCACAACATCTTACATTAGGCGAGCCCGGA	1.41969	19	75
AAAACCAACTACTACGTTGGAAGCCGAATTTCATGTTTCGACTAATACAC	0.583682	33	55
AAAACCAACTTTCTCGTAGGGTACTATGAAAATTCAAGTTTTAGGCGCAC	-1.78711	12	1
AAAACCAAGATGCGACAGCTTACTTTCCGAACCGCGCGCAGCACGTGAAA	-1.3016	7	1
AAAACCAAGGACGAGCTTTGATACCCTCATGACAAGGCCGTCTCTCAGCA	-1.79985	78	11
AAAACCAATAGACTGTCCCCGTCCCTCCTTCCGATGAGGGAGGCAGTATA	-1.86122	69	9
AAAACCAATATGCGAGGACTCCCTCATTGCACGATGTGCATCCCATGCTT	-2.76794	51	2
AAAACCAATCTAGGTTGTATAGCTAAGTACAAAGATGAAACAGTGAAATA	-1.59707	42	7
AAAACCAATCTTTGTGCCGTATTCAACCCCGCCGTCCTACCAACGCCAGA	1.36235	16	60
AAAACCAATGCATATGCAGGCATGGCCGAAGGATTGCGTTACGATGGGCA	-3.90429	53	0
AAAACCAATTGCCGACCGGGTTTCACCTGAAAACGAGACAAACGGGAACA	-0.385313	15	9
AAAACCACACTATAACTGTTAAATCCATAAAATGGGTTGCCGACGGCCCG	-1.63808	55	9
AAAACCACCAACACATACGGGGCACATGGTCAAGCACATATGTGCCCTCC	-0.503096	8	4
AAAACCACCATGTCGCCTCCGACCATGTTAACAGTTATGGAACGGCCTAT	-1.93021	14	1
AAAACCACCGATAGAATCCCCTATGGCTCACGAACAGCGTTTGTACAGCT	-1.3016	31	7
AAAACCACCGGTTCTACAAATCCCATAAAACAAATTACGATACAATTAAG	2.0306	14	104
AAAACCACCTACTCACGACGCAGACAAGCAAGCAACAAATCCTCGCCTAG	1.49346	43	179
AAAACCACGATGAACTGTACGGCGTCCTAATCGACTAATTAAAGCCTTGT	-1.3016	51	12
AAAACCACGTGTACCGAGTCTCACCGCCTTACTTCTAGACGCTAAGTGGT	0.512135	44	68
AAAACCACGTTACCTACACCCAAGTCTTAGGTTATTACATCCTGTGTGTG	0.929901	136	318
AAAACCACTAAACTGACATACTAGGCTCGAACCTTCCTTGATCAAACGAC	-0.688499	38	17
AAAACCACTCAGCACGAACGTTTTGAGGTTCGCCCAGGCCCATTCTCCAA	0.325853	21	27
AAAACCACTTCGATTTCAGAAACTTTCGAAATCTGCGATGGTGAGTATAA	-1.58302	52	9
AAAACCAGAATAAGAGCATCACACTTCTTACCCTAAGTGACGCGCCCAAT	0.91476	91	210
AAAACCAGACACAGTCTTAGAAGCGAGAGCTCGCTCGAAAAAGATGTTCG	-2.94383	61	2
AAAACCAGACAGGTCCTTCCGTCGACGAAGTATGCTAATCGCTCCTCTAT	-0.301726	77	52
AAAACCAGACCATGATGGCCTGCGGAGACAACCCATGAATATAGGAAATT	-1.50454	48	9
AAAACCAGACTTATTGCTCAGTTATACCCTTAGCACGGGTTACGCTTCGT	0.478595	28	42
AAAACCAGCAGGGAACCGCCGCAGTGAAGAGGCCGACAGGAAATGTAAAC	-0.72624	44	19
AAAACCAGCCTCAGCGTAGACTAGTAGACTAACAGGTATTTATAACCCCA	0.777838	23	47
AAAACCAGCGACGAGCGATGACACCCTAAGGCTATCATACTATGCACCCT	-0.8316	94	37
AAAACCAGGGCCCGTATGACGAGTAAAAGCCGCCGTTAAGACTCGGTCGC	-1.69308	70	11
AAAACCAGGTTCCTTTGATAGACATTGAAAACAAGGTAGCCCATACGTTC	-0.495128	49	27
AAAACCAGTCCGTAAGTCCTATGCGGAGGATCTATCCTCCGATGCCAATG	-2.37612	81	6
AAAACCAGTCGCGGAGTCTTGCGAATACCACAGGCCGTCCACGACGGTTT	-1.10093	35	10
AAAACCAGTGAACATAGAGCGCAGCCACAGATAGGCCGCATCATATTACA	0.141849	16	17
AAAACCAGTTAAAAACGATTCAGCCGAGGATTAAATCTCGTGTACTGCCT	-0.400817	12	7
AAAACCAGTTATACTCATCTTATCACGTTGCAACTGCTCACACGCTTCTC	-0.0864577	88	74
AAAACCATAAACTTGAACACCCGTCAACATTTCTCATTATTTTCTTAGCC	-0.367295	54	34
AAAACCATAACCTATATCGGCCAGCGCGCATCACATAGTGCTCGTTGGTA	-0.0393621	59	52
AAAACCATAAGAATGCAGGGTCTGTACACGAAAGGGTGTTCCCTACAATA	-0.619506	90	44
AAAACCATAAGCTTAGTGCAGTACGCCTTCGGTTGTGAAACAAGAGCAAC	0.787228	52	106
AAAACCATACTGAACTGAAATTACTGGGCCCACTCTCGTGCTCGATAGTA	-1.01392	26	8
AAAACCATATGAACAGTACGCGCTAGCTATACACTTTCATCTACGCTTGA	-1.6918	64	10
AAAACCATATTCAGCATACAACGAATCCAAGCTTTTACTTTCGTATCCGC	0.992949	124	309
AAAACCATATTCCGATTCAGATGACCATATCCAATATACTCCATACTTAT	0.777838	25	51
AAAACCATCAGCCGAAAGGCTAGGAGGCTATGTACTGCACCTCAACGCTA	-0.608457	13	6
AAAACCATCCGCCTTGGAACGCTGTTCTCGTTGTGGCCTCTGAGACATTC	-1.66451	22	3
AAAACCATCGACCAAACCCCGCTGTTTTGTGAACGGGTATTGGCAACTCA	-1.47345	18	3
AAAACCATGCGATTTGATCTGCCGGAAACTGGGAATGGATGTATCGAGAC	-0.87812	54	20
AAAACCATGGGACCACATGCTGCATACAAGACCTGTGTTGTACCGGGCTC	-1.19624	17	4
AAAACCATGGGCCAGGTCATCCGTAACGGACCCGCAGATCAAGTTTCGAA	-0.891024	129	48
AAAACCATGTAATTCCCAAGTCCCATGCTTCAACCCCGACCCAATATGCC	-1.63011	49	8
AAAACCATGTGCGATTATGCAAACCCTTGAGTATAACGCGCGGACCACTT	-2.58254	71	4
AAAACCATTGTCCTGAGGACAACTCCAGGAACAAGCCGCTTCAGACGCCG	0.0846906	42	42
AAAACCATTTCCAACGCTGGCAACTCGCCTCGTTCAACAGAGTTATACAT	0.974548	22	55
AAAACCATTTCCATCCGCCTGGGTCTGACATTTAGCGGGTAGCGACCTAA	-1.82485	26	3
AAAACCATTTCTACAGACTTCACTAGAACGAATCGCCCATGAATAACGAA	2.16413	11	95
AAAACCCAAACAGTCCCAATACTGTCAAACTATAGCCGCTTACCTGTCGG	-1.90774	21	2
AAAACCCAAACCTGAACATGGCCTCCAAAACACCATAAAGCACTACCAAA	-1.96943	38	4
AAAACCCAACCTGGTCGTATGTCAATGATATGAGAAGCAGGAACAAGGCA	0.69328	36	67
AAAACCCAACTCACCGATACTAATACCGCTATAGTCATATCGCCCCGACA	0.0846906	84	84
AAAACCCAACTGGTAGCAATATCACGACTTCTAACTGCACATCGTCCGCG	-0.821018	46	18
AAAACCCAAGACGAAATCGGATCACATAGTGCACATCGTTAGCCAAATGA	-0.320775	2	1
AAAACCCACACTACGCACAAGTGCATCTTGACAAAGACAACGTGGATTCC	1.41323	48	184
AAAACCCACCCCCAGGCCACTTTCGCGCACATGTAAGTTAAAAAGCGAAT	-1.74789	24	3
AAAACCCAGATTTTACCGCTTAGTCGGATAGAGATTTGCGAAGATGCCCC	-1.6351	66	11
AAAACCCAGGGTCGGTAGACGAAGACTGAGGCAGCCTGACCTAGCCGCCA	-1.18828	49	13
AAAACCCATACCAGGAGGACGTGTGGGATTGCCTTGCTAATCAAATAAAC	0.670975	73	132
AAAACCCATCCCGGCTGTCGGCGAAGCGTCTCGACGATAGAGAGCAAAAA	0.456254	19	28
AAAACCCATCCGATAAGATGTCAGTCTATGGTGTGGCGTTTTAGCTCCAG	-1.83712	40	5
AAAACCCATCGCCCGTTCTATTCCCCTCTACTGACGCTGACGAATACATG	0.388373	61	83
AAAACCCATGAAAATCACTGAATCCCAGAGACGAACGCCTCTCGATTCGA	-1.48393	23	4
AAAACCCCAAGAACCACGAACACGCGTGATCTATTCGAGTAATACGTCCA	-0.426135	49	29
AAAACCCCAAGGGACTTACAGGTACTCCGAGTCCACGATAAGGAATGCGA	0.149229	14	15
AAAACCCCAATTAACTCAGGCTTCGAGTACGACCTCCTAAGTCCAGAGCC	1.55554	50	221
AAAACCCCAATTAGCGCCTAAGTTCAGATAGCAGCACCCCCGCAATCGTT	0.193324	60	67
AAAACCCCACCGTGCCCTAGCCGGTCGACCTTCTTTATGCCCGCACAGTT	-1.72769	97	15
AAAACCCCATCTATGGTGCCGCTGACCCGCTCCGGCCAGACGCCCGACAA	-0.608457	1	0
AAAACCCCATGCCCATATCTCGCACGGTGCGACTGTGAGTATAGTTGGAG	0.452415	35	51
AAAACCCCCAACTACGCTTGTATCATGCGCTTGAACTCTAAAGGTCCAGT	-1.5347	100	19
AAAACCCCCATGGGAAATTATCTTCAATGGTAGTGCGATCCCAAAGCGAC	-0.407786	17	10
AAAACCCCCGCCATTCGAGGCGTGAGGCATTCAGTATAAGGCAGATATGG	-2.19769	48	4
AAAACCCCCGGGCCATTTCCTATGCAAACGAAATGTTCATAAGGCGTAGA	0.0846906	15	15
AAAACCCCGACGTCCTTAGTTAAAATTTCCAAGACGGCAGCGAGGGAGGA	0.99541	71	178
AAAACCCCGATATGCCCCTAGTGTAATTTACATGATTGCACCCAGCTGAA	-1.52475	19	3
AAAACCCCGCACCCGCTAACAAATGGTTGAACCAGAATGCGGTCTACGAC	-2.55437	27	1
AAAACCCCGCATCGATAGACCACTTGAACGGTGCGTAGGGGCCTTACATC	-0.269481	56	39
AAAACCCCGGCTACACGCGTAGTTTGACAAAAATGACCCTCGCATGTGGA	0.900055	49	112
AAAACCCCTAACGCATTCGAAGCGCTGAGTAACACAGCTCTCTTTAGTTA	-0.0871597	56	47
AAAACCCCTAGCTCCTCTATGGGGGTTAAGACTGACTTGTTCGCCCGAAG	-0.741988	31	13
AAAACCCCTTAGGTTCCTCAGCTCATACATAACACCCAAAATTTCATTAG	1.10061	20	57
AAAACCCCTTTGAAACCAGCCGCTAGCCAAGGTAGGAGTAACTCATTTAA	0.690826	5	10
AAAACCCGAACGTATATCGTTATGACGGGGTTCGCAGAGACCTTACTCGC	-1.95553	99	12
AAAACCCGAATATAACAGAAGCCGGCCCTGCTTGTAGGGGAACGGCAGTC	0.0201521	15	14
AAAACCCGAGACTTATTAAGCTCAGCATCCTAATCAGTATCATTTTTTAT	0.743936	14	28
AAAACCCGAGGCGATGTGGCAACATCCGTGATCCGAGTAACATCCAAAGG	-1.52475	24	4
AAAACCCGATGCCGGTGGTGACCGCTAATAATAGCAAGCAGTTCGATCTC	-0.805625	94	38
AAAACCCGCCATGCGATGATGACAGCTCTTAATTGCCACTACATTAATTG	-0.744589	54	23
AAAACCCGCCGTGAATTACCAGCAGCCCAGCGTATAGCCTAATTGCTACC	-0.0359374	43	38
AAAACCCGGAATACGTCCGTGGCACAGATATGATCCAAAAAGTCGAAACG	0.554694	4	7
AAAACCCGGAGGCCAACCTTGCGTGTACACCCCTCAAATATACTCTATAT	-1.01392	8	2
AAAACCCGGGTAGGACCATAGACCACGTACGCACTGCACCCTCCATATGC	-0.320775	35	23
AAAACCCTAAACCTATACATTACAAAGGCTCAATAAACCCCAATTCGACT	2.09744	30	231
AAAACCCTACTATACGCAACCCGAATCGTCCATCCGTGCTGAGGACCCCT	-0.608457	3	1
AAAACCCTATAAACCAGTGTGCCTCCCGGCACTAGTTTCCAAAGGACTTG	-2.80568	17	0
AAAACCCTCAACAGTGTTTAGGAGTGATAATCAATGATGGATCGCACATA	-2.00305	120	14
AAAACCCTCAAGCTGCCTCTGTAATTTGGACCCGTGTGGGTGGACCAAAC	-1.60699	75	13
AAAACCCTGGCGAGTCATGTCTTGGCGGGTGTGACCTGTCATGGCAACCT	-0.608457	1	0
AAAACCCTTACAACGTCGCTTTTGTACGAGGAGTCGAAAATCTGCCGCCT	-0.608457	1	0
AAAACCCTTACTAACTCGATCGCGAAAGGGTGACACGTCTTAAACGCTGG	-1.60171	107	19
AAAACCCTTCCGAGTACCGCAATGGCCAAATGGAGTGCTTGCGAACTCCC	-0.513146	19	10
AAAACCCTTGATCATTGCAATACGAGATAGATAAGAACTGCTTTCCCGCG	-0.202991	3	2
AAAACCCTTGGGTACAGTACACAGTTAGAAAGACCCGGCCTATGCTCCCC	-0.944929	27	9
AAAACCCTTTACTGAGTTTGTTCTCCACGCAACGGTCGTCTTTCCAGAAC	-0.0179636	40	36
AAAACCGAAACCTATCACCCGCGAAACGGTCGCTTCATCGCGTGACTTCC	-0.350627	67	43
AAAACCGAAATACGCCGTATATATTACTCGCGAAATGCGCCAATAAATTG	-2.11253	8	0
AAAACCGAACGGTCACCAATATTCCCTTACCCCAAGTTGCGGCCCGCACT	0.851946	12	27
AAAACCGAATAGACAATTGTGGCCAAGGCTGTAACCCTGATTCCAAACTC	0.14251	83	88
AAAACCGACACTCTTGGCTGATATAGTACGACACCATTACAAGCCGCATA	0.800311	43	89
AAAACCGACAGCTCTCAAGCGATAATGCCGCGGAGGTTCGGTTCTCCTCT	-2.94383	61	2
AAAACCGACTGGAGACATTAAGCCAGCGAAATCACGAGCCTAGGACGCAT	-0.902696	50	18
AAAACCGAGCAACACAGCCCAATGATCCCCGGCCGAATCTATGGCAGATC	-1.93021	44	5
AAAACCGAGGCAGTAAAAATAGCTATCGCACCGGCTATGACGGCGTGGTC	-2.5779	42	2
AAAACCGAGGCGTGCCTCCGACGTACCCGCTTGTATTGAAAGCCGAACAC	-1.7306	42	6
AAAACCGAGGTCGGAAATGACAGTCGAGCAAATAGGGTCGACCTTAACGC	-0.426135	39	23
AAAACCGATAACGGCCAGTCGGGATGAGCGCGCGCATTGCCAGCACTAAG	0.712533	86	162
AAAACCGATCGGACGAGAGCAAAAAGAAAGATAAGTTACTTAGCAAGTAT	1.01685	49	126
AAAACCGATGACTCGTAGCGTTATGCGAAACCGCGGTGCCTACTACTAGA	-1.45575	83	17
AAAACCGATTTAAACGCCAGCAGTCTGGCAGCATCGAGCAAAGGCTATGA	-1.93021	14	1
AAAACCGCAACGTCGCTCCCATCACCACCACGTAGAACACAATAGTTTTC	0.434586	73	104
AAAACCGCACCATGACAGCTCTCGAGAGCACGCGTATTGCTTCCTAAAAA	-1.95219	45	5
AAAACCGCACGAGGCAACTATCTGACATTGCGGGTTGTACAACAATCAGA	0.895621	23	53
AAAACCGCAGGCAGCCGTAGTCGCCACTAAAACTCGTCTGGACCTGACTG	0.620652	54	93
AAAACCGCATAGGCAATGGGTGGAGAATATCTGAAGACGGTGTATTACGT	-1.34243	24	5
AAAACCGCCCAAACCATGTTACCGTCCAAGCATCCGGAAGGCATGTAAAG	-1.04841	58	18
AAAACCGCCCAGCGCCAACCGTCCAACACGGTGGTTCAGCTCAGAAACTG	-3.0508	22	0
AAAACCGCCCCGTGTTCTGGCTTCAGTTACGAAGCACTAGTATTGCAGAT	1.45418	29	117
AAAACCGCCCTTTATCCAATCTATCGACGTAGCTCCGCCTCCAATATTTT	0.0291207	36	34
AAAACCGCGTCCTACATATCGCGGTCTCTCGGCACCGTCTTATGCATTTT	-0.138453	4	3
AAAACCGCTACCATTCACCGCATTGGAAAATTACCGAAGGGATGCCCGGA	-2.70852	48	2
AAAACCGCTCCCCAGACAAAATAGTTTATAGGAGGTTCCAAAACTATTTC	-1.09396	12	3
AAAACCGCTGCCCTTGTGACGGGACGGAGTCACAGGATTCCTAACTCTTA	-2.33568	44	3
AAAACCGCTTAAAATCCCGATTTTGCACAACTAGCCTCCAAACGACAAGG	1.37667	24	90
AAAACCGCTTAAACCTTCTGGATCAATAGTTCCCTTCGCCAATTTTTTCT	-1.64991	16	2
AAAACCGGACTAACCCAATTGCCTGACCCATCCAGGCCCTGTATATGCTG	-1.67317	28	4
AAAACCGGACTGGGAACCCAGGCTCCGAAGCGCGAAGGTCCGGAATACCT	-0.703767	10	4
AAAACCGGCAACAATCTGCGTCCATTTGTGTCTCATCCACCCACAACATT	0.602896	80	135
AAAACCGGCACATGCCTGTTTCTTCTAACACCATGCAAGAGCTCACTGTG	0.733386	45	87
AAAACCGGCCCACTCGTGCACTTTCAGAGAGGGCGGCGGCAACGATGAAT	0.073391	88	87
AAAACCGGCCTAAAATCCATCTCCAGGGGTGCCCAACGAGCGGCTATGAT	-0.741988	31	13
AAAACCGGCGCATCGATACGTTACCATTTCGGTAGAATCCCGAGAACCAG	0.834996	16	35
AAAACCGGCTAGTAGCAGGCCTCGGTACACGACACACCGAATCAACTTTG	0.336005	83	107
AAAACCGGGATCAAAAGGGGTCGCTAAAATTAACGCACAGGCCGGTCTGT	-1.93759	67	8
AAAACCGGGATCCATCTTATGATGTCGCGAAACCTCGCTACTACCGTCCA	0.145315	47	50
AAAACCGGGGTCATGATGGACTCGAGGGGTGTTCTCTAATGTTCTACGAC	-1.83223	33	4
AAAACCGGGTCGAACCTTGGACCTGGACGATGATCGCCAATAGTAACCGA	-1.963	61	7
AAAACCGGGTTAAAAGTTATGTTGTGAGTTTCACCGCTTAAACTTTAATT	-0.941162	52	18
AAAACCGGTAACCTTCCGCTCTCTGACGTTTAATTGCCTGCTTGAATTTT	-1.155	37	10
AAAACCGGTCGTAACTTCAGCACACGCATCCTCGCAAAATATTTCTTATC	-0.439834	97	57
AAAACCGGTCGTGCCGGAACACAACTCTGTTGGATCAAAAAGTCGATAAA	1.16495	54	161
AAAACCGGTGATAATTTACATACGGGAACTGCGGGTCGCTTAGCTCGGAA	-1.0359	45	14
AAAACCGGTTACCACTGAACTCCAAAGCGTCGCCACAATCAAGATGTCAG	-1.90774	43	5
AAAACCGGTTCCCCTAAAATAGACGGTCAAGGTGCACAAAGAGTTACCAA	0.490156	19	29
AAAACCGGTTTATTACATTTGTAAAAATATAAAACTTTAGCTTTAAAAGA	1.30109	7	26
AAAACCGTCCCATATTGACCGAACCCTCGGCAGAAGAGATCTCACCCTAG	-4.10496	65	0
AAAACCGTCCGCGATGGCCAGGCGCTCGTTTGGAGTCATTCACCCTCAAC	-2.37205	34	2
AAAACCGTCTTTCGGTCCCTGTTGACGGAACCTACAATAGGGGGATGCGC	-1.6457	78	13
AAAACCGTGAACAACACACAGAGAATACGGCCATGTAGCTGGCAGCCCCA	-3.38105	31	0
AAAACCGTGACACCGGTAGGTGGCGCTCAGAATCCACCTAGGCGCTGTGA	-1.01392	23	7
AAAACCGTGACAGTTTCGCCATCCAAGTCATTAGGCCACCAAGGCGGAGG	0.0430179	48	46
AAAACCGTGCAAATCAGACCTATGAGGTCTAGCAGTATGGACCACAATCC	-1.23355	70	18
AAAACCGTGGAGGCCCCCAATAAGGTAAAACGTGCTTTACGCGATGGTCC	-0.426135	4	2
AAAACCGTGGTTTAACTAGCCTTTCTGAGAACCTTCGTGACTTATTTCAA	0.250817	82	97
AAAACCGTGTTACTCTATCGGTCTATGGATAGTTCCTAGCCCCCTCAGCA	-0.721785	55	24
AAAACCGTTATACGAGGCGCTACAAACCCGTGAGCCGTCTCAATCTTTAG	0.989808	35	88
AAAACCGTTCAACGCGGCAAGGTTGTGGACAAAGGGTGCATTGGCACTGT	-1.45575	27	5
AAAACCGTTGCCCTGAGTCATCCGTAAGCCTATGGACGTCCATCTCACTA	-1.21459	21	5
AAAACCGTTGGCGAACTTCAGTCCCACGGGAGCAACCCCCAAGTAGCTAT	0.166369	46	50
AAAACCGTTTTTCCTGCCAGGTGGTTGCAATTCCCCCCTACGTATAGGTA	-0.703767	21	9
AAAACCTAAAGTTGAACATTTTGTTCACTGCCATAAGTCCCACAGCGACA	1.49568	19	81
AAAACCTAAATCCCGGTTCGAACGCAACATACACTAATGTGCACGGGCGT	-1.7692	82	12
AAAACCTAAGAAACTAATCAGGCCAGGGCAGAGTATCCTAGTTCGAAACA	1.34237	115	407
AAAACCTACTCATAATCATATTCCTCCACGTGGATTAACATCCTACGTGT	-1.01392	14	4
AAAACCTACTCTCCAGGCAGAGAAAAACCGACTATGTGAGCGGCGGATCC	-0.192941	32	24
AAAACCTAGAGTGCCATGCCTGAAGACAACCACGTACATACACGACACTG	-2.13993	73	7
AAAACCTAGATCCATGGATTGGGAGTCATTTTGTGACGTTGCCCAAGGGT	-2.70852	48	2
AAAACCTAGCCCGTTTAAGGCCACAGAATCCAGACTAACGGCTTGCTCGT	-0.0330924	8	7
AAAACCTAGCCTGAAAGCAATCATTCCGTCCCCGAGTCCGACAACGCAAA	-0.426135	4	2
AAAACCTAGGTAACGTCTGCTGTTGCCAACCCTCTGCCCCCTTTCGCTAC	-1.13455	43	12
AAAACCTATAATCAAGGACATCACGATCGCAAACACACTACTGCTTCGGC	-0.320775	5	3
AAAACCTCAAAATGGAATGCCGTACCATATAACTTAGTATAACCAAGTCG	-1.55754	61	11
AAAACCTCACAGCCGACCGACGTCCATACCACCCACCGTACTTGTGCGAC	0.572677	61	100
AAAACCTCAGCTGTCACGGTTGACCAAGCAACCGTGGCTAAGATACGTGG	-1.16053	65	18
AAAACCTCATACTGAGAAGACTAATGCCGAACATAAGGAATGTAAAAACA	-0.436606	31	18
AAAACCTCATGATGAACGAAGGAAACTTTCAGAGCTCGCTTCGTAAGAAC	1.80746	29	167
AAAACCTCCTAGCTTCCGAAGGCATCGGTGATTTACCGGCTCTACACTGT	-1.01392	23	7
AAAACCTCCTCAAGACGGCGACAGCAACGAAATGAAAAAACGGATGATGT	-1.91679	36	4
AAAACCTCCTTACCGCTGCCTTTGGTTCCGCCAAAAATCAAGGAACCAAT	-1.78711	12	1
AAAACCTCGAAGACCAGACGGCCTATTGCAGACCGCTGCAGACTCCAAGC	0.604884	84	142
AAAACCTCGACGACGGGTGTGTACACTGCTTTTGTGCACTGTTGATTAAT	-1.70707	5	0
AAAACCTCGCAATCTTGACGCTCACCTTTAGAAGAAGGCCATTCGAGGTC	-0.392233	57	35
AAAACCTCGCAGAAGCCAATCTTTCTCCTCCTCCGTGGAACAATTAGGTA	-0.191563	57	43
AAAACCTCGGACGGTTAGCCGGTTACGCCCAACTTGAAGATTCCGTCTAT	-0.11598	10	8
AAAACCTCGTATAACAGGACACGCTGGCGTCATTTATCCTTATCGCCTTG	0.479345	30	45
AAAACCTCGTATTTCCGTTGTACATCGTTTCCGGTATGTTTAGAACAAAC	-1.99475	7	0
AAAACCTCGTTCGCATAGCCCCTAACGCTCCTCCAAGGGGCAGGAGAACT	-0.608457	1	0
AAAACCTCTCTCACGTCTGGAACAATCTGCGATAATAATTGAGCTTGTTC	0.166036	58	63
AAAACCTCTTAACAAAAATCGGGCCGTGGGCCTGTTCCAGTAGCGACCCA	-1.77161	63	9
AAAACCTCTTTACCGAGTTTGGTAACCGGCCTATGCATCAAACCCATCGT	0.280435	36	44
AAAACCTGAAATCGAGGGTGGACAATGTGAGTACCACACCCATGGACGCA	-4.42617	90	0
AAAACCTGACATTAAATTAGGTGATCGTTATCATGCATCGTAGAGAAGCC	0.307834	3	4
AAAACCTGATAGCTAGACATTAAATGTCAACATGACCATTGGTTGAACGC	-0.784347	30	12
AAAACCTGATCAGGGCATTACCTCGCACGCCTAGGTTGATCTAACTAAGT	1.30178	52	178
AAAACCTGATCCGACCTGCTTCGTGCGCCGGGTACTATATGCCTACAAGG	-0.441403	21	12
AAAACCTGATCGCTATGGGCCCCTCCACGTTGCGTTATGGCCGAGACTCT	1.33745	1	6
AAAACCTGATGAACATATCGATACATTTATGCAGCATACCAGGGTTTTGT	-1.93759	67	8
AAAACCTGATTTAAGTTCGACCTACCCCGGTTGGCGCTCAATCACCACTA	-0.350627	33	21
AAAACCTGCTAACCAACTTTCTCACGACAAGATAGTTGCGCTATCCCCGC	0.0846906	28	28
AAAACCTGGGGACATCGACTAGTCGTGCTGTGATGCCGCAATACACGTAC	-0.92691	32	11
AAAACCTGTACCGCCGTTGCATAAAACATCTGCACTGCTAATACACAGCG	2.16413	6	55
AAAACCTGTTCTCGTCTTTATCGAAACATGTGGAGGTGCATCACGTCTGT	-2.46084	50	3
AAAACCTTAGCGGTGTAACGCAGGGGAAAATCAAGAAGTCCTCCCGGGGC	-0.608457	1	0
AAAACCTTAGCTTCAAGTCCACGGAACTTGGTGGTCACTCCCGCGAATCC	0.42828	99	140
AAAACCTTAGTCCTACTCTTGGGCCGGAAGCCAAAGCGCCGAGAACATAT	-0.457634	42	24
AAAACCTTAGTGTCATGTCAGAAATTGGACCCCACCAAAAGTCCGAATAG	-0.713817	19	8
AAAACCTTATACTAGTATGTTATACTAGACCTACTGAGTTACACCCTATT	-1.03924	79	25
AAAACCTTATTACAAGATGAAGCTGATGTTGACGCCGCCAAATTGGCTCC	-2.78699	52	2
AAAACCTTCACCAGAAACTGGCGTAGGTGCACATACTCTTCATCAGGGAG	-0.00768273	33	30
AAAACCTTCAGCTGATACAAATTATTACTTTCCAAGCAGGAGGTCAGAGC	-1.01392	2	0
AAAACCTTCCTATTAGTACCTGCTTCCCGCACCGTGACGGACGTCGATCG	0.380956	57	77
AAAACCTTCGGTCCTCATATGTGCATGGATTCGTTAGTGATACTACATAA	-1.01392	2	0
AAAACCTTGACCCACAGTCTCGAAATCCTAAGGCAATTAATTCCAAACCT	0.743936	29	57
AAAACCTTGCACTTCCTACCCTCCAGTGGAAGACGCTACTATAGACCAGG	-0.218992	41	30
AAAACCTTGCGATTCACAAGCAGCTCGCTCCGACTTCAAGCATGTTCTCC	0.053438	64	62
AAAACCTTGTAATTAGCGCATCAACGTAGCACCCAAGTGGCAGCGCCATC	0.174303	31	34
AAAACCTTGTGCCTCTTTCTTCTGACCATATGCGGATGCGGAGAAAGTGC	-0.503096	8	4
AAAACCTTTAAAATCGAACGACGAAACCTTCCCGTGGGGGTGACAGTCCA	-0.762607	55	23
AAAACCTTTCGCGCCCACCGGTCGCAATGAGCAAGTAAGGTTCTGTTGAT	-1.46021	74	15
AAAACCTTTCTAAAAATGGACTCGCGGGCCTAGGAAAATTGTTAGGTGAG	-1.01392	26	8
AAAACCTTTGTTAAAAAAAACGTTCTGTATCAAGTTGAGCGGGCTCTTCC	-1.64991	33	5
AAAACCTTTTACACGACACAACGCGAACAACTATGGTGGCGGTTGCGTCT	0.042131	95	91
AAAACGAAACATAGCAGTAAGCAAGCGAAAGACTTGACGAGCAGCCCGTA	-0.608457	1	0
AAAACGAAATCACGATGGCGTTCATGGAGGCGGACGCAAACTAGATATGA	-1.95219	91	11
AAAACGAAATGGGCAACAGTATAGCTATCACCATTGACTCCCCGCAAACA	1.06552	23	63
AAAACGAACAACACTATATAGCTGACGAGAAAACGTACGCTCTCCCCGCC	2.06224	39	288
AAAACGAACAATGGCTCTTAATACTTTTTGCGCAACATATCTCATGAAAC	-2.04354	41	4
AAAACGAACCCATACAGCCCCGTTGCAGCAATGATTGCCTCGACAACAAA	-0.88039	41	15
AAAACGAACCGTTAACTAGTTAATCGGGGACTTTTAGACGCGACAGTCCA	0.644306	39	69
AAAACGAACGACATCGGATCAATTCTTTAGAATAACGCACAAATTAAGTC	0.837027	40	86
AAAACGAACTCTTCATTAACAAACGCGCCACATTAACATCACAACCGTTC	-0.162169	31	24
AAAACGAAGGAGGGCATCAGCGCCTCACCGCTCGTGAAAACGCTTGCGGT	0.459384	21	31
AAAACGAAGGGTGCACTAAAGAAGGGGTGGTTTAGGTACCCAACTCATGC	-0.939814	38	13
AAAACGAATACTATTGTGCACTAACGTTGTGTTTTATAACCCTAGACTAA	1.05604	52	139
AAAACGAATAGATTCTATCATGACCCAGAAGTGCTGTACGAATGTGCAAT	-1.45575	41	8
AAAACGAATAGGGTAGTCTGATGATTTATCACTATAACATCGCAGTAAAA	0.75374	20	40
AAAACGACACCCTGCGACAAATAAGAATGCGCGGGTACGTCCGCATTAGT	-1.329	36	8
AAAACGACATCCGCGAGCCAGTAACCCCCCAACCACCTGACTGACAATAC	-0.242522	85	61
AAAACGACCGCCAAAATATGAAAACATATTCAGATGCCAGGGGTCCACAA	0.0221702	32	30
AAAACGACCGTCAATCTCAGCACCGCCGTAAGCTGAAACGTACTCTCGTC	1.45774	37	149
AAAACGACCTAAGTTACACGCGCTCAAATAAGAGATCCGCCAAGTCCAAC	0.975415	102	250
AAAACGACCTCCGCTTCCCTGGCAATACGGTAAATCCTCTGAGGCACGTA	1.14556	35	103
AAAACGACCTCTCCGACCCATATGACACGACTGCAGAGGACCGACAACGA	-1.6261	82	14
AAAACGACGAGATGCGCCCACACCTGGGATTTAATGTAACAATCAAATGG	-1.66451	68	11
AAAACGACGTGCTGCTTTCCTGTCCTAAGGCCCGCCCCCTGCAAATGTGG	0.143879	81	86
AAAACGACGTGGCAACTCAGTTCAATCTTTTTCCGTTTCACCTTCGCCCA	-0.0694601	6	5
AAAACGACTCAAAGACACTCTTACCGCATCAGCACTACACTGGCTACAAT	2.24922	37	330
AAAACGACTGCACGAGGCGCGACCTCAACTGGCCACGATAACATCGTTAG	-1.20316	57	15
AAAACGACTTGTACCAGCCCCATCTACTTTTTTCCGCTGACGGTCACTAT	-0.92691	21	7
AAAACGACTTTCCCCATTAAATCATGCAACCAAAGGGATACCGAGCCCGA	0.10531	47	48
AAAACGAGAACCTTTGCGCCACACTTGACTCCATCCATCGGTAACGTCTC	-1.44679	73	15
AAAACGAGATAGTGGTAGGACCGCAAAGAACTCTACGTTGCGCGCGCGCT	0.336005	34	44
AAAACGAGATGGGAGGACAAGAGGATTTTGCGAATGTCGCTGACCGAATA	0.0969607	80	81
AAAACGAGCATCTACACGCAACAAGTCACACCGTAGAAGGTGCAGGGTGC	-0.991449	43	14
AAAACGAGGACAACAGGTCATCCGAGAACATCGCGCGCCCAGACTATATA	1.10954	74	208
AAAACGAGGATCTCCTACCCCAGTGAGTGGTAACTGTCCGCGTGTGCTTT	-0.848736	205	80
AAAACGAGGATTCCACAATCCGCGCTAGACGAATGCAAGTGATCGAATGA	-1.63808	55	9
AAAACGAGGCAAGACCCAGTGATATGAAGAGTGGCGAATATGTTAAACGG	0.171702	32	35
AAAACGAGTAAATAAAGAGGCTAACCTGTTCAAACGCAACTGTAATGAAT	-0.92691	21	7
AAAACGAGTTTCGCCAGAATGGGCGCCATAACGGAAGCGCTAGGAAAACG	-1.47345	56	11
AAAACGATAAACTACACTCCATTGGGATGAAATAGGTTCACGTTCCTGAT	-2.26668	41	3
AAAACGATAAATGCCCTGCTGATTGTATCTGAATTTCTCCCACGTATCCT	-0.510017	28	15
AAAACGATAACCCTAGTGGTTATGTCTTTGCCCCTGATGCAGCGAGTCGC	-2.35766	45	3
AAAACGATAATTTCGACAGCATGTGCGAGACTCGCAGGACTCAGTCCGCC	1.04253	32	85
AAAACGATACAGTAGTGGAGGCGCGGGACGAGACGCAACCTCCGCCCGCA	-0.608457	111	55
AAAACGATACCAAGCAGGCAGGATCACCCATACACTGTTGCACTGCGGAG	0.877627	80	178
AAAACGATACTCGAATGCAATAGAGACCCTGTCGTTCTCTTGCCGTTACC	-0.268131	36	25
AAAACGATAGGTGAGCCAATTCAGTTGGCGCACGAGTTAGCGTTCCCCAA	-0.959854	53	18
AAAACGATATGTCAGATCGCGGGCGACGAAACTCACTGGGCCGACATCGG	0.0846906	2	2
AAAACGATCAAATCCGTTAGGGCGGGTATGCTTTCGTGATCCATTTGGGA	-1.38165	77	17
AAAACGATCAATGGTCTTACAGACCGTTAGCTGCACTTAATCTGGTTGTA	-2.48026	12	0
AAAACGATCCCAACGAATCGAAACTCAAGACCACCAGACTGAGGACAACA	2.2182	17	151
AAAACGATCCCTAAATATAGTGTGAGTCCACACGTCGTATACCCAGTCAT	0.81866	59	124
AAAACGATCGTCGTTAACTCATACTCCTACAGGGAAAAAATTAACTGATG	1.39866	42	159
AAAACGATGATCCAAAATCATAACTTCACGATCTTACATTCCTACTCCCT	0.690826	35	65
AAAACGATGGAAACGGCATCTATCCGGGCACGGAACTTTACAAACCAGGT	-0.506178	64	35
AAAACGATGGTCTTACGTCCCATCAATCTAATTCTTGAATTTCCGTCTAA	-0.0170921	30	27
AAAACGATTCACATGTTGGACTGAGTCGGCCGGTAATAGAGCAGCAGGAC	-1.99475	39	4
AAAACGATTGGGTCTTACAGGGGCCACAAGAGTAGATGTGGCTCCGTCTC	-0.637444	34	16
AAAACGCAAAAAATTGTTTGTAGTGTTTAGTCATATACTTCGTAGGTCAG	-0.896139	23	8
AAAACGCAAGCCGAACGCCTGTCGTGAGTTTAACAGTAGCATCTTCCAGT	-0.219521	60	44
AAAACGCAAGTTCATCTGTGAAAAGTAAGTACAAGTGGATCCCTGTCTGC	-1.01392	32	10
AAAACGCACGCAATACCAAGAGACAATTGGTATTCCGTCCGTGTGAGTGA	-0.8316	79	31
AAAACGCAGATACCGGGCGGCCCAAGTTGGTCGCTAAGCGTTTGCTGCAC	-0.991449	43	14
AAAACGCAGCTGACGCTCCGCACGCGCCTTCTTTTTTAGCGGCTACCGTG	-1.3016	3	0
AAAACGCAGGCCACCTCCTTCGCACGGGGTTGTGGACTGGCAGACCCGTC	0.00130898	49	45
AAAACGCAGGGCTTTCTTACGTACCGGATAAATGGCTCGATAGCGTTGCC	-1.35039	83	19
AAAACGCAGGGGAGATACAGACGTTTTAGAACCTCCTCCTAATCCACTCC	-1.36223	16	3
AAAACGCAGGTTTCAAATCAAGTCCGCGAATGTCGCCAACGTTCCCAGTC	0.523604	48	75
AAAACGCAGTGAAATGACGATCAAAGACTTGGAAAGTGCACAATAAGAAA	-0.225464	29	21
AAAACGCATCATTTCCTAGTGAGACCAGACGGAACAACTGTGGCAGGTGG	-0.198029	133	100
AAAACGCATCGTACCACGCAACGTGCCAGGCACGGCCCTACCGCCAACGT	-0.474925	13	7
AAAACGCATGAAATCGGCGACATGCCGGATCAAATGTCTGACTACAGCCC	-1.66451	22	3
AAAACGCATTGACTTCCAAAGGTTCCTTTCGACCGTAGACTAAGCGCAGC	0.868534	78	172
AAAACGCATTTTTCCAATATGTGCTAGCAATCGGGCCGTCACAGCCCGGT	-2.72872	49	2
AAAACGCCATCGCCTAAGGGTCGCTTTGGAAGCTTATAGGATACAAAAAC	0.559149	55	89
AAAACGCCCAGAACGCGGCTAAAGTCTCCGGATTAAGACTTCCCCACCAT	-0.876721	33	12
AAAACGCCCCACTCGGACCTTACGAAAAGACCGCTTGAAACTACCACGGC	1.57635	17	79
AAAACGCCCCCTGGCGACTTTAACCCTAGTGTAATAACAGCACTTTTCGA	0.212524	21	24
AAAACGCCGCCCCTACGTACCGCTCAGTTGAAAGAGCCGAATACATTATC	0.490156	87	131
AAAACGCCGCTCACCCGCGTCACCTTGCTTCATCCGTGCGACGCGCCTCT	-0.0584103	14	12
AAAACGCCGCTCTGTTTGAAGTTGCGATGCCGGTGCCTGGTACGCCCGTA	0.380155	31	42
AAAACGCCTACCGCAGGCCCGAAAGGAACGCGTCGGTCGCGGACCTTATA	-2.11253	98	10
AAAACGCCTAGCCTAACCCCGCTTATGCGTTACAGAACTGACACAAATTC	-0.585984	87	44
AAAACGCCTCGTTACATACACAATCTTAAAAAATTGGAAAAAATAAATTT	1.71611	8	45
AAAACGCCTGAACCACATAGTCAAAGGGACCAAGTTGCTACGCCCTTTCG	0.270408	48	58
AAAACGCCTTAAACGAACTGCTTGACAGGAGTATCGAGGGCCGTCGAGTT	-0.648462	101	48
AAAACGCCTTCAACCTACACCCCACTTTAACCAAAAGCGGAATCTCCTCT	-0.608457	1	0
AAAACGCGACATGTTAGATCGACGAGATAATGCCAGAACCACCCAGACTA	-1.77853	57	8
AAAACGCGACCAGTGGCAGCTGAAATCCCCACTCGCTAGGTAGCGAACTC	-0.961278	36	12
AAAACGCGACCCGAACGGCTCCGAAATCTTACTTCGCGCAATCCTACAGT	0.434364	85	121
AAAACGCGAGCCGGTCCCAGCATATTAAAAAAACGATAGAAGATAGTGCA	0.506685	39	60
AAAACGCGAGCGTCGTTCGCTACGTTTTCGTTAGACTGATACGAATCTTA	-0.536483	66	35
AAAACGCGATCAACCGCTGCTTGATAGACGTGGATCGACTGACTTCACTT	-1.52475	19	3
AAAACGCGATCGATCACATCTAGGACCTCCAATCTGACAGACGGTTGGAG	-0.312191	57	38
AAAACGCGATGCTGTAGACTGTTACCCGTCTAATGTTAGCGGAACATTCT	-0.86439	30	11
AAAACGCGCTTCCGGAGACTGTAAGAGAAAGGTGACAGTTCGTCCAATTT	0.0105826	13	12
AAAACGCGGATGCAGGCCGTCCACCGGACCAAGGGCTGTACCGTTAAAAC	-0.748219	91	39
AAAACGCGGCTAGGACCGTTAGCTCGTCCACTCCAGACGAGAATATGCAT	0.340624	47	61
AAAACGCGTTGGCTACCCAAAGGTCGTCGGGCGAAGCATCTTCACCTTAA	-0.608457	41	20
AAAACGCGTTTTCAGATTCTCCTATGACCCAGAATTGATGAAGCTTCTCT	-1.52475	14	2
AAAACGCTAAATCGTCCCATTTGAAGAATAATTGTATTTAGCAATTTGAG	2.16135	44	358
AAAACGCTAATCTTCCACACTGTTCGCACTAAATGGACACTTGCGCCCTA	-1.70707	11	1
AAAACGCTACACTCCACCAGTCGACTTACATTGACAGCAAATTCAGTCGC	0.957179	27	66
AAAACGCTACCCACACCAATACGATGTGAACAATGACATAGACCCAGGAC	-1.52475	4	0
AAAACGCTATGTAATGATTCGTTCAGATATCATCTACGAGGGCTAATGTA	-0.672995	31	14
AAAACGCTATTATACTCCCAACACACGGTATGGGCTGTACCTCCCTACGG	1.11431	9	27
AAAACGCTCAGTAAATGTTACTTAACCGGTGCGCACCACTGTCGTATGAT	0.479684	63	94
AAAACGCTCCCTGCACACAATGCACAGACCTCCGACATGGGATAGCGTGC	-0.264685	77	54
AAAACGCTCGATATTAATCCAAAAACCATAAATGGCACCTCGTCAACTTT	-1.43514	31	6
AAAACGCTCTCCCTCTTCCACTAATCGAGGGTCTTTTAATACGGTAAAAA	0.482551	87	130
AAAACGCTCTTGGGGCACCTATCCTTGATCAGCAGCCGGTGCATGCCAAT	-0.243813	24	17
AAAACGCTGAGCCCGGTCCCTTTCCGAAACCCGCATCCCATTACTCACAT	0.23624	54	63
AAAACGCTGGCTCAAAACATCGCTAGCGCTCCCTCGGTCAAACTCGTGAA	0.484291	56	84
AAAACGCTTGTGACGGTCCCCCTCTGAGAGACATAGTGCCGCGGTGGCGA	0.0846906	50	50
AAAACGCTTTCACACAAAAACTCTGACACTTAGGGTACTTATCTCGGCAC	-0.403662	43	26
AAAACGGAAACGAACCTTTTTGCCATAGCAATATTCACTATATGTCTTGA	-0.352523	47	30
AAAACGGAACAATGTTAAGCTGCAGCGCAGTCTCTCCTTGTCGGTCCGTC	0.589786	34	57
AAAACGGAACGTCAGACGGCTACTCGCGAGAAAAACCTAGTTATCCCATA	0.259895	93	111
AAAACGGAATTAGCATAATCAATGGTGCACAGCTTTTTAGCTCGCCGAGC	-1.58302	52	9
AAAACGGACCGATAGCGGGTAATCCTAGATGAAATATACATATTACATAT	-0.92691	43	15
AAAACGGACCTTCAATATCTAAACGCGCCAACACTTCGCGTTGTCAGCAC	-1.11928	29	8
AAAACGGACTCATACCACAGTGTTCTGATACTTAATAAGGTCGGAGATAC	1.22048	43	136
AAAACGGAGCTCAGACAGCAGTACTAGCATCCCGTTTATCCCAGCATCCG	0.390072	27	37
AAAACGGATACAAACACCGTCCACTACATTGTGACGCATCTCCAGTCCTT	1.55012	84	367
AAAACGGATGCTCCCCGATACCAGCCCAATTCTGATATTCTGTACCATTG	-1.4279	58	12
AAAACGGATGGCATTTATGCGCAATCCCTAACCAAGACTGCAGAACTGGC	-2.13315	146	15
AAAACGGATTGATACCAATAGGGGCGCGCTAGTGATACTAGGACACTGCC	-1.03454	48	15
AAAACGGATTTGTTGCTGAGCAATTGCCCGGATGGCTTCAAGCCATCATC	-1.01392	11	3
AAAACGGCAAAAACTCACTCCGCCTTTTCCGCCCAACATATCTCGCAAGA	1.53998	76	329
AAAACGGCAGAAAAACCCCGATAGCCCCGACTAAGGGAGATGGAGCACGT	-0.320775	20	13
AAAACGGCAGTCACTCCACATGAACCTAACGATCTATCACATAGCCGTGC	-1.89137	100	13
AAAACGGCCGAGAGAAAAGTTAAAACCACTAAACGATTACTGCGGCATAG	1.1833	34	104
AAAACGGCCGATTTGTAGGGCTGCCCGTGACGGGGATGTAGAACTTAGAG	-2.09384	52	5
AAAACGGCCTGTATAACTGCTAAGCACGTGAAGCGCATTCGCGCCCACTC	-1.24654	52	13
AAAACGGCGAAGCTAGACCGGAATGTCATTCTTTTGTCGTTGGCTCGCGG	-0.956763	50	17
AAAACGGCTCCGTAAACGGTATTGTATTGATTGATGGTCTGTGCTGATGT	-1.59707	42	7
AAAACGGCTCGCGTAGTAAGACCAAACAAAAATCACCACCGGTATGAAGC	-0.320775	2	1
AAAACGGCTGGATCAAATAGAAGGGGCTTGCAACCAAATGCCGGACTATA	-0.790778	23	9
AAAACGGCTTGCACTTGCGGTGGCTATTGCCCCCTTCGCCGTCAACAAAC	-1.46287	46	9
AAAACGGCTTGTTTCGCCACACTTGAGAGGATCTACAGATGAAATCCCTT	1.29129	37	126
AAAACGGGAACCCGAATTTCAAATCCTCCGGGCCGTAGTTCGCCGCCGTA	-0.853579	45	17
AAAACGGGACTAAAACCGCGCGCGCTAGGGACAAAGGTGCTTCGCTACAC	-1.63296	77	13
AAAACGGGAGCTGCCCGCGTCGGACGCGAGTGACATGAAGGGACAAAACA	-1.41939	26	5
AAAACGGGCCCAACCACAGACGACTGGGTTCAACAGTGTAAATAATCCTT	-0.608457	1	0
AAAACGGGCGCGATTTACGGGCTTGAACGCTGAACTCCCAACTCATGTCG	-1.35039	41	9
AAAACGGGCGCGTGACTCATAGATCACACCGCTAAAGTGGCTCCATGTAA	-2.21789	9	0
AAAACGGGGAATTAACCGCTTAGATTATGAACCTTATGCCGACTGAAGCA	0.828269	28	60
AAAACGGGGCAAGCCTCAAAAAGCCCGACGAGTTCTAATTCCCCAAGAAT	1.80234	13	77
AAAACGGGTACCAACATCTATTCAACCGATTTGAGAACGTGGCGCTACAC	-0.122949	31	25
AAAACGGGTCAACTTTATCGCTGCGACCGTGCCTCAATAGTCCCATCCTC	1.11431	9	27
AAAACGGGTTTAAACCATGGGTATATAGCTAATACCTAACCTAGTCGAAA	-1.01392	35	11
AAAACGGTAATATAGCTGTATATGCGTCGCGATGAAGACTTTGAGTAAAT	-1.3016	19	4
AAAACGGTACCCTCCCACAACTTGAACATTTTAAACGTACAGTTCCAGAT	1.3031	54	185
AAAACGGTATGGGGTAGCACGTCTAACCGAAGTTCCGGGCCAAGGTCTAA	0.0846906	3	3
AAAACGGTATTAAGTTGCCGTCCCAGTGCCCGACGCAGCTTGCTCCCCTT	-0.98002	28	9
AAAACGGTATTGGGCAAAGCGATTGTTCCACACCCAATTTGACGCTAAGG	0.777838	92	185
AAAACGGTCCCAAGACCGAAGAACTAACCCTAATAAAATGTTCTACGATA	-0.946911	100	35
AAAACGGTCCGTGCTCCTTTGTCTGGGCAGAGTCCTTTTAAGGCCCCCTC	-1.32222	48	11
AAAACGGTGCTGAGTCCGTCGGCATTTACTGCAATTCGAGGCTGATACGT	-0.474925	55	31
AAAACGGTTACCGACATGTAAGACGGAAAGCCGACACAAGCCTTAATGAG	-0.665615	35	16
AAAACGGTTATATTATCTCTTGTGGCGTAATGAACCTCCCTGTAATATCG	-1.67317	28	4
AAAACGGTTCAGACACAATCATTGCCCCGTCATGTTTAGGGCCTAACCCG	-0.426135	44	26
AAAACGGTTCCTCCTACCTTTTACCCGGCTGTGATATTTCGAGTGTCATT	1.22982	13	43
AAAACGGTTCCTGTGACAGCACACATCTGATAATCATGCCACAGACGTTA	1.15389	45	133
AAAACGGTTGAGCGCAATTAACGGAGGTCATAAGGTTCGGGGCTAAAACA	0.85788	17	38
AAAACGTAAAAGAAACCGCGACTCGACGCTGCAACCCATCCTAGCACTAA	0.991635	85	212
AAAACGTAAAGTATAACTTATTTTTAACTCGTCCGAACAAAAACCGACGG	0.13975	52	55
AAAACGTAAGGGTCTTTTCTTTAAAGGTGATCTGAATAACGGCCTGGGAA	0.942141	55	131
AAAACGTAAGGTATTGGGAGACCCTTCACAATGTGCGTACAACCCCCCCC	-0.521445	43	23
AAAACGTAATACGCCGCTTTCTGTACAAGGTAGCCGCGGAATCCGCTTTG	-2.57207	56	3
AAAACGTAATAGACTGTCATAACCCGTCTAAAAGTAATACGATTCAGCGA	0.944892	10	25
AAAACGTACAACCATAACTGTCCGTGAGACCTATATTGATTCGATGGGAT	-1.52475	34	6
AAAACGTACACAGTACCCTGGACTCAGACAGTACTACCTCGACTTGGGTG	0.134701	77	81
AAAACGTACACTTCTCGTACAATGGTGTGCATTGGCGCTGCTCTTCAAAA	-2.50558	39	2
AAAACGTACCTTCGCCGGCTCCACAGCGGTATCGCCTCGATGAACATTAA	-2.62336	14	0
AAAACGTAGATTGTGTCCCGAAAACAGGGGGAGATAGTACTGAGTCGCTG	0.363404	27	36
AAAACGTATCATCAAAGAACCAACAGAAGCCCTTACCATTAAAAAGTCTG	0.651086	20	36
AAAACGTATCATTAACATTACGTTCAAATACCTTTGGCGGTATGGCCATG	0.682528	43	79
AAAACGTATGGGTCAGCGAGCCCCGCGCTGGTAGCCCCAATTCACTAGCA	-1.94346	37	4
AAAACGTATTCCACACCTCCCACCATGAGACTGTAGCCTGCCACACATTA	-1.09396	103	31
AAAACGTCACCGATATTAGCACAGACATATGTGTCGCGGCATGCAATGGA	-1.63136	88	15
AAAACGTCCCTTCACTAGTCAACGTCTAGAAGTCATGTGGGTCCGGGCCC	-1.50924	63	12
AAAACGTCCTCCCACCGGCAACTGGAACCCTAAGTTCTTCATATAATAAG	1.29274	48	163
AAAACGTCGCTCCTCACCAGAGTATCACAGTGGATCAAAATACCATTACC	-0.00341668	82	75
AAAACGTCGGCTTTTGTTCATGATACAACGCCACCACAGTGTCTCTAGAG	-0.177674	38	29
AAAACGTCGTACCAAAGAAGAGCTATCTGGAGAAATTAATAAGGCGGACG	0.942141	69	164
AAAACGTCGTTGACCGCTTAATGAGCAATCTGACAGGCCAACAGCCAAAG	1.00098	27	69
AAAACGTCTAAAAGGCAATGATCCTTGTTCATCCCTGCAGTGCCCCCCAC	1.00928	47	120
AAAACGTCTAAGGGTCCCTGCATACAGTCAATCTTTTAAACGTGTCACAA	1.50914	44	186
AAAACGTGAACCACCCTGTTCATTGATAACCTTTTCAATTCTTTTCTCCT	0.0846906	2	2
AAAACGTGATCGCTGTCGTCCACGCTCGACACACCCCGATCTCCAGGGAG	1.81929	2	16
AAAACGTGCTTGTTCCACTCAGGATATAAGACCTAAGTATAACCTCCAAC	1.40962	20	78
AAAACGTGGAAATACCATCCCTCCCAGACGAATCTAGGCTGGTGCCCCTG	-1.78711	38	5
AAAACGTGTCGCGCAAGGGGACTTCAATACCTGCGGCTTCAGACAATATT	-0.608457	7	3
AAAACGTGTCGCTCCGAGTCGGAACGGTTTAGGCAGAATAATAAGCTTAT	-0.698069	34	15
AAAACGTGTGCCCATACAGTCGATAAATCGCTTAACTACCAGATCACTCC	1.55103	35	155
AAAACGTGTGCGCCGCTGGGTTTTGCTGGAATAATTCCGAACGTTAATCC	-1.86122	20	2
AAAACGTGTGTTTCATAACCTCGTGGATCACGCGGCCTCTTTGTCCACAA	-0.78281	99	41
AAAACGTGTTCCCGTTCCGTACTCTACTTCTAGCTATTTATAGCTACACC	0.982201	85	210
AAAACGTTAAGAAGAAGTTTGCCAAACGCGCGCTTAATGAGAACCCCCAG	-0.953297	47	16
AAAACGTTACAGATAAACTCTCACAAAGTACTCAAGGTCAACTCAAGACA	1.51624	53	225
AAAACGTTACCAACCGTTTACTGGTCCGCCGGACAGATTCTCACAACCTG	0.19389	77	86
AAAACGTTACCTTCTACAGTTGAGACGGTTGGGGTCTGGGGTACTTATCG	-0.730346	60	26
AAAACGTTATAAATCCCGCCTTCCACTGACCCACGACGCGGTCACACAAT	0.0846906	43	43
AAAACGTTCGCCGAACTGAATAACCGTAATGATCGGCTCCACACCTTGCG	-1.01392	2	0
AAAACGTTCTCGGAGTTCCCCAGTAATGCGTAACATAGTCAATCCCTACA	-1.70707	23	3
AAAACGTTGATGAAAATATAGTTAGCGTCTCGGTAAGAAGCTCCGCACTC	-1.3016	15	3
AAAACGTTGCATCTCCCCTCACAGGGTCGACTGGCGCGTTGGTCCGATAA	-2.85975	18	0
AAAACGTTGGCATCGGGACGAGCTAATAATCGGAGGAACAAAATCTTCGG	-1.3016	3	0
AAAACGTTTACCTGTGTCACTTACAAGGCTAATTTAAGCATACCTATATG	1.58877	57	260
AAAACGTTTATACTATTATCCAGGCCTCTCTTGGAATTAGACAAATGCCT	0.669204	33	60
AAAACGTTTTTCGACTCACGCTGTATCAAAAACTAGAATCCTATTTTTAT	1.26026	24	80
AAAACTAAAAAACCTGATGCGAGCATTACACCTGTGTAAGCGACAGCGCG	-1.45064	64	13
AAAACTAAAAAAGACAAGGTAGCCAAAATTTATTGATGGCATTACAGTCA	1.54977	60	263
AAAACTAAAAATTATAGGGAAGCAACTGCTTGCCATCACCCGTCGCTTAC	-0.8316	4	1
AAAACTAAAACCCAGCGGAGGTTCCCCACCCCTGGTGGCAGCCTCGCGGA	-1.08538	28	8
AAAACTAAAATCAACACCATCTTGTTCCCCTATTGACCAATCGTTTAGTT	-0.255635	51	36
AAAACTAAACACGATACGCAGACAGTCCTGTATTCTGCAATGGCCTTACG	-0.503096	44	24
AAAACTAAACACTCCGTCGCACCTCTTAGTTTGGTCGAAAACTGAGTATA	0.421163	14	20
AAAACTAAACCCCTCAGGGACGTTGTGCGTCCTGGAAAGTCGAAAGTACT	-0.333045	40	26
AAAACTAAACCGGACGTTGCTTGATAATACTCACATACACACTTTCCCTT	-0.0354537	52	46
AAAACTAAAGGGAGTTACTTTAATAAGCCCTGTTGCTACTAACTTAATAG	1.13238	46	133
AAAACTAAAGTTACCAGTTAAACAACGAACGCGACCACAACAGTGGAGAT	0.459384	32	47
AAAACTAAATACACAGTCTACGCTTGGTAAAATGGAGATAATACGGATGA	-2.24259	81	7
AAAACTAAATGACCGCATGACCGCCAATGTCGGTCTCATTGTGGTGCCTT	-1.86122	27	3
AAAACTAACCCCCAAGACACGAGATCTCGTTGATACTCCTGAACACTGGT	1.37436	37	137
AAAACTAACCGCTCCGACCCACGTACGTAACCATGCCTGGCACACCGTAC	0.525002	46	72
AAAACTAACCTAACCAGCTCGCCGAGTCTGGTCGAGCCGGCATGACGTGT	-1.36223	67	15
AAAACTAACGAGTGAACGATTGGTTTAGTGCTTACCAGTACGCGACAAGC	-2.6879	31	1
AAAACTAAGCAGAAAATCTTCTCAAAATAAGTCAAGAGGCATGCCGCTTA	-0.649279	49	23
AAAACTAATTATGTACGAGCACCCTACTATAGGTTGCGACTTCGCAGAAA	-1.78711	51	7
AAAACTAATTGAATGTGTGGCCAATGCCGTCACGCCCGAGCGTTTTGAGT	-0.151698	18	14
AAAACTACAATAAACAGGAACAAGGTTATGTTTACGAGTGTGTGGCTACG	-2.1666	56	5
AAAACTACACCAACGTTCAACCAAGTTCAGGCAAAGTGACATTACTCGTA	1.52571	39	168
AAAACTACAGTTACAATGCGAAGGCTCAATGTCGCGCACCAGCGATCAGT	-1.77161	63	9
AAAACTACCAACTACGCCATAGGGCCAGGTAGAGAAAAGTGACACTCGAC	-1.82485	53	7
AAAACTACCCAAACCGTGGGACGTTCCGCCCAAAGATATCCAGCTCTCCG	-0.320775	8	5
AAAACTACCCAAGAACGTGAAGAGGCACAAGTATATGGGAGGTACGGGGA	-1.25904	45	11
AAAACTACCCCCATACAAAGATGATCGCCATACTCCACATGTGAACTGTA	-1.01392	2	0
AAAACTACCGGCACCTGGTGTTACATTGTACGCAAACCAGCGCAAACCTA	1.14446	69	201
AAAACTACCTGAAGGTTCTAGCCAGGTGTTGTAGCACAGAATACCTCTTA	-1.40339	30	6
AAAACTACGAAAAAAAAACCTTTAGAGCAGGCTTATTGCCCCTTACTCTG	1.10106	37	104
AAAACTACGTCAATTCGAGGAGAAACTGCCAAGTTGGCGTGGAAACAAGT	0.465705	68	100
AAAACTACTAACACCGTGCGCGGCAAAGGAACAGGCTGACTTATACTCCA	0.821188	78	164
AAAACTACTACCATTGGATCCGCAGGTCCCCCTCTAGACCAATGGTACTC	0.345906	66	86
AAAACTACTATAGAGACAGAAAAGATGCCTGAGTTGGCCACGCTACGACT	-1.36614	63	14
AAAACTACTGACACAGCCAAGTCATCGCATGTACTCTGCCCGCCTCGATA	-0.8316	24	9
AAAACTACTGCAGATTAGGTATCCCAACAGTGGAAATTCCCCAATTGGAC	0.503401	49	75
AAAACTACTGTAGAGCTGCGCTCCGGTACGGATAAGACACTGTCCGTGGC	-1.88475	42	5
AAAACTAGAGGACACTGGCTTGCGGTGAATACTCCGAAATGTGACCTGAG	-1.83013	94	13
AAAACTAGAGGATAACAACATGAACAGGGTGTTTAACAATGGTGAAGTTA	-1.52475	19	3
AAAACTAGCAGATAGCCGCTGAGCAGTCAGTCCGAGACTGTTTAAGGCCC	-0.916758	48	17
AAAACTAGCGAAATCACAGATAATAATCTACTAATGCGGGGAGTCCAGGG	-1.42944	49	10
AAAACTAGCTTAAGAAAGTGCAAAGGGGAGACTGGTCTAACCCCAAGATC	0.401028	42	58
AAAACTAGGATCTTACGAAGCGTTCTGTTTGTATATATTTCTAAGTAATG	1.37382	53	195
AAAACTAGGGTTCAACCGCATGGTATTAGGAGAGTTTACTGCAATGCCCC	-3.92264	54	0
AAAACTAGGTGTGAGAGTGGGACCTCATTCGCTCTGCGAATCGCTCAGCA	-0.529676	60	32
AAAACTAGTAACGTACGAACTTTCTCGGTGAATCGTTCTCGCTAAAAGAT	1.03273	30	79
AAAACTAGTACAGAGGCCATCCTCGCAGTCTCGCTTATCCGTTATTTTGA	0.564264	12	20
AAAACTAGTTGGTCTACCCACCCGGGTACCTACCAATCGGACTCGCACAA	-0.797699	57	23
AAAACTATAAATAGGGCAGTTAGGAATACCACTGCTTGGATCGAACATAT	-0.426135	59	35
AAAACTATAGAGAGACAGCGTTTCCGTGCGGACTAGCATTCGGCGCTATT	0.456633	90	131
AAAACTATATTTGTCCGAATTACCATACGTGTTTGATACAATGTATCAAC	-0.510017	57	31
AAAACTATCGCGAGCCATACGGTGTAAAGGTTGAGACCACATGTTCAGCA	-1.07846	31	9
AAAACTATCGCTAGGGCATGGACCTAAGCGGTACCACTGCCGGCAAGTTC	-1.22026	58	15
AAAACTATCGGAGCGCTGAGAATGGCGATCTCGAGCTGATAGAGTAAACA	-1.37683	68	15
AAAACTATCGGCGGAGAAAATTCACCGAAACGGTATGCCAAACCACATCA	-1.16807	41	11
AAAACTATGACTCCAAATACCGACAGCACACAACACACAGTTTGTGGCCA	-1.52475	4	0
AAAACTATTATTCTAACCATCAAACCGCGCAGCCTAATAATACTCACCCC	0.530978	31	49
[truncated: 487,350+ more rows]
