# Supplementary material for: Deep learning of the regulatory grammar of yeast 5′ untranslated regions from 500,000 random sequences
Source: HighWire-hosted journal article supplement (doi:10.1101/gr.224964.117), 2017-11-02
Supplement: Supplemental_Table_S2.xlsx [file Supplemental_Table_S2.xlsx]

## Sheet: Kozak_scores
Supplemental Table S2. Mean enrichment scores for random 5' UTRs containing specific -5 to -1 sequences
ACAAG	0.176061
CAAGA	0.0462008
ATAAG	0.0276492
TCAAG	0.0168545
GCAAG	-0.0582784
CCAAG	-0.0826235
TAAAG	-0.0893956
TTAAG	-0.102931
TAAGA	-0.111621
AAGAT	-0.119956
CAAGG	-0.121022
ACAGT	-0.134171
CTACA	-0.139963
TAAAT	-0.150801
AGAAG	-0.157186
TAGAC	-0.157233
ACATG	-0.160048
TTACA	-0.163315
AAGAC	-0.168694
TAGAT	-0.170022
TACAA	-0.170375
ACATA	-0.179575
CTAAG	-0.180732
TACAG	-0.181802
AAAAC	-0.182758
CAAAG	-0.183228
ACAAC	-0.194136
ATACA	-0.2013
TAGAA	-0.202031
ACATT	-0.203098
TAATT	-0.203612
CAAGT	-0.204135
TTATG	-0.206883
ATAAA	-0.208458
AAACT	-0.208846
CAAGC	-0.210108
TTGAG	-0.211788
AAATT	-0.219732
ACGAA	-0.221248
TAAAC	-0.222303
ACAAT	-0.22276
TAACT	-0.223065
ACGAG	-0.223923
CAGTC	-0.225573
CAACT	-0.227897
ACAAA	-0.230423
AAATG	-0.231384
CAATG	-0.231598
CTACT	-0.233172
AAAGT	-0.233316
AAGAA	-0.235412
TAAAA	-0.237121
AAACA	-0.23787
TGAAT	-0.238398
CGAAG	-0.23864
ATAGA	-0.239935
ATATA	-0.240087
TTACC	-0.240621
CAAAC	-0.24152
TCGAG	-0.242148
AAGCA	-0.243136
CTACG	-0.243608
TAGTC	-0.243646
TTACG	-0.245825
AAAGA	-0.246458
AAGAG	-0.250489
ATATG	-0.250714
ACATC	-0.254958
TAAGT	-0.25606
AAGTC	-0.256064
TTATT	-0.261895
AGAGA	-0.26194
CAACG	-0.26206
AGATT	-0.265278
TGAAG	-0.269107
CCATT	-0.271724
AAAAG	-0.271756
TAGCA	-0.271833
GTAAG	-0.276845
CAATA	-0.280346
AGAAC	-0.28063
AAATA	-0.280839
TCGAT	-0.281899
AGATG	-0.282027
TTACT	-0.283107
TCATG	-0.283706
CCAGC	-0.284438
CAATT	-0.285054
TGATC	-0.285754
CTATG	-0.286573
ATATC	-0.28715
CAAAT	-0.287246
TCAGC	-0.287419
CTAAC	-0.287951
TGAAC	-0.288036
CGAAC	-0.289237
AGAAT	-0.289626
AGACA	-0.290166
CAACA	-0.291212
CAGAC	-0.291532
ACGAT	-0.291721
CCAGA	-0.294076
ACACC	-0.29499
CTAAA	-0.295757
ATATT	-0.296776
AGATA	-0.297699
CAGAA	-0.298635
AAACG	-0.299762
TTAAC	-0.299871
TACAT	-0.299987
GAACA	-0.300251
GTACT	-0.300584
TTATA	-0.301038
GAATG	-0.306148
CAGAT	-0.306962
CTATT	-0.307019
TCACA	-0.3086
ATAAT	-0.309134
TAACC	-0.309977
TAACG	-0.312481
CAAAA	-0.313524
ATACT	-0.313575
CAATC	-0.31457
ACAGG	-0.314744
TGATT	-0.315015
CAGTT	-0.315264
TCAAT	-0.315568
TAATG	-0.316068
GAAGA	-0.316542
ACGAC	-0.316767
TAGAG	-0.31677
TTAAA	-0.317768
TCACG	-0.319054
CTACC	-0.31959
AAGCC	-0.319604
GAGTC	-0.320136
AAAGC	-0.32221
TAACA	-0.32312
AAGCT	-0.325272
TGACG	-0.32667
TGGAG	-0.328252
TAATA	-0.329927
AGACC	-0.332127
CCAAT	-0.332984
TCACC	-0.336348
TCATC	-0.336979
GAACT	-0.337633
ACACG	-0.339007
AAGCG	-0.339555
ACAGA	-0.339779
TACTG	-0.340951
GAAAC	-0.341588
TAATC	-0.341633
TCAGA	-0.343482
AAAAA	-0.345372
ATAAC	-0.345451
TCGCA	-0.346208
TGACT	-0.346784
TCAGT	-0.346845
GAATT	-0.346957
ATCCA	-0.346998
TGAGG	-0.347422
AGAAA	-0.347475
CCAAC	-0.348127
CGATG	-0.348322
ACGTC	-0.349517
CCAAA	-0.349755
TAGCC	-0.349952
ACACT	-0.351101
CCACG	-0.351578
TCAAC	-0.352383
TGATG	-0.352976
ACACA	-0.353109
GTACA	-0.353601
CAGAG	-0.353689
CAGTA	-0.353818
GAGAT	-0.354303
GCAAC	-0.35463
CAACC	-0.355446
CCATG	-0.35637
AAATC	-0.356819
AAGTT	-0.357186
AAAAT	-0.357534
CCAGG	-0.357803
TGAGA	-0.358106
ATACC	-0.358154
TTAGA	-0.360222
GCACA	-0.360665
TCAGG	-0.361996
TTAAT	-0.362224
TACTA	-0.362531
CGACA	-0.363065
AGATC	-0.364251
ACAGC	-0.365267
GAGAA	-0.365514
AGACG	-0.365652
AACAA	-0.366699
AACTA	-0.367691
ACGTG	-0.368567
CAGCA	-0.370451
GCAGC	-0.371252
TGATA	-0.371612
CTAGA	-0.371627
AACAG	-0.371763
AGACT	-0.372732
TGAAA	-0.374555
CGACC	-0.374561
ATAGT	-0.375112
CACAG	-0.375354
GAAAA	-0.375584
TAAGG	-0.376186
CTAAT	-0.376668
GCATG	-0.376684
CTATA	-0.376752
AGGCA	-0.378198
GCATT	-0.378479
CCGTT	-0.378922
GAATC	-0.379688
CGAAA	-0.380085
ACGTA	-0.380882
CCACT	-0.382228
CTGAT	-0.383059
AAGTG	-0.383412
TCGAA	-0.38379
GAGCC	-0.384591
TAGTT	-0.385943
ACTCA	-0.387312
CGATT	-0.388299
TTGTC	-0.388506
GAAAT	-0.389008
CATCA	-0.389626
GAGTA	-0.390064
TTAGG	-0.39018
TCGAC	-0.390373
AGGTC	-0.390725
CGAGT	-0.390777
GAGAC	-0.391156
TAGCG	-0.391555
GAACC	-0.392376
ATACG	-0.392546
CATCG	-0.392589
TCACT	-0.393648
TATCG	-0.394408
GCAAT	-0.394436
CCGTC	-0.394824
TGACA	-0.396075
AGAGG	-0.396679
TTGAA	-0.396712
TAGGT	-0.397191
TCAAA	-0.398194
GTATT	-0.399007
ATAGG	-0.399589
CGGCA	-0.40043
TTCAG	-0.401008
CGAGA	-0.402533
TACAC	-0.402721
TAGTA	-0.402963
TTTCA	-0.403819
GCAAA	-0.404583
CTAGT	-0.404869
TATTA	-0.404869
TTATC	-0.406271
GTAAA	-0.406488
TCATT	-0.406863
TCGTG	-0.407816
AAAGG	-0.408029
TCGGT	-0.408281
AGCAG	-0.408762
CTGAG	-0.410273
GGAAG	-0.411522
TCGCC	-0.411728
TAGGC	-0.412121
TTGTT	-0.412672
GAGAG	-0.413366
AAGGT	-0.41389
GCAGT	-0.414231
CGATA	-0.415265
CAGTG	-0.415442
TCCAG	-0.416596
CAGGC	-0.416841
TAGTG	-0.417326
TATCA	-0.417428
GGACA	-0.417637
CACTA	-0.417951
GAACG	-0.418934
GAAAG	-0.419275
ACGTT	-0.419577
CGACT	-0.421508
TTGCA	-0.422175
TTGAC	-0.422387
TCATA	-0.422782
GTATA	-0.422799
ACTAC	-0.424525
TAAGC	-0.424594
AAACC	-0.425376
CGACG	-0.425485
GCACC	-0.425692
CACAA	-0.425877
GAAGC	-0.42588
GAAGT	-0.426094
CCGAC	-0.426222
GAGCA	-0.42651
CTATC	-0.427288
TGACC	-0.427575
CGATC	-0.427933
TGCAA	-0.428458
CAGCT	-0.428921
ATCCG	-0.42898
GCGAG	-0.429444
AGCAA	-0.433253
GTACG	-0.435122
AAGTA	-0.435183
TCGTT	-0.435642
TCGTC	-0.435647
GAAGG	-0.436635
TATCC	-0.436799
CAGGA	-0.436818
CACCC	-0.437021
CAGCC	-0.437026
ATCCC	-0.437113
CGAAT	-0.438274
CCACC	-0.439698
CGAGC	-0.439857
CCAGT	-0.439905
TTCCG	-0.440489
CCATC	-0.440973
GTGAA	-0.441521
CGGAA	-0.44256
CCACA	-0.442691
ACCAG	-0.443019
TATAT	-0.443117
TGGAA	-0.44411
TATAC	-0.444784
CAGCG	-0.445785
TATCT	-0.447631
CTGAA	-0.448111
CTAGC	-0.448176
TTAGT	-0.448727
AGCCA	-0.448868
ATCAA	-0.449091
ACCAA	-0.449233
AGGAA	-0.450764
ATCTA	-0.45092
TTAGC	-0.451675
TTGCC	-0.45222
GTATG	-0.452266
GTGTC	-0.45237
CCGAA	-0.452412
AACTG	-0.453163
TAGCT	-0.45387
CCATA	-0.454005
ACCCG	-0.45515
CACCG	-0.455151
TGAGC	-0.45699
CCGAG	-0.457617
AGGAG	-0.460312
TTCAA	-0.461258
GAGTT	-0.46276
TTGGA	-0.463251
TACGA	-0.463618
CTCAG	-0.465359
ACTTA	-0.465362
AGAGT	-0.465563
GCACG	-0.466662
GCGTC	-0.466687
TCGGC	-0.467929
CACAC	-0.468984
CGCAA	-0.469207
CCGTG	-0.46947
CCGCA	-0.469614
TGGTT	-0.470144
TCCAA	-0.470185
TACCA	-0.47258
CACTG	-0.473188
GAATA	-0.473552
CAGGT	-0.473856
GGACG	-0.473888
ATTCA	-0.4739
GGATG	-0.474526
TTGCT	-0.474648
CCGTA	-0.475519
AAGGA	-0.478088
TACTT	-0.478547
TATTT	-0.479915
AAGGC	-0.48025
TCTCG	-0.480671
GTACC	-0.481485
AACCC	-0.486042
TGGCA	-0.488069
CCGAT	-0.488081
ACGGA	-0.488461
ACTAT	-0.488678
GCATA	-0.488979
GCATC	-0.4922
ATTCG	-0.492382
CGGAT	-0.494212
CGGAG	-0.494443
CCCAA	-0.495103
TCGTA	-0.496422
GCAGA	-0.496557
TACCC	-0.496635
TACTC	-0.497069
GCGAC	-0.499309
AACCG	-0.499552
AATCG	-0.501325
GCACT	-0.501959
ATAGC	-0.50203
AGGTG	-0.502626
CGGTC	-0.503403
TTGCG	-0.503974
ACGCA	-0.504109
CTCAA	-0.504793
ACGCC	-0.50485
GGAGA	-0.505554
AGGAC	-0.506342
AATCT	-0.50645
GACAA	-0.506533
CCCAG	-0.506557
AATCA	-0.506881
CCTAC	-0.506926
CTAGG	-0.507275
TATAG	-0.508825
TGGCC	-0.508919
GGAAT	-0.509326
GTGAG	-0.510125
TCCCA	-0.511003
ACGGT	-0.511197
ATCCT	-0.511412
GCGCA	-0.513141
TTCTA	-0.513446
CTGCA	-0.514386
ACTCC	-0.514965
TCCCC	-0.515074
GGAAA	-0.51518
TTCCA	-0.51538
CTTCA	-0.515406
CATCC	-0.515618
ACCCC	-0.516302
GTAGT	-0.516507
TTTCG	-0.517834
AACCA	-0.518198
TAGGA	-0.519267
CCCCG	-0.519768
TTGAT	-0.52066
GTCAA	-0.521809
TCGGA	-0.522053
GGAAC	-0.522614
ATTTA	-0.523254
GTGCA	-0.523499
TACCT	-0.523529
ACGGC	-0.523612
GACTA	-0.524349
CTGAC	-0.52483
GTAAC	-0.525121
CATTG	-0.525245
TATAA	-0.527061
GGAGT	-0.527087
CCGGC	-0.528135
CACCA	-0.528172
AGGAT	-0.529028
GGATC	-0.530174
ACTCG	-0.530811
CGAGG	-0.531747
CGGAC	-0.532301
ATCAG	-0.535323
GCCCA	-0.536475
AGGTT	-0.536641
TCCCG	-0.537627
TATTG	-0.537898
AACAC	-0.538114
GGACC	-0.538167
GTAAT	-0.538548
TGAGT	-0.538594
CCTAT	-0.539383
AGAGC	-0.539557
CATAC	-0.540733
TCGCT	-0.541003
GCAGG	-0.541207
ACCGA	-0.541302
GTGCT	-0.541592
ATCTG	-0.541654
TGGAC	-0.541654
CCGGT	-0.541868
CACTC	-0.542373
TGGTC	-0.543246
GTCCA	-0.543619
TTTTA	-0.544544
TCCTC	-0.545039
TTGGT	-0.545321
TCCCT	-0.54559
TTGTG	-0.54616
AACTC	-0.547183
GTGAT	-0.547465
TCTAT	-0.548025
CCCTG	-0.548047
TGGCG	-0.548856
TCTAC	-0.549897
TCGCG	-0.55083
GCGAA	-0.551371
CTTCG	-0.551545
GTGTG	-0.551843
ACCTG	-0.552198
TACGT	-0.553067
ACCCA	-0.553136
CCCCA	-0.553402
GTGCC	-0.553907
AACCT	-0.555065
ACTAA	-0.555333
GGATT	-0.555632
TGGAT	-0.557113
GAGCG	-0.557378
GGACT	-0.558465
CCTCA	-0.558471
AACTT	-0.559794
TGGCT	-0.560192
CCGCG	-0.560859
TTCCT	-0.561407
GCGCC	-0.561868
CACGA	-0.564817
ACCCT	-0.56523
CCCAC	-0.565476
ACCTC	-0.565537
CATTA	-0.568321
TACCG	-0.568973
AGGCT	-0.56948
AACAT	-0.569795
CCCAT	-0.570974
ACGCG	-0.573905
GTATC	-0.574085
ATTCC	-0.574714
CGGCC	-0.574785
TACGG	-0.575526
GTAGA	-0.575576
ACCAC	-0.576118
ACCTA	-0.577872
CGGTG	-0.578332
TGCAG	-0.578609
GTGTA	-0.579283
TGGTA	-0.579528
AATAA	-0.579885
GCGAT	-0.580064
GATCG	-0.580147
CCGCT	-0.580329
TTCCC	-0.58089
CAGGG	-0.582125
GAGTG	-0.582723
TCTAA	-0.58353
CCGGA	-0.58363
TCCTG	-0.584195
ATCGA	-0.584685
CATCT	-0.58474
ACTTC	-0.585167
CTCCA	-0.585214
CTGGA	-0.586284
AGCCG	-0.58723
ATCAC	-0.588339
AGCTA	-0.589032
CCCTC	-0.589252
AACGA	-0.589568
CACAT	-0.591875
CGGTT	-0.592242
GGAGC	-0.592928
TCTCA	-0.59326
AATTA	-0.594508
CACTT	-0.596021
GCGTA	-0.596221
CTCCG	-0.596783
AATCC	-0.597778
AATAG	-0.59898
GGATA	-0.599552
GCCAG	-0.59967
TTGTA	-0.599899
CCTCG	-0.6027
CGTAC	-0.602951
CCCCC	-0.603699
TCCTT	-0.604196
CTGGT	-0.604498
ATTAG	-0.604664
GACAG	-0.604819
CGGCG	-0.605581
CGCAG	-0.606727
AGTCA	-0.60729
ACTTG	-0.607597
AGGTA	-0.608131
CGGTA	-0.608424
GGGAG	-0.608668
CCGCC	-0.609526
ACCGT	-0.610593
AATAC	-0.610951
GATCA	-0.611374
AGGCG	-0.611497
ACGCT	-0.613906
AGTCC	-0.613991
CGGCT	-0.614579
TTCAC	-0.614649
GTCAG	-0.615437
GCCAA	-0.61683
ATTAC	-0.616961
AAGGG	-0.618301
GTGTT	-0.618616
CACCT	-0.619353
GGGAA	-0.619405
TTCTC	-0.619508
ACCAT	-0.619646
AATAT	-0.619817
AGCCC	-0.620475
CCCGG	-0.621209
GTGAC	-0.621973
AACGG	-0.624451
GTCCC	-0.625682
CCCGA	-0.626023
CCGGG	-0.627334
GTGCG	-0.628388
CTCCC	-0.628511
TTCGA	-0.628998
TATTC	-0.629783
CATAT	-0.630062
CATTT	-0.63082
TGCCA	-0.630865
GACTG	-0.633807
ACGGG	-0.635168
CTGTA	-0.635179
CGTCC	-0.635273
GCCCC	-0.635457
ATTTG	-0.636678
CGCCA	-0.636887
CCCTT	-0.637294
GATCC	-0.638506
TCCAC	-0.639185
ATCTC	-0.639707
ATTAA	-0.640907
CATAA	-0.642558
CTTTA	-0.643756
GCGTG	-0.645579
ATTTC	-0.645591
GCGGT	-0.64576
GAGGC	-0.646419
TGGTG	-0.64923
GACCT	-0.649245
CCCTA	-0.649278
CATAG	-0.650103
GGAGG	-0.650698
GAGCT	-0.652321
TTGGC	-0.654968
GCGCT	-0.656623
AATTG	-0.65667
GCGCG	-0.656726
TCTCC	-0.658121
CCTAA	-0.658546
TCCTA	-0.659255
CCTTC	-0.659517
GCCAC	-0.660145
AGGCC	-0.660177
AGTAC	-0.660608
TTCTG	-0.660783
TTTAA	-0.660892
GTCCG	-0.661438
GGTCA	-0.662052
CTGTC	-0.662826
TTTCC	-0.663945
AATTC	-0.665785
GCCTA	-0.666032
CTGTT	-0.666056
TCTTA	-0.666385
TTTTG	-0.667777
TCGGG	-0.667992
GGGAC	-0.668271
GATTG	-0.670173
CCTTG	-0.67073
CTTCC	-0.670954
GACCA	-0.67192
GAGGA	-0.672065
CACGG	-0.672296
GCCTC	-0.672409
ATCAT	-0.673344
GATAC	-0.673647
GATTC	-0.674531
CGTCA	-0.675303
ACCTT	-0.67636
AGCAC	-0.676421
GCGGA	-0.676653
CCTCC	-0.677174
GCTAC	-0.678215
GTAGC	-0.679147
GCCCG	-0.679282
CCTTA	-0.679799
AGCTG	-0.680888
CTGCC	-0.681008
TGTTA	-0.681923
TGCCT	-0.682322
TTCAT	-0.682792
ACTCT	-0.68329
CGCAT	-0.683385
GTCTA	-0.683875
GACCC	-0.683953
AGCAT	-0.684119
AATTT	-0.684772
GACAC	-0.687642
GTTCA	-0.68896
ATTCT	-0.690123
AGTTG	-0.690778
GTGGT	-0.691194
TGCCC	-0.691573
AGTTC	-0.692037
CGCCC	-0.692421
TCCAT	-0.692485
CCCGT	-0.693027
GTCCT	-0.693542
TCCGA	-0.694768
TTTAT	-0.696676
CTTAC	-0.697036
GACTC	-0.697448
CATTC	-0.697899
CCTAG	-0.702675
CTGTG	-0.702947
GATAA	-0.703294
GGCAA	-0.703611
ATCGG	-0.704726
GTAGG	-0.70612
TGGGA	-0.70705
TTCTT	-0.707601
CCCCT	-0.708028
CTCAC	-0.709363
TGCTG	-0.709368
CTCTA	-0.7107
ACCGG	-0.712256
ATCTT	-0.713924
TGTAC	-0.71434
AGTCG	-0.715311
AGTTA	-0.717997
GGCCA	-0.719021
GACAT	-0.719135
TGTCA	-0.720668
TTTAG	-0.720842
GCTTA	-0.72175
GACGA	-0.721861
GCGGC	-0.72248
TTTAC	-0.723057
AACGT	-0.723239
TCCGT	-0.723559
TCTTC	-0.723566
GTTCG	-0.723779
ATTTT	-0.724902
GATTA	-0.72524
TTTTC	-0.725374
ACTGG	-0.72592
GTGGA	-0.726955
ACTAG	-0.727641
TGTAT	-0.727751
AGCCT	-0.728506
CTCGA	-0.729055
GAGGT	-0.729181
AGTAG	-0.730849
GACCG	-0.731983
TCTAG	-0.732519
GCGTT	-0.732706
TGCAT	-0.732714
CTTTG	-0.732778
CCTCT	-0.733641
CACGT	-0.736151
ATTAT	-0.73618
CGTCG	-0.737407
CTGGC	-0.737517
TGCCG	-0.737871
GGCAG	-0.738509
GATAT	-0.7387
TTTTT	-0.739014
GGGAT	-0.739249
CTCAT	-0.73964
GCCTT	-0.740504
GACTT	-0.741366
TCCGG	-0.741662
CGGGT	-0.742595
CTTAG	-0.746082
CGTAA	-0.748845
TGCAC	-0.750354
TTCGG	-0.750581
GGGTC	-0.751525
CGCCG	-0.753363
GACGG	-0.754346
TAGGG	-0.754478
CTTCT	-0.755113
TGTCC	-0.755324
GTTAC	-0.755665
TCCGC	-0.756602
GTCTG	-0.756653
TCTCT	-0.759708
GGGCA	-0.760092
CGTCT	-0.761381
TGTTG	-0.761469
CGCTA	-0.761795
CGTTC	-0.762618
ACTGT	-0.764203
AGTAA	-0.765628
GCCCT	-0.765852
TGCTA	-0.766648
CCCGC	-0.767328
CGCAC	-0.767751
TGCGA	-0.771711
CTCCT	-0.774195
GCCTG	-0.775349
CTGCG	-0.776947
CGCTG	-0.777442
GCCAT	-0.778147
GTTTA	-0.778914
AGCGA	-0.779558
GATTT	-0.781423
GCGGG	-0.781652
TGGGT	-0.78273
GATCT	-0.782851
ACCGC	-0.787565
CGTTA	-0.788208
GCCGA	-0.788833
CCTTT	-0.790607
GTGGG	-0.792269
ACTTT	-0.794797
CTCTG	-0.800142
TTGGG	-0.805831
CTCGT	-0.808337
CTTAT	-0.80894
GGCCC	-0.810943
GATAG	-0.812042
CGGGA	-0.814139
CTTAA	-0.815975
GGTCC	-0.817716
TCTTT	-0.820834
ATCGT	-0.821353
CTCTC	-0.821597
GGCCT	-0.822346
GTTAA	-0.824921
GTCGA	-0.826716
GTTTG	-0.827434
CGTAT	-0.82747
CGCCT	-0.831621
GGGCC	-0.832283
ACTGA	-0.834255
TTCGT	-0.834881
GTTCC	-0.835765
AGTAT	-0.836556
TGTCT	-0.836671
AACGC	-0.838594
CGCGA	-0.839186
CGTTG	-0.840113
GCCGG	-0.841944
GGTCG	-0.843698
GGTAC	-0.84381
CTGCT	-0.844687
CTTTT	-0.846241
ATCGC	-0.847107
AGGGA	-0.849106
GTCAC	-0.853241
GGGTG	-0.853536
GGGCT	-0.853582
AGTCT	-0.856056
TTTCT	-0.858622
GGTTA	-0.860238
GGGTA	-0.861065
GGCAC	-0.8638
TGTCG	-0.867268
TGCGG	-0.867411
GAGGG	-0.869913
AGCGG	-0.871711
TGTGT	-0.871832
TTTGA	-0.873436
TGCTT	-0.87534
CTGGG	-0.876887
CTTTC	-0.87818
GTTGG	-0.878979
GACGT	-0.879181
TGCGT	-0.879675
GCCGT	-0.884156
GTGGC	-0.884182
AGCGT	-0.886674
CACGC	-0.889401
CGGGG	-0.893046
CGCGG	-0.894187
GTTCT	-0.894521
AGCTT	-0.895393
GCTTC	-0.89548
GCTTG	-0.896705
GTTAG	-0.897199
TGTTC	-0.89741
ATTGG	-0.898825
CCTGT	-0.899044
GGTAA	-0.902403
TGTTT	-0.90353
ATTGA	-0.9046
GTCTC	-0.905203
TCTTG	-0.90647
CTCGG	-0.907782
AGTTT	-0.910609
CGTAG	-0.912272
CTCTT	-0.918217
TTCGC	-0.920069
TTTGG	-0.920986
AGGGT	-0.92432
TGTGC	-0.925906
GGCTA	-0.932362
CCTGG	-0.933287
GGCCG	-0.93633
GGCAT	-0.93645
GCTAG	-0.937495
GCTAT	-0.93796
AGGGG	-0.938041
AGTGA	-0.939673
GGCTG	-0.939928
GCCGC	-0.941062
GCTCA	-0.941301
ACTGC	-0.942211
GGGCG	-0.942954
CGTTT	-0.947308
CGTGA	-0.949274
GGCGA	-0.950872
CGGGC	-0.954018
CTTGC	-0.960746
GTCGG	-0.961967
TACGC	-0.963865
GTCAT	-0.967896
GCTAA	-0.968041
CCTGA	-0.968894
GGTTG	-0.969952
ATTGT	-0.975741
CGCGT	-0.979265
TGGGC	-0.979757
AGTGC	-0.980974
GGTAG	-0.981123
TCTGG	-0.981756
CTTGT	-0.982879
TGGGG	-0.985142
AGTGT	-0.985224
GGGGA	-0.986437
GTTAT	-0.988099
TTTGC	-0.991958
TCTGA	-0.993623
GACGC	-0.99835
CGTGT	-1.00091
GGTTC	-1.01031
ATGCA	-1.01087
CTTGG	-1.0127
CGCGC	-1.01413
TTTGT	-1.01415
GGGTT	-1.01631
CTCGC	-1.01683
CTTGA	-1.0181
AGTGG	-1.01865
TGTAG	-1.02654
GTCGC	-1.02718
GGCTT	-1.02808
GGTTT	-1.03244
ATGAA	-1.03253
ATTGC	-1.03493
GTTTC	-1.04474
GTCTT	-1.04594
GCTCC	-1.04638
AGCGC	-1.05115
CGTGG	-1.05251
TGTGG	-1.05289
GTTGA	-1.0559
AGCTC	-1.05675
GGTAT	-1.06211
CGCTC	-1.06389
GCTGT	-1.06929
CGTGC	-1.07077
GCTCG	-1.07082
GTCGT	-1.07244
TGCGC	-1.07376
GGTCT	-1.07833
GTTTT	-1.07856
CCTGC	-1.08241
CGCTT	-1.08576
GCTGG	-1.09602
GCTGA	-1.09894
GGGGT	-1.10153
GGGGG	-1.10207
GGCGT	-1.10679
GTTGT	-1.11055
GGCGG	-1.12059
TGTAA	-1.12868
GTTGC	-1.13498
GCTGC	-1.14001
GGCGC	-1.14618
GGTGG	-1.15663
ATGAG	-1.16218
GGTGC	-1.16499
GCTCT	-1.16781
AGGGC	-1.17022
TGCTC	-1.17057
GGTGT	-1.18039
TCTGT	-1.18572
ATGCC	-1.19823
GGTGA	-1.2051
GGGGC	-1.21261
ATGGA	-1.21928
GCTTT	-1.22482
ATGCT	-1.22738
ATGTC	-1.23757
GGCTC	-1.23904
ATGAC	-1.25209
TGTGA	-1.26145
ATGGC	-1.27042
ATGAT	-1.2824
ATGGG	-1.29271
ATGTT	-1.29693
ATGCG	-1.30116
TATGG	-1.31226
TATGT	-1.31396
TCTGC	-1.31767
ATGTA	-1.337
TATGC	-1.34139
CATGG	-1.3425
CATGT	-1.34479
ATGTG	-1.39234
TATGA	-1.39926
AATGG	-1.40039
AATGC	-1.40159
GATGT	-1.40701
ATGGT	-1.41334
GATGG	-1.42481
CATGC	-1.43683
CATGA	-1.44913
GATGC	-1.45864
AATGT	-1.48128
GATGA	-1.52026
AATGA	-1.52743
