# Supplementary material for: Deep learning of the regulatory grammar of yeast 5′ untranslated regions from 500,000 random sequences
Source: HighWire-hosted journal article supplement (doi:10.1101/gr.224964.117), 2017-11-02
Supplement: Supplemental_Table_S3.xlsx [file Supplemental_Table_S3.xlsx]

## Sheet: Native_HIS3_Growth_Rates
Supplemental Table 2. Native 5' UTR sequences.
Native UTR	UTR sequence	Growth rate (Log2)	Input reads	Selection reads
YAL001C:38:0	AGAGGACGTTTGGTTGAAGCCAACTAGCCACAAGAAAA	0.298692	317	364
YAL002W:125:75	AAAAAAGGGAACCTCTGGTTACGATGATATACCTGCGTGAAAAAGGACAG	-0.51604	60	30
YAL002W:156:106	TAATCAAAACGTGAGTTTCCTGTGGAAAAAAAAAAAAGGGAACCTCTGGT	-0.349979	34	20
YAL002W:50:0	AATAAGTGTAAAATATATATCTGCCGAGACCATTACTCATTACACCTAGA	0.539062	123	180
YAL002W:75:25	TTATTACCAATACATACAAAGGCTTAATAAGTGTAAAATATATATCTGCC	0.863296	106	215
YAL003W:21:0	AACCGAATATATACACACATA	0.418239	4792	6199
YAL005C:50:0	AAGTAATCAAGTATTACAAGAAACAAAAATTCAAGTAAATAACAGATAAT	0.160847	0	0
YAL005C:62:12	ACATCAAAAGAAAAGTAATCAAGTATTACAAGAAACAAAAATTCAAGTAA	0.160847	0	0
YAL007C:50:0	CAAACTAGAATAAGATAAACAGTGGAGTACACTCATTGTAAAGGAAAACC	0.160847	0	0
YAL007C:75:25	ACCGCCAATTCTGCATCAGGTGACCCAAACTAGAATAAGATAAACAGTGG	1.00814	2	6
YAL008W:48:0	ATAACGCTAGAGGGGCAAGAAGGAAGAACTTAAAATAATAGGTGTAAA	0.517521	20	29
YAL009W:41:0	ACAAAGGAAGAAAGGTAGTGGAAAGCTAAATAAAGGAGGTC	0.149917	183	181
YAL010C:41:0	ATACGTTAGGAAAAAGACACGAACAGAGAAGACCGATCTTG	-0.55264	148	72
YAL011W:4:0_YGR212W:4:0	AAGA	0.0356272	18997	16761
YAL012W:50:0	TAGACATTTGCACCTTATACATATACACACAAGACAAAACCAAAAAAAAT	-0.532301	15	7
YAL012W:55:5	ACACATAGACATTTGCACCTTATACATATACACACAAGACAAAACCAAAA	0.431721	44	58
YAL013W:34:0	ACAGAAGCAAGAGGAGGCGCATCGATCGTGGCAG	-0.073386	2130	1685
YAL014C:48:0	ATAGAGACAGATCTCACGACAGCAAATAGATGCGTAAGCACACACGGT	-0.911098	110	37
YAL016W:50:0	CTGGTATCTGATTATCGAAGAATAATTGAGTGGTCAGAAAGGAGCGAAAT	-0.606409	27	12
YAL016W:56:6	TAACAACTGGTATCTGATTATCGAAGAATAATTGAGTGGTCAGAAAGGAG	0.0273151	31	27
YAL016W:81:31	AACGTGGAACTTATTTCGACGACTATAACAACTGGTATCTGATTATCGAA	-0.123666	104	78
YAL017W:125:75	TTCCGTTCGTCATCTCCCTCTTTTGTTTTTTTTCACCTTTGTTTTTCTGT	-0.756288	1778	710
YAL017W:175:125	TTTTGGTAAGTCAGAAATTAGAAACAGTAGCTTACCAATTGAGTGAAAGT	0.853994	2	5
YAL017W:225:175	AAACCCCGGATATCGTCACAACAGCGGTATATTATAGTTATTTTGCATCT	-0.684163	290	124
YAL017W:275:225	TTCAGGCGTCGTTGCACCTTTTTGCTATACAAAAGCTCATAAAAGATTAG	0.43823	121	160
YAL017W:325:275	AAGTGCAGTTTTTTGTATTATTTTCCTATTATCCTCTTCTTTTCCTTTGT	-0.611569	1075	496
YAL017W:367:317	AACCACAACATAGCATTCGTTGAAAAGGAAATCAACGTTACAAAGTGCAG	0.160847	0	0
YAL017W:50:0	TTTGTTTTGTTCTCTCCCTAATTTGCATATAGGTAAACATCAAAGAAGTA	-0.210717	28	19
YAL017W:75:25	TTCTTCTATTTTTGTTTTGTTTTGTTTTGTTTTGTTCTCTCCCTAATTTG	-0.976946	988	316
YAL019W:110:60	GTGTGCTATAGTGCTCTATATTCGAGTTTGTTGCTACTGGTGGACACCCG	-0.206878	610	422
YAL019W:50:0	GTAAGGAACGTAAACAAGAAAAAGAGAGAAAATACGCTATAGTTGAAAAC	-0.195828	9	6
YAL019W:75:25	ACTGGTGGACACCCGACTATCTACAGTAAGGAACGTAAACAAGAAAAAGA	0.160847	0	0
YAL020C:15:0	AACAGGCTTGTATCG	-0.224169	7816	5318
YAL021C:44:0	AGCAAGGGAACTCCGACTGACGTTATCCCTGCAAACTACCGCTA	-0.125569	525	394
YAL022C:16:0	ATACCAGATTGCAAAA	0.275288	5129	5751
YAL023C:50:0	TTAGTCCACATCGCTACTGTCATTCTGTTTCGAACCGTGGTCCAGCAATC	0.038414	511	452
YAL023C:63:13	AAGGAGAACCGGCTTAGTCCACATCGCTACTGTCATTCTGTTTCGAACCG	-0.56509	898	434
YAL023C:88:38	ATTTCTCGAGACTAACAACATTACCAAGGAGAACCGGCTTAGTCCACATC	0.17672	249	253
YAL024C:104:54	AGCCCACCCCAACCGTACTCGTGTTATTCGCTCGTTGATTTACGCGAACC	-0.104233	626	480
YAL024C:50:0	TGTTTGCTTTACATAGCCTCTAGCCATTCAAAGATTCGCTACCCTGAACC	-0.448064	420	228
YAL024C:75:25	GCTCGTTGATTTACGCGAACCTTTTTGTTTGCTTTACATAGCCTCTAGCC	-0.256135	785	517
YAL025C:23:0	AACGGTTAGAATACAACGAGGAT	-0.196973	1997	1396
YAL026C:50:0	AGCGCCAAGCAATAATTTACTGGTAGGTTCTTTCATTCCCTGATTTTACC	0.323365	339	399
YAL026C:61:11	AAATAGAGGTTAGCGCCAAGCAATAATTTACTGGTAGGTTCTTTCATTCC	-0.254875	146	96
YAL026C:86:36	AGTGCAACAAGAAGCCAGTAACGCCAAATAGAGGTTAGCGCCAAGCAATA	-0.099111	165	127
YAL027W:50:0	GAAGAATACAAGAAGATTGAGTATATTGGACTTCACAGTAACCGTGAAAA	0.720462	11	20
YAL027W:55:5	AAAGGGAAGAATACAAGAAGATTGAGTATATTGGACTTCACAGTAACCGT	-1.20864	58	14
YAL027W:80:30	AATGAAATAGAAAAGGACAGGCCTGAAAGGGAAGAATACAAGAAGATTGA	0.160847	0	0
YAL028W:46:0	AAATTGATGGCAGTTTTTTACGTAGTCCAGTAGTTGTCCAGGTACA	-0.347066	456	274
YAL029C:125:75	ACATTGTTACCAGTTTGGCGAGACAATTTATTTTCAATACGATACCCTTT	-0.42694	395	219
YAL029C:175:125	TATCACCTTTTTTTTTACCTTCTCTTCTTTTCTTATTGTTCTAGCTGAAA	-0.340633	354	214
YAL029C:225:175	TCAGCCTTTATTCTGATTCTGCATACTCAATTCCTCAATTCCTACGGAGT	0.0239873	429	374
YAL029C:252:202	AATTGTAATACAACCTTTTTTTGAAAGTCAGCCTTTATTCTGATTCTGCA	-0.589459	179	84
YAL029C:50:0	AATTCTAAAACACAAAAAAACAAAAAAAATCCTATAACCAGTTCTCCCGC	0.0823749	52	48
YAL029C:75:25	TGTTCTTCTTTTTATAATTCAATCTAATTCTAAAACACAAAAAAACAAAA	0.160847	0	0
YAL030W:22:0	AAGCGCAACGTATTCATTGTCC	0.326659	4712	5562
YAL031C:47:0	GATTGGAAGCTGAAGGTTGAGGATTTAGACTAGTTTTATATTACAAC	0.437479	90	119
YAL032C:20:0	ATCAGCAACCTCAACCAAAT	-0.00108873	3223	2741
YAL033W:5:0	GATAA	-0.205382	7496	5197
YAL034W-A:29:0	GAAACTGGGTTAAGACGATCAAAACAACC	0.0206625	710	617
YAL035W:26:0	AATCAGGAACATCAGATAAGTGAAAG	0.294773	948	1084
YAL036C:37:0	GCAGTAGGTGCAAGCGTAGAGTTGTTGATTGAGCAAA	0.103959	1084	1024
YAL038W:27:0	AATCAAAACAAATAAAACATCATCACA	0.123668	1095	1055
YAL039C:50:0	ATACGAGTAGCACGAATAAAGCAGAGCAAATACAACAGAAACTACAAAAA	0.960966	30	68
YAL039C:56:6	ATACACATACGAGTAGCACGAATAAAGCAGAGCAAATACAACAGAAACTA	-0.00822982	44	37
YAL040C:125:75	CATTGCATTTCCTCATTCGGTTTAACTCCTCTGCATTTCTTTTCTGACCC	-0.676195	872	377
YAL040C:175:125	GCATCCATCCGAGTCCCAGTCGCAATCTCACATCTCCAATTTAACGTATC	-0.357778	1415	842
YAL040C:225:175	TCTCTTTTCTTTTCTCCCTCTTTTTTCTCTGTACTAGCATCCAAAAGCAA	-0.413782	301	169
YAL040C:275:225	GAATTGCCCGAGTAGTCTCCTCTGCCGACTTAAACCAACCTTTTTCTATT	-0.327038	631	387
YAL040C:324:274	GCCAGTCAAATGGATTTCTGAGGAAAGAGGACTATACCCATTAGGAAACG	-0.175626	34	24
YAL040C:50:0	TCTCCCTTTTACTCTCGTTCAAGACACTGATTTGATACGCTTTCTGTACG	0.173478	943	955
YAL040C:75:25	ATAGCATTTCTTACATTCCATTGCATCTCCCTTTTACTCTCGTTCAAGAC	0.386471	643	806
YAL041W:50:0	TTGTTGCCTAGCCCTATCAAGACCTGTCTGCTAATCCAACCCGAGAGATC	0.0733591	190	174
YAL041W:64:14	ATTGCTGTTATCATTTGTTGCCTAGCCCTATCAAGACCTGTCTGCTAATC	-0.440801	740	405
YAL042W:42:0	AGGACAGTGATATAACACACATAGCTAGACACAATAGACATC	0.476967	77	106
YAL043C:24:0	ATATAACTACCACTAAGCAGCGCA	0.329474	3369	3988
YAL044C:14:0	ATACCACATCGACA	0.137397	9060	8850
YAL048C:36:0	AGCGGACTTCTAAATACTAATGTGTTGAACAACACA	-0.410669	316	178
YAL049C:50:0	AAAGTTTTCCACTACGTCTAACTACAGCAGAACAAAATTATTTCAATCAA	1.54714	2	11
YAL049C:66:16	AAGACTCAGTAGACTTAAAGTTTTCCACTACGTCTAACTACAGCAGAACA	0.640616	241	390
YAL053W:125:75	TGGAAAACATTTATACCCCTTAAACTAAAACAATTTGCTGCGCTATACCG	-0.964434	227	73
YAL053W:155:105	GAATGGCATATATATATAGAACACCACCCTTGGAAAACATTTATACCCCT	0.247858	32	35
YAL053W:50:0	ATTTCTGTTTCATTACGATTATATTGACGTGATAAAAAGATTATATAGCC	0.386115	375	470
YAL053W:75:25	TGTTTCAGTGTATTATAATACATTCATTTCTGTTTCATTACGATTATATT	-0.305527	439	275
YAL056W:44:0	GTGATTCATTGGCAGGTCCATTGTCGCATTACTAAATCATAGGC	-0.229516	689	466
YAL058W:15:0	ACACAAAGTAGTACT	0.280042	4557	5134
YAL060W:48:0	AAGTCAGAAAAAAAAAAAAAAAGGAACTAAAAAAAGTTTTAATTAATT	0.160847	0	0
YAL061W:50:0	AATAACAACAGCAATAAGAATAACAATAAATTCATTGAACATATTTCAGA	-0.126836	7	5
YAL061W:64:14	AGACAGTTAACAATAATAACAACAGCAATAAGAATAACAATAAATTCATT	0.160847	0	0
YAL061W:89:39	ATCGTCAAGATATTTGAAAGTTAATAGACAGTTAACAATAATAACAACAG	0.160847	0	0
YAL062W:125:75	TGAGCCGTTCGAACTCAGTTATATAAAGGTACATACATAGGCCACACACA	-0.452258	95	51
YAL062W:175:125	GTATTTCTTTTTATTTCACTTTCACATAAACAGTTAATGACTTCTGACTT	-0.832405	161	59
YAL062W:225:175	CGTTGGTTAATATGGAAAAAGTGATGACCATGATGCCTTTCTTAAAAAGA	-0.164576	17	12
YAL062W:275:225	ATTACTTATCTTATCGATAAGCAGTATTGATATTAAAGGGACAGTTTTAT	0.499822	56	79
YAL062W:325:275	GAAGAAAGGAAAAAATGCGGAGAGGGAGCCAATGAGATTTTAAAGGGTAT	0.160847	0	0
YAL062W:354:304	TTCAGTTTGCTTGATTGGCCCAGCTCTTTGAAGAAAGGAAAAAATGCGGA	-0.257864	75	49
YAL062W:379:329	ATACCAACTTTTCTTTTTCTTCCCGTTCAGTTTGCTTGATTGGCCCAGCT	0.0490455	1124	1005
YAL062W:50:0	ATATAGGGAAGTAGCAACAGTCACCGAAAAGAAAAGGTAAAAAGTAAAAA	0.160847	0	0
YAL062W:75:25	CACACACACACACATATATATATATATATAGGGAAGTAGCAACAGTCACC	0.160847	25	25
YAL063C:125:75	TATATTACATAAAATTCGATGACACTAAAAGTCCATTAATAACATAACGT	-0.458193	38	20
YAL063C:175:125	ATTTCCTCCTTTGCTAACACATTATCCTGCCAAATTATTCTACCTTCTTA	0.146762	428	422
YAL063C:218:168	AATTTAAGCAGCTAAAAAATTTTTTCTCTTTTAAAGGTATTCGATTTCCT	0.0324653	82	72
YAL063C:243:193	AATCTATCGGGTGGTATAACACAGAAATTTAAGCAGCTAAAAAATTTTTT	-0.195828	9	6
YAL063C:50:0	TCTTTAAATTGCAATTTAAAAAGAACAATTGTACAATAAAAGCCCCAAAA	0.67879	27	46
YAL063C:75:25	TCTTCCTTCTTATTTACAGGTACGCTCTTTAAATTGCAATTTAAAAAGAA	-0.42694	35	19
YAL067C:125:75	CAACCAGACTATATAAAAGAGCATCTAGTTTACCTGTTATGATGAATGGA	0.512886	172	245
YAL067C:175:125	AAGAAACCAAGCGGAGACATGCGTTTAGATGAGGATATAAATTATTTATA	-0.785003	102	39
YAL067C:50:0	TTTGTTAAAAAAAATTACAAAGAGAACTACTGCATATATAAATAACATAC	0.160847	0	0
YAL067C:75:25	CATTCGCTACATATCTTACTCTCTATTTGTTAAAAAAAATTACAAAGAGA	0.540336	64	94
YAR002C-A:16:0	AATCTCTCTACTAATC	0.310906	9307	10814
YAR002W:42:0	ACATCAAATAAGCACCGCAAGATATCCTAAAATCGACATCCA	0.112933	341	325
YAR003W:50:0	GTCGAGACCGAGTCCTTTTAGTTTGTGTATATCAGCTGGTTCTTTTCGTT	0.0720109	1246	1140
YAR003W:54:4	AAGAGTCGAGACCGAGTCCTTTTAGTTTGTGTATATCAGCTGGTTCTTTT	-0.370196	482	283
YAR007C:50:0	ATTACGGTAAAGGCGAAACCAGCAAGAAGACCAGATTATACTTACAAGAG	0.160847	0	0
YAR007C:63:13	ATTCACTCTTCTTATTACGGTAAAGGCGAAACCAGCAAGAAGACCAGATT	0.0247143	274	239
YAR008W:50:0	TAGCTATTAACATATATGCAAAAAGAACGGCAAAAGGCGAGGAGGTTTTT	0.160847	3	3
YAR008W:73:23	GGCTGAAGAAGGTGGTACGCGCATAGCTATTAACATATATGCAAAAAGAA	0.53191	68	99
YAR008W:98:48	AATTAGCATAGATCCTTTCGTATATGGCTGAAGAAGGTGGTACGCGCATA	-0.511787	385	196
YAR014C:125:75	TATCGTGTAGAACTGGATCCATTCTTTCCTGGCTGTGGTAGTACTTAAGG	-0.1386	227	168
YAR014C:50:0	GAGGTGAAATACACGTAGTTTTTAGATAACATTCTCTGCTTGGTAAGAGA	-0.661978	147	64
YAR014C:75:25	AGTTGGACGTGTTCAAGTCGAGAAAGAGGTGAAATACACGTAGTTTTTAG	0.173532	234	237
YAR015W:103:53	GAGGTAAGACGGTTGGGTTTTATCTTTTGCAGTTGGTACTATTAAGAACA	0.2909	35	40
YAR015W:50:0	GAATCATAAGCATTGCTTACAAAGAATACACATACGAAATATTAACGATA	0.160847	0	0
YAR015W:75:25	GCAGTTGGTACTATTAAGAACAATCGAATCATAAGCATTGCTTACAAAGA	0.160847	0	0
YAR018C:16:0	AATTCTCTGTGTGAGT	-0.012046	11399	9589
YAR027W:50:0_YGL053W:50:0	ACCTCCAAAACCATATAATAACCTTACACAAGACAAGATATCAATTCAAC	0.160847	0	0
YAR027W:57:7	CATAACAACCTCCAAAACCATATAATAACCTTACACAAGACAAGATATCA	0.853994	14	29
YAR027W:82:32	ATGATCAAGTCGTAATTCGAATCAGCATAACAACCTCCAAAACCATATAA	0.160847	0	0
YAR028W:50:0	ATCAGGATAACATCTATAAGTGCCATATTAAGGCAAGATATCAATTGACC	0.229249	112	120
YAR028W:56:6	ATTTTGATCAGGATAACATCTATAAGTGCCATATTAAGGCAAGATATCAA	0.160847	0	0
YAR033W:42:0	AGGAATACTATAGTCATAGGCAATACAAGGTATATATTGGCT	0.160847	0	0
YAR042W:24:0	ACACCTTTCACCCCTCCACACACC	-0.40206	8978	5113
YAR066W:50:0_YHR214W:50:0	ATTTCTTTCTTTTTATTGGTAAACTCTCGCCCATTACAAAAAAAAAAGAG	0.464033	191	259
YAR066W:51:1_YHR214W:51:1	TATTTCTTTCTTTTTATTGGTAAACTCTCGCCCATTACAAAAAAAAAAGA	0.985022	24	56
YBL001C:50:0	TTGCCGTCGTGATCATTAACTATAAAGCACATAAACTACAAGTTTAGAAA	1.77028	1	9
YBL001C:61:11	AGTTTTTGTCATTGCCGTCGTGATCATTAACTATAAAGCACATAAACTAC	0.675302	164	275
YBL002W:23:0	AACAACAACTTACTCTACAACTA	0.490209	2096	2914
YBL003C:35:0	AGGAAAGTACAGAACAAGAGCAAATTTAATATATA	0.684744	227	384
YBL004W:107:57	GTAGGTTGTAAATTAAAGATCATATTCTTTCCTGTTTACATCCAGTTTTA	-0.146179	173	127
YBL004W:50:0	GGCCGTATTGGTATATTTCTAGTATCAGTTACACATATTTCATTGAAAGT	0.76419	162	297
YBL004W:75:25	TGTTTACATCCAGTTTTACGTTGTTGGCCGTATTGGTATATTTCTAGTAT	-0.551063	537	263
YBL005W:50:0	CGACAACTGCATCAGCAGTTTTATTAATTTTTTCTTATTGCGTGACCGCA	-0.379438	332	193
YBL005W:62:12	ATAGGTCTTAGGCGACAACTGCATCAGCAGTTTTATTAATTTTTTCTTAT	-0.279775	274	176
YBL006C:4:0	GAGA	-0.180573	12563	8929
YBL009W:42:0	ATTTCACCAAACACACATACATGCGCTATTTGTATTGAGAAA	-0.0184944	66	55
YBL011W:50:0	AAATATATAGTAAAAAGAGCACAGGGGCGTTTACATCGGGGTAAAAAAAA	0.160847	0	0
YBL011W:75:25	AATTAAGTGTAGGAAGCCCGGAATTAAATATATAGTAAAAAGAGCACAGG	0.985022	24	56
YBL013W:50:0	GGGACCTAGGCACCTCATAGTGAGAAGATTGAAAACGGCGTATCAAACAA	-0.316412	165	102
YBL013W:66:16	AAGAAAAAAAAGGAAGGGGACCTAGGCACCTCATAGTGAGAAGATTGAAA	0.272072	16	18
YBL014C:29:0	AAAGAGAGAAGGCGTTCTATGGGCTGAGC	-0.830919	4504	1670
YBL015W:50:0	GCAAAACAAACAACACATTTCTTTTTTTCTTTTTCACATATTGCACTAAA	-0.605326	70	32
YBL015W:52:2	CGGCAAAACAAACAACACATTTCTTTTTTTCTTTTTCACATATTGCACTA	-0.19013	124	87
YBL015W:77:27	AAGAGACCGTCTTACTAGACAATAGCGGCAAAACAAACAACACATTTCTT	0.0808038	25	23
YBL016W:23:0	AGAGAAAAAGAAAGGAAAATAAT	0.490403	227	316
YBL017C:125:75	AATTCCTTTCCGGTTTTTTTCTCAACTACCGTACTCTTTTTCCTTTTTTA	-0.197818	646	451
YBL017C:156:106	TACTATTTCATTCTACTAAGATCTTTAAAGCAATTCCTTTCCGGTTTTTT	0.246502	245	267
YBL017C:181:131	ACAAAAAAAGGAGGCGAGTAGGTGGTACTATTTCATTCTACTAAGATCTT	-0.126836	63	47
YBL017C:50:0	GCTCTGTATATCTGGAAAAGCCCTGAAGTGTCCAGTAGTCATCACACGTT	-0.00304134	429	364
YBL017C:75:25	TTTTGCCCTTAGATTGTATTATAAAGCTCTGTATATCTGGAAAAGCCCTG	-0.440733	145	79
YBL018C:41:0	AAGAAAAGGCAGATAAATAGTTTGATAAATGGCCAGTTGTG	0.100829	102	96
YBL019W:50:0	GAGAGAAGCTATTTCACCGTAAAGAAAATCCCTTTCCTTGTCAGGACACT	-0.0118662	144	121
YBL019W:52:2	AAGAGAGAAGCTATTTCACCGTAAAGAAAATCCCTTTCCTTGTCAGGACA	-0.0803155	209	164
YBL020W:50:0	TAGGGTGATTTGAAGTTGATTCTGCTTTTGTCAGTGAAGGAAAAGAAAAA	-0.532301	23	11
YBL020W:57:7	CCACAGATAGGGTGATTTGAAGTTGATTCTGCTTTTGTCAGTGAAGGAAA	0.0165969	133	115
YBL020W:82:32	AATGCGTATTAGTAGCAGTAAAGGGCCACAGATAGGGTGATTTGAAGTTG	-0.768689	37	14
YBL021C:47:0	AGGACTAAGCTAGATAGTAACACAAGTGGCACAAACCTCTCGAGAAT	0.713636	41	72
YBL022C:119:69	ACGGTTACTAGGACACCTAAAACCTGATAATACAGTGTGCATTTGCAGCT	-0.62067	200	91
YBL022C:50:0	TTTTCTTTTGGTTTTCGAGGTGCTTGAACGAAAAGATTTGCAAATAGAGC	-0.151788	256	187
YBL022C:75:25	GCAGCTGTTTCAAAGTTTAGTTGTTTTTTCTTTTGGTTTTCGAGGTGCTT	-0.605594	565	262
YBL023C:50:0	CACCTCTTTGCCTCTTTTCTAAGAAGTATAACACAACTACAATATAAGTG	0.265359	117	130
YBL023C:60:10	ATACTCCACACACCTCTTTGCCTCTTTTCTAAGAAGTATAACACAACTAC	0.408757	326	418
YBL023C:85:35	ACATTTTGGTACAGTTTACTTAATAATACTCCACACACCTCTTTGCCTCT	-0.231659	344	232
YBL024W:6:0	ATAAGG	-0.19371	13000	9119
YBL025W:50:0	TCATAAGCACTATATTTCGAACGTTAACCTAAATCTCTCCCACTAAGAAA	0.247858	98	107
YBL025W:68:18	ATATCACGCTACAAAAATTCATAAGCACTATATTTCGAACGTTAACCTAA	0.693063	73	125
YBL026W:42:0	ACTTTCGAACACATATCTCACGCTGATAACACCCTAGCAAGT	0.0290772	242	212
YBL027W:50:0	TAGATCTTTTCACCAAATCGAATAAAAAGTCACCAATAAATTAGAGGAAA	0.160847	0	0
YBL027W:52:2	GATAGATCTTTTCACCAAATCGAATAAAAAGTCACCAATAAATTAGAGGA	0.160847	0	0
YBL028C:22:0	AAAACTTACTAGAACAAGAATC	0.681051	1315	2213
YBL029C-A:117:67	ACGTTATAAAACAAGCGGCTGAAGAACAAGTTGGGAATAAATGTCAGCAA	-1.04313	29	8
YBL029C-A:50:0	TGAAATCAGATAAGCAACTTAATACACAACCTCAAAAAGAAAAAATTACC	0.160847	0	0
YBL029C-A:75:25	GTCAGCAAGGAAGATTGGTGTAAAGTGAAATCAGATAAGCAACTTAATAC	0.209637	19	20
YBL030C:119:69	TGCAATACATCTACAAGTCAAAGGAGCCCCTCTATATTATTTATATTTGT	0.160847	0	0
YBL030C:144:94	ATTCACTGTTAGTTATACGGAACATTGCAATACATCTACAAGTCAAAGGA	1.25946	0	2
YBL030C:50:0	CTCTTTTATACTTCAGAATCATACATTAACATACATATAAGCAAATAGCC	0.610763	43	68
YBL030C:75:25	ATTTGTCGTTGTTCTTTTTTGTGTGCTCTTTTATACTTCAGAATCATACA	-0.243007	309	206
YBL031W:34:0	AATTACAGCTCTAGAACACATATTATCTTCATGG	-0.708393	3424	1435
YBL032W:50:0	GCATCAACTTATCGGGTAACTTAGAGACAGCATTAGTATATATACCAGCC	-0.0789795	135	106
YBL032W:65:15	CCCCTGTACAACAAAGCATCAACTTATCGGGTAACTTAGAGACAGCATTA	-0.183994	47	33
YBL032W:90:40	ATTGCTCCCCACTCCTATCGCGCGTCCCCTGTACAACAAAGCATCAACTT	-0.457868	439	236
YBL033C:16:0	ACAACAAACCTACAGG	0.205847	4518	4726
YBL035C:50:0	AAAGCTTGAAGGTAAATTTAGGCAGGAGCAAGTGACTGAAAAAAAAAAAA	0.160847	0	0
YBL035C:53:3	AACAAAGCTTGAAGGTAAATTTAGGCAGGAGCAAGTGACTGAAAAAAAAA	0.543839	14	21
YBL035C:78:28	AAGATAATTGATTGTCAATTGGTTCAACAAAGCTTGAAGGTAAATTTAGG	0.160847	20	20
YBL036C:49:0	AGGCATCACTCTTTCCTTTTTGACTAAGATTCCAGCATCACATTGCAAT	-0.0961583	427	330
YBL037W:50:0	ATCGAGTTTCCAATTTCGCAACCTTTATTATAGTACTAATCTTATAAGCC	-0.00883846	345	291
YBL037W:55:5	AGTCAATCGAGTTTCCAATTTCGCAACCTTTATTATAGTACTAATCTTAT	0.340872	217	260
YBL037W:80:30	AGGAACGTTACAGTTGGAATTTGCTAGTCAATCGAGTTTCCAATTTCGCA	0.234086	657	707
YBL038W:50:0	GGAAGTTGATTACCTTTCACCAGAGGTACAGAGGAATAGAATTTTGCAAC	-0.422157	291	162
YBL038W:57:7	ATTGCCGGGAAGTTGATTACCTTTCACCAGAGGTACAGAGGAATAGAATT	-0.119231	130	98
YBL039C:50:0	AGTTTCTCAGTGAATTGGTCAATAGAACAAAAGAAACTTATAGACAGAAA	0.160847	0	0
YBL039C:54:4	AGGCAGTTTCTCAGTGAATTGGTCAATAGAACAAAAGAAACTTATAGACA	0.566312	25	38
YBL039W-B:125:75	CCAGATACATAAGTATAAGAATTTCTCGGCAGAGATTATATACAATAAAG	0.160847	0	0
YBL039W-B:175:125	AAAAAAAATTAGAAATTGAGGAGGGGAAGGTATTCTAACCTGGTGAATTC	0.160847	1	1
YBL039W-B:225:175	TAGCTTTTAGCTTTGAGAGCGATGAAGCAAGAGAGAAAAATAAGGGTAGA	0.160847	0	0
YBL039W-B:260:210	AATTGAATTCCTAATAACACTTTTGTTTGCTGTATTAGCTTTTAGCTTTG	-0.398769	6	3
YBL039W-B:285:235	GAATATTATTTTTCTTTCACGACTCAATTGAATTCCTAATAACACTTTTG	0.160847	0	0
YBL039W-B:50:0	ATAGTAGCGTGAATAACAATTTACTTTAATCAATCGTTAGGATACTTCTA	0.014243	21	18
YBL039W-B:75:25	AATAAGGTTCAGTTGGACGATTGCGATAGTAGCGTGAATAACAATTTACT	-0.714622	47	19
YBL040C:32:0	ATACGCGCAAGTTGAGGCATAATCAGTAAGCA	0.169375	1400	1412
YBL041W:31:0	AAGACTATTGAACTATAAAGTTAAACAAAAT	0.776163	206	382
YBL042C:50:0	ATAAAAGGCGGTAACTAGTCCTCTCATTCATTAATTCTATATAAGAGAAA	0.75683	53	97
YBL042C:56:6	GCGGAAATAAAAGGCGGTAACTAGTCCTCTCATTCATTAATTCTATATAA	0.209637	79	83
YBL043W:108:58	AGCTACATACCAGCAGAAATTTTTTATAGTATTACACTATACATCCAAGT	0.498258	151	212
YBL043W:133:83	ATGACCAAAGAAAAAATAAAAAGACAGCTACATACCAGCAGAAATTTTTT	0.160847	0	0
YBL043W:50:0	AATTATTTATTGTTTTTCTCACATAGAAAATTCCGCATACTGCGATTATA	0.44479	133	177
YBL043W:75:25	ACACTATACATCCAAGTTTTTTCACAATTATTTATTGTTTTTCTCACATA	0.199876	200	208
YBL045C:124:74	AACGAATCCTAATATTAAATTGCTACCATTGCTGATCAAGACAATTGTGG	-0.219428	195	133
YBL045C:50:0	TCGTCACCATATCACTGAGAAAGAAAACACAAGATATATAAACAAAAAAA	0.160847	0	0
YBL045C:75:25	GAGTAATAATACGAGAAGAACATCATCGTCACCATATCACTGAGAAAGAA	0.160847	0	0
YBL046W:8:0	AAAAAGCT	-0.139842	5313	3933
YBL047C:125:75	AATTACTGGTTCTCGCGAAATAATATAGCGCGTTGAAACTAATAAATAGA	0.21349	110	116
YBL047C:171:121	ACAACAGAGCACTTTGTGATAGGCAATAGAGTGCTTTTAAATAGAGAATT	-0.369782	50	29
YBL047C:50:0	TTTCCTGTTTTTATCTGTGTGTTTTCAATAGGATTCGAACGATATAGGCC	-0.623272	183	83
YBL047C:75:25	TTCGTGAAGCTCTAGATCTATCTTTTTTCCTGTTTTTATCTGTGTGTTTT	-0.445681	850	463
YBL049W:125:75	TTACAAGAATAGGCGAGGTTGTACGAACTGCAAACTAGCTGCAAATTAAT	0.338053	97	116
YBL049W:175:125	TACTAAACTCAACACATTACAGCCCAATATTATAAATACGTTCTTCTTCG	0.181466	191	195
YBL049W:206:156	CAAAGACAGAACTCTGTCCTACTTTATCTATTACTAAACTCAACACATTA	0.871693	27	56
YBL049W:50:0	AGTAGCAGCACTGAAGGAAAAGGGAGAAGCTTATCTTACTGTAGAAGAAA	0.160847	0	0
YBL049W:75:25	TGTAACACTTAAGTGGAGAGCAGAGAGTAGCAGCACTGAAGGAAAAGGGA	-1.73627	79	11
YBL050W:50:0	TACGACTCGAGAATATAGTAAGAACACCATCATTAACCTGAAAGTTAAAA	-0.349979	4	2
YBL050W:67:17	ATCTGAACTAACTTCTGTACGACTCGAGAATATAGTAAGAACACCATCAT	0.0338468	108	95
YBL051C:50:0	CATAGAGGCAGGCTACAGACTAGGGAAAGCGTGTTCAACAACAATAAGAA	0.234954	51	55
YBL051C:63:13	GTGATATAGTACTCATAGAGGCAGGCTACAGACTAGGGAAAGCGTGTTCA	-0.556692	165	80
YBL052C:125:75	AAGAAAGAACGAATATAAAAGGTAAAAAAGGAAAAGCATTGCTATTCTTT	0.160847	0	0
YBL052C:163:113	AATAGCACAGAAACAAAGCATATTAAAAGAGGCAAAAGAAGAAAGAACGA	0.160847	0	0
YBL052C:188:138	ATTGTTTGAAATAAAGAGTCGGGAAAATAGCACAGAAACAAAGCATATTA	0.160847	0	0
YBL052C:50:0	CTCTCTCTTCTTCCTTCTTCATTAATTAGTCTCCGTATAATTTGCAGATA	-0.549692	463	227
YBL052C:75:25	TCTCATAGGTGTTATTCATACCGCCCTCTCTCTTCTTCCTTCTTCATTAA	-0.425438	1595	887
YBL054W:111:61	CTGGCAAATCTCCACTGCTTGAGTCATTAAAACTACTCACTCAAGAAGGC	0.471001	76	104
YBL054W:50:0	AGTGGGTAGAGAAAAGAATATATCACTGTTCTTATTGAAGTTCCCTCGCG	-0.572306	203	97
YBL054W:75:25	TCACTCAAGAAGGCATATACACGACAGTGGGTAGAGAAAAGAATATATCA	-0.193699	66	46
YBL056W:50:0	AGGCAGACGAAGAAGGCCAAGAAGACAAATCGAAGAAAGAGAGAGATAAC	0.0774649	24	22
YBL056W:55:5	ATTATAGGCAGACGAAGAAGGCCAAGAAGACAAATCGAAGAAAGAGAGAG	0.160847	0	0
YBL056W:80:30	ATTCATTTTACTTTTTGAAGTTTCTATTATAGGCAGACGAAGAAGGCCAA	0.362788	142	174
YBL057C:20:0	AACATGATAACGTCTTTTTA	-0.644804	3824	1708
YBL058W:41:0	AAGAAACGTCGGTAGCACAACAATTAACTCATTATTTAGGT	0.567031	462	694
YBL059C-A:22:0	AAGATAAGACAAGTACTACAAC	0.654167	3157	5171
YBL060W:50:0	ATGGTACAATTTTGTGCAGTCAATGGACTATTAAGGGATCGCAAAGAGGT	-0.742021	36	14
YBL060W:62:12	AAGGCTGACTAGATGGTACAATTTTGTGCAGTCAATGGACTATTAAGGGA	-1.12608	133	36
YBL061C:104:54	AGGTGTTGGCACTTGACTTTAGACTTGCTGTTAATAAGCCTTCCATTGTA	-0.484079	586	307
YBL061C:50:0	ACCAGGTTCTCGTCTTTTTTGGTGATAAAGTTAAAATAAAAGGATAAAAA	0.160847	0	0
YBL061C:75:25	GTTAATAAGCCTTCCATTGTATACTACCAGGTTCTCGTCTTTTTTGGTGA	-0.636385	434	195
YBL064C:50:0	AGATTCTCGCAGTAGGATGAGATAAATTTCAAAGAAGCAGGAAGCAAAGG	-0.59944	76	35
YBL064C:68:18	ATAGAAAATTGTGCTTCTAGATTCTCGCAGTAGGATGAGATAAATTTCAA	-0.512098	97	49
YBL067C:125:75	TACCAGATCTTACCCTTTGACTGTTCAACTCATCAAGCTTTATTTGTTGA	-0.61844	520	238
YBL067C:175:125	TCACCTGTTCATTTTTTTTTTTTCCATTTGGATAATATTATTATTGCCTA	-0.362119	220	130
YBL067C:225:175	CAGCAAAGGAATCAATAGAGTTTTTCTTTGGTTTTCAAATTGATTTTTTT	-0.49788	256	132
YBL067C:262:212	AACGTAATTGAACTATTGTGTGAAAGAAGGTCGACAACAGCAAAGGAATC	0.160847	0	0
YBL067C:287:237	AACTATAAAGATAAAGAACCCAAAGAACGTAATTGAACTATTGTGTGAAA	0.505687	16	23
YBL067C:50:0	GATCCAGTACTTTCATTAACATACTAAACCCACGCAAGAAGGGCGCAATC	0.0765862	98	90
YBL067C:75:25	AGGGGCCAAATTCGGCTTTAGTAAGGATCCAGTACTTTCATTAACATACT	-0.00560169	149	126
YBL068W:49:0	AATGCACATAGACTCTCAGCTTCAACTCCACAAGGCTTCTCCAGCAAAA	-0.658594	176	77
YBL069W:50:0	TCCGGAAGCTACAAATACGACATTGCATACCAAGAGGCAAACGTTGAACA	0.280035	78	88
YBL069W:72:22	ATATTCCCACCTTGTCGAGCATTCCGGAAGCTACAAATACGACATTGCAT	-0.0846539	146	114
YBL071W-A:43:0	ACGACTGTAAGCACATCATTTGTACAATACATTACCAGCTGAA	0.0725539	283	259
YBL074C:14:0	ATCGGAAGCCTGCA	-0.14857	10464	7679
YBL076C:8:0	AAGGAAAT	0.0376706	6065	5362
YBL078C:50:0	TCTAATAATTGTAAAGTTGAGAAAATCATAATAAAATAATTACTAGAGAC	0.637771	17	28
YBL078C:57:7	AAGAGAATCTAATAATTGTAAAGTTGAGAAAATCATAATAAAATAATTAC	0.160847	0	0
YBL078C:82:32	ATTAAAGGTTGAGGAGGGGATTGATAAGAGAATCTAATAATTGTAAAGTT	0.160847	0	0
YBL079W:50:0	CGGACAAAAAAGCAGAGTGCGTTTATTACTTCTCTTTCTAGCGGTTGTTC	-0.669871	318	138
YBL079W:53:3	AAGCGGACAAAAAAGCAGAGTGCGTTTATTACTTCTCTTTCTAGCGGTTG	-0.454914	86	46
YBL080C:50:0	AGTGTTATTGTTAGCATTCCTGTCCAAAAAGACCAGAGTAGGAACTAGAT	-0.672063	22	9
YBL080C:58:8	CTAGTAATAGTGTTATTGTTAGCATTCCTGTCCAAAAAGACCAGAGTAGG	-0.244619	185	123
YBL080C:83:33	GACGTGATGTACTTAGTCGTACCACCTAGTAATAGTGTTATTGTTAGCAT	-0.714622	119	49
YBL081W:125:75	TGATACGACTTTTTTGATTTCCATTATTATTATTTGTTACTATTATTATT	-0.427701	262	145
YBL081W:175:125	GCATCGTGGCACCTAGAACAAGAGGTACCTTCCATCCTTCGCTTAATATT	-0.317741	935	579
YBL081W:225:175	TTTCCAGCTTTTTCTCTTTTTCCCATTCGTTTTTCCTGATCTTTTTTTCT	-0.602164	1970	918
YBL081W:275:225	CACTATCCAATAGTGCAAAGCAAAAGCAGCATAGAAAAAAGAGAATCCCG	0.625152	21	34
YBL081W:314:264	AGCACAGAAGAGATAGGCAATCAGTTTAGATACTACAGACACTATCCAAT	0.647502	66	108
YBL081W:50:0	AATAATTTTCTTTTTTTTTTTTGGCTCTATTTCACTAAGACATCGTATAT	0.934036	59	129
YBL081W:75:25	TATCATTTGGGTTTCGGTTTTTTGTAATAATTTTCTTTTTTTTTTTTGGC	-0.788596	229	88
YBL082C:125:75	GGTGCTGTAAACAAGCTAAAGAAATTTCGCTATCGAACTTAAAGAACAAC	0.0496209	37	33
YBL082C:175:125	AGCCTTCCATGTAAAATGCATTTGCCGTCACATTCTGTGTGCGGTTGCTG	-1.02743	1095	333
YBL082C:225:175	CATTAGAGATTTCCCAATCTTACATGACTCTTTATTGCTGTTTTGTAGAT	-0.223373	162	110
YBL082C:257:207	CCCAAAATTGTTGCAACAAGTATGGAATGTCACATTAGAGATTTCCCAAT	-0.699355	51	21
YBL082C:282:232	ACAGGGTCGTACGACGCAGAAGCATCCCAAAATTGTTGCAACAAGTATGG	0.160847	0	0
YBL082C:50:0	CAGTATCATAGAGTGTGTATGGGAGAGAGAAAGAGTTAGATACTAGTAGT	0.234954	12	13
YBL082C:75:25	GCAGTACACTAGTTGGGAGTGAAAACAGTATCATAGAGTGTGTATGGGAG	0.343168	4	5
YBL084C:50:0	ATTCATAAATCGACACGAACTTTTCGTGCAGGATACATAATAAAAATAGC	0.195333	113	117
YBL084C:73:23	TCTGTTTTGGTGACTGCATATCTATTCATAAATCGACACGAACTTTTCGT	-0.377378	369	215
YBL084C:98:48	ATACCTAGCTGTGAGAGTTTTAGACTCTGTTTTGGTGACTGCATATCTAT	-0.313611	269	167
YBL085W:125:75	AGGCAATTCTTCGCTCTATCAAGCAGTTTTACTGCGTCTGTCTAAAGAAA	-0.539964	261	129
YBL085W:175:125	CCTTAGGATACTTTCTGATTTACATCCGAAGAATTGGGTGCGTCAATTAA	-0.402334	280	159
YBL085W:215:165	GAAAAAAAAAAGGAAAAAGAAACTGAAAACTATACGCTTCCCTTAGGATA	0.160847	0	0
YBL085W:50:0	AGTTCTAACTCGAGGTGACCGGAGGCCACTGTAATAATAAAAAATAGAAG	-0.133145	105	78
YBL085W:75:25	CAATTGTTTTACTGAATTTCAACAAAGTTCTAACTCGAGGTGACCGGAGG	-0.265238	97	63
YBL086C:124:74	AAGTACGGTGACAACGGCAAAGCTCACTTGCTAATGAAGGAGTGAACACC	-0.807146	128	48
YBL086C:50:0	GAAGTATTAGGTACCCAAGAAAGGTATAATACCGCTCACAAAATATTAAG	-0.0833504	59	46
YBL086C:75:25	CTTCTAATTTCATTCAGGTTGCTTAGAAGTATTAGGTACCCAAGAAAGGT	0.0774649	74	68
YBL087C:23:0	AACACACCTATATATAACTAATA	0.750843	1606	2898
YBL088C:50:0	TTCGAAAAAAAAGCCTTCAAAGAAAAAGGGAAATCAGTGTAACATAGACG	0.160847	0	0
YBL088C:56:6	AGGAAATTCGAAAAAAAAGCCTTCAAAGAAAAAGGGAAATCAGTGTAACA	0.160847	0	0
YBL089W:50:0	GAACGAACAGCAAGATAAAGTGGAAACGAAAAGTAAGCAGCTTCCTCAAT	0.436318	308	406
YBL089W:64:14	AAATACTGTTGCTCGAACGAACAGCAAGATAAAGTGGAAACGAAAAGTAA	0.517521	6	9
YBL090W:31:0	GTCAAATATCACCCATAAGAGCATAACCATA	0.266849	777	864
YBL091C-A:13:0	AGACGAGTAAACA	0.655504	4376	7177
YBL091C:31:0	AAGTACTGTAGAAGCTCTACCGTATTGAAAA	0.229707	504	540
YBL092W:125:75	ATGGGAAAATTTTCTCCGGAAGATTGCATGCGAGAGTCTCATAACCAGTC	-0.159461	134	97
YBL092W:175:125	GTTTACTGGTACACCTAGAGTTAGCCGATCAAAGAGACAGTGGCAGATAT	0.160847	24	24
YBL092W:225:175	ATGAAATGTCCAATTTGAACTGATTAACATACACGCGCAAGCTCGTATTT	0.160847	0	0
YBL092W:275:225	CGTTTGATATTTGTGGCGATTGGAACAAACATAGTACATGCCAAAATGAG	-1.29444	59	13
YBL092W:325:275	CATATAGAATGCTAGAATGAATAGCCTAGACTGCATTGTTATGAGAGCAA	-0.107417	16	12
YBL092W:371:321	ATAATCACCAAACAGGGACAATACACTGAACGATAAAAGTATGTGACATA	0.160847	0	0
YBL092W:396:346	AATTAGTTCATTCTCTTTTACAAAGATAATCACCAAACAGGGACAATACA	0.160847	0	0
YBL092W:50:0	CTGTTATACTAACAAACTTTTAATTTTCATTTTTTTTTTTTTTTGATTAG	0.171373	188	190
YBL092W:75:25	ATTTCCCAAGATACAATTCTCGGAGCTGTTATACTAACAAACTTTTAATT	0.533826	72	105
YBL093C:50:0	AGTGAGTGCGAATAGCAATAGTAAGTGAACGAAAAAGGAATACGATAATA	0.160847	0	0
YBL093C:55:5	TCTGTAGTGAGTGCGAATAGCAATAGTAAGTGAACGAAAAAGGAATACGA	0.160847	0	0
YBL093C:80:30	AACAGGGTGGAACATAAAATATAGATCTGTAGTGAGTGCGAATAGCAATA	-0.423101	51	28
YBL097W:50:0	ATCTTAGTGGACTTTTTGGAGCAAAAAAAACCAGCAGGTAGTTATATAAG	0.955776	13	30
YBL098W:20:0	AATCTGTTTAACTTGAAAAT	-0.118626	2587	1956
YBL099W:125:75	AAAAATATAATCGAGAAGTTTTTTTCCTCATCGCGAACCATTAGTATAAC	-0.330785	429	262
YBL099W:175:125	CAGGCATATATACTCGACGTCAAGAAAGAAAAGAAAAGAAAACCCTCATA	0.160847	0	0
YBL099W:225:175	TTACTCCCTCTCTTTTTTCGTTTTTAACTGATTTCTCATATATTCCCAAA	-0.464092	339	181
YBL099W:262:212	TCTTATTAGATTGTCTCCATCTTTCCCATTGACGTTGTTACTCCCTCTCT	-0.338971	782	474
YBL099W:287:237	ATACTGTCATAGCTCTTTCAATTGGTCTTATTAGATTGTCTCCATCTTTC	-0.190413	762	536
YBL099W:50:0	TATCGCAAGAACAGTAACAAAATAAATAAAAAAAACACGCACATATAATA	0.160847	0	0
YBL099W:75:25	AGATTGATCGTTCAGCTCTCATAACTATCGCAAGAACAGTAACAAAATAA	0.902784	19	41
YBL101C:125:75	TTATTGCTCGGAAGGTCTGTCTTAGCTCTGAGATAAGCCACGTTTATATT	0.0269534	789	690
YBL101C:175:125	AAGAGGGGACAAAAAAAGGGACGAGAAAAAAAAAATAGAACGACTCATTA	0.160847	0	0
YBL101C:225:175	TGACTCTTCCAAGGGTTCTCCACTTTCCCGCCTATATTTCTAATTTTGTT	-0.195475	1617	1132
YBL101C:259:209	TATCCATTGGTCTTAATTTTTCCAATCTCTGATCTGACTCTTCCAAGGGT	-0.600354	455	212
YBL101C:284:234	ACACTCGATTCACAGGATCTGTAGATATCCATTGGTCTTAATTTTTCCAA	-0.479564	553	291
YBL101C:50:0	TCTTTTAAATAGAGAAGAACAAGCAAGATTTTTCCCTACCCCTATTGGGC	0.0433713	405	360
YBL101C:75:25	TTTGAAGGTCCATCGGAAAGGTGACTCTTTTAAATAGAGAAGAACAAGCA	0.160847	0	0
YBL102W:50:0	GTTGCGTTTTTTTTTTTTGCTGGTAAAAAAAAAGAACAAGTGTGGAGAAT	0.160847	0	0
YBL102W:63:13	TGTATTGTCTGCAGTTGCGTTTTTTTTTTTTGCTGGTAAAAAAAAAGAAC	-0.301777	53	33
YBL102W:88:38	AGTTTAGAGTAGGACTTAGATTACCTGTATTGTCTGCAGTTGCGTTTTTT	-0.260879	557	365
YBL103C:125:75	TACGTGAGCATATATAAGATAACAAAAACGACATTACTGCATTCACATTA	0.503791	21	30
YBL103C:175:125	GAGGCTGCACGGAATCATCAAGGAATTTTTCACAATCCGAATTTCTGTCT	-1.61565	64	10
YBL103C:225:175	TTACTGCAGGTTAGTACATTATTTTTTACTCGCAGTTGCTATTTTGGCTA	0.405043	93	119
YBL103C:254:204	ACTCGGTCCGGACAGTAGGATCTCCAATATTACTGCAGGTTAGTACATTA	0.0599206	124	112
YBL103C:50:0	GAATACTCTTATTTTTTGTCAGGCGAACCTACTTCTTAAATAAGTGAAGA	0.658933	78	129
YBL103C:75:25	CTTAGTTGACAAGTATCCTTTAATAGAATACTCTTATTTTTTGTCAGGCG	-0.222979	159	108
YBL104C:5:0	TAAAC	-0.0170819	10674	8934
YBL105C:125:75	GTATAGATTTTTAAAACTATATTAGATAATCAATAGGAATAAAACCTAGA	0.160847	0	0
YBL105C:175:125	ACCACTCGTCCACACTTACGTTAGAGGTATTCAGCGTCGATCCCCTTTCA	-0.337876	437	265
YBL105C:225:175	CAATTTGGCTGAGTAGAGACTGATTATTAACCATTGTAAAAGTCTCTGCC	-0.031665	216	178
YBL105C:270:220	CGACAGGTTCAGGAGCAGTAAAAGAGCTACGATTTCACTGCTATTCAATT	0.350838	367	444
YBL105C:50:0	GCGAGGAAAAGTAAGTATAGTATCACACATATAGGGAGCAGTTTACAGTC	-0.240042	108	72
YBL105C:75:25	ACAGTAGCTGCGGAGAGAAGCTCTAGCGAGGAAAAGTAAGTATAGTATCA	-0.298686	75	47
YBL106C:50:0	ATTATAAAAGTTACAAAATTGTCAATTGAACAGATACAAAAATTTTATAA	0.160847	0	0
YBL106C:67:17	ATTTCTAAAGTTGACAGATTATAAAAGTTACAAAATTGTCAATTGAACAG	0.323365	33	39
YBR001C:123:73	TAAAACTAATATTCTTTATTTCTCAATTTTATTTATTTATTTATATTTTT	-0.18144	68	48
YBR001C:148:98	AGCGCTTGTAGGAACTGTTTTCCATTAAAACTAATATTCTTTATTTCTCA	0.108887	78	74
YBR001C:50:0	GGTTCGGATCAGACATTTGGTATATAAGGAGACCTGCATATACTCAAATA	0.704462	35	61
YBR001C:75:25	TTCCTTTGCAAATATATTTGACGCAGGTTCGGATCAGACATTTGGTATAT	0.077669	212	195
YBR002C:21:0	TAAACACAGGTAAAAGACGGT	0.362656	956	1170
YBR003W:29:0	ATTCAGTCCGAATTGAGTACAGTGGGACG	-0.0101572	2951	2487
YBR004C:16:0	AAGACTAAATTAAAAT	0.47609	1332	1826
YBR005W:35:0	AAATAGGAAAGTATAACTCGAATTAAGAATAAGGA	-0.0427524	113	92
YBR006W:101:51	ATATTATTTCGCAACGTCCTTTATTGTTCTGTTCTTATTTGATCAATTAA	-0.850754	43	15
YBR006W:126:76	ATAAATACTCGTCAGAGATCAATAGATATTATTTCGCAACGTCCTTTATT	0.497319	54	76
YBR006W:50:0	CTAGAAAACCAGCTACATTAAAAGCAAATTTTACAAACTACTATTTCAAC	0.960603	39	88
YBR006W:75:25	TTCTGTTCTTATTTGATCAATTAAGCTAGAAAACCAGCTACATTAAAAGC	0.329311	108	128
YBR007C:50:0	AAACAGAAAATCTAGAAAAACAAACGGACTTTTACGTCACACGAAAAGTA	0.160847	0	0
YBR007C:65:15	AGGAGCCTCGAGAAAAAACAGAAAATCTAGAAAAACAAACGGACTTTTAC	0.314997	5	6
YBR007C:90:40	AATGCTAAATATAGGTGGAACTTGTAGGAGCCTCGAGAAAAAACAGAAAA	0.160847	0	0
YBR008C:125:75	GAAAGAAGACGAGAATTGCATTTAAACAGCTCTTTACGAGGCTAAAATAT	-0.937766	5	1
YBR008C:175:125	CAATCATCTGACTAATGGGCGGGATAATTAGTCAGGTAAAAGGGGAACAG	-0.558276	38	18
YBR008C:218:168	GCGAAAAGGGACATGATAGTACACATTTGAGTAAAATTGGTATCAATCAT	-0.865792	66	23
YBR008C:50:0	TTATGGTGAAGCTATTATAAAAGAGTATCCGTTGAACGACAATCTCCACT	-0.380495	121	70
YBR008C:75:25	CTACATCCTTATGCCGTCTTTGTCATTATGGTGAAGCTATTATAAAAGAG	-0.837682	227	83
YBR009C:39:0	AACAAACAAAAACAAGCAACAAATATAATATAGTAAAAT	0.160847	0	0
YBR010W:28:0	ATCTAACATAAATATATAAACGCAAACA	0.487031	655	908
YBR011C:39:0	AGGTCTATAGAACAGGATATCCCGCCGCGCAATTTACTA	0.126945	569	550
YBR013C:117:67	ATATACATCAACACTAATCTAGATAGCCTCGCTTCTTAAGTTAATTTTCA	0.485508	218	302
YBR013C:142:92	ACAGCTACACCAGGACAGCATACACATATACATCAACACTAATCTAGATA	0.437659	184	243
YBR013C:50:0	ATAGTACAAGGATCCGTATTAATTGCGTTTTTAGGCCACTTAACCTCATA	0.130484	534	518
YBR013C:75:25	AATTTTCAGAGATAGAAAAGACTTAATAGTACAAGGATCCGTATTAATTG	0.657283	27	45
YBR014C:50:0	AAGAAGCAAAATTTTCAAATTAAACGCAAAACAACTGAAGAAAATTAGAG	0.160847	0	0
YBR014C:60:10	ATATATTGGAAAGAAGCAAAATTTTCAAATTAAACGCAAAACAACTGAAG	0.523752	31	45
YBR016W:49:0	ATTGAAGAGACTCACTAGTAAGCTTAAGATAGTCCTACACACAACCACC	0.209049	161	169
YBR017C:50:0	TCCGCAGTCTTTGGTTTTCAGAATTGTTAGCAGTAGTTAAGTGAATAAAG	0.213956	54	57
YBR017C:52:2	ATTCCGCAGTCTTTGGTTTTCAGAATTGTTAGCAGTAGTTAAGTGAATAA	-0.254875	146	96
YBR021W:118:68	GATGATTAGGTATCATCTGTATAAAACTCCTTTCTTAATTTCACTCTAAA	-0.833193	126	46
YBR021W:50:0	ATCTTTCGGTTCGAAGACATTCCTACGCATAATAAGAATAGGAGGGAATA	0.00669583	62	53
YBR021W:75:25	CTCTAAAGCATACCCCATAGAGAAGATCTTTCGGTTCGAAGACATTCCTA	-0.411067	224	126
YBR022W:50:0	TGAGTTTATTAGTATCTTCTCCAAGATAAATATAGCATCAAGTTACAGGT	0.445167	148	197
YBR022W:62:12	ACACGAAAAGTTTGAGTTTATTAGTATCTTCTCCAAGATAAATATAGCAT	0.0673205	55	50
YBR023C:124:74	AGAAGAATCACATTGGTAGACGGTTATAAACGTTTACCGATTTGCAAAGT	0.402859	83	106
YBR023C:149:99	ATTTCGACTTGTAGTAAATCCTGCTAGAAGAATCACATTGGTAGACGGTT	-0.123333	189	142
YBR023C:50:0	CCATTTTCTTCAAAGGTCCTGTTTAGACTATCCGCAGGAAAGAAATTAGA	0.160847	0	0
YBR023C:75:25	TTCTCGAGTATTTTTGGTGTAGGTCCCATTTTCTTCAAAGGTCCTGTTTA	-0.622745	450	205
YBR024W:50:0	ATCTTTTATAATATCACCATAGAAAGGGGAATTTGGGAAGCGAGAGTAAA	0.853994	0	1
YBR024W:67:17	AAACAGCAGCTTACAGGATCTTTTATAATATCACCATAGAAAGGGGAATT	0.224025	45	48
YBR024W:92:42	ACGGATCGTCTACAATACCTTCGTAAAACAGCAGCTTACAGGATCTTTTA	-0.50849	165	84
YBR025C:21:0	AAATAAATAGCACTGTAAAAC	0.364879	728	893
YBR026C:21:0	AATTACATTTGATATAACAAG	0.41822	2394	3097
YBR028C:50:0	AGATTTTTCATCAACCAATCTAGCTGAGCATACTGTTGGCAGTAATTAGG	0.544053	211	310
YBR028C:75:25	TTTACCTGGAAGGTGCCCTATGATAAGATTTTTCATCAACCAATCTAGCT	-0.657878	321	141
YBR029C:50:0	CCAAACAGCGAACCTGTCATACTTAACTGTTCCACTTCCATATACCTAAA	-0.292021	161	102
YBR029C:55:5	TCTTCCCAAACAGCGAACCTGTCATACTTAACTGTTCCACTTCCATATAC	-0.102968	413	317
YBR029C:80:30	GTGAAGACGCACTTCTTGCCAAGTATCTTCCCAAACAGCGAACCTGTCAT	-0.833193	253	93
YBR030W:125:75	AATAAATATCAGAAAATCAAATGAAGTATACTCGATGAAGGCAGCTGAGA	-1.18289	22	5
YBR030W:175:125	TTCTCCGTTGAATTCTGAGATGTACTGCATCAAAATAGCGAAAAACGAGC	0.160847	0	0
YBR030W:225:175	TTATTTACATGGGCGTTTGTTTATGATTCTTTGTGCCTAATATATCCACG	-0.194052	481	337
YBR030W:271:221	AAGGTGGAGCTCCTGCAGATTGGTTTAGAAAGTAGTGTATTGATAGTTAT	-0.026277	333	276
YBR030W:50:0	ATTTGTTGCCATATATAATAGCAATTAAAAAATAAATTTGAAAGAGTGAG	0.339538	45	54
YBR030W:75:25	TGAGGTGGCAGATACAATAAGAAAGATTTGTTGCCATATATAATAGCAAT	0.637771	17	28
YBR031W:16:0	AAGAACAATCATCGAA	0.241955	4686	5082
YBR034C:14:0	ATCCAAAGAAAATA	0.256403	3320	3653
YBR035C:27:0	AGTACACTTCACGGATCTGCACTGAAA	0.0600863	2722	2461
YBR036C:48:0	GCTCTTGAGCTGGTGAGTTAGCACGATAACAAACAAAGATACAGCGTC	0.327901	10	12
YBR037C:41:0	ATAAGGCAAGGGAAACAGAAAAAACAGCAAACGTAGAAAAG	0.244228	68	74
YBR038W:41:0	ACATATAGACCCAAATAAAAACCAAAGAACCACATATAGAA	-0.903864	28	9
YBR039W:50:0	AGGTGGAAACAATTGAAGACGAGCAGTAAACATTATTTTATTTAGTAGTC	0.327168	104	123
YBR039W:62:12	TTGGTTAATTTCAGGTGGAAACAATTGAAGACGAGCAGTAAACATTATTT	0.0350771	109	96
YBR039W:87:37	AAGAAACTATTGAGACTGAACCGTTTTGGTTAATTTCAGGTGGAAACAAT	-0.0665433	117	93
YBR040W:125:75	CAAAGACATTGGTATATATTTGTAAAATGTCTGTTAAATGTTTTTTATCT	0.750315	65	118
YBR040W:157:107	AATGAAAACAATATATAGTGCTGTTGAAATAACAAAGACATTGGTATATA	0.160847	0	0
YBR040W:182:132	AAGTAGCAATGAAACGAACCAAGAAAATGAAAACAATATATAGTGCTGTT	1.3395	7	25
YBR040W:50:0	AGAAATTATAGTAAACAAACAAACAAACAAACAAAAAAAAAAAAAAAAAA	0.160847	0	0
YBR040W:75:25	CAGGTTCTTGCTTGTCTTTGGTAGAAGAAATTATAGTAAACAAACAAACA	0.0316348	65	57
YBR041W:50:0	TCATTCAAATTCTATATCGTTGAACTTTTAATAGGCTGCGAATACCGACT	-0.101518	129	99
YBR041W:53:3	AAATCATTCAAATTCTATATCGTTGAACTTTTAATAGGCTGCGAATACCG	0.123106	80	77
YBR042C:45:0	ATCAGGTCCACTGGTATTGAGATTGCTAGCGAGGTCAATAAGCTG	-0.160061	152	110
YBR043C:124:74	CAAAATTTGTTGTAATAGCTGTGTCCTTGTATCCTTAAAAGAAAACAGGG	0.0655363	10	9
YBR043C:149:99	ATCGATTAGATAAGATAGAAACCAACAAAATTTGTTGTAATAGCTGTGTC	-0.42694	8	4
YBR043C:50:0	TTCTAACTTGTTAACGTCTATGCTAGGACCGAAGTCAGAAAGCGATAAAC	-0.111087	41	31
YBR043C:75:25	GTTGAAGGCATATGTATTCACATCTTTCTAACTTGTTAACGTCTATGCTA	0.0516472	86	77
YBR044C:50:0	TTTTCTCCCACACTACTGTAAACATAAAACTCTCTTATGCTTTAACGAGT	-0.0709551	57	45
YBR044C:58:8	TGGCGTTATTTTCTCCCACACTACTGTAAACATAAAACTCTCTTATGCTT	-0.798195	226	86
YBR044C:83:33	AGTTTACCTTTTACGAGCTTTAACCTGGCGTTATTTTCTCCCACACTACT	0.0756368	856	786
YBR046C:31:0	AAGAGACGAGATCGCTAACAACAAGACAAAA	0.484443	669	925
YBR047W:50:0	GGAGTAAATCTTTGTTCTGTGAACATAACTGAAAAAAAATCAGTTCATCA	-0.058289	248	199
YBR047W:53:3	GTAGGAGTAAATCTTTGTTCTGTGAACATAACTGAAAAAAAATCAGTTCA	-0.18746	101	71
YBR048W:18:0	ATCAAGCCAGGGAAAAAG	0.284899	1960	2219
YBR049C:123:73	GCTGTGGACCCAACCTAAAGTAAATAAATAAACATCATCACAAGCAAGGT	0.088873	71	66
YBR049C:50:0	TTTGAACTCACGTGTTGCTGCTGAATTAGAATATTTATAGCTCAATCAAT	-0.0639763	148	118
YBR049C:75:25	GTTATCTACACACTATCGTTATTAGTTTGAACTCACGTGTTGCTGCTGAA	0.126497	384	371
YBR050C:125:75	TCTTCGCATGTCCGTCAAATTTAGCGTTGTCTCGAAACTTAGGCTGTCGT	-0.885556	708	248
YBR050C:152:102	CCTGGACGTACTGTTATATATGGCATGTCTTCGCATGTCCGTCAAATTTA	-0.825426	613	228
YBR050C:177:127	ATTGCTTCTTGAGTTGCAGCTTCTTCCTGGACGTACTGTTATATATGGCA	0.0950425	737	690
YBR050C:50:0	TAATATATTGGAATAAGAAAAAAAAAATAGGAACAAGAAAGTGTGTGAGA	0.776032	19	36
YBR050C:75:25	TCTTGCTGTCTGTCTTCTGATAAAATAATATATTGGAATAAGAAAAAAAA	0.160847	0	0
YBR052C:50:0	CCTCCAGCATACTACTCACTATTATAAGCACATACTACGCCACATAGATA	0.0798053	166	153
YBR052C:64:14	ATCGAACATCAAGACCTCCAGCATACTACTCACTATTATAAGCACATACT	0.492749	93	130
YBR053C:12:0	ACTTTTCGTAAA	-0.308777	5253	3284
YBR054W:125:75	TTTTAATTCCAAACAATCTAATAACGTTTAACCACTAATTCTTTAATTAT	-0.282359	80	51
YBR054W:175:125	AAAACTAATAGCTTATTCTGGTTATTTTTAATCAATCTAGAATTTTTTTC	-0.317525	191	118
YBR054W:225:175	AAGTCCTAAGAACTTACCATAATTTTTTTTCTAAAAACCCTTTTTTACTC	0.442098	116	154
YBR054W:275:225	AACCCGAAAAAAACTATCTATTTATCTTTGGATACTTTAACATAGACAAG	0.638285	66	107
YBR054W:314:264	AAGTGTCAAGATTGTGTCAGCAAATAACAGTAATATTCCAACCCGAAAAA	-0.660134	124	54
YBR054W:50:0	AATTTTCCTGATAACTTAAAGTGACACTATTTTTTAAAAAAAGCATCAAA	0.160847	0	0
YBR054W:75:25	TAATATTTAATTTTAAAAATCTTCTAATTTTCCTGATAACTTAAAGTGAC	0.53122	28	41
YBR055C:24:0	AACAGCAAGAAAACGTCACATTTT	0.0870062	3160	2935
YBR056W:125:75	AGGGGGGATGGATGAACTAAGACATAACTTTCTTTTCTTCAATTCGAACT	-0.840602	244	89
YBR056W:50:0	AGACTCTCTATCCATCTATAAAATTTATTAAAACTTTTGAACTGCACAGA	0.404193	97	124
YBR056W:75:25	CTGTTGGGAAGAGTTGCTTTAAAAAAGACTCTCTATCCATCTATAAAATT	0.516397	88	126
YBR057C:50:0	TGACCTCATTCTTTTTGCATACACGGCTCGTTTGGAATACTGTTGTAAAA	-1.24607	48	11
YBR057C:65:15	CTTGATCTTTTGATTTGACCTCATTCTTTTTGCATACACGGCTCGTTTGG	-0.758355	859	342
YBR057C:90:40	AAGAAGAGAATCAGCTGGCTTGGTACTTGATCTTTTGATTTGACCTCATT	-0.183388	387	274
YBR058C-A:50:0	GAGTGTAGAAACCGGAAGAACAAAGGTGGAACATATCATAAGGGGAAGAA	0.160847	0	0
YBR058C-A:59:9	AGAGATAAAGAGTGTAGAAACCGGAAGAACAAAGGTGGAACATATCATAA	0.547619	35	52
YBR058C:24:0	CCGAAGTCTTTCTCACATTCAGAA	-0.0848003	3920	3066
YBR059C:111:61	AGGACATCATAGAGATAATTTTAGTTGCCATTCATTTTTTGCTATTACGT	-0.120848	443	334
YBR059C:50:0	CTTGTTTTCGTCCCTGTCGCCTGTTATTTTCTTTCTAATTAGCACTGATC	-0.372215	287	168
YBR059C:75:25	TTTTGCTATTACGTTTTCCCAAGCTCTTGTTTTCGTCCCTGTCGCCTGTT	-0.320101	1175	726
YBR060C:118:68	ACCTTTAAATTAAGACAAAGTAGAATATATTAGCTGAAATTGTATTTGAT	0.576362	32	49
YBR060C:50:0	TTTGCTATATCTTTAAAACAAGTTTTTGTAGTACTGCGAATTGCCATAAC	0.0430635	89	79
YBR060C:75:25	ATTTGATAATTGATCATTGATCTTATTTGCTATATCTTTAAAACAAGTTT	0.386519	78	98
YBR061C:7:0	ATTCAAG	0.354996	8432	10239
YBR062C:31:0	ATATTCATCAAACATAATCACAATCAAAAAA	-0.0303308	430	355
YBR065C:50:0	AGGTGAATAGAAGGTAGCTAACGGAAAAGAGTTATTGCACCCTTAATATA	-0.0199015	126	105
YBR065C:72:22	GATGATGGAAGGGCTTTTGAGCAGGTGAATAGAAGGTAGCTAACGGAAAA	-1.60274	69	11
YBR066C:50:0	TCGCTACTGTTCGAAGAACAAAAAATATAAAGCTTCTACAAAATTTCCAG	-0.244619	26	17
YBR066C:52:2	ACTCGCTACTGTTCGAAGAACAAAAAATATAAAGCTTCTACAAAATTTCC	1.38951	11	40
YBR067C:50:0	GTAACAATAATTGCTATTGCATAACTATACCCTCTGCTAAATAAAATAAA	0.552889	99	147
YBR068C:39:0	AATTTATTTAGCTTCAATAAAACTCAAGTGATTTTAGAA	0.787154	115	216
YBR069C:105:55	AGACCATAAAATAGTCTGAAATTAATACATAGAACCAAGCTGTATTATAA	0.468673	85	116
YBR069C:50:0	CTTTACCACCGTAGCTACCTAATATAGTTTCTCGATAAAAAGGCGTAAAA	-0.456463	164	88
YBR069C:75:25	AGAACCAAGCTGTATTATAAGGTGCCTTTACCACCGTAGCTACCTAATAT	-0.31475	250	155
YBR070C:50:0	CGGCGGTTTATTATTGTATCAGGAAAGTCGAAAGAAGTGACTTGAAGATC	-0.495259	211	109
YBR070C:53:3	AATCGGCGGTTTATTATTGTATCAGGAAAGTCGAAAGAAGTGACTTGAAG	-0.0358638	55	45
YBR071W:50:0	GAACATACCAACTATATATTGTGACGGCACAAAAAGACAAAATACGTAAA	0.160847	0	0
YBR071W:72:22	ACGAGAAATATACGACGATAAAGAACATACCAACTATATATTGTGACGGC	-0.234466	48	32
YBR072W:50:0	TATTAAAACAGGTATCCAAAAAAGCAAACAAACAAACTAAACAAATTAAC	0.160847	0	0
YBR072W:74:24	ACCGATAAAGATATATCAGATCTCTATTAAAACAGGTATCCAAAAAAGCA	-0.0755423	37	29
YBR074W:5:0	ACGGC	-0.215895	16128	11065
YBR077C:50:0	AAAAAAAGGCAGTTATCAGCAGCAAACGGTATCCAAAATATTGAAGCAAT	0.755554	31	57
YBR077C:59:9	AAGAAGAAAAAAAAAAGGCAGTTATCAGCAGCAAACGGTATCCAAAATAT	0.160847	0	0
YBR078W:125:75	ATCGTTCATTCGCTTCTACACAGTTTAATCTTTTCCATTTTTCTTTCAAC	-0.102056	371	285
YBR078W:151:101	AGAAAAGAAATTAAATAAAAGAGTTAATCGTTCATTCGCTTCTACACAGT	0.160847	0	0
YBR078W:176:126	ATCTTTGAGTACTTCGGCCACTTTTAGAAAAGAAATTAAATAAAAGAGTT	0.0945971	77	72
YBR078W:50:0	CGTTTATTTGACTTTTAAAGATCTAGTTTTAATTTTACTATTATTCCGCA	0.573166	726	1097
YBR078W:75:25	AAGTCCCTTTGAGCTATCAAGAATACGTTTATTTGACTTTTAAAGATCTA	0.173586	77	78
YBR079C:25:0	ATACAAACGCCCAGGAAACATCAAG	0.64213	583	944
YBR080C:26:0	GTATATTCAGCCTTTATAAATTGAGT	0.308054	3385	3922
YBR081C:121:71	TTTTATTTATTTAGCAAGTCAAACAATAAGATCTTTCCTTTTTTCAGATT	1.03632	9	23
YBR081C:146:96	ATTGGAGAAGTTGGCAAAATACATCTTTTATTTATTTAGCAAGTCAAACA	0.622952	142	226
YBR081C:50:0	TGTTGGTTACTCTTTAAACTGTAACACTACAAAGAAATTAAGTCTGAATA	0.160847	0	0
YBR081C:75:25	GATTGAACTTCGGATCAGTGAAAATTGTTGGTTACTCTTTAAACTGTAAC	-0.450893	506	274
YBR082C:50:0	TAAATTTCACTGACTATAGAGTACATACATAAACAAGCATCCAAAAAAAC	0.314997	23	27
YBR082C:65:15	ATCGCCACAAGTAAATAAATTTCACTGACTATAGAGTACATACATAAACA	0.160847	0	0
YBR083W:47:0	AAGAAGAATAATCCACCTATTTCAACAATTCTGATACCTGTTTAACC	-0.711642	133	55
YBR084C-A:50:0	ATTGATTTTACGCTTCACATAGAAAGTTGATTAAGAACTCCAAAGCAAAA	0.317416	58	68
YBR084W:14:0	AAGGCTAAAAGGAA	0.100527	1844	1736
YBR085C-A:29:0	AACTACAATAAATTACATTATACTATAAC	0.598148	947	1467
YBR085W:50:0	CTCAATTGAAGACGGTTTACCTGAAGTGATATACTGTGCCTTGAGAAACA	-0.0942801	412	319
YBR085W:64:14	GTGAGTATAATTAACTCAATTGAAGACGGTTTACCTGAAGTGATATACTG	0.438867	77	102
YBR086C:125:75	GCTCCAATAACCGTTCTCACCATCATTAACATTTTTGAAGGTGAATACTG	-0.104463	441	338
YBR086C:175:125	TCTATAAGGGAAGCTGGAAATAGGGGGCTGGAAAAGATATTTGAACAGTC	-0.161622	155	112
YBR086C:225:175	TATTATTGACTTCATTAAGAAATATCCCTTTTTTCCCCGTTGCAATTATT	-0.179819	238	169
YBR086C:275:225	ATAAGCACTTTCCATATTTTTCAACTGAAAAATAGTTTTCTTTTTGCAGC	-0.0958733	264	204
YBR086C:303:253	GTGAAAGACTGTAAAAGCTTTCTGATAAATAAGCACTTTCCATATTTTTC	-0.222879	90	61
YBR086C:50:0	TCAAATACATTTGAAAAAGATTAAAACAAGCACAAGCGGTTGAGCATACT	0.566312	5	8
YBR086C:75:25	TTTCGGTCGATTTATGGCTAATTTGTCAAATACATTTGAAAAAGATTAAA	0.160847	0	0
YBR087W:11:0	ACAGCACAAAC	0.0848751	5453	5054
YBR088C:40:0	AAGCAGCAAGCACTAAGTACGCAGTCAAAAGAGAGAAAAA	0.590409	40	62
YBR091C:41:0	ATCGGAGCTCCCGTATAATATTAAAGTGCACCAAGAAAAGG	0.0185303	195	169
YBR092C:14:0	ATTCCAAATTACCT	-0.194361	7294	5113
YBR093C:35:0	AACAACAAATAGAGCAAGCAAATTCGAGATTACCA	0.510117	243	345
YBR094W:50:0	ACTTGATCTCTGACATTAAAAATTCGGAAACAATAAATATTTCTTTTAAG	0.105584	92	87
YBR094W:66:16	AAAGGCAGCCGCTCTGACTTGATCTCTGACATTAAAAATTCGGAAACAAT	-0.558276	77	37
YBR095C:40:0	GAGAAACAAATATCTCAGCTGTTGCTTCTTGTTGATCGAG	-0.0642121	391	312
YBR096W:50:0	CGAGTAACTAGTGCTTTCCAATATCTACAACAAAATAAAATAATAGAATA	0.160847	0	0
YBR096W:57:7	GGTTTCTCGAGTAACTAGTGCTTTCCAATATCTACAACAAAATAAAATAA	0.344411	133	160
YBR096W:82:32	GCTTCTAATTTCAAGACTTCCAAAAGGTTTCTCGAGTAACTAGTGCTTTC	-0.519313	305	154
YBR097W:31:0	AAGGTTATCAAAAAGGAAGGCATACAGTATA	0.241734	545	591
YBR101C:50:0	ATTACCTTTCAACGAAAGAGTAAAATAGAAAAAAAAACACATACATAACT	0.573379	46	70
YBR101C:72:22	ACTCATCGTCAGTCAGAAAGCCATTACCTTTCAACGAAAGAGTAAAATAG	0.160847	0	0
YBR102C:31:0	GACTGAAAGTTGAAATATTTGTACTGTGAAA	0.104199	689	651
YBR103W:125:75	AACACCTTGGTGCGAAATTGAAGGTTTTTTTTTCCAAAGAAGTGTACAGC	-0.175626	209	149
YBR103W:160:110	ATTCGTTTTGATTTGCAATTAGTGAGAACAATTTAAACACCTTGGTGCGA	0.238405	123	133
YBR103W:50:0	TAAAAATAACAGAAACAAAAAAAAGGTAGGGAAGGCCCATCACACGGAAA	0.160847	0	0
YBR103W:75:25	CCACACTAACAACTGCTAACTCAGATAAAAATAACAGAAACAAAAAAAAG	0.160847	0	0
YBR104W:50:0	AACAGAAAAAAGCGGCGCAATAATTTCGTGTATTACAATTACAGTTAGTC	0.264031	137	152
YBR104W:63:13	GGTAGCCATAAAGAACAGAAAAAAGCGGCGCAATAATTTCGTGTATTACA	0.372156	50	62
YBR104W:88:38	GATACAACTGTAATTGATAAATAGGGGTAGCCATAAAGAACAGAAAAAAG	0.160847	0	0
YBR105C:26:0	ACCAACACATATCGCAAGCTTGAGTC	0.0512361	2619	2347
YBR106W:33:0	ATAACACAGCACAAGAGAACCGAGCAGCCCGCC	0.216416	1609	1701
YBR107C:21:0	AACGTACTTCCTTTGGATGGA	-0.641713	5769	2585
YBR108W:15:0	AAGTTATCAACCAGC	0.034641	6974	6147
YBR109C:39:0	ACAAAGAAAGAGCTTAGTTAATACAAATAAAAAAGTACA	0.495216	67	94
YBR110W:125:75	CTTCAATAGAACGCGCATATAGCAATCATCAAGTTAATTGGTCATATATC	0.192595	92	95
YBR110W:175:125	GCTTGTTGCTAAAACAAGGTCAATCCAAGCAGTGATCATCTTGCACGTTG	-0.280986	223	143
YBR110W:215:165	ATGCTTTGACTGTGACTTTCCTGTCTGATATCTTTGTATGGCTTGTTGCT	-0.811585	750	283
YBR110W:50:0	TTAGAGGGTAATTGTAACGGCATTTTAGGGGCTATAGTCAATTGGTGAAA	-0.448218	56	30
YBR110W:75:25	TTTCAATCAGCAATTAGCAAAGCCATTAGAGGGTAATTGTAACGGCATTT	-0.0168347	42	35
YBR112C:125:75	CCCGTTACCTCTTTTCCCATATTTCTGTTTTTCTTTTTCACTGCTATAAG	0.112837	575	548
YBR112C:169:119	GCCAAATACGACAACGTCACTAGTCTTTGAACCAGAGGCGTATTCCCGTT	0.232156	229	246
YBR112C:194:144	AATTGAGAGAACTAGAATCAACAAAGCCAAATACGACAACGTCACTAGTC	-0.309157	175	109
YBR112C:50:0	ACAGCAACAACAACAAACAAAACACGACTGGAAAAAAAAAATTAGGAAAA	0.160847	0	0
YBR112C:75:25	CCTTTAGACTAGTACTACAACTACAACAGCAACAACAACAAACAAAACAC	0.63085	44	71
YBR114W:118:68	AAGGACTAATAAAACCGACAGTATAACGACGTAATGCTGCGTGGTGTTTT	-0.930493	136	45
YBR114W:50:0	GTAATTTTAGATACTCTTGGCCGTATAACTGGTGTACCAACTGAAAAATC	-0.0387665	104	85
YBR114W:75:25	GTGTTTTCAAACCTTAGTAGTTTTGGTAATTTTAGATACTCTTGGCCGTA	-0.868773	433	154
YBR115C:50:0	TTCAGTGAAAAACTGCTAATTATAGAGAGATATCACAGAGTTACTCACTA	0.637186	58	94
YBR115C:62:12	CTTTCCTGGAATTTCAGTGAAAAACTGCTAATTATAGAGAGATATCACAG	0.528571	8	12
YBR115C:87:37	ATAAAAAAAAATCTGAGTTTATTACCTTTCCTGGAATTTCAGTGAAAAAC	0.160847	6	6
YBR117C:125:75	AATGCAGAATTATTCCATTTATTTCAGTCGTATATTCAATTGGCTTGTCC	-0.629204	627	284
YBR117C:175:125	TTGTCAAGAGAATACCAGATCACCTGTTTGGATATATAAACGAGTGTAAT	1.0119	37	88
YBR117C:212:162	CTGAATAAGGAGTGTCGAATATAGGGAGCTTCATTCGTTGTCAAGAGAAT	-0.570041	26	12
YBR117C:237:187	CTACTTCTCCTTGTTGGGAGGAGTCCTGAATAAGGAGTGTCGAATATAGG	-0.958385	146	47
YBR117C:50:0	AACCTCTACGTAGACGATTATACCTTACTAATCAAAAAAAGAACAAAAAA	0.160847	0	0
YBR117C:75:25	CCTCTTACTGTAGTCTTCGATTTGTAACCTCTACGTAGACGATTATACCT	-0.434141	222	122
YBR118W:22:0	AACGAACTATAATTAACTAAAC	0.608345	1583	2477
YBR119W:40:0	GCTATCAACAAAAGACGGCCTCATCAAACCTAAAGAAACC	-0.31206	137	85
YBR120C:50:0	CTCTATCAGCTTACCAAGTTAAACTCCGTATTCCACAAGCAAGTGCCAAA	0.374421	41	51
YBR120C:58:8	AACATTCTCTCTATCAGCTTACCAAGTTAAACTCCGTATTCCACAAGCAA	0.00400404	371	317
YBR120C:83:33	AAGAAAAAAAGGTAGCCTTCATTGAAACATTCTCTCTATCAGCTTACCAA	-0.00822982	179	151
YBR121C:50:0	GTAGACGATTTTACTCTCAGATTGTTAAAAAATCGGTTAAGATTAAAAGA	-0.819983	7	2
YBR121C:52:2	CAGTAGACGATTTTACTCTCAGATTGTTAAAAAATCGGTTAAGATTAAAA	1.37724	7	26
YBR121C:77:27	AAGAAAAATTGTCGTTCTTCAATATCAGTAGACGATTTTACTCTCAGATT	0.434199	368	484
YBR122C:33:0	AACGCAAACGAACACACGTTTTGTTCACTCCTA	-0.0602627	2086	1672
YBR123C:50:0	AATTAATCTCTATAGCTTTCAAGAGCGAAAATATCTTCCAAATCGTGAAA	0.0867385	13	12
YBR123C:68:18	ATACCAAGGGAAAAACATAATTAATCTCTATAGCTTTCAAGAGCGAAAAT	0.588291	14	22
YBR125C:125:75	GCATCTTTTTCTTCTTTCTTAGCACGGAGCCCTTACGTCTTCTTTTCTAT	-0.302438	1334	839
YBR125C:154:104	GGATCTCTAGTTTTACGTTGTTTTCAACTGCATCTTTTTCTTCTTTCTTA	-0.22299	868	591
YBR125C:179:129	ATTGGCTACATAAACAATTGACATTGGATCTCTAGTTTTACGTTGTTTTC	0.131399	447	434
YBR125C:50:0	TCCCCTATATAGCCATTTTAGAAAGTAACTTCAATTTGAAGAAGACAAAA	0.160847	0	0
YBR125C:75:25	CCCATCGCCCTTTTTGCCTCTATTCTCCCCTATATAGCCATTTTAGAAAG	-0.0595536	363	291
YBR126C:107:57	AATTGAGTTTCTGTCAGTTTCTTCTTGAACAAGCACGCAGCTAAGTAAGC	0.00669583	405	347
YBR126C:50:0	CAGGCTAACAAACTAGGTACTCACATACAGACTTATTAAGACATAGAACT	-0.650084	17	7
YBR126C:75:25	GCACGCAGCTAAGTAAGCAACAAAGCAGGCTAACAAACTAGGTACTCACA	0.160847	0	0
YBR127C:50:0	TGCGATTGTAAGAGTAGACAGTACATCAAGCGAAAATAAATATTGCAGGA	0.160847	0	0
YBR127C:64:14	ATTGTTGACAGGATTGCGATTGTAAGAGTAGACAGTACATCAAGCGAAAA	0.343168	39	47
YBR128C:32:0	GTAAAAGTTAAAAACTAGAATCCTAGTATGAC	-0.820679	957	358
YBR129C:35:0	ACGCTAATTTTGCCTTGGTAAATTTCATAAGACCA	-0.112384	915	696
YBR130C:50:0	AGCTCGTCTATCAAGCACGCCAAGGTTCAACGACACTACTTTTGTGTAAG	0.0330131	24	21
YBR130C:60:10	ACCAAACGTTAGCTCGTCTATCAAGCACGCCAAGGTTCAACGACACTACT	0.197548	213	221
YBR131W:44:0	ATTCTAAATCGTACAACTATTAAATTGATATATGAAAGACGGAT	0.596165	21	33
YBR132C:111:61	AGCTCCTTTGCTTTAAGATACTAATAGGTGGTAATTAAAAACAATAGTTT	-0.215631	50	34
YBR132C:50:0	TGTCCCCCCTAAGCTGCACTTACATTTTGCTTCCATAACTTTTGCCAAGC	-0.46302	1156	619
YBR132C:75:25	AAAAACAATAGTTTTCCTTCAGCCTTGTCCCCCCTAAGCTGCACTTACAT	0.0636828	161	146
YBR133C:113:63	ATTTCAAATTGCGTGTGTGAAAGCGTGTGTGTGTGTGTGTGTGTGGAATT	-0.58372	418	198
YBR133C:50:0	TCTTCTTTTATACATATAATTTTTATATATACAAAGGGTTCAGTTTGCAT	-0.42694	71	39
YBR133C:75:25	GTGTGTGGAATTGTGCGGACGTTCCTCTTCTTTTATACATATAATTTTTA	0.186599	229	235
YBR135W:50:0	GCGTTGGATACAACTAGATTGACACGCACTTACTCTCGTCTTACAGTACT	-0.327373	276	169
YBR135W:75:25	TCGTAAGTTCTTGGAACTGCTGGCCGCGTTGGATACAACTAGATTGACAC	-0.218286	430	294
YBR136W:50:0	AGGCTGGACAACAAGAACGACATACACCGCGTAAAGGCCCACAAGACTGC	0.144674	186	183
YBR137W:50:0	CCTTATTATAAGAGCAAATTATTCAAAAAAAGTCTACGGAGAAAATTATT	1.14168	2	7
YBR137W:67:17	GAAACAACCTAATCAAGCCTTATTATAAGAGCAAATTATTCAAAAAAAGT	0.160847	0	0
YBR137W:92:42	AAGGACTATCTCGCATTTCAAAAGAGAAACAACCTAATCAAGCCTTATTA	0.611263	115	181
YBR138C:50:0	TAGTCTCGAAAACTTGATCCAACCACTAATTAAAAGGTTAAAATTAAAGG	0.160847	0	0
YBR138C:69:19	AACAAGTCACAGATTGGAATAGTCTCGAAAACTTGATCCAACCACTAATT	0.263501	147	163
YBR141C:20:0	GATACCACTAATACAGCGGA	0.279049	3179	3578
YBR142W:47:0	AGGTAGAAATTCTTTAGTCAAATACCGGCATAATCAGTTTTTCCATC	-0.300651	678	427
YBR143C:39:0	ATTAAGACTACAGAAATAGACAAAGGAAATACTTCAATA	0.160847	0	0
YBR145W:41:0	AAGAAAATTATTTAACTACATATCTACAAAATCAAAGCATC	0.720462	27	48
YBR146W:50:0	ATTGATTAGCTAAAATTTACTCGTTGTGGACAGAGTTTGAGCCAAGCGGA	-0.0743175	271	214
YBR146W:63:13	AGAAATTGGTTAAATTGATTAGCTAAAATTTACTCGTTGTGGACAGAGTT	0.233167	119	128
YBR148W:125:75	ATAATTTTTTTAACTTAATCACACCAACAAAAACAAAAAAAAGCTAAAAC	0.177654	58	59
YBR148W:162:112	GAAGGGGACAAATTCAACTATTCACTGTAGTCATCTAATAATTTTTTTAA	0.160847	35	35
YBR148W:187:137	ATCCATAGAGGAAAAAAAGTGACAGGAAGGGGACAAATTCAACTATTCAC	-0.274472	67	43
YBR148W:50:0	TATTGCACCGGTGTATTAACATATATAAGGATACGTACGAACATAACATC	-0.114257	78	59
YBR148W:75:25	TAGGTTGAAGGATTTTAAGAGAAGTTATTGCACCGGTGTATTAACATATA	-0.151287	551	403
YBR149W:50:0	ATCTCCGCCTTCAATTGATAAAAGCGTCTTGATTTTAATCAACTGCTATC	-0.310758	124	77
YBR149W:69:19	ATCTGGACTTATTTGCACTATCTCCGCCTTCAATTGATAAAAGCGTCTTG	-0.100763	264	203
YBR150C:31:0	AATGATTACAAGCCCAGCAGGAGTTGTGTGA	-0.633252	1030	465
YBR151W:113:63	ATAACATACTGGTTTTCTTTCTGTTCGAGGTATAAGAAAAGAAAGTACTT	-0.102444	107	82
YBR151W:50:0	GGAGGCAAGAAGGCGGCCAAGAGAGAGATATCTTCTTTGTCCTTTGAATT	0.531079	336	487
YBR151W:75:25	AAGAAAGTACTTGGCTATATTCGGAGGAGGCAAGAAGGCGGCCAAGAGAG	-0.39033	58	33
YBR152W:50:0	CCACCGCTAGATTAAGAATTTTTTTTGGTTACTGATTTGAATCACATACG	-0.0842759	229	179
YBR152W:54:4	ACCGCCACCGCTAGATTAAGAATTTTTTTTGGTTACTGATTTGAATCACA	-0.240594	123	82
YBR153W:50:0	ACCAACCTATTGGTAGCTTCTTTGTATTACTATCAACATTTTTAGAAGAT	0.170603	101	102
YBR154C:50:0	GGGATTTACAAAATTTGTGCGCAGGTGGATATTACTAATAAGCTAAGACA	0.426128	78	102
YBR154C:66:16	CAAATTAAATTAGTAGGGGATTTACAAAATTTGTGCGCAGGTGGATATTA	-0.101518	64	49
YBR154C:91:41	AACAGATCACGAGCCAATTTGAATTCAAATTAAATTAGTAGGGGATTTAC	0.160847	0	0
YBR155W:45:0	ATTCTAGCAAGTAAAAGAAAAGAATAAATTGGTTTTGCATCTAGA	-0.0248706	117	97
YBR156C:37:0	AACTGACGGACTTTGAAAGAGCCCGAAGATTTAAACA	0.0491025	680	608
YBR157C:50:0	CTACACCACCTTCGTTATTACTTCACTGAAGTTTCCCTTTCCAGCAAGAT	0.268877	560	624
YBR157C:72:22	ATACTTAATAAAAATTTATACTCTACACCACCTTCGTTATTACTTCACTG	0.730428	270	478
YBR158W:125:75	TCTTTGAATTTGGTTTAATATCCCTTTTTGGTTTAATATCCATCCATTCC	-0.69311	652	277
YBR158W:175:125	TTTTTCTCTGTTTATTTCTTCTAGAACTTATACCTGTCTTTTCCTTTTAT	-0.608528	435	201
YBR158W:225:175	TAAAACTATATGTGTTAACTGTACAAAAATAACTTATTTATCATATCATT	0.623816	106	169
YBR158W:263:213	AAGGCCCAAGGGAACTAACAAAAACGTTCAAAAAGTTTTAAAACTATATG	0.763022	22	41
YBR158W:50:0	TCGTTTGATAATTTATCATTTTCCTTTTCTGTTAGTAAAGTACCCATTAA	-0.501615	352	181
YBR158W:75:25	TTTCACTTAGAACTAATAATTCCCTTCGTTTGATAATTTATCATTTTCCT	-0.700636	283	119
YBR159W:25:0	AATTCGTGTCGGTGCAGCTTAAGAA	0.151499	5158	5110
YBR160W:106:56	AAATTTAATACTGCTTTTCCAGAATATCATATTGGAAAAAATATTCAAGC	0.160847	0	0
YBR160W:131:81	GGAAGGACCAAGTCCTCTTGAAAGAAAATTTAATACTGCTTTTCCAGAAT	-0.323899	163	100
YBR160W:50:0	ATCAGCTACAGTGGAAAATAGCCCAGATCAAATAGAACTATCCTTCGAAC	0.160847	0	0
YBR160W:75:25	TTGGAAAAAATATTCAAGCCAGCACATCAGCTACAGTGGAAAATAGCCCA	-1.13844	10	2
YBR161W:125:75	TTTTATTAGCTTCCTCAAGGAGCGCTGACCGTATATAATATAATTTCAAC	0.298564	297	341
YBR161W:175:125	CGAGACGGGTATTGTTTTTATTTCCTTCATTATTTACATCGCAACACGAT	-0.468559	470	250
YBR161W:202:152	AGAGTTTCATTGTCACCGTTGAATAACCGAGACGGGTATTGTTTTTATTT	-0.0127085	476	400
YBR161W:227:177	AAATTCATTGCTCTTTGAATTTTGAAGAGTTTCATTGTCACCGTTGAATA	-0.214073	402	276
YBR161W:50:0	TGCACCTTACAACAGTGCTAAAGTAGTTACAGTAAACCAATTAATACGTG	-0.697815	58	24
YBR161W:75:25	AACCGAACAAGGCAGTGCGAAGCGGTGCACCTTACAACAGTGCTAAAGTA	0.389688	34	43
YBR162C:125:75	TCAAACCAACCTAACTTATCCAACTTCTAGTCACTCCTTCAATAGAACGT	-0.273192	70	45
YBR162C:175:125	TTTATATTATAATTATTTCTTTTCTCGCAAGAAGACTCCAGAATCAAAAC	0.803563	60	115
YBR162C:213:163	CTTTGCTAGTTAAACTTCTTATCTCCATTCAATTTTTTTTTATATTATAA	0.0330131	174	153
YBR162C:238:188	ATCTCTACTTTTTATATCTCTCGAACTTTGCTAGTTAAACTTCTTATCTC	-0.0512268	538	435
YBR162C:50:0	ATTTACACCCCATAAAATATCTAAAACCTAACGGAATTTGAACGAAAAAA	0.160847	0	0
YBR162C:75:25	CTTTTTCTCACCTTTTCGTTTTTCCATTTACACCCCATAAAATATCTAAA	0.129496	161	156
YBR162W-A:35:0	GCAGAGGTCGAAGTAGATAGAGGACAACACCTGCG	-0.133051	537	400
YBR163W:50:0	TTTTCTTAATTTTTCAAGTAGGCTTTCTGCTTTTCTTCTGTACTTATCGT	-0.922262	383	129
YBR163W:59:9	CTGTCTTTGTTTTCTTAATTTTTCAAGTAGGCTTTCTGCTTTTCTTCTGT	-0.882336	192	67
YBR163W:84:34	ATAGTACACAGAAAAGCTTTGTAGACTGTCTTTGTTTTCTTAATTTTTCA	0.0202646	243	211
YBR164C:119:69	AAAGGATTGCGTGGTTCATTTGTATTTACGAAACGGTGAGTAATAAGGTT	-0.249734	195	129
YBR164C:50:0	TAAAGAAAGATCTAAGAAGAAAGTTCCAGTAAAGTGAGTTATAGATCAAG	0.160847	0	0
YBR164C:75:25	AAGGTTTCTAAAACCAAAGGAAAAATAAAGAAAGATCTAAGAAGAAAGTT	0.160847	0	0
YBR165W:50:0	TATAAGAGCTAAACAGATTTTTTTATATTTTAATCAAAAAGCTAATAATT	0.773951	12	23
YBR165W:67:17	TTTGTGCGAGGAGGCGATATAAGAGCTAAACAGATTTTTTTATATTTTAA	0.42681	127	166
YBR165W:92:42	AATCTAACGTTGCCTTTGTCGTGATTTTGTGCGAGGAGGCGATATAAGAG	0.280035	236	266
YBR166C:50:0	GAATACCGTAGCACTTGAAGGAAAGAGGACAGCATATCCACTTGATAAAC	-0.532301	29	14
YBR166C:52:2	AAGAATACCGTAGCACTTGAAGGAAAGAGGACAGCATATCCACTTGATAA	-0.798929	93	35
YBR167C:36:0	GACGGTCAAAGAAGAAAAGAGAACTCTGCACCCAGG	-0.144841	933	687
YBR168W:102:52	GAAGAAGGTGCAATCACTCGAAACTACTTCATACTTTCTCTTTTCTTTCA	0.0319128	371	326
YBR168W:127:77	AACTGCAAGGGTAAACAGAATTGATGAAGAAGGTGCAATCACTCGAAACT	-0.151528	81	59
YBR168W:50:0	GATCTTAATTTAGTTCAGTGGACATCATTTTGCTAATTTCAAGGAAAGAA	-0.714622	11	4
YBR168W:75:25	TTCATACTTTCTCTTTTCTTTCATTGATCTTAATTTAGTTCAGTGGACAT	-0.620162	213	97
YBR170C:50:0	GAAGAAAAATTTCCCTATACTACTGATATCGATATACATTTAAGTGAAGT	0.578582	26	40
YBR170C:73:23	GGCAAATAATAGGACAGTACTCTGAAGAAAAATTTCCCTATACTACTGAT	1.07305	48	121
YBR171W:26:0	ACGCACAACTACTTGAGTTTGCCAAT	0.243761	2995	3254
YBR172C:111:61	ACACACGCAGTTCAGTGGTCTCTTCGAGTTCATCATTTCCATTCGTACTC	-0.151245	704	515
YBR172C:50:0	ACCTTCCTTCCTCCTCCCCTATATACTCAACTTCTCAGCCCACATCAATA	-0.121481	682	514
YBR172C:75:25	TTCCATTCGTACTCCTTGAGCTTTTACCTTCCTTCCTCCTCCCCTATATA	-0.0866435	1714	1338
YBR173C:28:0	AAGACCAGAAACAGCCTGCATACCAACT	-0.155166	1789	1304
YBR175W:13:0	ATTATATGCTAAC	0.123996	7600	7325
YBR176W:109:59	ACCAGCCTATACAAAAGCTTAGTACAGATTACCTACTGCATTGATAGCTA	0.229839	55	59
YBR176W:134:84	ACATCTCGAAGAACTCGCGCCTTAAACCAGCCTATACAAAAGCTTAGTAC	-0.175626	139	99
YBR176W:50:0	TTGTTAATAAATTAGCTTGCCATAAAATTAGGGAAATTTTTACTCACAAT	-0.140259	49	36
YBR176W:75:25	ACTGCATTGATAGCTAGCATCTGTCTTGTTAATAAATTAGCTTGCCATAA	-0.00560169	299	253
YBR177C:31:0	GTAAAAAACAAAGCTCATAAAAGTTTCCGAT	0.433144	392	515
YBR179C:50:0	AACATTATCTGATATCACGGATAGAGGCAAAACGGTAGGCTCATTTAACG	-0.294629	40	25
YBR179C:65:15	ACATCCGAACATAGCAACATTATCTGATATCACGGATAGAGGCAAAACGG	0.190405	99	102
YBR181C:50:0	TGGAAGTCATTAATTGAAACTATCCAGTGTGAATAGACGACTGAGCCATC	-0.621532	163	74
YBR181C:53:3	ATTTGGAAGTCATTAATTGAAACTATCCAGTGTGAATAGACGACTGAGCC	0.53554	10	15
YBR182C:125:75	GGGAGAAATATACGAGCCAAATTCAAAGACAGACTATTTTTTCGAGCAGG	-0.199436	118	82
YBR182C:163:113	CATCATTCCTTTGAGTCTTTCTTTATCATTCATTCGAAGGGAGAAATATA	-0.475682	205	108
YBR182C:50:0	TAAAGCTCTAGATAAGCAAACACAATTATTTTCAAAAAAATTTCTGCTAA	0.853994	0	1
YBR182C:75:25	CCTATCTCATCAGAAAAAAATTTAATAAAGCTCTAGATAAGCAAACACAA	0.343168	14	17
YBR183W:125:75	TATATCTATATATCCTATATACATCTATATAGTTATTGTGTAAGGGGTTT	-0.567392	57	27
YBR183W:175:125	CGGGTAGCATTTTATTTTTATCGCTTATAGGAAAAAGATATTTGCATATA	-0.056218	163	131
YBR183W:209:159	ATCTGTCTCCGGTTATATATGTCTAAATAGAATTCGGGTAGCATTTTATT	-1.78506	6	0
YBR183W:50:0	TTAATTTGTAAATAAAAGCAGAAATCTTTATTTAAGAAAATAGAAGATTG	0.160847	0	0
YBR183W:75:25	TTATAAGGTCCGATACTTACAGAGATTAATTTGTAAATAAAAGCAGAAAT	0.160847	0	0
YBR185C:19:0	ATTCAGCTAAGCTTATGAG	0.038168	3992	3531
YBR187W:50:0	AAGTTAGGTTCTACAAAGCAAGATACAAATACGAGGCCATCGAGTATTCA	0.061474	147	133
YBR187W:59:9	ATAAAGCTAAAGTTAGGTTCTACAAAGCAAGATACAAATACGAGGCCATC	0.736211	8	15
YBR187W:84:34	CTACAATCTTGTTTGTGGAGTCTATATAAAGCTAAAGTTAGGTTCTACAA	0.448529	41	55
YBR188C:50:0	ACATCTACTTTTTTACGACTTACTTGTTGCGACTACTTTTTACAACCAGT	0.541814	426	624
YBR188C:75:25	AGCCGTTCCTTCAAAGCCTTCCATTACATCTACTTTTTTACGACTTACTT	-0.0898217	662	515
YBR189W:38:0	AAGAAAGAAAGCAACAAGACAACTAAGACTAAGCAACA	0.614514	107	169
YBR191W:50:0	ACCGATTGAACTTTGGAATAAGAGAACCAAGACAAAAATAACTAGCAACA	0.160847	0	0
YBR192W:125:75	CTAACTGAGGTAAAAAAATCGGACGATTTTGTCTTTACGTGGTCCTATAT	0.0273151	223	195
YBR192W:50:0	CTTACATAGTTGACCATTCTCATATCCCATAATTTTTCAAGGAGATAAAG	0.136154	40	39
YBR192W:75:25	TTATTGTGTCAAAGTCACCTACTTACTTACATAGTTGACCATTCTCATAT	0.291581	178	203
YBR193C:50:0	GAGAACCCCGAGCAAGAAGAACAAAAGAAAAACATAAAGCAACGTGGAAT	-0.804234	20	7
YBR193C:60:10	ATCGATATAAGAGAACCCCGAGCAAGAAGAACAAAAGAAAAACATAAAGC	0.160847	0	0
YBR194W:50:0	CCTTTTAGTTCTCGCATTCCATCATTTTATACTATATACGTTTGAGCTTA	0.218778	502	532
YBR194W:69:19	ACCTTCAAAGTCATCCAATCCTTTTAGTTCTCGCATTCCATCATTTTATA	0.0535348	284	255
YBR196C:35:0	CAAAATCGATTTAGAATCAAGATACCAGCCTAAAA	0.415773	1442	1861
YBR197C:23:0	GCTGGCACGAACGAAGACAAATA	0.0263652	2256	1972
YBR198C:50:0	AAAAGATACGAGAAACTCCGGGTTCAAGTTGAGATACTTGAAAAATAAGA	-0.33163	17	10
YBR198C:74:24	ATAAGGGTAGGAAAAGAGAAGGAGAAAAGATACGAGAAACTCCGGGTTCA	-0.265672	143	93
YBR199W:50:0	AGAACACAATTTTTAGTTTAGACCCAACAAGGTGAACCATACGAACTGAT	0.692726	46	79
YBR199W:68:18	ACAATAGGCCGTTACAGCAGAACACAATTTTTAGTTTAGACCCAACAAGG	0.562136	159	238
YBR199W:93:43	ACGGTGTTGCACGGCTGTATAATATACAATAGGCCGTTACAGCAGAACAC	-0.517912	137	69
YBR200W:50:0	TGCACGTTGAAAGCACTGTGTGAAAAGAAATTGTCAAGAAAGCCATATAA	-0.302438	88	55
YBR200W:55:5	ATGGATGCACGTTGAAAGCACTGTGTGAAAAGAAATTGTCAAGAAAGCCA	-0.676195	96	41
YBR201C-A:121:71	TTTTTCTTCTTTCCTCTCCTCTCCTCTCTTTTATATTCCACATTTATTCC	-0.723258	1604	662
YBR201C-A:146:96	CCATCTGCAAACGGACACCAAGTTTTTTTTCTTCTTTCCTCTCCTCTCCT	-0.326206	1052	646
YBR201C-A:50:0	GAATTTTTTTGTAATATATAGGAAATATCACAAAAGATCGAGGACTAACA	0.160847	0	0
YBR201C-A:75:25	TTCCCTGTGACAAGGCGAAAACCAAGAATTTTTTTGTAATATATAGGAAA	0.160847	1	1
YBR201W:111:61	AAAGAACAAAATATTCCTATAGTTTTGCTGAACATAGTTTTTATTGAAAG	0.452983	111	149
YBR201W:136:86	ATAACAAAACAGATAGACACCTAATAAAGAACAAAATATTCCTATAGTTT	0.652254	51	84
YBR201W:50:0	TACAGCAGAGATTTCGTCACCAACAGAAGAAAAGCTAAAGCCCAAGCAAT	0.584661	35	54
YBR201W:75:25	GTTTTTATTGAAAGTTTAGAAGAATTACAGCAGAGATTTCGTCACCAACA	0.0475178	55	49
YBR202W:30:0	AGGAAGAACTCAATACAGATAGACCAGATT	0.158881	1527	1524
YBR203W:125:75	GAAAATCCCGGACGATAGTATTTTTAGCTGAAGAATATTTGCGGGGAGGA	-0.710708	152	63
YBR203W:175:125	CTATTTTATTCCGTTTACTAGATTATATTTGAAGATATTTTTTTATTCTT	0.140227	195	191
YBR203W:225:175	CTCTCAAACTAATATAACCTTTACAAACCTGTCCGCTCAGTACGGTAGTC	0.0818581	78	72
YBR203W:275:225	ATAAGTATATATATATATATATTTATATAGTCTATATATATATAGTCCCA	-1.27424	20	4
YBR203W:303:253	ATCGATCTCCATCCCTACTGTCAAAAATATAAGTATATATATATATATAT	0.160847	0	0
YBR203W:50:0	GGGAAAAGGAGAAAGAAAAAAAGGTACACTAAACAAGGTCGAGTGTATTG	0.0511476	76	68
YBR203W:75:25	ACTATATAGACACTCGAAGCAAGAGGGGAAAAGGAGAAAGAAAAAAAGGT	0.57461	79	120
YBR204C:50:0	TAACTCAACGTTAGAAGAAAGCCTTAAACCGAGAACTTTTTCTCTTGGTA	-0.371485	234	137
YBR204C:62:12	GCATTTGGATCGTAACTCAACGTTAGAAGAAAGCCTTAAACCGAGAACTT	-0.329978	164	100
YBR205W:47:0	AGGCCTCGTCTGCGGACAACAACACTATCAATATCCAGCGTGCAATT	0.00224148	749	639
YBR207W:50:0	AAAAACTCTAAGAATAGAGAACTAGAGTGGTGTTCATATTTCTAGTCACC	0.160847	0	0
YBR207W:52:2	GAAAAAACTCTAAGAATAGAGAACTAGAGTGGTGTTCATATTTCTAGTCA	0.0430635	35	31
YBR210W:38:0	AACTGCAGGCACCAAGAAGTTCGAAGCCAAGAGTAAAG	0.109021	296	281
YBR211C:113:63	AAGGGTCAACATCGTTGCAGTATAAGAAGCGATTGCTCTCATTTTTTTAC	-0.18008	134	95
YBR211C:50:0	CTCTGTATTGTCTTGACTATTTGCGTGTTCATTTAAAGAAAAACCTCAGT	-0.745135	192	77
YBR211C:75:25	TCATTTTTTTACGTGTCCTGTGTTGCTCTGTATTGTCTTGACTATTTGCG	-0.329225	905	554
YBR212W:125:75	TAAAGGAGGCTTTTTTCTTTCCCTTTCGTTCTGATTTATATTGTTTTTAC	-0.162768	509	368
YBR212W:175:125	ATTTTTTTCCCGGTTCATTTTTTGATATTCTCTTCCTGTTCCAATATTAA	-0.395636	238	136
YBR212W:225:175	TTCTGATTTCTCGTGATCGAATCTGTTATATTGTCATATATTGTAATTCC	-0.400033	197	112
YBR212W:275:225	TTCATAGTTGTACGGAAAACCATCTGCGTGTTATATCCTAGTTCCAAATA	0.160847	87	87
YBR212W:325:275	AATAAAAGAGATTACCATTCTTATTCACTATTTTTTTTTTTCTCTGACTC	0.343168	124	149
YBR212W:375:325	ACCCTGTTCCCTTTAGAACCAATATACATAGACGCAGTCGACAAAGAAGC	-0.403683	50	28
YBR212W:406:356	AAGCATATTTGTAATTAAATCTGGTTATCATACCCTGTTCCCTTTAGAAC	-0.116785	131	99
YBR212W:50:0	AGCTTTTTCATATCCTTCGCCATCGATTTTTGCCTGAAAAATTTACACAA	-0.0527276	389	314
YBR212W:75:25	TATTATTGGATCTTTTAAATATTACAGCTTTTTCATATCCTTCGCCATCG	-0.0248139	719	597
YBR213W:125:75	GATGGACACACACACACACATATATATATATATACATTTACTTCAATAAA	0.160847	0	0
YBR213W:152:102	GATGACTACGGGCAGTAGCATGTAAATGATGGACACACACACACACATAT	-0.755444	139	55
YBR213W:50:0	ACATTGTTCATGAAGTGTGCAAAATAAGAGAGTGTATAATAGGATAAAAA	0.448529	2	3
YBR213W:75:25	AGGCTGTGCCAGACATTTTTGCCATACATTGTTCATGAAGTGTGCAAAAT	-0.346944	328	197
YBR215W:41:0	GAACAGCATTAACCTCCACGACCATATTCAAACGATTGGAA	-0.621913	209	95
YBR216C:33:0	ACCCTAGACATTCAATACGATACTCAGACACTA	0.273631	1180	1321
YBR217W:47:0	GTACATCCCTAACTGTATATTCTACAGTAGAGTGAACCAATGACAGT	-0.879172	115	40
YBR218C:50:0	AGGACAGTTACTAGGAGAGAAAATAAGGGACATAGAGAACAAAATAAAAT	0.160847	0	0
YBR218C:62:12	ATTGCAAAATAAAGGACAGTTACTAGGAGAGAAAATAAGGGACATAGAGA	0.160847	0	0
YBR220C:50:0	TGAGGCAGTATAATATACCATAGTTATAGGGGGATAAAACAAAAGTAGGC	-0.718403	52	21
YBR220C:67:17	AAGACCTAAACGTTTGGTGAGGCAGTATAATATACCATAGTTATAGGGGG	0.160847	0	0
YBR221C:125:75	ATTTAGTATCATTTACACACTCGGACGTTAAATTCCGCCTCCCTCATAAC	0.318717	344	403
YBR221C:175:125	CAGCGACTCTTGATATTATCTCTGTCAAGTTTCTTCCTTTTGTTAGACTA	-0.388658	245	141
YBR221C:203:153	ATCTACATATACAGGTTAACGATTGCAACAGCGACTCTTGATATTATCTC	-0.141724	202	149
YBR221C:50:0	TCGATCGCAGTTTAGTAAGTTCTTTTACTTTTGCAATAATTTTGTTCAAC	0.175392	272	276
YBR221C:75:25	AGTTCCTGTGTTTGTTCATTGATAATCGATCGCAGTTTAGTAAGTTCTTT	0.188571	248	255
YBR222C:27:0	AGACGCTTCACGCACATTTTTGCTACA	0.321773	3991	4688
YBR223C:26:0	GATAATGTGTTTTCAACCGATCATTA	-0.715672	2476	1030
YBR225W:110:60	TAAAGTAGTAGTAATTATTAAAGGACACATATTGAAGGATTGTTCAATTT	0.160847	0	0
YBR225W:135:85	AAGCAGCAGCTACTGGAGAAGTGTGTAAAGTAGTAGTAATTATTAAAGGA	0.160847	0	0
YBR225W:50:0	TATTTTTCCCCTCATTTATCCACTTTTTATAAACTGCTCAAGTAAATACA	0.442798	349	463
YBR225W:75:25	AGGATTGTTCAATTTTCTTTTTTATTATTTTTCCCCTCATTTATCCACTT	-0.299577	747	471
YBR227C:50:0	CATCAAACAAAACCATAGAAGACAAGGCACTCTAATTACATTTCACACTC	0.234954	12	13
YBR227C:58:8	AAACGGCTCATCAAACAAAACCATAGAAGACAAGGCACTCTAATTACATT	0.869742	62	127
YBR229C:7:0	ATGCAAC	-0.366234	17220	10165
YBR230C:38:0	AATTAGAAACATAACATCTACCTCCAGCATCTCATAAT	-0.132376	180	134
YBR230W-A:50:0	ATAAGCAACAAAGGAAAAGGAAACAAGTAAAAAAAAAAAAAGAGACTAGC	0.160847	0	0
YBR230W-A:64:14	GAACGAGAAAGCGGATAAGCAACAAAGGAAAAGGAAACAAGTAAAAAAAA	0.160847	0	0
YBR231C:50:0	CGTAAACTGGAATAATATTGTTTCAAGAAAGAAAACCCACTAGCCTATAA	0.0808038	38	35
YBR231C:57:7	GAAAAGGCGTAAACTGGAATAATATTGTTTCAAGAAAGAAAACCCACTAG	0.359697	49	60
YBR233W-A:19:0	ACGGCGTTGTAGTCACAGT	0.125976	7265	7016
YBR233W:103:53	CCTTTTTCATATTCAAACTTATCCATAGCCACATCCACTCTAACAATTTT	-0.0506742	277	224
YBR233W:128:78	ACCTAGTCGTTAGCCGCATAAGTAACCTTTTTCATATTCAAACTTATCCA	0.295766	89	102
YBR233W:50:0	CGTCCAGCGCGGCATTAAATAATCTTTCTGTAATACTCTTTAGCTCAATT	-0.0498745	299	242
YBR233W:75:25	CCACATCCACTCTAACAATTTTAATCGTCCAGCGCGGCATTAAATAATCT	-0.463514	322	172
YBR234C:46:0	AGGAAAAATAAGCCGAAGTAAACGTATATTAGTTGAGAGTCTCCTA	0.234954	38	41
YBR235W:50:0	TGTTTTTGCCAGCCAATTCTCTTTAAGAATAGGCCTTTCTTGTAGGATTA	-0.601729	327	152
YBR235W:56:6	AGACAGTGTTTTTGCCAGCCAATTCTCTTTAAGAATAGGCCTTTCTTGTA	-0.588144	312	147
YBR235W:81:31	GTGCTTGTTGTCGAAGAAGTGATAGAGACAGTGTTTTTGCCAGCCAATTC	-0.386793	248	143
YBR236C:38:0	AACGTGGAGTCGTCCATTATCCGTCTTAGAAAAGTAGA	-0.0936834	533	413
YBR237W:44:0	GAGAAGGGAAATCATAACGCTGTTGCCTTGGGTTTATTTGAGGT	-0.441329	377	206
YBR239C:125:75	TACTCTCTTAGATAAAATTGCTAGTTATATAAAGTCAGGATACTCTTGAG	-0.248938	115	76
YBR239C:50:0	CAACAGACACACGAAGGTATAAAAATAAAATACATTGATGAATCATCGTG	0.11389	108	103
YBR239C:75:25	CTATTTTTATCATTTCTTTTGGGTACAACAGACACACGAAGGTATAAAAA	0.160847	0	0
YBR241C:125:75	TGAAATGGATTTCCCTTAAAGTTGCTTCCTGATTAAGGGAATAACAGGAG	-0.369782	16	9
YBR241C:175:125	TCGTAGGCGTAATGTAAGGTTGTCCGAGAAAAGATGGGAAGTGTGAGGGA	-0.958385	97	31
YBR241C:202:152	AAACGAACTTGCTTGTGTAGTCATACGTCGTAGGCGTAATGTAAGGTTGT	-1.05589	367	108
YBR241C:227:177	AACGAGCAATGATACGCGGTCTGTAAAACGAACTTGCTTGTGTAGTCATA	-0.978588	99	31
YBR241C:50:0	CTCTTGGAACAACAACAAAACACAGAGACTAAGGCATAACAAACTAAGTC	-0.409698	22	12
YBR241C:75:25	AACAAAAGTTGCTGAATATCTTTCTCTCTTGGAACAACAACAAAACACAG	-0.157607	10	7
YBR242W:125:75	GCCTGAAAATACCCACTGAATGGTTTTTTTCGCAGGAGCAAACCTTTTCC	-0.806967	228	86
YBR242W:168:118	ATCATAATTAGACTGTTTTACTCTGTCCATTGGTCATTATAAAGCCTGAA	0.172681	167	169
YBR242W:50:0	TTTTATTCTCATAAAAAACAATTGTCAAAGAAAGCCTACATAAAAAAAAT	1.41361	5	20
YBR242W:75:25	ATTTCTAATAAACCTTCTGCACTATTTTTATTCTCATAAAAAACAATTGT	-0.282076	203	130
YBR243C:32:0	AAGGCGGAGAACGGTAACAAAAAGTAGACTAT	0.370004	1151	1419
YBR244W:36:0	AAGAATACAATTAGCAACAAAAAGTAATAATTCAAA	0.166817	166	167
YBR246W:43:0	ATTTCTACATCCACCTCTAGCTGGTTTTTGCATAGCTATACAT	-0.0223683	447	372
YBR247C:21:0	ATATTAGAAAGATTAACTATA	0.395847	2313	2926
YBR248C:50:0	GCAGTATCCAGTTTAGGTTTTTTAATTATTTACAAGTAAAGAAAAAGAGA	0.160847	0	0
YBR248C:63:13	AGCTATTGAAGTAGCAGTATCCAGTTTAGGTTTTTTAATTATTTACAAGT	0.732104	121	215
YBR248C:88:38	AATCAGGTTTTAAAAGAAAAGAGGCAGCTATTGAAGTAGCAGTATCCAGT	-0.254097	105	69
YBR249C:50:0	ATTTTATATATTTAACCGCTAAATTTAGTAAACAAAAGAATCTATCAGAA	0.523752	31	45
YBR249C:65:15	TCTTTATATTCGTTTATTTTATATATTTAACCGCTAAATTTAGTAAACAA	0.380706	60	75
YBR249C:90:40	AATTAAGAATAACTAGAAGAGTCTCTCTTTATATTCGTTTATTTTATATA	0.356591	73	89
YBR251W:50:0	GTAGACGGTAAACCATACAAGAAACAGATTTCATAGATCAATAGGTAAAG	0.53554	10	15
YBR251W:68:18	ATCGTTATTGTTGTCAAAGTAGACGGTAAACCATACAAGAAACAGATTTC	-0.021475	47	39
YBR252W:18:0	GAGCCAAAAAATAACCAA	-0.0308284	1868	1542
YBR253W:50:0	ATAACAGATTGTGATGATAGGCATCCTGTACTCCTTTTTTTTACAAGAAA	-0.59744	110	51
YBR253W:61:11	ATGGGCTAATCATAACAGATTGTGATGATAGGCATCCTGTACTCCTTTTT	-1.16293	247	65
YBR254C:8:0	ACATTGAG	-0.118111	10992	8316
YBR255C-A:24:0	AACGACACAAAAACTGCTGCTACT	-0.0576278	3204	2575
YBR255W:23:0	GAGGTACTTTAAACGGATGAAAC	0.00354026	1586	1355
YBR256C:35:0	GTCAAACCAATTGGTGAGATCGTAACCATAGCACA	0.0172281	1337	1158
YBR257W:31:0	AAGCACGATTTGGACTCCCCTATTTGTCAGA	-0.0409556	2259	1846
YBR258C:33:0	ATAAGAGAGTAGAGCTTATTTCAAATCCAAAAA	0.177228	665	676
YBR259W:49:0	AGCAAGCGGTATATGAACTCAGTTTTAAGGTGTAGTTTATTTTATAGTC	-0.021475	209	174
YBR260C:37:0	AATCTCGGAAGATTAAAAGAGAAGTGATATAGACAAG	0.639028	136	220
YBR261C:25:0	AAGAAAGAATACATAAACAACAACG	0.113471	1836	1751
YBR262C:35:0	AGTGGACTAAGAACCAGCAGATAACGGAGAGAATC	-0.300919	410	258
YBR263W:40:0	AAGCCGACATTTCCACATCGAGTCTCATAGTCTTTCAATC	-0.167747	1238	891
YBR264C:38:0	AGGAAATACAAGTAGCACAAAATACGGAGGAATACGAT	-0.0535634	56	45
YBR265W:36:0	AAGAAAAGAAGTTATCGGTATAATCTTTTGTAGGTA	-0.442014	761	416
YBR267W:17:0	ATATCAGTAACAATACG	0.0128904	3620	3122
YBR268W:14:0	GCTGAAGACTGAAG	0.0204557	5725	4975
YBR269C:21:0	AAATAATAAAAAGAAGAACTA	0.408141	359	460
YBR270C:125:75	GCGATCTTTGCGGGCTTTAAAATAAGGTCAAAATTAAAGGGAGAAAGATA	-0.244619	32	21
YBR270C:175:125	ACAAGAGCACTTTATCCATTTTGCATGCGACCTTTACTAGCAATTTTTCA	-1.012	600	185
YBR270C:225:175	CCCAATCCAATATACCACTATACTGCGAATGAAGGTGTTGAAATAATTTG	-0.956814	158	51
YBR270C:275:225	TGCATACGCTACTAGCTTAAACCAATATTGGTGTCGCCTGTTTTCCTTTA	-0.784525	627	243
YBR270C:302:252	GAACCAATTTTAATGCCTGGATAGAGCTGCATACGCTACTAGCTTAAACC	-0.92378	70	23
YBR270C:50:0	CCACAATAAGCATAAGTGGCTAGGCGAGTCTTAAACTACAGAGTCAAGCA	0.272964	58	65
YBR270C:75:25	GAAGACAGTAAATAAAAAATACAAACCACAATAAGCATAAGTGGCTAGGC	0.0316348	32	28
YBR271W:17:0	ATAGCGGATATTTCACT	-0.0779779	4466	3517
YBR272C:27:0	GCAAAAGAACTCAGCGAAACAGGAGCA	0.366663	651	800
YBR273C:31:0	AAGGATAGCTAAACCAAACAGCCGTAACCAA	0.339564	2084	2492
YBR274W:36:0	ATCATAAGTTGCTGTATATGGGCAGCACGTATTACT	-0.649892	1306	580
YBR275C:114:64	GAGGCAATTCGTCGGCATCAGTACCTAAGGAGATAAAAGTGAATATATAT	0.343168	14	17
YBR275C:50:0	ACGTTATTACAGGATTGCCATTGCAAAATCGTTTTTGTGGTCAATTTGCA	-0.181343	420	298
YBR275C:75:25	TGAATATATATATATATATTCGTCAACGTTATTACAGGATTGCCATTGCA	0.0684732	33	30
YBR276C:50:0	GATTGTCATTGAGGTAGAAGGGGCGGGTATAGAAAACTAGAGCAACAACC	-0.829552	139	51
YBR276C:70:20	AACACCAACCATAAAAGAGAGATTGTCATTGAGGTAGAAGGGGCGGGTAT	-1.0354	128	38
YBR276C:95:45	AAGAAGAAGTAAAAAAGTGAAAAGAAACACCAACCATAAAAGAGAGATTG	0.160847	0	0
YBR278W:18:0	AACCGTGTTGCAAAAAAA	0.192067	2364	2439
YBR279W:28:0	AGTGCTCATAATAGTATAAAGGGTCACA	0.28969	1068	1215
YBR280C:3:0	ATC	0.0656627	15033	13668
YBR281C:49:0	AACCCTGTAAGGAAAAGTGAAAAACGAGGGCAGAAGTAATTGTGAAATC	-0.0578427	55	44
YBR282W:39:0	CAAAGATTACCTTGAAAGTGAGGACAGCAAATAACTAAA	-1.83158	43	5
YBR283C:125:75	AAAAGCTTGCTCTTTTTTTTTTCTTTGCTTGGGTTGGGTGGTTTTTCATA	-0.518401	642	325
YBR283C:153:103	AATAAAAGTAAGATCGAATACACTGCAGAAAAGCTTGCTCTTTTTTTTTT	-0.360691	218	129
YBR283C:50:0	CGTACGCATTTTTTAGCACATTTGCCCCCGCCACTCTCCATTGTTTTAGT	-0.297288	1071	677
YBR283C:75:25	GCTTTATTGAATTGAATCCATTACTCGTACGCATTTTTTAGCACATTTGC	-0.783615	359	139
YBR284W:12:0	ATCACACAAACA	0.369482	6456	7954
YBR285W:125:75	ATTTATTTTTTTTTTTACATATCTTAATTTAATATAAATCAAAAAGCCCA	0.660802	36	60
YBR285W:158:108	AGTAGATACTGTAAATAGAACACACGTTTTTTAATTTATTTTTTTTTTTA	0.314997	17	20
YBR285W:183:133	AATGGAATATATAAACAAATAAGTAAGTAGATACTGTAAATAGAACACAC	-0.783615	17	6
YBR285W:50:0	CCATTTATAACATAACAATTCGAAATCTCTAAGCTCGCTTATAGTTGACA	-0.372671	103	60
YBR285W:75:25	AGCCTCAAACAAGAGTCTTATCACTCCATTTATAACATAACAATTCGAAA	0.424998	42	55
YBR286W:13:0	AGAAACGCCAACC	0.518069	8768	12533
YBR287W:33:0	ATACCCTCATAGATTACTCTGCATTTCTACTAT	0.0443325	2263	2014
YBR288C:50:0	GACTTGGGCAACAACAGAGGCTGTAAACCTTACCAACCCAACCAAAATAG	-0.613646	255	117
YBR288C:58:8	GATAACAGGACTTGGGCAACAACAGAGGCTGTAAACCTTACCAACCCAAC	-0.234036	140	94
YBR289W:29:0	ATATAGTAAAGAACTACACAAAAGCAACA	0.788036	328	615
YBR290W:7:0	AAGCGCT	-0.267723	13922	9069
YBR291C:36:0	AAAGTAGAGCTTGAATTATAAATTAGCATTTTACCG	0.229196	310	332
YBR295W:17:0	CAAAGCTGCTGATAACG	-0.21216	4576	3151
YBR296C:50:0	AATACTGGAGCGTATCTAATCGAATCAATATAAACAAAGATTAAGCAAAA	0.742768	18	33
YBR296C:66:16	ATAGATCAAAGGTGAGAATACTGGAGCGTATCTAATCGAATCAATATAAA	0.160847	0	0
YBR297W:39:0	ATCGAACGAGAGCATCTTGAAGATATTTATGTTCTAAAT	0.263626	387	429
YBR298C-A:125:75	GTTCTGTTTCTGGATGATCAGAAATAGTCATTTATGTATTTTAGTTACGC	-0.532301	153	76
YBR298C-A:169:119	TGCTGGGTAAATTTGATAGATTGTGGCCTCTTTCCACCACTTTGGTTCTG	-1.00676	764	237
YBR298C-A:194:144	CATCGTTATTGGAGTCTTTAAAACTTGCTGGGTAAATTTGATAGATTGTG	-0.587651	259	122
YBR298C-A:50:0	CAAAAAAACTGCTTAAGAGATAGATGGTTTAATTTTTTAGAGACGTATTA	-0.893314	65	22
YBR298C-A:75:25	TTGACTGATGTACATTTGAGATTATCAAAAAAACTGCTTAAGAGATAGAT	-0.175626	13	9
YBR299W:125:75_YGR292W:125:75	GGCGCTCTGGGCAAGGTATAAAAAGTTCCATTAATACGTCTCTAAAAAAT	-0.346748	102	61
YBR299W:175:125	TAAGATGAGTAGTTCCTTCCTCAATTCTTCTTTCAGCATCATTTTCTTGA	-0.908049	430	147
YBR299W:210:160	AACATGATTTGGATCGTGGGATGATACAAACAACGTAAGATGAGTAGTTC	-0.578821	131	62
YBR299W:50:0	TTTTTGATAATCTCAAATGTACATCAGTCAAGCGTAACTAAAATACATAA	0.205298	21	22
YBR299W:75:25	TAAACCATCTATCTCTTAAGCAGTTTTTTTGATAATCTCAAATGTACATC	-0.584669	195	92
YCL001W:19:0	ATCAAAAAAAGGAAGCAAG	0.601643	2344	3643
YCL002C:27:0	GCGAAGCAATTATATTGAATCATTCAC	0.0154483	2312	1999
YCL004W:50:0	ACCCAGCTTGTCCATAATTGCTAATAGCATACTCAGGATAACATATATTA	-0.340633	70	42
YCL004W:55:5	AGGACACCCAGCTTGTCCATAATTGCTAATAGCATACTCAGGATAACATA	-0.517912	68	34
YCL004W:80:30	CCACACAAGAAAGTAGATATAATGTAGGACACCCAGCTTGTCCATAATTG	0.160847	0	0
YCL005W-A:25:0	AACGAATAATAAAGAACAAAGAGTA	0.219037	483	512
YCL005W:46:0	ATCAGCAACTGTAGGAGGAGAAAGCAGGTATATAACTAGCCGCAAT	0.217709	187	198
YCL008C:4:0	AACG	-0.106619	13873	10617
YCL009C:46:0	ATACAGAATCTTTAGAACATCTGAGCTCACTAACCCAGTCTTTCTA	0.208703	203	213
YCL010C:20:0	ACACGGTCACCTTTCTTATT	0.118455	7492	7181
YCL011C:44:0	ATGGGCGAAAAGGAAACAAACATCAGCTGGATTTTTTCGCCAAG	-0.465461	216	115
YCL012C:34:0	ACACAATTAATTTCCAAAAATTGCAAATACGAGT	-0.102329	1356	1042
YCL014W:103:53	AACACTAGTTTGTCTGTACTCGCATTCTACTGCTGCTACCTGCTACTCAT	-0.761487	248	98
YCL014W:50:0	GTGTTCGGGCTGTTATCTGGTTGCTAAAAGAGTATATTTACACCTCACCA	-0.180985	448	318
YCL014W:75:25	ACTGCTGCTACCTGCTACTCATTACGTGTTCGGGCTGTTATCTGGTTGCT	-0.832657	793	293
YCL016C:32:0	ACCAGAGATTTGCTCACTAATAATCCTGTACC	0.18572	1349	1383
YCL017C:115:65	AACTCACTCAGAGTAAAGACCGACAGAGTTCATTAGTGTGTTATATTTTC	0.0665358	99	90
YCL017C:50:0	ATTTTCATTAAAATATATCGCATACACGAAGGAACTGCTACAACTGGAAG	0.334693	78	93
YCL017C:75:25	TTATATTTTCTATTTCAGATACATCATTTTCATTAAAATATATCGCATAC	-0.244619	11	7
YCL024W:50:0	TGTATAGGCTTGATAATAGTGCTGACGTAAATTACCAGAACTACTGCAGT	-0.161441	97	70
YCL024W:72:22	ATAATAGAGTGTGCAATAAACGTGTATAGGCTTGATAATAGTGCTGACGT	0.195938	27	28
YCL025C:31:0	ACGCTAATATAGACAAAGATAGCTTCGCACA	0.403979	1158	1477
YCL026C-A:102:52	CCATGTTGTGATCGAAGAGAGATATAAAGGTTGATCATTTTTGGTTTTTT	-0.760648	577	229
YCL026C-A:50:0	AGCTATATACACCATCAAAATCAAGAACACCAGACCTCCAAGCCAAAGAA	0.748633	24	44
YCL026C-A:75:25	AGGTTGATCATTTTTGGTTTTTTAAAGCTATATACACCATCAAAATCAAG	0.277571	104	117
YCL026C-B:50:0	AGACTGAAGTATCCTATATCAACATATATACAAAAAAACAATCCAATATC	-0.615682	49	22
YCL026C-B:74:24	CTACATAATTTGTACTTTTTTCGTAGACTGAAGTATCCTATATCAACATA	0.335406	193	230
YCL026C-B:99:49	AAGGACACCATACTGAAGGAACTGACTACATAATTTGTACTTTTTTCGTA	0.466612	273	371
YCL027W:28:0	ATAAGCCATCAAGTTTCTGAAAATCAAA	0.456785	783	1053
YCL028W:32:0	ATAGCGATACAAACGTATAGCAAAGATCTGAA	0.475005	996	1364
YCL029C:50:0	AAGGTAAAAGGCGTTGAGCTGTGGCTGGCTGTGTATGCGTTTGAAATACC	-0.561776	240	116
YCL029C:60:10	ATCAAAGGACAAGGTAAAAGGCGTTGAGCTGTGGCTGGCTGTGTATGCGT	-0.803072	429	163
YCL030C:50:0	TGCGCTGTGTAATAGTAATACAATAGTTTACAAAATTTTTTTTCTGAATA	-0.345423	72	43
YCL030C:60:10	ATAGCACAACTGCGCTGTGTAATAGTAATACAATAGTTTACAAAATTTTT	0.63085	9	15
YCL031C:50:0	GGGCGAACGAACTAGGTAACAGATAACAACCTCAGATAGAGTGTTACGGG	-0.101518	77	59
YCL032W:50:0	TCGAAGGACTCGAAAAGACAGAGGTCGTACTAGCAGAGATAGCAAATCAG	0.789455	31	59
YCL032W:52:2	GGTCGAAGGACTCGAAAAGACAGAGGTCGTACTAGCAGAGATAGCAAATC	-0.414518	31	17
YCL032W:77:27	ATCGCTAATTATAACAAAGAAGCTAGGTCGAAGGACTCGAAAAGACAGAG	0.469148	35	48
YCL034W:24:0	ATTGGAGGCAGGCAAAACAAGAAC	0.449306	2248	3000
YCL035C:50:0	CGAGCATTCGCATAATTATACAAATAGACAAAACCTCAGAAGGAAAAAAA	-0.021475	17	14
YCL035C:64:14	GTGCAGTACTTATACGAGCATTCGCATAATTATACAAATAGACAAAACCT	-0.361675	85	50
YCL036W:50:0	AGGAAAGGAGGCAATGAGAACTTGGGTCTTGCTCGAGAGTCCAGATCCAC	-1.03336	712	215
YCL036W:54:4	AAGAAGGAAAGGAGGCAATGAGAACTTGGGTCTTGCTCGAGAGTCCAGAT	-0.912448	116	39
YCL037C:50:0	ACTCTGGACCTGCTAACGTGTTTCATCTTCTTTTCACTTCTCTGCCCACG	-0.477502	1366	721
YCL037C:67:17	AATAGAACATCAGGATTACTCTGGACCTGCTAACGTGTTTCATCTTCTTT	-0.73835	434	176
YCL038C:50:0	TTTGCCCTTATAAGCAATAGTTTGCTCATAACATATTCTCTACATTAGAT	0.310965	141	164
YCL038C:56:6	ACGGTTTTTGCCCTTATAAGCAATAGTTTGCTCATAACATATTCTCTACA	0.129814	359	348
YCL039W:20:0	GTACTACTTCAACTAATAAA	0.420141	1580	2048
YCL040W:29:0	ACCACTAATACAACTCTATCATACACAAG	0.249579	1982	2166
YCL042W:125:75	GCCCGACAGGGTAACATATTATCACGTGCAGCCCAGGATAATTTTCAGGA	0.56012	323	482
YCL042W:154:104	TAGTGAGAGAAAAGGGAAAAAGAGGCGCCGCCCGACAGGGTAACATATTA	0.160847	0	0
YCL042W:179:129	ACGGTGGCAAATTGGAAAAAGAGACTAGTGAGAGAAAAGGGAAAAAGAGG	0.160847	0	0
YCL042W:50:0	CCGAAAAAATCAAAAAAAACAAAAAACGGGAAATAACAATAACGACAAAA	0.160847	0	0
YCL042W:75:25	CACGTGTTTCGAAAGGTTTGTCGCTCCGAAAAAATCAAAAAAAACAAAAA	-0.18746	16	11
YCL043C:37:0	AAGCTCTACATAAAGAAAAACATACATCTATCCCGTT	0.534634	758	1102
YCL044C:41:0	CTCCTCCATTCCCTCTCCTTTTCCAATTACCGTAATAAAAG	0.0886502	401	373
YCL045C:40:0	ATTCATATCAACACTTTCATCCTCCCCTTCCCCCATAGCA	-0.386229	1366	790
YCL047C:20:0	ACGTGCACTAGCAGACTAAT	0.351837	3349	4054
YCL049C:50:0	ATTGCAATTCCAGGGTTCAAGAGAGAAAAATCTGTAATCACTTCGAACCA	0.218005	84	89
YCL049C:55:5	AAGCTATTGCAATTCCAGGGTTCAAGAGAGAAAAATCTGTAATCACTTCG	-0.448919	45	24
YCL050C:50:0	CAGTTTAGATAGATTTTAGAACAAACAGAAAAGTAAAAATTAAAATAAAA	0.160847	0	0
YCL050C:62:12	GATCTTGAAAGCCAGTTTAGATAGATTTTAGAACAAACAGAAAAGTAAAA	0.703171	24	42
YCL051W:125:75	CCACTAAAACTTACCTGCATTTGTCTACTTAAAGATACATTCCAACTATT	0.444734	791	1051
YCL051W:175:125	GGAGCTCTTTTCGTGTTTTGCACTAAGAGCATACTGTTAATCCGCAAAGG	-0.503727	413	212
YCL051W:225:175	TCCCCTTCTACGTGTATTGTTCCTCCGTGGTCGATTGTGTTCAAAGATTG	-0.167911	438	315
YCL051W:256:206	CCAATACTCTTGCACGACAAAGTTTTAGTTATCCCCTTCTACGTGTATTG	0.297298	341	391
YCL051W:281:231	CAAAGTTCTGCTGTTAGTGTGTCCTCCAATACTCTTGCACGACAAAGTTT	-0.157607	329	239
YCL051W:50:0	GCATTCTGAACCCTCGGCAATTATTTCATACTCCTTCTCAGAATAGGAAA	-0.231373	224	151
YCL051W:75:25	TACATTCATTTTTATTTCTAAAAGAGCATTCTGAACCCTCGGCAATTATT	0.00501657	297	254
YCL052C:33:0	TAAACGCAAGAAGTGTGCGTTTCTAGCTGAGTA	-0.158249	2532	1840
YCL054W:17:0	AGAGGTGATTGGCAAAA	0.296491	1417	1623
YCL055W:6:0	ATTAAG	-0.056045	6656	5358
YCL056C:31:0	TAAAAGTAAAGGAAGAAGAAAAGAAAGTTGA	-0.206878	51	35
YCL057C-A:27:0	TAAACACGGAAAAAGACAAAATATACC	0.363421	667	817
YCL058W-A:22:0	AAGGGCATTTAGCAAGGAAAAA	0.0899213	1109	1033
YCL059C:25:0	ACACAAATATCCAAATTGGCAAACG	0.309614	1489	1728
YCL061C:48:0	AAGGAAGTTCGTTATTCGCTTTTGAACTTATCACCAAATATTTTAGTG	0.124479	195	188
YCL063W:16:0	AAGGACACATCGATTA	0.315183	3073	3586
YCL064C:10:0	AACCAGCGAG	0.037659	17091	15110
YCR002C:45:0	AAGGCCAAGCCCCACGGTTACTACAAGCACTCTATAAATATATTA	0.257839	107	118
YCR003W:22:0	AGGGAATATCAGCAAACAAACT	0.388223	1272	1597
YCR004C:125:75	GAAGTTTGTAAACTTTATCAGAAAGAAAACAAGAAGAGGAAAAAGGAAAA	0.160847	46	46
YCR004C:165:115	ACATCCTACATTTTTACTTGTTTTACGTTCATTTTTATTTGAAGTTTGTA	0.348505	217	262
YCR004C:190:140	ATTCCGGCAGCTAGTTGATACTATAACATCCTACATTTTTACTTGTTTTA	0.474237	431	590
YCR004C:50:0	AAAAAAGAGAGTAAACAAAACAATACAGACTCAATTGAAGCACTATAAGA	0.810191	34	66
YCR004C:75:25	GAGGGGTCAGGTTAGTATCAATAAAAAAAAAGAGAGTAAACAAAACAATA	0.489351	17	24
YCR005C:50:0	ATAACAGGTTCTCAAAACTTTTTGTTTTAATAATACTAGTAACAAGAAAA	0.458098	25	34
YCR005C:60:10	AACACATATCATAACAGGTTCTCAAAACTTTTTGTTTTAATAATACTAGT	0.160847	0	0
YCR008W:125:75	AACCTTTTTTTACTCTCCATTTACCGCTAGATATTAACTAGTAGTAAGTA	0.258827	135	149
YCR008W:175:125	TACAAATAAAAACTGGAAAGCTTAAGGTAGCTTTCTAATATTAGGCTCTC	-0.244619	41	27
YCR008W:225:175	TTCAAAGTCCTGTTCAATAAGTTGTACTAAGCCTTTAAGCGTTTTTAAGT	0.786983	323	605
YCR008W:275:225	TTGCTGGGTTGTTGTTATTCACTTTAACATTATCGAATAAAATTTGGACT	0.106038	74	70
YCR008W:325:275	ATTTCCTGTCGGTTTCGTTATAACCTGTTGTGTTGTTGTTGTTGTTGTTA	-0.704913	1311	551
YCR008W:375:325	TACTTGGAGTTTCGATTTTAAGAATTTTTTATCATTTTTTTTTTTTGACG	-0.415197	490	275
YCR008W:425:375	ATTCGGCAATTTTTTTTAGCAAAAGTTTATTAAACCCTAATATAGACCTT	0.180649	99	101
YCR008W:463:413	GAGGAAACGGAGAAGAAAATATACTACTTTATAGAGATATTCGGCAATTT	0.246004	89	97
YCR008W:50:0	AAAAAAAAGTAATCAGATTTTATTTTATTTCGACATTACCCCTCAAATAT	0.471001	54	74
YCR008W:75:25	TTGTGACTACTATTCCCTGTAATCAAAAAAAAAGTAATCAGATTTTATTT	0.160847	33	33
YCR009C:50:0	GAAAACTATACAAATCCTATTATAAGAAGCCAGAAGAAAGCTGATACAAG	0.160847	0	0
YCR009C:56:6	GATATAGAAAACTATACAAATCCTATTATAAGAAGCCAGAAGAAAGCTGA	0.661622	19	32
YCR009C:81:31	GTGAGAGAAGAAAAGGAAACGCTGTGATATAGAAAACTATACAAATCCTA	0.160847	24	24
YCR011C:125:75	CGTCTTGAGTTGAAGTCAGGAATCTAAAATAAAAATTAAGGTTAATAAAA	0.0356834	16	14
YCR011C:50:0	ATTTACAGAAACTTGCACACTAAAAATACACAACTAAAAGCAATTACAGT	0.160847	0	0
YCR011C:75:25	AGAGGAAAGAAAAAAAAATTAATCGATTTACAGAAACTTGCACACTAAAA	0.884765	31	65
YCR012W:40:0	AAGGAAGTAATTATCTACTTTTTACAACAAATATAAAACA	0.853994	23	47
YCR015C:24:0	AACCAGAAGCGAACAGTGGAGGAT	-0.419738	2517	1408
YCR016W:26:0	AGAAGAAACATTCACTTCACAATTAA	0.418947	2512	3252
YCR017C:29:0	AGGAATACAGAAGGTATCCACCGCCAGTT	0.381615	1938	2417
YCR019W:101:51	CTTTCATCCCTTCTATTATTGCATAACCTGGCTATACATGAAAACACTTC	-0.51112	326	166
YCR019W:126:76	GCATATTAAACAGGCGCGACTAAAGCTTTCATCCCTTCTATTATTGCATA	-0.120164	248	187
YCR019W:50:0	CACATTTGATTTAAGAAGTTTACTGTTCTAAGAAAATAAAGAACGTGATA	0.597564	41	64
YCR019W:75:25	CCTGGCTATACATGAAAACACTTCTCACATTTGATTTAAGAAGTTTACTG	0.645355	76	124
YCR020C-A:18:0	AAGGGGCACCAAAGCGTC	0.00759062	4095	3513
YCR020W-B:10:0	AGTATATCGT	-0.23614	9042	6079
YCR021C:50:0	CAAGTTTGAGACTTTAATATCTTTTGATTACTAAAAACAACAAATTTCAA	0.617084	63	100
YCR021C:75:25	ATTTATAATTACAAAAACAAAACAACAAGTTTGAGACTTTAATATCTTTT	0.160847	45	45
YCR023C:50:0	GCAAAGGAACTAGGAAGTGGTAAGCATATGAACACACGAATATAAAAGAT	-0.167658	24	17
YCR023C:65:15	CCTAAAGGAATGCTAGCAAAGGAACTAGGAAGTGGTAAGCATATGAACAC	-0.448919	45	24
YCR023C:90:40	ATCCACAGAGCTTGAATTTAGATCACCTAAAGGAATGCTAGCAAAGGAAC	-0.18746	16	11
YCR024C-A:125:75	TAAGTTAACTTTTTCATCTCTTTTTTTTTCTCAACTTCAAACTAGTCACT	-0.438405	192	105
YCR024C-A:166:116	TATTTAAAGGAAGACGCTACACACTTTGAAGGAAGAGCAAATAAGTTAAC	0.00224148	74	63
YCR024C-A:191:141	ATTTATTCTTTTTCCCTTTCAATAGTATTTAAAGGAAGACGCTACACACT	0.271456	170	190
YCR024C-A:50:0	CCTTTGTTTGTTTCTCCTCTTCCCATTTCAGCACTTTTAATCTATCATAA	-0.171007	431	309
YCR024C-A:75:25	CAAGCAAACTTTTGTTCCTACATATCCTTTGTTTGTTTCTCCTCTTCCCA	0.11338	905	863
YCR026C:50:0	GAGGTAATTACATATATCTGAAAAGAGGTACAGTATAACACTCTCTATAG	0.513668	51	73
YCR026C:74:24	ACAAATAAGCAAAATAAGTGAGGCGAGGTAATTACATATATCTGAAAAGA	0.160847	0	0
YCR027C:125:75	TTGCCTCCATTTTCATTGACGCATATTGATATTTTCATATTCATTCTTTT	-0.590437	300	141
YCR027C:175:125	AGCAGTTACACGAATTATTACTAGTTATATTTCCAGTGAAATTATTGAAC	1.77028	2	14
YCR027C:50:0	CGAAACAGTTTTATTGGGGCACGGCGAGAAAAGATATAACCTGTGACATA	-0.244619	74	49
YCR027C:75:25	GGGCTGGTTCGAATTGTCTCTTTACCGAAACAGTTTTATTGGGGCACGGC	-0.556607	1165	568
YCR028C-A:40:0	GACAAATACAAAACAAACAAAAATCCACTAATCCATTGTA	0.481105	150	207
YCR028C:118:68	ATCGGCTCTTAAGAGAAATGAGGCGGACCTGTAATTCTGATATAAAAGTA	-1.57375	16	2
YCR028C:50:0	TGAGAAGCTGTTTTCAGAATTTTTGATTGGAGAGAGCCTGGGCCTAAGTC	-0.605276	610	283
YCR028C:75:25	AAAAGTATTCCGATTTATTCAAGATTGAGAAGCTGTTTTCAGAATTTTTG	0.167581	147	148
YCR030C:50:0	GTAGTCGTATTGAAGCAAGCTTATTTGAAAATTGCGAATAATCACCTCTC	0.0561759	160	144
YCR030C:59:9	ACTTTTGCTGTAGTCGTATTGAAGCAAGCTTATTTGAAAATTGCGAATAA	0.0808038	116	107
YCR031C:41:0	ATTTTAAACCCAAGGAGAGTAAGAAACCACAAGAACCCGCC	0.553101	126	187
YCR032W:104:54	ACCCAAATAAATCATTTGAAGAACTCATAAAAGGACTATAGCAGCAAGAA	0.160847	0	0
YCR032W:129:79	GTTGATGTGATTACTGATTCAACTGACCCAAATAAATCATTTGAAGAACT	-0.118738	81	61
YCR032W:50:0	AAGCCAATTGGTTCTTTCTCCTTTCTGCCAAAAAAAAACACAATACGGAT	-0.116364	189	143
YCR032W:75:25	AAAGGACTATAGCAGCAAGAACTGCAAGCCAATTGGTTCTTTCTCCTTTC	-0.466389	454	242
YCR033W:125:75	GTCATATTGCTCGAATCCTTAACAAGCAAAATATACAACCACTAAATTAT	0.371411	63	78
YCR033W:175:125	ACCACCTTCAAATTTACTCATTGTTTAAGACAGGCAGTGGGAAAGAAGCC	0.304832	225	260
YCR033W:50:0	GCCTACTAACTTGTGCATAGAACAGCAAACAGAAACAAAGCGTAAGAAAC	0.63085	4	7
YCR033W:75:25	TCCGAAAGGGCCTGCTTAATAATTTGCCTACTAACTTGTGCATAGAACAG	0.0297335	235	206
YCR034W:26:0	GAACTAATTATCTTCGTCTAGAAGCC	0.132649	2157	2097
YCR035C:10:0	AATATTGGAA	-0.219707	6005	4104
YCR036W:17:0	AACAGCATATTTCAAAG	0.355643	3119	3790
YCR037C:31:0	ACGGTAAAGGCGGCTATTATTGTGCCTCGAA	-0.354116	2583	1543
YCR042C:23:0	AACAGGATAAATAGGTGGACTTC	-0.341266	2094	1267
YCR043C:24:0	GCTCTTAACGTACTTTGGCAAAGG	0.00306607	3541	3024
YCR044C:18:0	AGAAGTGTGGCAAGAAAT	0.619475	2563	4055
YCR046C:6:0	ATAGCG	-0.308669	9831	6147
YCR047C:50:0	GCTAAAAAGGTGCGGTACGGAAACACAGGAAATATATCAGAGAAGAAATA	0.096308	15	14
YCR047C:64:14	AGTAAAAAAGTAGTGCTAAAAAGGTGCGGTACGGAAACACAGGAAATATA	0.160847	0	0
YCR047C:89:39	AGAAGAAGCAGAAGAAGAAGAGCATAGTAAAAAAGTAGTGCTAAAAAGGT	0.160847	0	0
YCR048W:44:0	GTTCAGCACGGCTTGCAGCAAGAGCGCCAAAACAGATTGCAAGA	0.393178	194	245
YCR051W:24:0	GATTATAGGTGTTGTGACGACAAA	0.00746625	1729	1483
YCR052W:35:0	GTATAGTAATACAGCACGAAAAACAGCTCATAGAA	0.242427	199	216
YCR053W:41:0	AGCAAATATTTGTTCTTAGACGGCCACCATCCCTCACACCA	-0.0523655	525	424
YCR054C:50:0	AAGCCTTATAAAATTATTGATTCATCAAAAAAGAAGATAACTAAATAACA	0.971777	7	17
YCR054C:53:3	ACTAAGCCTTATAAAATTATTGATTCATCAAAAAAGAAGATAACTAAATA	0.160847	0	0
YCR054C:78:28	ATACTATCATCGGGAGAACAATTACACTAAGCCTTATAAAATTATTGATT	0.583119	235	359
YCR057C:50:0	GTTTTCAACAGGTAGACAGGAGAGCAGACCGCAGATTGAACCGCATCCCA	-0.46529	201	107
YCR057C:62:12	AATAATAGTATCGTTTTCAACAGGTAGACAGGAGAGCAGACCGCAGATTG	-1.26054	28	6
YCR059C:17:0	GAGGAAAGAAAAGCTCA	-0.368876	2207	1299
YCR060W:13:0	AACGGTAAAGAGC	-0.0466984	4070	3307
YCR061W:50:0	TTTTGCATTGTACTCTTAATACCCCAACCAAAAACAAAATAGTGAGAGTA	0.160847	0	0
YCR061W:58:8	AGTATTTGTTTTGCATTGTACTCTTAATACCCCAACCAAAAACAAAATAG	0.160847	7	7
YCR063W:38:0	AGCCGTCAAGACTAGCAAAGCTCACCTCACAAAACGAC	0.163219	420	421
YCR065W:50:0	CTTATTTCGAAGCAAAAAAAAAAAAAATCAACAAAAATTCCAACTTTTCA	0.766982	11	21
YCR065W:54:4	ACCTCTTATTTCGAAGCAAAAAAAAAAAAAATCAACAAAAATTCCAACTT	0.160847	0	0
YCR066W:50:0	ATCCGCAAGTGAGCATCACAGCTACTAAGAAAAGGCCATTTTTACTACTC	0.419028	257	333
YCR067C:107:57	GCTTCGATCGACGGAGGCTGTTTGTCAACAAGCATCACAATTCCCTACGA	-0.254298	570	376
YCR067C:50:0	TCTCTTCCTTTTTTTTCTCTCCTTTTAAACTTAGAAAAACTAGCATAATA	-0.251398	73	48
YCR067C:75:25	CATCACAATTCCCTACGATACGTCCTCTCTTCCTTTTTTTTCTCTCCTTT	-0.38223	1648	957
YCR068W:106:56	TTTGGATAAGTCAAAGAAAGTACGCCGCTGCTCAGAAAATTGTTATCGTG	-0.263311	161	105
YCR068W:131:81	GAGACACTCAAATCAGTGTCAACCTTTTGGATAAGTCAAAGAAAGTACGC	-0.298228	181	114
YCR068W:50:0	AACTGATCTAGGCATTACAATTAAAGGAAACAAGGGAAATATTCTATTGA	0.184944	40	41
YCR068W:75:25	TCAGAAAATTGTTATCGTGATTGAGAACTGATCTAGGCATTACAATTAAA	0.355003	69	84
YCR069W:122:72	CAGTCAGGTGCAATTAATAGGTCACATATTCTTTGCTTCAATTGCTCTCT	-0.56811	397	191
YCR069W:147:97	AATACTGCTTTAAAGTGAAAGGCGTCAGTCAGGTGCAATTAATAGGTCAC	-0.155615	187	136
YCR069W:50:0	TTGGAAGACCGAAGAAAATAGATAGACTTTCGAATAAGTTCAGCAACAAC	-0.213847	15	10
YCR069W:75:25	TCTAGCAAACTCACACACTCGTAGATTGGAAGACCGAAGAAAATAGATAG	0.160847	0	0
YCR071C:45:0	GTTTACCTAAAGCAACTTACTCCAAGGTAGCGTGTGAGCAAAACT	0.0918536	239	223
YCR072C:26:0	TAAACACACACTAACACAATATACAG	0.648816	592	965
YCR073C:50:0	ATGTTGTTTTACTTAGGGTGGCTATAAAAGGTAGTTCCTTGTAGGTGAAA	-0.964505	378	122
YCR073C:65:15	GAGGATGCTAAGCTAATGTTGTTTTACTTAGGGTGGCTATAAAAGGTAGT	-0.575891	210	100
YCR073W-A:37:0	ATGGACTAGAACAGAAAGCAATTTGCAGCAAGACAAT	-0.246036	705	469
YCR075C:21:0	CAAAAGCAAACGCGAAGCAAA	0.43646	1833	2415
YCR077C:33:0	AACCGGAAGTAAGAGCAGCAAGAAGCACTAGCA	0.373973	601	744
YCR079W:6:0	AATTTG	-0.411969	9360	5278
YCR082W:30:0	ACTAGCGTGTACCAGTCTATTTAAACTGGA	-0.0385695	884	724
YCR083W:35:0	AGGATTGGTTAGTACATAGAGAAACCAAAGCTGTT	0.376879	874	1085
YCR084C:125:75	CTGCAATTGTTTAATTTTCTTTCACGCCAAGTTACCTTTCGCACACCACT	-0.566844	912	440
YCR084C:175:125	TCAGCGAAGCAAGAACAACTGGCTGAACACGTGCCCCTCTATCTGTCCTT	-0.483511	199	104
YCR084C:225:175	AAGTAAACAAATAGAGAGAAATTCCCCCATCTACCCCCAATTGATAAACA	0.699843	27	47
YCR084C:50:0	TTTTTTGATAAGCAGGGGAAGAAAGAAATCAGCTTTCCATCCAAACCAAT	0.160847	0	0
YCR084C:75:25	ACTCTTTTTCTATTGTTTTTTTGTCTTTTTTGATAAGCAGGGGAAGAAAG	-0.467762	74	39
YCR086W:44:0	AATAAAAAAAAGAAAGCGAAACAAGACAATCCAACGTGCGCAAA	1.77028	2	14
YCR087C-A:36:0	AAACGGTCTCAGTCAAGAAATATTTGTTATTACAGG	0.530453	775	1122
YCR088W:38:0	AACCGCACGTATATACACGCACACACCTATCAATCACA	-0.00484758	333	282
YCR089W:125:75	AGATATATAAAGCTGAATTAAATTCAGTACAATGGAAGTTTCCACGTCTT	-1.03039	259	78
YCR089W:175:125	AAGCTACAATGGAACGTTAAGATTAAGAAATGCATGAAGAGTCTCCCAGT	-0.438775	50	27
YCR089W:225:175	ATTTCGGATTTACTTCTAGTCTATGTATAGATTTGTTAGAGACCAGTTTT	-0.467762	104	55
YCR089W:271:221	TGTTTACCAGAAGTGTATGGTACATGGTGCTTTCCTTATGCTCACTATTT	-0.869815	383	136
YCR089W:296:246	AATGCTGTTTTAGAATCGCATCAGGTGTTTACCAGAAGTGTATGGTACAT	0.0584845	184	166
YCR089W:50:0	AGGAAAAGCACACTACAAAAATACGCTATCATCTACCGAATATAACTGCA	0.00178182	33	28
YCR089W:75:25	TCTGTATTTTCATACCTTTAATTATAGGAAAAGCACACTACAAAAATACG	0.294378	97	111
YCR090C:28:0	AATAAAGAAAACCAGGTTGTGTACGATA	-0.168457	972	699
YCR092C:36:0	GCAAATAGATTTATTTTGTTGAATCTATTAACAATA	0.423695	1110	1444
YCR093W:30:0	GAGAAACGTCACTCAGGGACAATTGATTAC	-0.03204	1236	1019
YCR094W:50:0	CAAAGAATAATTGAGTAATCGAACTTGAAGTTCTATAGAACAGCTTGTAT	-0.062297	34	27
YCR094W:63:13	GACGCACTGCGAACAAAGAATAATTGAGTAATCGAACTTGAAGTTCTATA	-0.418972	24	13
YCR095C:38:0	ACTTACAGCACTGGTGCGATCCATAACCTGAATTCATA	0.469148	35	48
YCR095W-A:113:63	GATAGCACTAAAAGTAAAGATTTTCCCCGTGTCCTGACTTGGAGAAACAA	0.0628661	74	67
YCR095W-A:138:88	GGGGCTAAAGAACTGTATATTTATGGATAGCACTAAAAGTAAAGATTTTC	-0.860805	24	8
YCR095W-A:50:0	TAAAAAACTTTTAAAATATGATATTCAAAGCTTGAGCATTGGGCTTCTGG	-1.0454	146	43
YCR095W-A:75:25	TTGGAGAAACAAAATTTCATTGTCATAAAAAACTTTTAAAATATGATATT	-0.675402	29	12
YCR096C:117:67	GATATATTAGGATTCTTATCTAGGGCCAACAAAAACCGTAAGATTAGTGA	-0.0494489	115	93
YCR096C:142:92	AACAGAAGAAGAAGTTGAATTAAGGGATATATTAGGATTCTTATCTAGGG	0.106779	37	35
YCR096C:50:0	TGCAAACAACATCTCAACTCACTACTACCATTACTGTATTACTCAAAGAA	0.412161	6	8
YCR096C:75:25	ATTAGTGATGAGGAGAAGAAGTTGTTGCAAACAACATCTCAACTCACTAC	-0.366508	60	35
YCR097W:12:0	AAGAAGGACAAC	0.216665	3483	3683
YCR102C:50:0	ACGACAATTACATATAACCTACAAACAGGCAAGTTGCAATTCCAGAAACC	0.320274	80	94
YCR102C:70:20	AAGCTGAATACAGATTATCAACGACAATTACATATAACCTACAAACAGGC	-0.244619	14	9
YCR104W:125:75	AGTGATGACAGATGGAGGAACGGGTATAAATAGAGCTGCTTCAACTATAT	-1.03308	65	19
YCR104W:175:125	GGAGGATATGTGAGGTGCTAAATGAGCGTCTGTTAACGAATCGTTTAAGT	-0.911152	481	164
YCR104W:225:175	AACAAGAGCATCTCCATAGAGATAATGAGATTGTGTGAAAGATGAGATAT	-0.730126	38	15
YCR104W:262:212	CATACGAAACCTATGAAAGATGTATGATTCGTTCAGAAACAAGAGCATCT	-0.836512	121	44
YCR104W:287:237	ATGAGTGCCATAAAACAATACTCCACATACGAAACCTATGAAAGATGTAT	-1.08509	72	20
YCR104W:50:0	CACTATTTCTTGTTAAGATTACATCAGCACTAACAAACAAAACAAATACA	0.217199	68	72
YCR104W:75:25	GCCTTTGAGGTATGCGCTTTCATTTCACTATTTCTTGTTAAGATTACATC	-0.190376	600	422
YCR106W:30:0	GAACATGAAATTGGCTGCTGAAATGCTCTG	-1.01832	968	297
YDL001W:50:0	ACTACTCAGCTTAAATTAGCATTTTAAATACATTTAATATTCAATTAGTC	0.400396	132	168
YDL001W:58:8	GTCCAACTACTACTCAGCTTAAATTAGCATTTTAAATACATTTAATATTC	0.209637	19	20
YDL002C:50:0	AGAATTGGATGAGAAGCAGCCAGGATATAGGTAATAGTAACACATAAGAA	0.25801	48	53
YDL002C:70:20	ATTAAATCGTTCTAGGGGCTAGAATTGGATGAGAAGCAGCCAGGATATAG	-0.450063	69	37
YDL003W:50:0	TCAAAGAAAAGACAACTCAATTGCACAATTACTTTACAAGAAACACGACA	0.562083	78	117
YDL003W:73:23	AATCCATAACAAAAAAGGACTGGTCAAAGAAAAGACAACTCAATTGCACA	-0.519397	76	38
YDL003W:98:48	ATAATTGTTAAACCAATAAAAGGAAAATCCATAACAAAAAAGGACTGGTC	0.160847	0	0
YDL004W:43:0	AATCAATTTGTGAAGGTATAACTGTAGCCGTGAGGATAGGAAA	0.657283	13	22
YDL005C:40:0	GAAGGCGGATCCTCCCAAATAAACTGCCCGTCTGAAAGTA	0.00723506	308	264
YDL006W:125:75	AAATAGGCAGTATTATCAATTAGGAGGTGAGTTAAATTCCATTCTATACC	-0.317456	120	74
YDL006W:175:125	GATAGTTTAAGTAAGTGAACGCTTATTTTTGTTGTCGTTGAAAAGAAAAT	0.0316348	65	57
YDL006W:225:175	TTTTTATCCGGATTCCTTTACATTAACAGACCCCAAACACAACAAGTTTT	0.138868	91	89
YDL006W:275:225	TTTGAGGTCACTTTTTTTCGTCTTAAACAGCTCTCAAAGTTGTCTCAAAA	0.500062	155	218
YDL006W:323:273	GTATACCTTTGCAAATTGAAAGCTTAGTTAAACATTATTATTCGTGTGTT	-0.362402	26	15
YDL006W:348:298	AGGAAACTAAAACTCAAAAGACAAAGTATACCTTTGCAAATTGAAAGCTT	0.160847	0	0
YDL006W:50:0	TACTTCATATATCATTTAGGCACTGCATTTATCTTTTAAAAATCATTATA	-0.937766	11	3
YDL006W:75:25	GAGTATACGAGATTTTGCACATTCTTACTTCATATATCATTTAGGCACTG	-0.062297	159	127
YDL007W:38:0	AAGTTAAAGAAGAGACAGCGTTTTTAATAGAAAATAAA	0.713847	64	112
YDL010W:33:0	AACCTAGCGGTTTAATATAGAAACAATTTTATT	0.491566	1045	1455
YDL012C:17:0	AAGCAAATACACATCTC	0.346783	5475	6594
YDL013W:112:62	CAAGTCGAAATTTGCACTAGGAGCTTCAGTCTAGGAGTGAACTTTTGAAA	-0.665832	47	20
YDL013W:137:87	GTGTGTTGCGTTGATTGGTAATAACCAAGTCGAAATTTGCACTAGGAGCT	-0.762963	266	105
YDL013W:50:0	AAAAATTATTATTTGGAACGCGGAGCTCCTCTAATAGTCGAAATAATAGA	1.03632	9	23
YDL013W:75:25	TGAACTTTTGAAAAGATTTCAGTCCAAAAATTATTATTTGGAACGCGGAG	-0.563717	96	46
YDL014W:118:68	CTACTGTTATATAAGTTATTCTTCGAGAAACAATTAGATATCATTCATCG	0.160847	16	16
YDL014W:143:93	AAGAAGTTTTCCTTACATCGGTATACTACTGTTATATAAGTTATTCTTCG	0.610461	191	300
YDL014W:50:0	ATTGCTTTCAATAACTCCGATCAAATTAACTCAAATCAACTAAAACAGTA	-0.0940457	39	30
YDL014W:75:25	TTCATCGGATAAATCTAAGTTGCCCATTGCTTTCAATAACTCCGATCAAA	0.234954	12	13
YDL015C:46:0	AATTGAGCTATTTGAGAGAGATACATATTTTGAATTTAATTTGAAA	0.160847	27	27
YDL017W:23:0	AGTTTCGAAGTAGAACAATCATA	0.266695	1638	1821
YDL018C:50:0	ATAGTTACCGTACTTGAAGGGACACTGTGAACTGACTAAAAAACTCCGTC	-0.0904679	206	160
YDL018C:60:10	AAGGCTCTTGATAGTTACCGTACTTGAAGGGACACTGTGAACTGACTAAA	0.055486	109	98
YDL019C:125:75	CCAAAGTTGCTTAATATTACAAAGGTGAATATCAACCAATCGTCCCAAGG	0.766982	17	32
YDL019C:175:125	TTAAGTGCAAGATATTCTGGTCTCTTTTTTCAACGTATATAATCTATTTA	0.12078	330	317
YDL019C:210:160	ACGAATTTTTTGTAGTTTTGGCTTCTTTTTTGGTTTTAAGTGCAAGATAT	-0.0469906	388	315
YDL019C:50:0	ATTTCATCGATAATCATAAGCTTAAGCTCGCCAACTGAAAACTTCACAAT	-0.31823	154	95
YDL019C:75:25	AAAATTTTTAAATTTAACCTAGCATATTTCATCGATAATCATAAGCTTAA	0.160847	0	0
YDL020C:125:75	CAGTTCCATTTTGTTCATCCTTTTCTCCTCAAGGAAGAACTCCGCTTTTT	-0.781814	633	246
YDL020C:175:125	AAACCCGAAACTCTTTTTTCTTCTTGGCGTGGAATATTTAAGGAGTAGAT	-0.0679951	43	34
YDL020C:219:169	TTCAAGGAGGAGGATACGTTTTATCTCTAATATAAATTAAAGATAAACCC	0.427909	48	63
YDL020C:244:194	AACCCACACGGATAATTTTTTATCGTTCAAGGAGGAGGATACGTTTTATC	-0.11359	99	75
YDL020C:50:0	AATAGCTAATTTGTATCTTTTCAAAAGTTTTCTAGAATTTTCAAGCAATC	-0.206004	126	87
YDL020C:75:25	AGTTGAACTAATAGTAGATAGTACTAATAGCTAATTTGTATCTTTTCAAA	0.330746	134	159
YDL021W:35:0	ATAAAAAAAATATAGATATATTAACTTAGTAAACA	-0.0283955	28	23
YDL022W:50:0	TATATTGTACACCCCCCCCCTCCACAAACACAAATATTGATAATATAAAG	0.160847	5	5
YDL022W:65:15	ATCAAGAAACAATTGTATATTGTACACCCCCCCCCTCCACAAACACAAAT	-0.532301	5	2
YDL025C:125:75	CTTTTCCATAAGTTGATTACGCTATTCACCCAAACTGACTCTTTAGTGCG	-0.0963764	484	374
YDL025C:175:125	AAAGATATAATACTTATTTGCAGCCAATAGTGACGGATTCTAGTGTTCTT	0.141174	153	150
YDL025C:210:160	ACCTGTTATGGGGCAAGCAAGATTTCTCATTGAAAAAAGATATAATACTT	-0.567392	28	13
YDL025C:50:0	GGAAAAAAAGAGAGAAGGACAGAAAAGAGCAGCCTGAAATTCATAGCATA	0.160847	0	0
YDL025C:75:25	CTAATAAGCTGAGAGGATTTGAGAGGGAAAAAAAGAGAGAAGGACAGAAA	0.160847	0	0
YDL027C:46:0	AGCGCAGATAAATAAGACCACCATAACCACATATGAGTAGGAAAAA	-1.9186	7	0
YDL028C:124:74	ATAGAAGCCTACTTGACCCAGCCCACTGAAGTCTGAATAGGAATATTGCA	0.442486	82	109
YDL028C:50:0	ACCAAAATAATAAATTGTTTCTGCAAGAACTGGATGATCTCAAAACAAAC	0.121626	25	24
YDL028C:75:25	AGTTGTTTATAGAAGTAGCTTTACAACCAAAATAATAAATTGTTTCTGCA	0.160847	0	0
YDL029W:28:0	AATAAACTAACAAAACTATATAATAATA	0.495308	568	794
YDL030W:50:0	TATACATTCATTTAATTTTGCTTTAATAGGAGTAGGAGGGCATCATCTCA	0.0493726	236	211
YDL030W:54:4	GGTGTATACATTCATTTAATTTTGCTTTAATAGGAGTAGGAGGGCATCAT	-0.718403	52	21
YDL030W:79:29	AAGAACCTTCGGTGAGCCAAGCGAGGGTGTATACATTCATTTAATTTTGC	-0.133833	238	177
YDL031W:50:0	AAGTACTTTTGTCATTTAAGTTACCACCACATATCTCTTTAACCTAGAAT	0.0941551	123	115
YDL031W:53:3	TAAAAGTACTTTTGTCATTTAAGTTACCACCACATATCTCTTTAACCTAG	0.0836569	174	161
YDL033C:47:0	AAAAATGTGAGCGTATTGATTTGGCAATCGATTCAAGTCAGATAACA	-1.22545	39	9
YDL035C:125:75	CCAGAAGAAGGTGTGTGTGTGTGTGTGTGTGTGTGTCTATAAAAAGCAGT	-0.558276	77	37
YDL035C:175:125	TTCTAGCTTTTGTCCTTTTTTATTTGTCTACATCCCTTTCTCTACGGTAT	-0.295432	766	485
YDL035C:225:175	TATTTGCGAAGGTCATATTCAACGCAATCGCACGTCCTCTTCCGTCTTTT	-0.555089	1153	563
YDL035C:259:209	GCATTGCGGCAAAAACGTCATATTTATTAATATTTATTTGCGAAGGTCAT	-0.144535	56	41
YDL035C:284:234	AACGAAGGAGTGGGTTATAGAATTAGCATTGCGGCAAAAACGTCATATTT	0.160847	0	0
YDL035C:50:0	CAAACAAGTGATCCGAAGTGTGACGAATAAAGCAAACTCTCCAACTCAAA	-0.478233	35	18
YDL035C:75:25	AAGAGTCACCAAAAAAAAAAAACGACAAACAAGTGATCCGAAGTGTGACG	0.160847	0	0
YDL037C:125:75	CCTTGCTCACAAATTCAGCGACTGCTGATAGAATTGATGACAAGGTGAGC	-0.767714	204	80
YDL037C:153:103	CTAATATCATTTTGCCTCCTATTTGCGGCCTTGCTCACAAATTCAGCGAC	0.0122219	390	336
YDL037C:178:128	ATCCACATCATTCATAAGAAAACTACTAATATCATTTTGCCTCCTATTTG	0.221656	318	338
YDL037C:50:0	ACGAAAGCGTTGCTATCAATGGTTGTCCAAATTTGGATTTCAACTGGCAC	-1.05625	178	52
YDL037C:75:25	CCTTCATTTGATCTAAGCAAAAGAGACGAAAGCGTTGCTATCAATGGTTG	-0.568077	312	150
YDL040C:27:0	GAGGAAGGCGATTGACCCTAACGAAGT	-0.202856	4079	2835
YDL042C:50:0	TCGGTAGACACATTCAAACCATTTTTCCCTCATCGGCACATTAAAGCTGG	-0.631735	242	109
YDL042C:60:10	AGGCATCGCTTCGGTAGACACATTCAAACCATTTTTCCCTCATCGGCACA	-0.324281	985	606
YDL043C:50:0	GGCAGGTGGAACAGCAAATTCAAATCATTTAACGCATCCATACATTCAAA	-0.210217	99	68
YDL043C:53:3	AAGGGCAGGTGGAACAGCAAATTCAAATCATTTAACGCATCCATACATTC	-0.338743	294	178
YDL044C:5:0_YBR139W:5:0	ATACA	-0.0781453	27490	21646
YDL045C:111:61	CGAAAAATCTTCGAAAGATTTTGTTGACTGAGAGTGGAAAAAACTGATAT	0.160847	19	19
YDL045C:136:86	AAGGATCCGTCTATAGAAAGAACCTCGAAAAATCTTCGAAAGATTTTGTT	0.259287	57	63
YDL045C:50:0	TATAGAGGGCAACATTTGCAAAAAGTAATAAACAAATAGGGGAGCACAAT	0.160847	0	0
YDL045C:75:25	GAAAAAACTGATATTACTTTCTCGGTATAGAGGGCAACATTTGCAAAAAG	0.160847	0	0
YDL045W-A:44:0	GAGGGCTCGCCGAAACTTCCATCTAAAATAAAGAGTGCCCATTA	0.0407022	317	281
YDL046W:50:0	AAGCATAACCATATTAAATCTTCTCCTTCAAAGCTAGCACGCCTTCCAAA	-0.43321	95	52
YDL046W:67:17	GATTCGCCAAGGCAGAAAAGCATAACCATATTAAATCTTCTCCTTCAAAG	0.246976	188	205
YDL047W:125:75	CACATACGGTCCCTCTTTCTCTTCCTATTATTCTTCAGTCCCCTCCTCGC	-0.452569	1975	1069
YDL047W:175:125	TACAATAGGTTATTGCATACTATCATAAGCATACAGATAAAGGAGTTCTG	0.160847	0	0
YDL047W:205:155	AGACGGTAGATAAAAAAGAAAAAGAAGCAATACAATAGGTTATTGCATAC	0.343168	9	11
YDL047W:50:0	TGAAATACTATTGAAGCTCAAAAACATCCATAATAAAAGGAACAATAACA	0.160847	0	0
YDL047W:75:25	TCTTTTTAGATTCGACATTACAAGGTGAAATACTATTGAAGCTCAAAAAC	0.75335	46	84
YDL049C:125:75	TTAGTTACGTAAATTTATAAAAACGTATCGATGAAAGTTGCACAGAAGTA	-0.616858	36	16
YDL049C:152:102	GTTCATGTATAATATTACATGAGGTAGTTAGTTACGTAAATTTATAAAAA	0.160847	0	0
YDL049C:177:127	AAGGGACATTGGACATTATGTGCTCGTTCATGTATAATATTACATGAGGT	-0.624108	170	77
YDL049C:50:0	TCGACTTCTTAGGTAGGTAACAATAATAAAAAATCAATTACGTAAAACGT	-0.33559	22	13
YDL049C:75:25	AAAAGTAAAGTATACAAGTATTACGTCGACTTCTTAGGTAGGTAACAATA	0.633451	47	76
YDL051W:42:0	ATTTGGTTCTACTGGAACTAAAGTAGCATCTGCAAAGAAGTA	0.471001	43	59
YDL052C:36:0	GGTTTCCCTCCGTCAGTGAATTCGAGCAAAAAAATA	0.389105	38	48
YDL053C:125:75	TTTAATTCTTTTTTTCTGAAATTTTTCATTTGTTCACTGTTTAATATCTA	-0.565453	183	88
YDL053C:173:123	AGGAACAACAAATAATACGATCTTGTGCATATTTTTTCCCTTTTTTTTTT	-0.05375	232	187
YDL053C:198:148	GAGACTAAATAGAAAGAAAAATACGAGGAACAACAAATAATACGATCTTG	0.237808	24	26
YDL053C:50:0	TAACTTTATTACTTATTTACGATACAATTTTCCCTTTAATCTAGTACGAA	0.3545	116	141
YDL053C:75:25	TCCATTTTTGTTTCCGAATTTTCATTAACTTTATTACTTATTTACGATAC	-0.0845638	192	150
YDL054C:50:0	GTTTCCTTTCATATCATTTTATAGCAATAACCATTTTCCAAGTGCAAATC	-0.109886	155	118
YDL054C:61:11	CATCGAGACTAGTTTCCTTTCATATCATTTTATAGCAATAACCATTTTCC	-0.163273	176	127
YDL054C:86:36	ACTCAGACAGCAACTTCTAACGTTTCATCGAGACTAGTTTCCTTTCATAT	-0.208753	355	245
YDL055C:124:74	GCAAACTACTTTACATTCGCTAACTCTTTTCTTCTGTCCAAATATTTTGT	-0.270936	153	99
YDL055C:149:99	GACTTTGATAACGTTCATCAAGTGTGCAAACTACTTTACATTCGCTAACT	0.259013	571	630
YDL055C:50:0	AGCACAAGACAAGCTACAACTTCAACAAATAAAACATATATAATTGAAAA	0.160847	0	0
YDL055C:75:25	TTGACTATACAAACAAAATATTATCAGCACAAGACAAGCTACAACTTCAA	1.25946	16	50
YDL056W:115:65	ATCGGAAAATAAAGCCCATTGTAATTCATATAACTAAACATCATATCAAG	0.979157	59	135
YDL056W:50:0	AAATCGTGCTTAACATTCCGAGACACAACGTAAATCCCAGAAACACAAGC	0.779886	48	90
YDL056W:75:25	TCATATCAAGTGCGATTGGTCTGCAAAATCGTGCTTAACATTCCGAGACA	-0.433247	508	280
YDL057W:47:0	ACTAAAAAGATCAGAAAAGGGAATATTTGTCAAATAACCAAGTCGAA	0.387374	58	73
YDL058W:50:0	TTGTTCACGACTTCGAGTGATTAATATCTATAACAACCCTCCTATCAAGA	0.359297	81	99
YDL058W:55:5	AATTCTTGTTCACGACTTCGAGTGATTAATATCTATAACAACCCTCCTAT	0.170508	205	207
YDL058W:80:30	AGAGACTGAATACTGGAGAGAAGACAATTCTTGTTCACGACTTCGAGTGA	-0.170008	212	152
YDL059C:113:63	AAGGAAGGATAAGAACATCATTGAGGGAGTCTGTGGCAGTTTAGCACATG	-0.592925	67	31
YDL059C:50:0	AAGGGTTACGTAGAGGAGAAGAGCATATTTCAGGATAAACAGACAAAATA	0.160847	0	0
YDL059C:75:25	GTTTAGCACATGCTTTGGACCATTAAAGGGTTACGTAGAGGAGAAGAGCA	-0.175626	69	49
YDL060W:20:0	AGTTTTACGCAGGCATCAGA	0.362516	4546	5562
YDL061C:125:75	ATAGTCGAAAAATTCTATTGTACACGTCCATGGAACTCCTGGAAAACATA	0.160847	0	0
YDL061C:175:125	AAATACAATGAGCCATAGCATAAGCTTATATTTATTTCCTTTTAACTTCG	-0.665832	79	34
YDL061C:225:175	ATTGAATGTAGCAACAAGCATCAAACATCAACAAAGCTTCAAATTATGTC	-0.967619	135	43
YDL061C:275:225	TAGGGGGGAGCCTTTCTGGTGGCCCCATGGTGGAATAAGACGATGTGTTT	-0.964083	461	149
YDL061C:325:275	TTTACAACTAAAAGAATTGAAAATTCGAGGAAAATATCTGTGGCTAGCAG	-0.0709551	28	22
YDL061C:375:325	TGAAGGAACAGCAGGAAAGTATCTGCGCTGATTTGGATTTGTAACTAAAA	-0.566202	59	28
YDL061C:417:367	GTGGAAACGCGGATTGAAGAGACAAGGGACGTGTATGCAGAATGAAGGAA	-0.208061	93	64
YDL061C:50:0	CATTTTTCTATTCAATTTTGAAAACTTATTGGTTATAGAATATATACAAA	0.705148	93	161
YDL061C:75:25	AAAACTGCAAAAATTATAATACTAACATTTTTCTATTCAATTTTGAAAAC	-0.937766	2	0
YDL063C:50:0	TTTCGAGTTTGTACAAGGACGCAGAAATCGACTTTTTAGGGCAGAAAAGA	0.308656	112	130
YDL063C:68:18	AAGTACTTTCGATCAGATTTTCGAGTTTGTACAAGGACGCAGAAATCGAC	0.403973	326	416
YDL064W:40:0	ATAGGATAAGCACACACTGGCACCATTTTTTGGAAGCAAT	-0.377783	388	226
YDL065C:41:0	ATTGACGGAAAGAAGAAATGCCAAACATACAACACGAAGTA	-1.16091	29	7
YDL066W:17:0	AAGGAAGATCGCCCAGC	0.116727	5328	5098
YDL067C:46:0	AAGCAAGATATTTGCAAACTACTAACTACAAGCGACTTACACAGAC	0.160847	0	0
YDL070W:32:0	AAACAGATTGAGCGAAATAAACCTCGGCGGCT	-0.7429	1821	737
YDL072C:50:0	GTAACCACGTCACATTATACTCATAACCATAGAATTCACAGAATTGAATC	0.160847	0	0
YDL072C:71:21	AGAATAGTGAGCTCTTCCAAGGTAACCACGTCACATTATACTCATAACCA	0.262426	158	175
YDL073W:125:75	AGAATTTCACCAGTGATTTTCCCAATATTATCTTTCGTGGGTAGAGAAAC	-0.0585163	131	105
YDL073W:155:105	CTTTTTGAATCCACTGAAATTAACGATCTCAGAATTTCACCAGTGATTTT	-0.306629	157	98
YDL073W:180:130	AGTGCCTATTGTCGATCTGCTCTTTCTTTTTGAATCCACTGAAATTAACG	-0.709635	159	66
YDL073W:50:0	ATGCTATATACGCATTGTTGTAGCACTAAAGATCATATTGCTCATTAAGC	-0.339929	131	79
YDL073W:75:25	AATTCTGAACTCGATTGTGCTTCGTATGCTATATACGCATTGTTGTAGCA	-0.290401	580	369
YDL074C:50:0	AGGGCTTTCACCGTTTTTATGCTAATCGTGCTAGCTGATAATAATCAGAT	0.0335071	275	242
YDL074C:72:22	AAGGTTTTTAACAGAGATAGAAAGGGCTTTCACCGTTTTTATGCTAATCG	-0.14094	118	87
YDL075W:31:0	AATAAGCAAACAGAACTCAATCAAAGGAAAA	0.389798	411	517
YDL076C:123:73	ATCAAGTGCTATAGAATTCCATGACAGCGTTTTGACAAATAACGGTATTT	0.160847	0	0
YDL076C:50:0	TACTCGCAGTTTTTTTTTTGAGAGAAGTAACAATACAATATAAGATAAAA	0.615583	32	51
YDL076C:75:25	TTTAGTACGAAGGTAAGGGAAAATTTACTCGCAGTTTTTTTTTTGAGAGA	1.03304	50	121
YDL077C:125:75	AATCTTACCAATTGAGAGCGATTCCTGTAATTAGGTTTACGGCTGTTCAA	-0.104333	248	190
YDL077C:170:120	GTGGACTGTGACAAACTCTGCCAAAAGTCAAGCTCTAATCGTGTAAATCT	-0.497454	422	218
YDL077C:50:0	ATATTGATCAGCAAAAACCCTTCAAAATATCAATTTATACCAAAAATTAA	0.72954	46	82
YDL077C:75:25	TTATCTTTTCAACCGGACGGGTCTTATATTGATCAGCAAAAACCCTTCAA	-0.144535	227	167
YDL078C:50:0	AAACACTTGTCAGTGCAAAAGAAAATAAAAAGAGACAAACAATCATAAAC	0.160847	0	0
YDL078C:72:22	AAGGCCTTCGTAAATCAAGGGAAAACACTTGTCAGTGCAAAAGAAAATAA	0.361517	26	32
YDL079C:125:75	CTAAAAAATACTGGTGCTATAAGAACCCTGCTGCATACAAGTATTTCCGT	-0.532301	89	44
YDL079C:175:125	AGATTGGTTCTCCTTTTGTCGCTATATCTTGCAACTTAAATAAGCATTCT	-0.111411	192	146
YDL079C:209:159	TACCGGAGAGCTGTTCCAGCGGCGGATCTGAGAAAGATTGGTTCTCCTTT	-0.72626	725	298
YDL079C:234:184	AGGGGCAGCATTATCCGTTAGGATCTACCGGAGAGCTGTTCCAGCGGCGG	-0.902148	523	180
YDL079C:50:0	TTGAAAATAATCTCAAGATTGAAGAGGTGAAAATTGTAAAATAGTCTACT	0.471001	21	29
YDL079C:75:25	TTCTACCATACTGCGGGGAAGGGACTTGAAAATAATCTCAAGATTGAAGA	-0.277408	30	19
YDL080C:125:75	TTTGGTAAGCACCAAATTCGTAATTCATTATCGATATTGTGTAGAAAAGA	-0.430831	102	56
YDL080C:175:125	GAACAAATTTCCCTTTCTTCATACTTTACGGCATAGTAATCTTTGAACCT	0.363421	333	408
YDL080C:209:159	ATAGAAGAAAAATTGATGAAACTTGCGATGCATTGAACAAATTTCCCTTT	-1.69991	44	6
YDL080C:50:0	AAAGGTTTGAAAGAACATAACTACTAAAACGCACCGTCGTCATTCTGAAG	0.213858	348	367
YDL080C:75:25	GTAAAATATAATAAAACGAAAAAAAAAAGGTTTGAAAGAACATAACTACT	1.0858	22	57
YDL081C:50:0	TTGTCCAATACAACAGCTTAAACCGATTATCTCTAAAATAACAAGAAGAA	0.160847	0	0
YDL081C:66:16	AAAGAAATAGTCCGCTTTGTCCAATACAACAGCTTAAACCGATTATCTCT	0.269387	156	174
YDL082W:50:0	TCGAAGGGGTTTGAGAAAAGCATAGTACAGCACAGCAGGAATCGTACACA	-0.49308	74	38
YDL082W:72:22	ATTTAAGCTTGCAGCATTCTGTTCGAAGGGGTTTGAGAAAAGCATAGTAC	-0.241716	171	114
YDL083C:30:0	GAAAAATACAGCAAGAGAATAAGCAACAAG	0.604778	135	211
YDL084W:116:66	ACGGAACTGTTTGCCTGTTGGAATTTTACGTTACTATTCTCATCGGTATA	-0.136516	345	256
YDL084W:50:0	TTTGGCAATAGGTTAAAAAAAGCTCGTTCATTTTTTTAAAAACAGCAACG	0.412161	6	8
YDL084W:75:25	ATCGGTATAACTAGCTTATATTCACTTTGGCAATAGGTTAAAAAAAGCTC	-0.295912	29	18
YDL085C-A:50:0	AATACTACACAGAGCAACAAATTACGTCGCAAGACGATACATCTTTAACA	0.392176	72	91
YDL085C-A:59:9	AACAAGATCAATACTACACAGAGCAACAAATTACGTCGCAAGACGATACA	0.055486	19	17
YDL087C:16:0	GCCAACTACCGTCAGA	0.380939	5251	6544
YDL088C:103:53	CCCGATAAGGTAGACATATCGTTTCCCTATCTATTTAAGTTTTTTATTCG	0.382059	621	775
YDL088C:128:78	ACACATACCTCTGCATAGTTTATTTCCCGATAAGGTAGACATATCGTTTC	-0.525612	148	74
YDL088C:50:0	TCTTTTTTTTTTTTTCTCTGTAACCTGAAAACAAGGAACGGCAAATTAAA	0.0867385	13	12
YDL088C:75:25	ATCTATTTAAGTTTTTTATTCGCTCTCTTTTTTTTTTTTTCTCTGTAACC	0.239915	157	170
YDL089W:125:75	GTTGGGACAAGTGGTAGTTTCCTTAAAGTCTGGTTTGATTGACAATATTT	-0.140856	406	300
YDL089W:175:125	CTGCAATATATAAAGGAAGAAGTTAACACCGTATTAAAAGGGGTGAGGCC	0.160847	0	0
YDL089W:225:175	AGCACGGGAATAGTGATCTCTTTCAATAGCGAAAGGAGGGAAAAATAGCC	0.303947	12	14
YDL089W:275:225	TAGGTGGATTAAGTTACAAGTGTTTTTGTCCTCCTACTTAATCAGAACAG	0.753068	124	225
YDL089W:301:251	CTAACGTTAGCCAGAAATAATAAGAATAGGTGGATTAAGTTACAAGTGTT	0.626936	63	101
YDL089W:326:276	GTTAAACAGTTTCGCTTCAAGACCTCTAACGTTAGCCAGAAATAATAAGA	-0.257864	37	24
YDL089W:50:0	AAAAACTTTGTTGTGCAGTAGAGAGCTTTACATTTACCTTCGGCAGTAAA	-0.37996	78	45
YDL089W:75:25	AGAAGTTAGTGAAACGAACAACCTAAAAAACTTTGTTGTGCAGTAGAGAG	0.279708	102	115
YDL091C:50:0	GTTGTACCTCATCAATCGGCTTGACTGCGATTTAAACATACCCTTTAAAC	-0.19499	510	357
YDL091C:71:21	GCAATCGTACTCCCAAATTTTGTTGTACCTCATCAATCGGCTTGACTGCG	-0.51318	258	131
YDL091C:96:46	GTGAGAGTAAGTTCAAAAACAGCGGGCAATCGTACTCCCAAATTTTGTTG	-0.452789	289	156
YDL092W:23:0	AGCTTTCTTACCACCCTAAAACA	0.232776	3807	4091
YDL093W:25:0	GTGTAAGATCATAACTGCTTTAAAG	0.337753	2190	2614
YDL095W:50:0	TAGTATCAGAAGAGCCTATCAAGAAACAGCTAACAGCTACAAGCACGGTC	0.807474	32	62
YDL095W:55:5	CGAGGTAGTATCAGAAGAGCCTATCAAGAAACAGCTAACAGCTACAAGCA	0.219115	49	52
YDL095W:80:30	AAGACAAACAGGTGCATTGTTAAAGCGAGGTAGTATCAGAAGAGCCTATC	0.372747	160	198
YDL097C:32:0	AATTGGTGATTAATCTATAAACGAGGAACTTC	0.263308	379	420
YDL099W:20:0	AAGTTTATCATATAGTTACA	0.277633	3123	3510
YDL100C:36:0	GTACGACAAGAACAAGAAGATCATCACATTGTAATT	0.40081	1013	1288
YDL101C:50:0	TAACAAGTAAAGGGGCTTAACATACAGTAAAAAAGGCAATTATAGTGAAG	0.160847	1	1
YDL101C:61:11	ATAGTCGAGAGTAACAAGTAAAGGGGCTTAACATACAGTAAAAAAGGCAA	0.177654	58	59
YDL102W:50:0	TATTGAGCACTTGCTATTAAGCATTAATCTTTATACATATACGCACAGCA	0.641213	119	193
YDL102W:67:17	GGATAAAGGAAAATAGATATTGAGCACTTGCTATTAAGCATTAATCTTTA	-0.612343	12	5
YDL102W:92:42	ACTACTGATCTAAGGCAATTTTCAAGGATAAAGGAAAATAGATATTGAGC	0.086123	249	231
YDL103C:50:0	GCTGCAAAGAAACGCAGATATAAAGGAGAACACCAGATCGAACTGCAACT	0.063208	42	38
YDL103C:73:23	AAGATCAACCGTCAAGCAAGAACGCTGCAAAGAAACGCAGATATAAAGGA	-0.0735542	66	52
YDL104C:21:0	ATAGAAACTTTTTTTTTCATT	-0.388513	3491	2015
YDL105W:41:0	AAATCAGAGTTTTGCAAAAAAAAGAGAGTACAGACAGAGAC	0.805204	41	79
YDL106C:50:0	CAGGGCTAGACAAGTCACGGCTTACTGCTAAATAACGTATACAATACGCT	-0.466549	102	54
YDL106C:64:14	AAGGAGACATTCAACAGGGCTAGACAAGTCACGGCTTACTGCTAAATAAC	-0.235049	51	34
YDL107W:21:0	AAGAAATATCTGATCTAAAAT	0.310544	1671	1941
YDL108W:23:0	ATTCCCGGCCTCAGAGCGAACAT	-0.343043	4309	2603
YDL110C:50:0	TTATAAAACATAAAGCAAATCAAAACATAATAACTACTACAAGTAACATA	0.912263	24	52
YDL110C:57:7	AAGATCTTTATAAAACATAAAGCAAATCAAAACATAATAACTACTACAAG	0.160847	0	0
YDL111C:50:0	CTTTTTGACTAGCACAACGACAGTTTGAGATTCTGTTGAAATAATCATTT	0.203406	68	71
YDL111C:61:11	CAAAAGGCATTCTTTTTGACTAGCACAACGACAGTTTGAGATTCTGTTGA	-0.605755	352	163
YDL112W:50:0	GAATTGTTTAACGAACGTTACAAACTCTATACCTTTTTTTTACCAGCAAA	0.602679	44	69
YDL112W:55:5	GAAAAGAATTGTTTAACGAACGTTACAAACTCTATACCTTTTTTTTACCA	0.56846	154	232
YDL112W:80:30	AAGCCAAGCCTTATTAAAATCCGGTGAAAAGAATTGTTTAACGAACGTTA	0.283449	45	51
YDL113C:50:0	GTGGTGCAATTGAACATACCATCTAGAAAAGTTGTCTTCTACAGCACACA	0.37707	28	35
YDL113C:61:11	CTCGAATACTGGTGGTGCAATTGAACATACCATCTAGAAAAGTTGTCTTC	-0.363009	205	121
YDL113C:86:36	ATCTCCAAAATGAAGAGATGACTAGCTCGAATACTGGTGGTGCAATTGAA	-0.107417	16	12
YDL115C:42:0	GAGGTATAGCTTTTGTTGAGGTAGGCATACAAGATTTCGGGA	0.044071	371	330
YDL116W:50:0	CTGAAAACCAATTGAGTGCTACTTCGAAGTAAAATACATAGCCATTTCAA	0.530481	160	232
YDL116W:67:17	ATATCAGCTAATTCAACCTGAAAACCAATTGAGTGCTACTTCGAAGTAAA	0.178865	54	55
YDL117W:125:75	TAATATCTTTTTATCCGTATTAATTACCGCATATAATTTTAGTTCGAAAC	0.356591	36	44
YDL117W:175:125	CACATTAACTGTTTGCTATAAGCATACATTGCTTTTACCACTTTTTTTAA	0.0991529	233	219
YDL117W:225:175	TTAAACTAATTTTTCTTTCTTCTGATTTCACTTCGTCCTTAATATTTTAA	-0.184655	266	188
YDL117W:275:225	GGGACTCTGTTTGCATAACATATCTATAATATCAGTTTGATCTACTGCTG	-0.114706	518	393
YDL117W:321:271	AATTGGATATTATACAGTTAAAACAAGAGAAAAGGCCAAAATTAACGGGA	0.381247	72	90
YDL117W:50:0	ATTATAACATTTAATTCCTGAATTTACCGTATTACATTTAAATTTGCATA	0.395325	192	243
YDL117W:75:25	ATTAAAGGTCAGTCCCGAAGTTATAATTATAACATTTAATTCCTGAATTT	0.545258	127	187
YDL120W:50:0	CAGAAAGATAGTATTTCAAAAAAAACTAAGCGAGAAGATAGAGTGTAGCA	0.160847	0	0
YDL120W:55:5	AATACCAGAAAGATAGTATTTCAAAAAAAACTAAGCGAGAAGATAGAGTG	0.160847	0	0
YDL120W:80:30	ACTTACAAATCGTTACGTACTACTGAATACCAGAAAGATAGTATTTCAAA	0.736211	53	95
YDL121C:11:0	AAGTCCGGAGC	-0.321755	8546	5274
YDL123W:13:0	AGGGACGCGCATC	-0.0450594	12724	10356
YDL124W:45:0	GTGTTACCCTAAAGAAACGGAGGTCAGTTAACAACACTTTTACAG	0.629028	205	328
YDL126C:50:0	AACGCCATTGACTCGATAACTGGCTCAACTACAAGACAGATATACAAATC	0.579825	97	148
YDL127W:50:0	TGATCCGACAAGAGCAATTTCAATACGGCAGCAACTTTTTACTACAAAAG	0.160847	3	3
YDL127W:71:21	AAGACCCGGTGCTAAACAACCTGATCCGACAAGAGCAATTTCAATACGGC	-0.026365	81	67
YDL128W:50:0	ACGCATATCATTCATCGGCTGCTGATAGCAAATAAAACAACATAGATACA	0.416193	54	70
YDL128W:61:11	AGTTGACTTCGACGCATATCATTCATCGGCTGCTGATAGCAAATAAAACA	0.127589	213	206
YDL129W:125:75	AGGCTTAGCAATACACCTATAAGGCACTAGAAACGTATAAAATTTGAGCA	0.175884	65	66
YDL129W:152:102	CTAAGTTGGACATACGTCGGTCCTTACAGGCTTAGCAATACACCTATAAG	0.295579	103	118
YDL129W:50:0	CGAAACGCGGGCAAGGCTACGGCATACAGGAATTTAACATTTTGTTGGCT	-0.0510539	198	160
YDL129W:75:25	CTTTAGTTTCTCATCCCTTTTGATACGAAACGCGGGCAAGGCTACGGCAT	-0.778792	324	126
YDL130W-A:50:0	GATATTAAGAAGCACTTTCACCCAGTCATCCAACCAAACACGCTATCAAT	-0.335133	311	189
YDL130W-A:51:1	AGATATTAAGAAGCACTTTCACCCAGTCATCCAACCAAACACGCTATCAA	0.412161	55	71
YDL130W-A:76:26	ATAAGAAAATTGAGCTCTCCATTGTAGATATTAAGAAGCACTTTCACCCA	0.213769	91	96
YDL130W:36:0	TTGGACTAACAAAGAAATCAAACAACTAAGAAGAAA	0.619154	42	67
YDL131W:36:0	AACGACAACCCAAGTAATTGTATACTTTAACAAACC	-0.0652082	429	342
YDL132W:125:75	ACATTTCTTTTAGCAATTCGACATTGCTTCTACTTACCGATAAATAAGCG	0.896919	56	118
YDL132W:175:125	CTAACTTCTGTGCACCCCTTTCATTGTTGATTACATTTTACCTCAGTTAC	-0.0830329	535	419
YDL132W:225:175	GCTCTTTTATATTGTCCTTTTTCTCTTTTAGAGCTTTTCATCCGCATCTT	-0.29377	760	482
YDL132W:275:225	AAAGTACCCCAGCAGAACTTCACTTTACAACGCAATTGATTCATATCACT	-0.307931	162	101
YDL132W:314:264	GTGGCAAATAGAACATCTAGAAAAACTAGGGCATTAGGTAAAGTACCCCA	-0.309157	47	29
YDL132W:50:0	CTTACATATACCTAAACAAAGAATAACAACAAAATCGCAAGCAGCAAAGC	1.04505	18	45
YDL132W:75:25	TACATTTTTGAGTCTTGAAAGGATTCTTACATATACCTAAACAAAGAATA	0.160847	0	0
YDL133C-A:18:0	ATATCGACTTAATTCCAA	-0.0765762	5289	4171
YDL133W:110:60	AAAAATACTTTGATTGCTATTTCGAAACCGTGAGATTGCTGAGAAGGGAA	0.132273	141	137
YDL133W:135:85	AACCACCTTTTGTTTAGTCAATTATAAAAATACTTTGATTGCTATTTCGA	0.685857	41	70
YDL133W:50:0	ATTTTTTTGCATTTTTTGAGGCGTTCTTTTTTTTTACACTGACAAATTTA	0.189975	202	208
YDL133W:75:25	TTGCTGAGAAGGGAAAGTGAATGATATTTTTTTGCATTTTTTGAGGCGTT	-0.532301	301	150
YDL134C:125:75	TTACCGGTTGTGTTTTTTGAAATAAGGCAAAAGAGAAAGAAAAAAACAAA	0.160847	0	0
YDL134C:175:125	TAGTGAGTTCAGGTTGAATAGAGTTATTATCTAATTTTAAACTGTTAATT	0.600099	193	300
YDL134C:225:175	CACTCGTCTTCCCCTAGTTTTCTTTCCTTACCAGTAATTTAGTAAGAGTT	-0.0726023	316	250
YDL134C:275:225	AAAAGTGTTTTATTCTTCTTAGAAATACACCTGTTGGACTGCTCTTTTTT	-0.819983	199	74
YDL134C:325:275	CAATTAGTTTTAGTGTAAATTAAATTGCCCCAGTGGACACGATATTTACA	0.386803	212	266
YDL134C:375:325	ATTAGTGAATCAGACGCTGCACTTTCATTGATTTTGATATACACATACTC	0.320695	224	263
YDL134C:425:375	GTTTTTGTTACAGGTTCCTTTCGACGCACCGTTTCACAGTAAAGGAGGTA	-0.195022	176	123
YDL134C:475:425	TAGTAGAAATAGTTTTCCGGATTACATTAGTTCGGCATTCTTTTTAGCAG	-0.334941	219	133
YDL134C:50:0	GTGGAAAGAGGGATATAAATTATCGCATAAAACAATAAACAAAAAGAAAA	0.160847	0	0
YDL134C:512:462	GAAAGATTTTCGGCTATTTTAATCGACTAACACATAGTAGTAGAAATAGT	0.241535	118	128
YDL134C:75:25	TTATTTTGCCCCTATTTAGTTCATAGTGGAAAGAGGGATATAAATTATCG	0.476485	193	265
YDL135C:45:0	GAATAACTCGAGTATTGAGCTTTTTTATTAGAGAAAAACTGAATA	-0.461349	135	72
YDL136W:50:0	GGGTTTGGTAGTACAGTGAGAACACGATAAAGAACCAAATAGGACTAAAA	0.160847	0	0
YDL136W:65:15	ACATCTCTTTTTTGGGGGTTTGGTAGTACAGTGAGAACACGATAAAGAAC	-0.543351	90	44
YDL137W:125:75	CAGAAGTTCTTCTTGTTAGCGTCTCTGTGCTCAATATCTCTCTTTTTTTC	-0.520872	1304	659
YDL137W:175:125	CGGCTCTGATGTTTTTCGAACGAAGATAAGGAGTTGACATACAAAGTCAA	-1.36521	68	14
YDL137W:225:175	TGATTATCTAATAGGGCCTAGTTATCCTAATTGTGGGGAGTCGAGCAGTA	-0.846794	62	22
YDL137W:275:225	GGTGGGATGAGTTCCTAAAGGCGCCCCTTTATTTGATCAGGAAGCCGTAT	-0.945146	271	89
YDL137W:325:275	GGTACTACGTGTTATATCATACCCAGAAGGAAGGACTCTCTCCACTGAAC	0.0122772	267	230
YDL137W:375:325	CTTTGTATGTAACGAGTTTCATTAGGAGGGATAGACGCACGACACTATCT	-0.464478	113	60
YDL137W:425:375	AAACTTTCTACGCAGACTCAAGTTGCAATAGGCTAAAGATAAGGCAGACA	0.561973	76	114
YDL137W:467:417	GCTCTTTCCATTCCCTTTGTTAATAGTAGTTTAATTCTTCGGAAACTTTC	-0.484569	224	117
YDL137W:492:442	ACCTGTTATCGGTTGAACTGTTTTAGCTCTTTCCATTCCCTTTGTTAATA	-0.281981	558	358
YDL137W:50:0	CCAACCAATAGAGATAAAAAAAAAAGGAATTAAGATTTCATAGAGAAAAG	0.160847	0	0
YDL137W:75:25	TTTAAGTAGTAATTACTAACATCAGCCAACCAATAGAGATAAAAAAAAAA	-0.532301	1	0
YDL138W:125:75	TAGTTGACGCTAAGGCATTCGCTTGTGAAATTAAAGAGCAGATCAGGAAT	0.296101	144	165
YDL138W:151:101	ATATAACATCCAGTATTCATTTTTTTTAGTTGACGCTAAGGCATTCGCTT	-0.673073	296	128
YDL138W:176:126	GAACAATAAACCTTTGCCTAATTTCATATAACATCCAGTATTCATTTTTT	-0.447618	214	116
YDL138W:50:0	TTGCACAGAAACCACTATATATATATGGAAATATCTCGAATATTGCTTGT	-0.847382	73	26
YDL138W:75:25	AGTATCAATAGTCTAAACCATCAAGTTGCACAGAAACCACTATATATATA	1.58796	5	24
YDL139C:31:0	ATCGACGCCTCCACTACAAATTAACAGAAGG	0.272859	1737	1943
YDL140C:125:75	TTTACCATTTTTTACTTTCTATCCTTGTTAACCAAATTTCAAAAAAATTT	-0.101518	129	99
YDL140C:175:125	AATAATAATATAATTATAAAAACCTCAACTAGAAACTCCAAAAAAAAAAA	0.160847	0	0
YDL140C:225:175	ATCCTCAAGTTTATCTACCAGAATATTTGACTAAGAAATCAAACTCTGTT	0.138623	90	88
YDL140C:275:225	GTATTATAAGAGGTTTTTTTTTTCATTCCAGATTAATTTTGAAATACGAT	-0.021475	17	14
YDL140C:325:275	GTTTTCCTAGCGAATTCCCTGATCAACTTTCAAGGAAAACTAAAACTACT	-0.937766	2	0
YDL140C:375:325	TAAAAACCCTCCAAAGTTAACCATTTGTTTATATTTGCTTTTCTGCATAA	-0.35473	210	125
YDL140C:425:375	TTATTCCTTTCATTTTCCAATAAAATTTGAACAGGATCGATATAAACAGA	0.303947	12	14
YDL140C:475:425	CTGTGTTGTTCTGATCGACTCTCTTTGTTAGTTTTATCTTCCATTTTTTT	-0.336577	1086	660
YDL140C:50:0	ACCAATCATAAAGATAGCAATAACACTTTACCCCAAAATATAAATCAGAC	-1.78506	6	0
YDL140C:518:468	GTATCATAAGAACATCCGATTCGTTCATTAACTGAAATCATATCTGTGTT	0.332318	138	164
YDL140C:543:493	AAGAACATTAATTGCTCTCACAGAGGTATCATAAGAACATCCGATTCGTT	0.063208	85	77
YDL140C:75:25	TACCTTTTCTTTTTCCAGAAGAGGGACCAATCATAAAGATAGCAATAACA	0.138374	44	43
YDL141W:125:75	TATATTGTTCTCAAAAGTTGTTTGGTATACAAAAGTGCAAGGTTTTTACT	0.214914	53	56
YDL141W:175:125	AAGTATATTTTACTTTCCTTCTCCCTTCGTCAGTTTTTCTTTTGCTGTAA	-0.0554555	436	351
YDL141W:214:164	CCTGTAATTGTTTGCCAAACGTTGGGTAAACGCACATATAAGTATATTTT	-0.298175	162	102
YDL141W:239:189	AGAGCTACGGACTTGGCTTTTTCTTCCTGTAATTGTTTGCCAAACGTTGG	-0.793185	404	155
YDL141W:50:0	TAAAGAAGATATTAGAACGATCTTATCAATATTATCCAATTTCAACTAAT	-0.318727	83	51
YDL141W:75:25	GGTTGTTACAGGTTCAGAGTTCCAATAAAGAAGATATTAGAACGATCTTA	0.160847	0	0
YDL142C:50:0	GAGAAACAAGCAGGCCTGGTAGCATAGTTTGGTCCCTAATAATTTAGTCA	0.0986042	231	217
YDL142C:64:14	GAAAGGAGGCAATTGAGAAACAAGCAGGCCTGGTAGCATAGTTTGGTCCC	-0.241377	153	102
YDL143W:35:0	AAGTGTGCAAGACGGGTAAAGGAGAGTATAGAACG	0.226598	411	439
YDL144C:10:0	AATGTCGAAA	0.11335	4634	4419
YDL145C:125:75	TTCCCTTTACACTTTTGAATAAAAACATTATCATACCTGTTTACAAATTC	0.108004	135	128
YDL145C:175:125	CTTACCCCCTTCTTTGCTTAAGATATAAAGTTTTTTCTTTTTATTTTATC	0.164208	296	297
YDL145C:225:175	GGTAAATCATAGAATTGGCGAAACCAGCAGGATTTTCCAAACATTTGTTA	-0.0717758	52	41
YDL145C:255:205	ACAAACTTGTTTGAAGAGGCATTGCAATTAGGTAAATCATAGAATTGGCG	-0.157607	65	47
YDL145C:50:0	ATACTTTTTTTCTTCTGTAGTGTCTTTGTTCATTTCATTACTGGATCAAG	0.478814	186	256
YDL145C:75:25	GCGGTTTATTTAACCTGAAATCAGTATACTTTTTTTCTTCTGTAGTGTCT	-0.250128	272	180
YDL146W:125:75	TTTAAACAGTGAAATATTTTTTTCATTTAGTAAACAAGAATTAAACTTTG	0.795153	104	197
YDL146W:158:108	CTGAACATTAATTACTACACCTATAGACATATCTTTAAACAGTGAAATAT	0.570995	70	106
YDL146W:183:133	ATTTTTTCGTTTGATTAGCAAAACTCTGAACATTAATTACTACACCTATA	0.297481	361	414
YDL146W:50:0	GTCACTTTAGCCTATACTTTCTTCGAACATTTTTCCTTTCATTTTGACTC	-0.232913	1188	801
YDL146W:75:25	AATATTTTTTTTTCGATTAACTTATGTCACTTTAGCCTATACTTTCTTCG	-0.621096	152	69
YDL147W:50:0	TACTGCTGGGCTCACTACCATTTTTGTTGCTAGAGTAAACGTAGAGAAAG	-0.37815	47	27
YDL148C:30:0	GAGAAGCAAATAAAAGGGAAGATCAAATAC	-0.30197	304	191
YDL149W:45:0	ATTTAAGAACAGCCTGAAATATCAAAATCACGGAATTATTAGGTT	1.25946	0	2
YDL150W:111:61	AATTCAAAAGAGGACAGCTAGAAAGATATTGAGGTATTTATAATTTGCTA	0.49462	52	73
YDL150W:50:0	AGTCGAAGCGTAATCTTGTTTTTTATTAAGCGGGATAGCATTCATTAAGT	0.0399646	201	178
YDL150W:75:25	TTTATAATTTGCTAGACTAACCGAAAGTCGAAGCGTAATCTTGTTTTTTA	-0.655361	189	83
YDL153C:26:0	ATATTAGAGTGGGTGTATAGAATAAT	0.0515396	1071	960
YDL155W:115:65	GCTGCTTGCTTAGAAGAAAAGAAAAGAAAATTGCAGAGAAAAAGCTATTT	0.160847	0	0
YDL155W:140:90	GAAAGAAAACGATCAGAAATTTTTAGCTGCTTGCTTAGAAGAAAAGAAAA	0.135529	39	38
YDL155W:50:0	CGCTTTAAAACATAGAGATATTTTGTCCTTTTTATCATTGCTTATTATAA	-0.0398242	131	107
YDL155W:75:25	AAAGCTATTTATTGTTTCTGTCCTTCGCTTTAAAACATAGAGATATTTTG	0.32441	286	337
YDL156W:50:0	GCGATCTATTTTAGTACGGCAATTAAAAGAAAGCTGCTTTTCAGTCAAGA	0.463657	81	110
YDL156W:69:19	CGTCAATAGTACACAATAGGCGATCTATTTTAGTACGGCAATTAAAAGAA	0.160847	0	0
YDL156W:94:44	AAAAACCCTTTAATCTTGCATTTGTCGTCAATAGTACACAATAGGCGATC	-0.26201	86	56
YDL157C:15:0	AAGTGGTGAAAAACA	0.12927	1125	1090
YDL159W:46:0	ATCGGATCATATCTGTTTTTGCAGCGTGGTATATTGGTTGTTGGTC	-0.328309	1338	820
YDL160C-A:28:0	ATGAGTACAGAGCACAGTAATTGTGGTG	-0.543898	2514	1242
YDL160C:125:75	TCCTAATAGAAAGATAGACGCAGAAAATTCTTACTTTTAGCCCTTTTATT	-0.244619	95	63
YDL160C:175:125	AAGGATTGTACGACAAAACAACAATAATAGTAAATATAGTCATATTTTAT	-0.233808	45	30
YDL160C:225:175	TGTTTCATCCACATTCTTTTAAGACCACAAGCTTAATATTTTCATTCATA	-0.274472	101	65
YDL160C:259:209	TTGTACATTTATTTCTCATCATTGGATTCAGTTTTGTTTCATCCACATTC	-0.638713	633	284
YDL160C:284:234	ATCAATAAAAGTGTTTATTATCTGATTGTACATTTATTTCTCATCATTGG	-0.27852	134	86
YDL160C:50:0	ATAATAACTTATCCCAGGCCTAAAATACGACAAGAAAGAAAATAGTAGTA	0.766982	17	32
YDL160C:75:25	TCTTCATAACCGCATCGCCATTCGCATAATAACTTATCCCAGGCCTAAAA	-0.0154327	197	165
YDL161W:16:0	AAGAGGCAGAACAATC	0.178984	2840	2892
YDL164C:50:0	ATGATTTTGGAGGTTTAGAGCAGCTTTTAACGTCATTGTTCATCAATTAC	-0.653327	385	170
YDL165W:50:0	CAAGGAAAAACAGGAAGAGAAGAGAATCAAAATATACTATTCCCTACATA	0.160847	0	0
YDL165W:62:12	ATGCAAAAACCACAAGGAAAAACAGGAAGAGAAGAGAATCAAAATATACT	0.160847	0	0
YDL166C:50:0	CTCGTAGAAAGGAACTATTAGAAAATAAAGAAATACTTTGTTATATAAAG	0.160847	0	0
YDL166C:54:4	AAGACTCGTAGAAAGGAACTATTAGAAAATAAAGAAATACTTTGTTATAT	0.38399	19	24
YDL167C:43:0	AGGATAATTGTGCATTGCTATTGTGATTTTTGATACAGAAATT	0.453169	214	287
YDL168W:50:0	ACTTCTACAAAATCTCCAAGTAAAGAAGGAATATAAGTAATATAAGTACA	0.160847	0	0
YDL168W:56:6	AAGTTTACTTCTACAAAATCTCCAAGTAAAGAAGGAATATAAGTAATATA	0.310378	30	35
YDL170W:28:0	AAGAAAACAAAGTTTTTTAAAGTGAGGT	0.147272	444	438
YDL171C:125:75	TATTTATTTATTTTTCTGCTTCAGTTTTTTTTTATTTATTTTTGTCTTTC	-0.138957	165	122
YDL171C:175:125	TCTTTCTTCCCCTTCTTTTAGCTCATTGAGGTAGTGATTAACGTTTAACT	0.0927931	75	70
YDL171C:225:175	GGAAATTGCTATCTCAGTCCTATACTACGCAGACGGATACTCTCAGTTGC	-0.160407	312	226
YDL171C:256:206	AAACTAATCGTCTCCACATCATAGGAAGATAGGAAATTGCTATCTCAGTC	0.502363	112	158
YDL171C:50:0	TTGCCATTTATTTATTTTGAAGAACTAGAAAAAGAATTAGAAAAGAAAGC	1.30598	20	65
YDL171C:75:25	TACTCTCTCTTTTTTCTTAATCTATTTGCCATTTATTTATTTTGAAGAAC	0.0981955	246	231
YDL173W:49:0	AAAAGCAGCAGCAGCGTTAGCAGCAGCAGTAGCGTAAGACCAAGTTAGT	-0.485048	123	64
YDL174C:102:52	GTGTGTGTGTGTGGGCTGGAAAGATTTCTTGAGCTTCCGTGTTATAGTGC	-0.882503	527	185
YDL174C:50:0	TTTAAATATTGTACATCATTCCGATCCAGCTGGAAACAAAAGCAAGAACA	0.160847	0	0
YDL174C:75:25	CTTGAGCTTCCGTGTTATAGTGCAATTTAAATATTGTACATCATTCCGAT	-0.172198	232	166
YDL175C:24:0	AGCTTACATCACTTCCTCGCAGTC	0.235353	7885	8495
YDL176W:101:51	GGCATCTAATAGAACAAAACCAGGTTAAGATAGGTTTTACTTTGAGTTGT	-0.593859	133	62
YDL176W:126:76	AAATATACCTTCCCCATAGTTGAATGGCATCTAATAGAACAAAACCAGGT	-1.08437	131	37
YDL176W:50:0	AAATACACGCAGAAAGCGTCTTTCCACATAATCTGAACATTTTGTTATCG	-0.00345654	263	223
YDL176W:75:25	AAGATAGGTTTTACTTTGAGTTGTTAAATACACGCAGAAAGCGTCTTTCC	-0.329776	48	29
YDL177C:50:0	ACAGATTCTTAGATAGGTATTGATGTTTGGTATTACTATTTTTTGGAGAA	-0.7022	127	53
YDL177C:52:2	ATACAGATTCTTAGATAGGTATTGATGTTTGGTATTACTATTTTTTGGAG	-1.11681	182	50
YDL178W:17:0	AAGTGGCATATAACAAG	0.451573	2459	3289
YDL179W:50:0	ACTTGTTTCGGTAACAGCATTATTAATTCTGAAGAAATACGCACAAAGAG	-0.0662109	63	50
YDL179W:70:20	CGCAAAGAAAGGACAAGAAAACTTGTTTCGGTAACAGCATTATTAATTCT	-0.0523467	124	100
YDL179W:95:45	AATAACATATATTTAAGTGGATATACGCAAAGAAAGGACAAGAAAACTTG	0.160847	0	0
YDL180W:101:51	CATCTCTTCGCATTCAAAATTTCTCTTCCATTCTTTGACGTTTTAAATCA	-0.457559	450	242
YDL180W:126:76	AGCCTAACACCAAGAATATACTTAGCATCTCTTCGCATTCAAAATTTCTC	-0.0948063	296	229
YDL180W:50:0	ACCTCGTATTCTTTACACAAAAGAAAGATACCTGTGAAATATATCTGAAT	-0.298686	18	11
YDL180W:75:25	TCCATTCTTTGACGTTTTAAATCATACCTCGTATTCTTTACACAAAAGAA	0.122625	159	153
YDL181W:125:75	CTTGTTGTATCTTGTTTAAAACTTTCTTTGAATTTGTTCGTGGTTGAATT	-0.59652	626	293
YDL181W:163:113	GTTAACAATCGTTAGAGAAGGAGGGGTTCATAACTTGACTTGTTGTATCT	-0.910737	291	99
YDL181W:50:0	ATTTTACACGCATTACTACAGCACACTTTTATACAGTTCCACAATAGAAT	0.249974	117	128
YDL181W:75:25	TGTTTTTGCTATCCCAAAGGAGTGCATTTTACACGCATTACTACAGCACA	0.351902	18	22
YDL182W:26:0	AAGGACCCTGTATTGTTTTCCTAAAG	0.177479	1907	1939
YDL183C:50:0	ATCATTTTATCACAATACCAAAACTTCATCCGGTGTATTTTAGATTAAAG	-0.048874	36	29
YDL183C:74:24	ATATCATTGCTCTTCATCGATAGAATCATTTTATCACAATACCAAAACTT	0.118882	72	69
YDL184C:22:0	AGACCACATCGATTCAATCGAA	0.603168	3506	5457
YDL185W:50:0	TCGTTCTTTCATTCTTAGAGTTAAAAAGCAAATAGAGAAGAAAAGAAACA	1.00814	11	27
YDL185W:73:23	TATCTAAGATTATAACGCAGGAGTCGTTCTTTCATTCTTAGAGTTAAAAA	0.355003	13	16
YDL185W:98:48	AAACACATTTCTCAAAGCATATAGATATCTAAGATTATAACGCAGGAGTC	0.290058	28	32
YDL188C:125:75	CACGCAAACCCGTTTACTTCTTGTCCTACCTGCTCTCTTTCCTTTCCGGT	-0.520142	1961	992
YDL188C:157:107	CAGCCCGCTGCAAAACAGTGTTCGAACAAGAACACGCAAACCCGTTTACT	-0.347034	112	67
YDL188C:182:132	AACTAGAGCAAACTTCTTAAGGTACCAGCCCGCTGCAAAACAGTGTTCGA	-0.122152	141	106
YDL188C:50:0	GAATTTTATATTATTGGCACTTCTGTATAACTGGCTTTCATTCGAAAAAA	-0.433861	57	31
YDL188C:75:25	TATTGTTCCTGTTACGTCTTTTTTTGAATTTTATATTATTGGCACTTCTG	-0.452724	494	267
YDL189W:125:75	TGCATCTTATAATGGGCGCACGATTTATTTTATTTTAATTAATTTTTTAG	-0.909595	69	23
YDL189W:165:115	ATATTGTACCAGCAAGCCGTGGTGACAGTATGTTGAAACGTGCATCTTAT	0.0222604	84	73
YDL189W:190:140	AAGTTTTGGCGTAGGCAATTGAGCCATATTGTACCAGCAAGCCGTGGTGA	-0.308671	410	256
YDL189W:50:0	AGATATTCAAGTCTCTTCAAGTATATAAGGAGTTAGGGCAGAAGTAGGTG	-0.101518	142	109
YDL189W:75:25	TTATTTCGTATCGTACTAACAACTAAGATATTCAAGTCTCTTCAAGTATA	0.80015	247	469
YDL190C:125:75	TGTTGCCACAGTAAACGTTAATTATATCTTTGAGAATTGTGTCAGCCAAT	-0.327251	289	177
YDL190C:170:120	TAAGTAATTGCCATTTTATTCACATTTTTAGACTCAACCACTTGCTGTTG	-0.233146	389	262
YDL190C:195:145	GTACGCCGCAATCATTGTTAATCATTAAGTAATTGCCATTTTATTCACAT	0.135094	117	114
YDL190C:50:0	GTTTAAGGGGAAAAGTTAACTTTGAAAGTAGAACCCTCATTCCATAGATC	0.0181902	172	149
YDL190C:75:25	AGAAAGGTAAAGTTGACCACAAGTTGTTTAAGGGGAAAAGTTAACTTTGA	0.110131	181	172
YDL191W:50:0	TAGCACTATTATTGACCGTAGAATAGGTACAGTGAGACAGTATATTCGAA	-0.126836	23	17
YDL191W:59:9	GCTGTCGATTAGCACTATTATTGACCGTAGAATAGGTACAGTGAGACAGT	0.324507	612	721
YDL192W:37:0	ATAAGAAAGAACTCAAACAGGTTTAATAGAATTAAAA	0.269327	95	106
YDL193W:50:0	ATTTTTTGATACAATATATATACATATATTTTCCCCATTGTTTTTCTTAG	0.255256	201	221
YDL193W:67:17	AGTTGGCAAATTACACAATTTTTTGATACAATATATATACATATATTTTC	0.0407022	158	140
YDL194W:125:75	GAAGAAAAACAGAGAGAGTCACTATAAGTTGACCTCACTATAGAAATTAA	0.448529	53	71
YDL194W:175:125	ATAGTACTTACACATCGAGAGATCATAGGACAGATAAGAAGCATTTTATT	-0.223565	46	31
YDL194W:204:154	AATAGTCCTATCCTCGGCAAATTGCATTGATAGTACTTACACATCGAGAG	0.28714	51	58
YDL194W:50:0	TTTTAAACAGAAGGATATGCCTTTGTTGGCATAGAAAGAAGAATTTATAA	-0.441787	94	51
YDL194W:75:25	AACAGAAAAGTTTTACTGAGGACCTTTTTAAACAGAAGGATATGCCTTTG	0.847802	80	160
YDL195W:119:69	AGCACTATTTCGCTACTGTAGGTGTAGAACATTAGGACAAGGCAAGCTTC	0.134871	77	75
YDL195W:50:0	ACACATATTTCCCTTTGTTCCCGTTTGCTCTCCCTAATTGAACAATAAAG	-0.0966647	184	142
YDL195W:75:25	AGCTTCTGCGATAGACACTTTACTCACACATATTTCCCTTTGTTCCCGTT	-0.200602	899	626
YDL197C:14:0	AAGACTGAGTGCTT	-0.341113	6587	3987
YDL198C:105:55	ATATAGAGGTGACTATATAAATCGTGTATCTCTTTTGATGGTTAATATTT	-0.589459	107	50
YDL198C:50:0	TTAGACATATATCAAACAAAGCATCTTCCAAAGTATTAGAAAAGGGAAAT	-0.686451	41	17
YDL198C:75:25	TCTTTTGATGGTTAATATTTAGCCTTTAGACATATATCAAACAAAGCATC	0.377587	375	466
YDL200C:36:0	GAAAACGGTCGCATTTTTGATCTAAATGGACCAACG	-0.65801	854	376
YDL201W:50:0	TAGATTCAGCAGTTCCCATAGGATAAAATTTTCAAGCGTTTATTGTTAAG	0.354431	102	124
YDL201W:68:18	ACAAAAGCTGGATTAGTATAGATTCAGCAGTTCCCATAGGATAAAATTTT	-0.344702	62	37
YDL202W:50:0	AGCTTTAGACCTTATTGGAAGTGCTTGGGCGCGGAGTGTGATTATAAATA	-0.0462967	154	125
YDL202W:54:4	CAAAAGCTTTAGACCTTATTGGAAGTGCTTGGGCGCGGAGTGTGATTATA	-0.269423	448	291
YDL203C:125:75	GACTGGATTTGGAAGCGTCTCTTTTTATGAAGTAGATTTTAACTCCGTTT	-0.881413	206	72
YDL203C:174:124	CCGGTAATTTAATTTGAGTTGCTCAAATTATATACAAGAACGTGGTAGAG	0.853994	17	35
YDL203C:199:149	ATGGCTTGTAGAATAAGCAGATATCCCGGTAATTTAATTTGAGTTGCTCA	-0.589459	107	50
YDL203C:50:0	GTACAGAGTGTACCACCACGTTTTAATACTTTGTTTTAATACAGTAGGCA	0.636692	127	205
YDL203C:75:25	TCTTTTCATTTCCTTCTATTCTTTTGTACAGAGTGTACCACCACGTTTTA	-0.388513	387	223
YDL205C:125:75	TACAGGGCTGTATTAGATTTTGAATATTCTGTTCTTCTCATCCCGTATTA	-0.417966	354	198
YDL205C:172:122	AGCCTGAATTCAAGGTCATTGGCAGATTGACGCTCGTGTTTGCATGGTAC	-0.755444	4	1
YDL205C:197:147	AACTATCTGTATTATTGCTACACATAGCCTGAATTCAAGGTCATTGGCAG	-0.937766	2	0
YDL205C:50:0	AAAGCGAAGAAAATCTAGATAAATTTGTAGTTGGTAAATACACACGTACT	-0.386589	101	58
YDL205C:75:25	ATATCTAGAACAATAGAAAAAAAGAAAAGCGAAGAAAATCTAGATAAATT	0.160847	0	0
YDL206W:125:75	GACATTTGAACTACCGCTCATAATATCTTATTCGATCAAGCAGAATATTC	-0.0964884	118	91
YDL206W:162:112	AAGACAATCTCCCACTCAAATATACGTACGTGAAATTGACATTTGAACTA	0.428488	188	246
YDL206W:50:0	TACCTTTATTTGTAAATGCTACTCTTCATTTATCAAATTTTTTAAAGCAG	-0.200523	121	84
YDL206W:75:25	ATTCTTTTTCCGGCGCCTATCTCCTTACCTTTATTTGTAAATGCTACTCT	-0.783413	706	274
YDL207W:38:0	GCGGGCCGTTGCTACAGGATATTCTGCAGAGTCGAAGA	-0.426319	965	536
YDL208W:45:0	AATGGATCATTGGGTAGCAGAGAAACGGAAACAAGTGCAGTAAAA	-0.937766	65	21
YDL209C:22:0	ATACGCATTGATAGAAATTTGG	-0.557089	2613	1274
YDL211C:33:0	TCTTGATAATTCTTTCTATTGCGATACTTCGCC	-0.341024	5891	3566
YDL212W:47:0	ATTGGACTACAGAGCATAAAATCCCGTGATACGATAAAACTCTAACG	0.160847	0	0
YDL213C:9:0	ACAGCTAAA	-0.136695	5571	4137
YDL215C:125:75	TATAAGAACAACCGGTTTCTAAAAAATACATTACCTTTTGGTATAATCCT	0.256157	39	43
YDL215C:163:113	GTTTACTCATTGCTGCTGTTTAGTCAGAATTCTTGTTATATAAGAACAAC	-0.937766	2	0
YDL215C:188:138	ACTGTCGACATCAACACTGACAAGCGTTTACTCATTGCTGCTGTTTAGTC	0.339681	382	457
YDL215C:50:0	AAACATACAAAACAAGGATATTAAATTCACAACAATAAAAAGAATAAAGA	0.160847	0	0
YDL215C:75:25	TTTTGTGATTGTCACGATCTCAACAAAACATACAAAACAAGGATATTAAA	1.28108	60	186
YDL217C:125:75	CCGAAGCTTTTCAGGACAAAATACTATTTTTCTGTCACTACTAAACGGGA	-0.249302	106	70
YDL217C:160:110	AGCATTTCCTCGGATCCATTTCGTACATATAAAATCCGAAGCTTTTCAGG	0.305428	359	415
YDL217C:50:0	AGCTGCCAAATAAGATCAAGAAATTGTGATTTTAAATACTTTATACGAAG	0.192099	62	64
YDL217C:75:25	TAGTACTAAACGGGATAGTAGAGATAGCTGCCAAATAAGATCAAGAAATT	0.59806	61	95
YDL219W:26:0	ACATATTATTCAGCAGCGGATTTACA	0.0700206	1957	1787
YDL220C:24:0	GACCGTGGAAACTATCGCCTAAAA	-0.0914684	1999	1553
YDL225W:50:0	AAGAGCCCCAAAGATCTGCTTATAATTGCTAGAAAAATATATTATTAATC	0.845483	117	233
YDL226C:23:0	AATTTTATCGCGGATTATAGAGC	-0.110496	1901	1449
YDL227C:39:0	ATCCTCATAAGCAGCAATCAATTCTATCTATACTTTAAA	0.602205	300	467
YDL229W:30:0	AAGATCATTACAGTATTTTAATTGAACAAA	0.631963	785	1258
YDL230W:26:0	GTTAGTAGTAGTTTGCGACAGTGGAG	-0.388918	2600	1500
YDL231C:111:61	GAGTTTAAGCGTCACTAACACTTTAATCAATTTAAAGTTCATTTTTAACT	0.0336913	133	117
YDL231C:50:0	CCACTAAGGAAAGCATGTACAGTATAGTGCTGGAATTGTAACAGGTCCTC	-0.800565	135	51
YDL231C:75:25	GTTCATTTTTAACTTGCTTTGTGCTCCACTAAGGAAAGCATGTACAGTAT	-0.870514	114	40
YDL232W:19:0	AGTACAGAGCAAGCAAAAG	0.757786	1727	3138
YDL233W:23:0	GAAAAGCAAAGATTATCTGCAAT	0.66558	1909	3163
YDL234C:112:62	TAAATTGGTCAGATATAAATCAATTTATCGTGCTCAAATATACTATTCAG	0.4793	47	65
YDL234C:137:87	GCAAGAAATAGTTAAGAACTTTCCATAAATTGGTCAGATATAAATCAATT	0.586931	31	48
YDL234C:50:0	AGGTTGCACAAATTGGCAAAGTTCTACAAGAGTCATTCATACATCCCCTG	0.178238	56	57
YDL234C:75:25	ATATACTATTCAGTTTCTCAGATATAGGTTGCACAAATTGGCAAAGTTCT	-0.290229	156	99
YDL235C:123:73	GGGTTGGTCGATAGTTGTGCTCTGGATCATTGATAACCACTGACGTGTAA	-0.605912	154	71
YDL235C:50:0	CAAAAGAAATAACAACACTCGTTCTCGGAAACAAGAAAATACACACAATA	0.928605	70	152
YDL235C:75:25	AATAGTTTTATTTCTTTGAAAAATTCAAAAGAAATAACAACACTCGTTCT	0.486269	64	89
YDL236W:37:0	ATAGCTTGCCCTGACAAAGAATATACAACTCGGGAAA	0.0797506	474	437
YDL237W:32:0	AACAAAGATAAGTACCTCGGTTTAGTTAAGCG	0.293035	1117	1275
YDL238C:28:0	ATGAATTGGGCTGTCCTTTGAAGAGGAT	-0.923873	1786	603
YDL240W:125:75	AGTATCCGTCTTTGCCTTAACATTGTTATTTGGCCTTTATCCCAGATATA	0.0818339	565	522
YDL240W:172:122	AAGGCTGTTCTTGCTAGAAACCAGCAATTGGGCTTCTCATTCAAAACAGT	-0.23573	167	112
YDL240W:50:0	AGAAAAAAAGAGCAGACAAATTATCAAACAACAAGTACCGGAGGTGAGCA	0.63085	4	7
YDL240W:75:25	CGCAACCGTATTTATTCAAATCCAAAGAAAAAAAGAGCAGACAAATTATC	0.475928	53	73
YDL241W:50:0	GCGATTTTTGCATCACACCCAAGAAAAATCTATAATAGAGACACAAAAAA	0.275257	65	73
YDL241W:57:7	CCTATCAGCGATTTTTGCATCACACCCAAGAAAAATCTATAATAGAGACA	0.308767	68	79
YDL241W:82:32	ATATATATATTCCTTTATTATAATTCCTATCAGCGATTTTTGCATCACAC	0.589842	111	171
YDL244W:125:75	CAAACAAAACATATAAAAACCTCGTATTATCATCTTCATGAACAATATTC	-0.960494	88	28
YDL244W:175:125	AATGGTGCTGTTATAGCAAAATAAGCAACATCAATCTCTTGTGACGACAG	-1.22545	23	5
YDL244W:225:175	ATTATTCAACTAGCAGAAGGCTTGAAATATTACTTATCCAGGTTATGTAA	0.160847	0	0
YDL244W:264:214	AATTCGAATTGGATGGCTTATGAACTATGAAATATACGAATTATTCAACT	-0.18543	40	28
YDL244W:50:0	TTTTCAATTATATAAAAATACCACAACAACAATACACATACTTCCAAGCT	0.160847	0	0
YDL244W:75:25	TTGTCCATTCTTTCGTTCTTTTACCTTTTCAATTATATAAAAATACCACA	0.623088	96	153
YDL248W:10:0_YHL048W:10:0	ACTACCGAAA	0.0177585	11970	10374
YDR001C:50:0	AGAACGCCTGATAAACAAAAAAAGAAAAATTAACAAAAAAAATCAGTAGA	0.160847	0	0
YDR001C:69:19	AAGGAGATTACTAGATACAAGAACGCCTGATAAACAAAAAAAGAAAAATT	0.160847	0	0
YDR002W:50:0	TGTTTAATTTGAAATAAAAGCAAGAAGATAAACACAACTATAGAAAAAGA	0.160847	0	0
YDR002W:55:5	GATCTTGTTTAATTTGAAATAAAAGCAAGAAGATAAACACAACTATAGAA	0.160847	0	0
YDR003W:118:68	GAGAATCGAATACTATAGAAATTTTTGACGTAATAAAGGAGCAGTAAATT	0.160847	0	0
YDR003W:50:0	TCGCTAGAAAGCTGAAGGAAATTTAGCTAAACAGAGAGTATAGTTTTGAA	0.160847	0	0
YDR003W:75:25	GTAAATTTGGAATACATTCCTTAGCTCGCTAGAAAGCTGAAGGAAATTTA	1.25946	2	8
YDR005C:117:67	GAAAAATATAGGCTTAGTGTCATTTACTTAAAGTTTAGAAACTCTGCACA	0.466782	94	128
YDR005C:50:0	TTAACCGCTCATTACTCCAAACGGATTTTTTTGCCTAAAGAATCACGACA	0.274175	49	55
YDR005C:75:25	TCTGCACACTTCACCAAGAACAAGTTTAACCGCTCATTACTCCAAACGGA	0.217359	171	181
YDR006C:125:75	TCTCTTTCTTATAACTACCATTACTCAGTGTTGAGAGATTGGTAGAAATA	0.415081	37	48
YDR006C:50:0	TATTTTCAGCCAGTAATATTCCCTACTCCTCTTCCGTTTTCAGAATAGAG	-0.115285	372	282
YDR006C:75:25	TACGCGTATACGTTCATTCAAGACTTATTTTCAGCCAGTAATATTCCCTA	0.228199	243	260
YDR007W:34:0	ATACGTGATTAAGCACACAAAGGCAGCTTGGAGT	0.488639	1123	1559
YDR011W:125:75	GAGAAAACGAAGGTATAGCGGACGTACCCGCAGAGACATAAAAAAAGAAA	0.123106	26	25
YDR011W:175:125	CTTCAACATTGATTATTTTCTCCTTCCATTGATTAGAGTTCAAGCTCCCT	-0.478745	308	162
YDR011W:225:175	ATAGGAGTTACTATATCACCAGTGCATTACATTCTCAGTGCATCCATCGT	-0.258605	323	212
YDR011W:275:225	TTCAAGTTGAAGTGTTGCGAGGTCAAAAAAAAAAAAGCTCACTGTAGGAT	0.160847	0	0
YDR011W:321:271	AACGAAAACAATATATACGAACCTAGTGTATTTGTATCTTTTGTTTTTCA	0.0538744	68	61
YDR011W:50:0	AAAAAAGTGGATAGAATAACACAGCTACCAAAATACGTAAAGAGAATTCA	0.160847	0	0
YDR011W:75:25	AACTATATCGAAGACCGAAAGCAGTAAAAAAGTGGATAGAATAACACAGC	-0.837682	18	6
YDR012W:32:0	ATAGTCATTTACTAGGGTATATACCAATAATA	0.295918	891	1020
YDR013W:16:0	ATGCTCACAGAGAATC	-0.511131	5374	2744
YDR014W-A:6:0	AAGACG	-0.0183685	9641	8059
YDR016C:33:0	GAAGAGCTCGGACGTGTGAGGATATATGTACAT	-0.382158	999	580
YDR017C:14:0	AAAGCTAAAAGACT	0.135698	1811	1766
YDR018C:50:0	GAAATGAACAAACAACCCTACGTACGACTGTGTTTTGCAGTTTAAGAAGG	-0.669502	272	118
YDR018C:68:18	TGTCCGTCGAAGGTTAAAGAAATGAACAAACAACCCTACGTACGACTGTG	-0.49308	99	51
YDR020C:104:54	TAATTCAATTTATCTGTACATTTTTCCTAGAGCATACCACAAGGGAAATC	0.0232251	69	60
YDR020C:129:79	ATGGATTGTACGCTGCCATCACGGATAATTCAATTTATCTGTACATTTTT	-0.699629	661	279
YDR020C:50:0	TTAATTTTCGTTTCCTGCATTAACAATTAGCGAGATAAATATTACAGGAA	0.659838	84	139
YDR020C:75:25	GAGCATACCACAAGGGAAATCGTTTTTAATTTTCGTTTCCTGCATTAACA	0.0461376	202	180
YDR021W:107:57	ATACACAAATTTTAATATAAAAGGGCCACCACTCCTTCAAGAGGTATAAA	0.835975	27	54
YDR021W:50:0	TCACTCAAATAAAATAGACCGTACAGAAACAAAAAAAAAACTCATTAGAC	0.160847	0	0
YDR021W:75:25	TCCTTCAAGAGGTATAAAAATTTGTTCACTCAAATAAAATAGACCGTACA	0.715843	30	53
YDR022C:28:0	TAAACATTGCTGAAATCTGCGAACAGGA	0.0175332	1085	940
YDR023W:34:0	GTGAACTGGCACAAGGAAAAGCGTGTAATTAAAA	0.592327	429	661
YDR025W:14:0	AAGCAACCAGCAAG	0.640018	4383	7078
YDR026C:118:68	CTCATCTCCTGTAATTTCCAACATAGCATCGTTCACGACACAGTTGGCGC	-0.705013	289	121
YDR026C:143:93	AAGTATCTCGTCAGTTGCTTTACAACTCATCTCCTGTAATTTCCAACATA	-0.330161	432	264
YDR026C:50:0	AGAGCAAGCAGCCGTTTCTTGTCTGCGTCAAGAAGAAAGATAAAGGTAGA	0.538141	71	104
YDR026C:75:25	TTGGCGCTGAACAAATTTTGTGCATAGAGCAAGCAGCCGTTTCTTGTCTG	-0.33901	271	164
YDR027C:117:67	ACGACACGGCTTGTTTTAGGCACAACTTTGTTTTAGGCAGAGCTTACAGT	-0.0743454	500	395
YDR027C:50:0	TCCTAAAGCAGTATTAAAACAATTTAAAGGTTTGGTGAGGTATCTGGCCA	-0.0333095	16	13
YDR027C:75:25	CTTACAGTAATTGGCAGTATTGATATCCTAAAGCAGTATTAAAACAATTT	-0.139258	26	19
YDR028C:125:75	ACCACACACCTGGTGTTCTGTACGAACGTTGAAAAGTCAAAGCAAGGGGG	-0.169111	152	109
YDR028C:175:125	AATTGGTATACTAGTTTTACGAGGGCTAGCTTTTGGCTGTTATACGTATA	-0.295066	1056	669
YDR028C:225:175	CTCATCTTTATCTCTCTTATTTTTTTAACACCACCTCCTGAAAGAGAACT	-0.00345654	164	139
YDR028C:275:225	AGTTAGTATTCTTTTTATCGTTCATCAGCTCTATCAAGATATAATATTTG	0.478255	173	238
YDR028C:325:275	GAAAGGGTTATCGCTGAAATTTAAATAGAAAGAGAAAATATCACAACTAG	0.160847	0	0
YDR028C:375:325	AAACAGGAGAATATACCATATAGGAGACGCGATTTCAAACGAAAGCTTGA	-0.858392	229	82
YDR028C:425:375	ACTTTTGTTTGAATACCCCTATCAGGTCTTTTAAGGAATAAAAAAGGAGA	-0.532301	57	28
YDR028C:455:405	GCCATAAAAGAAGAATAGACAAATATAAATACTTTTGTTTGAATACCCCT	-0.0578427	55	44
YDR028C:480:430	GCAAGACAGAACAGGAGAACAAGAAGCCATAAAAGAAGAATAGACAAATA	0.160847	0	0
YDR028C:50:0	AAATCCTAAAGCAAGCATATTGACGAAGACGAGATAAGAAAAATCCAAAA	0.160847	0	0
YDR028C:75:25	AAAAGATAATATCCTTGAAGATTATAAATCCTAAAGCAAGCATATTGACG	0.160847	0	0
YDR030C:8:0	ACAGGTCA	-0.102603	10327	7935
YDR031W:7:0	GAAGAAG	-0.167431	9576	6896
YDR032C:50:0	ATTCAATAAATCATCACCACTCTCTAGTTAAAAGAATCCAATTATATACA	0.267227	97	108
YDR032C:69:19	AAATATCGTCGAATAATATATTCAATAAATCATCACCACTCTCTAGTTAA	0.160847	0	0
YDR033W:125:75	CTCTACATCCAATTTTTTGACCCTATTTTAACATTAATTTTTTGCTTTAA	0.111366	144	137
YDR033W:175:125	AAAAAAGTTTCCTCGAACAAAAATATTATTATTTCAATAACTTTTTCTTT	0.327901	109	129
YDR033W:221:171	AAGAAACATTGCGAAGAAAAAGAATAATAAAAGAAACTCAGAAAAAAAAA	0.160847	0	0
YDR033W:246:196	GTCACTATCTTTTGTCCTTATTGTTAAGAAACATTGCGAAGAAAAAGAAT	0.833791	24	48
YDR033W:50:0	AATATCTAATCATCTTCCTTTAACCCACAGAACAAAGAAGAAAAATAACA	-0.398769	27	15
YDR033W:75:25	TTTTAACTAATACCTAATTTCACTTAATATCTAATCATCTTCCTTTAACC	0.31881	373	437
YDR034C-A:125:75	CATTATCATCTATGATAATTGTGCGGATTCTGATGTAATTGTTGGGATTC	-0.937766	278	92
YDR034C-A:175:125	CTCTTCTTTACAGAAATACAAAAGGCATGCTGATTGTTGGAATAAAAATC	-0.283085	52	33
YDR034C-A:214:164	ATCAATCCTAAATTTGATATTGACTTAGGTTATGGTTTACTCTTCTTTAC	-0.552103	356	174
YDR034C-A:50:0	GGTATGTAGATATACTAGAAGTTCTCCTCCAGGATATAGGAATCCCCATA	-0.165675	139	100
YDR034C-A:75:25	CATTTTTAATAAGGCAATAATATTAGGTATGTAGATATACTAGAAGTTCT	-0.987246	144	45
YDR034C:114:64	CGTAGCTACAGGAATTGCTGTGAACGTTGCTAGATAAATTTTCCTTTTTA	-0.0356597	425	349
YDR034C:139:89	AAGAAAAGCCCAGCAGAGGTCATCACGTAGCTACAGGAATTGCTGTGAAC	0.351902	56	68
YDR034C:50:0	GTTTCTTCCTTCTCTCATCATTTTGGTATAAGATCTGTTTTCTGGCAATA	-0.394771	311	178
YDR034C:75:25	TTTCCTTTTTAGTCCTTATCTCCCTGTTTCTTCCTTCTCTCATCATTTTG	-0.907965	561	192
YDR034W-B:40:0	CTAATTGTCAACTAAAAAAGTCTAAGTTAGCAATACCAAA	0.556742	34	51
YDR035W:29:0	ATTACGTTACAAGAACACTTTATAGCATT	0.510888	846	1201
YDR036C:50:0	CGGGAATCCTCATTTATATAATACTTGGTTCTGTTTAGCCACCACAAATA	0.0359732	229	202
YDR036C:53:3	GTACGGGAATCCTCATTTATATAATACTTGGTTCTGTTTAGCCACCACAA	-0.110962	499	380
YDR037W:30:0	GAGAAATCCGTAATAAACTTCAATAGCATA	-0.291357	3273	2082
YDR038C:107:57	GAGAATACGTTAACCAAATCAACGTTATTCATATTCGTATTTTGCTTATC	-0.0644001	356	284
YDR038C:50:0_YDR039C:50:0	GTATGTACTCACTGAGGAAAAATCTTTGTACACATAATTGAAAATTTTCG	-0.194357	290	203
YDR038C:75:25	ATTCGTATTTTGCTTATCAGATAACGTATGTACTCACTGAGGAAAAATCT	-0.398769	13	7
YDR039C:71:21	GTATTTTGCTTATCAGATAACGTATGTACTCACTGAGGAAAAATCTTTGT	-0.349979	44	26
YDR039C:96:46	AACCAAATCAACGTTATTCATATTCGTATTTTGCTTATCAGATAACGTAT	-0.254471	152	100
YDR040C:125:75	ACTTTAATAAAGCAGATATCTTCATCAAGTGAACTGTTCACACTTAATTC	0.0551264	308	277
YDR040C:175:125	ATCTTTCTTTTCTCATTAGTAATAGTCTAATCATTTATATTCTAATATTA	-0.0803155	41	32
YDR040C:225:175	TTATTCCGTTCTTTCTTTTTAGAGTACTATTAATTTCTACTATTTCTCCT	-0.257055	444	292
YDR040C:275:225	ATATATATACCTAAGGGAAACAATTTGAATAGATAAAAGGTCTTTTCCTC	0.715843	30	53
YDR040C:325:275	GTCATTTACATAGATATATACAGGGAAAATATATATATATATATATATAT	0.160847	0	0
YDR040C:375:325	GGTGGGTTGTGGTCAAACCCGGGGTAGGTTTTAAAATGTCATGCGTTTTC	-0.647325	542	241
YDR040C:420:370	TTATTGCCTCTTTCCTTGGTGGGTGCGGGTTAATATTAGATGAACGGTGG	-0.992387	300	94
YDR040C:445:395	AAGGTCTTAGAGCAGTATTCCCGAATTATTGCCTCTTTCCTTGGTGGGTG	-0.599959	320	149
YDR040C:50:0	ATATTTACTAATTAAAGAAAAAACTTCGTACACAGAATTGAAAATTTTCG	0.706763	83	144
YDR040C:75:25	ACATTTATTTGAGGCAACAATACGTATATTTACTAATTAAAGAAAAAACT	-1.09941	66	18
YDR041W:8:0	ATTGGCCA	-0.282874	11842	7598
YDR042C:50:0	CTAACAAACGACTAGGTCTCTAAGAGAAAAAATCTTTTTCTTTTCACAAC	0.186555	191	196
YDR042C:75:25	ATTGAAAATAGCGAATCAACAACAGCTAACAAACGACTAGGTCTCTAAGA	0.160847	0	0
YDR043C:125:75	ATACGATTCTGCAAAGTATTATTGTACTGTAATTCCTACCATTACGGCGC	-0.248938	231	153
YDR043C:175:125	TTGATGCTATAAGGGAATTCTGCAGCTTTTGAAAGTAAAAATCATATCGT	0.160847	0	0
YDR043C:202:152	ATATTACTCCACCTCGTTTACAGTTTTTTGATGCTATAAGGGAATTCTGC	-0.532301	1	0
YDR043C:50:0	GATTGTTCCTCTCGACCAGCATATTACTACCCTTCGCAAACTTTCAGGCA	-0.237314	340	228
YDR043C:75:25	CTTTTTCTACCATTCACCTTTCTTGGATTGTTCCTCTCGACCAGCATATT	-0.602918	791	368
YDR044W:125:75	TATTGTCTTTCTTTGTTAAGCTTTTATTCTCCGGGTTTTCTTTTTTTGAG	-0.535791	286	142
YDR044W:50:0	ATCAAACATAGCAAACCGAACTCTTCGAACACAATTAAATACACATAAAG	0.34515	83	100
YDR044W:75:25	CATATCAAAAGCTTTCTTTTCGCAAATCAAACATAGCAAACCGAACTCTT	0.400717	165	210
YDR045C:125:75	CAGTAGGAAAAGTTTTATCCAAAAGCATAACCGAGAATCTTCTTTCTGGA	-0.478233	107	56
YDR045C:155:105	GATATAAAATTCAAATCCAGTTCAAAAGAACAGTAGGAAAAGTTTTATCC	-0.844675	40	14
YDR045C:50:0	AAGCAAAAGAGTTCGCATTCATTGGTAAAACGTAAAATACATAATTTAGG	0.160847	0	0
YDR045C:75:25	AAACGCATACGTTATATGGCTATATAAGCAAAAGAGTTCGCATTCATTGG	-0.575786	187	89
YDR046C:50:0	GATTGGCGAAGTAAGATATTGTTTCTTAATATTTTCTTTCCCCTAAGGTA	-0.215389	117	80
YDR046C:65:15	TGGTTACTATTGATGGATTGGCGAAGTAAGATATTGTTTCTTAATATTTT	-0.776498	119	46
YDR046C:90:40	ATTAAAAACTACGTTGTAATTAGCGTGGTTACTATTGATGGATTGGCGAA	-0.222146	43	29
YDR047W:124:74	ATAGAGTGATCGATAGGTTCTTCAATTCATCAAGCATTATCTCAGAATTG	-1.22545	15	3
YDR047W:50:0	AAGGAAGAACAAAAAAAAAAAAAATAAAGCAAAGAACAGGTTATAACGCT	-0.218643	18	12
YDR047W:75:25	GTGTTTGGTAAGCTCTCTTCGAGAAAAGGAAGAACAAAAAAAAAAAAAAT	0.4793	31	43
YDR049W:26:0	ACGCCTGTTGACAAGCTTCCAATAGC	-0.305115	3653	2292
YDR050C:30:0	AACTACAAAAAACACATACATAAACTAAAA	0.412811	512	659
YDR051C:46:0	ACGCTACAGCATTCCATTTGAATAACTCAGAGTATTAGTAAAAGAA	0.160847	0	0
YDR052C:125:75	CCAGGTGTAGATTCCTTTAGATCTGAATTCGCTTGCAGGGCTAGTTATCT	-1.22545	3	0
YDR052C:155:105	CAAAAATCAAGTTGCATAGTCTATACTCAGCCAGGTGTAGATTCCTTTAG	-0.108143	317	242
YDR052C:50:0	AGGCATTTGGAATTCTGCTTTTGGTTCATATTTAGAAAAGAAAGAAGAAA	0.160847	0	0
YDR052C:75:25	TCAGAATTCAAGGTTTGAATCTGAAAGGCATTTGGAATTCTGCTTTTGGT	-0.937766	5	1
YDR054C:125:75	TCAGTCGAATAGTACTCCTTTATACTCTCTGCCGCTGACATCTTTGTCCT	-0.700438	503	212
YDR054C:174:124	AATAAAGAGCATACTATTACAAAATAATAGGAGCTTTGCGTTTGTTATTT	-1.20864	58	14
YDR054C:50:0	GTTATTTTTTAGTACACCAAACAAGGAAAAAAGAACAATACAACGTAAAT	1.25946	8	26
YDR054C:75:25	TTACTGTTTAGGACTTATAGCGACTGTTATTTTTTAGTACACCAAACAAG	0.723779	85	150
YDR055W:50:0	GATCTAATCCAAGAGAGAAGCAAAAAAAAAAAGCTCGCTATAAAAATATC	0.160847	0	0
YDR055W:61:11	ACGCTGCAATAGATCTAATCCAAGAGAGAAGCAAAAAAAAAAAGCTCGCT	0.160847	0	0
YDR056C:50:0	ACTATTCAACACTATCTAACAAGAACTGTACAATACTCATTGAAGGAAAG	0.448529	5	7
YDR056C:58:8	AAGGTGGTACTATTCAACACTATCTAACAAGAACTGTACAATACTCATTG	0.612832	48	76
YDR057W:37:0	ACATATATCGTTATCATCCCCTTTCTTCCCTGTTTCA	-0.276961	3911	2524
YDR058C:39:0	TAAAGCGTCTTGTTTTAAAGGAGGAAAAGCATAAAAAAA	-0.601294	14	6
YDR059C:50:0	TACCATCTTGAAAAGTCATTTTCTGCTCACCACCCTCAACTAAACTAAAA	0.227538	86	92
YDR059C:66:16	AGGACTGCTTATTGACTACCATCTTGAAAAGTCATTTTCTGCTCACCACC	-0.574754	408	195
YDR060W:50:0	ATAGATATTAAACCTCTCCAGTGTCTTTGTTGGTACAGTAATCAAAAATA	0.160847	0	0
YDR060W:66:16	AGTTTGATAAATTTCTATAGATATTAAACCTCTCCAGTGTCTTTGTTGGT	0.26906	69	77
YDR060W:91:41	GTACACATCGGAAGCGAAATTCTATAGTTTGATAAATTTCTATAGATATT	0.694929	16	28
YDR062W:125:75	TCAATTGATTAATTTACAAGACAAAGAACCTTATATTTCGTGTTTTTCAT	0.608035	132	207
YDR062W:175:125	TTATCTGCAACTTTTTATTAGTTAGGTTTTTTTTGTTTGTTTGTTTGTTT	-0.818058	345	129
YDR062W:225:175	AATAAAAGACAACAATCAGTGCCCGTAAGTTTCATTACTATTTTCTATTA	0.210953	252	265
YDR062W:275:225	AATCCGTGGAAGGTGTTTTAACGTTGCCACGAAAAACAGCTCTACATCGA	-0.691365	203	86
YDR062W:325:275	TAACGGAGGGATTATTCATTAGAAAGCGTTCTTACCATTCACTAGGAGCG	-0.732322	170	69
YDR062W:353:303	ATCTCATAAGAAAAATCTCTTTTGAATTTAACGGAGGGATTATTCATTAG	0.160847	0	0
YDR062W:378:328	ATACGGATAGTATACGATATTATCAATCTCATAAGAAAAATCTCTTTTGA	0.0590638	61	55
YDR062W:50:0	GATTCCACACACTTTATTGTGATAGTTTTCAAAGTAAAAAGTAATAGATT	-0.107417	16	12
YDR062W:75:25	TCTAAAGGAAAAAAAGCATAAAGAAGATTCCACACACTTTATTGTGATAG	0.160847	0	0
YDR063W:114:64	TTTAAATGGATTATCAATTCTTTTGTTCACTGATTTTGAATTTATCAGCT	-0.411673	155	87
YDR063W:139:89	GAATTAGGATCAGGGTCTGTTAAACTTTAAATGGATTATCAATTCTTTTG	-1.02738	104	31
YDR063W:50:0	CCCATTATTTAGTTTTGCAATTGCGTCCTCAAAGCATCGAGCAAACAATC	0.167	323	325
YDR063W:75:25	ATTTATCAGCTACCATTGATTTAAACCCATTATTTAGTTTTGCAATTGCG	-0.0458665	331	269
YDR064W:33:0	AACCACTAAATCAATCAACAACAATCAGTCAAA	-0.0796218	654	514
YDR066C:122:72	ATTGGCGAAGATTGGAAGCCATTTATCAACAGCAAGGAGGCATTCTGGAA	-0.190014	97	68
YDR066C:50:0	AGTGATAGGTTTATTTTTATACTAGAAGGACAGGAGCAACGCAAGCCATA	0.160847	41	41
YDR066C:75:25	GAAAAATTGCAGCATATTTAAGAAAAGTGATAGGTTTATTTTTATACTAG	0.0298183	56	49
YDR067C:50:0	TTGCTATGAATACCCAGTTCACACATCTAGAATAAGCTATATGTATCAAA	-0.269936	19	12
YDR067C:75:25	ACCAATATAAACTATGGGTTCACAATTGCTATGAATACCCAGTTCACACA	-0.574603	168	80
YDR068W:48:0	ATAAGGGTACAGCTAGTGAGCTCCATTGCTTCGACGTTTTAGGATAAA	-0.0633222	243	194
YDR069C:50:0	AGTGTGCACGCTTCCAAAGTTTTTTTTACTATTTGATACATGCTTAAGTT	0.290137	383	436
YDR069C:65:15	GCAGATTTAAGACTGAGTGTGCACGCTTCCAAAGTTTTTTTTACTATTTG	0.0836378	322	298
YDR069C:90:40	ATGTATTTATCTTCGGTAGTATAGGGCAGATTTAAGACTGAGTGTGCACG	-0.209074	151	104
YDR071C:50:0	TCTCGGAGAAAAAATAACACCAATACATTACGATTAAATAAAAAGTTAAA	0.160847	0	0
YDR071C:63:13	ATCAGAATACTTTTCTCGGAGAAAAAATAACACCAATACATTACGATTAA	0.459828	65	88
YDR072C:101:51	GCTACTTTTTCATTGCCACCCTAACTGTTCCTTTATTTCACCGGTTGGAC	-0.468198	573	305
YDR072C:126:76	AAGGCATAGTGTTTTCATAAGCATCGCTACTTTTTCATTGCCACCCTAAC	0.18014	461	470
YDR072C:50:0	TTATCATTTCTGCTAAGAATCACCTAAAGTCTTTCAACGTCTAAGAAAGC	0.505916	181	256
YDR072C:75:25	GTTCCTTTATTTCACCGGTTGGACGTTATCATTTCTGCTAAGAATCACCT	-0.398769	503	287
YDR073W:50:0	TTCAATGTGCATATAAGCAAAACACACAGATTTCCTTTTTTCCCAGAAAA	-0.118738	40	30
YDR073W:70:20	ATCACGATCGGGAGTGTAAATTCAATGTGCATATAAGCAAAACACACAGA	0.00669583	20	17
YDR074W:125:75	TTTTCAGTCTAATCTAAGGAAGAAGAAAAGCACTTCAATACGAATAGCTA	0.160847	21	21
YDR074W:175:125	TCAATTTCCGTGTACTTTCGGAGATCTTTCAGTCAGCTTTTCCTTCATCT	-0.545681	1278	630
YDR074W:221:171	ATTTTCGGACATCCCTGGAAGTCTCAGCTGATTCATTTAAATACTATCAA	-0.0494489	231	187
YDR074W:50:0	AAGCAATAGAAAACCAAAATAACACTGCCTGTCACTATTTCTGTGCCGAA	0.0177457	14	12
YDR074W:75:25	CCAACGTACCCAGTTCACGTTGAACAAGCAATAGAAAACCAAAATAACAC	-0.42694	17	9
YDR075W:125:75	CTTTATACGTTAACCTCTCAGCTTTTTCTTTTGCAATTCAGGACACTTTA	-0.239139	181	121
YDR075W:174:124	ACGTCGAAACAGCGGTAGGTAAAAGAGGGTACTACCAGAGGTCTTTTCTC	-0.54074	118	58
YDR075W:50:0	TAGCAAAGTAAAACAGCACGAAAAAAGTGATTACAAATTTCAAGGGAGAT	0.523752	31	45
YDR075W:75:25	ACTTGTAGTCACACGCTAGTCCACGTAGCAAAGTAAAACAGCACGAAAAA	0.160847	0	0
YDR076W:38:0	AAGGAAAAGAACTTATTAATAATATATAATATGAAAAT	-0.357947	41	24
YDR077W:43:0	AACTACAAAGACAAGCAAAATAAAATACGTTCGCTCTATTAAG	1.47303	27	103
YDR078C:17:0	AAGTCACAAGGGTGAGT	-0.110429	7596	5791
YDR079C-A:34:0	CAAAGCCAAGATACTTTTGTAAAAGAACGAAAAA	0.401068	835	1062
YDR079W:32:0	CAAACAAAAGTAATCACTTCGACAAGTACAAA	0.693957	354	604
YDR080W:37:0	ATTTTAACGAAGAGTATATACCTACTATTAGACATTA	0.385748	340	426
YDR081C:50:0	AATTTTGTGGTAACACCAAGCAGTAAAGAGACAGCTTTATTATAACCAGC	-0.244619	8	5
YDR081C:62:12	GTTCGCGTTTTGAATTTTGTGGTAACACCAAGCAGTAAAGAGACAGCTTT	-0.415767	88	49
YDR081C:87:37	AGCAAAGTTTGATCAATCGTGACTAGTTCGCGTTTTGAATTTTGTGGTAA	-0.348963	327	196
YDR082W:50:0	TCTGTGCGAAAAAAGAGCAATAAGCTGGCTTTTAATAATGGGTTGGAGCC	-0.87405	303	107
YDR082W:67:17	CTTGTTGATATTCCATTTCTGTGCGAAAAAAGAGCAATAAGCTGGCTTTT	0.331028	220	261
YDR082W:92:42	AAGCATTGGAATATATGAAATCCTGCTTGTTGATATTCCATTTCTGTGCG	-0.329883	311	190
YDR083W:22:0	AAGGACGTTAACGAAATTTTAT	0.43414	1994	2621
YDR084C:26:0	GCTGGTGCTCTAATTACGAATGAAAC	-0.173761	2464	1763
YDR086C:50:0	ACTACGCTAGTTTACCAAAGATAAAATCACGTATAACATTGAAAAATAAA	0.0273151	15	13
YDR086C:68:18	CTCGTGTCCATTGTCCGCACTACGCTAGTTTACCAAAGATAAAATCACGT	0.105714	260	246
YDR086C:93:43	ACAGATTGGCGTGTATTGTCCATAACTCGTGTCCATTGTCCGCACTACGC	-0.711694	681	284
YDR087C:29:0	ACTTAAAAAATCGAGTGAGAACATTCACA	-0.100736	894	688
YDR088C:125:75	TCCTTCGTTATCTATTGAATAGCTTGCCTTTCAAGTAAATCAATAATCAA	0.503791	87	123
YDR088C:154:104	AAGACAATAATAGTACCCATAACGATAACTCCTTCGTTATCTATTGAATA	-0.175626	111	79
YDR088C:179:129	AACTAGTGACTAGTTCGAACGCGGAAAGACAATAATAGTACCCATAACGA	-0.274472	50	32
YDR088C:50:0	CTTCTGAAAAAGATACCAGTTACACTGAAATACAACGATCGGATTACATA	0.2909	35	40
YDR088C:75:25	GTCTGCGTATATCATTTATCGAGCACTTCTGAAAAAGATACCAGTTACAC	0.381247	145	181
YDR089W:121:71	GTCCGTTGCCCTCTTGAATATAATAGAGATAGAGTTTAATACTTGCTTTT	-0.809287	247	93
YDR089W:50:0	TATCTCCATCTCAGCCCTAGGTAAGGATAGATACGAAGGGTTGTACAATC	0.275916	327	367
YDR089W:75:25	TTTTTACCTTTGCTTTTTTTTTGTATATCTCCATCTCAGCCCTAGGTAAG	0.544263	427	627
YDR090C:114:64	AATGCTTTCCTTCTGGTGCCTTCTACTTTCCGCTGATCTCTATTTTCAAA	-0.816843	847	318
YDR090C:50:0	ATAAACTGTGGAATACTATAACATAACATAGATTTAAGAATAAGGTATTC	1.04324	47	115
YDR090C:75:25	CTATTTTCAAATTAACCGCTGAAATATAAACTGTGGAATACTATAACATA	-0.880607	50	17
YDR091C:50:0	ATTCCACCTAGCCTTCTGCAAAAGTTCTTAAGAAAACACGACAGACCATA	-0.0775645	32	25
YDR091C:57:7	AGCGCGAATTCCACCTAGCCTTCTGCAAAAGTTCTTAAGAAAACACGACA	0.160847	2	2
YDR092W:24:0	AGGTTCATTGTAACATAGTTAGAA	0.192595	1487	1535
YDR093W:125:75	GTTTAAAAAACCATCCGTTTCTTTTTCTATTTGCTTTCACATTGTTCGTA	-0.427421	415	230
YDR093W:175:125	GTGAAACAAATTAATCAAAAGAGTTGATTAAACGCAAGAGCGTTGAGAGA	0.160847	0	0
YDR093W:225:175	ACCTCTTAGTATTACTTTCGCTGCTTCTTTCTGCTGTGACAGAGTCTCAG	-0.365852	126	74
YDR093W:262:212	AATAGACAAACCAGATTCATCGCTTACTCGGTGGTTTACCTCTTAGTATT	-0.141761	179	132
YDR093W:50:0	TTAATAATAGAATTCTTTAAAAAGAATCATAGCATAAACTCAACACATAT	0.160847	0	0
YDR093W:75:25	CTTTGTTCCTTTTTTCCTAATCCTTTTAATAATAGAATTCTTTAAAAAGA	-0.532301	1	0
YDR096W:125:75	TTTCAATTTTTTTCACTATTTGTTTCTTTGTTGGGCGTTTAAAAAGTATT	-0.643115	142	63
YDR096W:175:125	GTTTTTCCTTTCTGTTCATCATTAACCTCCATTTCCCAATTTTTTCCAAT	-0.678593	1013	437
YDR096W:225:175	TCGCTAAGTCTCTTGCTTACAGAAACTCTTTGCCCACCACATATTTCATC	0.102497	246	232
YDR096W:273:223	AAATAGCCAAGTAATAATACGTTTGGCCAGTTGTATTTTTTTTTTGTTTC	-0.402317	352	200
YDR096W:298:248	AAAAGAAGTTGGTCTGTTAGGAAGAAAATAGCCAAGTAATAATACGTTTG	-0.291139	32	20
YDR096W:50:0	TTGTAATTTTTTTTTTTTAATTTGAAGAATAGCTACAAAAACAGACTACA	1.22556	9	28
YDR096W:75:25	TGCTTCTACAAAGTGAACAACATCGTTGTAATTTTTTTTTTTTAATTTGA	-0.403683	50	28
YDR097C:38:0	AACTAGTTAATTTTGACAAAGCCAATTTGAACTCCAAA	0.266207	260	289
YDR098C:38:0	AAGCAAGATATTACACAGCAGCAAAACTTTTTCAGGAA	0.751184	173	313
YDR099W:125:75	TTGATTAAGGGGGAAAAGCAAAGAACGAGAAAACTTGGACAGAAGGTTAA	0.160847	0	0
YDR099W:175:125	TTTTTCAAAAAAAATTGCCTCTCCCGGTTTTTAATCATTATTTTTTTCGA	0.372817	71	88
YDR099W:225:175	AGCTATCTTAAACATTCGTTCTTTTTATCAAATTTCAATTACTAACTTAT	0.187875	72	74
YDR099W:275:225	TAGTCTTTTTTTTTTCAAATATTCATCATCAAAGGTTACGAAATCTTTTG	-0.637661	39	17
YDR099W:325:275	CGAGGAAAAAGTCGGTCGAAAGGGGCAAATGTTATTATAAGTCCCTCCAG	-0.72479	256	105
YDR099W:375:325	AATGATTAGTAGTGTGTCACCCGGATCAGCAAAATGACACACACGAAATA	-0.828282	120	44
YDR099W:425:375	ATCGTCCCTTTTTTGTTTAGGAAGAACGGACAAATCGGTCGTCTGCTCGA	-0.825374	495	184
YDR099W:475:425	GCGTGGGTATTCATATGACCAGAGATAATAATACAGCGAATACTATTGAA	-0.627611	10	4
YDR099W:50:0	AAAAAGAAAAATTATCAAATCAACAAAAAGTACCCGTTACAACAAAAAAA	0.160847	0	0
YDR099W:525:475	CAGAACAGCGAGGTAACACTTATTTTTGTTACGACCAATCCGTAATTCAA	-0.603477	130	60
YDR099W:575:525	ATAGGTCCACCCGTGTGATGTTGCATTCTGAAATGTTTAGTTATCTCTGT	-0.701642	198	83
YDR099W:625:575	TATTGGTTTAAGCACAGCGGATTGCTTTCTTCTAATACAAGAACTAGAAC	0.129756	97	94
YDR099W:675:625	AGTTTCTCTTCCTTTGTTTTTCCCACTTTCTTTTTTTTATATATATCTTA	-0.334941	549	334
YDR099W:725:675	TGAAAATGTTAATTATATCAACTTAACAGGCCTTGAAAGTGAAGTGTTAT	-0.467762	14	7
YDR099W:75:25	TACTCTGACAATTTCAAAACGAAGTAAAAAGAAAAATTATCAAATCAACA	0.160847	2	2
YDR099W:775:725	ACCTTCATCTTCTCTGATTTGAATTATTACCGACATGAATGTTACTCTCC	-0.804558	385	146
YDR099W:825:775	TATGTTTTACCTCTCAATAACTTGTTTCATTAATAGCTCCTTCCACAACC	-0.669357	405	176
YDR099W:864:814	CCACCTTCAAATTTAAGAATTCATATTTGAATCGAACCGTATGTTTTACC	-1.22545	3	0
YDR099W:889:839	GCGATCAATTGCATTCTTTTCCACACCACCTTCAAATTTAAGAATTCATA	-0.126836	3	2
YDR100W:26:0	AACCACAAGGGATCACAAACGAAAGG	0.307077	1828	2116
YDR101C:27:0	GACCCGACTAATATTGCTAAAACTATC	0.399187	2154	2734
YDR103W:125:75	TCGAAAAGTTGACGACAAAAGAAAGGCATAAAAAAGTAATTTGAAAATAT	0.160847	0	0
YDR103W:175:125	CATCAAAATATGAAAGGCGATAGTAGCTAAAGAAAATACCGAGAATTTCC	0.160847	22	22
YDR103W:225:175	TGGGTGCGGCGATATGTAGCTTGTTAATTTACACATCATGTACTTTTCTG	-0.961146	475	154
YDR103W:275:225	GGTAACCTGTCATAATTTTGAACAATTTCCCTTCTTTTCTTTTTTTTTTT	-0.173667	611	437
YDR103W:325:275	TGAATTAATTAAAAAATATAAAGGTAGTGATTAGACGACACATGTCCATA	0.160847	0	0
YDR103W:375:325	AGTCATTTAGAAGGCGTATTGCTCAATAGTAGAAAGCAGGCCTGTGCACA	0.317416	176	206
YDR103W:425:375	AATATTGGATCTTTCCGCAGTTCTACTCTGATACATTTTTGAAGTAGGAG	0.016452	118	102
YDR103W:475:425	TAACAGATTCTAAAACTGACAGAAATATTTCGAGTGAAGAAGAAGCGTTA	-0.158787	105	76
YDR103W:50:0	CATCCGCGCTAAAAAAGGAAGATACAGGATACAGCGGAAACAACTTTTAA	0.0684732	33	30
YDR103W:525:475	ATCGACAAGATGAAAATCTAGAAGTATCAAGTTTCCTTTAAAGGGATATA	-0.650084	17	7
YDR103W:575:525	ATCAGCTGATTTCTCATAGAGCTGTTTCTCTGATAACACGTTGTTTGAAC	0.090779	265	247
YDR103W:609:559	TGTAAATTCACGAAGTGACTGACAGAATACTGACATCAGCTGATTTCTCA	-0.560003	365	177
YDR103W:634:584	ATGAATTGCACGAAAGAGCAGTCAATGTAAATTCACGAAGTGACTGACAG	-0.546094	72	35
YDR103W:75:25	TTTAAAACTGTTTTAACCCATCTAGCATCCGCGCTAAAAAAGGAAGATAC	0.160847	0	0
YDR104C:49:0	ATACAGTGATTGTAAAAGAAAGGGATTTGTCTTCGAAACATTTCGAAAT	-0.774614	78	30
YDR105C:50:0	ACAGATTTACTTCATATCAAAATACCCATCACAAAGTACAACAATCTACC	0.0823749	52	48
YDR106W:18:0	AGGAAACCCTATGAGGAA	-0.22711	6906	4685
YDR107C:15:0	AATTAATAATCGGTA	0.0166526	6195	5363
YDR108W:36:0	ATTCAGTCGGCTTTACAGATACTGAGGTAACTTATA	0.103027	533	503
YDR110W:38:0	AACGATTGTGTGAGTGTGAATTTGTGCTGAGGATAACA	-0.230579	388	262
YDR111C:125:75	TCTCATTCAGTAAATACCCCAATATTTCCTCATATCTCTAGAGGCATAAA	-0.583594	119	56
YDR111C:167:117	TCACTTTTCTTTTTGATCCTTTCTTGACTGACATCATCCTTTTCTCATTC	-0.436801	957	526
YDR111C:192:142	ACTTCGTGTGGGAACTATATTCTGTTCACTTTTCTTTTTGATCCTTTCTT	-0.391106	454	261
YDR111C:50:0	CACAGTAGTGTTGTTTTTGTAAGTGGTAAACACAGAAGAAGTAAGAACAC	0.129098	31	30
YDR111C:75:25	AGATAAGAATAAAGGGAAGGAGCGCCACAGTAGTGTTGTTTTTGTAAGTG	-0.283085	52	33
YDR113C:102:52	ATTCGGCGAAGGCAAGTAACGGTTGCTAGCGGTTTTTCCCATTCACATAC	-0.575154	738	353
YDR113C:50:0	TTACACTTCTGCGGTACCAAGCTAGATTAAGTGCTAGATAATAAACCTTT	0.096308	79	74
YDR113C:75:25	AGCGGTTTTTCCCATTCACATACTATTACACTTCTGCGGTACCAAGCTAG	0.05059	363	325
YDR115W:40:0	GAGAAACGTTGGAATAGAACAGTAGTAATCGCAGGACGGA	-0.668256	235	102
YDR116C:7:0	AAAGAAG	-0.146888	6413	4714
YDR117C:25:0	AGTGTAGCGCAGGATTAGTACAGCT	0.176015	3205	3254
YDR118W:38:0	AGGGTTCTGTTGAACACGCGTAAACGACTCAAGACGAA	0.361967	201	246
YDR119W-A:29:0	ACAGACTCTTTTAATTCTAAATAGGTAAA	0.125578	605	584
YDR119W:50:0	GATTACTTTTTTTTTACATTTTCAAGGTAATTGACGTCGGTTAAGTAGAG	0.464033	47	64
YDR119W:70:20	CTCAGATTTTTGCTACTTTTGATTACTTTTTTTTTACATTTTCAAGGTAA	0.726654	91	161
YDR119W:95:45	ATAGAATAGCCGAAGTGTCAGTTTACTCAGATTTTTGCTACTTTTGATTA	0.372271	411	508
YDR121W:110:60	ACCTAGAGGTTTTAGGTGAAAGGAAGGATTTTTTTAATTATTTAATACTT	0.160847	0	0
YDR121W:135:85	ACAATAGCAGAAGCCACAGAATATTACCTAGAGGTTTTAGGTGAAAGGAA	0.160847	0	0
YDR121W:50:0	GTCAAGCCTTTCATTGCTTATTTATATCAGACCATATATTTTTACACACG	0.722764	247	434
YDR121W:75:25	AATTATTTAATACTTTGAAATAGAAGTCAAGCCTTTCATTGCTTATTTAT	0.160847	0	0
YDR122W:125:75	CAAACATCTTTGCTCCGATTAGAGCAACTGAATATACTAGGGATTTTGGG	-0.829552	314	116
YDR122W:175:125	CCCCCCTACCCTATCGGTCTTTCATTTTCCAACTATTGATTAGTAAAATT	0.448529	56	75
YDR122W:225:175	AGGACATACGGTAACCTAGGCTAGTTAACATAATTAGTTGTCACCCTTCG	0.0602593	417	377
YDR122W:263:213	GTGATTTGAAATTTTTTGAGATTTACTTCGTTATTATAAGGACATACGGT	0.811434	11	22
YDR122W:288:238	AAGCAGGTTTAGTTAGAGCCACTTTGTGATTTGAAATTTTTTGAGATTTA	0.155597	190	189
YDR122W:50:0	TCTTTTAAACAGGTACAGTTTATTACGATTACTTTTTGCTCACGTAGAAT	0.294378	34	39
YDR122W:75:25	CTATTACGCATTTTTTTTTTCAACTTCTTTTAAACAGGTACAGTTTATTA	0.229839	41	44
YDR123C:50:0	CCATCTCGTTGACGTGCAATAAATAAATACATGGAACAGCAAAGGAGAAA	-0.374077	69	40
YDR123C:70:20	AATTCGAAATTGGTTCGGTTCCATCTCGTTGACGTGCAATAAATAAATAC	0.0661011	176	160
YDR124W:125:75	CGAAGGGATGGCCCAACTGAAGCAGGTTCCTCTGCTTGTTTCTCAGCTTA	-0.91467	641	218
YDR124W:175:125	GGTGCCTGCGAAGTCTTAGTGAAGAGTTTAAGATTAGAAGTATATAGCAT	-0.632842	114	51
YDR124W:225:175	GTTGTTTTAAGTTGTTGTAGTAATCTCGCGACCTGAGACATCCTTGAAGC	-0.380751	439	255
YDR124W:275:225	GGAACTTTTTCTTGTACTGTTGAAAAACAGCACGCTGCAGTTGCATCAGG	-0.238953	87	58
YDR124W:325:275	TGCGACTGAGAACAAATTCCTTTGCAATGGCATCGGCAATGGCACAATAT	-0.161927	57	41
YDR124W:375:325	TCCATATTATCAAGGATTCAAAGTAACTCAGATCTGCAGTAAAGGAGAGA	-0.314888	139	86
YDR124W:425:375	ATATTAAGCGTTGAGATTATAATAATAGAAATAATGGAAGAGGCACTCGA	-0.895206	45	15
YDR124W:455:405	AGATTTGGTTTGAGTGTGGTTGGTTAATTCATATTAAGCGTTGAGATTAT	-0.111501	150	114
YDR124W:50:0	ACATGTGCATTTGTGCGTACGTCATTTTTCGATAGAGTCAGCTTAAGTAC	-0.719726	274	113
YDR124W:75:25	TATAAAGGATGGATTGCGTATGTATACATGTGCATTTGTGCGTACGTCAT	-1.00094	146	45
YDR125C:119:69	GAGACAACTGTTTCGATTCCAGCTTAGAACTCCACAGAGCTTCACATGTT	-0.60376	289	134
YDR125C:50:0	TTCTGACAGTTTCCTTATGCCTTTCCAGTTTAAGGATGAGCGAATGAAAA	-0.627611	76	34
YDR125C:75:25	CATGTTTTACACCTCTATTTATATATTCTGACAGTTTCCTTATGCCTTTC	-0.193563	629	441
YDR126W:5:0_YDL086W:5:0	AAACA	0.0367193	19231	16986
YDR127W:50:0	ATATAATCTCCTAGTTGAGAAATCCCTACGTAAGATAATTGTATATTACG	0.601403	55	86
YDR127W:70:20	ATACTCGGTCGTTCAAGTTTATATAATCTCCTAGTTGAGAAATCCCTACG	0.460623	451	609
YDR128W:34:0	GCCTCTGGCCCGTTTATTCACTGAAGAATTAATT	0.37504	2109	2613
YDR129C:50:0	TATCAGAGAAGAAGCTGATATATTAGCCCTAAGGAGTACACCAAAACACA	0.160847	0	0
YDR129C:73:23	AAGAAAGCTCTTTACACTAAAATTATCAGAGAAGAAGCTGATATATTAGC	0.281293	124	140
YDR130C:28:0	GATGTGACATAGTTCAATAAAACAAATT	-0.225365	642	436
YDR131C:102:52	AACGTAGAGAAAATAGTAGGATAATGTGTGCAAAAAGAAGAAACTTTGGT	0.160847	0	0
YDR131C:50:0	CTTAAAATAGATAAAAATAACCCTACTGCCAATTTGAAAGGGCCCGAAAA	-0.338145	55	33
YDR131C:75:25	GTGCAAAAAGAAGAAACTTTGGTGTCTTAAAATAGATAAAAATAACCCTA	-0.344248	57	34
YDR132C:121:71	GTATATCTTATGTGTGAATGTTATATACCATAATCTAACGAAAGATAGCG	0.160847	75	75
YDR132C:50:0	ACTCGTAAATATTACCAACAAAGAAAGTTCCCAATATAATCATATAGAAA	0.160847	0	0
YDR132C:75:25	AGCGAATTAAAGACCGGTCTGTGGCACTCGTAAATATTACCAACAAAGAA	0.28601	104	118
YDR135C:50:0	ACAGTTTGAGAATAAATTAGGGGTATCGTACTACCGTAAAGAACAAGAAA	0.971777	7	17
YDR135C:55:5	AATTAACAGTTTGAGAATAAATTAGGGGTATCGTACTACCGTAAAGAACA	0.0532158	48	43
YDR137W:50:0	CTTGAGCTGTTGATTTTGATTGTGATATTTTTCATACTTTAGAAGAAGAT	-0.294629	40	25
YDR137W:60:10	CCCATAATTTCTTGAGCTGTTGATTTTGATTGTGATATTTTTCATACTTT	-0.150092	463	339
YDR137W:85:35	AGTCGAAACAAACAGCGAAAGCTAGCCCATAATTTCTTGAGCTGTTGATT	0.0610961	157	142
YDR138W:13:0	CAAAGGAGTAATA	0.602132	2220	3452
YDR139C:26:0	AATTAACTTCCTTACAGCCGTAACCG	-0.138624	2758	2044
YDR140W:14:0	GAGAAAGGTGAAGT	0.315424	5353	6248
YDR141C:48:0	GAAATAAAAAGCCGACAGAGCAGCTTTTTCTGAGAGGATCGACAAAAA	0.118287	23	22
YDR142C:125:75	CCATAAAATCTTTTACCGGAGGTCGAAATCGTTTTCTTTCTGATTTGGAA	-0.366786	99	58
YDR142C:152:102	CTGTGGAACACAAACTGTGTTTTCTTACCATAAAATCTTTTACCGGAGGT	-0.270875	327	212
YDR142C:177:127	TAAAAGGTGAAAACACTTTTAAGAACTGTGGAACACAAACTGTGTTTTCT	-0.30821	210	131
YDR142C:50:0	CTCATATTGTTAACGGACTATCATCTAACTTTTTGCATAATTTATACAAC	0.246789	155	169
YDR142C:75:25	TTCGACGCTCGAAAAGTGCAGAGATCTCATATTGTTAACGGACTATCATC	0.301204	218	251
YDR143C:121:71	TATATATCCTCTAGTGAAGCTACTATAGATAGAAATTATTTAGCATTTCA	0.583261	77	118
YDR143C:146:96	ATATTGAAGGAAATATAGTTTATCATATATATCCTCTAGTGAAGCTACTA	0.160847	0	0
YDR143C:50:0	TTTCCCCTTTGTTTTCTCTCATAGTCTTGTAACCTCAGCTTTTGTTCATT	-0.765701	489	193
YDR143C:75:25	TTCAGGATAGTTCGTTTCTCCCTTTTTTCCCCTTTGTTTTCTCTCATAGT	-0.602918	1143	532
YDR144C:115:65	TCACTCGTTCTTGCTAAGAAATTGTAATTGGCTAAAAGTATCAACGAGAG	0.368486	38	47
YDR144C:140:90	ACTTTTGGGAGAAATTTGGTTGGCGTCACTCGTTCTTGCTAAGAAATTGT	-0.726892	327	134
YDR144C:50:0	TTATTCGCTTGAGCAAATACGTCAAAAATAAACGAAAAAGAAAGAGCTCT	0.160847	0	0
YDR144C:75:25	TCAACGAGAGAACAAGCTTTTGTCGTTATTCGCTTGAGCAAATACGTCAA	0.114326	43	41
YDR145W:50:0	GCATTCGAATCATAACCGAATCTTTGCCAGTGTGTGTATAAAATACGACA	-0.625194	247	112
YDR145W:66:16	AGGAGACTGTCCAATAGCATTCGAATCATAACCGAATCTTTGCCAGTGTG	-0.0157474	382	320
YDR146C:125:75	ATAGATACCACCATATAACTCGTTCTTGGAGCTAGGTAAATAGATCCTGA	-0.153269	114	83
YDR146C:164:114	AAAAAGGCATCGTTGGAAGAAAGATTTGAGAACGACAATATAGATACCAC	0.0906423	58	54
YDR146C:50:0	ATTAAAGCGCAATCAAATAAAATATTAACGTCATTGTTTTTTCGAAAAAG	0.160847	0	0
YDR146C:75:25	GAACGTGTTTAACATCTGCGATATAATTAAAGCGCAATCAAATAAAATAT	-0.567392	28	13
YDR147W:125:75	AACAATAGATGTCGTTGTTGAGATAACAGATTGGCACAAAATTACTAAAT	-0.244619	143	95
YDR147W:175:125	TTTGGCTACCCGGAGGTCGTTTGCAAAAGAAAGTGTATGCAAATCTACAA	0.0316348	32	28
YDR147W:225:175	CTAGACAGCATGTGAAAACGGTGATGATAGTAAAAAAATATCGTTTGGGT	-0.544135	84	41
YDR147W:275:225	GACTGCCGAAGTTTTATAAGTAGTTTGACTATGTTTCATAAGTTAGGCCA	-1.21615	106	26
YDR147W:325:275	ATCCAATGCCGTAAATATCTACTTGACACCATTTAATGAAAGAACTGTCT	-0.850754	65	23
YDR147W:375:325	CCGATATTTGATTCGCTCTCCTTTAAGACAGAAATAACATTGGCCCTAGA	-0.236035	57	38
YDR147W:407:357	TACTACCTTTCAGAATATCTAACAATAACACTCCGATATTTGATTCGCTC	-0.931077	148	49
YDR147W:432:382	ACTCCTATCGGCTTTCAGATAATCATACTACCTTTCAGAATATCTAACAA	0.297706	74	85
YDR147W:50:0	TACGAAAGTAGTAGCAGAAATTAACAGATACAGATCTGCAATTTGGCATA	0.102859	141	133
YDR147W:75:25	TGTTGTGGTACGCAGCTATAGTTTGTACGAAAGTAGTAGCAGAAATTAAC	0.0533874	264	237
YDR148C:125:75	AATCCGAAATAAAAAATTAGGCAGCTATCTTTAACGGTATATATCAGTGA	-0.512883	50	25
YDR148C:175:125	ATCTCTTTTTGAGCTTCAGGGGAGGAAATATCTAACGTAAAAAAAAGAAA	0.214914	71	75
YDR148C:225:175	CAGCAAATGCAAATCCTTTTTCCCTCAACTAGGCCTACTTTTCATATATA	0.0335071	275	242
YDR148C:253:203	ACAGGGCTCGGATCCACACTTGGTCTATCAGCAAATGCAAATCCTTTTTC	-0.771423	756	297
[truncated: 9,858 more rows]
