# Supplementary material for: Deep learning of the regulatory grammar of yeast 5′ untranslated regions from 500,000 random sequences
Source: HighWire-hosted journal article supplement (doi:10.1101/gr.224964.117), 2017-11-02
Supplement: Supplemental_Table_S7.xlsx [file Supplemental_Table_S7.xlsx]

## Sheet: evolved_random_seqs_5000_40rnds
In silico evolutions of 5,000 random sequences
	Steps ->
UTR	0	1	2	3	4	5	6	7	8	9	10	11	12	13	14	15	16	17	18	19	20	21	22	23	24	25	26	27	28	29	30	31	32	33	34	35	36	37	38	39	40
0	AAGTATCAATGTGACCAAGAAGTACTGCTCCCAACCCATCGTGTTACGAC	AAGTATCAAAGTGACCAAGAAGTACTGCTCCCAACCCATCGTGTTACGAC	AAGTATCAAAGTGACCAAGAAGTACTGCTCCCAACCCATCGTGTTAAGAC	AAGTATCAAAGTGACCAAGAAGTACTACTCCCAACCCATCGTGTTAAGAC	AAGTATCAAAGTGACCAAGAAGTACTACTACCAACCCATCGTGTTAAGAC	AAGTATCAAAGTGACCAAGAAGTACTACTACAAACCCATCGTGTTAAGAC	AAGTATCAAAGTTACCAAGAAGTACTACTACAAACCCATCGTGTTAAGAC	AAGTATCAAAGTTACAAAGAAGTACTACTACAAACCCATCGTGTTAAGAC	AAGTATCAAAGTTACAAAGAAGTACTACTACAAACACATCGTGTTAAGAC	AAGTATCAAAGTTACAAAGAAGTACTACTACAAACACATCGTATTAAGAC	AAGTATCAAAGTTACAAAGAAGTACTACTACAAACACATCGTATCAAGAC	AAGTATCAAAGTTACAAAGAAGTACTACTACAAATACATCGTATCAAGAC	AAGAATCAAAGTTACAAAGAAGTACTACTACAAATACATCGTATCAAGAC	AAGACTCAAAGTTACAAAGAAGTACTACTACAAATACATCGTATCAAGAC	AAGACTCAAAGTTACAAAGAAGAACTACTACAAATACATCGTATCAAGAC	AAGACACAAAGTTACAAAGAAGAACTACTACAAATACATCGTATCAAGAC	AAGATACAAAGTTACAAAGAAGAACTACTACAAATACATCGTATCAAGAC	AAGATACAAAGTTACAAAGAAGAACTACTACAAATACAACGTATCAAGAC	AAGATACAAAGTTACAAAGAAGAACTACTACAAATACAAAGTATCAAGAC	AAGATACAAAGTTACAAAGAAGAACTACTACAAATACAAATTATCAAGAC	AAGATACAAAGTTACAAAGAAGAACTACTATAAATACAAATTATCAAGAC	AAGATACAAAGTTACAAAGAAGAACTACTATAACTACAAATTATCAAGAC	AAGATACAAAGTTACAAAGAAGAACTACAATAACTACAAATTATCAAGAC	AAGATACAAAGTTACAAAGAAGAACTACAAAAACTACAAATTATCAAGAC	AAGATACAAAGCTACAAAGAAGAACTACAAAAACTACAAATTATCAAGAC	AAGATACAAAGCTACAAAGAAGAACTACAAAAACTACAAATAATCAAGAC	AAGATACAAAGCTACAAAGAAGAACTACAAAAACTACAAATAAACAAGAC	AAGATACAAAGCTACAAAGAAGAACTACAAAAACTACAAATATACAAGAC	AAGATACAAAGCTACAAAGAAGAACTACAAAAACTACAAATATACAAGAA	AAGATACAAAGCTACAAAGAAGAACTACAAAAACTACAAATATACAAGAA	AAGATACAAAGCTACAAAGAAGAACTACAAAAACTACAAATATACAAGAA	AAGATACAAAGCTACAAAGAAGAACTACAAAAACTACAAATATACAAGAA	AAGATACAAAGCTACAAAGAAGAACTACAAAAACTACAAATATACAAGAA	AAGATACAAAGCTACAAAGAAGAACTACAAAAACTACAAATATACAAGAA	AAGATACAAAGCTACAAAGAAGAACTACAAAAACTACAAATATACAAGAA	AAGATACAAAGCTACAAAGAAGAACTACAAAAACTACAAATATACAAGAA	AAGATACAAAGCTACAAAGAAGAACTACAAAAACTACAAATATACAAGAA	AAGATACAAAGCTACAAAGAAGAACTACAAAAACTACAAATATACAAGAA	AAGATACAAAGCTACAAAGAAGAACTACAAAAACTACAAATATACAAGAA	AAGATACAAAGCTACAAAGAAGAACTACAAAAACTACAAATATACAAGAA	AAGATACAAAGCTACAAAGAAGAACTACAAAAACTACAAATATACAAGAA
1	CAGTTAGAACGCATGGCTTGATTCGCGAATGATCCTCTCGGCGATCTAGG	CAGTTAGAACGCATGGCTTGATTCGCGAATAATCCTCTCGGCGATCTAGG	CAGTTAGAACGCAAGGCTTGATTCGCGAATAATCCTCTCGGCGATCTAGG	CAGTTAGAACGCAAGGCTTGATTCGCGAATAATCCTCTCGGCGATCTAAG	CAGTTAGAACGCAAGGCTTGATTCGAGAATAATCCTCTCGGCGATCTAAG	CAGTTAGAACGCAAGGCTTGATTCAAGAATAATCCTCTCGGCGATCTAAG	CAGTTAGAACGCAAGGCTTGATTCAAGAAAAATCCTCTCGGCGATCTAAG	CAGTTAGAACGCAAGACTTGATTCAAGAAAAATCCTCTCGGCGATCTAAG	CAGTTAGAACGCAAGACTTAATTCAAGAAAAATCCTCTCGGCGATCTAAG	CAGTTAGAAAGCAAGACTTAATTCAAGAAAAATCCTCTCGGCGATCTAAG	CAGTTACAAAGCAAGACTTAATTCAAGAAAAATCCTCTCGGCGATCTAAG	CAGTTACAAAGCAAGACTTAAGTCAAGAAAAATCCTCTCGGCGATCTAAG	AAGTTACAAAGCAAGACTTAAGTCAAGAAAAATCCTCTCGGCGATCTAAG	AAGTTACAAAGCAAGACTTAAGTCAAGAAAAATCCTCTCGACGATCTAAG	AAGTTACAAAGCAAGACTTAAGTCAAGAAAAATCCTATCGACGATCTAAG	AAGTTACAAAGCAAGACTTAAGTCAAGAAAAATCCTATCTACGATCTAAG	AAGTTACAAAGCAAGACTTAAGTCAAGAAAAATCCTATCTAAGATCTAAG	AAGTTACAAAGCAAGACTTAAGTCAAGAAAAATCCTATATAAGATCTAAG	AAGTTACAAAGCAAGACTTAAGTCAAGAAAAATCCTATATAAGAACTAAG	AAGTTACAAAACAAGACTTAAGTCAAGAAAAATCCTATATAAGAACTAAG	AAATTACAAAACAAGACTTAAGTCAAGAAAAATCCTATATAAGAACTAAG	AGATTACAAAACAAGACTTAAGTCAAGAAAAATCCTATATAAGAACTAAG	AGATTACAAAACAAGACTTAAGTCAAGAAAAGTCCTATATAAGAACTAAG	AGATTACAAAACAAGACTTAAGTCAAGAAAAGTCCTATACAAGAACTAAG	AGATTACAAAACAAGACTTAAGTCAAGAAAAGTACTATACAAGAACTAAG	AGATTACAAAACAAGACTTAAGTCAAGAAAAGTACTACACAAGAACTAAG	AGATTACAAAACAAGATTTAAGTCAAGAAAAGTACTACACAAGAACTAAG	AGATTACAAAACAAGATTTAAGACAAGAAAAGTACTACACAAGAACTAAG	AGATTACAAAACAAGATTTAAGACAAGAAAAGTACTACACAAGAACTAAG	AGATTACAAAACAAGATTTAAGACAAGAAAAGTACTACACAAGAACTAAG	AGATTACAAAACAAGATTTAAGACAAGAAAAGTACTACACAAGAACTAAG	AGATTACAAAACAAGATTTAAGACAAGAAAAGTACTACACAAGAACTAAG	AGATTACAAAACAAGATTTAAGACAAGAAAAGTACTACACAAGAACTAAG	AGATTACAAAACAAGATTTAAGACAAGAAAAGTACTACACAAGAACTAAG	AGATTACAAAACAAGATTTAAGACAAGAAAAGTACTACACAAGAACTAAG	AGATTACAAAACAAGATTTAAGACAAGAAAAGTACTACACAAGAACTAAG	AGATTACAAAACAAGATTTAAGACAAGAAAAGTACTACACAAGAACTAAG	AGATTACAAAACAAGATTTAAGACAAGAAAAGTACTACACAAGAACTAAG	AGATTACAAAACAAGATTTAAGACAAGAAAAGTACTACACAAGAACTAAG	AGATTACAAAACAAGATTTAAGACAAGAAAAGTACTACACAAGAACTAAG	AGATTACAAAACAAGATTTAAGACAAGAAAAGTACTACACAAGAACTAAG
2	GGGCACACATATTCGGTAGACCGGTGATAAACTGGCGGGCTCAACCAAGT	GGGCACACATATTCGGTAGACCGATGATAAACTGGCGGGCTCAACCAAGT	GGGCACACATATTCGGTAGACCGATGATAAACTGGCGGGCTCAACCAAGA	GGGCACACATATTCGGTAGACCGATGATAAACTCGCGGGCTCAACCAAGA	GGGCACACATATTCAGTAGACCGATGATAAACTCGCGGGCTCAACCAAGA	GGGCACACATATTCAGTAGAACGATGATAAACTCGCGGGCTCAACCAAGA	GGGCACACATATTCAGTAAAACGATGATAAACTCGCGGGCTCAACCAAGA	GGGCACACATATTTAGTAAAACGATGATAAACTCGCGGGCTCAACCAAGA	GGGCACACATATTTAGTTAAACGATGATAAACTCGCGGGCTCAACCAAGA	GGGCAAACATATTTAGTTAAACGATGATAAACTCGCGGGCTCAACCAAGA	GGGCAAACCTATTTAGTTAAACGATGATAAACTCGCGGGCTCAACCAAGA	GGGCAAACCTATTTAATTAAACGATGATAAACTCGCGGGCTCAACCAAGA	AGGCAAACCTATTTAATTAAACGATGATAAACTCGCGGGCTCAACCAAGA	AGACAAACCTATTTAATTAAACGATGATAAACTCGCGGGCTCAACCAAGA	AGACAAACCTATTTAAATAAACGATGATAAACTCGCGGGCTCAACCAAGA	AGACAAACCTATTTAAATAAACGATGATAAACTCGCGGGCTCAATCAAGA	AGACAAACCTATTTAAATAAACGATGATAAACTCGAGGGCTCAATCAAGA	AGACAAACCTATTTAAATAAACGATGATAAACTCGAGGGCGCAATCAAGA	AGACAAACCTATTTAAATAAACGATGATAAACTCAAGGGCGCAATCAAGA	AGACAAACCTATTTAAATAAACGATGATAAACTCAAGAGCGCAATCAAGA	AGACAAACCTATTTAAATAAACGATGATAAAGTCAAGAGCGCAATCAAGA	AGACAAACCTATTTAAATAAACGATGATAAAGTCAAGAGTGCAATCAAGA	AGACAAAGCTATTTAAATAAACGATGATAAAGTCAAGAGTGCAATCAAGA	AGACAAAGCTATTTAAATAAAAGATGATAAAGTCAAGAGTGCAATCAAGA	AGACAAAGCTATTTAAATAAAAGATGATAAAGTCAAGATTGCAATCAAGA	AGACAAAGCTATTTAAATAAAAGATGATAAAGTCAAGATTACAATCAAGA	AGACAAAGCTATTTAAATAAAAGATGATAAAGTCAAGATTACAAACAAGA	AGATAAAGCTATTTAAATAAAAGATGATAAAGTCAAGATTACAAACAAGA	AGATAAAGCTATTTAAATAAAAGATGATAAAGTCAAGATTACAAACAAGA	AGATAAAGCTATTTAAATAAAAGATGATAAAGTCAAGATTACAAACAAGA	AGATAAAGCTATTTAAATAAAAGATGATAAAGTCAAGATTACAAACAAGA	AGATAAAGCTATTTAAATAAAAGATGATAAAGTCAAGATTACAAACAAGA	AGATAAAGCTATTTAAATAAAAGATGATAAAGTCAAGATTACAAACAAGA	AGATAAAGCTATTTAAATAAAAGATGATAAAGTCAAGATTACAAACAAGA	AGATAAAGCTATTTAAATAAAAGATGATAAAGTCAAGATTACAAACAAGA	AGATAAAGCTATTTAAATAAAAGATGATAAAGTCAAGATTACAAACAAGA	AGATAAAGCTATTTAAATAAAAGATGATAAAGTCAAGATTACAAACAAGA	AGATAAAGCTATTTAAATAAAAGATGATAAAGTCAAGATTACAAACAAGA	AGATAAAGCTATTTAAATAAAAGATGATAAAGTCAAGATTACAAACAAGA	AGATAAAGCTATTTAAATAAAAGATGATAAAGTCAAGATTACAAACAAGA	AGATAAAGCTATTTAAATAAAAGATGATAAAGTCAAGATTACAAACAAGA
3	ATAAACCGTCTAACTAATGACAGGAAATAACGATGGTGTAACGGCTATTA	ATAAACCGTCTAACTAATGACAGGAAATAACGATGGTGGAACGGCTATTA	ATAAACCGTCTAACTAATTACAGGAAATAACGATGGTGGAACGGCTATTA	AGAAACCGTCTAACTAATTACAGGAAATAACGATGGTGGAACGGCTATTA	AGAAACAGTCTAACTAATTACAGGAAATAACGATGGTGGAACGGCTATTA	AGAAACAGTCTAACTAATTACAAGAAATAACGATGGTGGAACGGCTATTA	AGAAACAGTCTAATTAATTACAAGAAATAACGATGGTGGAACGGCTATTA	AGAAACAGTCTAATTAATTACAAGAAATAACGATGTTGGAACGGCTATTA	AGAAACAGTCTAATTAATTACAAGAAATAACGATGTTGGAACAGCTATTA	AGAAACAGTCTAATTAATTACAAGAAATAACGATGTTGGAACAGGTATTA	AGAAACAGTCTAATTAATTACAAGAAATAACGATGTTGGAACAGGTATTC	AGAAACAGTCTAATTAATTACAAGAAATAACGATGTTGGAACAGGTAGTC	AGAAACAGTCTAATTAATTACAAGAAATAACGATGTTGGAACAGGTCGTC	AGAAACAGTCTAATTAATTACAAGAAATAACGATGTTTGAACAGGTCGTC	AGAAACAGTCTAATTAATTTCAAGAAATAACGATGTTTGAACAGGTCGTC	AGAAACAGACTAATTAATTTCAAGAAATAACGATGTTTGAACAGGTCGTC	AGAAACAAACTAATTAATTTCAAGAAATAACGATGTTTGAACAGGTCGTC	AGAAACAAACTATTTAATTTCAAGAAATAACGATGTTTGAACAGGTCGTC	AGAAACAAACTATTTAATTTCAAGAATTAACGATGTTTGAACAGGTCGTC	AGAAACAAACTATTTAATTTCAAGAATTAACGATGTCTGAACAGGTCGTC	AGAAACAAACTATTTAATTTCAAGAATTAAAGATGTCTGAACAGGTCGTC	AGAAACAAACTATTTAATTTCAAGAATTAAAGATGTCTGAACAGGTCGTC	AGAAACAAACTATTTAATTTCAAGAATTAAAGATGTCTGAACAGGTCGTC	AGAAACAAACTATTTAATTTCAAGAATTAAAGATGTCTGAACAGGTCGTC	AGAAACAAACTATTTAATTTCAAGAATTAAAGATGTCTGAACAGGTCGTC	AGAAACAAACTATTTAATTTCAAGAATTAAAGATGTCTGAACAGGTCGTC	AGAAACAAACTATTTAATTTCAAGAATTAAAGATGTCTGAACAGGTCGTC	AGAAACAAACTATTTAATTTCAAGAATTAAAGATGTCTGAACAGGTCGTC	AGAAACAAACTATTTAATTTCAAGAATTAAAGATGTCTGAACAGGTCGTC	AGAAACAAACTATTTAATTTCAAGAATTAAAGATGTCTGAACAGGTCGTC	AGAAACAAACTATTTAATTTCAAGAATTAAAGATGTCTGAACAGGTCGTC	AGAAACAAACTATTTAATTTCAAGAATTAAAGATGTCTGAACAGGTCGTC	AGAAACAAACTATTTAATTTCAAGAATTAAAGATGTCTGAACAGGTCGTC	AGAAACAAACTATTTAATTTCAAGAATTAAAGATGTCTGAACAGGTCGTC	AGAAACAAACTATTTAATTTCAAGAATTAAAGATGTCTGAACAGGTCGTC	AGAAACAAACTATTTAATTTCAAGAATTAAAGATGTCTGAACAGGTCGTC	AGAAACAAACTATTTAATTTCAAGAATTAAAGATGTCTGAACAGGTCGTC	AGAAACAAACTATTTAATTTCAAGAATTAAAGATGTCTGAACAGGTCGTC	AGAAACAAACTATTTAATTTCAAGAATTAAAGATGTCTGAACAGGTCGTC	AGAAACAAACTATTTAATTTCAAGAATTAAAGATGTCTGAACAGGTCGTC	AGAAACAAACTATTTAATTTCAAGAATTAAAGATGTCTGAACAGGTCGTC
4	GCCAAACTCGACTGTTTGAAAGACCGCCCATGACTCAATGTTGCGTAATG	GCCAAACTCGACTGTTTGAAAGACCGCCCATGACTCAAAGTTGCGTAATG	GCCAAACTCGACTGTTTGAAAGACCGCCCAAGACTCAAAGTTGCGTAATG	GTCAAACTCGACTGTTTGAAAGACCGCCCAAGACTCAAAGTTGCGTAATG	GTCAAACTCGACTGTTTGAAAGACCGCCCAAGACTCAAAGTTGAGTAATG	GTCAAACTCGACTGTTTGAAAGACAGCCCAAGACTCAAAGTTGAGTAATG	GTCAAACTCGACTGTTTGAAAGACAGCCCAAGACTCAAAATTGAGTAATG	GTCAAACTCGACTGATTGAAAGACAGCCCAAGACTCAAAATTGAGTAATG	GTCAAACTCTACTGATTGAAAGACAGCCCAAGACTCAAAATTGAGTAATG	GTCAAACACTACTGATTGAAAGACAGCCCAAGACTCAAAATTGAGTAATG	GTCAAACACTACTGATTTAAAGACAGCCCAAGACTCAAAATTGAGTAATG	GTCAAACACTACTTATTTAAAGACAGCCCAAGACTCAAAATTGAGTAATG	GTCAAACACTACTTATATAAAGACAGCCCAAGACTCAAAATTGAGTAATG	GTCAAACACTACTTATATAAAGACAGCTCAAGACTCAAAATTGAGTAATG	GTCAAACACTACTTATATAAAGACAGCTCAAGACACAAAATTGAGTAATG	GTCAAACACTACTTATATAAAGAAAGCTCAAGACACAAAATTGAGTAATG	GTCAAACACTACTTATATAAACAAAGCTCAAGACACAAAATTGAGTAATG	GTCAAACACTACTTATATAAACAAAGATCAAGACACAAAATTGAGTAATG	GTCAAACACTACTTATATAAACAAAGATCAAGACACAAGATTGAGTAATG	GTCAAACACTACTTATATAAACAAAGATCAAGACACAAGATTAAGTAATG	GTCAAACACTACTTATATAAACAAAGATCAAGACACAAGATTAAGTAAAG	GTCAAACACTACTTATATAAACAAAGATCAAGACACAAGATTAAGTCAAG	GTCAAACACTACTTATATAAACAAAGATCAAGACACAAGATTAAGACAAG	GTCAAAAACTACTTATATAAACAAAGATCAAGACACAAGATTAAGACAAG	GTCAAAAACTACTTATATAAACAAAGATCAAGACACAAGAATAAGACAAG	GTCACAAACTACTTATATAAACAAAGATCAAGACACAAGAATAAGACAAG	GTTACAAACTACTTATATAAACAAAGATCAAGACACAAGAATAAGACAAG	GTTACAAACTATTTATATAAACAAAGATCAAGACACAAGAATAAGACAAG	GTTACAAACTATTTATATAAACTAAGATCAAGACACAAGAATAAGACAAG	GTTACATACTATTTATATAAACTAAGATCAAGACACAAGAATAAGACAAG	GTTATATACTATTTATATAAACTAAGATCAAGACACAAGAATAAGACAAG	GTTATATACTATTTATATAAACTAAGATCAAGACACAAGAATAAGACAAG	GTTATATACTATTTATATAAACTAAGATCAAGACACAAGAATAAGACAAG	GTTATATACTATTTATATAAACTAAGATCAAGACACAAGAATAAGACAAG	GTTATATACTATTTATATAAACTAAGATCAAGACACAAGAATAAGACAAG	GTTATATACTATTTATATAAACTAAGATCAAGACACAAGAATAAGACAAG	GTTATATACTATTTATATAAACTAAGATCAAGACACAAGAATAAGACAAG	GTTATATACTATTTATATAAACTAAGATCAAGACACAAGAATAAGACAAG	GTTATATACTATTTATATAAACTAAGATCAAGACACAAGAATAAGACAAG	GTTATATACTATTTATATAAACTAAGATCAAGACACAAGAATAAGACAAG	GTTATATACTATTTATATAAACTAAGATCAAGACACAAGAATAAGACAAG
5	TGCTGTGACGGCCTGCATGCTTCATTTTGAGTGGTCTGCCCGTCGGGCAT	TGCTGTGTCGGCCTGCATGCTTCATTTTGAGTGGTCTGCCCGTCGGGCAT	TGCTGTGTCGGCCTGCATGCTTCATTATGAGTGGTCTGCCCGTCGGGCAT	TGCTGTGTCGGCCTGCATACTTCATTATGAGTGGTCTGCCCGTCGGGCAT	TGATGTGTCGGCCTGCATACTTCATTATGAGTGGTCTGCCCGTCGGGCAT	TGATGTGTCGGCCTGCATACTTCATTATGAGTGGTCTACCCGTCGGGCAT	TGATGTGTCGGCCTGCATACTTAATTATGAGTGGTCTACCCGTCGGGCAT	TGATGTGTCGGCCTGAATACTTAATTATGAGTGGTCTACCCGTCGGGCAT	TGATGTGTCGGCCTGAATACTTAATTATGAGTGATCTACCCGTCGGGCAT	TGATGAGTCGGCCTGAATACTTAATTATGAGTGATCTACCCGTCGGGCAT	TGATGAGTCGGACTGAATACTTAATTATGAGTGATCTACCCGTCGGGCAT	TGATGAGTCGAACTGAATACTTAATTATGAGTGATCTACCCGTCGGGCAT	TGATGAGTCGAACTGACTACTTAATTATGAGTGATCTACCCGTCGGGCAT	TGATGAGTCGAACTGACTACTTAACTATGAGTGATCTACCCGTCGGGCAT	TGATGAGTCGAACTGACTACTTAACTATGAGTGATCAACCCGTCGGGCAT	TGATGAGTCGAACTGACTACATAACTATGAGTGATCAACCCGTCGGGCAT	TGATGAGTCGAACTGACTACATAACTATGAGTGATCAACCCGTCGGGAAT	TGATGAGTCGAACTGACTACATAACTATGAGTGATCAAGCCGTCGGGAAT	TGATGAGTCGAACTGACTACATAACTATGAGTGATCAAGCCGTCGGGAAG	TGATGAGTCGAACTGACTACATAACTATGAGTGATCAAGCCGTCGGCAAG	TGATGAGTCGAACTGACTACATAACTATGAGTGATCAAGCCGACGGCAAG	TGATGAGTCGAACTGACTACATAACTATGAGTGATCAAGCCGACGACAAG	TGATGAGTCGAACTGACTACATAACTATGAGTGATCAAGCCTACGACAAG	TGATGAGTCGAACTGACTACATAACTATGAGTGATCAAGACTACGACAAG	TGATGAGTCGAACTGACTACATAACTATGAGTGATCAAGACTACTACAAG	TGATGAGTCGAACTGACTACATAACTATGAGTGAACAAGACTACTACAAG	TGATGAGTCGAACTGACTACATAACTATGAGTAAACAAGACTACTACAAG	TGATGAGTCGAACTGACTACATAACTATGACTAAACAAGACTACTACAAG	TGACGAGTCGAACTGACTACATAACTATGACTAAACAAGACTACTACAAG	AGACGAGTCGAACTGACTACATAACTATGACTAAACAAGACTACTACAAG	AGACAAGTCGAACTGACTACATAACTATGACTAAACAAGACTACTACAAG	AGACAAGTCCAACTGACTACATAACTATGACTAAACAAGACTACTACAAG	AGAAAAGTCCAACTGACTACATAACTATGACTAAACAAGACTACTACAAG	AGAAAAGTCCAACTGACTACAAAACTATGACTAAACAAGACTACTACAAG	AGAAAAGTCCAACTGACTACAAAGCTATGACTAAACAAGACTACTACAAG	AGAAAAGTCCAAGTGACTACAAAGCTATGACTAAACAAGACTACTACAAG	AGAAAAGTCCAAGTGACTACAAAGCCATGACTAAACAAGACTACTACAAG	AGAAAAGTCCAAGTGACTACAAAGACATGACTAAACAAGACTACTACAAG	AGAAAAGTCCAAGTGACTACAAAGACAAGACTAAACAAGACTACTACAAG	AGAAAAGTCCAAGTGACTACAAAGACAAGACTACACAAGACTACTACAAG	AGAAAAGTCCAAGTGACTACAAAGACAAGATTACACAAGACTACTACAAG
6	ATACGCGATCTACACGGTCTTGCACAAGACAGGTGCTGATGGCGGTGAGA	ATACGCGATCTACACAGTCTTGCACAAGACAGGTGCTGATGGCGGTGAGA	ATACGCGATCTACACAGTCTTGCACAAGACAGGTGCTGATGGCGATGAGA	ATACGCGATCTACACAGTCTTACACAAGACAGGTGCTGATGGCGATGAGA	ATACGCGATCTACACAGTCTTACACAAGACAAGTGCTGATGGCGATGAGA	AGACGCGATCTACACAGTCTTACACAAGACAAGTGCTGATGGCGATGAGA	AGACACGATCTACACAGTCTTACACAAGACAAGTGCTGATGGCGATGAGA	AGACAAGATCTACACAGTCTTACACAAGACAAGTGCTGATGGCGATGAGA	AGACAAGAACTACACAGTCTTACACAAGACAAGTGCTGATGGCGATGAGA	AGACAAGAACTACACAGTCTTACACAAGACAAGTACTGATGGCGATGAGA	AGACAAGAACTACACAGTCTTACACAAGACAAGTACTAATGGCGATGAGA	AGACAAGAACTACACAGTCTTACACAAGACAAGTACTAATGGCGATGACA	AGACAAGAACTACAAAGTCTTACACAAGACAAGTACTAATGGCGATGACA	AGACAAGAACTACAAAGTCTTACACAAGACAAGTATTAATGGCGATGACA	AGACAAGAACTACAAAGACTTACACAAGACAAGTATTAATGGCGATGACA	AGACAAGAACTACAAAGACTTACACAAGACAAGTATTAATGGCAATGACA	AGACAAGAACTACAAAGATTTACACAAGACAAGTATTAATGGCAATGACA	AGACAAGAACTACAAAGATTTACACAAGACAAGTATTAATGACAATGACA	AGACAAGAACTACAAAGATTTACACAAGACAAGTATTAATTACAATGACA	AGACAAGAACTACAAAGATTTACACAAGACAAGTATTAATTACAAAGACA	AGACAAGAACTACAAAGATTTATACAAGACAAGTATTAATTACAAAGACA	AGACAAGAACTACAAAGATATATACAAGACAAGTATTAATTACAAAGACA	AGACAAGAACTACAAAGATATATACAAGACAAGTATTAATTACAAAGATA	AGACAAGAACTACAAAGTTATATACAAGACAAGTATTAATTACAAAGATA	AGACAAGAACTACAAAGTTATATACAAGACAAGTATTAATTACAAAGATA	AGACAAGAACTACAAAGTTATATACAAGACAAGTATTAATTACAAAGATA	AGACAAGAACTACAAAGTTATATACAAGACAAGTATTAATTACAAAGATA	AGACAAGAACTACAAAGTTATATACAAGACAAGTATTAATTACAAAGATA	AGACAAGAACTACAAAGTTATATACAAGACAAGTATTAATTACAAAGATA	AGACAAGAACTACAAAGTTATATACAAGACAAGTATTAATTACAAAGATA	AGACAAGAACTACAAAGTTATATACAAGACAAGTATTAATTACAAAGATA	AGACAAGAACTACAAAGTTATATACAAGACAAGTATTAATTACAAAGATA	AGACAAGAACTACAAAGTTATATACAAGACAAGTATTAATTACAAAGATA	AGACAAGAACTACAAAGTTATATACAAGACAAGTATTAATTACAAAGATA	AGACAAGAACTACAAAGTTATATACAAGACAAGTATTAATTACAAAGATA	AGACAAGAACTACAAAGTTATATACAAGACAAGTATTAATTACAAAGATA	AGACAAGAACTACAAAGTTATATACAAGACAAGTATTAATTACAAAGATA	AGACAAGAACTACAAAGTTATATACAAGACAAGTATTAATTACAAAGATA	AGACAAGAACTACAAAGTTATATACAAGACAAGTATTAATTACAAAGATA	AGACAAGAACTACAAAGTTATATACAAGACAAGTATTAATTACAAAGATA	AGACAAGAACTACAAAGTTATATACAAGACAAGTATTAATTACAAAGATA
7	CTCCGAACAAGACTACACCTATCGAACTCGTCCGACAATCCATAATCACC	CTCCGAACAAGACTACACCTATCGAACTCGTCCGACAATCCATAATGACC	CTACGAACAAGACTACACCTATCGAACTCGTCCGACAATCCATAATGACC	CTACGAACAAGACTACAACTATCGAACTCGTCCGACAATCCATAATGACC	CTACGAACAAGACTACAACTATAGAACTCGTCCGACAATCCATAATGACC	CTACGAACAAGACTACAACTATAGAACTCGTCCTACAATCCATAATGACC	CTACGAACAAGACTACAACTATATAACTCGTCCTACAATCCATAATGACC	CTACGAACAAGACTACAACTATATAACTAGTCCTACAATCCATAATGACC	CTACGAACAAGACTACAACTATATAACAAGTCCTACAATCCATAATGACC	CTACGAACAAGACTACAACTATATAACAAGTCCTACAAACCATAATGACC	CTACGAACAAGACTACAACTATATAACAAGTCCTACAAACCATAATGACA	CTACAAACAAGACTACAACTATATAACAAGTCCTACAAACCATAATGACA	CTACATACAAGACTACAACTATATAACAAGTCCTACAAACCATAATGACA	CTACATACAAGATTACAACTATATAACAAGTCCTACAAACCATAATGACA	TTACATACAAGATTACAACTATATAACAAGTCCTACAAACCATAATGACA	TTACATACAAGATTACAACTATATAACAAGTCCTACAAATCATAATGACA	TTACATACAAGATTACAACTATATAACAAGACCTACAAATCATAATGACA	TTACATACAAGATTACAACTATATAACAAGAACTACAAATCATAATGACA	TTACATACAAGATTACAACTATATAACAAGAACTACAAATAATAATGACA	TTACATACAAGATTACAACTATATAACAAGAACTACAAATAAAAATGACA	TTACATACAAGATTACAACTATATAACAAGAACTACAAATAAAGATGACA	TTACATACAAGATTACAACTATATAACAAGAACTACAAATAAAGATGACT	TTACATACAAGATTAAAACTATATAACAAGAACTACAAATAAAGATGACT	TTACATACAAGATTAAAATTATATAACAAGAACTACAAATAAAGATGACT	TTACATACAAGATTAAAATTATATAACAAGAACTACAAATAAAGATGACT	TTACATACAAGATTAAAATTATATAACAAGAACTACAAATAAAGATGACT	TTACATACAAGATTAAAATTATATAACAAGAACTACAAATAAAGATGACT	TTACATACAAGATTAAAATTATATAACAAGAACTACAAATAAAGATGACT	TTACATACAAGATTAAAATTATATAACAAGAACTACAAATAAAGATGACT	TTACATACAAGATTAAAATTATATAACAAGAACTACAAATAAAGATGACT	TTACATACAAGATTAAAATTATATAACAAGAACTACAAATAAAGATGACT	TTACATACAAGATTAAAATTATATAACAAGAACTACAAATAAAGATGACT	TTACATACAAGATTAAAATTATATAACAAGAACTACAAATAAAGATGACT	TTACATACAAGATTAAAATTATATAACAAGAACTACAAATAAAGATGACT	TTACATACAAGATTAAAATTATATAACAAGAACTACAAATAAAGATGACT	TTACATACAAGATTAAAATTATATAACAAGAACTACAAATAAAGATGACT	TTACATACAAGATTAAAATTATATAACAAGAACTACAAATAAAGATGACT	TTACATACAAGATTAAAATTATATAACAAGAACTACAAATAAAGATGACT	TTACATACAAGATTAAAATTATATAACAAGAACTACAAATAAAGATGACT	TTACATACAAGATTAAAATTATATAACAAGAACTACAAATAAAGATGACT	TTACATACAAGATTAAAATTATATAACAAGAACTACAAATAAAGATGACT
8	TTCTGTGGCACCAAATTCTAAACGTATGCCGTGTCCACCCATGCGCCTTT	TTCTGTGGCACCAAATGCTAAACGTATGCCGTGTCCACCCATGCGCCTTT	TTCTGTGGCACAAAATGCTAAACGTATGCCGTGTCCACCCATGCGCCTTT	TTCTGTGGCACAAAATGCTAAACGTATCCCGTGTCCACCCATGCGCCTTT	TTCTGTGGCACAAAATGCTAAACGTATCCCGTGTCCACCCATTCGCCTTT	TTCTGTAGCACAAAATGCTAAACGTATCCCGTGTCCACCCATTCGCCTTT	TACTGTAGCACAAAATGCTAAACGTATCCCGTGTCCACCCATTCGCCTTT	TACTGTAGCACAAAATGCTAAACGTATCCCGTGTCCACCCATTCGCCATT	TACTGTAGCACAAAATGCTAAACGTATCCCGTGTCCACCCATTCGCCATG	TACTGTAGCACAAAATGCTAAACGAATCCCGTGTCCACCCATTCGCCATG	TACTGTAGCACAAAATGCTAAACAAATCCCGTGTCCACCCATTCGCCATG	TACTGTAGCACAAAATGCTAAACAAATCCCGTGTCCACCGATTCGCCATG	TACTATAGCACAAAATGCTAAACAAATCCCGTGTCCACCGATTCGCCATG	TACAATAGCACAAAATGCTAAACAAATCCCGTGTCCACCGATTCGCCATG	TACAATAACACAAAATGCTAAACAAATCCCGTGTCCACCGATTCGCCATG	TACAATAAGACAAAATGCTAAACAAATCCCGTGTCCACCGATTCGCCATG	TACAATAAGACAAAATGCTAAACAAATCCCGTGTACACCGATTCGCCATG	TACAATAAGACAAAATGCTAAACAAATCCCGTGTACAACGATTCGCCATG	TACAATAAGACAAAATGCTAAACAAATCCCGTGTACAAAGATTCGCCATG	TACAATAAGACAAAATGCTAAACAAATCCCGTGTACAAAGATTCACCATG	TACAATAAGACAAAATGCTAAACAAATCCCGTGTACAAAGATTCACTATG	TACAATAAGACAAAATGCTAAACAAATCCCGTGTACAAAGATTTACTATG	TACAATAAGACAAAATGCTAAACAAATCCCGTGTACAAAGATTTACTACG	TACAATAAGACAAAATGCTAAACAAATCCCGTCTACAAAGATTTACTACG	TACAATAAGACAAAATGCTAAACAAATCCCATCTACAAAGATTTACTACG	TACAATAAGACAAAATGCTAAACAAGTCCCATCTACAAAGATTTACTACG	TACAATAAGACAAAATGCTAAACAAGTCCAATCTACAAAGATTTACTACG	TACAATAAGACAAAATGCTAAACAAGTCCAAACTACAAAGATTTACTACG	TACAATAAGACAAAATGCTAAACAAGTCTAAACTACAAAGATTTACTACG	TACAATAAGACAAAATGCTAAACAAGACTAAACTACAAAGATTTACTACG	TACAATAAGACAAAATGCTAAACAAGACTAAACTACAAATATTTACTACG	TACAATAAGACAAAATGCTAAACAAGACTAAACTACAAATTTTTACTACG	TACAACAAGACAAAATGCTAAACAAGACTAAACTACAAATTTTTACTACG	TACAACAAGACAAGATGCTAAACAAGACTAAACTACAAATTTTTACTACG	TACTACAAGACAAGATGCTAAACAAGACTAAACTACAAATTTTTACTACG	TACTACAAGACAAGATGTTAAACAAGACTAAACTACAAATTTTTACTACG	TACTACAAGACAAGATGTTACACAAGACTAAACTACAAATTTTTACTACG	TACTACAAGACAAGATATTACACAAGACTAAACTACAAATTTTTACTACG	TACTACAAGACAAGAAATTACACAAGACTAAACTACAAATTTTTACTACG	TACTACAAGACAAGAAATTACACAAGACTAAACTACAAATATTTACTACG	TACTACAAGACAAGAAACTACACAAGACTAAACTACAAATATTTACTACG
9	AGGCGAGGCTGTGTCTCCAGCAATGTGCCAACGATCAGATGTTAGCCACT	AGGCGAGGCTGTGTCTCCAGCAATTTGCCAACGATCAGATGTTAGCCACT	AGGCGAGACTGTGTCTCCAGCAATTTGCCAACGATCAGATGTTAGCCACT	AGACGAGACTGTGTCTCCAGCAATTTGCCAACGATCAGATGTTAGCCACT	AGACAAGACTGTGTCTCCAGCAATTTGCCAACGATCAGATGTTAGCCACT	AGACAAGACTGTGTCTCCAGCAATTTGCCAACGATCAGATGTTAGCTACT	AGACAAGACTGTGTCTCCAGCAATTTGCCAACGATAAGATGTTAGCTACT	AGACAAGACTGTGTCTCAAGCAATTTGCCAACGATAAGATGTTAGCTACT	AGACAAGACTGTGTATCAAGCAATTTGCCAACGATAAGATGTTAGCTACT	AGACAAGACTGTGTATCAAGCAATTTACCAACGATAAGATGTTAGCTACT	AGACAAGACTGTGTATCAAGCAATTTACAAACGATAAGATGTTAGCTACT	AGACAAGACAGTGTATCAAGCAATTTACAAACGATAAGATGTTAGCTACT	AGACAAGACAGTGTATCAAGCAATTTACAAACGATAAGATATTAGCTACT	AGACAAGACAGTGTATCAAGCAATTTACAAACGATAAGATATTAACTACT	AGACAAGACAGTGTATCAAGCAATTTACAAACGATAAGATATAAACTACT	AGACAAGACAGTGTATCAAGCTATTTACAAACGATAAGATATAAACTACT	AGACAAGACAGTGTATCAAGCTATATACAAACGATAAGATATAAACTACT	AGACAAGACAGTGCATCAAGCTATATACAAACGATAAGATATAAACTACT	AGACAAGACAGTCCATCAAGCTATATACAAACGATAAGATATAAACTACT	AGACAAGACAGTCCATCAAGCTATATACAAACGATAAGATATATACTACT	AGACAAGACAGTCCATCAAGCTATATACAAACTATAAGATATATACTACT	AGACAAGACAGTCCATCAAGCTATATACAAACTACAAGATATATACTACT	AGACAAGACAGTCCATCAAGCTATATATAAACTACAAGATATATACTACT	AGACAAGACAGTCCATCAAGCTATATATAAAATACAAGATATATACTACT	AGACAAGACAGTCCATCAAGCTATATATATAATACAAGATATATACTACT	AGACAAGACAGTCCATCAAGCTATATATATAAAACAAGATATATACTACT	AGACAAGACAGTCCAACAAGCTATATATATAAAACAAGATATATACTACT	AGACAAGACAGTCCAAGAAGCTATATATATAAAACAAGATATATACTACT	AGACAAGACAATCCAAGAAGCTATATATATAAAACAAGATATATACTACT	AGACAAGACAAGCCAAGAAGCTATATATATAAAACAAGATATATACTACT	AGACAAGACAAGCAAAGAAGCTATATATATAAAACAAGATATATACTACT	AGACAAGACAAGCAAAGAAACTATATATATAAAACAAGATATATACTACT	AGACAATACAAGCAAAGAAACTATATATATAAAACAAGATATATACTACT	AGACTATACAAGCAAAGAAACTATATATATAAAACAAGATATATACTACT	AGACTATACAAGCAAAGAAACTATATATATAAAACAAGATATATACTACT	AGACTATACAAGCAAAGAAACTATATATATAAAACAAGATATATACTACT	AGACTATACAAGCAAAGAAACTATATATATAAAACAAGATATATACTACT	AGACTATACAAGCAAAGAAACTATATATATAAAACAAGATATATACTACT	AGACTATACAAGCAAAGAAACTATATATATAAAACAAGATATATACTACT	AGACTATACAAGCAAAGAAACTATATATATAAAACAAGATATATACTACT	AGACTATACAAGCAAAGAAACTATATATATAAAACAAGATATATACTACT
10	GTCATCGCACTTGCGAGTATCCCCATCTACTTGGTGAGCCTGCCCCTCTA	GTCATCGCACTTGCGAGTATCCCCATCTACTTGGTGAGCCTGCCCCTATA	GTCATCGCACTTGCGAGTATCCCCATCTACTTGGTGAGCCTACCCCTATA	GTCATCGCACTAGCGAGTATCCCCATCTACTTGGTGAGCCTACCCCTATA	GTCATCGCACTAGCGAGTATCCCCATCTACTTAGTGAGCCTACCCCTATA	GTCATCGCACTAGCGAGTATCCCCATCTACTTAGTGAGCCTACCACTATA	GTCATCGCACTAGCGAGTATCCCCATCTACTTAGTGAGCCTACCACTACA	GTCATCACACTAGCGAGTATCCCCATCTACTTAGTGAGCCTACCACTACA	GTCATCACACTAGCGAGTATCCCCATCTACTTAGTGAGACTACCACTACA	GTCATCACACTAGCGAGTATCCCCATCTACTTAGTAAGACTACCACTACA	GTCATCACACTAGCGAGTATCCCCATCTACTTAGTAAGACTACAACTACA	GTCATCACACTAGCGAGTATCCCCATCTACTTACTAAGACTACAACTACA	GTCATCACACTAGCGAGTATCCCTATCTACTTACTAAGACTACAACTACA	GTCATCACACTAGCGAGTATCCCTATTTACTTACTAAGACTACAACTACA	GTCATCACACTAGCGAGTATCCCTATTTATTTACTAAGACTACAACTACA	GTCATCACACTAGCGAGTATACCTATTTATTTACTAAGACTACAACTACA	GTCATCACACTAGCGAGTATACATATTTATTTACTAAGACTACAACTACA	GTCATCACACTAGCAAGTATACATATTTATTTACTAAGACTACAACTACA	GTCATCACACTAACAAGTATACATATTTATTTACTAAGACTACAACTACA	GTCATCACACTAACAAGTATACATATTTATTTACTAAGACTACAACTACG	GTCATCACACTAACAAGTATACATATTTATTTACAAAGACTACAACTACG	GTCATCACACTAACAAGTATACATATTTATTTACAAAGACTACTACTACG	GTCATCACACTAACAAGTATACATATTTATTTACAAAGACTACTACTAAG	GTCATCACACTAACAAGTATACATATTTATTTACAAAGACTACTATTAAG	GTCATCACACTAACAAGAATACATATTTATTTACAAAGACTACTATTAAG	GTCATCACACTAACAAGACTACATATTTATTTACAAAGACTACTATTAAG	GTCATCACACTAAGAAGACTACATATTTATTTACAAAGACTACTATTAAG	GTCATCACACTAAGAAAACTACATATTTATTTACAAAGACTACTATTAAG	GTCATCACACTAAGTAAACTACATATTTATTTACAAAGACTACTATTAAG	GTCATCACAGTAAGTAAACTACATATTTATTTACAAAGACTACTATTAAG	GTCATCAAAGTAAGTAAACTACATATTTATTTACAAAGACTACTATTAAG	GTCATCAAAGTAAGTAAACTACATATTTATTTACAAAGACTACTATTAAG	GTCATCAAAGTAAGTAAACTACATATTTATTTACAAAGACTACTATTAAG	GTCATCAAAGTAAGTAAACTACATATTTATTTACAAAGACTACTATTAAG	GTCATCAAAGTAAGTAAACTACATATTTATTTACAAAGACTACTATTAAG	GTCATCAAAGTAAGTAAACTACATATTTATTTACAAAGACTACTATTAAG	GTCATCAAAGTAAGTAAACTACATATTTATTTACAAAGACTACTATTAAG	GTCATCAAAGTAAGTAAACTACATATTTATTTACAAAGACTACTATTAAG	GTCATCAAAGTAAGTAAACTACATATTTATTTACAAAGACTACTATTAAG	GTCATCAAAGTAAGTAAACTACATATTTATTTACAAAGACTACTATTAAG	GTCATCAAAGTAAGTAAACTACATATTTATTTACAAAGACTACTATTAAG
11	TTTAATGTACGTGATATAATGTTAGCTAAGAATGCCCAATCAACGCCAAT	TTTAATGTACGTGATATAATGTTAGCTAAGAATCCCCAATCAACGCCAAT	TTTAATGTACGTGATATAAAGTTAGCTAAGAATCCCCAATCAACGCCAAT	TTTACTGTACGTGATATAAAGTTAGCTAAGAATCCCCAATCAACGCCAAT	TTTACTGTACGTGATATAAAGTTAGCTAAGAATCCCCAATCAACGCCAAG	TTTACTGTACGTGATATAAAGTTAGCTAAGAATCCCCAATCAAAGCCAAG	TTTACTGTACGTGATATAAAGTTAGCTAAGAATCCCCAAGCAAAGCCAAG	TTTACTGTACGTGATATAAAGTTAGCTAAGAATCACCAAGCAAAGCCAAG	TTTACTGTACGTGATATAAAGTTAGATAAGAATCACCAAGCAAAGCCAAG	TTTACTGTACGTGATATAAAGTTATATAAGAATCACCAAGCAAAGCCAAG	TTTACTGTACGTTATATAAAGTTATATAAGAATCACCAAGCAAAGCCAAG	TTTACTGTACGTTATATAAAGTTATATAAGAATCAACAAGCAAAGCCAAG	TTTACTGTACGTTATATAAAGTTATATAAGAATCAACAAGCAAAGACAAG	TTTACTGTACGTTATATAAAGTTATATAAGAATCTACAAGCAAAGACAAG	TTTACTGTAAGTTATATAAAGTTATATAAGAATCTACAAGCAAAGACAAG	TTTACTGCAAGTTATATAAAGTTATATAAGAATCTACAAGCAAAGACAAG	TTTACTACAAGTTATATAAAGTTATATAAGAATCTACAAGCAAAGACAAG	TTTACTACAAGTTATATAAAGTTATATAAGAAACTACAAGCAAAGACAAG	TTTACTACAAGTTATATAAAGTTATACAAGAAACTACAAGCAAAGACAAG	TTTACTACAAGTTATATAAATTTATACAAGAAACTACAAGCAAAGACAAG	TTTACTACAAGTTATATAAATTTATACAAGAAACTACAAGAAAAGACAAG	TTTACTACAAGTTATATAAATTTATACAAGAAACTACAAGACAAGACAAG	TTTCCTACAAGTTATATAAATTTATACAAGAAACTACAAGACAAGACAAG	TTCCCTACAAGTTATATAAATTTATACAAGAAACTACAAGACAAGACAAG	GTCCCTACAAGTTATATAAATTTATACAAGAAACTACAAGACAAGACAAG	GTCCCTACAAGCTATATAAATTTATACAAGAAACTACAAGACAAGACAAG	GTCCCTACAAACTATATAAATTTATACAAGAAACTACAAGACAAGACAAG	GTCCATACAAACTATATAAATTTATACAAGAAACTACAAGACAAGACAAG	GTACATACAAACTATATAAATTTATACAAGAAACTACAAGACAAGACAAG	TTACATACAAACTATATAAATTTATACAAGAAACTACAAGACAAGACAAG	TTACATACAAACTATATAAATTTATACAAGAAACTACAAGACAAGACAAG	TTACATACAAACTATATAAATTTATACAAGAAACTACAAGACAAGACAAG	TTACATACAAACTATATAAATTTATACAAGAAACTACAAGACAAGACAAG	TTACATACAAACTATATAAATTTATACAAGAAACTACAAGACAAGACAAG	TTACATACAAACTATATAAATTTATACAAGAAACTACAAGACAAGACAAG	TTACATACAAACTATATAAATTTATACAAGAAACTACAAGACAAGACAAG	TTACATACAAACTATATAAATTTATACAAGAAACTACAAGACAAGACAAG	TTACATACAAACTATATAAATTTATACAAGAAACTACAAGACAAGACAAG	TTACATACAAACTATATAAATTTATACAAGAAACTACAAGACAAGACAAG	TTACATACAAACTATATAAATTTATACAAGAAACTACAAGACAAGACAAG	TTACATACAAACTATATAAATTTATACAAGAAACTACAAGACAAGACAAG
12	GAATAAAATGCTCTGAACTTGTACGAACAGGTAGGTCAACAGAGCTAACT	GAATAAAATACTCTGAACTTGTACGAACAGGTAGGTCAACAGAGCTAACT	GAATAAAATACTCTGAACTTCTACGAACAGGTAGGTCAACAGAGCTAACT	GAATAAAATACTCTGAACTTCTACGAACAGGTAGGTCAAGAGAGCTAACT	GAATAAAATACTCTGAACTTCTACGAACAGATAGGTCAAGAGAGCTAACT	GAATAAAATACTCTGAACTACTACGAACAGATAGGTCAAGAGAGCTAACT	GAATAAAATACTCTAAACTACTACGAACAGATAGGTCAAGAGAGCTAACT	GAATAAACTACTCTAAACTACTACGAACAGATAGGTCAAGAGAGCTAACT	AAATAAACTACTCTAAACTACTACGAACAGATAGGTCAAGAGAGCTAACT	AGATAAACTACTCTAAACTACTACGAACAGATAGGTCAAGAGAGCTAACT	AGATAAACTACTATAAACTACTACGAACAGATAGGTCAAGAGAGCTAACT	AGATATACTACTATAAACTACTACGAACAGATAGGTCAAGAGAGCTAACT	AGATATACTACTATAAACTACTACGAACAGATAGGTCAAGAGAGATAACT	AGATATACTACTATAAACTACTACGAACAGATAGGTCAAGAGAGATGACT	AGATATACTACTATAAACTACTACTAACAGATAGGTCAAGAGAGATGACT	AGATATACTACTATAAACTACTACTAACAGATAGGTCAAGAAAGATGACT	AGATATACTACTATAAACTACTACTAAGAGATAGGTCAAGAAAGATGACT	AGATATACTACTATAAACTACTACTAAGAGAAAGGTCAAGAAAGATGACT	AGATATACTACTATAAACTACTACTAAGAGAAAAGTCAAGAAAGATGACT	AGATATACTACTATAAACTACTACTAAGACAAAAGTCAAGAAAGATGACT	AGATATACTACTATAAACTACTACTAAGACAAGAGTCAAGAAAGATGACT	AGATATACTACTATAAACTACTACTAAGACAAGAATCAAGAAAGATGACT	AGATATACTACTATAAACTACTACTAAGACAAGAAACAAGAAAGATGACT	AGACATACTACTATAAACTACTACTAAGACAAGAAACAAGAAAGATGACT	AGACATACTACTATAAACTACTACTAAGACAAGACACAAGAAAGATGACT	AGACATACTACTATAAACTACTACTAAGACAAGACACAAGAAAGATGACT	AGACATACTACTATAAACTACTACTAAGACAAGACACAAGAAAGATGACT	AGACATACTACTATAAACTACTACTAAGACAAGACACAAGAAAGATGACT	AGACATACTACTATAAACTACTACTAAGACAAGACACAAGAAAGATGACT	AGACATACTACTATAAACTACTACTAAGACAAGACACAAGAAAGATGACT	AGACATACTACTATAAACTACTACTAAGACAAGACACAAGAAAGATGACT	AGACATACTACTATAAACTACTACTAAGACAAGACACAAGAAAGATGACT	AGACATACTACTATAAACTACTACTAAGACAAGACACAAGAAAGATGACT	AGACATACTACTATAAACTACTACTAAGACAAGACACAAGAAAGATGACT	AGACATACTACTATAAACTACTACTAAGACAAGACACAAGAAAGATGACT	AGACATACTACTATAAACTACTACTAAGACAAGACACAAGAAAGATGACT	AGACATACTACTATAAACTACTACTAAGACAAGACACAAGAAAGATGACT	AGACATACTACTATAAACTACTACTAAGACAAGACACAAGAAAGATGACT	AGACATACTACTATAAACTACTACTAAGACAAGACACAAGAAAGATGACT	AGACATACTACTATAAACTACTACTAAGACAAGACACAAGAAAGATGACT	AGACATACTACTATAAACTACTACTAAGACAAGACACAAGAAAGATGACT
13	CAAGATATAAGCATACTTTCGGGGGCTGGCTAGAACTCGACAAGTGCGTT	CAAGATATAAGCATACTTTCGGAGGCTGGCTAGAACTCGACAAGTGCGTT	CAAGATATAAGCATACTTTCGGAGGCTGGCTAGAACTCGACATGTGCGTT	CAAGATATAAGAATACTTTCGGAGGCTGGCTAGAACTCGACATGTGCGTT	CAAGATATAAGAATAATTTCGGAGGCTGGCTAGAACTCGACATGTGCGTT	CAAGATACAAGAATAATTTCGGAGGCTGGCTAGAACTCGACATGTGCGTT	CAAGATACAAGAATAATTTCGGAGGCTGGCTAGAACTCGACATGAGCGTT	CAAGATACAAGAATAATTTCGGAGGCTGACTAGAACTCGACATGAGCGTT	CAAGATACAAGAATAATTTCGGAGGCTGACTACAACTCGACATGAGCGTT	CAAGATACAAGAATAATTTCGAAGGCTGACTACAACTCGACATGAGCGTT	CAAGATACAAGAATAATTTCGAAGACTGACTACAACTCGACATGAGCGTT	CAAGATACAAGAATAATTACGAAGACTGACTACAACTCGACATGAGCGTT	CAAGATACAAGAATAATTACGAAGACTGACTACAACTAGACATGAGCGTT	CAAGATACAAGAATAATTACGAAGACTAACTACAACTAGACATGAGCGTT	CAAGATACAAGAATAATTACGAAGACTAACTACAAATAGACATGAGCGTT	CAAGATACAAGAATAACTACGAAGACTAACTACAAATAGACATGAGCGTT	CAAGATACAAGAATTACTACGAAGACTAACTACAAATAGACATGAGCGTT	CAAGATACAAGAATTACTACGAAGATTAACTACAAATAGACATGAGCGTT	CAAGATACAAGAATTACTACGAAGATTAACTACAAATAAACATGAGCGTT	CAAGATACAAGAATTACTACTAAGATTAACTACAAATAAACATGAGCGTT	CAAGATACAAGAATTACTACTAAGATAAACTACAAATAAACATGAGCGTT	CAAGATACAAGAATTACTACTAAGATAAACTACAAATAAAGATGAGCGTT	CAAGATACAAGAATTACTACTAAGATAAACTACAAATAAAGATGAACGTT	CAAGACACAAGAATTACTACTAAGATAAACTACAAATAAAGATGAACGTT	CAAGACACAAGAATTACTACTAAGATAAACTACAAATAAAGATGAACGTT	CAAGACACAAGAATTACTACTAAGATAAACTACAAATAAAGATGAACGTT	CAAGACACAAGAATTACTACTAAGATAAACTACAAATAAAGATGAACGTT	CAAGACACAAGAATTACTACTAAGATAAACTACAAATAAAGATGAACGTT	CAAGACACAAGAATTACTACTAAGATAAACTACAAATAAAGATGAACGTT	CAAGACACAAGAATTACTACTAAGATAAACTACAAATAAAGATGAACGTT	CAAGACACAAGAATTACTACTAAGATAAACTACAAATAAAGATGAACGTT	CAAGACACAAGAATTACTACTAAGATAAACTACAAATAAAGATGAACGTT	CAAGACACAAGAATTACTACTAAGATAAACTACAAATAAAGATGAACGTT	CAAGACACAAGAATTACTACTAAGATAAACTACAAATAAAGATGAACGTT	CAAGACACAAGAATTACTACTAAGATAAACTACAAATAAAGATGAACGTT	CAAGACACAAGAATTACTACTAAGATAAACTACAAATAAAGATGAACGTT	CAAGACACAAGAATTACTACTAAGATAAACTACAAATAAAGATGAACGTT	CAAGACACAAGAATTACTACTAAGATAAACTACAAATAAAGATGAACGTT	CAAGACACAAGAATTACTACTAAGATAAACTACAAATAAAGATGAACGTT	CAAGACACAAGAATTACTACTAAGATAAACTACAAATAAAGATGAACGTT	CAAGACACAAGAATTACTACTAAGATAAACTACAAATAAAGATGAACGTT
14	AATGGGCAACAATATCCGACTTATGCTTGGAACGACATATCCGAGGTCTG	AATGGGCAACAATGTCCGACTTATGCTTGGAACGACATATCCGAGGTCTG	AATAGGCAACAATGTCCGACTTATGCTTGGAACGACATATCCGAGGTCTG	AATAGGCAACAATGTCCGACTTATGCTTGGAACGACATATCCGAGGTATG	AATAGGCAACAATGTCCGACTTATGCATGGAACGACATATCCGAGGTATG	AAGAGGCAACAATGTCCGACTTATGCATGGAACGACATATCCGAGGTATG	AAGAGGCAACAATGTCCGACTTATCCATGGAACGACATATCCGAGGTATG	AAGAGGCAACAATGTCCGACTTATCCATGGAACAACATATCCGAGGTATG	AAGAGGCAACAATGTCAGACTTATCCATGGAACAACATATCCGAGGTATG	AAGAGGCAACAATGACAGACTTATCCATGGAACAACATATCCGAGGTATG	AAGAGGCAACAATGACAGACTTATCTATGGAACAACATATCCGAGGTATG	AAGAGGCAACAATGACAGACTTATCTATGGAACAACATATCAGAGGTATG	AAGAGGCAACAATGACAGACTTATCTATGGAACAACATATAAGAGGTATG	AAGAGGCAACAATGACAGACTTATCTATGGAACAACATACAAGAGGTATG	AAGAGGCAACAATGACAGACTTATCTATGGAACAACATACAAGAGGTAAG	AAGAGGCAACAATGACAGACTTATCTATGGAACAACATACAAGAGATAAG	AAGAGGCAACAATGACAGACTTATCTATGAAACAACATACAAGAGATAAG	AAGAGGCAACAATGACAGACTTATCTATGAAACAAAATACAAGAGATAAG	AAGAAGCAACAATGACAGACTTATCTATGAAACAAAATACAAGAGATAAG	AAGAAGCAACGATGACAGACTTATCTATGAAACAAAATACAAGAGATAAG	AAGAAGCAACGATGACAGACATATCTATGAAACAAAATACAAGAGATAAG	AAGAAGCAACGATGACAGACAAATCTATGAAACAAAATACAAGAGATAAG	AAGAAGCAACGATGACAGACAAATCTATGAAACAAAAGACAAGAGATAAG	AAGAAGCAACGATGACAGACAAATCTATGAAACAAAAGACAAGAAATAAG	AAGAAGCAACGATGACAGACAAATCTATGAAACAAAAGTCAAGAAATAAG	AAGAAGCAACGATGACAGACAAATCTATGACACAAAAGTCAAGAAATAAG	AAGAAGCAACGATGACAGACAAATCTATGACACAAAAGTCAAGAAATAAG	AAGAAGCAACGATGACAGACAAATCTATGACACAAAAGTCAAGAAATAAG	AAGAAGCAACGATGACAGACAAATCTATGACACAAAAGTCAAGAAATAAG	AAGAAGCAACGATGACAGACAAATCTATGACACAAAAGTCAAGAAATAAG	AAGAAGCAACGATGACAGACAAATCTATGACACAAAAGTCAAGAAATAAG	AAGAAGCAACGATGACAGACAAATCTATGACACAAAAGTCAAGAAATAAG	AAGAAGCAACGATGACAGACAAATCTATGACACAAAAGTCAAGAAATAAG	AAGAAGCAACGATGACAGACAAATCTATGACACAAAAGTCAAGAAATAAG	AAGAAGCAACGATGACAGACAAATCTATGACACAAAAGTCAAGAAATAAG	AAGAAGCAACGATGACAGACAAATCTATGACACAAAAGTCAAGAAATAAG	AAGAAGCAACGATGACAGACAAATCTATGACACAAAAGTCAAGAAATAAG	AAGAAGCAACGATGACAGACAAATCTATGACACAAAAGTCAAGAAATAAG	AAGAAGCAACGATGACAGACAAATCTATGACACAAAAGTCAAGAAATAAG	AAGAAGCAACGATGACAGACAAATCTATGACACAAAAGTCAAGAAATAAG	AAGAAGCAACGATGACAGACAAATCTATGACACAAAAGTCAAGAAATAAG
15	GCAGCATTAAGACTGTGACGGCTATACCGAACGTTCATTAGTGCCAGCCA	GCAGCATTAAGACTGTGACGGCTATACCGAACGTTCATTAGTGCCAGACA	GCAGCATTAAGACTGTGACGGCTATACCGAACGTTCATTAGTGCAAGACA	GCAGCATTAAGACTGTGACGGCTATACAGAACGTTCATTAGTGCAAGACA	GCAGCATTAAGACTGTGACAGCTATACAGAACGTTCATTAGTGCAAGACA	GCAGCATTAAGACTGAGACAGCTATACAGAACGTTCATTAGTGCAAGACA	GCAGCATTAAGACTAAGACAGCTATACAGAACGTTCATTAGTGCAAGACA	GCAGCATTAAGACTAAGACAGCTATATAGAACGTTCATTAGTGCAAGACA	GCAGCATTAAGACTAAGACAGCTATATAAAACGTTCATTAGTGCAAGACA	GCAGCATTAAGACTAAGACAGCTATATAAAACGTACATTAGTGCAAGACA	GCAGCATTAAGACTAAGACAGCTATATAAAACGTACATTAGTTCAAGACA	GCAGCATTAAGACTAAGACAGCTATATAAAACGTACATTAATTCAAGACA	GCAGCATCAAGACTAAGACAGCTATATAAAACGTACATTAATTCAAGACA	GAAGCATCAAGACTAAGACAGCTATATAAAACGTACATTAATTCAAGACA	CAAGCATCAAGACTAAGACAGCTATATAAAACGTACATTAATTCAAGACA	CAAGAATCAAGACTAAGACAGCTATATAAAACGTACATTAATTCAAGACA	CAAGAAACAAGACTAAGACAGCTATATAAAACGTACATTAATTCAAGACA	CAAGAAACAAGACTAAGACAGCTATATAAAACCTACATTAATTCAAGACA	CAAGAAACAAGACTAAGACAGCTATATAAAAACTACATTAATTCAAGACA	CAAGAAACAAGACTAAGACAGCTATATAAAAACTACAATAATTCAAGACA	CAAGAAACAAGACTAAGACAGCTATATAAAAACTACAATAATACAAGACA	CAAGAAACAAGACTAAGACAGCTATATAAAAACTACAATTATACAAGACA	CAAGAAACAAGACTAAGACAGCTATATAAAAACTACAATTATACAAGACT	CAAGAAACAAGACTAAGAAAGCTATATAAAAACTACAATTATACAAGACT	CAAGAAACAAGACTAAAAAAGCTATATAAAAACTACAATTATACAAGACT	CAAGAAACAAGACTAAAAAAACTATATAAAAACTACAATTATACAAGACT	CAAGAAACAAGACTAAAAAAACTATATAAGAACTACAATTATACAAGACT	CAAGAAACAAGACTAAACAAACTATATAAGAACTACAATTATACAAGACT	CAAGAAACAAGACTATACAAACTATATAAGAACTACAATTATACAAGACT	CAAGACACAAGACTATACAAACTATATAAGAACTACAATTATACAAGACT	CAAGACACAAGACTATACAAACTATATAAGAACTACAAATATACAAGACT	CAAGACACAAGATTATACAAACTATATAAGAACTACAAATATACAAGACT	CAAGACACAAGATTATACAAACTATATAAGAACTACAAATAAACAAGACT	CAAGACACAAGATTATACAAACTATATAAGAACTACAAATAAACAAGACA	CAAGACACAAGATTATACAAACTATATAAGAACTACAAATAAACAAGACA	CAAGACACAAGATTATACAAACTATATAAGAACTACAAATAAACAAGACA	CAAGACACAAGATTATACAAACTATATAAGAACTACAAATAAACAAGACA	CAAGACACAAGATTATACAAACTATATAAGAACTACAAATAAACAAGACA	CAAGACACAAGATTATACAAACTATATAAGAACTACAAATAAACAAGACA	CAAGACACAAGATTATACAAACTATATAAGAACTACAAATAAACAAGACA	CAAGACACAAGATTATACAAACTATATAAGAACTACAAATAAACAAGACA
16	CGTTGTAAGGCCTTCCCCCCGCGGCTGTAGAGTGAACCAGCACGAGCAAA	CGTTGTAAGGCCTTCCCCCCGCGACTGTAGAGTGAACCAGCACGAGCAAA	CGTTGTAAGGCCTTCCCCCCGCGACTGTAGAGTGAACCAGCACGAGCAAG	CGTTGTAAGACCTTCCCCCCGCGACTGTAGAGTGAACCAGCACGAGCAAG	CGTTGCAAGACCTTCCCCCCGCGACTGTAGAGTGAACCAGCACGAGCAAG	CGTTGCAAGACCTTCCCCCCGCGACTGTAGAGTGAACCAGCACAAGCAAG	CGTTGCAAGACCTTCCCCCCGCGACTGTAGAGTGAACAAGCACAAGCAAG	CGTTGCAAGACCTTCCCCCCGCGACTATAGAGTGAACAAGCACAAGCAAG	CGTTGCAAGACCTTCCCCCCGCGACTATAGAGTGAACAAGAACAAGCAAG	CGTTGCAAGACCTTCCCCCCGCGACTATAGAGTTAACAAGAACAAGCAAG	CGTTGCAAGACCTTCCCCCCGAGACTATAGAGTTAACAAGAACAAGCAAG	CGTTGCAAGACCTTCCCCACGAGACTATAGAGTTAACAAGAACAAGCAAG	CGTTGCAAGACCTTCCCTACGAGACTATAGAGTTAACAAGAACAAGCAAG	CGTTACAAGACCTTCCCTACGAGACTATAGAGTTAACAAGAACAAGCAAG	AGTTACAAGACCTTCCCTACGAGACTATAGAGTTAACAAGAACAAGCAAG	AGTTACAAGACCTTCCCTACAAGACTATAGAGTTAACAAGAACAAGCAAG	AGTTACAAGACCTTCCCTACAAGACTACAGAGTTAACAAGAACAAGCAAG	AGATACAAGACCTTCCCTACAAGACTACAGAGTTAACAAGAACAAGCAAG	AGATACAAGACATTCCCTACAAGACTACAGAGTTAACAAGAACAAGCAAG	AGATACAAGACAATCCCTACAAGACTACAGAGTTAACAAGAACAAGCAAG	AGATACAAGACAATTCCTACAAGACTACAGAGTTAACAAGAACAAGCAAG	AGATACAAGACAATTCCTACAAGACTACAAAGTTAACAAGAACAAGCAAG	AGATACAAGACAATTCCTACAAGACTACAAAGCTAACAAGAACAAGCAAG	AGATACAAGACAAGTCCTACAAGACTACAAAGCTAACAAGAACAAGCAAG	AGATACAAGACAAGTCCTACAAAACTACAAAGCTAACAAGAACAAGCAAG	AGATACAAGACAAGTACTACAAAACTACAAAGCTAACAAGAACAAGCAAG	AGAAACAAGACAAGTACTACAAAACTACAAAGCTAACAAGAACAAGCAAG	AGAAACAAGACAAGAACTACAAAACTACAAAGCTAACAAGAACAAGCAAG	AGAAACAAGACAAGAATTACAAAACTACAAAGCTAACAAGAACAAGCAAG	AGAAACAAGACAAGAATTACAAAACTACAAAGCTAACAAGAACAAGCAAG	AGAAACAAGACAAGAATTACAAAACTACAAAGCTAACAAGAACAAGCAAG	AGAAACAAGACAAGAATTACAAAACTACAAAGCTAACAAGAACAAGCAAG	AGAAACAAGACAAGAATTACAAAACTACAAAGCTAACAAGAACAAGCAAG	AGAAACAAGACAAGAATTACAAAACTACAAAGCTAACAAGAACAAGCAAG	AGAAACAAGACAAGAATTACAAAACTACAAAGCTAACAAGAACAAGCAAG	AGAAACAAGACAAGAATTACAAAACTACAAAGCTAACAAGAACAAGCAAG	AGAAACAAGACAAGAATTACAAAACTACAAAGCTAACAAGAACAAGCAAG	AGAAACAAGACAAGAATTACAAAACTACAAAGCTAACAAGAACAAGCAAG	AGAAACAAGACAAGAATTACAAAACTACAAAGCTAACAAGAACAAGCAAG	AGAAACAAGACAAGAATTACAAAACTACAAAGCTAACAAGAACAAGCAAG	AGAAACAAGACAAGAATTACAAAACTACAAAGCTAACAAGAACAAGCAAG
17	ACCGGGTACCCGAGTCAACGAACATATCCAGTATTAAATGTGTAACATGA	ACCGGGTACCCGAGTCAACGAACATATCCAGTATTAAATGTGTAACAAGA	ACCGGGTACCCGAGTCAACGAACATATCCAGTATTAAAAGTGTAACAAGA	ACCGGGTACCCGAGTCAACGAACATATCCAGTATTAAAAGTGTTACAAGA	ACCGGGTACCCGAGTCAACGAAGATATCCAGTATTAAAAGTGTTACAAGA	ACCGGGTACCCGAGTCAACGAAGATATACAGTATTAAAAGTGTTACAAGA	ACCGGGTACCCGAGTCAACGAAGATATACAGTATTAAGAGTGTTACAAGA	ACAGGGTACCCGAGTCAACGAAGATATACAGTATTAAGAGTGTTACAAGA	AGAGGGTACCCGAGTCAACGAAGATATACAGTATTAAGAGTGTTACAAGA	AGAGGGTAACCGAGTCAACGAAGATATACAGTATTAAGAGTGTTACAAGA	AGAGGGTAACCGAGTCAACGAAGATATACAGAATTAAGAGTGTTACAAGA	AGAGGGTAACCGAGTAAACGAAGATATACAGAATTAAGAGTGTTACAAGA	AGAGGGTAACCGAGTAAACAAAGATATACAGAATTAAGAGTGTTACAAGA	AGAGGGTAACCGAGTATACAAAGATATACAGAATTAAGAGTGTTACAAGA	AGAGGGTAACCGAGTTTACAAAGATATACAGAATTAAGAGTGTTACAAGA	AGAGGGTAACCGAGTTTACAAAGATATACAGAACTAAGAGTGTTACAAGA	AGAGGGTAACCGAATTTACAAAGATATACAGAACTAAGAGTGTTACAAGA	AGAGGGTAACCGAAATTACAAAGATATACAGAACTAAGAGTGTTACAAGA	AGAGGGTAACCTAAATTACAAAGATATACAGAACTAAGAGTGTTACAAGA	AGAGGGTAAGCTAAATTACAAAGATATACAGAACTAAGAGTGTTACAAGA	AGAGGGTAAGCTAAATTACAAAGATATACACAACTAAGAGTGTTACAAGA	AGAGGGTAAGCTAAATTACAAAGATATATACAACTAAGAGTGTTACAAGA	AGAGGGTAAGCTAAATTACAAAGATATATACAAATAAGAGTGTTACAAGA	AGAGGGTAAGCTAAATTACAAAGATATATACAAATAAGAGTGTTACAAGA	AGAGGGTAAGCTAAATTACAAAGATATATACAAATAAGAGTGTTACAAGA	AGAGGGTAAGCTAAATTACAAAGATATATACAAATAAGAGTGTTACAAGA	AGAGGGTAAGCTAAATTACAAAGATATATACAAATAAGAGTGTTACAAGA	AGAGGGTAAGCTAAATTACAAAGATATATACAAATAAGAGTGTTACAAGA	AGAGGGTAAGCTAAATTACAAAGATATATACAAATAAGAGTGTTACAAGA	AGAGGGTAAGCTAAATTACAAAGATATATACAAATAAGAGTGTTACAAGA	AGAGGGTAAGCTAAATTACAAAGATATATACAAATAAGAGTGTTACAAGA	AGAGGGTAAGCTAAATTACAAAGATATATACAAATAAGAGTGTTACAAGA	AGAGGGTAAGCTAAATTACAAAGATATATACAAATAAGAGTGTTACAAGA	AGAGGGTAAGCTAAATTACAAAGATATATACAAATAAGAGTGTTACAAGA	AGAGGGTAAGCTAAATTACAAAGATATATACAAATAAGAGTGTTACAAGA	AGAGGGTAAGCTAAATTACAAAGATATATACAAATAAGAGTGTTACAAGA	AGAGGGTAAGCTAAATTACAAAGATATATACAAATAAGAGTGTTACAAGA	AGAGGGTAAGCTAAATTACAAAGATATATACAAATAAGAGTGTTACAAGA	AGAGGGTAAGCTAAATTACAAAGATATATACAAATAAGAGTGTTACAAGA	AGAGGGTAAGCTAAATTACAAAGATATATACAAATAAGAGTGTTACAAGA	AGAGGGTAAGCTAAATTACAAAGATATATACAAATAAGAGTGTTACAAGA
18	GTGATTACCGCGTGTCAACTAAGGGCGTTGTCCGCCCCGCCATATATAGC	GTGATTACCGCGTGTCAACTAAGAGCGTTGTCCGCCCCGCCATATATAGC	GTGATTACCGCGTGTCAACTAAGAGCATTGTCCGCCCCGCCATATATAGC	GTGATTACCGCGTGTCAACTAAGAGCATTGTCCGCCCCGCCATATAAAGC	GTCATTACCGCGTGTCAACTAAGAGCATTGTCCGCCCCGCCATATAAAGC	GTCATTACCGCGTATCAACTAAGAGCATTGTCCGCCCCGCCATATAAAGC	GTCATTACAGCGTATCAACTAAGAGCATTGTCCGCCCCGCCATATAAAGC	GTCATTACAGCGTATAAACTAAGAGCATTGTCCGCCCCGCCATATAAAGC	GTCATTACAGAGTATAAACTAAGAGCATTGTCCGCCCCGCCATATAAAGC	GTCATTACAAAGTATAAACTAAGAGCATTGTCCGCCCCGCCATATAAAGC	GTCATTACAAAGTATAAACTAAGAGCATTGTCCGCCCCGCTATATAAAGC	GTCATTACAAAGTATAAACTAAGAGCATTGTCCGCCCAGCTATATAAAGC	GTCATTACAAAGTATAAACTAAGAGCATTGTCCGCCCAGCTATATAAATC	GTCATTACAAAGTATAAACTAAGAGCATTGTCCGCCAAGCTATATAAATC	GTCATTACAAAGTATAAACTAAGAGCATTGTCCGACAAGCTATATAAATC	GTCATTACAAAGTATAAACTAAGAGCATTGTACGACAAGCTATATAAATC	GTCATTACAAAGTATAAACTAAGAGCATTGTAAGACAAGCTATATAAATC	GTCATTACAAAGTATAAACTAAGAGCATTTTAAGACAAGCTATATAAATC	GTCATTACAAAGTATATACTAAGAGCATTTTAAGACAAGCTATATAAATC	GTCATTACAAAGTATATACAAAGAGCATTTTAAGACAAGCTATATAAATC	GTCATTACAAAGTATATACAAAGATCATTTTAAGACAAGCTATATAAATC	GTCATTACAAAGTATATACAAAGATAATTTTAAGACAAGCTATATAAATC	GTCATTACAAAGTATATACAAAGATAATTTCAAGACAAGCTATATAAATC	GTCATTACAAAGTATATACAAAGATAATTACAAGACAAGCTATATAAATC	GTCATTACAAAGTATATACAAAGATAATTACAAGACAAGCTATATAAAAC	GTCCTTACAAAGTATATACAAAGATAATTACAAGACAAGCTATATAAAAC	GTACTTACAAAGTATATACAAAGATAATTACAAGACAAGCTATATAAAAC	GTACATACAAAGTATATACAAAGATAATTACAAGACAAGCTATATAAAAC	TTACATACAAAGTATATACAAAGATAATTACAAGACAAGCTATATAAAAC	TTACATACAAAGTATATACAAAGATAATTACAAGACAAGCTATATAAAAC	TTACATACAAAGTATATACAAAGATAATTACAAGACAAGCTATATAAAAC	TTACATACAAAGTATATACAAAGATAATTACAAGACAAGCTATATAAAAC	TTACATACAAAGTATATACAAAGATAATTACAAGACAAGCTATATAAAAC	TTACATACAAAGTATATACAAAGATAATTACAAGACAAGCTATATAAAAC	TTACATACAAAGTATATACAAAGATAATTACAAGACAAGCTATATAAAAC	TTACATACAAAGTATATACAAAGATAATTACAAGACAAGCTATATAAAAC	TTACATACAAAGTATATACAAAGATAATTACAAGACAAGCTATATAAAAC	TTACATACAAAGTATATACAAAGATAATTACAAGACAAGCTATATAAAAC	TTACATACAAAGTATATACAAAGATAATTACAAGACAAGCTATATAAAAC	TTACATACAAAGTATATACAAAGATAATTACAAGACAAGCTATATAAAAC	TTACATACAAAGTATATACAAAGATAATTACAAGACAAGCTATATAAAAC
19	TCAATATTCCTGTTGAACGAGTATAGACACGCGGCAGCCGGAGTTGGACA	TCAATATTCCTGTTGAACGAGTATAGACACGCAGCAGCCGGAGTTGGACA	TCAATATTCCTGTTGAACAAGTATAGACACGCAGCAGCCGGAGTTGGACA	TCAATATTCCTGTTGAACAAGTAAAGACACGCAGCAGCCGGAGTTGGACA	TCAATATTCCTGTTGAACAAGTAAAGACAAGCAGCAGCCGGAGTTGGACA	TCAATATTCCTGTTGAACAAGTAAAGACAAGCAGCAGACGGAGTTGGACA	TCAATATTCCTGTTTAACAAGTAAAGACAAGCAGCAGACGGAGTTGGACA	TCAATATTCCTATTTAACAAGTAAAGACAAGCAGCAGACGGAGTTGGACA	TCAATATTCCTATTTAACAAGAAAAGACAAGCAGCAGACGGAGTTGGACA	TCAAAATTCCTATTTAACAAGAAAAGACAAGCAGCAGACGGAGTTGGACA	TCAAAAGTCCTATTTAACAAGAAAAGACAAGCAGCAGACGGAGTTGGACA	TCAAAAGTCCTATTTAACAAGAAAAGACAAGCAGCAGACGGAGTTGAACA	TAAAAAGTCCTATTTAACAAGAAAAGACAAGCAGCAGACGGAGTTGAACA	TAAAAAGTCCTATTTAACAAGACAAGACAAGCAGCAGACGGAGTTGAACA	TAAAAAGTCCTATTTAACAAGACAAGACAAGCAGCAGACGAAGTTGAACA	TAAAAAGTCCTATTTAACAAGACAAGACAAGCAGCATACGAAGTTGAACA	TAAAAAGTCCTATATAACAAGACAAGACAAGCAGCATACGAAGTTGAACA	TAAAAAGACCTATATAACAAGACAAGACAAGCAGCATACGAAGTTGAACA	TACAAAGACCTATATAACAAGACAAGACAAGCAGCATACGAAGTTGAACA	TACAAAGAACTATATAACAAGACAAGACAAGCAGCATACGAAGTTGAACA	TACAAAGAACTATATAACAAGACAAGACAAGCAGAATACGAAGTTGAACA	TACAAAGAACTATATAACAAGACAAGACAAGAAGAATACGAAGTTGAACA	TACAAAGAACTATATAACAAGACAAGACAAGAAGAATACAAAGTTGAACA	TACAAAGAACTATATAACAAGACAAGACAAGAAGTATACAAAGTTGAACA	TACAAAGAACTATATAACAAGACAAGACAAGAAGTATATAAAGTTGAACA	TACAAAGAACTATATAACAAGACAAGACAAGAAGTATATAAAATTGAACA	TACAAAGAACTATATAACAAGACAAGACAAGAAGTATATAAAATTAAACA	TACAAAGAACTATATAACAAGACAAGACAAGAAGTATATAAAATTAAATA	TACAAAGAACTATATAACAAGACAAGACAAGAAGTATATAAAATTACATA	TACAAAGAACTATATAACAAGACAAGACAAGAATTATATAAAATTACATA	TACAAAGAACTATATAACAAGACAAGACAAGAATTACATAAAATTACATA	TACAAAGAACTATATAACAAGACAAGACAAGAATTACATAAAACTACATA	TACAAAGAACTATATAACAAGACAAGACAAGAATTACATAAAACTACAAA	TACAAAGAACTATATAACAAGACAAGACAAGAATTACATAAAACTACAAG	TACAAAGAACTACATAACAAGACAAGACAAGAATTACATAAAACTACAAG	TACAAAGAACTACATAACAAGACAAGACAAGAATTACATAAAACTACAAG	TACAAAGAACTACATAACAAGACAAGACAAGAATTACATAAAACTACAAG	TACAAAGAACTACATAACAAGACAAGACAAGAATTACATAAAACTACAAG	TACAAAGAACTACATAACAAGACAAGACAAGAATTACATAAAACTACAAG	TACAAAGAACTACATAACAAGACAAGACAAGAATTACATAAAACTACAAG	TACAAAGAACTACATAACAAGACAAGACAAGAATTACATAAAACTACAAG
20	TTCATTACCCCCGTCCAGGCGATGCCCAAATAATATTAGGCACCGCTAGA	TTCATTACCCCCGTCCAGGCGATACCCAAATAATATTAGGCACCGCTAGA	TTCATTACCCCCGTCCAGGCGATACCCAAATAATATTAGGCACCGCAAGA	GTCATTACCCCCGTCCAGGCGATACCCAAATAATATTAGGCACCGCAAGA	GTCATTACCCCCGTCCAGGCGATACACAAATAATATTAGGCACCGCAAGA	GTCATTACCCCCGTCCAGACGATACACAAATAATATTAGGCACCGCAAGA	GTCATTACCCCCGTCCAGAAGATACACAAATAATATTAGGCACCGCAAGA	GTCATTACCCCCGTCCAGAAGATACACAAATAATATAAGGCACCGCAAGA	GTCATTACCCCCGTCAAGAAGATACACAAATAATATAAGGCACCGCAAGA	GTCATTACCCCCGTCAAGAAGATATACAAATAATATAAGGCACCGCAAGA	GTCATTACCCCCGTCAAGAAGATATACAAATTATATAAGGCACCGCAAGA	GTCATTACCCCCGTCAAGAAGATATACAAATTATATAAGACACCGCAAGA	GTCATTACCCCCGTCAAGAAGATATACAAATTATATAAGACAACGCAAGA	GTCATTACCCCCGTCAAGAAGATATACAAATTATATAAGACAAAGCAAGA	GTCATTACCCCAGTCAAGAAGATATACAAATTATATAAGACAAAGCAAGA	GTCATTACCCAAGTCAAGAAGATATACAAATTATATAAGACAAAGCAAGA	GTCATTACACAAGTCAAGAAGATATACAAATTATATAAGACAAAGCAAGA	GTCCTTACACAAGTCAAGAAGATATACAAATTATATAAGACAAAGCAAGA	GTCCTTACACAAGTCAAGAAGATATATAAATTATATAAGACAAAGCAAGA	GTCCTTACACAAGACAAGAAGATATATAAATTATATAAGACAAAGCAAGA	GTCCTTACACAAGACAAGAAGATATATAAACTATATAAGACAAAGCAAGA	GTCCTTACACAAGACAAGAAGATATATAAACTATATAAGACTAAGCAAGA	GTCCTTACACAAGACAAGAAGATATATAAACTATATAAGACTAAACAAGA	GTCCTTACACAAGACAAGAAGATATATAAACTATATAAGACTACACAAGA	GTCCTTACACAAGACAAGAAGATATATAAACTATATAAAACTACACAAGA	GTACTTACACAAGACAAGAAGATATATAAACTATATAAAACTACACAAGA	GTACATACACAAGACAAGAAGATATATAAACTATATAAAACTACACAAGA	TTACATACACAAGACAAGAAGATATATAAACTATATAAAACTACACAAGA	TTACATATACAAGACAAGAAGATATATAAACTATATAAAACTACACAAGA	TTACATATACAAGACAAGAAGTTATATAAACTATATAAAACTACACAAGA	TTACATATACAAGACAAGAAGTTATATAAACTATATAAAACTACACAAGA	TTACATATACAAGACAAGAAGTTATATAAACTATATAAAACTACACAAGA	TTACATATACAAGACAAGAAGTTATATAAACTATATAAAACTACACAAGA	TTACATATACAAGACAAGAAGTTATATAAACTATATAAAACTACACAAGA	TTACATATACAAGACAAGAAGTTATATAAACTATATAAAACTACACAAGA	TTACATATACAAGACAAGAAGTTATATAAACTATATAAAACTACACAAGA	TTACATATACAAGACAAGAAGTTATATAAACTATATAAAACTACACAAGA	TTACATATACAAGACAAGAAGTTATATAAACTATATAAAACTACACAAGA	TTACATATACAAGACAAGAAGTTATATAAACTATATAAAACTACACAAGA	TTACATATACAAGACAAGAAGTTATATAAACTATATAAAACTACACAAGA	TTACATATACAAGACAAGAAGTTATATAAACTATATAAAACTACACAAGA
21	CTGCCCATCATGCACCAGGAAGGACAATCAGTAAAAGGTGTCTAGTCATT	CTGCCCATCAAGCACCAGGAAGGACAATCAGTAAAAGGTGTCTAGTCATT	CTGCCCATCAAGCACCAGGAATGACAATCAGTAAAAGGTGTCTAGTCATT	CTGCCCATCAAGCACCAGGAATGACAATCAGTAAAAGGTGTCTAGTCATG	CTGCCCATCAAGCACCAAGAATGACAATCAGTAAAAGGTGTCTAGTCATG	CAGCCCATCAAGCACCAAGAATGACAATCAGTAAAAGGTGTCTAGTCATG	CAGCCCATCAAGCAACAAGAATGACAATCAGTAAAAGGTGTCTAGTCATG	CAGCCCATCAAGCAACAAGAATGACAATCAGTAAAAGGTGTCAAGTCATG	CAGCCCATCAAGCAACAAGAATGACAATCAGTAAAAGGTGTCAAGTCAAG	CAGCCCATCAAGCAACAAGAATGACAATCAGTAAAAGGTGTCAAGACAAG	CAGCCCATCAAGCAACAAGAATGACAATCAGTAAAAAGTGTCAAGACAAG	CAGCCCATCAAGCAACAAGAATGACAATCAGTACAAAGTGTCAAGACAAG	CAGCCCATCAAGCAACAAGAATGACAATCACTACAAAGTGTCAAGACAAG	CAGCCCATCAAGAAACAAGAATGACAATCACTACAAAGTGTCAAGACAAG	CAGTCCATCAAGAAACAAGAATGACAATCACTACAAAGTGTCAAGACAAG	AAGTCCATCAAGAAACAAGAATGACAATCACTACAAAGTGTCAAGACAAG	AAGTCCATCAAGAAACAAGAATTACAATCACTACAAAGTGTCAAGACAAG	AAGTCCATCAAGAAACAAGAATTACAATTACTACAAAGTGTCAAGACAAG	AAGTCCATCAAGAAACAAGAATTACAATTACTACAAAGAGTCAAGACAAG	AAGTCCATCAAGAAACAAGATTTACAATTACTACAAAGAGTCAAGACAAG	AAGTCCATCAAGAAACAAGATTTACAATTACTACAAAGAGACAAGACAAG	AAGTCCATCAAGAAACAAGATTTACAATTACTACAAAGATACAAGACAAG	AAGTCCCTCAAGAAACAAGATTTACAATTACTACAAAGATACAAGACAAG	AAGTCCCACAAGAAACAAGATTTACAATTACTACAAAGATACAAGACAAG	AAGTCCTACAAGAAACAAGATTTACAATTACTACAAAGATACAAGACAAG	AAGTCCTACAAGAAACAAGATTTACAATTACTACAAAGATACAAGACAAG	AAGTCCTACAAGAAACAAGATTTACAATTACTACAAAGATACAAGACAAG	AAGTCCTACAAGAAACAAGATTTACAATTACTACAAAGATACAAGACAAG	AAGTCCTACAAGAAACAAGATTTACAATTACTACAAAGATACAAGACAAG	AAGTCCTACAAGAAACAAGATTTACAATTACTACAAAGATACAAGACAAG	AAGTCCTACAAGAAACAAGATTTACAATTACTACAAAGATACAAGACAAG	AAGTCCTACAAGAAACAAGATTTACAATTACTACAAAGATACAAGACAAG	AAGTCCTACAAGAAACAAGATTTACAATTACTACAAAGATACAAGACAAG	AAGTCCTACAAGAAACAAGATTTACAATTACTACAAAGATACAAGACAAG	AAGTCCTACAAGAAACAAGATTTACAATTACTACAAAGATACAAGACAAG	AAGTCCTACAAGAAACAAGATTTACAATTACTACAAAGATACAAGACAAG	AAGTCCTACAAGAAACAAGATTTACAATTACTACAAAGATACAAGACAAG	AAGTCCTACAAGAAACAAGATTTACAATTACTACAAAGATACAAGACAAG	AAGTCCTACAAGAAACAAGATTTACAATTACTACAAAGATACAAGACAAG	AAGTCCTACAAGAAACAAGATTTACAATTACTACAAAGATACAAGACAAG	AAGTCCTACAAGAAACAAGATTTACAATTACTACAAAGATACAAGACAAG
22	ATACAACAGCAGTCTTCGTTCACATTCAAATATGCATCCGTCCCTAGATG	ATACAACAGCAGTCTTCGTTCACATTCAAATATACATCCGTCCCTAGATG	ATACAACAGCAGTCTTCGTTCACATACAAATATACATCCGTCCCTAGATG	ATACAACAGCAGTCTTCGTTTACATACAAATATACATCCGTCCCTAGATG	ATACAACAGCAGTCTTCGTTTACATACAAATATACATCCGTCCCAAGATG	ATACAAGAGCAGTCTTCGTTTACATACAAATATACATCCGTCCCAAGATG	ATACAAGAGAAGTCTTCGTTTACATACAAATATACATCCGTCCCAAGATG	ATACAAGAGAAGTCTACGTTTACATACAAATATACATCCGTCCCAAGATG	ATACAAGAGAAGTCTACGATTACATACAAATATACATCCGTCCCAAGATG	ATACAAGAGAAGTCTACGATTACATACAAATATACAACCGTCCCAAGATG	ATACAAGAGAAGTCTACGATTACATACAAATATACAACCGTCACAAGATG	ATACAAGAGAAGTCTACGATTACATACAAATATACAACCGTTACAAGATG	ATACAAGAGAAGTCTACGATTACATACAAATATACAACAGTTACAAGATG	ATACAAGAAAAGTCTACGATTACATACAAATATACAACAGTTACAAGATG	AGACAAGAAAAGTCTACGATTACATACAAATATACAACAGTTACAAGATG	AGACAAGAAAAGTCTACGATTACATACAAATATACAAGAGTTACAAGATG	AGACAAGAAAAGTCTACGATTACATACAAATATACAAGAGTTACAAGAAG	AGACAAGAAAAGTCTACGATTACATACAAAGATACAAGAGTTACAAGAAG	AGACAAGAAAAGACTACGATTACATACAAAGATACAAGAGTTACAAGAAG	AGACAAGACAAGACTACGATTACATACAAAGATACAAGAGTTACAAGAAG	AGACAATACAAGACTACGATTACATACAAAGATACAAGAGTTACAAGAAG	AGAAAATACAAGACTACGATTACATACAAAGATACAAGAGTTACAAGAAG	AGAAAATACAAGACTACTATTACATACAAAGATACAAGAGTTACAAGAAG	AGAAAATACAAGACTACTATTACATACAAAGATACAAGAATTACAAGAAG	AGAAAATACAAGACTACTATTACATACAAAGATACAAGAACTACAAGAAG	AGAAAATACAAGACTACTATTACATACAAAGATACAAGAACTACAACAAG	AGAAAATACAAGACTACTATTACATACAAAGATACAAGAACTACTACAAG	AGAAAATACAAGACTACTATTACATACAAAGACACAAGAACTACTACAAG	AGAAAATACAAGACTACTACTACATACAAAGACACAAGAACTACTACAAG	AGAATATACAAGACTACTACTACATACAAAGACACAAGAACTACTACAAG	AGATTATACAAGACTACTACTACATACAAAGACACAAGAACTACTACAAG	AGATTATACAAGACTACTACTATATACAAAGACACAAGAACTACTACAAG	AGATTATACAAGACTACTACTATATACAAAGACACAAGAACTACTACAAG	AGATTATACAAGACTACTACTATATACAAAGACACAAGAACTACTACAAG	AGATTATACAAGACTACTACTATATACAAAGACACAAGAACTACTACAAG	AGATTATACAAGACTACTACTATATACAAAGACACAAGAACTACTACAAG	AGATTATACAAGACTACTACTATATACAAAGACACAAGAACTACTACAAG	AGATTATACAAGACTACTACTATATACAAAGACACAAGAACTACTACAAG	AGATTATACAAGACTACTACTATATACAAAGACACAAGAACTACTACAAG	AGATTATACAAGACTACTACTATATACAAAGACACAAGAACTACTACAAG	AGATTATACAAGACTACTACTATATACAAAGACACAAGAACTACTACAAG
23	ATATATTCGATTCAATTGCATCAATCGCATGGCCACGTATCATCCGCCGT	ATATATTCGATTCAATTGCATCAATCGCAAGGCCACGTATCATCCGCCGT	ATATATTCGATTCAATTGCATCAATCGCAAGGCCACGTATCATCCGCAGT	AGATATTCGATTCAATTGCATCAATCGCAAGGCCACGTATCATCCGCAGT	AGATATTCGATTCAATTGCATCAATCGCAAGACCACGTATCATCCGCAGT	AGATATTCGATTCAATTGCATCAATCGCAAGACTACGTATCATCCGCAGT	AGATATTCGATTCAATTGCATCAATCGCAAGACTACGTATCATCAGCAGT	AGATATTCGATTCAATTGCATCAATCGCAAGACTACGTATCATGAGCAGT	AGATATACGATTCAATTGCATCAATCGCAAGACTACGTATCATGAGCAGT	AGATATACTATTCAATTGCATCAATCGCAAGACTACGTATCATGAGCAGT	AGATATACTATTCAATTACATCAATCGCAAGACTACGTATCATGAGCAGT	AGATATACTATTCAATTACATAAATCGCAAGACTACGTATCATGAGCAGT	AGATATACTATACAATTACATAAATCGCAAGACTACGTATCATGAGCAGT	AGATATACTATACAATTACATAAATAGCAAGACTACGTATCATGAGCAGT	AGATATACTATACAATTACATAAATAACAAGACTACGTATCATGAGCAGT	AGATATACTATACAATTATATAAATAACAAGACTACGTATCATGAGCAGT	AGATATACTATACAATTATATAAATAACAAGACTACGAATCATGAGCAGT	AGATATACTATACAATTATATAAATAACAAGACTACGAATAATGAGCAGT	AGATATACTATACAATTATATAAATTACAAGACTACGAATAATGAGCAGT	AGATATACTATACAATTATATAAATTACAAGACTACGAATAATGAACAGT	AGATATACTATACAACTATATAAATTACAAGACTACGAATAATGAACAGT	AGATATACTATACAACTATATAAACTACAAGACTACGAATAATGAACAGT	AGATATACTATAAAACTATATAAACTACAAGACTACGAATAATGAACAGT	AGATATACTACAAAACTATATAAACTACAAGACTACGAATAATGAACAGT	AGAAATACTACAAAACTATATAAACTACAAGACTACGAATAATGAACAGT	AGAAATACTACGAAACTATATAAACTACAAGACTACGAATAATGAACAGT	AGAAGTACTACGAAACTATATAAACTACAAGACTACGAATAATGAACAGT	AGAAGTACTACGAAACTATATAAACTACAAGACTACGAATAATGAACAGT	AGAAGTACTACGAAACTATATAAACTACAAGACTACGAATAATGAACAGT	AGAAGTACTACGAAACTATATAAACTACAAGACTACGAATAATGAACAGT	AGAAGTACTACGAAACTATATAAACTACAAGACTACGAATAATGAACAGT	AGAAGTACTACGAAACTATATAAACTACAAGACTACGAATAATGAACAGT	AGAAGTACTACGAAACTATATAAACTACAAGACTACGAATAATGAACAGT	AGAAGTACTACGAAACTATATAAACTACAAGACTACGAATAATGAACAGT	AGAAGTACTACGAAACTATATAAACTACAAGACTACGAATAATGAACAGT	AGAAGTACTACGAAACTATATAAACTACAAGACTACGAATAATGAACAGT	AGAAGTACTACGAAACTATATAAACTACAAGACTACGAATAATGAACAGT	AGAAGTACTACGAAACTATATAAACTACAAGACTACGAATAATGAACAGT	AGAAGTACTACGAAACTATATAAACTACAAGACTACGAATAATGAACAGT	AGAAGTACTACGAAACTATATAAACTACAAGACTACGAATAATGAACAGT	AGAAGTACTACGAAACTATATAAACTACAAGACTACGAATAATGAACAGT
24	TGCTCACTAGTACCCGGAGATTGCAAACAGTCCGTGAAACCTTGAATGTG	TGCTCACTAGTACCCGGAGATTGCAAACAGTCCGTGAAACCTTGAATATG	TGCTCACTAGTACCCGGAGAATGCAAACAGTCCGTGAAACCTTGAATATG	TACTCACTAGTACCCGGAGAATGCAAACAGTCCGTGAAACCTTGAATATG	TACACACTAGTACCCGGAGAATGCAAACAGTCCGTGAAACCTTGAATATG	TACACACTAGTACACGGAGAATGCAAACAGTCCGTGAAACCTTGAATATG	TACACACTAGTACACAGAGAATGCAAACAGTCCGTGAAACCTTGAATATG	TACACACTAGTACACAGACAATGCAAACAGTCCGTGAAACCTTGAATATG	TACACACTAGTACACAGACAATGAAAACAGTCCGTGAAACCTTGAATATG	TACACACTAGTACACAGACAATGAAAAAAGTCCGTGAAACCTTGAATATG	TACACACTAGTACACAGACAATGAAAAAAGTCCGTGAAACCTTAAATATG	TACACACTACTACACAGACAATGAAAAAAGTCCGTGAAACCTTAAATATG	TACACACTACTACAAAGACAATGAAAAAAGTCCGTGAAACCTTAAATATG	TACACAGTACTACAAAGACAATGAAAAAAGTCCGTGAAACCTTAAATATG	TACAAAGTACTACAAAGACAATGAAAAAAGTCCGTGAAACCTTAAATATG	TACAAAGTACTACAAAGACAATGAAAAAAGTCCGTGAAACGTTAAATATG	TACAAAGTACTACAAAGACAATGAAAAAAGTCCGTGAAAAGTTAAATATG	TACAAAGTACTACAAAGACAATGAAAAAAGTCCGTGAAGAGTTAAATATG	TACAAAGTACTACAAAGACAATGAAAAAAGTCCGTGAAGAATTAAATATG	TACAAAGTACTACAAAGACAATGAAAAAAGTCGGTGAAGAATTAAATATG	TACAAAGTACTACAAAGACAATGAAAAAAGTCGCTGAAGAATTAAATATG	TACAAAGTACTACAAAGACAATGAAAAAAGTCGCTAAAGAATTAAATATG	TACAAAGTACTACAAAGACAATGACAAAAGTCGCTAAAGAATTAAATATG	TACAAAGTACTACAAAGACAATGACACAAGTCGCTAAAGAATTAAATATG	TACAAAGTACTACAAAGACAATGACACAAGACGCTAAAGAATTAAATATG	TACAAAGTACTACAAAGACAATGACACAAGACGCTAAAGAATCAAATATG	TACAAAGTACTACAAAGACAATGACACAAGAAGCTAAAGAATCAAATATG	TACAAAGTACTACAAAGACAATGACACAACAAGCTAAAGAATCAAATATG	TACAAAGTACTACAAAGACAATGACACAACAAGCTAAAGAATCAACTATG	TACAAAGTCCTACAAAGACAATGACACAACAAGCTAAAGAATCAACTATG	TACAAAGTCCTACAAATACAATGACACAACAAGCTAAAGAATCAACTATG	TACAAAGTCCTACAAATAAAATGACACAACAAGCTAAAGAATCAACTATG	TACAAAGTCCTACAAATAAAATGACACTACAAGCTAAAGAATCAACTATG	TACAAAGTCCTACAAATAAAATGAGACTACAAGCTAAAGAATCAACTATG	TACAAAGTCCTACAAATAAAATGAGACTACAAGCTAAAGAATCAACTATG	TACAAAGTCCTACAAATAAAATGAGACTACAAGCTAAAGAATCAACTATG	TACAAAGTCCTACAAATAAAATGAGACTACAAGCTAAAGAATCAACTATG	TACAAAGTCCTACAAATAAAATGAGACTACAAGCTAAAGAATCAACTATG	TACAAAGTCCTACAAATAAAATGAGACTACAAGCTAAAGAATCAACTATG	TACAAAGTCCTACAAATAAAATGAGACTACAAGCTAAAGAATCAACTATG	TACAAAGTCCTACAAATAAAATGAGACTACAAGCTAAAGAATCAACTATG
25	ATGTACCTATGGCCTGAAACTGCTGCGTCCCCCCCAACGACGTAAAGTTT	ATGTACCTATGGCCTTAAACTGCTGCGTCCCCCCCAACGACGTAAAGTTT	ATATACCTATGGCCTTAAACTGCTGCGTCCCCCCCAACGACGTAAAGTTT	ATATACCTATGGCCTTAAACTGCTGCGTCCCCCCCAACGACGTAAAGATT	ATATACCTATGGCCTTAAACTGCTGCGTCCCCCCCAACGACGTCAAGATT	ATATACCTATGGCCTTAAACTGCTGCGTCCCCCCCAACGAAGTCAAGATT	ATATACCTATGGCATTAAACTGCTGCGTCCCCCCCAACGAAGTCAAGATT	ATATACCTATGACATTAAACTGCTGCGTCCCCCCCAACGAAGTCAAGATT	AGATACCTATGACATTAAACTGCTGCGTCCCCCCCAACGAAGTCAAGATT	AGATACCTATGACATTAAACAGCTGCGTCCCCCCCAACGAAGTCAAGATT	AGATACATATGACATTAAACAGCTGCGTCCCCCCCAACGAAGTCAAGATT	AGATACAAATGACATTAAACAGCTGCGTCCCCCCCAACGAAGTCAAGATT	AGATATAAATGACATTAAACAGCTGCGTCCCCCCCAACGAAGTCAAGATT	AGATATAAATGACAGTAAACAGCTGCGTCCCCCCCAACGAAGTCAAGATT	AGATATAAATGACAGTAAACAGCTGCGTCCCCCACAACGAAGTCAAGATT	AGATATAAATGACAGTAAACAGCTGCGTCCCCCACAACGAAGTCAAGATG	AGATATAAATGACAGTAAACAGCTGCGTCCCCCACAACGAAGACAAGATG	AGATATAAATGACAGTAAACAGCTGCGTCCCCCACTACGAAGACAAGATG	AGATATAAATGACAGTAAACAGCTGCGTCCCCCACTACAAAGACAAGATG	AGATATAAATGACAGCAAACAGCTGCGTCCCCCACTACAAAGACAAGATG	AGATATAAATGACAGCAAACAGCTGCGTCCCCAACTACAAAGACAAGATG	AGATATAAATGACAGCAAATAGCTGCGTCCCCAACTACAAAGACAAGATG	AGATATAAATGACAGCAAATAGCTGCGTCCGCAACTACAAAGACAAGATG	AGATATAAATGACAGCAAATAGCTGCATCCGCAACTACAAAGACAAGATG	AGATATAAATGACAGCAAGTAGCTGCATCCGCAACTACAAAGACAAGATG	AGATATAAATGACAGCAAGTAGCTACATCCGCAACTACAAAGACAAGATG	AGATATAAATGACAGCAAGTAGCTACATACGCAACTACAAAGACAAGATG	AGATATAAATGACAGCAAGTAGCTACATACGAAACTACAAAGACAAGATG	AGATATAAATGACAGCAAGAAGCTACATACGAAACTACAAAGACAAGATG	AGATATAAATGACAGCAAGAAGCTACATACAAAACTACAAAGACAAGATG	AGATATAAATGACAGCAAGAAGCTACATACAAGACTACAAAGACAAGATG	AGATATAAATGACAGCAAGAAACTACATACAAGACTACAAAGACAAGATG	AGATATAAATGACAGCAAGAAATTACATACAAGACTACAAAGACAAGATG	AGATATAAATGACAGCAAGTAATTACATACAAGACTACAAAGACAAGATG	AGATATAAATGACAGCAAGTAATTACATACAAGACTACAAAGACAAGATG	AGATATAAATGACAGCAAGTAATTACATACAAGACTACAAAGACAAGATG	AGATATAAATGACAGCAAGTAATTACATACAAGACTACAAAGACAAGATG	AGATATAAATGACAGCAAGTAATTACATACAAGACTACAAAGACAAGATG	AGATATAAATGACAGCAAGTAATTACATACAAGACTACAAAGACAAGATG	AGATATAAATGACAGCAAGTAATTACATACAAGACTACAAAGACAAGATG	AGATATAAATGACAGCAAGTAATTACATACAAGACTACAAAGACAAGATG
26	GTAGTACTAGAATACTAGTTAAACCGTGATCCTGGTGGATCACACCCACA	GTAGTACTAGAATACTATTTAAACCGTGATCCTGGTGGATCACACCCACA	GTACTACTAGAATACTATTTAAACCGTGATCCTGGTGGATCACACCCACA	GTACTACTAGAATACTATTTAAACCGTGATCCTGGTGGATCACACCTACA	GTACTACAAGAATACTATTTAAACCGTGATCCTGGTGGATCACACCTACA	GTCCTACAAGAATACTATTTAAACCGTGATCCTGGTGGATCACACCTACA	GTCCTACAAGAAAACTATTTAAACCGTGATCCTGGTGGATCACACCTACA	GTCCTACAAGAAAACTATTTAAACCGTGATCCTGGTGGATAACACCTACA	GTCCTACAAGAAAACTATTTAAACCGTGATCCTGGTGGATAACAACTACA	GTCCTACAAGAAAACTATTTAAACCGTGATCCTGGTTGATAACAACTACA	GTCCTACAAGAAAACTATTTAAACCGTGATCCAGGTTGATAACAACTACA	GTCCTACAAGAAAACTATTTAAACCGTGATCCAGGTTGATAAGAACTACA	GTCCTACAAGAAAACTATTTAAACAGTGATCCAGGTTGATAAGAACTACA	GTCCTACAAGAAAACTATTTAAACAGTGATCCAAGTTGATAAGAACTACA	GTCCTACAAGAAAACTATTTAAACAGTGATTCAAGTTGATAAGAACTACA	GTCCTACAAGAAAACTATTTAAACAGTGATTCAAGTTGACAAGAACTACA	GTCCTACAAGAAAACTATTTAAACAGTGATTCAAGTTTACAAGAACTACA	GTCCTACAAGAAAACTATTTAAACAGTGATTCAAGATTACAAGAACTACA	GTCCTACAAGAAAACTATTTAAACAGAGATTCAAGATTACAAGAACTACA	GTCCTACAAAAAAACTATTTAAACAGAGATTCAAGATTACAAGAACTACA	GTCCTACAAAAAAACTATTTAAACAAAGATTCAAGATTACAAGAACTACA	GTCCTACAAAAAAACTATTTAAACTAAGATTCAAGATTACAAGAACTACA	GTCCTACAAAAAAACTATTTAAACTAAGAATCAAGATTACAAGAACTACA	GTCCTACAAAAAAACTATTTAAACTAAGAATCAAGATTACAAGAACTACA	GTCCTACAAAAAAACTATTTAAACTAAGAATCAAGATTACAAGAACTACA	GTCCTACAAAAAAACTATTTAAACTAAGAATCAAGATTACAAGAACTACA	GTCCTACAAAAAAACTATTTAAACTAAGAATCAAGATTACAAGAACTACA	GTCCTACAAAAAAACTATTTAAACTAAGAATCAAGATTACAAGAACTACA	GTCCTACAAAAAAACTATTTAAACTAAGAATCAAGATTACAAGAACTACA	GTCCTACAAAAAAACTATTTAAACTAAGAATCAAGATTACAAGAACTACA	GTCCTACAAAAAAACTATTTAAACTAAGAATCAAGATTACAAGAACTACA	GTCCTACAAAAAAACTATTTAAACTAAGAATCAAGATTACAAGAACTACA	GTCCTACAAAAAAACTATTTAAACTAAGAATCAAGATTACAAGAACTACA	GTCCTACAAAAAAACTATTTAAACTAAGAATCAAGATTACAAGAACTACA	GTCCTACAAAAAAACTATTTAAACTAAGAATCAAGATTACAAGAACTACA	GTCCTACAAAAAAACTATTTAAACTAAGAATCAAGATTACAAGAACTACA	GTCCTACAAAAAAACTATTTAAACTAAGAATCAAGATTACAAGAACTACA	GTCCTACAAAAAAACTATTTAAACTAAGAATCAAGATTACAAGAACTACA	GTCCTACAAAAAAACTATTTAAACTAAGAATCAAGATTACAAGAACTACA	GTCCTACAAAAAAACTATTTAAACTAAGAATCAAGATTACAAGAACTACA	GTCCTACAAAAAAACTATTTAAACTAAGAATCAAGATTACAAGAACTACA
27	GAGTACGCCTGGTTTGGTGTGTTTGTCCCCGGAAGCTCATTTCGCACTGT	GAGTACGCCTGGTTTGGTGTGTTTGTCCCCGGAAGCTCATTTCGCACAGT	GAGTACGCCTGGTTTGGTGTGTTTGTCCCCGGAAGATCATTTCGCACAGT	GAGTACGACTGGTTTGGTGTGTTTGTCCCCGGAAGATCATTTCGCACAGT	GAGTACGACTGGTTTAGTGTGTTTGTCCCCGGAAGATCATTTCGCACAGT	GAGTACGACTGGTTAAGTGTGTTTGTCCCCGGAAGATCATTTCGCACAGT	GAGTACGACTGATTAAGTGTGTTTGTCCCCGGAAGATCATTTCGCACAGT	GAGTACGACTGATTAAGTGTGTTTGTCCACGGAAGATCATTTCGCACAGT	GAGTACGACTGATTAAGTGTGTTTGTCCACGCAAGATCATTTCGCACAGT	GAGTACGAATGATTAAGTGTGTTTGTCCACGCAAGATCATTTCGCACAGT	GAGTACGAATGATTAAGTGTGTTTGTCCACGCAAGATTATTTCGCACAGT	GAGTACGAATGATTAAGTGTGTTTGTCCACGCAAGATTATTTCGAACAGT	GAGTACGAATGATTAAGTGTGTTTGTCCACGCAAGATTATTACGAACAGT	GAGTACGAATGATTAAGTGTGTTTGTCCACGCAAGATTACTACGAACAGT	GAGTACGAATGATTAAGTGTGTTTGTCCACGCAAGATTACTACAAACAGT	GAGTACGAATGATTAAGTGTGTTTGTCCACGCAAGATTACTACAAAGAGT	GAGTACGAATGATTAAGTGTGTTTGTCCACGCAAGATTACTACAAAGATT	GAGTACAAATGATTAAGTGTGTTTGTCCACGCAAGATTACTACAAAGATT	GAGTACAAATGACTAAGTGTGTTTGTCCACGCAAGATTACTACAAAGATT	AAGTACAAATGACTAAGTGTGTTTGTCCACGCAAGATTACTACAAAGATT	AAGCACAAATGACTAAGTGTGTTTGTCCACGCAAGATTACTACAAAGATT	AAGCACAAATGACTAAGTGTGTTTGTCCACGCAAGATTACTACAAAGATA	AAGCACAAATGACTAAGTGTGTTTATCCACGCAAGATTACTACAAAGATA	AAGCACAAATGACTAAGTGTGTTCATCCACGCAAGATTACTACAAAGATA	AAGCACAAATGACTAAGTGTGTACATCCACGCAAGATTACTACAAAGATA	AAGCACAGATGACTAAGTGTGTACATCCACGCAAGATTACTACAAAGATA	AAGCACAGATGACTAAGAGTGTACATCCACGCAAGATTACTACAAAGATA	AAGCACAGATGACTAAGACTGTACATCCACGCAAGATTACTACAAAGATA	AAGCACAGATGACTAAGACTGTACATCCACGCAAGATTACTACAAAGATA	AAGCACAGATGACTAAGACTGTACATCCACGCAAGATTACTACAAAGATA	AAGCACAGATGACTAAGACTGTACATCCACGCAAGATTACTACAAAGATA	AAGCACAGATGACTAAGACTGTACATCCACGCAAGATTACTACAAAGATA	AAGCACAGATGACTAAGACTGTACATCCACGCAAGATTACTACAAAGATA	AAGCACAGATGACTAAGACTGTACATCCACGCAAGATTACTACAAAGATA	AAGCACAGATGACTAAGACTGTACATCCACGCAAGATTACTACAAAGATA	AAGCACAGATGACTAAGACTGTACATCCACGCAAGATTACTACAAAGATA	AAGCACAGATGACTAAGACTGTACATCCACGCAAGATTACTACAAAGATA	AAGCACAGATGACTAAGACTGTACATCCACGCAAGATTACTACAAAGATA	AAGCACAGATGACTAAGACTGTACATCCACGCAAGATTACTACAAAGATA	AAGCACAGATGACTAAGACTGTACATCCACGCAAGATTACTACAAAGATA	AAGCACAGATGACTAAGACTGTACATCCACGCAAGATTACTACAAAGATA
28	TATTTCACGGGAGCCCGCCACGCCTTCACAAGGAGAAGTACTTAGACTCC	TATTTCACGAGAGCCCGCCACGCCTTCACAAGGAGAAGTACTTAGACTCC	TATTTCACGAGAGCCCGCCACGCCTTCACAAGGAGAAGTACTTAGACTAC	TATTTCACGAGAGCCCGCCACGCCTTCACAAGAAGAAGTACTTAGACTAC	TATTTCACGAGAGCCCGCCACGCCTTCACAAGAAGAACTACTTAGACTAC	TATTTAACGAGAGCCCGCCACGCCTTCACAAGAAGAACTACTTAGACTAC	TATTTAACAAGAGCCCGCCACGCCTTCACAAGAAGAACTACTTAGACTAC	TATTTAACAAGAGCCCGCCAAGCCTTCACAAGAAGAACTACTTAGACTAC	TATTTAACAAGAGCCCGCCAAGACTTCACAAGAAGAACTACTTAGACTAC	TATTTAACAAGAGCCCGCCAAGACTACACAAGAAGAACTACTTAGACTAC	TATTTAACAAGAGCCCGCCAAGATTACACAAGAAGAACTACTTAGACTAC	TATTTAACAAAAGCCCGCCAAGATTACACAAGAAGAACTACTTAGACTAC	TATTTAACAAAAGCCCGACAAGATTACACAAGAAGAACTACTTAGACTAC	TATTTAACAAAAGCCCGACAAGATTATACAAGAAGAACTACTTAGACTAC	TATTTAACAAAAGCCCGACAAGATTATACAACAAGAACTACTTAGACTAC	TATTTAACAAAAGCCCGACAAGATTATATAACAAGAACTACTTAGACTAC	TATTTAACAAAAGCCCGACAAGATTATATAACAAGAACTACATAGACTAC	TATTTAACAAAAGCCCGACAAGATTATATAACAAGAACTACAAAGACTAC	TATTTAACAAAAGCCCTACAAGATTATATAACAAGAACTACAAAGACTAC	TATTTAACAAAAGCCATACAAGATTATATAACAAGAACTACAAAGACTAC	TATTTAACTAAAGCCATACAAGATTATATAACAAGAACTACAAAGACTAC	TATATAACTAAAGCCATACAAGATTATATAACAAGAACTACAAAGACTAC	TATATAACTAAAGCCATACAAGATTATATAACAAGAACTACAAAGACAAC	TATATAACTAAAGCCATACAAGATTATATAACAAGAACTACAAAGACAAG	TATATAACTAAAGCCATACAAGATTATATAACAAGAACTACAAAGACAAG	TATATAACTAAAGCCATACAAGATTATATAACAAGAACTACAAAGACAAG	TATATAACTAAAGCCATACAAGATTATATAACAAGAACTACAAAGACAAG	TATATAACTAAAGCCATACAAGATTATATAACAAGAACTACAAAGACAAG	TATATAACTAAAGCCATACAAGATTATATAACAAGAACTACAAAGACAAG	TATATAACTAAAGCCATACAAGATTATATAACAAGAACTACAAAGACAAG	TATATAACTAAAGCCATACAAGATTATATAACAAGAACTACAAAGACAAG	TATATAACTAAAGCCATACAAGATTATATAACAAGAACTACAAAGACAAG	TATATAACTAAAGCCATACAAGATTATATAACAAGAACTACAAAGACAAG	TATATAACTAAAGCCATACAAGATTATATAACAAGAACTACAAAGACAAG	TATATAACTAAAGCCATACAAGATTATATAACAAGAACTACAAAGACAAG	TATATAACTAAAGCCATACAAGATTATATAACAAGAACTACAAAGACAAG	TATATAACTAAAGCCATACAAGATTATATAACAAGAACTACAAAGACAAG	TATATAACTAAAGCCATACAAGATTATATAACAAGAACTACAAAGACAAG	TATATAACTAAAGCCATACAAGATTATATAACAAGAACTACAAAGACAAG	TATATAACTAAAGCCATACAAGATTATATAACAAGAACTACAAAGACAAG	TATATAACTAAAGCCATACAAGATTATATAACAAGAACTACAAAGACAAG
29	ATATGCATGGTTGTGTGTGTCGAGCTGGCCATAGTCTCGCATCGAAGCAC	ATATGCAAGGTTGTGTGTGTCGAGCTGGCCATAGTCTCGCATCGAAGCAC	ATATGCAAGGTTGTGTGTGTCGAGCTGGCCATAGTCTCGCATCGAAGAAC	ATATGCAAGGTTGTGTGAGTCGAGCTGGCCATAGTCTCGCATCGAAGAAC	ATATGCAAGGTTGTGTGAGTCGAGCTAGCCATAGTCTCGCATCGAAGAAC	ATATACAAGGTTGTGTGAGTCGAGCTAGCCATAGTCTCGCATCGAAGAAC	ATATACAAGATTGTGTGAGTCGAGCTAGCCATAGTCTCGCATCGAAGAAC	AGATACAAGATTGTGTGAGTCGAGCTAGCCATAGTCTCGCATCGAAGAAC	AGATACAAGATTGTGTGAGTCGAGCTAGACATAGTCTCGCATCGAAGAAC	AGATACAAGATTGTGTGAGTCGAGCAAGACATAGTCTCGCATCGAAGAAC	AGATACAAGATTGTGTGAGTCGAGCAAGACATAGTCTAGCATCGAAGAAC	AGATACAAGATTGTGTGAGTCGAGCAAGACAAAGTCTAGCATCGAAGAAC	AGATACAAGATTGTGTGAGTCGAGCAAGACAAAGACTAGCATCGAAGAAC	AGATACAAGATTGTGTAAGTCGAGCAAGACAAAGACTAGCATCGAAGAAC	AGATACAAGATTGTGTAAGTCAAGCAAGACAAAGACTAGCATCGAAGAAC	AGATACAAGATTGTGCAAGTCAAGCAAGACAAAGACTAGCATCGAAGAAC	AGATACAAGATTGTGCAAGACAAGCAAGACAAAGACTAGCATCGAAGAAC	AGATACAAGATTGTACAAGACAAGCAAGACAAAGACTAGCATCGAAGAAC	AGATACAAGATTATACAAGACAAGCAAGACAAAGACTAGCATCGAAGAAC	AGATACAAGATTATACAAGACAAGCAAGACAAAGACTAGCATCGAAGAAG	AGATACAAGATTATACAAGACAAGCAAGACAAAGACTAGCATCGAAGATG	AGATACAAGATTATACAAGACAAGCAAGACAAAGACAAGCATCGAAGATG	AGATACAAGATTATACAAGACAAGCAAGACAAAGACAAGAATCGAAGATG	AGAAACAAGATTATACAAGACAAGCAAGACAAAGACAAGAATCGAAGATG	AGAAACAAGATTATACAAGACAAGCAAGACAAAGACAAGAATCAAAGATG	AGAAACAAGATTATACAAGACAAGCAAGACAAAGACAAGAAACAAAGATG	AGAAACAAGATTATACAAGACAAGCAATACAAAGACAAGAAACAAAGATG	AGAAACAAGATTATACAAGACAAGCACTACAAAGACAAGAAACAAAGATG	AGAAACAAGATTATACAAGACAAGTACTACAAAGACAAGAAACAAAGATG	AGAAACAAGATTATACAAGAAAAGTACTACAAAGACAAGAAACAAAGATG	AGAATCAAGATTATACAAGAAAAGTACTACAAAGACAAGAAACAAAGATG	AGAATCAAGATTATACAAGAAAATTACTACAAAGACAAGAAACAAAGATG	AGAATCAAGATTATACAAGAAAATTACTACAAAGACAAGAAACAAAGATG	AGAATCAAGATTATACAAGAAAATTACTACAAAGACAAGAAACAAAGATG	AGAATCAAGATTATACAAGAAAATTACTACAAAGACAAGAAACAAAGATG	AGAATCAAGATTATACAAGAAAATTACTACAAAGACAAGAAACAAAGATG	AGAATCAAGATTATACAAGAAAATTACTACAAAGACAAGAAACAAAGATG	AGAATCAAGATTATACAAGAAAATTACTACAAAGACAAGAAACAAAGATG	AGAATCAAGATTATACAAGAAAATTACTACAAAGACAAGAAACAAAGATG	AGAATCAAGATTATACAAGAAAATTACTACAAAGACAAGAAACAAAGATG	AGAATCAAGATTATACAAGAAAATTACTACAAAGACAAGAAACAAAGATG
30	ACGTTTGCTTTCTGACTGAGCACGACGAGCGACTAGCTCAATACATGAGT	ACGTTTGCTTTCTGACTGAGCACGACGAGCGACTAGCTCAAGACATGAGT	ACGTTTGCTTTATGACTGAGCACGACGAGCGACTAGCTCAAGACATGAGT	ACGTTTGCATTATGACTGAGCACGACGAGCGACTAGCTCAAGACATGAGT	ACGTTTGCATTATGACTGAGCACGACGAGCGACTAGCTCAAGACAAGAGT	ACGTTTGCATTATGACTGAGCACGACGAGCGACTAGCTCAAGACAAGAAT	ACGTTTGCATTATGACTGAGCAAGACGAGCGACTAGCTCAAGACAAGAAT	ACGTTTGCATTATGACTGAGCAAGACAAGCGACTAGCTCAAGACAAGAAT	ACGTTTGCATTATGACTGAGCAAGACAAGCAACTAGCTCAAGACAAGAAT	ACGTTTGCATTATGACTGAGCAAGACAAGAAACTAGCTCAAGACAAGAAT	ACGTTTGCATTATGACTGAGCAAGACAAGAAACAAGCTCAAGACAAGAAT	ACGTTTGCATTATGACTGAGCAAGACAAGAAACAAGATCAAGACAAGAAT	ACGTTTGCATTATGACTGAGCAAGACAAGAAACAAGATCAAGACAAGAAG	ACGTTTGCATTATGACTAAGCAAGACAAGAAACAAGATCAAGACAAGAAG	ACGTTTGCATTATGACTAAACAAGACAAGAAACAAGATCAAGACAAGAAG	ACGTTTGCAATATGACTAAACAAGACAAGAAACAAGATCAAGACAAGAAG	AGGTTTGCAATATGACTAAACAAGACAAGAAACAAGATCAAGACAAGAAG	AGATTTGCAATATGACTAAACAAGACAAGAAACAAGATCAAGACAAGAAG	AGATTTACAATATGACTAAACAAGACAAGAAACAAGATCAAGACAAGAAG	AGAATTACAATATGACTAAACAAGACAAGAAACAAGATCAAGACAAGAAG	AGAATTACAATATGACTAAACAAGACAAGAAACAAGATCAAGACAAGATG	AGAAATACAATATGACTAAACAAGACAAGAAACAAGATCAAGACAAGATG	AGAAATACAATATGACTAAACAAGACAAGAAACAAGATCAAGACAAGATG	AGAAATACAATATGACTAAACAAGACAAGAAACAAGATCAAGACAAGATG	AGAAATACAATATGACTAAACAAGACAAGAAACAAGATCAAGACAAGATG	AGAAATACAATATGACTAAACAAGACAAGAAACAAGATCAAGACAAGATG	AGAAATACAATATGACTAAACAAGACAAGAAACAAGATCAAGACAAGATG	AGAAATACAATATGACTAAACAAGACAAGAAACAAGATCAAGACAAGATG	AGAAATACAATATGACTAAACAAGACAAGAAACAAGATCAAGACAAGATG	AGAAATACAATATGACTAAACAAGACAAGAAACAAGATCAAGACAAGATG	AGAAATACAATATGACTAAACAAGACAAGAAACAAGATCAAGACAAGATG	AGAAATACAATATGACTAAACAAGACAAGAAACAAGATCAAGACAAGATG	AGAAATACAATATGACTAAACAAGACAAGAAACAAGATCAAGACAAGATG	AGAAATACAATATGACTAAACAAGACAAGAAACAAGATCAAGACAAGATG	AGAAATACAATATGACTAAACAAGACAAGAAACAAGATCAAGACAAGATG	AGAAATACAATATGACTAAACAAGACAAGAAACAAGATCAAGACAAGATG	AGAAATACAATATGACTAAACAAGACAAGAAACAAGATCAAGACAAGATG	AGAAATACAATATGACTAAACAAGACAAGAAACAAGATCAAGACAAGATG	AGAAATACAATATGACTAAACAAGACAAGAAACAAGATCAAGACAAGATG	AGAAATACAATATGACTAAACAAGACAAGAAACAAGATCAAGACAAGATG	AGAAATACAATATGACTAAACAAGACAAGAAACAAGATCAAGACAAGATG
31	TATAAGTACCAAGCCAGTTAGCCTTCCCGCCAACTCCGGAACAGTAACTT	TATAAGTACCAAGCCAGTTAGCCTTCCCGCCAACTCCGGAACAGTAAATT	TATAAGTACCAAGCAAGTTAGCCTTCCCGCCAACTCCGGAACAGTAAATT	TATAAGTACCAAGCAAGTTATCCTTCCCGCCAACTCCGGAACAGTAAATT	TAGAAGTACCAAGCAAGTTATCCTTCCCGCCAACTCCGGAACAGTAAATT	TAGAAGTACCAAGCAAGTTATCCTTCCCGCCAACTCCGGAACAGTAAATA	TAGAAGTACCAAGCAAGTTATCCTTCCCGCCAACTCCGGAACAGTACATA	TAGAAGTACCAAGCAAGTTATCCTTCCCGCCAAGTCCGGAACAGTACATA	TAGAAGTACCAAGCAAGTTATCCTTCCCGCCAAGACCGGAACAGTACATA	TAGAAGTACCAAGCAAGTTATACTTCCCGCCAAGACCGGAACAGTACATA	TAGAAGTACCAAGCAAGTTATACATCCCGCCAAGACCGGAACAGTACATA	TAGAAGTACAAAGCAAGTTATACATCCCGCCAAGACCGGAACAGTACATA	TAGAAGTACAAAGCAAGATATACATCCCGCCAAGACCGGAACAGTACATA	TAGAAGTACAAAGCAAGATATACATCCCGCCAAGACCGGAACACTACATA	TAGAAGTACAAAGCAAGATATACATCCCGCCAAGACAGGAACACTACATA	TAGAAGTACAAAGCAAGATATACATCCCGCCAAGACAAGAACACTACATA	TAGAAGTACAAAGCAAGATATACATCCCGTCAAGACAAGAACACTACATA	TAGAAGTACAAAGCAAGATATACATCCCGTCAAGACAAGAAAACTACATA	TAGAAGTACAAAGCAAGATATACATCCAGTCAAGACAAGAAAACTACATA	TAGAAGTACAAAGCAAGATATACATACAGTCAAGACAAGAAAACTACATA	TAGAAGTACAAAGCAAGATATATATACAGTCAAGACAAGAAAACTACATA	TAGAAGTACAAAGCAAGATATATATAAAGTCAAGACAAGAAAACTACATA	TAGAAGTACAAAGCAAGATATATATAAAGTTAAGACAAGAAAACTACATA	TAGAAGTACAAAGCAAGATATATATAAAGTTAAGACAAGAAAACTACAAA	AAGAAGTACAAAGCAAGATATATATAAAGTTAAGACAAGAAAACTACAAA	AAGAAGTACAAAGCAAGCTATATATAAAGTTAAGACAAGAAAACTACAAA	AAGAACTACAAAGCAAGCTATATATAAAGTTAAGACAAGAAAACTACAAA	AAGAACTACAAAGCAAGCTATATATAAAGTTAAGACAAGAAAACTACAAG	AAGAACTACAAAGCAAGCTATATATAAAGTTAAGACAAGAAAACTACAAG	AAGAACTACAAAGCAAGCTATATATAAAGTTAAGACAAGAAAACTACAAG	AAGAACTACAAAGCAAGCTATATATAAAGTTAAGACAAGAAAACTACAAG	AAGAACTACAAAGCAAGCTATATATAAAGTTAAGACAAGAAAACTACAAG	AAGAACTACAAAGCAAGCTATATATAAAGTTAAGACAAGAAAACTACAAG	AAGAACTACAAAGCAAGCTATATATAAAGTTAAGACAAGAAAACTACAAG	AAGAACTACAAAGCAAGCTATATATAAAGTTAAGACAAGAAAACTACAAG	AAGAACTACAAAGCAAGCTATATATAAAGTTAAGACAAGAAAACTACAAG	AAGAACTACAAAGCAAGCTATATATAAAGTTAAGACAAGAAAACTACAAG	AAGAACTACAAAGCAAGCTATATATAAAGTTAAGACAAGAAAACTACAAG	AAGAACTACAAAGCAAGCTATATATAAAGTTAAGACAAGAAAACTACAAG	AAGAACTACAAAGCAAGCTATATATAAAGTTAAGACAAGAAAACTACAAG	AAGAACTACAAAGCAAGCTATATATAAAGTTAAGACAAGAAAACTACAAG
32	TTAAAGTATTAGACGCATCATAACGTTTGAAAACGTTGCAGTATTGAAGT	TAAAAGTATTAGACGCATCATAACGTTTGAAAACGTTGCAGTATTGAAGT	TAAAAGTATTAGACGCATCATAACGTTTGAAAACGTTGCAGTATTCAAGT	TAAAAGTATTAGACGCATCATAACGTTTGAAAACGTTGCAGTATTCAAGA	TAAAAGTATTAGACGCATCATAACGTTTGAAAACGTTGCAGAATTCAAGA	TACAAGTATTAGACGCATCATAACGTTTGAAAACGTTGCAGAATTCAAGA	TACAAGTATTAGACGCAACATAACGTTTGAAAACGTTGCAGAATTCAAGA	TACAAGTATTAGACGCTACATAACGTTTGAAAACGTTGCAGAATTCAAGA	TACAAGTATTAGACACTACATAACGTTTGAAAACGTTGCAGAATTCAAGA	TACAAGTATTAGAAACTACATAACGTTTGAAAACGTTGCAGAATTCAAGA	TACAAGTATAAGAAACTACATAACGTTTGAAAACGTTGCAGAATTCAAGA	TACAAGTATAAGAAACTACATAACGTTTGATAACGTTGCAGAATTCAAGA	TACAAGTATAAGAAACTACATAACGTTTTATAACGTTGCAGAATTCAAGA	TACAAGTATAAGAAACTACATAACGTTATATAACGTTGCAGAATTCAAGA	TACAAGTATAAGAAACTACATAACGTTATATAAAGTTGCAGAATTCAAGA	TACAAGTATAAGAAACTACATAACGTTATATAAAGTTACAGAATTCAAGA	TACAAGTATAAGAAACTACATAACGTTATATAAATTTACAGAATTCAAGA	TACAAGTACAAGAAACTACATAACGTTATATAAATTTACAGAATTCAAGA	TACAAGTACAAGAAACTACATAAAGTTATATAAATTTACAGAATTCAAGA	TACAAGTACAAGAAACTACATAAAGTTATATAAATTTACAAAATTCAAGA	TACAAGTACAAGAAACTACATAAAGTTATATAAATTTACAAGATTCAAGA	TACAAGTACAAGAAACTACATAAAGTTATATAAATTTACAAGAATCAAGA	TACAAGTACAAGAAACTACATAAATTTATATAAATTTACAAGAATCAAGA	TACAAGTACAAGAAACTATATAAATTTATATAAATTTACAAGAATCAAGA	TACAAGTACAAGAAACTATATAAATTTATATAAATATACAAGAATCAAGA	TACAAGTACAAGAAACTATATAAATTTATATAAATAAACAAGAATCAAGA	TACAAGTACAAGAAACTATATAAATTTACATAAATAAACAAGAATCAAGA	TACAAGTCCAAGAAACTATATAAATTTACATAAATAAACAAGAATCAAGA	TACAAGTCCAAGAAACTATATAAATTTACATAAATAAACAAGAATCAAGA	TACAAGTCCAAGAAACTATATAAATTTACATAAATAAACAAGAATCAAGA	TACAAGTCCAAGAAACTATATAAATTTACATAAATAAACAAGAATCAAGA	TACAAGTCCAAGAAACTATATAAATTTACATAAATAAACAAGAATCAAGA	TACAAGTCCAAGAAACTATATAAATTTACATAAATAAACAAGAATCAAGA	TACAAGTCCAAGAAACTATATAAATTTACATAAATAAACAAGAATCAAGA	TACAAGTCCAAGAAACTATATAAATTTACATAAATAAACAAGAATCAAGA	TACAAGTCCAAGAAACTATATAAATTTACATAAATAAACAAGAATCAAGA	TACAAGTCCAAGAAACTATATAAATTTACATAAATAAACAAGAATCAAGA	TACAAGTCCAAGAAACTATATAAATTTACATAAATAAACAAGAATCAAGA	TACAAGTCCAAGAAACTATATAAATTTACATAAATAAACAAGAATCAAGA	TACAAGTCCAAGAAACTATATAAATTTACATAAATAAACAAGAATCAAGA	TACAAGTCCAAGAAACTATATAAATTTACATAAATAAACAAGAATCAAGA
33	GGTGATTAGACAGAGTGTCAGCACCACTATTCAGGCACGGACGGCACATG	GGTGATTAGACAGAGTGTCAGCACCACTATTCAGACACGGACGGCACATG	GGTGATTAGACAGAGTGTCAGCACCACTATTCAGACACGGACGGAACATG	GGTGATTAGACAGAGTGTCAGCACCACTATTCAGACACGAACGGAACATG	GGTGATTAGACAGAGTGTCAGCACCACTATTAAGACACGAACGGAACATG	GGTGATTAGACAGAGTGTCAGCACCACTATTAAGACAAGAACGGAACATG	GGTGATTAGACAGAGTGTCAGCACTACTATTAAGACAAGAACGGAACATG	GGTGATTAGACAGAGTATCAGCACTACTATTAAGACAAGAACGGAACATG	GGTGATTATACAGAGTATCAGCACTACTATTAAGACAAGAACGGAACATG	AGTGATTATACAGAGTATCAGCACTACTATTAAGACAAGAACGGAACATG	AGTGATTATACAGAGTATCAGCACTACTACTAAGACAAGAACGGAACATG	AGTGATTATACAGAGTATAAGCACTACTACTAAGACAAGAACGGAACATG	AGTGATTATACAGACTATAAGCACTACTACTAAGACAAGAACGGAACATG	AGTGATTATACAGACTATAAGAACTACTACTAAGACAAGAACGGAACATG	AGTGATTATACAGACTATAAAAACTACTACTAAGACAAGAACGGAACATG	AGTGATTATACAGACTATAAAAACTACTACTAAGACAAGAACGGAACAAG	AGTGATTATACAGACTATAAAAACTACTACTAAGACAAGAACAGAACAAG	AGTGATTATACAGACTATAAAAACTACTACTAAGACAAGAACAGTACAAG	AGAGATTATACAGACTATAAAAACTACTACTAAGACAAGAACAGTACAAG	AGAGATTATACAAACTATAAAAACTACTACTAAGACAAGAACAGTACAAG	AGAAATTATACAAACTATAAAAACTACTACTAAGACAAGAACAGTACAAG	AGAAACTATACAAACTATAAAAACTACTACTAAGACAAGAACAGTACAAG	AGAAACTATATAAACTATAAAAACTACTACTAAGACAAGAACAGTACAAG	AGAAACTATATAAACTATAAAAACTACTACTAAGACAAGAAAAGTACAAG	AGAAACTATATAAACTATAAAAACTACTACTAAGACAAGAAAACTACAAG	AGAAACTATATAAACTATAAAAACTACTACTAAGACAAGAATACTACAAG	AGAAACTATATAAACTATAAAAACTACTACTAAGACAAGATTACTACAAG	AGAAACTATATAAACTATAAAAACTACTACTAAGACAAGATTACTACAAG	AGAAACTATATAAACTATAAAAACTACTACTAAGACAAGATTACTACAAG	AGAAACTATATAAACTATAAAAACTACTACTAAGACAAGATTACTACAAG	AGAAACTATATAAACTATAAAAACTACTACTAAGACAAGATTACTACAAG	AGAAACTATATAAACTATAAAAACTACTACTAAGACAAGATTACTACAAG	AGAAACTATATAAACTATAAAAACTACTACTAAGACAAGATTACTACAAG	AGAAACTATATAAACTATAAAAACTACTACTAAGACAAGATTACTACAAG	AGAAACTATATAAACTATAAAAACTACTACTAAGACAAGATTACTACAAG	AGAAACTATATAAACTATAAAAACTACTACTAAGACAAGATTACTACAAG	AGAAACTATATAAACTATAAAAACTACTACTAAGACAAGATTACTACAAG	AGAAACTATATAAACTATAAAAACTACTACTAAGACAAGATTACTACAAG	AGAAACTATATAAACTATAAAAACTACTACTAAGACAAGATTACTACAAG	AGAAACTATATAAACTATAAAAACTACTACTAAGACAAGATTACTACAAG	AGAAACTATATAAACTATAAAAACTACTACTAAGACAAGATTACTACAAG
34	CTCTTGACGCTAAATCCCCGCTTCTTACCATTATTTCGACGCGACGCACC	CTCTAGACGCTAAATCCCCGCTTCTTACCATTATTTCGACGCGACGCACC	CTCTAGACGCTAAATCCCCGCTTCTTACAATTATTTCGACGCGACGCACC	CTCTAGACGCTAAATCCCCGCTTTTTACAATTATTTCGACGCGACGCACC	CTATAGACGCTAAATCCCCGCTTTTTACAATTATTTCGACGCGACGCACC	CTATATACGCTAAATCCCCGCTTTTTACAATTATTTCGACGCGACGCACC	CTATATACGCTAAATCCCCGCTTTTTACAATTATTTAGACGCGACGCACC	CTATATACGCTAAATCCCCGCTTTTTACAATTATTTAGACACGACGCACC	CTATATACGCTAAATCCCCGCTTTTTACAATTATTTAGACAAGACGCACC	CTATATACGCTAAATCCCCGCTTTTTACAATTATATAGACAAGACGCACC	CTATATACACTAAATCCCCGCTTTTTACAATTATATAGACAAGACGCACC	CTATATACACTAAATCCCCGCTTTTTACAATTATATAGACAAGACTCACC	CTATATACACTAAATCCCCGCTTTTTACAATTATATAGACAAGACTAACC	CTATATACACTAAATCCCCGCTATTTACAATTATATAGACAAGACTAACC	CTATATACACTAAATCCCAGCTATTTACAATTATATAGACAAGACTAACC	CTATATACACTAAATCCAAGCTATTTACAATTATATAGACAAGACTAACC	CTATATACACTAAATACAAGCTATTTACAATTATATAGACAAGACTAACC	CTATATACACTATATACAAGCTATTTACAATTATATAGACAAGACTAACC	CTATATAAACTATATACAAGCTATTTACAATTATATAGACAAGACTAACC	CTATATAAACTATATACAAACTATTTACAATTATATAGACAAGACTAACC	CTATATAAACTATATACAAACTATTTACAATTATATATACAAGACTAACC	CTATATAAACTATATACAAACTATTTACAATTATATATACAAGACTAACT	CTATATAAACTATATACAAACTATTTACAAATATATATACAAGACTAACT	CTATATAAACTATATACAAACTATTTACAAAGATATATACAAGACTAACT	CTATATAAACTATATACAAACTATTTACAAAGATATATACAAGATTAACT	CTATATAAACTATATACAAACTATTTACAAAGATATATACAAGATTTACT	TTATATAAACTATATACAAACTATTTACAAAGATATATACAAGATTTACT	TTATATAAACTATATACAAACTATTTACAAAGTTATATACAAGATTTACT	TTATATAAACTATATACAAACTATTTACAAAGTTATATACAAGAATTACT	TTATATAAACTATATACAAACTATTTACAAAGTTATATACAAGAATTACT	TTATATAAACTATATACAAACTATTTACAAAGTTATATACAAGAATTACT	TTATATAAACTATATACAAACTATTTACAAAGTTATATACAAGAATTACT	TTATATAAACTATATACAAACTATTTACAAAGTTATATACAAGAATTACT	TTATATAAACTATATACAAACTATTTACAAAGTTATATACAAGAATTACT	TTATATAAACTATATACAAACTATTTACAAAGTTATATACAAGAATTACT	TTATATAAACTATATACAAACTATTTACAAAGTTATATACAAGAATTACT	TTATATAAACTATATACAAACTATTTACAAAGTTATATACAAGAATTACT	TTATATAAACTATATACAAACTATTTACAAAGTTATATACAAGAATTACT	TTATATAAACTATATACAAACTATTTACAAAGTTATATACAAGAATTACT	TTATATAAACTATATACAAACTATTTACAAAGTTATATACAAGAATTACT	TTATATAAACTATATACAAACTATTTACAAAGTTATATACAAGAATTACT
35	AGATGCGCCTTCAAAGCCGTGGGACAGGGTTAATGTGTCTAGATAGAATC	AGATACGCCTTCAAAGCCGTGGGACAGGGTTAATGTGTCTAGATAGAATC	AGATACGCCTTCAAAGCCGTGAGACAGGGTTAATGTGTCTAGATAGAATC	AGATACGCCTACAAAGCCGTGAGACAGGGTTAATGTGTCTAGATAGAATC	AGATACGCCTACAAAGCCGTGAGACAGGATTAATGTGTCTAGATAGAATC	AGATACGACTACAAAGCCGTGAGACAGGATTAATGTGTCTAGATAGAATC	AGATACGACTACAAAGCCGTGAGACAGGATTAATGTGTCTAGATAGAATG	AGATACGACTACAAAGCCGTGAGACAGGATTAAAGTGTCTAGATAGAATG	AGATACGACTACAAAGCCGTGAGACAAGATTAAAGTGTCTAGATAGAATG	AGATACTACTACAAAGCCGTGAGACAAGATTAAAGTGTCTAGATAGAATG	AGATACTACTACAAAGCAGTGAGACAAGATTAAAGTGTCTAGATAGAATG	AGATACTACTACAAAGCAGTGAGACAAGATTAAAGTGTATAGATAGAATG	AGATACTACTACAAAGCAGTGAGACAAGATTAAAGTATATAGATAGAATG	AGATACTACTACAAAGCAGTGAGACAAGATTAAACTATATAGATAGAATG	AGATACTACTACAAAGCAGTGAGACAAGATTAAACTATATAGATAAAATG	AGATACTACTACAAAGCAGAGAGACAAGATTAAACTATATAGATAAAATG	AGATACTACTACAAAGCAAAGAGACAAGATTAAACTATATAGATAAAATG	AGATACTACTACAAAGCTAAGAGACAAGATTAAACTATATAGATAAAATG	AGATACTACTACAAAGATAAGAGACAAGATTAAACTATATAGATAAAATG	AGATACTACTACAAAGACAAGAGACAAGATTAAACTATATAGATAAAATG	AGATACTACTACAAAGACAAGAAACAAGATTAAACTATATAGATAAAATG	AGATACTACTACAAAGACAAGAAACAAGATTAAACTATATATATAAAATG	AGATACTACTACAAAGACAAGAAACAAGACTAAACTATATATATAAAATG	AGAAACTACTACAAAGACAAGAAACAAGACTAAACTATATATATAAAATG	AGAAAGTACTACAAAGACAAGAAACAAGACTAAACTATATATATAAAATG	AGAAAGTCCTACAAAGACAAGAAACAAGACTAAACTATATATATAAAATG	AGAAAGTCCTACAAAGACAAGAAACAAGACTAAACTATATATACAAAATG	AGAAAGTCCTACAAAGACAAGAAACAAGACTAAACTATATATACAAGATG	AGAAAGTCCTACAAAGACAAGAAATAAGACTAAACTATATATACAAGATG	AGAAAGTCCTACAAAGACAAGAAATAAGACTAAACTATATATACAAGATG	AGAAAGTCCTACAAAGACAAGAAATAAGACTAAACTATATATACAAGATG	AGAAAGTCCTACAAAGACAAGAAATAAGACTAAACTATATATACAAGATG	AGAAAGTCCTACAAAGACAAGAAATAAGACTAAACTATATATACAAGATG	AGAAAGTCCTACAAAGACAAGAAATAAGACTAAACTATATATACAAGATG	AGAAAGTCCTACAAAGACAAGAAATAAGACTAAACTATATATACAAGATG	AGAAAGTCCTACAAAGACAAGAAATAAGACTAAACTATATATACAAGATG	AGAAAGTCCTACAAAGACAAGAAATAAGACTAAACTATATATACAAGATG	AGAAAGTCCTACAAAGACAAGAAATAAGACTAAACTATATATACAAGATG	AGAAAGTCCTACAAAGACAAGAAATAAGACTAAACTATATATACAAGATG	AGAAAGTCCTACAAAGACAAGAAATAAGACTAAACTATATATACAAGATG	AGAAAGTCCTACAAAGACAAGAAATAAGACTAAACTATATATACAAGATG
36	CAAAGCGCGCCGATGTGGGCCTAGCCGAGTAATCCGTGACTCCGCTTACA	CAAAGCGCGCCGATTTGGGCCTAGCCGAGTAATCCGTGACTCCGCTTACA	CAAAGCGCGCCGATTTGAGCCTAGCCGAGTAATCCGTGACTCCGCTTACA	CAAAGCGCGCCGATTTGAGCCTAGCCGAGTAATCCATGACTCCGCTTACA	CAAAGCGCACCGATTTGAGCCTAGCCGAGTAATCCATGACTCCGCTTACA	CAAAGCGCACCGATTTGAGACTAGCCGAGTAATCCATGACTCCGCTTACA	CAAAGCGCACCGATTTGAGACTAGACGAGTAATCCATGACTCCGCTTACA	CAAAGCGCACCGATTTGAGACTAGACTAGTAATCCATGACTCCGCTTACA	AAAAGCGCACCGATTTGAGACTAGACTAGTAATCCATGACTCCGCTTACA	AAAAGCCCACCGATTTGAGACTAGACTAGTAATCCATGACTCCGCTTACA	AAAAGCCCAACGATTTGAGACTAGACTAGTAATCCATGACTCCGCTTACA	AAAAGCCCAAAGATTTGAGACTAGACTAGTAATCCATGACTCCGCTTACA	AAAAGCCCAAAGATTTGAGACTAGACTAGTAAGCCATGACTCCGCTTACA	AAAAGCCCAAAGATTTGAGACTAGACTAGTAAGCCATGACTGCGCTTACA	AAAAGCCCAAAGATTTGAGACTAGACTACTAAGCCATGACTGCGCTTACA	AAAAGCCCAAAGATTTAAGACTAGACTACTAAGCCATGACTGCGCTTACA	AAAAGCCCAAAGATTTAAGACAAGACTACTAAGCCATGACTGCGCTTACA	AAAAGCCCAAAGATTTAAGACAAGACTACAAAGCCATGACTGCGCTTACA	AAAAGCCCAAAGATTTAAGACAAGACTACAAAGCCATGACTGCGGTTACA	AAAAGCCCAAAGATTTAAGACAAGACTACAAAGACATGACTGCGGTTACA	AAAAGCCCCAAGATTTAAGACAAGACTACAAAGACATGACTGCGGTTACA	AAAAGTCCCAAGATTTAAGACAAGACTACAAAGACATGACTGCGGTTACA	AAAAGTCCCAAGATTTAAGACAAGACTACAAAGACAAGACTGCGGTTACA	AAAAGTCCCAAGATTTAAGACAAGACTACAAAGACAAGACTACGGTTACA	AAAAGTCCCAAGATTTAAGACAAGACTACAAAGACAAGACTACGATTACA	AAAAGTCCCAAGATTTAAGACAAGACTACAAAGACAAGACTAAGATTACA	AAAAGTCCCAAGATTTAAGTCAAGACTACAAAGACAAGACTAAGATTACA	AAAAGTCCCAAGATTTAAATCAAGACTACAAAGACAAGACTAAGATTACA	AAAAGTCCCAAGATTTAAATCAAGACTACAAAGACAAGACTAAGATTACA	AAAAGTCCCAAGATTTAAATCAAGACTACAAAGACAAGACTAAGATTACA	AAAAGTCCCAAGATTTAAATCAAGACTACAAAGACAAGACTAAGATTACA	AAAAGTCCCAAGATTTAAATCAAGACTACAAAGACAAGACTAAGATTACA	AAAAGTCCCAAGATTTAAATCAAGACTACAAAGACAAGACTAAGATTACA	AAAAGTCCCAAGATTTAAATCAAGACTACAAAGACAAGACTAAGATTACA	AAAAGTCCCAAGATTTAAATCAAGACTACAAAGACAAGACTAAGATTACA	AAAAGTCCCAAGATTTAAATCAAGACTACAAAGACAAGACTAAGATTACA	AAAAGTCCCAAGATTTAAATCAAGACTACAAAGACAAGACTAAGATTACA	AAAAGTCCCAAGATTTAAATCAAGACTACAAAGACAAGACTAAGATTACA	AAAAGTCCCAAGATTTAAATCAAGACTACAAAGACAAGACTAAGATTACA	AAAAGTCCCAAGATTTAAATCAAGACTACAAAGACAAGACTAAGATTACA	AAAAGTCCCAAGATTTAAATCAAGACTACAAAGACAAGACTAAGATTACA
37	CACTTTGCCATTCCCCATGGTCCGAACTCGCTCACACGGTTGAAGTACTC	CACTTTGCCATTCCCCATAGTCCGAACTCGCTCACACGGTTGAAGTACTC	GACTTTGCCATTCCCCATAGTCCGAACTCGCTCACACGGTTGAAGTACTC	GACTTTGCCATTCCCCATAGTCCGAACTCGCTCACAAGGTTGAAGTACTC	GACTTTGCCATTCCCCATAGTCCGAACTCGCTCACAAGATTGAAGTACTC	GACTTTGCCATTCCCCATAGTCCGAACTCGCTCACAAGATTCAAGTACTC	GACTTTGCCATTCCCCAAAGTCCGAACTCGCTCACAAGATTCAAGTACTC	GACTTTGCCATTCCCCAAAGTCCGAACTCGCTCACAAGATTCAAGTACTA	GACTTTGCCATTCCACAAAGTCCGAACTCGCTCACAAGATTCAAGTACTA	GACTTTGCCATTCTACAAAGTCCGAACTCGCTCACAAGATTCAAGTACTA	GACTTTGCCATTCTACAAAGTCCGAACTCGCACACAAGATTCAAGTACTA	GACTTTGCCATTCTACAAAGTCCGAACTCGCACACAAGATTCAACTACTA	GACTTTGCCATTCTACAAAGTCCGAACTCGCACACAAGATTTAACTACTA	GACTTTGCCATTCTACAAAGACCGAACTCGCACACAAGATTTAACTACTA	GACTTTGCCATTCTACAAAGACAGAACTCGCACACAAGATTTAACTACTA	GACTTTGCCATTCTACAAAGACAGAACTCGCAGACAAGATTTAACTACTA	GACTTTGCCATACTACAAAGACAGAACTCGCAGACAAGATTTAACTACTA	GACTTTGCAATACTACAAAGACAGAACTCGCAGACAAGATTTAACTACTA	GACTTTGCAAAACTACAAAGACAGAACTCGCAGACAAGATTTAACTACTA	GACTTTACAAAACTACAAAGACAGAACTCGCAGACAAGATTTAACTACTA	TACTTTACAAAACTACAAAGACAGAACTCGCAGACAAGATTTAACTACTA	TACTATACAAAACTACAAAGACAGAACTCGCAGACAAGATTTAACTACTA	TACTATACAAAACTACAAAGACAGAAATCGCAGACAAGATTTAACTACTA	TACTATACAAAACTACAAAGACAGAAATCGCAGACAAGAATTAACTACTA	TACTATACAAAACTACAAAGACAGAAATCACAGACAAGAATTAACTACTA	TACTATACAAAACTACAAAGACAGAAATTACAGACAAGAATTAACTACTA	TACTATACAAAACTACAAAGACAGAAACTACAGACAAGAATTAACTACTA	TACTATACAAAACTACAAAGACAGAAACTACAAACAAGAATTAACTACTA	AACTATACAAAACTACAAAGACAGAAACTACAAACAAGAATTAACTACTA	AACTATACAAAACTACAAAGACAGAAACTACAAACAAGAATTAACTACTA	AACTATACAAAACTACAAAGACAGAAACTACAAACAAGAATTAACTACTA	AACTATACAAAACTACAAAGACAGAAACTACAAACAAGAATTAACTACTA	AACTATACAAAACTACAAAGACAGAAACTACAAACAAGAATTAACTACTA	AACTATACAAAACTACAAAGACAGAAACTACAAACAAGAATTAACTACTA	AACTATACAAAACTACAAAGACAGAAACTACAAACAAGAATTAACTACTA	AACTATACAAAACTACAAAGACAGAAACTACAAACAAGAATTAACTACTA	AACTATACAAAACTACAAAGACAGAAACTACAAACAAGAATTAACTACTA	AACTATACAAAACTACAAAGACAGAAACTACAAACAAGAATTAACTACTA	AACTATACAAAACTACAAAGACAGAAACTACAAACAAGAATTAACTACTA	AACTATACAAAACTACAAAGACAGAAACTACAAACAAGAATTAACTACTA	AACTATACAAAACTACAAAGACAGAAACTACAAACAAGAATTAACTACTA
38	TAGAATCGGGTCGAACTGACTCCGGCAAGTACCGTCAGGTGGGTTACCAA	TAGAATCGGGTCGAACTGACTCCGGCAAGTACCGTCAGGTGGGTTACAAA	TAGAATCGGATCGAACTGACTCCGGCAAGTACCGTCAGGTGGGTTACAAA	TAGAATCGGATCGAACTGACTCCGGCAAGTACCGTCAGGTGAGTTACAAA	TAGAATCGGATCGAACTGACTCCGGCAAGTACCGTCAGGTGAGTTACAAG	TAGAATCGGATCGAACTGACTCCGGCAAGTACCGTCAAGTGAGTTACAAG	TAGAATCGGATCGAACTGACTCCGGCAAGTACCGTCAAGAGAGTTACAAG	TAGAATCGGATCGAACTGACTCCGGCAAGTACAGTCAAGAGAGTTACAAG	TAGAATCGGATCGAACTAACTCCGGCAAGTACAGTCAAGAGAGTTACAAG	TAGAATCGGATCGAACTAAGTCCGGCAAGTACAGTCAAGAGAGTTACAAG	TAGAATCGGATCGAACTAAGTCCAGCAAGTACAGTCAAGAGAGTTACAAG	TAGAATCGCATCGAACTAAGTCCAGCAAGTACAGTCAAGAGAGTTACAAG	TAGAATCGCATAGAACTAAGTCCAGCAAGTACAGTCAAGAGAGTTACAAG	TAGAATCGCATAGAACTAAGTCCAACAAGTACAGTCAAGAGAGTTACAAG	TAGAATCGCATAGAACTAAGTCCTACAAGTACAGTCAAGAGAGTTACAAG	TAGAATCGCATATAACTAAGTCCTACAAGTACAGTCAAGAGAGTTACAAG	TAGAATCGTATATAACTAAGTCCTACAAGTACAGTCAAGAGAGTTACAAG	TAGAATCGTATATAACTAAGTCCTACAAGTACAGACAAGAGAGTTACAAG	TAGAATCGTATATAACTAAGTCCTACAAGTACAGACAAGACAGTTACAAG	TAGAATCGTATATAAGTAAGTCCTACAAGTACAGACAAGACAGTTACAAG	TACAATCGTATATAAGTAAGTCCTACAAGTACAGACAAGACAGTTACAAG	TACAAACGTATATAAGTAAGTCCTACAAGTACAGACAAGACAGTTACAAG	TACAAACGTATATAAGTAAGTCCTACAAGTACAGACAAGACAATTACAAG	TACAAACGTATATAAGTAAGTCCTACAAGTACAGACAAGACAAGTACAAG	TACAAACGTATATAAGTAAGTCCTACAACTACAGACAAGACAAGTACAAG	TACAAAAGTATATAAGTAAGTCCTACAACTACAGACAAGACAAGTACAAG	TACAAAAGTATTTAAGTAAGTCCTACAACTACAGACAAGACAAGTACAAG	TACAAGAGTATTTAAGTAAGTCCTACAACTACAGACAAGACAAGTACAAG	TACAAGAGTATTTAAATAAGTCCTACAACTACAGACAAGACAAGTACAAG	TACAAGAGTATTTAAATAAGTACTACAACTACAGACAAGACAAGTACAAG	TACAAGAGTATTTAAATAAGTACTACAACTACAGACAAGACAAGTACAAG	TACAAGAGTATTTAAATAAGTACTACAACTACAGACAAGACAAGTACAAG	TACAAGAGTATTTAAATAAGTACTACAACTACAGACAAGACAAGTACAAG	TACAAGAGTATTTAAATAAGTACTACAACTACAGACAAGACAAGTACAAG	TACAAGAGTATTTAAATAAGTACTACAACTACAGACAAGACAAGTACAAG	TACAAGAGTATTTAAATAAGTACTACAACTACAGACAAGACAAGTACAAG	TACAAGAGTATTTAAATAAGTACTACAACTACAGACAAGACAAGTACAAG	TACAAGAGTATTTAAATAAGTACTACAACTACAGACAAGACAAGTACAAG	TACAAGAGTATTTAAATAAGTACTACAACTACAGACAAGACAAGTACAAG	TACAAGAGTATTTAAATAAGTACTACAACTACAGACAAGACAAGTACAAG	TACAAGAGTATTTAAATAAGTACTACAACTACAGACAAGACAAGTACAAG
39	CCGGTATCGTATCAGTTTCCCCGAGGCTAGGGAGGGGTTTTAGCCGGGAC	CCGGTATGGTATCAGTTTCCCCGAGGCTAGGGAGGGGTTTTAGCCGGGAC	CCGGTATGGTATCAGTTTCCCCGAGGCTAGGGATGGGTTTTAGCCGGGAC	CCGGTATGGTATCAGTTTCCCCGAGGCTAGAGATGGGTTTTAGCCGGGAC	CCGGTATGATATCAGTTTCCCCGAGGCTAGAGATGGGTTTTAGCCGGGAC	CCGGTATGAGATCAGTTTCCCCGAGGCTAGAGATGGGTTTTAGCCGGGAC	CCGGTATGAGATCAGTTTCCCCGAGGTTAGAGATGGGTTTTAGCCGGGAC	CCAGTATGAGATCAGTTTCCCCGAGGTTAGAGATGGGTTTTAGCCGGGAC	CAAGTATGAGATCAGTTTCCCCGAGGTTAGAGATGGGTTTTAGCCGGGAC	CAAGTATGAGATCAGTTTCCCCGAGGTTAGAGATGGGTTCTAGCCGGGAC	CAAGTATGAGATCAGTTTCCCCGAGGTTAGAGATGGGTTCTAGCCAGGAC	CAAGTATGAGATCAGTTTCCCCGAGGTTAGAGATGGGTTCTAGCCAAGAC	CAAGTATGAGATCAGTTTCCCCGAGGTTAGAGATGAGTTCTAGCCAAGAC	CAAGTATGAGATCAGTTTCCCCGAGGTTAGAGATGAGTTCTAGTCAAGAC	CAAGTATGAGATCAGTTTCCCCGAGGTTAGAGATGAGTTCAAGTCAAGAC	CAAGTATGAGATCAGTTTCCCCGAGGTTAAAGATGAGTTCAAGTCAAGAC	CAAGTATGAGATCAGTTTCCCCGAGGTTAAAGATGAGTTCAAGACAAGAC	CAAGTATGAGATCAGTTTCCCCGAGGTTAAAGATGAGTACAAGACAAGAC	CAAGTATGAGATCAGTTTCCCCGAGGTTCAAGATGAGTACAAGACAAGAC	CAAGTATGAGATCAGTTTCCCCGAAGTTCAAGATGAGTACAAGACAAGAC	CAAGTATGAGATCAGTTTCCCAGAAGTTCAAGATGAGTACAAGACAAGAC	CAAGTATGAGATCAGTTTCCAAGAAGTTCAAGATGAGTACAAGACAAGAC	CAAGTATGAGATCAGTTTCCAAGAAGTACAAGATGAGTACAAGACAAGAC	CAAGTATGAGATCAGATTCCAAGAAGTACAAGATGAGTACAAGACAAGAC	TAAGTATGAGATCAGATTCCAAGAAGTACAAGATGAGTACAAGACAAGAC	TAAGTATAAGATCAGATTCCAAGAAGTACAAGATGAGTACAAGACAAGAC	TAAGTATAAGATAAGATTCCAAGAAGTACAAGATGAGTACAAGACAAGAC	TAAGAATAAGATAAGATTCCAAGAAGTACAAGATGAGTACAAGACAAGAC	TAAGAATAAGATAAGATTACAAGAAGTACAAGATGAGTACAAGACAAGAC	TAAGAATAAGACAAGATTACAAGAAGTACAAGATGAGTACAAGACAAGAC	TAAGAATAAGACAAGACTACAAGAAGTACAAGATGAGTACAAGACAAGAC	TAAGAATAAGACAAGACTACAAGAAGTACAAGATGAATACAAGACAAGAC	TAAGAATAAGACAAGACTACAAGAACTACAAGATGAATACAAGACAAGAC	TAAGAATAAGACAAGACTACAAGAACTACAAGATTAATACAAGACAAGAC	TAAGAATAAGACAAGACTACAAGAACTACAAGATTAAGACAAGACAAGAC	TAAGAATAAGACAAGACTACAAGTACTACAAGATTAAGACAAGACAAGAC	TAAGAATAAGACAAGACTACAAGTACTACAAGATCAAGACAAGACAAGAC	TAAGAATAAGACAAGACTACAAGTACTACAAGTTCAAGACAAGACAAGAC	TAAGAATAAGACAAGACTACAAGTACTACAAATTCAAGACAAGACAAGAC	TAAGAATAAGACAAGACTACAAGTACTACAAATACAAGACAAGACAAGAC	TAAGAATAAGACAAGACTACAAGTACTACAAATACAAGACAAGACAAGAA
40	TATACACTAGACGACTCCAGCCATAAAAGGCGTAAAGCACCACGTCCGTT	TATACACTAGACGACTCAAGCCATAAAAGGCGTAAAGCACCACGTCCGTT	TATACACTAGACGACTCAAGACATAAAAGGCGTAAAGCACCACGTCCGTT	TATACACTAGACGACTCAAGACATAAAAGGCGTAAAGCACCATGTCCGTT	TATACACTAGACGACTCAAGACATAAAAGGCGTAAAGCACCATGACCGTT	TATACACTAGAAGACTCAAGACATAAAAGGCGTAAAGCACCATGACCGTT	TATATACTAGAAGACTCAAGACATAAAAGGCGTAAAGCACCATGACCGTT	TATATACTACAAGACTCAAGACATAAAAGGCGTAAAGCACCATGACCGTT	TATATACTACAAGACTCAAGACATAAAAAGCGTAAAGCACCATGACCGTT	TATATACTACAAGACTCAAGACACAAAAAGCGTAAAGCACCATGACCGTT	TATATACTACAAGACTCAAGACACAAGAAGCGTAAAGCACCATGACCGTT	TATATACTACAAGACTCAAGACACAAGAAACGTAAAGCACCATGACCGTT	TATATAATACAAGACTCAAGACACAAGAAACGTAAAGCACCATGACCGTT	TATATAATACAAGACTCAAGATACAAGAAACGTAAAGCACCATGACCGTT	TATATAATACAAGACTCAAGATACAAGAAACGTCAAGCACCATGACCGTT	TATATAATACAAGACTCAAGATACAAGAAACATCAAGCACCATGACCGTT	TATATAATACAAGACTCAAGATACAAGAAACATCAAGCACCATGACAGTT	TATATAAAACAAGACTCAAGATACAAGAAACATCAAGCACCATGACAGTT	TATATAAAACAAGAATCAAGATACAAGAAACATCAAGCACCATGACAGTT	TATATAAAACAAGAATCAAGATACAAGAAACATCAAGCACCATGACAGGT	TATATAAAACAAGAATCAAGATACAAGAAACATCAAGCACAATGACAGGT	TATATAAAACAAGAATCAAGATACAAGAAACATCAAGAACAATGACAGGT	TATATAAAACAAGAATCAAGATACAAGAAACATCAATAACAATGACAGGT	TATATAAAACAAGAATCAAGATACAAGAAACATCATTAACAATGACAGGT	TATATAAAACAAGAATCAAGATACAAGAAACATTATTAACAATGACAGGT	TATATAAAACAAGAATCAAGATACAAGAAAAATTATTAACAATGACAGGT	TATATAAAACAAGAATCAAGATACAAGAAAAATTATTAACAATGACAAGT	TATATAAAACAAGAATCAAGATACAAGAAAAATTATAAACAATGACAAGT	TATATAAAACAAGAATCAAGATACAAGAAAAATTATAAACAATGACCAGT	TATATAAAGCAAGAATCAAGATACAAGAAAAATTATAAACAATGACCAGT	TATATAAAGCAAGAATCAAGATACAAGAAAAATTATAAACAATGACCAGT	TATATAAAGCAAGAATCAAGATACAAGAAAAATTATAAACAATGACCAGT	TATATAAAGCAAGAATCAAGATACAAGAAAAATTATAAACAATGACCAGT	TATATAAAGCAAGAATCAAGATACAAGAAAAATTATAAACAATGACCAGT	TATATAAAGCAAGAATCAAGATACAAGAAAAATTATAAACAATGACCAGT	TATATAAAGCAAGAATCAAGATACAAGAAAAATTATAAACAATGACCAGT	TATATAAAGCAAGAATCAAGATACAAGAAAAATTATAAACAATGACCAGT	TATATAAAGCAAGAATCAAGATACAAGAAAAATTATAAACAATGACCAGT	TATATAAAGCAAGAATCAAGATACAAGAAAAATTATAAACAATGACCAGT	TATATAAAGCAAGAATCAAGATACAAGAAAAATTATAAACAATGACCAGT	TATATAAAGCAAGAATCAAGATACAAGAAAAATTATAAACAATGACCAGT
41	CTTCTGGCACGGTATGATTACGTAAGCTTGTTGTCGTGTAACTCCGAGAG	CTTCTGGCACGGTAAGATTACGTAAGCTTGTTGTCGTGTAACTCCGAGAG	CTTCTGGCACGGTAAGATTACGTAAGCTTGTTGTCGTGTAACTACGAGAG	CTTCTGGCACGGTAAGATTACGTAAGCTTGTTGTCGTGTAACTACAAGAG	CTTCTGGCACGGTAAGATTACATAAGCTTGTTGTCGTGTAACTACAAGAG	CTTCTGGCACGGTAAGATTACATAAGATTGTTGTCGTGTAACTACAAGAG	CTTCTGGCACGGTAAGATTACACAAGATTGTTGTCGTGTAACTACAAGAG	CTTCTGGCACGGTAAGATTACACAAGATTGTTGTCGAGTAACTACAAGAG	CTTCTGGCACGGTAAGATTACACAAGATTGTTGTCAAGTAACTACAAGAG	CTTCTGGCACGGTAAGATTACACAAGATTGTTGTCAAGAAACTACAAGAG	GTTCTGGCACGGTAAGATTACACAAGATTGTTGTCAAGAAACTACAAGAG	GTTCTTGCACGGTAAGATTACACAAGATTGTTGTCAAGAAACTACAAGAG	GTTCTTGCACGGCAAGATTACACAAGATTGTTGTCAAGAAACTACAAGAG	GTTCTTGCAAGGCAAGATTACACAAGATTGTTGTCAAGAAACTACAAGAG	GTTCTTGCAAGACAAGATTACACAAGATTGTTGTCAAGAAACTACAAGAG	GTACTTGCAAGACAAGATTACACAAGATTGTTGTCAAGAAACTACAAGAG	GTACTTGCAAGACAAGATTACACAAGATTGTTATCAAGAAACTACAAGAG	GTACTTGCAAGACAAGATTACACAAGATTATTATCAAGAAACTACAAGAG	GTACTTGCAAGACAAGATTACACAAGATTACTATCAAGAAACTACAAGAG	GTACTTGCAAGACAAGATTACACAAGACTACTATCAAGAAACTACAAGAG	GTACTTGCAAGACAAGATTACACAAGACTACTATCAAGAAACTACAAGAA	GTACTTGCAAGACAAGATTACACAAGACTACTATCAAGAAAATACAAGAA	GTACTTACAAGACAAGATTACACAAGACTACTATCAAGAAAATACAAGAA	GTACTTACAAGACAAGATTATACAAGACTACTATCAAGAAAATACAAGAA	GTACTTACAAGACAAGATTATACAAGACTACTATCAAGAAAAGACAAGAA	GTACTTACAAGACAAGATTATACAAGACTACTATCAAGACAAGACAAGAA	GTACTTACAAGACAAGATTATACAAGACTACTATTAAGACAAGACAAGAA	GTACTTACAAGACAAGATTATACAAGACTACTACTAAGACAAGACAAGAA	GTACTTACAAGACAAGATTATACAAGACTACTACAAAGACAAGACAAGAA	GTACTTACAAGACAAGATTATACAAGACTACTACAAAGACAAGACAAGAA	GTACTTACAAGACAAGATTATACAAGACTACTACAAAGACAAGACAAGAA	GTACTTACAAGACAAGATTATACAAGACTACTACAAAGACAAGACAAGAA	GTACTTACAAGACAAGATTATACAAGACTACTACAAAGACAAGACAAGAA	GTACTTACAAGACAAGATTATACAAGACTACTACAAAGACAAGACAAGAA	GTACTTACAAGACAAGATTATACAAGACTACTACAAAGACAAGACAAGAA	GTACTTACAAGACAAGATTATACAAGACTACTACAAAGACAAGACAAGAA	GTACTTACAAGACAAGATTATACAAGACTACTACAAAGACAAGACAAGAA	GTACTTACAAGACAAGATTATACAAGACTACTACAAAGACAAGACAAGAA	GTACTTACAAGACAAGATTATACAAGACTACTACAAAGACAAGACAAGAA	GTACTTACAAGACAAGATTATACAAGACTACTACAAAGACAAGACAAGAA	GTACTTACAAGACAAGATTATACAAGACTACTACAAAGACAAGACAAGAA
42	AGTAAGATAGGGCGGGCTTCACCATCAGGGCCTAGACTTATCCGCCAAGA	AGTAAGATAGGGCGGGCTTCACCATCAGAGCCTAGACTTATCCGCCAAGA	AGTAAGATAGGGCGAGCTTCACCATCAGAGCCTAGACTTATCCGCCAAGA	AGTAAGATAGAGCGAGCTTCACCATCAGAGCCTAGACTTATCCGCCAAGA	AGTAAGATAGAGCGAGCTTCACCATCAGAGCCAAGACTTATCCGCCAAGA	AGAAAGATAGAGCGAGCTTCACCATCAGAGCCAAGACTTATCCGCCAAGA	AGAAAGATAGAGCGAGCTTCACCATGAGAGCCAAGACTTATCCGCCAAGA	AGAAAGATAGAGCGAGCTTCACCATGAGAGACAAGACTTATCCGCCAAGA	AGAAAGATAGAGCGAGCTTAACCATGAGAGACAAGACTTATCCGCCAAGA	AGAAAGATAGAGCGAGCTTAACCATGAGAGACAAGACTTATCCGGCAAGA	AGAAAGATAGAGCGAGCTTAACCATGAGAGACAAGACTTATCAGGCAAGA	AGAAAGATAGAGCGAGCTTAACCATGAGAGACAAGACTTATCAAGCAAGA	AGAAAGATAGAACGAGCTTAACCATGAGAGACAAGACTTATCAAGCAAGA	AGAAAGATAGAACGAGATTAACCATGAGAGACAAGACTTATCAAGCAAGA	AGAAAGATAGAACGTGATTAACCATGAGAGACAAGACTTATCAAGCAAGA	AGAAAGATAGAACGTGATTAACCATGAAAGACAAGACTTATCAAGCAAGA	AGAAAGATAGAACGTGATTAACCATGCAAGACAAGACTTATCAAGCAAGA	AGAAAGATAGAACGTGATTAACTATGCAAGACAAGACTTATCAAGCAAGA	AGAAAGATACAACGTGATTAACTATGCAAGACAAGACTTATCAAGCAAGA	AGAAATATACAACGTGATTAACTATGCAAGACAAGACTTATCAAGCAAGA	AGAAGTATACAACGTGATTAACTATGCAAGACAAGACTTATCAAGCAAGA	AGAAGTATACAACGTGATTAACTATGCAAGACAAGACTTACCAAGCAAGA	AGAAGTATACAACGTGATTAACTATGCAAGACAAGACTTACAAAGCAAGA	AGAAGTATACAACGTGATTAACTATGCAAGACAAGAATTACAAAGCAAGA	AGAAGTACACAACGTGATTAACTATGCAAGACAAGAATTACAAAGCAAGA	AGAAGTACACAACGTGATTAACTATGCAAGACAAGAATTACAAAGCAAGA	AGAAGTACACAACGTGATTAACTATGCAAGACAAGAATTACAAAGCAAGA	AGAAGTACACAACGTGATTAACTATGCAAGACAAGAATTACAAAGCAAGA	AGAAGTACACAACGTGATTAACTATGCAAGACAAGAATTACAAAGCAAGA	AGAAGTACACAACGTGATTAACTATGCAAGACAAGAATTACAAAGCAAGA	AGAAGTACACAACGTGATTAACTATGCAAGACAAGAATTACAAAGCAAGA	AGAAGTACACAACGTGATTAACTATGCAAGACAAGAATTACAAAGCAAGA	AGAAGTACACAACGTGATTAACTATGCAAGACAAGAATTACAAAGCAAGA	AGAAGTACACAACGTGATTAACTATGCAAGACAAGAATTACAAAGCAAGA	AGAAGTACACAACGTGATTAACTATGCAAGACAAGAATTACAAAGCAAGA	AGAAGTACACAACGTGATTAACTATGCAAGACAAGAATTACAAAGCAAGA	AGAAGTACACAACGTGATTAACTATGCAAGACAAGAATTACAAAGCAAGA	AGAAGTACACAACGTGATTAACTATGCAAGACAAGAATTACAAAGCAAGA	AGAAGTACACAACGTGATTAACTATGCAAGACAAGAATTACAAAGCAAGA	AGAAGTACACAACGTGATTAACTATGCAAGACAAGAATTACAAAGCAAGA	AGAAGTACACAACGTGATTAACTATGCAAGACAAGAATTACAAAGCAAGA
43	TCACAAGCATGTCTATCGGCACGTTCGAACCCCAACCCCGATATTATGCT	TCACAAGCATGTCTATCGGCACGTTCGAACCCCAACCCCGATATTATACT	TCACAAGCATGTCTATCGGCACGTTCGAACCCCAAGCCCGATATTATACT	TCACAAGCATGTCTAACGGCACGTTCGAACCCCAAGCCCGATATTATACT	TCACAAGCATGTCTAACGGCACGTTCGAACCCCAAGACCGATATTATACT	TCACAAGCATGTCTAACGGCACGTTCGAACCCCAAGACAGATATTATACT	TCACAAGCATGTCTAACGGCACGTTCGAACCCCAAGACAGATATTCTACT	TCACAAGAATGTCTAACGGCACGTTCGAACCCCAAGACAGATATTCTACT	TCACAAGAATGTCTAAAGGCACGTTCGAACCCCAAGACAGATATTCTACT	TTACAAGAATGTCTAAAGGCACGTTCGAACCCCAAGACAGATATTCTACT	TTACAAGAATGTCTAAAGGCACGTTCGAAGCCCAAGACAGATATTCTACT	TTACAAGAATGTCTAAAGGCACGTACGAAGCCCAAGACAGATATTCTACT	TTACAAGAATGTCTAAAGGCACGTACAAAGCCCAAGACAGATATTCTACT	TTACAAGAATGTCTAAAGGCAAGTACAAAGCCCAAGACAGATATTCTACT	TTACAAGAATGTCTAAAGGCAAGTACAAAGCCCAAGACAGATATACTACT	TTACAAGAATGTCTAAAGGCAAGTACAAAGCCCAAGACATATATACTACT	TTACAAGAATGTCTAAAGGCAAGTACAAAGTCCAAGACATATATACTACT	TTACAAGAATGTCTAAAGACAAGTACAAAGTCCAAGACATATATACTACT	TTACAAGAATGACTAAAGACAAGTACAAAGTCCAAGACATATATACTACT	TTACAAGAATGACTAAAGACAAGTACAAAGTTCAAGACATATATACTACT	GTACAAGAATGACTAAAGACAAGTACAAAGTTCAAGACATATATACTACT	GTACAAGAATGACTAAATACAAGTACAAAGTTCAAGACATATATACTACT	GTACAAGAAAGACTAAATACAAGTACAAAGTTCAAGACATATATACTACT	GTACAAGCAAGACTAAATACAAGTACAAAGTTCAAGACATATATACTACT	GTACAAGCAAGACTATATACAAGTACAAAGTTCAAGACATATATACTACT	GTACAAGCAAGATTATATACAAGTACAAAGTTCAAGACATATATACTACT	GTCCAAGCAAGATTATATACAAGTACAAAGTTCAAGACATATATACTACT	GTCAAAGCAAGATTATATACAAGTACAAAGTTCAAGACATATATACTACT	GTCAAAGCAAGATTATATACAAGTACAAAGTTCAAGACATATATACTACT	GTCAAAGCAAGATTATATACAAGTACAAAGTTCAAGACATATATACTACT	GTCAAAGCAAGATTATATACAAGTACAAAGTTCAAGACATATATACTACT	GTCAAAGCAAGATTATATACAAGTACAAAGTTCAAGACATATATACTACT	GTCAAAGCAAGATTATATACAAGTACAAAGTTCAAGACATATATACTACT	GTCAAAGCAAGATTATATACAAGTACAAAGTTCAAGACATATATACTACT	GTCAAAGCAAGATTATATACAAGTACAAAGTTCAAGACATATATACTACT	GTCAAAGCAAGATTATATACAAGTACAAAGTTCAAGACATATATACTACT	GTCAAAGCAAGATTATATACAAGTACAAAGTTCAAGACATATATACTACT	GTCAAAGCAAGATTATATACAAGTACAAAGTTCAAGACATATATACTACT	GTCAAAGCAAGATTATATACAAGTACAAAGTTCAAGACATATATACTACT	GTCAAAGCAAGATTATATACAAGTACAAAGTTCAAGACATATATACTACT	GTCAAAGCAAGATTATATACAAGTACAAAGTTCAAGACATATATACTACT
44	TATTGGATCTATGGACGCCGTAATAGGCCCAAGGATGTTAGAAAGCCTGG	TATTGGATCTATGGACGCCGTAATAGGCCCAAGGATTTTAGAAAGCCTGG	TATTGGATCTATAGACGCCGTAATAGGCCCAAGGATTTTAGAAAGCCTGG	TATTGGATCTATAGACGCCGTAATAGGCCCAAGGATTTTAGAAAGCCAGG	TATTGGATCTATAGACACCGTAATAGGCCCAAGGATTTTAGAAAGCCAGG	TATTTGATCTATAGACACCGTAATAGGCCCAAGGATTTTAGAAAGCCAGG	TATTTAATCTATAGACACCGTAATAGGCCCAAGGATTTTAGAAAGCCAGG	TATTTAATCTATAGACACCGTAATAGGCCCAAGGATTTTAGAAAGCCAAG	TATTTAATCTATAGACACCGTAATAGGCCCAAGGATTTTACAAAGCCAAG	TATTTAATCTATATACACCGTAATAGGCCCAAGGATTTTACAAAGCCAAG	TATTTAATCTATATACACCGTAATAGGCCCAAAGATTTTACAAAGCCAAG	TATTTAATCTATATACACCGTAATAAGCCCAAAGATTTTACAAAGCCAAG	TATTTAATCTATATACACAGTAATAAGCCCAAAGATTTTACAAAGCCAAG	TATTTAAACTATATACACAGTAATAAGCCCAAAGATTTTACAAAGCCAAG	TATATAAACTATATACACAGTAATAAGCCCAAAGATTTTACAAAGCCAAG	TATATAAACTATATACACAGTAATAAGCCCAAAGATTTTACAAAGACAAG	TATATAAACTATATACACAGTAATAAGACCAAAGATTTTACAAAGACAAG	TATATAAACTATATACACAGAAATAAGACCAAAGATTTTACAAAGACAAG	TATATAAACTATATACAAAGAAATAAGACCAAAGATTTTACAAAGACAAG	TATATAAACTATATACAAAGAAACAAGACCAAAGATTTTACAAAGACAAG	TATATAAACTATTTACAAAGAAACAAGACCAAAGATTTTACAAAGACAAG	TATATAAACTATTTACAAAGAAACAAGACAAAAGATTTTACAAAGACAAG	TATATAAACTATTTACAAAGAAACAAGACACAAGATTTTACAAAGACAAG	TATATAAACTACTTACAAAGAAACAAGACACAAGATTTTACAAAGACAAG	TATATAAACTACTTACAAAGAAACAAGACACAAGAATTTACAAAGACAAG	TATATAAACTACTTACAAAGAAACAAGACACAAGAATTTACAAAGACAAG	TATATAAACTACTTACAAAGAAACAAGACACAAGAATTTACAAAGACAAG	TATATAAACTACTTACAAAGAAACAAGACACAAGAATTTACAAAGACAAG	TATATAAACTACTTACAAAGAAACAAGACACAAGAATTTACAAAGACAAG	TATATAAACTACTTACAAAGAAACAAGACACAAGAATTTACAAAGACAAG	TATATAAACTACTTACAAAGAAACAAGACACAAGAATTTACAAAGACAAG	TATATAAACTACTTACAAAGAAACAAGACACAAGAATTTACAAAGACAAG	TATATAAACTACTTACAAAGAAACAAGACACAAGAATTTACAAAGACAAG	TATATAAACTACTTACAAAGAAACAAGACACAAGAATTTACAAAGACAAG	TATATAAACTACTTACAAAGAAACAAGACACAAGAATTTACAAAGACAAG	TATATAAACTACTTACAAAGAAACAAGACACAAGAATTTACAAAGACAAG	TATATAAACTACTTACAAAGAAACAAGACACAAGAATTTACAAAGACAAG	TATATAAACTACTTACAAAGAAACAAGACACAAGAATTTACAAAGACAAG	TATATAAACTACTTACAAAGAAACAAGACACAAGAATTTACAAAGACAAG	TATATAAACTACTTACAAAGAAACAAGACACAAGAATTTACAAAGACAAG	TATATAAACTACTTACAAAGAAACAAGACACAAGAATTTACAAAGACAAG
45	TTGGGAAAACAATGCAGCTTTATGTCACTTGATTACTGCCTACCCTGTTC	TTGGGAAAACAATGCAGCTTTATGTCACTAGATTACTGCCTACCCTGTTC	TTGGGAAAACAATGCAGCTTTACGTCACTAGATTACTGCCTACCCTGTTC	TTGGGAAAACAATGCAGCTTTACGTCACTAGATTACTGCCTACCATGTTC	TTGGGAAAACAATGCAGCTTTACGTCACTAGATTACTGCCTACAATGTTC	TTGGGAAAACAATGCAGCTTTACGTCACAAGATTACTGCCTACAATGTTC	TTGGGAAAACAATGCAGCATTACGTCACAAGATTACTGCCTACAATGTTC	TTGGGAAAACAATGCAGCATTACGTCACAAGATTACAGCCTACAATGTTC	TTCGGAAAACAATGCAGCATTACGTCACAAGATTACAGCCTACAATGTTC	TTCGGAAAACAATGAAGCATTACGTCACAAGATTACAGCCTACAATGTTC	TTCGGAAAACAATGAAGCATTACGTCACAAGATTACAGCCTACAATGTTA	TTCGGAAAACTATGAAGCATTACGTCACAAGATTACAGCCTACAATGTTA	TTCGGAAAACTATGAAGCATTACGTCACAAGATTACAGCCCACAATGTTA	TTCGGAAAACTATGAAGAATTACGTCACAAGATTACAGCCCACAATGTTA	GTCGGAAAACTATGAAGAATTACGTCACAAGATTACAGCCCACAATGTTA	GTCGAAAAACTATGAAGAATTACGTCACAAGATTACAGCCCACAATGTTA	GTCAAAAAACTATGAAGAATTACGTCACAAGATTACAGCCCACAATGTTA	GTCAATAAACTATGAAGAATTACGTCACAAGATTACAGCCCACAATGTTA	GTCAATAAACTATGAAGAATTACGTCACAAGATTACAGCACACAATGTTA	GTCAATAAACTATGAAGAATTACGACACAAGATTACAGCACACAATGTTA	GTCAATAAACTATGAAGAATTACGACTCAAGATTACAGCACACAATGTTA	GTCAATAAACTATGAAGAATTACAACTCAAGATTACAGCACACAATGTTA	GTCAATAAACTATGAAGAATTACAAATCAAGATTACAGCACACAATGTTA	GTCAATAAACTATGAAGAATTACAAATCAAGATTACATCACACAATGTTA	GTCAATAAACTATGAAGAATTACAAATCAAGATTACATCACACAATGGTA	GTCAATAAACTATGAAGAATTACAAGTCAAGATTACATCACACAATGGTA	GTCAATAAACTATGAAGAATTACAAGACAAGATTACATCACACAATGGTA	GTCAATAAACTATGAAGAATTACAAGACAAGATTACATCAAACAATGGTA	GTCAATAAACTATGAAGAATTACAAGACAAGATTACATCAAACAATGGTA	GTCAATAAACTATGAAGAATTACAAGACAAGATTACATCAAACAATGGTA	GTCAATAAACTATGAAGAATTACAAGACAAGATTACATCAAACAATGGTA	GTCAATAAACTATGAAGAATTACAAGACAAGATTACATCAAACAATGGTA	GTCAATAAACTATGAAGAATTACAAGACAAGATTACATCAAACAATGGTA	GTCAATAAACTATGAAGAATTACAAGACAAGATTACATCAAACAATGGTA	GTCAATAAACTATGAAGAATTACAAGACAAGATTACATCAAACAATGGTA	GTCAATAAACTATGAAGAATTACAAGACAAGATTACATCAAACAATGGTA	GTCAATAAACTATGAAGAATTACAAGACAAGATTACATCAAACAATGGTA	GTCAATAAACTATGAAGAATTACAAGACAAGATTACATCAAACAATGGTA	GTCAATAAACTATGAAGAATTACAAGACAAGATTACATCAAACAATGGTA	GTCAATAAACTATGAAGAATTACAAGACAAGATTACATCAAACAATGGTA	GTCAATAAACTATGAAGAATTACAAGACAAGATTACATCAAACAATGGTA
46	TTCGTTCACAGGAGATTCGACTACAACCAGCCCCGCATTAGGCTTGTTCA	TTCGTTCACAGGAGATTCGACTACAACCAGCCCCGCATTAAGCTTGTTCA	TTCGTTCACAGGAGATTCGACTACAACCAGCCCCGCATTAAGCTTGTACA	GTCGTTCACAGGAGATTCGACTACAACCAGCCCCGCATTAAGCTTGTACA	GTCGTTCACAAGAGATTCGACTACAACCAGCCCCGCATTAAGCTTGTACA	GTCGTTCACAAGAGATTCTACTACAACCAGCCCCGCATTAAGCTTGTACA	GTCGTTCACAAGAGATTCTACTACAAACAGCCCCGCATTAAGCTTGTACA	GTCGTTCACAAGAGATTCTACTACAAACAGCCCCGCATTAAGATTGTACA	GTCGTTCACAAGAGATTCTACTACAAACAGCCCCGCATTAAGATTATACA	GTCGTACACAAGAGATTCTACTACAAACAGCCCCGCATTAAGATTATACA	GTCCTACACAAGAGATTCTACTACAAACAGCCCCGCATTAAGATTATACA	GTCCTACACAAGAGATACTACTACAAACAGCCCCGCATTAAGATTATACA	GTCCTACACAAGAAATACTACTACAAACAGCCCCGCATTAAGATTATACA	GTCCTACACAAGAAATACTACTACAAACAGACCCGCATTAAGATTATACA	GTCCTACACAAGAAATACTACTACAAACAGACCCGCGTTAAGATTATACA	GTCCTACACAAGAAATACTACTACAAACAGACTCGCGTTAAGATTATACA	GTCCTACACAAGAAATACTACTACAAATAGACTCGCGTTAAGATTATACA	GTCCTACACAAGAAATATTACTACAAATAGACTCGCGTTAAGATTATACA	GTCCTACACAAGAAATATTACTACAAATAGACTTGCGTTAAGATTATACA	GTCCTACACAAGAAATATTACTACAAATAGAATTGCGTTAAGATTATACA	GTCCTACACAAGAAATATTACTACAAATAGAATTACGTTAAGATTATACA	GTCCTACACAAGAAATATTACTACAAATAGAATTACGATAAGATTATACA	GTCCTACACAAGAAATATTACTACAAATAAAATTACGATAAGATTATACA	GTCCTACACAAGAAATATTACTACAAATAAGATTACGATAAGATTATACA	GTCCTACACAAGAAATATTACTACAAATAAGATTACGACAAGATTATACA	GTCCTACACAAGAAATATTACTACAAATAAGATTACTACAAGATTATACA	GTCCTACACAAGAAATATTACTACAAATAAGATTACTACAAGACTATACA	GTCCTACACAAGAAATATTACTACAAATAAGACTACTACAAGACTATACA	GTCCTACACAAGAAATATTACTACAAATAAGACTACTACAAGACTATACA	GTCCTACACAAGAAATATTACTACAAATAAGACTACTACAAGACTATACA	GTCCTACACAAGAAATATTACTACAAATAAGACTACTACAAGACTATACA	GTCCTACACAAGAAATATTACTACAAATAAGACTACTACAAGACTATACA	GTCCTACACAAGAAATATTACTACAAATAAGACTACTACAAGACTATACA	GTCCTACACAAGAAATATTACTACAAATAAGACTACTACAAGACTATACA	GTCCTACACAAGAAATATTACTACAAATAAGACTACTACAAGACTATACA	GTCCTACACAAGAAATATTACTACAAATAAGACTACTACAAGACTATACA	GTCCTACACAAGAAATATTACTACAAATAAGACTACTACAAGACTATACA	GTCCTACACAAGAAATATTACTACAAATAAGACTACTACAAGACTATACA	GTCCTACACAAGAAATATTACTACAAATAAGACTACTACAAGACTATACA	GTCCTACACAAGAAATATTACTACAAATAAGACTACTACAAGACTATACA	GTCCTACACAAGAAATATTACTACAAATAAGACTACTACAAGACTATACA
47	TGATTCCAACGCGTGCTACGACGGATCTCCAAAATAAAAGTCACCTCAAG	AGATTCCAACGCGTGCTACGACGGATCTCCAAAATAAAAGTCACCTCAAG	AGATTCCAACGCGTGCTACGACGGATCTACAAAATAAAAGTCACCTCAAG	AGATTCCAACGAGTGCTACGACGGATCTACAAAATAAAAGTCACCTCAAG	AGATTACAACGAGTGCTACGACGGATCTACAAAATAAAAGTCACCTCAAG	AGATTACAACGAGTGCTACGACGAATCTACAAAATAAAAGTCACCTCAAG	AGATTACAACAAGTGCTACGACGAATCTACAAAATAAAAGTCACCTCAAG	AGATTACTACAAGTGCTACGACGAATCTACAAAATAAAAGTCACCTCAAG	AGATTACTACAAGTGCTACGACGAATCTACAAAATAAAAGTCAACTCAAG	AGATTACTACAAGTGCTACGACGAATCTACAAAATAAAAGTCAAGTCAAG	AGATTACTACAAGTGCTACGACGAATCTACAAAATAAAAGTCAAGACAAG	AGATTACTACAAGTGCTACGACGAATCTACAAAATATAAGTCAAGACAAG	AGATTACTACAAGTGCTACGAAGAATCTACAAAATATAAGTCAAGACAAG	AGATTACTACAAGTGCTACAAAGAATCTACAAAATATAAGTCAAGACAAG	AGATTACTACAAGTGCTACAAAGAAACTACAAAATATAAGTCAAGACAAG	AGATTACTACAAGTGCTACAAAGAAACTACAAAATATAAGACAAGACAAG	AGATTACTACAAGTGCTACAAAGAAACTACAAACTATAAGACAAGACAAG	AGATTACTACAAGTACTACAAAGAAACTACAAACTATAAGACAAGACAAG	AGATTACTACAAATACTACAAAGAAACTACAAACTATAAGACAAGACAAG	AGATTACTACAAATACTACAAAGATACTACAAACTATAAGACAAGACAAG	AGATTACTACAAATACTACAAAGATACTACAAACTACAAGACAAGACAAG	AGATTACTACAAATACTACAAAGATACTACAAAGTACAAGACAAGACAAG	AGATTACTACAAATACTACAAAGATACTACAAAGTACAAGACAAGACAAG	AGATTACTACAAATACTACAAAGATACTACAAAGTACAAGACAAGACAAG	AGATTACTACAAATACTACAAAGATACTACAAAGTACAAGACAAGACAAG	AGATTACTACAAATACTACAAAGATACTACAAAGTACAAGACAAGACAAG	AGATTACTACAAATACTACAAAGATACTACAAAGTACAAGACAAGACAAG	AGATTACTACAAATACTACAAAGATACTACAAAGTACAAGACAAGACAAG	AGATTACTACAAATACTACAAAGATACTACAAAGTACAAGACAAGACAAG	AGATTACTACAAATACTACAAAGATACTACAAAGTACAAGACAAGACAAG	AGATTACTACAAATACTACAAAGATACTACAAAGTACAAGACAAGACAAG	AGATTACTACAAATACTACAAAGATACTACAAAGTACAAGACAAGACAAG	AGATTACTACAAATACTACAAAGATACTACAAAGTACAAGACAAGACAAG	AGATTACTACAAATACTACAAAGATACTACAAAGTACAAGACAAGACAAG	AGATTACTACAAATACTACAAAGATACTACAAAGTACAAGACAAGACAAG	AGATTACTACAAATACTACAAAGATACTACAAAGTACAAGACAAGACAAG	AGATTACTACAAATACTACAAAGATACTACAAAGTACAAGACAAGACAAG	AGATTACTACAAATACTACAAAGATACTACAAAGTACAAGACAAGACAAG	AGATTACTACAAATACTACAAAGATACTACAAAGTACAAGACAAGACAAG	AGATTACTACAAATACTACAAAGATACTACAAAGTACAAGACAAGACAAG	AGATTACTACAAATACTACAAAGATACTACAAAGTACAAGACAAGACAAG
48	GAAAGGAGTATGGAATATTTGACAATCGAATAGCGCCAATGCAATCATCG	GAAAGGAGTATAGAATATTTGACAATCGAATAGCGCCAATGCAATCATCG	GAAAGGAGTATAGAATATTTAACAATCGAATAGCGCCAATGCAATCATCG	GAAAGGAGTATAGACTATTTAACAATCGAATAGCGCCAATGCAATCATCG	GAAAGGAGTATAGACTATTTAACAATCGAATAGCGCCAATGCAATCAACG	GAAAGGAGTATAGACTATTTAACAATCGAATAGCGCCAATGCAATCTACG	AAAAGGAGTATAGACTATTTAACAATCGAATAGCGCCAATGCAATCTACG	AGAAGGAGTATAGACTATTTAACAATCGAATAGCGCCAATGCAATCTACG	AGAAGGACTATAGACTATTTAACAATCGAATAGCGCCAATGCAATCTACG	AGAAGGACTATATACTATTTAACAATCGAATAGCGCCAATGCAATCTACG	AGAAGGACTATATACTATTTAACAATCGAATAGCGACAATGCAATCTACG	AGAAGGACTATATACTATTTAACAATCGAATAGCGACAAAGCAATCTACG	AGAAGGACTATATACTATTTAACAATCGAATAGCTACAAAGCAATCTACG	AGAAGGACTATATACTATTTAACAATCGAATAGCTACAAAGCAAACTACG	AGAAAGACTATATACTATTTAACAATCGAATAGCTACAAAGCAAACTACG	AGAAAGACTATATACTATTTAACAATCAAATAGCTACAAAGCAAACTACG	AGAAAGACTATATACTATTTAACAATCAAGTAGCTACAAAGCAAACTACG	AGAAAGACTATATACTATTTAACAATCAAGTAACTACAAAGCAAACTACG	AGAAAGACTATATACTATTTAACAATCAAGAAACTACAAAGCAAACTACG	AGAAAGACTATATACTATTTAAGAATCAAGAAACTACAAAGCAAACTACG	AGAAAGACTATATACTATATAAGAATCAAGAAACTACAAAGCAAACTACG	AGAAAGACTATATACTATACAAGAATCAAGAAACTACAAAGCAAACTACG	AGAAAGACTATTTACTATACAAGAATCAAGAAACTACAAAGCAAACTACG	AGAAAAACTATTTACTATACAAGAATCAAGAAACTACAAAGCAAACTACG	AGACAAACTATTTACTATACAAGAATCAAGAAACTACAAAGCAAACTACG	AGACAAACTATTTACTATACAAGAATCAAGAAACTACAAAGCATACTACG	AGACAAACTATTTACTATACAAGAATCAAGAAACTACAAAGCCTACTACG	AGACAAACTATTTACTATACAAGAATCAAGAAACTACAAAGACTACTACG	AGACAAACTATTTACTATACAAGAATCAAGAAACTACAAAGACTACTAAG	AGACAAACTATTTACTATACAAGAATCAAGAAACTACAAAGACTACAAAG	AGACAAACTATTTACTATACAAGAATCAAGAAACTACAAAGACTACAAAG	AGACAAACTATTTACTATACAAGAATCAAGAAACTACAAAGACTACAAAG	AGACAAACTATTTACTATACAAGAATCAAGAAACTACAAAGACTACAAAG	AGACAAACTATTTACTATACAAGAATCAAGAAACTACAAAGACTACAAAG	AGACAAACTATTTACTATACAAGAATCAAGAAACTACAAAGACTACAAAG	AGACAAACTATTTACTATACAAGAATCAAGAAACTACAAAGACTACAAAG	AGACAAACTATTTACTATACAAGAATCAAGAAACTACAAAGACTACAAAG	AGACAAACTATTTACTATACAAGAATCAAGAAACTACAAAGACTACAAAG	AGACAAACTATTTACTATACAAGAATCAAGAAACTACAAAGACTACAAAG	AGACAAACTATTTACTATACAAGAATCAAGAAACTACAAAGACTACAAAG	AGACAAACTATTTACTATACAAGAATCAAGAAACTACAAAGACTACAAAG
49	AACACTTGTTGTTGCAGGTCTAGTAGATAGCCGCTTATTCATACATGAGA	AACACTTGTTGTTGCAGGTCTAGTAGATAGCCGCTTATTCAAACATGAGA	AACACTTGTTGTTGCAGGTCTAGTAGATAGCCGATTATTCAAACATGAGA	AACACTTGTTGTTGCAGGTCTAGTATATAGCCGATTATTCAAACATGAGA	AACACTTGTTGTTGCAGGTCTAGTATATAGACGATTATTCAAACATGAGA	AACACTTGTTGTTGCAGGTCTACTATATAGACGATTATTCAAACATGAGA	AACACTTGTTGTTGCAGGTCTACTATATAAACGATTATTCAAACATGAGA	AACACTTGTTGTTACAGGTCTACTATATAAACGATTATTCAAACATGAGA	AAGACTTGTTGTTACAGGTCTACTATATAAACGATTATTCAAACATGAGA	AAGACTTATTGTTACAGGTCTACTATATAAACGATTATTCAAACATGAGA	AAGACTTATTGTTACAGATCTACTATATAAACGATTATTCAAACATGAGA	AAGACTTATAGTTACAGATCTACTATATAAACGATTATTCAAACATGAGA	AAGACTTACAGTTACAGATCTACTATATAAACGATTATTCAAACATGAGA	AAGACTTACAGTTACAGATCTACTATATAAACGATTATACAAACATGAGA	AAGACTTACAGTTACAGATCTACTATATAAACTATTATACAAACATGAGA	AAGACTTACAGTTACAGATCTACTATATAAACTATTATACAAAGATGAGA	AAGACTTACAGTTACAGATCTACTATATAAACTATTATACAAAGATAAGA	AAGACTTACAGTTACAGATCTACTATATAAACTATTATACAAAGACAAGA	AAGACTTACAGTTACAAATCTACTATATAAACTATTATACAAAGACAAGA	AAGACTTACAGTTACAAATCTACTATATAAACTATTTTACAAAGACAAGA	AAGATTTACAGTTACAAATCTACTATATAAACTATTTTACAAAGACAAGA	AAGATTTACAGTTACAAATCAACTATATAAACTATTTTACAAAGACAAGA	AAGATTTACAGTTACAAATAAACTATATAAACTATTTTACAAAGACAAGA	AAGATTTACAGTTACAAAGAAACTATATAAACTATTTTACAAAGACAAGA	AAGATTTACAGATACAAAGAAACTATATAAACTATTTTACAAAGACAAGA	AAGATTTACAGATACAAAGAAACTATATAAACTATATTACAAAGACAAGA	AAGATTTACAGATACAAAGAAACTATATAAACTATACTACAAAGACAAGA	AAGATTTACAGATACAAAGAAACTATATAAACGATACTACAAAGACAAGA	AAGATTTACAGATATAAAGAAACTATATAAACGATACTACAAAGACAAGA	AAGATATACAGATATAAAGAAACTATATAAACGATACTACAAAGACAAGA	AAGATATACAGATATAAAGAAACTATATAAACGATACTACAAAGACAAGA	AAGATATACAGATATAAAGAAACTATATAAACGATACTACAAAGACAAGA	AAGATATACAGATATAAAGAAACTATATAAACGATACTACAAAGACAAGA	AAGATATACAGATATAAAGAAACTATATAAACGATACTACAAAGACAAGA	AAGATATACAGATATAAAGAAACTATATAAACGATACTACAAAGACAAGA	AAGATATACAGATATAAAGAAACTATATAAACGATACTACAAAGACAAGA	AAGATATACAGATATAAAGAAACTATATAAACGATACTACAAAGACAAGA	AAGATATACAGATATAAAGAAACTATATAAACGATACTACAAAGACAAGA	AAGATATACAGATATAAAGAAACTATATAAACGATACTACAAAGACAAGA	AAGATATACAGATATAAAGAAACTATATAAACGATACTACAAAGACAAGA	AAGATATACAGATATAAAGAAACTATATAAACGATACTACAAAGACAAGA
50	GTTGCAGACGCAGAGATGACACTATAGAAACATAAACGAACACGTAAACA	GTTGCAGACGCAGAGATTACACTATAGAAACATAAACGAACACGTAAACA	GTTGCAGACGCAGAGATTACACTATATAAACATAAACGAACACGTAAACA	GTTGCAGACGCAGAGATTACACTATATAAATATAAACGAACACGTAAACA	GTTACAGACGCAGAGATTACACTATATAAATATAAACGAACACGTAAACA	GTTACAGACGCAGAGATTACACTATATAAATATAAACGAACAAGTAAACA	GTTACAGACGCAGAGATTACACTATATAAATATAAACGAACAAGTATACA	GTTACAGACGCAAAGATTACACTATATAAATATAAACGAACAAGTATACA	GTTACAGACGCAAAGATTACACTATATAAATATAAACAAACAAGTATACA	GTTACAGACGCAAAGATTACACTATATAAATATATACAAACAAGTATACA	GTTACAGACGCAAAGATTACACTATATAAATATATACAAACAAGTATAAA	GTTACAGACGCAAAGATTACACTATATAAATATATACAAACAAGTATAAG	GTTACAGACGCAAAGATTACACTATATAAATATATACAAACAAGAATAAG	GTTACAGACGCAAAGATTACACTATATAAATATATACAAACAAGATTAAG	GTTACAGACGCAAAGATTAAACTATATAAATATATACAAACAAGATTAAG	GTTACAGACACAAAGATTAAACTATATAAATATATACAAACAAGATTAAG	GTTACAGACACTAAGATTAAACTATATAAATATATACAAACAAGATTAAG	GTTACAGAGACTAAGATTAAACTATATAAATATATACAAACAAGATTAAG	GTTACAAAGACTAAGATTAAACTATATAAATATATACAAACAAGATTAAG	GTTACAAAGACTACGATTAAACTATATAAATATATACAAACAAGATTAAG	GTTACAAAGACTACTATTAAACTATATAAATATATACAAACAAGATTAAG	GTTACAAAGACTACTATTAAACTATATAAATATATACAAGCAAGATTAAG	GTTACAAAGACTACTATTAAACTATATAAATATATACAAGCAAGATTAAG	GTTACAAAGACTACTATTAAACTATATAAATATATACAAGCAAGATTAAG	GTTACAAAGACTACTATTAAACTATATAAATATATACAAGCAAGATTAAG	GTTACAAAGACTACTATTAAACTATATAAATATATACAAGCAAGATTAAG	GTTACAAAGACTACTATTAAACTATATAAATATATACAAGCAAGATTAAG	GTTACAAAGACTACTATTAAACTATATAAATATATACAAGCAAGATTAAG	GTTACAAAGACTACTATTAAACTATATAAATATATACAAGCAAGATTAAG	GTTACAAAGACTACTATTAAACTATATAAATATATACAAGCAAGATTAAG	GTTACAAAGACTACTATTAAACTATATAAATATATACAAGCAAGATTAAG	GTTACAAAGACTACTATTAAACTATATAAATATATACAAGCAAGATTAAG	GTTACAAAGACTACTATTAAACTATATAAATATATACAAGCAAGATTAAG	GTTACAAAGACTACTATTAAACTATATAAATATATACAAGCAAGATTAAG	GTTACAAAGACTACTATTAAACTATATAAATATATACAAGCAAGATTAAG	GTTACAAAGACTACTATTAAACTATATAAATATATACAAGCAAGATTAAG	GTTACAAAGACTACTATTAAACTATATAAATATATACAAGCAAGATTAAG	GTTACAAAGACTACTATTAAACTATATAAATATATACAAGCAAGATTAAG	GTTACAAAGACTACTATTAAACTATATAAATATATACAAGCAAGATTAAG	GTTACAAAGACTACTATTAAACTATATAAATATATACAAGCAAGATTAAG	GTTACAAAGACTACTATTAAACTATATAAATATATACAAGCAAGATTAAG
51	AGCTAAACCTAAGGTCGTCAGGACGAATCAACTTCCCCCATTAGCGTAGT	AGCTAAACCTAAGGTCGTCAAGACGAATCAACTTCCCCCATTAGCGTAGT	AGATAAACCTAAGGTCGTCAAGACGAATCAACTTCCCCCATTAGCGTAGT	AGATAAACCTAAGGTCGTCAAGACGAATCAACTTCCCCCATTAGCCTAGT	AGATAAACCTAAGGTCGTCAAGACGAATCAAGTTCCCCCATTAGCCTAGT	AGATAAACCTAAGGTCGTCAAGACGAATCAAGATCCCCCATTAGCCTAGT	AGATAAACCTAAGATCGTCAAGACGAATCAAGATCCCCCATTAGCCTAGT	AGATAAACCTAAGATCGTCAAGAAGAATCAAGATCCCCCATTAGCCTAGT	AGATAAAGCTAAGATCGTCAAGAAGAATCAAGATCCCCCATTAGCCTAGT	AGATAAAGCTAAGATCGTCAAGAAGAATCAAGATCCCCCATTAGACTAGT	AGATAAAGCTAAGATCGTCAAGAAGAATCAAGATCCCCCATTAGACTACT	AGATAAAGCTAAGATCGTCAAGAAGAATCAAGATCCACCATTAGACTACT	AGATAAAGCTAAGATCGTCAAGAAGAATCAAGATCCACTATTAGACTACT	AGATAAAGCTAAGATCGTCAAGAAGAATCAAGATACACTATTAGACTACT	AGATAAAGCTAAGATCGTCAAGAAGAATCAAGATAAACTATTAGACTACT	AGATAAAGCTAAGATCGTCAAGAAGAATCAAGATAAACTATTAAACTACT	AGATAAAGCTAAGATCGTCAAGAAGAATCAAGATAAACTATTTAACTACT	AGATAAAGCTAAGATCGTCAAGAAGAATCAAGATATACTATTTAACTACT	AGATAAAGCTAAGACCGTCAAGAAGAATCAAGATATACTATTTAACTACT	AGATAAAGCAAAGACCGTCAAGAAGAATCAAGATATACTATTTAACTACT	AGATAAAGCAAAAACCGTCAAGAAGAATCAAGATATACTATTTAACTACT	AGATAAAGCAAGAACCGTCAAGAAGAATCAAGATATACTATTTAACTACT	AGATAAAGCAAGAACCGTCAAGAAGAATCAAGATATACTATTTAACTACT	AGATAAAGCAAGAACCGTCAAGAAGAATCAAGATATACTATTTAACTACT	AGATAAAGCAAGAACCGTCAAGAAGAATCAAGATATACTATTTAACTACT	AGATAAAGCAAGAACCGTCAAGAAGAATCAAGATATACTATTTAACTACT	AGATAAAGCAAGAACCGTCAAGAAGAATCAAGATATACTATTTAACTACT	AGATAAAGCAAGAACCGTCAAGAAGAATCAAGATATACTATTTAACTACT	AGATAAAGCAAGAACCGTCAAGAAGAATCAAGATATACTATTTAACTACT	AGATAAAGCAAGAACCGTCAAGAAGAATCAAGATATACTATTTAACTACT	AGATAAAGCAAGAACCGTCAAGAAGAATCAAGATATACTATTTAACTACT	AGATAAAGCAAGAACCGTCAAGAAGAATCAAGATATACTATTTAACTACT	AGATAAAGCAAGAACCGTCAAGAAGAATCAAGATATACTATTTAACTACT	AGATAAAGCAAGAACCGTCAAGAAGAATCAAGATATACTATTTAACTACT	AGATAAAGCAAGAACCGTCAAGAAGAATCAAGATATACTATTTAACTACT	AGATAAAGCAAGAACCGTCAAGAAGAATCAAGATATACTATTTAACTACT	AGATAAAGCAAGAACCGTCAAGAAGAATCAAGATATACTATTTAACTACT	AGATAAAGCAAGAACCGTCAAGAAGAATCAAGATATACTATTTAACTACT	AGATAAAGCAAGAACCGTCAAGAAGAATCAAGATATACTATTTAACTACT	AGATAAAGCAAGAACCGTCAAGAAGAATCAAGATATACTATTTAACTACT	AGATAAAGCAAGAACCGTCAAGAAGAATCAAGATATACTATTTAACTACT
52	CGTTCGGCAGATGCCAACTGAACGCCATGCTGTGGGATCTCAGACCTTAG	CGTTCGGCAGATGCCAACTGAACGCCATGCTGTGGGATCTCAGACCTAAG	CGTTCGGCAGATACCAACTGAACGCCATGCTGTGGGATCTCAGACCTAAG	CGTTCGGCAGATACCAACTGAACGCCATGCTGTGGGATCTAAGACCTAAG	CGTTCGGCAGATACCAACTGAACGCCATGCTGTGGGATCTAAGAACTAAG	CGTTCGGCAGATACCAACTGAACGACATGCTGTGGGATCTAAGAACTAAG	CGTTCGGCAGATACTAACTGAACGACATGCTGTGGGATCTAAGAACTAAG	CGTTCGGCAGATACTAACTAAACGACATGCTGTGGGATCTAAGAACTAAG	AGTTCGGCAGATACTAACTAAACGACATGCTGTGGGATCTAAGAACTAAG	AGTTAGGCAGATACTAACTAAACGACATGCTGTGGGATCTAAGAACTAAG	AGTTAGGCAGATACTAACTAAACGACATGTTGTGGGATCTAAGAACTAAG	AGTTAGGCAGATACTAACTAAACGACATGTTGTGGGATCCAAGAACTAAG	AGTTAGGCAGATACTAACTAAACGACATGTTGTGTGATCCAAGAACTAAG	AGTTAGGCAGATACTAACTAAACGACATGTTGTGTGATACAAGAACTAAG	AGTTAGGCAGATACTAACTAAACGACATGTTTTGTGATACAAGAACTAAG	AGTTAGGCAGATACTAACTAAACTACATGTTTTGTGATACAAGAACTAAG	AGTTAGGCAGATACTAACTAAACTACATATTTTGTGATACAAGAACTAAG	AGTTAGGCAGATACTAAGTAAACTACATATTTTGTGATACAAGAACTAAG	AGTTAGGCAGATACTAAGTAAACTACATATTTAGTGATACAAGAACTAAG	AGTTAGGCAGATACTAAGTAAACTATATATTTAGTGATACAAGAACTAAG	AGTTAGGCAGATACTAAATAAACTATATATTTAGTGATACAAGAACTAAG	AGTTAGGCAGATACTAAATAAACTATATATTTAGTGAGACAAGAACTAAG	AGTTAGGCAGATACTAAATAAACTATATATTTAGTAAGACAAGAACTAAG	AGATAGGCAGATACTAAATAAACTATATATTTAGTAAGACAAGAACTAAG	AGAAAGGCAGATACTAAATAAACTATATATTTAGTAAGACAAGAACTAAG	AGAAAGGCAGAAACTAAATAAACTATATATTTAGTAAGACAAGAACTAAG	AGAAAGACAGAAACTAAATAAACTATATATTTAGTAAGACAAGAACTAAG	AGAAATACAGAAACTAAATAAACTATATATTTAGTAAGACAAGAACTAAG	AGAATTACAGAAACTAAATAAACTATATATTTAGTAAGACAAGAACTAAG	AGAATTACAGAAACTATATAAACTATATATTTAGTAAGACAAGAACTAAG	AGAATTACAGAAACTATATAAACTATATATTTAGCAAGACAAGAACTAAG	AGAATTACAGAAGCTATATAAACTATATATTTAGCAAGACAAGAACTAAG	AGAATTACAGAAGCTATATAAACTATATATTTAGCAAGACAAGAACTAAG	AGAATTACAGAAGCTATATAAACTATATATTTAGCAAGACAAGAACTAAG	AGAATTACAGAAGCTATATAAACTATATATTTAGCAAGACAAGAACTAAG	AGAATTACAGAAGCTATATAAACTATATATTTAGCAAGACAAGAACTAAG	AGAATTACAGAAGCTATATAAACTATATATTTAGCAAGACAAGAACTAAG	AGAATTACAGAAGCTATATAAACTATATATTTAGCAAGACAAGAACTAAG	AGAATTACAGAAGCTATATAAACTATATATTTAGCAAGACAAGAACTAAG	AGAATTACAGAAGCTATATAAACTATATATTTAGCAAGACAAGAACTAAG	AGAATTACAGAAGCTATATAAACTATATATTTAGCAAGACAAGAACTAAG
53	GCCAGTATCAATGATGACGTACTTCGGTGAGCCGACGTACTAAGTAGGGG	GCCAGTATCAATGATTACGTACTTCGGTGAGCCGACGTACTAAGTAGGGG	GCCAGTATCAATTATTACGTACTTCGGTGAGCCGACGTACTAAGTAGGGG	GCCAGTATCAATTATTACGTACTTCGGTGAGCCGACGTACTAAGTAGGAG	GCCAGTATCAATTATTACGTACTTCGGTGAGCCGACGTACTAAGTACGAG	GCCAGTATCAATTATTACGTACTTCGGTGAGCCGACGTACTAAGTACAAG	GCCAGTATCAATTATTACGTACTTCGGTGAGACGACGTACTAAGTACAAG	GCCAGTATCAATTATTACGTACTTCGGTGAGACTACGTACTAAGTACAAG	GCCAGTATCAATTATTACGTACTTCGGTGAGACTACATACTAAGTACAAG	GCCAGTATCAATTATTACGTACTTCGGTAAGACTACATACTAAGTACAAG	GCCAGTATCAATTATTACGTACTTCGATAAGACTACATACTAAGTACAAG	GCCAGTATCAATTATTACGTACTTAGATAAGACTACATACTAAGTACAAG	GCCAGTATCAATTATTACGTACTTATATAAGACTACATACTAAGTACAAG	GCCAGTATCAATTATTACGTACTTATATAAAACTACATACTAAGTACAAG	GCCAGTATCAATTATTACATACTTATATAAAACTACATACTAAGTACAAG	GTCAGTATCAATTATTACATACTTATATAAAACTACATACTAAGTACAAG	GTCAGTATCAGTTATTACATACTTATATAAAACTACATACTAAGTACAAG	GTCAGTATCAGTTATTACATACATATATAAAACTACATACTAAGTACAAG	GTCAGTATCAGTTATTACATACATATATAAAACTATATACTAAGTACAAG	GTCAGTATCAGTTATTACATACATATATAAAACTATATACTAAGTACAAG	GTCAGTATCAGTTATTACATACATATATAAAACTATATACTAAGTACAAG	GTCAGTATCAGTTATTACATACATATATAAAACTATATACTAAGTACAAG	GTCAGTATCAGTTATTACATACATATATAAAACTATATACTAAGTACAAG	GTCAGTATCAGTTATTACATACATATATAAAACTATATACTAAGTACAAG	GTCAGTATCAGTTATTACATACATATATAAAACTATATACTAAGTACAAG	GTCAGTATCAGTTATTACATACATATATAAAACTATATACTAAGTACAAG	GTCAGTATCAGTTATTACATACATATATAAAACTATATACTAAGTACAAG	GTCAGTATCAGTTATTACATACATATATAAAACTATATACTAAGTACAAG	GTCAGTATCAGTTATTACATACATATATAAAACTATATACTAAGTACAAG	GTCAGTATCAGTTATTACATACATATATAAAACTATATACTAAGTACAAG	GTCAGTATCAGTTATTACATACATATATAAAACTATATACTAAGTACAAG	GTCAGTATCAGTTATTACATACATATATAAAACTATATACTAAGTACAAG	GTCAGTATCAGTTATTACATACATATATAAAACTATATACTAAGTACAAG	GTCAGTATCAGTTATTACATACATATATAAAACTATATACTAAGTACAAG	GTCAGTATCAGTTATTACATACATATATAAAACTATATACTAAGTACAAG	GTCAGTATCAGTTATTACATACATATATAAAACTATATACTAAGTACAAG	GTCAGTATCAGTTATTACATACATATATAAAACTATATACTAAGTACAAG	GTCAGTATCAGTTATTACATACATATATAAAACTATATACTAAGTACAAG	GTCAGTATCAGTTATTACATACATATATAAAACTATATACTAAGTACAAG	GTCAGTATCAGTTATTACATACATATATAAAACTATATACTAAGTACAAG	GTCAGTATCAGTTATTACATACATATATAAAACTATATACTAAGTACAAG
54	TGTTTACGCAACTTCGATGTTACCATCCGGAAGGGCGTGTCCCGTACTAC	TGTTTACGCAACTTCGAAGTTACCATCCGGAAGGGCGTGTCCCGTACTAC	TGTTTACGCAACTTCGAAGTTACCATCCGGAAGAGCGTGTCCCGTACTAC	AGTTTACGCAACTTCGAAGTTACCATCCGGAAGAGCGTGTCCCGTACTAC	AGATTACGCAACTTCGAAGTTACCATCCGGAAGAGCGTGTCCCGTACTAC	AGATTACGCAACTTCGAAGTTACCATCCGGAAGAGCGTGTCCCGTACAAC	AGATTACGCAACTTCGAAGTTACCATCCGGAAGAGCGTGTCCCGTACAAG	AGATTACGCAACTACGAAGTTACCATCCGGAAGAGCGTGTCCCGTACAAG	AGATTACGAAACTACGAAGTTACCATCCGGAAGAGCGTGTCCCGTACAAG	AGATTACGAAACTACAAAGTTACCATCCGGAAGAGCGTGTCCCGTACAAG	AGATTACGAAACTACAAAGTTACAATCCGGAAGAGCGTGTCCCGTACAAG	AGATTACGAAACTACAAAGTTACAATCCAGAAGAGCGTGTCCCGTACAAG	AGATTACGAAACTACAAAGTTACAATCAAGAAGAGCGTGTCCCGTACAAG	AGATTACGAAACTACAAAGTTACAAACAAGAAGAGCGTGTCCCGTACAAG	AGATTACGAAACTACAAAGTTACATACAAGAAGAGCGTGTCCCGTACAAG	AGATTACGAAACTACAAAGTTACATACAAGAAGAGCGTGTCCAGTACAAG	AGATTACGAAACTACAAAGTTACATACAAGAAGAGCGTGTCAAGTACAAG	AGATTACGAAACTACAAAGTTACATACAAGAAGAGTGTGTCAAGTACAAG	AGATTACGAAACTACAAAGTTACATACAAGAAGAGTGTTTCAAGTACAAG	AGATTACGAAACTACAAAGTTACATACAAGAAGAGTGTTACAAGTACAAG	AGATTACGAAACTACAAAGTTACATACAAGAAGAGTATTACAAGTACAAG	AGATTACGAAACTACAAAGTTACATACAAGAAGAGTACTACAAGTACAAG	AGATTACGAAACTACAAAGTTATATACAAGAAGAGTACTACAAGTACAAG	AGATTACGAAACTACAAAGTTATATACAAGAAAAGTACTACAAGTACAAG	AGATTACGAAACTACAAAGTTATATACAAGAAAAGTACTACAAATACAAG	AGATTACGAAACTACAAAGTTATATACAAGAAAAGTACTACAAAGACAAG	AGATTACAAAACTACAAAGTTATATACAAGAAAAGTACTACAAAGACAAG	AGATTACAAAAATACAAAGTTATATACAAGAAAAGTACTACAAAGACAAG	AGATTACAAAAATACAAAGTTATATACAAGAAAAGTACTACAAAGACAAG	AGATTACAAAAATACAAAGTTATATACAAGAAAAGTACTACAAAGACAAG	AGATTACAAAAATACAAAGTTATATACAAGAAAAGTACTACAAAGACAAG	AGATTACAAAAATACAAAGTTATATACAAGAAAAGTACTACAAAGACAAG	AGATTACAAAAATACAAAGTTATATACAAGAAAAGTACTACAAAGACAAG	AGATTACAAAAATACAAAGTTATATACAAGAAAAGTACTACAAAGACAAG	AGATTACAAAAATACAAAGTTATATACAAGAAAAGTACTACAAAGACAAG	AGATTACAAAAATACAAAGTTATATACAAGAAAAGTACTACAAAGACAAG	AGATTACAAAAATACAAAGTTATATACAAGAAAAGTACTACAAAGACAAG	AGATTACAAAAATACAAAGTTATATACAAGAAAAGTACTACAAAGACAAG	AGATTACAAAAATACAAAGTTATATACAAGAAAAGTACTACAAAGACAAG	AGATTACAAAAATACAAAGTTATATACAAGAAAAGTACTACAAAGACAAG	AGATTACAAAAATACAAAGTTATATACAAGAAAAGTACTACAAAGACAAG
55	TAACCGATGTCATATCCATCAGGTAGGGGCAACAATCAACTTTCGCCAGA	TAACCGAAGTCATATCCATCAGGTAGGGGCAACAATCAACTTTCGCCAGA	TAACCGAAGTCATATCCATCAGGTAGGGGCAACAATCAACTTTCGCAAGA	TAACCGAAGTCATATCCATCAGGTAGGAGCAACAATCAACTTTCGCAAGA	TAACCGAAGTCATATCCATCAGGTAGGAGCAAGAATCAACTTTCGCAAGA	TAACCGAAGTCATATCCATCAAGTAGGAGCAAGAATCAACTTTCGCAAGA	TAACCGAAGTCATATCCATCAAGAAGGAGCAAGAATCAACTTTCGCAAGA	TAACCGAAGTCATATCCATCAAGAAGAAGCAAGAATCAACTTTCGCAAGA	TAACCGAAGTCATGTCCATCAAGAAGAAGCAAGAATCAACTTTCGCAAGA	TAACAGAAGTCATGTCCATCAAGAAGAAGCAAGAATCAACTTTCGCAAGA	TAACAGAAGACATGTCCATCAAGAAGAAGCAAGAATCAACTTTCGCAAGA	TAACAGAAGACATGTCCATCAAGAAGAAGCAAGAATCAACTTACGCAAGA	TAACAGAAGACATGTCCATCAAGAAGAAGCAAGAATCAACTAACGCAAGA	TAACAGAAGACATGTCCATCAAGAAGAAGCAAGAATCAAGTAACGCAAGA	TAACAGAAGACATGTCAATCAAGAAGAAGCAAGAATCAAGTAACGCAAGA	TTACAGAAGACATGTCAATCAAGAAGAAGCAAGAATCAAGTAACGCAAGA	TTACACAAGACATGTCAATCAAGAAGAAGCAAGAATCAAGTAACGCAAGA	TTACACAAGACAAGTCAATCAAGAAGAAGCAAGAATCAAGTAACGCAAGA	TTATACAAGACAAGTCAATCAAGAAGAAGCAAGAATCAAGTAACGCAAGA	TTATACAAGACAAGTCAATCAAGAAGAAGCAAGAATCAAGTAACTCAAGA	TTATACAAGACAAGTCAATCAAGAAAAAGCAAGAATCAAGTAACTCAAGA	TTATACAAGACAAGTCAATCAAGAAAAAGCAAGAATCAAGTAAATCAAGA	TTATACAAGACAAGTCAATCAAGAAAAAGCAAGAATCAAGTCAATCAAGA	TTATACAAGACAAGTCAATCAAGAAAAAGCAAGAATCAAGACAATCAAGA	TTATACAAGACAAGTCAATCAAGAAAAAGCAAGAATCAAGACAAGCAAGA	TTATACAAGACAAGTCAAACAAGAAAAAGCAAGAATCAAGACAAGCAAGA	TTATACAAGACAAGTCATACAAGAAAAAGCAAGAATCAAGACAAGCAAGA	TTATACAAGACAAGTCATACAAGAAAAAGCAAGAATCAAGACAAGCAAGA	TTATACAAGACAAGTCATACAAGAAAAAGCAAGAATCAAGACAAGCAAGA	TTATACAAGACAAGTCATACAAGAAAAAGCAAGAATCAAGACAAGCAAGA	TTATACAAGACAAGTCATACAAGAAAAAGCAAGAATCAAGACAAGCAAGA	TTATACAAGACAAGTCATACAAGAAAAAGCAAGAATCAAGACAAGCAAGA	TTATACAAGACAAGTCATACAAGAAAAAGCAAGAATCAAGACAAGCAAGA	TTATACAAGACAAGTCATACAAGAAAAAGCAAGAATCAAGACAAGCAAGA	TTATACAAGACAAGTCATACAAGAAAAAGCAAGAATCAAGACAAGCAAGA	TTATACAAGACAAGTCATACAAGAAAAAGCAAGAATCAAGACAAGCAAGA	TTATACAAGACAAGTCATACAAGAAAAAGCAAGAATCAAGACAAGCAAGA	TTATACAAGACAAGTCATACAAGAAAAAGCAAGAATCAAGACAAGCAAGA	TTATACAAGACAAGTCATACAAGAAAAAGCAAGAATCAAGACAAGCAAGA	TTATACAAGACAAGTCATACAAGAAAAAGCAAGAATCAAGACAAGCAAGA	TTATACAAGACAAGTCATACAAGAAAAAGCAAGAATCAAGACAAGCAAGA
56	TGCAGTGAACAGGCCATGCCATTTCGCCTATGCCTGCCACATCCGCGGTA	TGCAGTGAACAGGCCAAGCCATTTCGCCTATGCCTGCCACATCCGCGGTA	TACAGTGAACAGGCCAAGCCATTTCGCCTATGCCTGCCACATCCGCGGTA	TACAGTGAACAGGCCAAGCCATTTCGCCTATGACTGCCACATCCGCGGTA	TACAGTGAACAGGCCAAGCCATTTCGACTATGACTGCCACATCCGCGGTA	TACAGTGAACAGGCCAAGCCATTTCGACTATGACTGCCACATCCGCCGTA	TACAGTGAACAGGCCAAGACATTTCGACTATGACTGCCACATCCGCCGTA	TACAGTGAACAGGCCAAGACATTTCGACTATGACTGACACATCCGCCGTA	TACAGAGAACAGGCCAAGACATTTCGACTATGACTGACACATCCGCCGTA	TACAGAGAATAGGCCAAGACATTTCGACTATGACTGACACATCCGCCGTA	TACAGAGAATAGGCCAAGACATTACGACTATGACTGACACATCCGCCGTA	TACAGAGAATAGGTCAAGACATTACGACTATGACTGACACATCCGCCGTA	TACAGAGCATAGGTCAAGACATTACGACTATGACTGACACATCCGCCGTA	TACAAAGCATAGGTCAAGACATTACGACTATGACTGACACATCCGCCGTA	TACAAAGTATAGGTCAAGACATTACGACTATGACTGACACATCCGCCGTA	TACAAAGTATAGGTCAAGACATTACGACTATGACTGATACATCCGCCGTA	TACAAAGTATAGGTCAAGACATTACGACTATGACTGATAAATCCGCCGTA	TACAAAGTATAGGTCAAGACACTACGACTATGACTGATAAATCCGCCGTA	TACAAAGTATAGGTCAAGACACTACAACTATGACTGATAAATCCGCCGTA	TACAAAGTATAGGTCAAGACACTACAAATATGACTGATAAATCCGCCGTA	TACAAAGTATAGGTCAAGAAACTACAAATATGACTGATAAATCCGCCGTA	TACAAAGTATAGGTCAAGAAACTACAAGTATGACTGATAAATCCGCCGTA	TACAAAGTATAGGTCAAGAAACTACAAGTATTACTGATAAATCCGCCGTA	TACAAAGTATAGGTCAAGAAACTACAAGAATTACTGATAAATCCGCCGTA	TACAAAGTATAGGTCAAGAAACTACAAGAACTACTGATAAATCCGCCGTA	TACAAAGTATAGGTCAAGAAACTACAAGAACTACTGATAAACCCGCCGTA	TACAAAGTATAGGTCAAGAAACTACAAGAACTACAGATAAACCCGCCGTA	TACAAAGTATAGGTCAAGAAAATACAAGAACTACAGATAAACCCGCCGTA	TACAAAGTATAGGACAAGAAAATACAAGAACTACAGATAAACCCGCCGTA	TACAAAGTATAAGACAAGAAAATACAAGAACTACAGATAAACCCGCCGTA	TACAAAGTATAAAACAAGAAAATACAAGAACTACAGATAAACCCGCCGTA	TACAAAGTATAAAACAAGAAAATACAAGAACTACAGATAATCCCGCCGTA	TACAAAGTATAAAACAAGAAAATACAAGAACTACAGATAATCCAGCCGTA	TACAAAGTATAAAACAAGAAAATACAAGAACTACAGATAATCCAGACGTA	TACAAAGTATAAAACAAGAAAATACAAGAACTACAGATAATCAAGACGTA	TACAAAGTATAAAACAAGAAAATACAAGAACTACAGATAATCAAGACATA	TACAAAGTATAAAACAAGAAAATACAAGAACTACAAATAATCAAGACATA	TACAAAGTATAAAACAAGAAAATACAAGAACTACAAATAATCAAGACATA	TACAAAGTATAAAACAAGAAAATACAAGAACTACAAATAATCAAGACATA	TACAAAGTATAAAACAAGAAAATACAAGAACTACAAATAATCAAGACATA	TACAAAGTATAAAACAAGAAAATACAAGAACTACAAATAATCAAGACATA
57	CATTATCGTATTTCGCTTTGAGACGCCTGTCTAGCCATTTCAGCGTTTCG	CATTATCGTATTTCGCTATGAGACGCCTGTCTAGCCATTTCAGCGTTTCG	CATTATCGTATTTCGCTATGAGACACCTGTCTAGCCATTTCAGCGTTTCG	CATTATCGTATTTCGCTATGAGACACCTGTCTAGCCATTTCAGCGTTACG	CATTATCGTATTTCGCTATGAGACACCTGTCTAGCCATTTCAGAGTTACG	CATTATCGTATTTCGCTATGAGACACCTGTCTAGCCATTACAGAGTTACG	CATTATCGTATTTCGCTATGAGACACCTGTCTAGCCATTACAGAGTTAAG	CATTATCGTATTTAGCTATGAGACACCTGTCTAGCCATTACAGAGTTAAG	CATTATCGTATTTAACTATGAGACACCTGTCTAGCCATTACAGAGTTAAG	TATTATCGTATTTAACTATGAGACACCTGTCTAGCCATTACAGAGTTAAG	TATTATAGTATTTAACTATGAGACACCTGTCTAGCCATTACAGAGTTAAG	TACTATAGTATTTAACTATGAGACACCTGTCTAGCCATTACAGAGTTAAG	TACAATAGTATTTAACTATGAGACACCTGTCTAGCCATTACAGAGTTAAG	TACAATAGTATTTAACTATGAGACACCTGTCTAGACATTACAGAGTTAAG	TACAATAGTATTTAACTATGAGACACCTGTCTAGAAATTACAGAGTTAAG	TACAATAGTATTTAACTATGAGACACCTGTCTAGAAATTACAAAGTTAAG	TACAATAGTATTTAACTATGAGACACCAGTCTAGAAATTACAAAGTTAAG	TACAATAGTATTTAACTATGAGACACCAGTCAAGAAATTACAAAGTTAAG	TACAATAGTATTTAACTATGAGACACCAGTCAAGAAACTACAAAGTTAAG	TACAATAGTATTTAACTATGAGACACAAGTCAAGAAACTACAAAGTTAAG	TACAATAGTATTTAACTATGAGAGACAAGTCAAGAAACTACAAAGTTAAG	TACAATAGTATTTAACTATGAGAGACAAGTCAAGAAACTACAAAGTCAAG	TACAAAAGTATTTAACTATGAGAGACAAGTCAAGAAACTACAAAGTCAAG	TACAAAAGTATTTAACTATGAAAGACAAGTCAAGAAACTACAAAGTCAAG	TACAAAAGTATATAACTATGAAAGACAAGTCAAGAAACTACAAAGTCAAG	TACAAAAGTATATAACTATGAAAGACAAGACAAGAAACTACAAAGTCAAG	TACAAAAGTATATAACTATGAAAGACAAGACAAGAAACTACAAAGACAAG	TACAAAAGTATATAACTATGAAAGACAAGACAAGAAGCTACAAAGACAAG	TACAAGAGTATATAACTATGAAAGACAAGACAAGAAGCTACAAAGACAAG	TACAAGAGTATATAACTATGAAAGACAAGACAAGAAGCTACAAAGACAAG	TACAAGAGTATATAACTATGAAAGACAAGACAAGAAGCTACAAAGACAAG	TACAAGAGTATATAACTATGAAAGACAAGACAAGAAGCTACAAAGACAAG	TACAAGAGTATATAACTATGAAAGACAAGACAAGAAGCTACAAAGACAAG	TACAAGAGTATATAACTATGAAAGACAAGACAAGAAGCTACAAAGACAAG	TACAAGAGTATATAACTATGAAAGACAAGACAAGAAGCTACAAAGACAAG	TACAAGAGTATATAACTATGAAAGACAAGACAAGAAGCTACAAAGACAAG	TACAAGAGTATATAACTATGAAAGACAAGACAAGAAGCTACAAAGACAAG	TACAAGAGTATATAACTATGAAAGACAAGACAAGAAGCTACAAAGACAAG	TACAAGAGTATATAACTATGAAAGACAAGACAAGAAGCTACAAAGACAAG	TACAAGAGTATATAACTATGAAAGACAAGACAAGAAGCTACAAAGACAAG	TACAAGAGTATATAACTATGAAAGACAAGACAAGAAGCTACAAAGACAAG
58	GGGACAAATTCGAAGAAAGGACGGATTCGCAGTCATGACAAGCGTTGAGA	GGGACAAATTCGAAGAAAGGACGGATTCGCAGTCAAGACAAGCGTTGAGA	GGGACAAATTCGAAGAAAGGATGGATTCGCAGTCAAGACAAGCGTTGAGA	GGGACAAATTCGAAGAAAAGATGGATTCGCAGTCAAGACAAGCGTTGAGA	GGGACAAATTCGAAGACAAGATGGATTCGCAGTCAAGACAAGCGTTGAGA	GGGACAAATTCGAAGACAAGATGGATTCGCAGTCAAGACAAGCGATGAGA	AGGACAAATTCGAAGACAAGATGGATTCGCAGTCAAGACAAGCGATGAGA	AAGACAAATTCGAAGACAAGATGGATTCGCAGTCAAGACAAGCGATGAGA	AAGACAAATTCGAAGACAAGATGGATTCACAGTCAAGACAAGCGATGAGA	AAGACAAATTCGAAGACAAGATGGATTCACAGTCAAGACAAGCGATAAGA	AAGACAAATTCGAAGACAAGATGGATTCACAGTCAAGACAAGAGATAAGA	AAGACAAATTCGAAGACAAGATGGATTCACAGTCAAGACAAGAGACAAGA	AAGACAAATTCGAAGACAAGATGGATTCACAGTCAAGACAAGAAACAAGA	AAGACAAATTCTAAGACAAGATGGATTCACAGTCAAGACAAGAAACAAGA	AAGACAAATTATAAGACAAGATGGATTCACAGTCAAGACAAGAAACAAGA	AAGACAAATTACAAGACAAGATGGATTCACAGTCAAGACAAGAAACAAGA	AAGACAAATTACAAGACAAGATGGATACACAGTCAAGACAAGAAACAAGA	AAGACAAATTACAAGACAAGATGGATACACAGTCAAGACAAGAATCAAGA	AAGACAAATTACAAGACAAGATGAATACACAGTCAAGACAAGAATCAAGA	AAGACAAATTACAAGACAAGATGAGTACACAGTCAAGACAAGAATCAAGA	AAGACAATTTACAAGACAAGATGAGTACACAGTCAAGACAAGAATCAAGA	AAGACAATTTACAAGACAAGATGAGTACAAAGTCAAGACAAGAATCAAGA	AAGACAATTTACAAGACAAGATGACTACAAAGTCAAGACAAGAATCAAGA	AAGACAATTTACAAGACAAGATGACTACAAAGACAAGACAAGAATCAAGA	AAGACAATTTACAAAACAAGATGACTACAAAGACAAGACAAGAATCAAGA	AAGACAATTTACAAAACAAGATGGCTACAAAGACAAGACAAGAATCAAGA	AAGACAATTTACAAAACAAGATGGCTACAAAGACAAGACAAGAATCAAGA	AAGACAATTTACAAAACAAGATGGCTACAAAGACAAGACAAGAATCAAGA	AAGACAATTTACAAAACAAGATGGCTACAAAGACAAGACAAGAATCAAGA	AAGACAATTTACAAAACAAGATGGCTACAAAGACAAGACAAGAATCAAGA	AAGACAATTTACAAAACAAGATGGCTACAAAGACAAGACAAGAATCAAGA	AAGACAATTTACAAAACAAGATGGCTACAAAGACAAGACAAGAATCAAGA	AAGACAATTTACAAAACAAGATGGCTACAAAGACAAGACAAGAATCAAGA	AAGACAATTTACAAAACAAGATGGCTACAAAGACAAGACAAGAATCAAGA	AAGACAATTTACAAAACAAGATGGCTACAAAGACAAGACAAGAATCAAGA	AAGACAATTTACAAAACAAGATGGCTACAAAGACAAGACAAGAATCAAGA	AAGACAATTTACAAAACAAGATGGCTACAAAGACAAGACAAGAATCAAGA	AAGACAATTTACAAAACAAGATGGCTACAAAGACAAGACAAGAATCAAGA	AAGACAATTTACAAAACAAGATGGCTACAAAGACAAGACAAGAATCAAGA	AAGACAATTTACAAAACAAGATGGCTACAAAGACAAGACAAGAATCAAGA	AAGACAATTTACAAAACAAGATGGCTACAAAGACAAGACAAGAATCAAGA
59	AGCGCACGCAGGTAAGCTATTGAGTGCTCCGTGCTCATCTCCGTTGATAA	AGCGCACGCAGGTAAGCTATTGAGTGCTCCGTACTCATCTCCGTTGATAA	AGCGCACGCAGGTAAGCTATTGAGTGCTACGTACTCATCTCCGTTGATAA	AGCGCACGCAGGTAAGCTATTGAGTGCTACGTACTCATCTCCGTTTATAA	AGCGCACGCAGGTAAGCTATTGAGTACTACGTACTCATCTCCGTTTATAA	AGCGCACGCAAGTAAGCTATTGAGTACTACGTACTCATCTCCGTTTATAA	AGCGCACGCAAGTAAGCTATTGAGTACTACGAACTCATCTCCGTTTATAA	AGCGCACGCAAGTAAGCTATTGAGTACTACGAACTCATCTCCGTATATAA	AGGGCACGCAAGTAAGCTATTGAGTACTACGAACTCATCTCCGTATATAA	AGGGCACGCAAGTAAGCTATTAAGTACTACGAACTCATCTCCGTATATAA	AGGGCACGCAAGTAAGCTATTAAGTACTACGAACTCATCTCCCTATATAA	AGGGCACGCAAGTAAGCTATTAAGTACTACGAACTCATATCCCTATATAA	AGGGCACGCAAGTAAGCTATTAAGTACTACAAACTCATATCCCTATATAA	AGGGCACGCAAGTAAGCTATTAAGTACTACAAATTCATATCCCTATATAA	AGGGCACGCAAGTAAGCTATTAAGTACTACAAATACATATCCCTATATAA	AGGGCACGCAAGTAAGCTATAAAGTACTACAAATACATATCCCTATATAA	AGGGCACGCAAGTAAGCTATAAAGTACTACAAATACAAATCCCTATATAA	AGGGCACGCAAGTAAGCTATAAAGTACTACAAATACAAAGCCCTATATAA	AGGGCACGCAAGCAAGCTATAAAGTACTACAAATACAAAGCCCTATATAA	AGGGCACGCAAGCAAGATATAAAGTACTACAAATACAAAGCCCTATATAA	AGGGCACGCAAGCAAGATACAAAGTACTACAAATACAAAGCCCTATATAA	AAGGCACGCAAGCAAGATACAAAGTACTACAAATACAAAGCCCTATATAA	AAGGCAAGCAAGCAAGATACAAAGTACTACAAATACAAAGCCCTATATAA	AAGGCAAGCAAGCAAGATACAAAGTACTACAATTACAAAGCCCTATATAA	AAGGCAAGCAAGCAAGATACAAAGTACTACAATTACAAAGACCTATATAA	AAGGCAAGCAAGCAAGATACAAAGTACTACAATTACAAAGAACTATATAA	AAGGCAAGCAAGCAAGATACAAAGTACTACAATTACAAAGAACTATATAA	AAGGCAAGCAAGCAAGATACAAAGTACTACAATTACAAAGAACTATATAA	AAGGCAAGCAAGCAAGATACAAAGTACTACAATTACAAAGAACTATATAA	AAGGCAAGCAAGCAAGATACAAAGTACTACAATTACAAAGAACTATATAA	AAGGCAAGCAAGCAAGATACAAAGTACTACAATTACAAAGAACTATATAA	AAGGCAAGCAAGCAAGATACAAAGTACTACAATTACAAAGAACTATATAA	AAGGCAAGCAAGCAAGATACAAAGTACTACAATTACAAAGAACTATATAA	AAGGCAAGCAAGCAAGATACAAAGTACTACAATTACAAAGAACTATATAA	AAGGCAAGCAAGCAAGATACAAAGTACTACAATTACAAAGAACTATATAA	AAGGCAAGCAAGCAAGATACAAAGTACTACAATTACAAAGAACTATATAA	AAGGCAAGCAAGCAAGATACAAAGTACTACAATTACAAAGAACTATATAA	AAGGCAAGCAAGCAAGATACAAAGTACTACAATTACAAAGAACTATATAA	AAGGCAAGCAAGCAAGATACAAAGTACTACAATTACAAAGAACTATATAA	AAGGCAAGCAAGCAAGATACAAAGTACTACAATTACAAAGAACTATATAA	AAGGCAAGCAAGCAAGATACAAAGTACTACAATTACAAAGAACTATATAA
60	CTGTGCGGTGACTGTCTTGTTCAGCAACGGGCAAATCACGCGTGAAAGAA	CTGTGCGGTGAATGTCTTGTTCAGCAACGGGCAAATCACGCGTGAAAGAA	CTGTGCGGTGAATGTCTTGTTCAGCAACGGGCAAATCACGCGTGCAAGAA	CTGTACGGTGAATGTCTTGTTCAGCAACGGGCAAATCACGCGTGCAAGAA	CTGTACGGTGAATGTCTTGTTCAGCAACGGGCAAATCACGAGTGCAAGAA	CTGTACGGTAAATGTCTTGTTCAGCAACGGGCAAATCACGAGTGCAAGAA	CTGTACGGTAAATGTCTTATTCAGCAACGGGCAAATCACGAGTGCAAGAA	CTGTACGGTAAATGTCTTATTCAGCAACGGGCAAATCAAGAGTGCAAGAA	CTGTACGGTAAATGTCTTATTCAGCAACGGGCAAATCAAGAGTACAAGAA	CTGTACGGTAAATGTCTTATTCAGCAACGGGCAAATCAAGATTACAAGAA	CTGTACGGTAAATGTCTTATTCAGCAACAGGCAAATCAAGATTACAAGAA	CTGTACGGTAAATGTCTTATTCAGCAACAAGCAAATCAAGATTACAAGAA	CTGTACGGTAAATGTCTTATTCAGCAACAAGCAAGTCAAGATTACAAGAA	CTGTACGGTAAATGTCTTATTCAGCAACAAGCAAGACAAGATTACAAGAA	CTGTACAGTAAATGTCTTATTCAGCAACAAGCAAGACAAGATTACAAGAA	CTATACAGTAAATGTCTTATTCAGCAACAAGCAAGACAAGATTACAAGAA	CTATACAGCAAATGTCTTATTCAGCAACAAGCAAGACAAGATTACAAGAA	CTATATAGCAAATGTCTTATTCAGCAACAAGCAAGACAAGATTACAAGAA	CTATATAGCAAATGTCTTATTCAGCAACAAGCAAGACAAAATTACAAGAA	CTATATAACAAATGTCTTATTCAGCAACAAGCAAGACAAAATTACAAGAA	CTATATAACAAATGTCTAATTCAGCAACAAGCAAGACAAAATTACAAGAA	CTATATAACAAATGTCTAAGTCAGCAACAAGCAAGACAAAATTACAAGAA	CTATATAACAAATGTCTAAGTCAGCTACAAGCAAGACAAAATTACAAGAA	CTATATAACAAATGTCTAAGTTAGCTACAAGCAAGACAAAATTACAAGAA	CTATATAACAAATGTCTAAGTTAACTACAAGCAAGACAAAATTACAAGAA	CTATATAACAAATGTCTAAGTTAACTACAAGCAAGACAAAATTACAAGAC	TTATATAACAAATGTCTAAGTTAACTACAAGCAAGACAAAATTACAAGAC	TTATATAACAAATGTCTAAGTTAACTACAAGCAAGACAAAATTACAAGAC	TTATATAACAAATGTCTAAGTTAACTACAAGCAAGACAAAATTACAAGAC	TTATATAACAAATGTCTAAGTTAACTACAAGCAAGACAAAATTACAAGAC	TTATATAACAAATGTCTAAGTTAACTACAAGCAAGACAAAATTACAAGAC	TTATATAACAAATGTCTAAGTTAACTACAAGCAAGACAAAATTACAAGAC	TTATATAACAAATGTCTAAGTTAACTACAAGCAAGACAAAATTACAAGAC	TTATATAACAAATGTCTAAGTTAACTACAAGCAAGACAAAATTACAAGAC	TTATATAACAAATGTCTAAGTTAACTACAAGCAAGACAAAATTACAAGAC	TTATATAACAAATGTCTAAGTTAACTACAAGCAAGACAAAATTACAAGAC	TTATATAACAAATGTCTAAGTTAACTACAAGCAAGACAAAATTACAAGAC	TTATATAACAAATGTCTAAGTTAACTACAAGCAAGACAAAATTACAAGAC	TTATATAACAAATGTCTAAGTTAACTACAAGCAAGACAAAATTACAAGAC	TTATATAACAAATGTCTAAGTTAACTACAAGCAAGACAAAATTACAAGAC	TTATATAACAAATGTCTAAGTTAACTACAAGCAAGACAAAATTACAAGAC
61	CGCAATCAAAGGGCTGGCCATCGCCTACCACCGCATGCATAATTGGTACC	CGCAATCAAAGGGCTGGCCATCGCCTACCACCGCAAGCATAATTGGTACC	CGCAATCAAAGAGCTGGCCATCGCCTACCACCGCAAGCATAATTGGTACC	CGCAATCAAAGAGCTAGCCATCGCCTACCACCGCAAGCATAATTGGTACC	CGCAATCAAAGAGCTAGCCATCGCCTACCACCGCAAGCATGATTGGTACC	CGCAAGCAAAGAGCTAGCCATCGCCTACCACCGCAAGCATGATTGGTACC	CGCAAGCAAAGAACTAGCCATCGCCTACCACCGCAAGCATGATTGGTACC	AGCAAGCAAAGAACTAGCCATCGCCTACCACCGCAAGCATGATTGGTACC	AGCAAGCAAAGAACTAGACATCGCCTACCACCGCAAGCATGATTGGTACC	AGCAAGCAAAGAACTACACATCGCCTACCACCGCAAGCATGATTGGTACC	AGCAAGCAAAGAACTACACATCGACTACCACCGCAAGCATGATTGGTACC	AGCAAGCAAAGAACTACACATCGACTACTACCGCAAGCATGATTGGTACC	AGCAAGCAAAGAACTACACATCGACTACTACAGCAAGCATGATTGGTACC	AGCAAGCAAAGAACTACACATCTACTACTACAGCAAGCATGATTGGTACC	AGCAAGCAAAGAACTACAAATCTACTACTACAGCAAGCATGATTGGTACC	AGCAAGCAAAGAACTACAAATCTACTACTACAGCAAGCATGATTGGTACT	AGCAAGCAAAGAACTACAAATCTACTACTACAGCAAGCATGATTGATACT	AGCAAGAAAAGAACTACAAATCTACTACTACAGCAAGCATGATTGATACT	AGCAAGACAAGAACTACAAATCTACTACTACAGCAAGCATGATTGATACT	AGAAAGACAAGAACTACAAATCTACTACTACAGCAAGCATGATTGATACT	AGAAAGACAAGAACTACAAATCTACTACTACAGTAAGCATGATTGATACT	AGAAATACAAGAACTACAAATCTACTACTACAGTAAGCATGATTGATACT	AGAAATACAAGAACTACAAATCTACTACTACAGTAACCATGATTGATACT	AGAAATACAAGAACTACAAATCTACTACTACAGTAACTATGATTGATACT	AGAAATACAAGAACTACAAATCTACTACTACAGTAACTATGATTGATATT	AGAAATACAAGAACTACAAATCTACTACTACAGTAACTATGATTGACATT	AGAAATACAAGAACTACAAATCTACTACTACAGTAACTATGATTGACAGT	AGAAATACAAGAACTACAAATCTACTACTACATTAACTATGATTGACAGT	AGAAATACAAGAACTACAAAACTACTACTACATTAACTATGATTGACAGT	AGAAATACAAGAACTACAAGACTACTACTACATTAACTATGATTGACAGT	AGAAATACAAGAATTACAAGACTACTACTACATTAACTATGATTGACAGT	AGACATACAAGAATTACAAGACTACTACTACATTAACTATGATTGACAGT	AGACAGACAAGAATTACAAGACTACTACTACATTAACTATGATTGACAGT	AGACAGACAAGAATTACAAGACTACTACTACATTAAATATGATTGACAGT	AGACAGACAAGAATTACAAGACTACTACTACATTAAAGATGATTGACAGT	AGACAGACAAGAATTACAAGACTACTACTACAATAAAGATGATTGACAGT	AGACAGACAAGAATTACAAGACTACTACTACAATAAAGATGATTGACAGT	AGACAGACAAGAATTACAAGACTACTACTACAATAAAGATGATTGACAGT	AGACAGACAAGAATTACAAGACTACTACTACAATAAAGATGATTGACAGT	AGACAGACAAGAATTACAAGACTACTACTACAATAAAGATGATTGACAGT	AGACAGACAAGAATTACAAGACTACTACTACAATAAAGATGATTGACAGT
62	CCGTGCGCTAGTCACATCCTGAGCTGGAAATGTAGCACTGGGAATATACG	CCGTGCGCTAGTCACATCCTGAGCTGGAAATGTCGCACTGGGAATATACG	CCGTGCGCTAGTCACATACTGAGCTGGAAATGTCGCACTGGGAATATACG	CCGTGCGCTAGTCACATACTGAGCTGGAAATGTCGCACTGGGAATATAAG	CCGTGCGCTAGTCACATACTGAGATGGAAATGTCGCACTGGGAATATAAG	CCGTGCGCTAGTCACATACTAAGATGGAAATGTCGCACTGGGAATATAAG	CCGTGCGCTAGTCACATACTAAGATGGAAAAGTCGCACTGGGAATATAAG	CCGTTCGCTAGTCACATACTAAGATGGAAAAGTCGCACTGGGAATATAAG	CCGTTCGCTAGTCACATACTAAGATGGAAAAGTCGCACTGGGAATACAAG	CCGTTCGCAAGTCACATACTAAGATGGAAAAGTCGCACTGGGAATACAAG	CCGTTCGCAAGTTACATACTAAGATGGAAAAGTCGCACTGGGAATACAAG	CCGTTCGCAAGTTACATACTAAGATGGAAAAGTCGCACTGGAAATACAAG	CCGTTCGCAAGTTACATACTAAGATGGAAAAGTCGCACTGGAACTACAAG	CCGTTCGCAAGTTACATACTAAGATGAAAAAGTCGCACTGGAACTACAAG	CCGTTCGCAAGTTACATACTAAGATGAACAAGTCGCACTGGAACTACAAG	CAGTTCGCAAGTTACATACTAAGATGAACAAGTCGCACTGGAACTACAAG	AAGTTCGCAAGTTACATACTAAGATGAACAAGTCGCACTGGAACTACAAG	AAGTCCGCAAGTTACATACTAAGATGAACAAGTCGCACTGGAACTACAAG	AAGTCCGCAAGTTATATACTAAGATGAACAAGTCGCACTGGAACTACAAG	AAGTCAGCAAGTTATATACTAAGATGAACAAGTCGCACTGGAACTACAAG	AAGTCAGCAAGTTATATACTAAGATGAACAAGTCGCACTTGAACTACAAG	AAGTCAGCAAGTTATATACTAAGATGAACAAGTCGCACTTTAACTACAAG	AAGTCAGCAAGTTATATACTAAGATGAACAAGTCGCACTATAACTACAAG	AAGTCAGCAAGTTATATACTAAGATGAACAAGTCGCACTATTACTACAAG	AAGTCAGCAAGTTATATACTAAGATGAACAAGTCGCACTACTACTACAAG	AAGGCAGCAAGTTATATACTAAGATGAACAAGTCGCACTACTACTACAAG	AAGGCAGCAAGTTATATACTAAGATGAACAAGTCGAACTACTACTACAAG	AAGGCAGCAAGTTATATACTAAGATGAACAAGTCAAACTACTACTACAAG	AAGGCAGCAAGTTATATACTAAGATGAACAAGTCAGACTACTACTACAAG	AAGGCAGCAAGTTATATACTAAGATGAACAAGTCAGACTACTACTACAAG	AAGGCAGCAAGTTATATACTAAGATGAACAAGTCAGACTACTACTACAAG	AAGGCAGCAAGTTATATACTAAGATGAACAAGTCAGACTACTACTACAAG	AAGGCAGCAAGTTATATACTAAGATGAACAAGTCAGACTACTACTACAAG	AAGGCAGCAAGTTATATACTAAGATGAACAAGTCAGACTACTACTACAAG	AAGGCAGCAAGTTATATACTAAGATGAACAAGTCAGACTACTACTACAAG	AAGGCAGCAAGTTATATACTAAGATGAACAAGTCAGACTACTACTACAAG	AAGGCAGCAAGTTATATACTAAGATGAACAAGTCAGACTACTACTACAAG	AAGGCAGCAAGTTATATACTAAGATGAACAAGTCAGACTACTACTACAAG	AAGGCAGCAAGTTATATACTAAGATGAACAAGTCAGACTACTACTACAAG	AAGGCAGCAAGTTATATACTAAGATGAACAAGTCAGACTACTACTACAAG	AAGGCAGCAAGTTATATACTAAGATGAACAAGTCAGACTACTACTACAAG
63	ACGTCGACGGCTCATACCTGCACATAACCACCGACTGAATAGTCTGCAAA	ACGTCGACGGCTCATACCTGCACATAACCACCGACTGAATAGTCTACAAA	ACGTCGACGGCTCATACCTACACATAACCACCGACTGAATAGTCTACAAA	ACGTCGACGGCTCATACCTACAAATAACCACCGACTGAATAGTCTACAAA	ACGTCGACGGCTCATAACTACAAATAACCACCGACTGAATAGTCTACAAA	ACGTCGAAGGCTCATAACTACAAATAACCACCGACTGAATAGTCTACAAA	ACGTCGAAGGCTCATAACTACAAATAAACACCGACTGAATAGTCTACAAA	ACGTCGAAGGCTCATAACTACAAATAAACAACGACTGAATAGTCTACAAA	ACGTCGAAGGCTCATAACTACAAATAAACTACGACTGAATAGTCTACAAA	ACGTCGAAGGCTCATAACTACAAATAAACTACGACTGAATAGTCTACAAG	ACGTCGAAGGCTCATAACTACAAATAAACTACGACTGAATAGTATACAAG	ACGTCGAAGGCTCATAACTACAAATAAACTACGAGTGAATAGTATACAAG	ACGTCGAAGGCACATAACTACAAATAAACTACGAGTGAATAGTATACAAG	ACGTCCAAGGCACATAACTACAAATAAACTACGAGTGAATAGTATACAAG	ACGTCCAAGGCAAATAACTACAAATAAACTACGAGTGAATAGTATACAAG	ACGTCCAAGACAAATAACTACAAATAAACTACGAGTGAATAGTATACAAG	AAGTCCAAGACAAATAACTACAAATAAACTACGAGTGAATAGTATACAAG	AAGGCCAAGACAAATAACTACAAATAAACTACGAGTGAATAGTATACAAG	AAGGCCAAGACAAATAACTACAAATAAACTACGAGTAAATAGTATACAAG	AAGGCCAAGACAAATAACTACAAATAAACTACGAGTATATAGTATACAAG	AAGGCCAAGACAAATAACTACAAATAAACTACGAGTATATACTATACAAG	AAGGCCAAGACAAATAACTACAAATAAACTACAAGTATATACTATACAAG	AAGGCCAAGACAAATAACTACAAATAAACTACAAATATATACTATACAAG	AAGGCCAAGACAAATAACTACAAATAAACTACATATATATACTATACAAG	AAGGCCAAGACAAATAACTACAAATAAACTACATATATAAACTATACAAG	AAGGCCAAGACAAATAACTACAAATAAACTACTTATATAAACTATACAAG	AAGGCCAAGACAAATAACTACAAATAAACTACTTATATAAACTATACAAG	AAGGCCAAGACAAATAACTACAAATAAACTACTTATATAAACTATACAAG	AAGGCCAAGACAAATAACTACAAATAAACTACTTATATAAACTATACAAG	AAGGCCAAGACAAATAACTACAAATAAACTACTTATATAAACTATACAAG	AAGGCCAAGACAAATAACTACAAATAAACTACTTATATAAACTATACAAG	AAGGCCAAGACAAATAACTACAAATAAACTACTTATATAAACTATACAAG	AAGGCCAAGACAAATAACTACAAATAAACTACTTATATAAACTATACAAG	AAGGCCAAGACAAATAACTACAAATAAACTACTTATATAAACTATACAAG	AAGGCCAAGACAAATAACTACAAATAAACTACTTATATAAACTATACAAG	AAGGCCAAGACAAATAACTACAAATAAACTACTTATATAAACTATACAAG	AAGGCCAAGACAAATAACTACAAATAAACTACTTATATAAACTATACAAG	AAGGCCAAGACAAATAACTACAAATAAACTACTTATATAAACTATACAAG	AAGGCCAAGACAAATAACTACAAATAAACTACTTATATAAACTATACAAG	AAGGCCAAGACAAATAACTACAAATAAACTACTTATATAAACTATACAAG	AAGGCCAAGACAAATAACTACAAATAAACTACTTATATAAACTATACAAG
64	CAGAAAATCAGAGACCTTATCCATTTGATTGGCCATATAGCATGTCTTCA	CAGAAAATCAGAGACCTTATACATTTGATTGGCCATATAGCATGTCTTCA	CAGAAAATCAGAGACCTTATACATTTGATTGGCCATATAGCATGACTTCA	CAGAAAATCAAAGACCTTATACATTTGATTGGCCATATAGCATGACTTCA	CAGAAAATCAAAGACCTTATACATTTGATTGGCCATACAGCATGACTTCA	CAGAAAAGCAAAGACCTTATACATTTGATTGGCCATACAGCATGACTTCA	TAGAAAAGCAAAGACCTTATACATTTGATTGGCCATACAGCATGACTTCA	TAGAAAAGCAAAGACATTATACATTTGATTGGCCATACAGCATGACTTCA	TAGAAAAGCAAAGAAATTATACATTTGATTGGCCATACAGCATGACTTCA	TAGAAAAGCCAAGAAATTATACATTTGATTGGCCATACAGCATGACTTCA	TAGAAAAGCCAAGAAATTATACAATTGATTGGCCATACAGCATGACTTCA	TAGAAAAGCCAAGAAATTATACAATTAATTGGCCATACAGCATGACTTCA	TAGAAAAGCCAAGAAATTATACAATTAATTAGCCATACAGCATGACTTCA	TAGAAAAGCCAAGAAATTATACAATTAATTAGACATACAGCATGACTTCA	TAGAAAAGCCAAGAAATTATACAATTAATAAGACATACAGCATGACTTCA	TAGAAAAGCCAAGAAATTATACAATTAATAAGACATACAGCATGACTACA	TAGAAAAGCCAAGAAATTATACAATTAATAAGACATACAGCAAGACTACA	TAGAAAAGCCAAGAAATTATACAATTAATAAGATATACAGCAAGACTACA	TAGAAAAGCCAAGAAATTATACAATTAATAAGATATATAGCAAGACTACA	TAGAAAAGCCAAGAAATTATACAATTAATAAGATATATATCAAGACTACA	TAGAAAAGCCAAGAAACTATACAATTAATAAGATATATATCAAGACTACA	TAGAAAAGCCAAGAAACTATACAAATAATAAGATATATATCAAGACTACA	TAGAAAAGCCAAGAAACTATACAAATAATAAGATATATATCAAGACTACT	TAGAAAAGCCAAGAAACTATACAAATAATAAGATATATATAAAGACTACT	TAGAAAAGCCAAGAAACTATACAAATAATAAGATATATACAAAGACTACT	TAGAAAAGCCAAGAAACTATACAAATTATAAGATATATACAAAGACTACT	TAGAAAAGCCAAGAAACTATACAAATTATAAAATATATACAAAGACTACT	TAGAAAAGCCAAGAAACTATACAAACTATAAAATATATACAAAGACTACT	TAGAAAAGCCAAGAAACTATACAAACTATATAATATATACAAAGACTACT	TAGAAAAGCCAAGAAACTATACAAACTATATATTATATACAAAGACTACT	TAGAAAAGCCAAGAAACTATACAAACTATATATTATATACAAAGACTACT	TAGAAAAGCCAAGAAACTATACAAACTATATATTATATACAAAGACTACT	TAGAAAAGCCAAGAAACTATACAAACTATATATTATATACAAAGACTACT	TAGAAAAGCCAAGAAACTATACAAACTATATATTATATACAAAGACTACT	TAGAAAAGCCAAGAAACTATACAAACTATATATTATATACAAAGACTACT	TAGAAAAGCCAAGAAACTATACAAACTATATATTATATACAAAGACTACT	TAGAAAAGCCAAGAAACTATACAAACTATATATTATATACAAAGACTACT	TAGAAAAGCCAAGAAACTATACAAACTATATATTATATACAAAGACTACT	TAGAAAAGCCAAGAAACTATACAAACTATATATTATATACAAAGACTACT	TAGAAAAGCCAAGAAACTATACAAACTATATATTATATACAAAGACTACT	TAGAAAAGCCAAGAAACTATACAAACTATATATTATATACAAAGACTACT
65	CTACATACGGAAACCGTCAGCCGATACCCATGGACCTAATGCCGCCTCGC	CTACATACGGAAACCGTCAGCCGATACCCATAGACCTAATGCCGCCTCGC	CTACATACGGAAACCGTCAGCCGATACCCATAGACCTAATGACGCCTCGC	CTACATACGGAAACCGTCAGCCGATACCCATAGACCTAATGACGCCTAGC	CTACATACAGAAACCGTCAGCCGATACCCATAGACCTAATGACGCCTAGC	CTACATACAGAAACAGTCAGCCGATACCCATAGACCTAATGACGCCTAGC	CTACATACAGAAACAGTCAGCAGATACCCATAGACCTAATGACGCCTAGC	CTACATACAGAAACAGTCAGCAGATACCCAAAGACCTAATGACGCCTAGC	CTACATACAGAAACAGTCAGCAGATACACAAAGACCTAATGACGCCTAGC	CTACATACAGAAACAGTCAGCAGATACACAAAGACATAATGACGCCTAGC	CTACATACAGAAACAGTCAGCAGATACACAAAGACAAAATGACGCCTAGC	CTACATACAGAAACAGTCAGCAGATACACAAAGACAAAATGACGACTAGC	CTACATACAGAAACAGTCAGCAGATACACAAAGACAAAATGACGACTAGT	CTACATACAGAAACAGTCAGCAGATATACAAAGACAAAATGACGACTAGT	CTACATACAGAAACAGTCAGCAGATATACAAAGACAAAATGATGACTAGT	CTACATACAAAAACAGTCAGCAGATATACAAAGACAAAATGATGACTAGT	CTACATACAAGAACAGTCAGCAGATATACAAAGACAAAATGATGACTAGT	TTACATACAAGAACAGTCAGCAGATATACAAAGACAAAATGATGACTAGT	TTACATACAAGAACAGTCAGCAGATATACAAAGACAAGATGATGACTAGT	TTACATACAAGAACAGTCAGCAAATATACAAAGACAAGATGATGACTAGT	TTACATACAAGAACAGTCAACAAATATACAAAGACAAGATGATGACTAGT	TTACATACAAGAACAGTCAAGAAATATACAAAGACAAGATGATGACTAGT	TTACATACAAGAAAAGTCAAGAAATATACAAAGACAAGATGATGACTAGT	TTACATACAAGAAAAGACAAGAAATATACAAAGACAAGATGATGACTAGT	TTACATACAAGAAAAGACAAGAATTATACAAAGACAAGATGATGACTAGT	TTACATACAAGAAAAGACAAGAATTATACAAAGACAAGATGATGACTAGT	TTACATACAAGAAAAGACAAGAATTATACAAAGACAAGATGATGACTAGT	TTACATACAAGAAAAGACAAGAATTATACAAAGACAAGATGATGACTAGT	TTACATACAAGAAAAGACAAGAATTATACAAAGACAAGATGATGACTAGT	TTACATACAAGAAAAGACAAGAATTATACAAAGACAAGATGATGACTAGT	TTACATACAAGAAAAGACAAGAATTATACAAAGACAAGATGATGACTAGT	TTACATACAAGAAAAGACAAGAATTATACAAAGACAAGATGATGACTAGT	TTACATACAAGAAAAGACAAGAATTATACAAAGACAAGATGATGACTAGT	TTACATACAAGAAAAGACAAGAATTATACAAAGACAAGATGATGACTAGT	TTACATACAAGAAAAGACAAGAATTATACAAAGACAAGATGATGACTAGT	TTACATACAAGAAAAGACAAGAATTATACAAAGACAAGATGATGACTAGT	TTACATACAAGAAAAGACAAGAATTATACAAAGACAAGATGATGACTAGT	TTACATACAAGAAAAGACAAGAATTATACAAAGACAAGATGATGACTAGT	TTACATACAAGAAAAGACAAGAATTATACAAAGACAAGATGATGACTAGT	TTACATACAAGAAAAGACAAGAATTATACAAAGACAAGATGATGACTAGT	TTACATACAAGAAAAGACAAGAATTATACAAAGACAAGATGATGACTAGT
66	CAGACGTGGCACCTAGTACTTGATTCACTGCATTTACCACTTGTGTAGAT	CAGACGTGGCACCTAGTACTTGATTCACTGCATTTACTACTTGTGTAGAT	CAGACGTGGCACCTAGTACTTGATTCACTACATTTACTACTTGTGTAGAT	CAGACGTGGCACCAAGTACTTGATTCACTACATTTACTACTTGTGTAGAT	CAGACGTGGCACCAAGTACTTAATTCACTACATTTACTACTTGTGTAGAT	CAGACGTGGCACCAAGTACTTAATTAACTACATTTACTACTTGTGTAGAT	CAGACGTGGCACCAAGTACTTAATTAACTACATTTACTACTAGTGTAGAT	CAGACGTGGCACCAAGTACTTAATTAACTACATTTACTACAAGTGTAGAT	CAGACGTGGCACCAAGTACTTAATTAACTACATTTACTACAAGTATAGAT	CAGACGTGGCACCAAGTACTTAATTAACTACATATACTACAAGTATAGAT	CAGACGTGGCAACAAGTACTTAATTAACTACATATACTACAAGTATAGAT	CAGACGTGGCAAGAAGTACTTAATTAACTACATATACTACAAGTATAGAT	CAGACGTTGCAAGAAGTACTTAATTAACTACATATACTACAAGTATAGAT	AAGACGTTGCAAGAAGTACTTAATTAACTACATATACTACAAGTATAGAT	AAGACGTTTCAAGAAGTACTTAATTAACTACATATACTACAAGTATAGAT	AAGACGTTTCAAGAACTACTTAATTAACTACATATACTACAAGTATAGAT	AAGACGTATCAAGAACTACTTAATTAACTACATATACTACAAGTATAGAT	AAGACTTATCAAGAACTACTTAATTAACTACATATACTACAAGTATAGAT	AAGACTTATCAAGAACTACATAATTAACTACATATACTACAAGTATAGAT	AAGACTTATCAAGAACTACATAATTAACTACATATACTACAAGTATAAAT	AAGACTTATCAAGAACTACATAATTAACTACATATACTACAAGTATAAAG	AAGACTTATCAAGAACTACATAATTAACTACATATACTACAACTATAAAG	AAGACTTATCAAGAACTACATAATTAACTATATATACTACAACTATAAAG	AAGACTTATCAAGAACTACATAATTAACTATATAAACTACAACTATAAAG	AAGACTTATCAAGAACTACATAATTAACTATATAAACTACAACTACAAAG	AAGACTTATCAAGAACTACATAATTAACTATATAAACTACAATTACAAAG	AAGACTTATCAAGAACTACATAATTAACTATATAAACTACAATTACAAAG	AAGACTTATCAAGAACTACATAATTAACTATATAAACTACAATTACAAAG	AAGACTTATCAAGAACTACATAATTAACTATATAAACTACAATTACAAAG	AAGACTTATCAAGAACTACATAATTAACTATATAAACTACAATTACAAAG	AAGACTTATCAAGAACTACATAATTAACTATATAAACTACAATTACAAAG	AAGACTTATCAAGAACTACATAATTAACTATATAAACTACAATTACAAAG	AAGACTTATCAAGAACTACATAATTAACTATATAAACTACAATTACAAAG	AAGACTTATCAAGAACTACATAATTAACTATATAAACTACAATTACAAAG	AAGACTTATCAAGAACTACATAATTAACTATATAAACTACAATTACAAAG	AAGACTTATCAAGAACTACATAATTAACTATATAAACTACAATTACAAAG	AAGACTTATCAAGAACTACATAATTAACTATATAAACTACAATTACAAAG	AAGACTTATCAAGAACTACATAATTAACTATATAAACTACAATTACAAAG	AAGACTTATCAAGAACTACATAATTAACTATATAAACTACAATTACAAAG	AAGACTTATCAAGAACTACATAATTAACTATATAAACTACAATTACAAAG	AAGACTTATCAAGAACTACATAATTAACTATATAAACTACAATTACAAAG
67	GGCCTGAGCGCTATCTATAAAAAGACCTACTTGTGCAAACGAGCCTGTGA	GGCCTGAGCGCTATCTATAAAAAGACCTACTTGTGCAAACGAGCCTGAGA	GGCCTGAGCGCTATATATAAAAAGACCTACTTGTGCAAACGAGCCTGAGA	GGCCTGAGCGCTATATATAAAAAGACCTACTTGTGCAAACGAGCATGAGA	GGCCTGAGCGCTATATATAAAAAGACCTACTTGTACAAACGAGCATGAGA	GGCCTGAGCGCTATATATAAAAAGACCTACTTATACAAACGAGCATGAGA	GGCCTGAGCACTATATATAAAAAGACCTACTTATACAAACGAGCATGAGA	GGCCAGAGCACTATATATAAAAAGACCTACTTATACAAACGAGCATGAGA	GGCCAGATCACTATATATAAAAAGACCTACTTATACAAACGAGCATGAGA	GGCCAGATCACTATATATAAAAAGACCTACTTATACAAACGAGCATGACA	GGCCAGATCACTATATATAAAAAGAACTACTTATACAAACGAGCATGACA	GGCCAGATCACTATATATAAAAAGAACTACTTATACAAACAAGCATGACA	GGTCAGATCACTATATATAAAAAGAACTACTTATACAAACAAGCATGACA	GGTCAGATCACTATATATAAAAAGAACTACATATACAAACAAGCATGACA	GGTCAGATCACTATATATAAAAAGAACTACATATACAAACAAGCAAGACA	GGTCAGATCACTATATATAAAAAGAACTACATATACAAACAAACAAGACA	GGTCAGATCACTATATATAAAAAGAACTACATATACAAAGAAACAAGACA	GGTCAGATCACTATATATAAAAAGAACTATATATACAAAGAAACAAGACA	AGTCAGATCACTATATATAAAAAGAACTATATATACAAAGAAACAAGACA	AGACAGATCACTATATATAAAAAGAACTATATATACAAAGAAACAAGACA	AGAAAGATCACTATATATAAAAAGAACTATATATACAAAGAAACAAGACA	AGAAAGATCACTATATATACAAAGAACTATATATACAAAGAAACAAGACA	AGAAAGATCACTATATATACAAAGAACTATATATACAAAGAAACAAGACT	AGAAAGATCACTATATATACAAAGAACTATATATACAAAGAAACAAGATT	AGAAAGATCACTATATATACAAAGAACTATATATACAAAGATACAAGATT	AGAAAGATCACTATATATACAAAGAACTATATATACAAAGATACAAGATT	AGAAAGATCACTATATATACAAAGAACTATATATACAAAGATACAAGATT	AGAAAGATCACTATATATACAAAGAACTATATATACAAAGATACAAGATT	AGAAAGATCACTATATATACAAAGAACTATATATACAAAGATACAAGATT	AGAAAGATCACTATATATACAAAGAACTATATATACAAAGATACAAGATT	AGAAAGATCACTATATATACAAAGAACTATATATACAAAGATACAAGATT	AGAAAGATCACTATATATACAAAGAACTATATATACAAAGATACAAGATT	AGAAAGATCACTATATATACAAAGAACTATATATACAAAGATACAAGATT	AGAAAGATCACTATATATACAAAGAACTATATATACAAAGATACAAGATT	AGAAAGATCACTATATATACAAAGAACTATATATACAAAGATACAAGATT	AGAAAGATCACTATATATACAAAGAACTATATATACAAAGATACAAGATT	AGAAAGATCACTATATATACAAAGAACTATATATACAAAGATACAAGATT	AGAAAGATCACTATATATACAAAGAACTATATATACAAAGATACAAGATT	AGAAAGATCACTATATATACAAAGAACTATATATACAAAGATACAAGATT	AGAAAGATCACTATATATACAAAGAACTATATATACAAAGATACAAGATT	AGAAAGATCACTATATATACAAAGAACTATATATACAAAGATACAAGATT
68	ATGCCAGATTGTTAACCGCACATAGGGTTTATGGACTTACGTGTACACAG	AGGCCAGATTGTTAACCGCACATAGGGTTTATGGACTTACGTGTACACAG	AGGCCAGATTGTTAACCGCACATAGGGTTTATAGACTTACGTGTACACAG	AGGCCAGATTGTTAACCGCACATAGAGTTTATAGACTTACGTGTACACAG	AGGCCAGATTGTTAACCGCACATAGAGTTTATAGACTTACGTGTACAAAG	AGGCCAGATTGTTAACCGCACATAGAGTTTATAGACTTACGAGTACAAAG	AGGCCAGATTGTTAACCGCACATAGAGTTTATAGACTTACGATTACAAAG	AGGCCAGATTGTTAACCGCACATAGAGTTTACAGACTTACGATTACAAAG	AGGCCAGATTGTTAACTGCACATAGAGTTTACAGACTTACGATTACAAAG	AGGCCAGATTGTTAACTACACATAGAGTTTACAGACTTACGATTACAAAG	AGGCCAGATTGTTAACTACATATAGAGTTTACAGACTTACGATTACAAAG	AGGCCAGATTGTTAACTACATATATAGTTTACAGACTTACGATTACAAAG	AGGCCAGATAGTTAACTACATATATAGTTTACAGACTTACGATTACAAAG	AGGCCAGATAGTTAACTACATATATAATTTACAGACTTACGATTACAAAG	AGGCCAGATAGTTAACTACATATATAATTTACAGACTTACAATTACAAAG	AGGCCAGATAGTTAACTACATATATAATTTACAGACCTACAATTACAAAG	AGGCCAGATAGTTAACTACATATATAATTTACAGAACTACAATTACAAAG	AGGCCAGACAGTTAACTACATATATAATTTACAGAACTACAATTACAAAG	AGGCAAGACAGTTAACTACATATATAATTTACAGAACTACAATTACAAAG	AGACAAGACAGTTAACTACATATATAATTTACAGAACTACAATTACAAAG	AGACAAGACAGTTAACTATATATATAATTTACAGAACTACAATTACAAAG	AGACAAGACAGTAAACTATATATATAATTTACAGAACTACAATTACAAAG	AGACAAGACACTAAACTATATATATAATTTACAGAACTACAATTACAAAG	AGACAAGACACTAAACTATATATATAATCTACAGAACTACAATTACAAAG	AGACAAGACACTAAACTATATATATAATCTACAGAACTACAATTACAAAG	AGACAAGACACTAAACTATATATATAATCTACAGAACTACAATTACAAAG	AGACAAGACACTAAACTATATATATAATCTACAGAACTACAATTACAAAG	AGACAAGACACTAAACTATATATATAATCTACAGAACTACAATTACAAAG	AGACAAGACACTAAACTATATATATAATCTACAGAACTACAATTACAAAG	AGACAAGACACTAAACTATATATATAATCTACAGAACTACAATTACAAAG	AGACAAGACACTAAACTATATATATAATCTACAGAACTACAATTACAAAG	AGACAAGACACTAAACTATATATATAATCTACAGAACTACAATTACAAAG	AGACAAGACACTAAACTATATATATAATCTACAGAACTACAATTACAAAG	AGACAAGACACTAAACTATATATATAATCTACAGAACTACAATTACAAAG	AGACAAGACACTAAACTATATATATAATCTACAGAACTACAATTACAAAG	AGACAAGACACTAAACTATATATATAATCTACAGAACTACAATTACAAAG	AGACAAGACACTAAACTATATATATAATCTACAGAACTACAATTACAAAG	AGACAAGACACTAAACTATATATATAATCTACAGAACTACAATTACAAAG	AGACAAGACACTAAACTATATATATAATCTACAGAACTACAATTACAAAG	AGACAAGACACTAAACTATATATATAATCTACAGAACTACAATTACAAAG	AGACAAGACACTAAACTATATATATAATCTACAGAACTACAATTACAAAG
69	CCAAATGAAAAGAAACGCCAGTGCGTCCCCAACGGTGCGTCAGAATCAAT	CCAAAAGAAAAGAAACGCCAGTGCGTCCCCAACGGTGCGTCAGAATCAAT	CCAAAAGAAAAGAAACGCCAGTGCGTCCCCAACGGTGCGTCAGAATCAAG	CCAAAAGACAAGAAACGCCAGTGCGTCCCCAACGGTGCGTCAGAATCAAG	CCAAAAGACAAGAAACGCCAATGCGTCCCCAACGGTGCGTCAGAATCAAG	CCAAAAGACAAGAAACGCCAATGAGTCCCCAACGGTGCGTCAGAATCAAG	CCAAAAGACAAGAAACGACAATGAGTCCCCAACGGTGCGTCAGAATCAAG	CCAAAAGACAAGAAACTACAATGAGTCCCCAACGGTGCGTCAGAATCAAG	CCAAAAGACAAGAAACTACAATGAGTCCCCAACGGTGCGTCACAATCAAG	CCAAAAGACAAGAAACTACAATGAGTCCCCAACGGTGCGTCACAAGCAAG	CCAAAAGACAAGAAACTACAATGAGTCCCCAACGGTGCGTTACAAGCAAG	TCAAAAGACAAGAAACTACAATGAGTCCCCAACGGTGCGTTACAAGCAAG	TAAAAAGACAAGAAACTACAATGAGTCCCCAACGGTGCGTTACAAGCAAG	TACAAAGACAAGAAACTACAATGAGTCCCCAACGGTGCGTTACAAGCAAG	TACAAAGACAAGAAACTACAATGAGTCCCCAACGCTGCGTTACAAGCAAG	TACAAAGACAAGAAACTACAATGAGTCCCCAACGCTGTGTTACAAGCAAG	TACAAAGACAAGAAACTACAATGAGTCCCCAAGGCTGTGTTACAAGCAAG	TACAAAGACAAGAAACTACAATGAGTACCCAAGGCTGTGTTACAAGCAAG	TACAAAGACAAGAAACTACAATGAGTACACAAGGCTGTGTTACAAGCAAG	TACAAAGACAAGAAACTACAATGAGTACACAAGACTGTGTTACAAGCAAG	TACAAAGACAAGAAACTACAATGAGTAAACAAGACTGTGTTACAAGCAAG	TACAAAGACAAGAAACTACAATGAGTAAACAAGACTGTTTTACAAGCAAG	TACAAAGACAAGAAACTACAATGAGTAAACAAGACTATTTTACAAGCAAG	TACAAAGACAAGAAACTACAATGAGTAAACAAGACTATTATACAAGCAAG	TACAAAGACAAGAAACTACAATGAGTAAACAAGACTACTATACAAGCAAG	TACAAAGACAAGAAACTACAATGACTAAACAAGACTACTATACAAGCAAG	TACAAAGACAAGAAACTACAAAGACTAAACAAGACTACTATACAAGCAAG	TACAAAGACAAGAAACTACAAAGACTATACAAGACTACTATACAAGCAAG	TACAAAGACAAGAAACTACAAAGATTATACAAGACTACTATACAAGCAAG	TACAAAGCCAAGAAACTACAAAGATTATACAAGACTACTATACAAGCAAG	TACAAAGCCAAGAAACTACAAAGATTATACAAGACTACTATACAAGCAAG	TACAAAGCCAAGAAACTACAAAGATTATACAAGACTACTATACAAGCAAG	TACAAAGCCAAGAAACTACAAAGATTATACAAGACTACTATACAAGCAAG	TACAAAGCCAAGAAACTACAAAGATTATACAAGACTACTATACAAGCAAG	TACAAAGCCAAGAAACTACAAAGATTATACAAGACTACTATACAAGCAAG	TACAAAGCCAAGAAACTACAAAGATTATACAAGACTACTATACAAGCAAG	TACAAAGCCAAGAAACTACAAAGATTATACAAGACTACTATACAAGCAAG	TACAAAGCCAAGAAACTACAAAGATTATACAAGACTACTATACAAGCAAG	TACAAAGCCAAGAAACTACAAAGATTATACAAGACTACTATACAAGCAAG	TACAAAGCCAAGAAACTACAAAGATTATACAAGACTACTATACAAGCAAG	TACAAAGCCAAGAAACTACAAAGATTATACAAGACTACTATACAAGCAAG
70	CCTACAAGCATCTGGATGCCGATATGACCAAAACCATCCAATTGTGAGTA	CCTACAAGCATCTGGATGCCGATATGACCAAAACCATCCAATTGAGAGTA	CCTACAAGCATCTGGATACCGATATGACCAAAACCATCCAATTGAGAGTA	CCTACAAGCATCTGGATACCGATATGACCAAGACCATCCAATTGAGAGTA	CCTACAAGCATCTGGATACCGATATGACCAAGACCATCCAATTAAGAGTA	CCTACAAGCATCAGGATACCGATATGACCAAGACCATCCAATTAAGAGTA	CCTACAAGCATCAAGATACCGATATGACCAAGACCATCCAATTAAGAGTA	CCTACAAGCATCAAGATACAGATATGACCAAGACCATCCAATTAAGAGTA	CCTACAAGCATCAAGATACAGATAAGACCAAGACCATCCAATTAAGAGTA	CCTACAAGCATCAAGATACAGACAAGACCAAGACCATCCAATTAAGAGTA	CCTACAAGCATCAAGATACAGACAAGACCAAGACTATCCAATTAAGAGTA	CCTACAAGCATCAAGATACAGACAAGACCAAGACTATCTAATTAAGAGTA	CCTACAAGCATCAAGATACAGACAAGACCAAGACTATTTAATTAAGAGTA	CCTACAAGAATCAAGATACAGACAAGACCAAGACTATTTAATTAAGAGTA	CCTACAAGAATCAAGATACAGACAAGACTAAGACTATTTAATTAAGAGTA	ACTACAAGAATCAAGATACAGACAAGACTAAGACTATTTAATTAAGAGTA	ACTACAAGAATCAAGATACAGACAAGACTAAGACTATTTAAATAAGAGTA	ACTACAAGAATCAAGATACAGACAAGACTAAGACTATTTAAATAAGACTA	ACTACAAGAATCAAGATACAGACAAGACTAAGACTATATAAATAAGACTA	ACTACAAGAATCAAGATACATACAAGACTAAGACTATATAAATAAGACTA	ACTACAAGAATCAAGATATATACAAGACTAAGACTATATAAATAAGACTA	ACTACAAGAATCAAGATATATACAAGACTAAGACTATATAAACAAGACTA	ACTACAAGAATCAAGATATATACAAGACTAAGACTATATAAACAAGAATA	ACTACAAGAATCAAGATATATACAAGACTAAGATTATATAAACAAGAATA	ACTACAAGAATCAAGATATATACAAGACTAAGATTATATAAACAAGAATC	ACTACAAGAAACAAGATATATACAAGACTAAGATTATATAAACAAGAATC	TCTACAAGAAACAAGATATATACAAGACTAAGATTATATAAACAAGAATC	TATACAAGAAACAAGATATATACAAGACTAAGATTATATAAACAAGAATC	TACACAAGAAACAAGATATATACAAGACTAAGATTATATAAACAAGAATC	TACACAAGAAACAAGATATATACAAGACTAAGATTATATAAACAAGAATC	TACACAAGAAACAAGATATATACAAGACTAAGATTATATAAACAAGAATC	TACACAAGAAACAAGATATATACAAGACTAAGATTATATAAACAAGAATC	TACACAAGAAACAAGATATATACAAGACTAAGATTATATAAACAAGAATC	TACACAAGAAACAAGATATATACAAGACTAAGATTATATAAACAAGAATC	TACACAAGAAACAAGATATATACAAGACTAAGATTATATAAACAAGAATC	TACACAAGAAACAAGATATATACAAGACTAAGATTATATAAACAAGAATC	TACACAAGAAACAAGATATATACAAGACTAAGATTATATAAACAAGAATC	TACACAAGAAACAAGATATATACAAGACTAAGATTATATAAACAAGAATC	TACACAAGAAACAAGATATATACAAGACTAAGATTATATAAACAAGAATC	TACACAAGAAACAAGATATATACAAGACTAAGATTATATAAACAAGAATC	TACACAAGAAACAAGATATATACAAGACTAAGATTATATAAACAAGAATC
71	GTTGATATAACGAATCTATCGTCTATGCTAACGGGTTCCATCATCTTGGA	GTTGATATAACGAATCTATCGTCTATACTAACGGGTTCCATCATCTTGGA	GTTGATATAACGAATCTATCGTCTATACTAACGGGTTCCATCATCTAGGA	GTTGATATAACGAATATATCGTCTATACTAACGGGTTCCATCATCTAGGA	GTTGATATAACGAATATATCGTCTATACTAACGGGTTCCATCATCTAAGA	GTTTATATAACGAATATATCGTCTATACTAACGGGTTCCATCATCTAAGA	GTTTATATAACGAATATATCGTCTATACTAACAGGTTCCATCATCTAAGA	GTTTATATAACGAATATATCGTCTATACTAACAGGTTCCATCATCCAAGA	GTTTATATAACGAATATATAGTCTATACTAACAGGTTCCATCATCCAAGA	GTTTATATAACGAATATATAGACTATACTAACAGGTTCCATCATCCAAGA	GTTTATATAACGAATATATAGACTATACAAACAGGTTCCATCATCCAAGA	GTTTATATAACGAATATATAGACTATACAAACAAGTTCCATCATCCAAGA	GTTTATATAACGAATATATAGACTATACAAACAAGTTACATCATCCAAGA	GTTTATATAACGAATATATAAACTATACAAACAAGTTACATCATCCAAGA	GTTTATATAACGAATATATAAACTATACAAACAAGTTACATAATCCAAGA	GTTTATATAACGAATATATAAACTATACAAACAAGTTATATAATCCAAGA	GTTTATATAACGTATATATAAACTATACAAACAAGTTATATAATCCAAGA	GTTTATATAACGTATATATAAACTATACAAACAAGTTATATAATTCAAGA	GTTTATATAAAGTATATATAAACTATACAAACAAGTTATATAATTCAAGA	GTTTATATAAACTATATATAAACTATACAAACAAGTTATATAATTCAAGA	ATTTATATAAACTATATATAAACTATACAAACAAGTTATATAATTCAAGA	ATTTATATAAACTATATATAAACTATACAAACAAGATATATAATTCAAGA	AGTTATATAAACTATATATAAACTATACAAACAAGATATATAATTCAAGA	AGATATATAAACTATATATAAACTATACAAACAAGATATATAATTCAAGA	AGATATATAAACTATATATAAACTATACAAACAAGATATATAATTCAAGA	AGATATATAAACTATATATAAACTATACAAACAAGATATATAATTCAAGA	AGATATATAAACTATATATAAACTATACAAACAAGATATATAATTCAAGA	AGATATATAAACTATATATAAACTATACAAACAAGATATATAATTCAAGA	AGATATATAAACTATATATAAACTATACAAACAAGATATATAATTCAAGA	AGATATATAAACTATATATAAACTATACAAACAAGATATATAATTCAAGA	AGATATATAAACTATATATAAACTATACAAACAAGATATATAATTCAAGA	AGATATATAAACTATATATAAACTATACAAACAAGATATATAATTCAAGA	AGATATATAAACTATATATAAACTATACAAACAAGATATATAATTCAAGA	AGATATATAAACTATATATAAACTATACAAACAAGATATATAATTCAAGA	AGATATATAAACTATATATAAACTATACAAACAAGATATATAATTCAAGA	AGATATATAAACTATATATAAACTATACAAACAAGATATATAATTCAAGA	AGATATATAAACTATATATAAACTATACAAACAAGATATATAATTCAAGA	AGATATATAAACTATATATAAACTATACAAACAAGATATATAATTCAAGA	AGATATATAAACTATATATAAACTATACAAACAAGATATATAATTCAAGA	AGATATATAAACTATATATAAACTATACAAACAAGATATATAATTCAAGA	AGATATATAAACTATATATAAACTATACAAACAAGATATATAATTCAAGA
72	GTCAAGCCCATTACTGGTATAGATCCATCGTAACGCGTGAGGTACCATAC	GTCAAGCCCATTACTGGTATAGATCCATCGTAACGCGTGAGGTACCAAAC	GTCAAGCCCATTACTGGTATAGATCCATCGTAACGAGTGAGGTACCAAAC	GTCAAGCCCATTACTGGTATAGATCCATCGTAACAAGTGAGGTACCAAAC	GTCAAGCCCATTACTGGTAAAGATCCATCGTAACAAGTGAGGTACCAAAC	GTCAAGCCAATTACTGGTAAAGATCCATCGTAACAAGTGAGGTACCAAAC	GTCAAGCCAATTACTGATAAAGATCCATCGTAACAAGTGAGGTACCAAAC	GTCAAGCCAATTACTTATAAAGATCCATCGTAACAAGTGAGGTACCAAAC	GTCAAGCCAATTACTTATAAAGATACATCGTAACAAGTGAGGTACCAAAC	GTCAAGCCAATTACTTATAAAGATACATAGTAACAAGTGAGGTACCAAAC	GTCAAGCCAATTACTTATAAAGATACATACTAACAAGTGAGGTACCAAAC	GTCAAGCCAATTACTTATAAAGATACATACTAACAAGAGAGGTACCAAAC	GTCAAGCCAATTACTTATAAAGATACATACTAACAAGAAAGGTACCAAAC	GTCAAGCCAATTACTTATAAAGATACATACTAACAAGAAAGGTACAAAAC	GTCAAGCCAATTACTTATAAAGATACATACTAACAAGAAAAGTACAAAAC	GTCAAGCCAATTACTTATAAAGTTACATACTAACAAGAAAAGTACAAAAC	GTCAAGCCAATTACTTATAAAGTTACATACTAACAAGAAAAGTACAAAAG	GTCAAGCCAATTACTTATAAAGTTACATACTAACAAGAAAAGTACACAAG	GTCAAGACAATTACTTATAAAGTTACATACTAACAAGAAAAGTACACAAG	GTCAAGACAATTACTTACAAAGTTACATACTAACAAGAAAAGTACACAAG	GTCAAGACAATTATTTACAAAGTTACATACTAACAAGAAAAGTACACAAG	GTCAAGACAATTATTTACAAAGTTACATACTTACAAGAAAAGTACACAAG	GTCAAGACAATTATTTACAAAGTTACATACATACAAGAAAAGTACACAAG	GTCAAGACAAATATTTACAAAGTTACATACATACAAGAAAAGTACACAAG	GTCAAGACAAATATTTACAAAGTTACATATATACAAGAAAAGTACACAAG	GTCAAGACAAATATTTACAAAGTTACATATATACAAGAAAAGTATACAAG	GTCAAGACAAATATTTACAAAGTTACATATATACAAGAAAAGTATACAAG	GTCAAGACAAATATTTACAAAGTTACATATATACAAGAAAAGTATACAAG	GTCAAGACAAATATTTACAAAGTTACATATATACAAGAAAAGTATACAAG	GTCAAGACAAATATTTACAAAGTTACATATATACAAGAAAAGTATACAAG	GTCAAGACAAATATTTACAAAGTTACATATATACAAGAAAAGTATACAAG	GTCAAGACAAATATTTACAAAGTTACATATATACAAGAAAAGTATACAAG	GTCAAGACAAATATTTACAAAGTTACATATATACAAGAAAAGTATACAAG	GTCAAGACAAATATTTACAAAGTTACATATATACAAGAAAAGTATACAAG	GTCAAGACAAATATTTACAAAGTTACATATATACAAGAAAAGTATACAAG	GTCAAGACAAATATTTACAAAGTTACATATATACAAGAAAAGTATACAAG	GTCAAGACAAATATTTACAAAGTTACATATATACAAGAAAAGTATACAAG	GTCAAGACAAATATTTACAAAGTTACATATATACAAGAAAAGTATACAAG	GTCAAGACAAATATTTACAAAGTTACATATATACAAGAAAAGTATACAAG	GTCAAGACAAATATTTACAAAGTTACATATATACAAGAAAAGTATACAAG	GTCAAGACAAATATTTACAAAGTTACATATATACAAGAAAAGTATACAAG
73	CCAAGACACTAATGATGCAATGCATCAGCACGGCTAAAAACGTCAGCGGT	CCAAGACACTAATGATGCAAGGCATCAGCACGGCTAAAAACGTCAGCGGT	CCAAGACACTAATTATGCAAGGCATCAGCACGGCTAAAAACGTCAGCGGT	CCAAGACACTAATTATGCAAGGCATCAGCACAGCTAAAAACGTCAGCGGT	CCAAGACACTAATTATGCAAGGCATCAGCACAGCTACAAACGTCAGCGGT	CCAAGACACTAATTATGCAAGACATCAGCACAGCTACAAACGTCAGCGGT	CCAAGACACTAATTATGCAAGACATAAGCACAGCTACAAACGTCAGCGGT	CCAAGACACTAATTATACAAGACATAAGCACAGCTACAAACGTCAGCGGT	CCAAGACACTAATTATACAAGACATAAGCACAACTACAAACGTCAGCGGT	CCAAGACACTAATTATACAAGACATAAGCACTACTACAAACGTCAGCGGT	CCAAGACACTAATTATACAAGACATAAGAACTACTACAAACGTCAGCGGT	CCAAGACACTAATTATACAAGACATAAGAACTACTACAAAAGTCAGCGGT	CCAAGACACTAATTATACAAGACATAAGAACTACTACAAAAGTCAGCAGT	TCAAGACACTAATTATACAAGACATAAGAACTACTACAAAAGTCAGCAGT	TCAAGACACTAATTATACAAGACATAAGAACTACTACAAAAGACAGCAGT	TCAAGACACTAATTATACAAGACATAAGAACTACTACAAAAGACAGAAGT	TCAAGACACTAATTATACAAGACATAAGAACTACTACAAAAGACAGAATT	TCAAGACACTAATTATACAAGACATAAGAACTACTACAAAAGACAGAATG	TCAAGACACTAATTATACAAGACATAAGAACTACTACAAAAGACAAAATG	TCAAGACACTAATTATACAAGACATAAGAACTACTACAAAAGACAAGATG	TCAAGACACTAATTATACAAGACATAAGAATTACTACAAAAGACAAGATG	TCAAGACACTAATTATACAAGACATAAGATTTACTACAAAAGACAAGATG	TCAAGACACTAATTTTACAAGACATAAGATTTACTACAAAAGACAAGATG	TCAAGACACTAATTTTACAAGACATAAGATTTACTACAAAAGACAAGATG	TCAAGACACTAATTTTACAAGACATAAGATTTACTACAAAAGACAAGATG	TCAAGACACTAATTTTACAAGACATAAGATTTACTACAAAAGACAAGATG	TCAAGACACTAATTTTACAAGACATAAGATTTACTACAAAAGACAAGATG	TCAAGACACTAATTTTACAAGACATAAGATTTACTACAAAAGACAAGATG	TCAAGACACTAATTTTACAAGACATAAGATTTACTACAAAAGACAAGATG	TCAAGACACTAATTTTACAAGACATAAGATTTACTACAAAAGACAAGATG	TCAAGACACTAATTTTACAAGACATAAGATTTACTACAAAAGACAAGATG	TCAAGACACTAATTTTACAAGACATAAGATTTACTACAAAAGACAAGATG	TCAAGACACTAATTTTACAAGACATAAGATTTACTACAAAAGACAAGATG	TCAAGACACTAATTTTACAAGACATAAGATTTACTACAAAAGACAAGATG	TCAAGACACTAATTTTACAAGACATAAGATTTACTACAAAAGACAAGATG	TCAAGACACTAATTTTACAAGACATAAGATTTACTACAAAAGACAAGATG	TCAAGACACTAATTTTACAAGACATAAGATTTACTACAAAAGACAAGATG	TCAAGACACTAATTTTACAAGACATAAGATTTACTACAAAAGACAAGATG	TCAAGACACTAATTTTACAAGACATAAGATTTACTACAAAAGACAAGATG	TCAAGACACTAATTTTACAAGACATAAGATTTACTACAAAAGACAAGATG	TCAAGACACTAATTTTACAAGACATAAGATTTACTACAAAAGACAAGATG
74	CCCACATTGTCGGTACACAGCGGTGTTCAAGGGTCGGAGATGCTCGGAGC	CCCACATTGTCGGTACACAGCGGTGTTCAAGGGTCGGAGATACTCGGAGC	CCCACATTGTCGGTACACAGCGGTGTTCAAGAGTCGGAGATACTCGGAGC	CCCACATTGTCGGTACACAGCGGTGTTCAAGAGTCGAAGATACTCGGAGC	CCCACATTGTCGGTACACAGCGGTGTTCAAGAGTCGAAGATACTAGGAGC	CCCACATTGTCGGTACACAGCAGTGTTCAAGAGTCGAAGATACTAGGAGC	CCCACATTGTCGGTACACAGCAGTGTTCAAGAGTCGAAGATACTACGAGC	CCCACATTGTCGGTACACAGCAGTGTTCAAGAGTCGAAGATACTACAAGC	CCCACATTGTCAGTACACAGCAGTGTTCAAGAGTCGAAGATACTACAAGC	CCCACATTGTCAGTACACAGCAGTGTTCAAGAGTCGAAGATACTACAAAC	CCCACATTGTCAGTACACAGCAGTGTTCAAGAGTCGAAGATACTACAAAG	CCCACATTGTCAGTACACAGCAGTATTCAAGAGTCGAAGATACTACAAAG	CCCACATTGTCAGTACACAGCAGTATTCAAGAGTCAAAGATACTACAAAG	CCCAGATTGTCAGTACACAGCAGTATTCAAGAGTCAAAGATACTACAAAG	CCCAGATTGTCATTACACAGCAGTATTCAAGAGTCAAAGATACTACAAAG	CCCAGATTGTCATTACACAGCAGAATTCAAGAGTCAAAGATACTACAAAG	CCCAGATTGTCATTACACAGAAGAATTCAAGAGTCAAAGATACTACAAAG	CCAAGATTGTCATTACACAGAAGAATTCAAGAGTCAAAGATACTACAAAG	CCAAGATTGTCATTATACAGAAGAATTCAAGAGTCAAAGATACTACAAAG	CCAAGATTGTCATTATACAAAAGAATTCAAGAGTCAAAGATACTACAAAG	TCAAGATTGTCATTATACAAAAGAATTCAAGAGTCAAAGATACTACAAAG	TCAAGATTGTCATTATACAAAAGAATTCAAGACTCAAAGATACTACAAAG	TCAAGATTGTCATTATACAAAAGAATTCAAGACACAAAGATACTACAAAG	TCAAGATTGTCATTATACAAGAGAATTCAAGACACAAAGATACTACAAAG	TCAAGATTGTCATTATACAAGAAAATTCAAGACACAAAGATACTACAAAG	TCAAGATTGTCATTATACAAGAAAAGTCAAGACACAAAGATACTACAAAG	TCAAGATTGTCATTATACAAGAAAAGTCAAGACACAAAGATACTACAAAG	TCAAGATTGTCATTATACAAGAAAAGTCAAGACACAAAGATACTACAAAG	TCAAGATTGTCATTATACAAGAAAAGTCAAGACACAAAGATACTACAAAG	TCAAGATTGTCATTATACAAGAAAAGTCAAGACACAAAGATACTACAAAG	TCAAGATTGTCATTATACAAGAAAAGTCAAGACACAAAGATACTACAAAG	TCAAGATTGTCATTATACAAGAAAAGTCAAGACACAAAGATACTACAAAG	TCAAGATTGTCATTATACAAGAAAAGTCAAGACACAAAGATACTACAAAG	TCAAGATTGTCATTATACAAGAAAAGTCAAGACACAAAGATACTACAAAG	TCAAGATTGTCATTATACAAGAAAAGTCAAGACACAAAGATACTACAAAG	TCAAGATTGTCATTATACAAGAAAAGTCAAGACACAAAGATACTACAAAG	TCAAGATTGTCATTATACAAGAAAAGTCAAGACACAAAGATACTACAAAG	TCAAGATTGTCATTATACAAGAAAAGTCAAGACACAAAGATACTACAAAG	TCAAGATTGTCATTATACAAGAAAAGTCAAGACACAAAGATACTACAAAG	TCAAGATTGTCATTATACAAGAAAAGTCAAGACACAAAGATACTACAAAG	TCAAGATTGTCATTATACAAGAAAAGTCAAGACACAAAGATACTACAAAG
75	CGCTAAGAGTGAAGTCGATCTTGCGGTCTCACAGCATGGAGACACAATAT	CGCTAAGAGTGAAGTCGATCTTGCGGTCTCACAGCATGGAGACACAAGAT	CGCTAAGAGTGAAGTCGATCTTGCGGTCTCACAGCAAGGAGACACAAGAT	CGCTAAGAGTGAAGTCGATCTTGCGGTCTCACAGCAAGAAGACACAAGAT	CGCTAAGAGTGAAGTCGATGTTGCGGTCTCACAGCAAGAAGACACAAGAT	CGCTAAGAGTTAAGTCGATGTTGCGGTCTCACAGCAAGAAGACACAAGAT	CGCTAAGAGTTAAGACGATGTTGCGGTCTCACAGCAAGAAGACACAAGAT	CGCTAAGAGTTAAGACGATGTTGAGGTCTCACAGCAAGAAGACACAAGAT	CGCTAAGAGTTAAGACGATGTTGAAGTCTCACAGCAAGAAGACACAAGAT	CGCTAAGAGTTAAGACGATGATGAAGTCTCACAGCAAGAAGACACAAGAT	CGCTAAGAGTTAAGACGATGATGAAGTCTCAAAGCAAGAAGACACAAGAT	CGCTAAGAGTTAAGACGATGATGAAGTCACAAAGCAAGAAGACACAAGAT	CGCTAAGAGTTAAGACGATGATGAAGTTACAAAGCAAGAAGACACAAGAT	AGCTAAGAGTTAAGACGATGATGAAGTTACAAAGCAAGAAGACACAAGAT	AGATAAGAGTTAAGACGATGATGAAGTTACAAAGCAAGAAGACACAAGAT	AGACAAGAGTTAAGACGATGATGAAGTTACAAAGCAAGAAGACACAAGAT	AGACAAGAATTAAGACGATGATGAAGTTACAAAGCAAGAAGACACAAGAT	AGACAAGAATTAAGATGATGATGAAGTTACAAAGCAAGAAGACACAAGAT	AGACAAGAATTAAGATGATGATGAAGTTACAAAGCAAGAAGACACAAGAA	AGACAAGAATTAAGATGATGATGAAGTTACAAAGCAAGAAGAGACAAGAA	AGACAAGAATTAAGATGATGATGAAGTTACAAAGCAAGAACAGACAAGAA	AGACAAGAATTAAGATGAAGATGAAGTTACAAAGCAAGAACAGACAAGAA	AGACAAGAATTAAGATGAATATGAAGTTACAAAGCAAGAACAGACAAGAA	AGACAAGAATTAAGATGAATATGAAGTTACATAGCAAGAACAGACAAGAA	AGACAAGAATTAAGATGAATATGAAGTTATATAGCAAGAACAGACAAGAA	AGACAAGAACTAAGATGAATATGAAGTTATATAGCAAGAACAGACAAGAA	AGACAAGAACTAAGATTAATATGAAGTTATATAGCAAGAACAGACAAGAA	AGACAAGAACTAAGATTAATATGAAGTTATATAGCAAGAACAGACAAGAA	AGACAAGAACTAAGATTAATATGAAGTTATATAGCAAGAACAGACAAGAA	AGACAAGAACTAAGATTAATATGAAGTTATATAGCAAGAACAGACAAGAA	AGACAAGAACTAAGATTAATATGAAGTTATATAGCAAGAACAGACAAGAA	AGACAAGAACTAAGATTAATATGAAGTTATATAGCAAGAACAGACAAGAA	AGACAAGAACTAAGATTAATATGAAGTTATATAGCAAGAACAGACAAGAA	AGACAAGAACTAAGATTAATATGAAGTTATATAGCAAGAACAGACAAGAA	AGACAAGAACTAAGATTAATATGAAGTTATATAGCAAGAACAGACAAGAA	AGACAAGAACTAAGATTAATATGAAGTTATATAGCAAGAACAGACAAGAA	AGACAAGAACTAAGATTAATATGAAGTTATATAGCAAGAACAGACAAGAA	AGACAAGAACTAAGATTAATATGAAGTTATATAGCAAGAACAGACAAGAA	AGACAAGAACTAAGATTAATATGAAGTTATATAGCAAGAACAGACAAGAA	AGACAAGAACTAAGATTAATATGAAGTTATATAGCAAGAACAGACAAGAA	AGACAAGAACTAAGATTAATATGAAGTTATATAGCAAGAACAGACAAGAA
76	CGACGACTAGTGCAAGTGACACGTGAAGATTTTTGTGCACGTTCTTAACT	CGACGACTAGTGCAAGAGACACGTGAAGATTTTTGTGCACGTTCTTAACT	CTACGACTAGTGCAAGAGACACGTGAAGATTTTTGTGCACGTTCTTAACT	CTACGACTAGTGCAAGAGACACGTGAAGATTTTTGTGCACGTACTTAACT	CTACGACTAGTGCAAGAGACAAGTGAAGATTTTTGTGCACGTACTTAACT	CTACGACTAGTGCAAGAGACAAGTGAAGATTTTTGTACACGTACTTAACT	CTACGACTAGTGCAAGAGACAAGTGAAGATTTTTATACACGTACTTAACT	CTACGACTAGTGCAAGAGACAAGTCAAGATTTTTATACACGTACTTAACT	CTACGACTAGTGCAAGAGACAAGTCAAGATTTATATACACGTACTTAACT	CTACGACTAGTGCAAGAGACAAGACAAGATTTATATACACGTACTTAACT	CTACGACTAGTGCAAGAGACAAGACAAGATTTATATACAAGTACTTAACT	CTACGACTAGTGCAAGAGACAAGACAAGATTTATATACAAGTATTTAACT	CTACGACTAGTGCAAGAGACAAGACAAGAATTATATACAAGTATTTAACT	CTACGACAAGTGCAAGAGACAAGACAAGAATTATATACAAGTATTTAACT	CTACTACAAGTGCAAGAGACAAGACAAGAATTATATACAAGTATTTAACT	TTACTACAAGTGCAAGAGACAAGACAAGAATTATATACAAGTATTTAACT	TTACTACAAGTGCAAGAGACAAGACAAGAATTATATACAACTATTTAACT	TTACTACAAGTGCAAGAGACAAGACAAGAATTATATACAACTATATAACT	TTACTACAAGTGCAAGAGACAAGACAAGAATTATATACAACTATATAAAT	TTACTACAAGTGCAAGACACAAGACAAGAATTATATACAACTATATAAAT	TTACTACAAGTGCAAGACACAAGACAAGAATTATATACAACTATATAAAG	TTACTACAAGTGCAAGACTCAAGACAAGAATTATATACAACTATATAAAG	TTACTACAAGAGCAAGACTCAAGACAAGAATTATATACAACTATATAAAG	TTCCTACAAGAGCAAGACTCAAGACAAGAATTATATACAACTATATAAAG	GTCCTACAAGAGCAAGACTCAAGACAAGAATTATATACAACTATATAAAG	GTCCTACAAGAACAAGACTCAAGACAAGAATTATATACAACTATATAAAG	GTCCTACAAGAACAAGAATCAAGACAAGAATTATATACAACTATATAAAG	GTCCTACAAAAACAAGAATCAAGACAAGAATTATATACAACTATATAAAG	GTCCTACAAATACAAGAATCAAGACAAGAATTATATACAACTATATAAAG	GTCCTACAAATACAAGAATCAAGACAAGAATTATATACAACTATATAAAG	GTCCTACAAATACAAGAATCAAGACAAGAATTATATACAACTATATAAAG	GTCCTACAAATACAAGAATCAAGACAAGAATTATATACAACTATATAAAG	GTCCTACAAATACAAGAATCAAGACAAGAATTATATACAACTATATAAAG	GTCCTACAAATACAAGAATCAAGACAAGAATTATATACAACTATATAAAG	GTCCTACAAATACAAGAATCAAGACAAGAATTATATACAACTATATAAAG	GTCCTACAAATACAAGAATCAAGACAAGAATTATATACAACTATATAAAG	GTCCTACAAATACAAGAATCAAGACAAGAATTATATACAACTATATAAAG	GTCCTACAAATACAAGAATCAAGACAAGAATTATATACAACTATATAAAG	GTCCTACAAATACAAGAATCAAGACAAGAATTATATACAACTATATAAAG	GTCCTACAAATACAAGAATCAAGACAAGAATTATATACAACTATATAAAG	GTCCTACAAATACAAGAATCAAGACAAGAATTATATACAACTATATAAAG
77	ATGATCCGTCGTACAAAGCTGGTTTCGACCCCACTTGACATTAGTGTGAC	AAGATCCGTCGTACAAAGCTGGTTTCGACCCCACTTGACATTAGTGTGAC	AAGATCCGTCGTACAAAGCTGATTTCGACCCCACTTGACATTAGTGTGAC	AAGATCCGTCGTACAAAGCTGATTACGACCCCACTTGACATTAGTGTGAC	AAGATCCGTCCTACAAAGCTGATTACGACCCCACTTGACATTAGTGTGAC	AAGATCCGTACTACAAAGCTGATTACGACCCCACTTGACATTAGTGTGAC	AAGATCCGTACTACAAAGCTGATTACGACCCCACTTGACATTAGTGAGAC	AAGATCCGTACTACAAAGCTGATTAAGACCCCACTTGACATTAGTGAGAC	AAGATCCGTACTACAAAGCTGATTAAGACCCCACTTTACATTAGTGAGAC	AAGATCCGTACTACAAAGCTGATTAAGACCCCACTATACATTAGTGAGAC	AAGATCCGTACTACAAAGCTGATTAAGACCCCACTATATATTAGTGAGAC	AAGATCCGTACTACAAATCTGATTAAGACCCCACTATATATTAGTGAGAC	AAGATCCGTACTACAAATCTAATTAAGACCCCACTATATATTAGTGAGAC	AAGATCCGTACTACAAATCTAATTAAGACACCACTATATATTAGTGAGAC	AAGATCCGTACTACAAATCTAATTAAGACACCACTATATATTAGTAAGAC	AAGATCCGTACTACAAATCTAATTAAGACACCACTATATATTACTAAGAC	AAGATCCGTACTACAAATCTAATTAAGACACCACTATATATTACAAAGAC	AAGATCCGTACTACAAATCTAATCAAGACACCACTATATATTACAAAGAC	AAGATCCGTACTACAAATCTAATCAAGACACAACTATATATTACAAAGAC	AAGATCCGTACTACAAATCTAATCAAGACACAACTATATACTACAAAGAC	AAGATCCGTACTACAAATCTAATCAAGACACAACTATATACTACAAAGAT	AAGATCCGTACTACAAATCTAATCAAGATACAACTATATACTACAAAGAT	AAGATCCGTACTACAAATCTAATCAAGATACAACTATTTACTACAAAGAT	AAGATCCGTACTACAAATCTAATCAAGATACAAATATTTACTACAAAGAT	AAGATCCGTACTACAAATCTAAGCAAGATACAAATATTTACTACAAAGAT	AAGATCCGTACTACAAATCTAAGCAAGATACAAATATTTACTACAAAGAT	AAGATCCGTACTACAAATCTAAGCAAGATACAAATATTTACTACAAAGAT	AAGATCCGTACTACAAATCTAAGCAAGATACAAATATTTACTACAAAGAT	AAGATCCGTACTACAAATCTAAGCAAGATACAAATATTTACTACAAAGAT	AAGATCCGTACTACAAATCTAAGCAAGATACAAATATTTACTACAAAGAT	AAGATCCGTACTACAAATCTAAGCAAGATACAAATATTTACTACAAAGAT	AAGATCCGTACTACAAATCTAAGCAAGATACAAATATTTACTACAAAGAT	AAGATCCGTACTACAAATCTAAGCAAGATACAAATATTTACTACAAAGAT	AAGATCCGTACTACAAATCTAAGCAAGATACAAATATTTACTACAAAGAT	AAGATCCGTACTACAAATCTAAGCAAGATACAAATATTTACTACAAAGAT	AAGATCCGTACTACAAATCTAAGCAAGATACAAATATTTACTACAAAGAT	AAGATCCGTACTACAAATCTAAGCAAGATACAAATATTTACTACAAAGAT	AAGATCCGTACTACAAATCTAAGCAAGATACAAATATTTACTACAAAGAT	AAGATCCGTACTACAAATCTAAGCAAGATACAAATATTTACTACAAAGAT	AAGATCCGTACTACAAATCTAAGCAAGATACAAATATTTACTACAAAGAT	AAGATCCGTACTACAAATCTAAGCAAGATACAAATATTTACTACAAAGAT
78	TCCTGATATGACCTTGTCCCGAATGAAAGTCCCGTGGTGTTATCTAATGG	TCCTGATATGACCTTGTCCCGAATCAAAGTCCCGTGGTGTTATCTAATGG	TCCTGATATGACCTTGTCCCGAATCAAAGTCCCGTGGTGTTATCTAAAGG	TCCTGATAAGACCTTGTCCCGAATCAAAGTCCCGTGGTGTTATCTAAAGG	TCCTGATAAGACCTTGTCCCGAATCAAAGTCCCGTGGTGTTATCTAAATG	TACTGATAAGACCTTGTCCCGAATCAAAGTCCCGTGGTGTTATCTAAATG	TACAGATAAGACCTTGTCCCGAATCAAAGTCCCGTGGTGTTATCTAAATG	TACAGATAAGACCTAGTCCCGAATCAAAGTCCCGTGGTGTTATCTAAATG	TACAGATAAGACCTAGTCCCGAATCAAAGTCCCGTGGTGTTATCAAAATG	TACAAATAAGACCTAGTCCCGAATCAAAGTCCCGTGGTGTTATCAAAATG	TACAAATAAGACCTAGTCCCGAATCAAAGTCCCGTAGTGTTATCAAAATG	TACAAATAAGACCTAGTCCCGAATCAAAGTCCCGTAGTGTTAACAAAATG	TACAAATAAGACCTAGTCCCGAATCAAAGTCCCGTAGTGTTAACAAGATG	TACAAATAAGACCTAGTCCCGAATTAAAGTCCCGTAGTGTTAACAAGATG	TACAAATAAGACCTAGTCCCGAATTAAAGTCCCATAGTGTTAACAAGATG	TACAAATAAGACCTAGTCCCGAATTAAAGTCCTATAGTGTTAACAAGATG	TACAAATAAGACCTAGTCCCGAATTAAAGTCCTATAGTGATAACAAGATG	TACAAATAAGACCTAGTCCCGAATTAAAGTCCTACAGTGATAACAAGATG	TACAAATAAGACCTAGTCCCGAATTAAAGTCCTACAGTGATTACAAGATG	TACAAATAAGACCTAGTCCCGAATTAAAGTCCTACAGTGACTACAAGATG	TACAAATAAGACCTAGTCCCGAATTAAAGTCCTACATTGACTACAAGATG	TACAAATAAGACCTAGTCCCGAATTAAAGTCCTACATTTACTACAAGATG	TACAAATAAGACCTAGTCCCGAATTAAAGTCCTACAATTACTACAAGATG	TACAAATAAGACCTAGTCCCGAATTAAAGTCCTACAACTACTACAAGATG	TACAAATAAGACCTAGACCCGAATTAAAGTCCTACAACTACTACAAGATG	TACAAATAAGACCTAGAACCGAATTAAAGTCCTACAACTACTACAAGATG	TACAAATAAGAACTAGAACCGAATTAAAGTCCTACAACTACTACAAGATG	TACAAATAAGAACTAAAACCGAATTAAAGTCCTACAACTACTACAAGATG	TACAAATAAGAACTAAAACCGATTTAAAGTCCTACAACTACTACAAGATG	TACAAATAAGAACTAAAACCGATATAAAGTCCTACAACTACTACAAGATG	TACAAATAAGAACTAAAACCGTTATAAAGTCCTACAACTACTACAAGATG	TACAAATAAGAACTAAAACCGTTATAAAGTCCTACAACTACTACAAGATG	TACAAATAAGAACTAAAACCGTTATAAAGTCCTACAACTACTACAAGATG	TACAAATAAGAACTAAAACCGTTATAAAGTCCTACAACTACTACAAGATG	TACAAATAAGAACTAAAACCGTTATAAAGTCCTACAACTACTACAAGATG	TACAAATAAGAACTAAAACCGTTATAAAGTCCTACAACTACTACAAGATG	TACAAATAAGAACTAAAACCGTTATAAAGTCCTACAACTACTACAAGATG	TACAAATAAGAACTAAAACCGTTATAAAGTCCTACAACTACTACAAGATG	TACAAATAAGAACTAAAACCGTTATAAAGTCCTACAACTACTACAAGATG	TACAAATAAGAACTAAAACCGTTATAAAGTCCTACAACTACTACAAGATG	TACAAATAAGAACTAAAACCGTTATAAAGTCCTACAACTACTACAAGATG
79	ATTTCGACCTGATACCAGTGATTGTGTTCCAATCGTACGGCAAGGGATTC	ATTTCGACCTGATACCAGTGATTGTGTTCCAATCGTACGGCAAGAGATTC	ATTTCGACCTGATACCAGTGATTGTGTTACAATCGTACGGCAAGAGATTC	ATTTCGACCTGATACCAGTGATTGTGTTACAATCGTACGACAAGAGATTC	ATTTCGACCTGATACCAGTGATTGTGTTACAATCGTACGACAAGAGAGTC	ATTTCGACCTGATACCAGTGATGGTGTTACAATCGTACGACAAGAGAGTC	ATTTCGACCTGATACAAGTGATGGTGTTACAATCGTACGACAAGAGAGTC	ATTTCGACCTGATACAAGTGATGTTGTTACAATCGTACGACAAGAGAGTC	ATTTCGACCTTATACAAGTGATGTTGTTACAATCGTACGACAAGAGAGTC	ATTTCGACCTTATACAAGAGATGTTGTTACAATCGTACGACAAGAGAGTC	ATTTCGACCTTATACAAGAGATGTTGTTACAATCCTACGACAAGAGAGTC	ATTTCGACTTTATACAAGAGATGTTGTTACAATCCTACGACAAGAGAGTC	ATTTCGACTATATACAAGAGATGTTGTTACAATCCTACGACAAGAGAGTC	ATTTCGACTATATACAAGAGATGTTGTTACAATCCTACTACAAGAGAGTC	ATTTCGACTATATACAAGAGATGTTGTTACAATCCTACTACAAGACAGTC	ATTTCGACTATATACAAGAGATGTTGTTACAATCCTACTACAAGACAGTT	ATTTCGACTATATACAAGAGATGTTTTTACAATCCTACTACAAGACAGTT	ATTTCGACTATATACAAGAGATGTTTCTACAATCCTACTACAAGACAGTT	ATTTAGACTATATACAAGAGATGTTTCTACAATCCTACTACAAGACAGTT	ATATAGACTATATACAAGAGATGTTTCTACAATCCTACTACAAGACAGTT	AGATAGACTATATACAAGAGATGTTTCTACAATCCTACTACAAGACAGTT	AGATAAACTATATACAAGAGATGTTTCTACAATCCTACTACAAGACAGTT	AGATAAACTATATACAAGAAATGTTTCTACAATCCTACTACAAGACAGTT	AGACAAACTATATACAAGAAATGTTTCTACAATCCTACTACAAGACAGTT	AGACAAACTATATACAAGAAATGTTTCTACAATCCTACTACAAGACAGTT	AGACAAACTATATACAAGAAATGTTTCTACAATCCTACTACAAGACAGTT	AGACAAACTATATACAAGAAATGTTTCTACAATCCTACTACAAGACAGTT	AGACAAACTATATACAAGAAATGTTTCTACAATCCTACTACAAGACAGTT	AGACAAACTATATACAAGAAATGTTTCTACAATCCTACTACAAGACAGTT	AGACAAACTATATACAAGAAATGTTTCTACAATCCTACTACAAGACAGTT	AGACAAACTATATACAAGAAATGTTTCTACAATCCTACTACAAGACAGTT	AGACAAACTATATACAAGAAATGTTTCTACAATCCTACTACAAGACAGTT	AGACAAACTATATACAAGAAATGTTTCTACAATCCTACTACAAGACAGTT	AGACAAACTATATACAAGAAATGTTTCTACAATCCTACTACAAGACAGTT	AGACAAACTATATACAAGAAATGTTTCTACAATCCTACTACAAGACAGTT	AGACAAACTATATACAAGAAATGTTTCTACAATCCTACTACAAGACAGTT	AGACAAACTATATACAAGAAATGTTTCTACAATCCTACTACAAGACAGTT	AGACAAACTATATACAAGAAATGTTTCTACAATCCTACTACAAGACAGTT	AGACAAACTATATACAAGAAATGTTTCTACAATCCTACTACAAGACAGTT	AGACAAACTATATACAAGAAATGTTTCTACAATCCTACTACAAGACAGTT	AGACAAACTATATACAAGAAATGTTTCTACAATCCTACTACAAGACAGTT
80	GCCCTCATTCGTTAGCATGCGACCTATAAGGCCGTGATGGGGATCATGAA	GCCCTCATTCGTTAGCATGCGACCTATAAGGCCGTGATGGGGATCATAAA	GCCCTCATTCGTTAGCATGCGACCTATGAGGCCGTGATGGGGATCATAAA	ACCCTCATTCGTTAGCATGCGACCTATGAGGCCGTGATGGGGATCATAAA	ACCCTCATTCGTCAGCATGCGACCTATGAGGCCGTGATGGGGATCATAAA	ACCCTCATTCGTCAGCATGCGACCTATGAGGCCGTTATGGGGATCATAAA	ACCCTCATTCGTCAGCATGCGACCTATGAGGCCTTTATGGGGATCATAAA	ACCCTCATTCGTCAGCATGCGACCTATCAGGCCTTTATGGGGATCATAAA	ACCCTCATTCGTCAGAATGCGACCTATCAGGCCTTTATGGGGATCATAAA	ACCCTCATTCGTCAGAATGCGACCTATCAGGCCTTTATGGGGATAATAAA	ACCCTCATTCGTCAGAATTCGACCTATCAGGCCTTTATGGGGATAATAAA	ACCCTCATTCGTCAGAATTCGACCTATCAGGCCTTTATAGGGATAATAAA	ACCCTCATTCGTCAGAATTCGACCTATCAGGCCTTTATAGAGATAATAAA	ACCCTCATTCGTCAGAATTCGACCTATCAGGCCTTTATATAGATAATAAA	ACCCTCATTCGTCAGAATTCGACCTATCAGGCCTTTATATAGATAATAAG	ACCCTCATTCGTCAGAATTCGACCTATCAAGCCTTTATATAGATAATAAG	ACCCTCATTCGTCAGAATTCGACCTATCAAGACTTTATATAGATAATAAG	ACCCTCATTCGTCAGAATTCGACCTATCAAGACTATATATAGATAATAAG	TCCCTCATTCGTCAGAATTCGACCTATCAAGACTATATATAGATAATAAG	TCCCTCATTCGTCAGAATTAGACCTATCAAGACTATATATAGATAATAAG	TCCCTCATTCGTCAGAATAAGACCTATCAAGACTATATATAGATAATAAG	TCCCTCATTAGTCAGAATAAGACCTATCAAGACTATATATAGATAATAAG	TCCCTCATTAGTCAGAATAAGACCTATCAAGACTATATATAAATAATAAG	TCCCTCATTAGTCAGAATAAGACCTATCAAGACTATATATAAATTATAAG	TCCCTCATTAGTCAGAATAAGACCTATCAAGACTATATATAAATTACAAG	TCCCTCAATAGTCAGAATAAGACCTATCAAGACTATATATAAATTACAAG	TCCCTCAAGAGTCAGAATAAGACCTATCAAGACTATATATAAATTACAAG	TCCCTCAAGATTCAGAATAAGACCTATCAAGACTATATATAAATTACAAG	TCCCTCAAGATTCAGTATAAGACCTATCAAGACTATATATAAATTACAAG	TCCCTCAAGATTCACTATAAGACCTATCAAGACTATATATAAATTACAAG	TCCCTCAAGATTCACTACAAGACCTATCAAGACTATATATAAATTACAAG	TCCCTCAAGATTTACTACAAGACCTATCAAGACTATATATAAATTACAAG	TCCCTCAAGATTTACTACAAGAACTATCAAGACTATATATAAATTACAAG	TCCATCAAGATTTACTACAAGAACTATCAAGACTATATATAAATTACAAG	TCCATCAAGATTTACTACAAGAACTATAAAGACTATATATAAATTACAAG	TCCATCAAGATTTACTACAAGAACTACAAAGACTATATATAAATTACAAG	TCCATCAAGATTTACTACAAGAACTACAAAGACTATATATAAACTACAAG	TCCATCAAGATTTACTACAAGAACTACAAAGACTATATATAAACTACAAG	TCCATCAAGATTTACTACAAGAACTACAAAGACTATATATAAACTACAAG	TCCATCAAGATTTACTACAAGAACTACAAAGACTATATATAAACTACAAG	TCCATCAAGATTTACTACAAGAACTACAAAGACTATATATAAACTACAAG
81	AGACCGTAACGACTAACAATAAACAACTTTCTTGTTGACAGACTACTCGA	AGACCGTAACGACTAACAATAAACAACTTTCTTGTTGACAGACTACTAGA	AGACCGTAACGACTAACAAGAAACAACTTTCTTGTTGACAGACTACTAGA	AGACCGTAACGACTAACAAGAAACAACTTTCTTGTTGACAGACTACAAGA	AGACCGTAACGACTAACAAGAAACAACTTTATTGTTGACAGACTACAAGA	AGACAGTAACGACTAACAAGAAACAACTTTATTGTTGACAGACTACAAGA	AGACAGTTACGACTAACAAGAAACAACTTTATTGTTGACAGACTACAAGA	AGACAGTTACGACTAACAAGAAACAACTATATTGTTGACAGACTACAAGA	AGACAGTTACGACTAACAAGAAACAACTATATAGTTGACAGACTACAAGA	AGACAGTTACTACTAACAAGAAACAACTATATAGTTGACAGACTACAAGA	AGACAGTTACTACAAACAAGAAACAACTATATAGTTGACAGACTACAAGA	AGACAGTTACTACAAACAAGAAACAACTATATAGTTTACAGACTACAAGA	AGACAGTTACTACAAACAAGAAACAACTATATAGTTTACAAACTACAAGA	AGACAGTTACTACAAACAAGAAACAACTATATAATTTACAAACTACAAGA	AGACAGTTACTACAAACAAGAAAAAACTATATAATTTACAAACTACAAGA	AGAAAGTTACTACAAACAAGAAAAAACTATATAATTTACAAACTACAAGA	AGAAAGTTACTACAAACAAGAAAAAACTATATAAATTACAAACTACAAGA	AGAAAGTTACTACAAACAAGAAAAAACTATATAAATTACAAACTATAAGA	AGAAAGTTACTACAAACAAGAAAAAACTATATAAATTACATACTATAAGA	AGAAAGTTACTACAAACAAGAAAAAACTATATAAATTATATACTATAAGA	AGAAAGTTACTACAAACAAGAAAAAACTATATAAACTATATACTATAAGA	AGAAAGTTACTACAAACAAGAAAAAACTATATAAACTATTTACTATAAGA	AGAAAGTCACTACAAACAAGAAAAAACTATATAAACTATTTACTATAAGA	AGAAAGTCACTACAGACAAGAAAAAACTATATAAACTATTTACTATAAGA	AGAAAGACACTACAGACAAGAAAAAACTATATAAACTATTTACTATAAGA	AGAAAGACACTACAGACAAGAAAAAACTATATAAACTATTTACTATAAGA	AGAAAGACACTACAGACAAGAAAAAACTATATAAACTATTTACTATAAGA	AGAAAGACACTACAGACAAGAAAAAACTATATAAACTATTTACTATAAGA	AGAAAGACACTACAGACAAGAAAAAACTATATAAACTATTTACTATAAGA	AGAAAGACACTACAGACAAGAAAAAACTATATAAACTATTTACTATAAGA	AGAAAGACACTACAGACAAGAAAAAACTATATAAACTATTTACTATAAGA	AGAAAGACACTACAGACAAGAAAAAACTATATAAACTATTTACTATAAGA	AGAAAGACACTACAGACAAGAAAAAACTATATAAACTATTTACTATAAGA	AGAAAGACACTACAGACAAGAAAAAACTATATAAACTATTTACTATAAGA	AGAAAGACACTACAGACAAGAAAAAACTATATAAACTATTTACTATAAGA	AGAAAGACACTACAGACAAGAAAAAACTATATAAACTATTTACTATAAGA	AGAAAGACACTACAGACAAGAAAAAACTATATAAACTATTTACTATAAGA	AGAAAGACACTACAGACAAGAAAAAACTATATAAACTATTTACTATAAGA	AGAAAGACACTACAGACAAGAAAAAACTATATAAACTATTTACTATAAGA	AGAAAGACACTACAGACAAGAAAAAACTATATAAACTATTTACTATAAGA	AGAAAGACACTACAGACAAGAAAAAACTATATAAACTATTTACTATAAGA
82	GAACCGTAGGGGACCACATTACGGGGAGATGGATTTGGTATAGTAAGGAC	GAACCGTAGGGGACCACATTACGGGGAGATAGATTTGGTATAGTAAGGAC	GAACCGTAGGAGACCACATTACGGGGAGATAGATTTGGTATAGTAAGGAC	GAACCGTAGGAGACCACATTACGGTGAGATAGATTTGGTATAGTAAGGAC	GAACCGTAGGAGACTACATTACGGTGAGATAGATTTGGTATAGTAAGGAC	GAACCGTAGGAGACTACATTACGGTGAGATAGATTTAGTATAGTAAGGAC	GAACCGTACGAGACTACATTACGGTGAGATAGATTTAGTATAGTAAGGAC	GAACCGTACAAGACTACATTACGGTGAGATAGATTTAGTATAGTAAGGAC	GAACCGTACAAGACTACATTACGGTGAGATAGATTTACTATAGTAAGGAC	GAACCGTACAAGACTACATTACGGTGAGAAAGATTTACTATAGTAAGGAC	GAACCGTACAAGACTACATTACGATGAGAAAGATTTACTATAGTAAGGAC	GAACCGTACAAGACTACATTACGATGAGAAAGATTTACTATAGTAAAGAC	GAACCGTACAAGACTACATTACGATGAGAAAGATTTACTATAGTCAAGAC	GAACCGTACAAGACTACATTACGATGAGAAAGATTTACTATAATCAAGAC	GAACCGTACAAGACTACATTACGATGAGAAAGATTTACTATAAACAAGAC	GAAACGTACAAGACTACATTACGATGAGAAAGATTTACTATAAACAAGAC	AAAACGTACAAGACTACATTACGATGAGAAAGATTTACTATAAACAAGAC	AGAACGTACAAGACTACATTACGATGAGAAAGATTTACTATAAACAAGAC	AGAAAGTACAAGACTACATTACGATGAGAAAGATTTACTATAAACAAGAC	AGAAAGTACAAGACTACATAACGATGAGAAAGATTTACTATAAACAAGAC	AGAAAGTTCAAGACTACATAACGATGAGAAAGATTTACTATAAACAAGAC	AGAAAGTTCAAGACTATATAACGATGAGAAAGATTTACTATAAACAAGAC	AGAAAGTTCAAGACTATATAACTATGAGAAAGATTTACTATAAACAAGAC	AGAAAGTTCAAGACTATATAACTATGAGAAAGATTTACTATAAACAAGAC	AGAAAGTTCAAGACTATATAACTATGAGAAAGATTTACTATAAACAAGAC	AGAAAGTTCAAGACTATATAACTATGAGAAAGATTTACTATAAACAAGAC	AGAAAGTTCAAGACTATATAACTATGAGAAAGATTTACTATAAACAAGAC	AGAAAGTTCAAGACTATATAACTATGAGAAAGATTTACTATAAACAAGAC	AGAAAGTTCAAGACTATATAACTATGAGAAAGATTTACTATAAACAAGAC	AGAAAGTTCAAGACTATATAACTATGAGAAAGATTTACTATAAACAAGAC	AGAAAGTTCAAGACTATATAACTATGAGAAAGATTTACTATAAACAAGAC	AGAAAGTTCAAGACTATATAACTATGAGAAAGATTTACTATAAACAAGAC	AGAAAGTTCAAGACTATATAACTATGAGAAAGATTTACTATAAACAAGAC	AGAAAGTTCAAGACTATATAACTATGAGAAAGATTTACTATAAACAAGAC	AGAAAGTTCAAGACTATATAACTATGAGAAAGATTTACTATAAACAAGAC	AGAAAGTTCAAGACTATATAACTATGAGAAAGATTTACTATAAACAAGAC	AGAAAGTTCAAGACTATATAACTATGAGAAAGATTTACTATAAACAAGAC	AGAAAGTTCAAGACTATATAACTATGAGAAAGATTTACTATAAACAAGAC	AGAAAGTTCAAGACTATATAACTATGAGAAAGATTTACTATAAACAAGAC	AGAAAGTTCAAGACTATATAACTATGAGAAAGATTTACTATAAACAAGAC	AGAAAGTTCAAGACTATATAACTATGAGAAAGATTTACTATAAACAAGAC
83	CGTAACCAGTACGCATTAACGCGTACGTCTGGATAGGGCAAATACAATAT	CGTAACCAGTACGCATTAACGCGTACGTCTGGATAGGGCAAATACAAGAT	CGTAACCAGTACGCATTAACGCGTACGTCTGGATAAGGCAAATACAAGAT	CGTAACCAGTACACATTAACGCGTACGTCTGGATAAGGCAAATACAAGAT	CGTAACCAGTACACATTAACGCGTACGTCTGGATAAGACAAATACAAGAT	AGTAACCAGTACACATTAACGCGTACGTCTGGATAAGACAAATACAAGAT	AGTAACCAGTACATATTAACGCGTACGTCTGGATAAGACAAATACAAGAT	AGAAACCAGTACATATTAACGCGTACGTCTGGATAAGACAAATACAAGAT	AGAAACAAGTACATATTAACGCGTACGTCTGGATAAGACAAATACAAGAT	AGAAACAAGTACATATTAACGAGTACGTCTGGATAAGACAAATACAAGAT	AGAAACAAGTACATATTTACGAGTACGTCTGGATAAGACAAATACAAGAT	AGAAACAAGTACATATTTAAGAGTACGTCTGGATAAGACAAATACAAGAT	AGAAACAAGTACATATTTAAGAGTACGTCTGAATAAGACAAATACAAGAT	AGAAACAAGTACATATTTAAGAGTAAGTCTGAATAAGACAAATACAAGAT	AGAAACAAGTACATATTTAAGACTAAGTCTGAATAAGACAAATACAAGAT	AGAAACAAGTACATATTTAAGACTAAGACTGAATAAGACAAATACAAGAT	AGAAACAAGTACATATTTAAGACTAAGACTAAATAAGACAAATACAAGAT	AGAAACAAGTACATATTTAAGACTAAGACTATATAAGACAAATACAAGAT	AGAAACAAGTACATATTTAAGACTAAGACTATACAAGACAAATACAAGAT	AGAAACAAGTACATATATAAGACTAAGACTATACAAGACAAATACAAGAT	AGAATCAAGTACATATATAAGACTAAGACTATACAAGACAAATACAAGAT	AGAATCAAGTACATATATAAGACTAAGATTATACAAGACAAATACAAGAT	AGAATCAAGTATATATATAAGACTAAGATTATACAAGACAAATACAAGAT	AGAATCAAGTATATATATAAGACTAAGATTATACAAGACAAATACAAGAC	AGAATCAAGTATATATATAAGACTAAGATTATACAAGACAATTACAAGAC	AGAATCAAGTATATATATAAGACTAAGATTATACAAGAAAATTACAAGAC	AGAATCAAGTATATATATAAAACTAAGATTATACAAGAAAATTACAAGAC	AGAATCAAGTATCTATATAAAACTAAGATTATACAAGAAAATTACAAGAC	AGAATCAAGTAACTATATAAAACTAAGATTATACAAGAAAATTACAAGAC	AGAATCAAGAAACTATATAAAACTAAGATTATACAAGAAAATTACAAGAC	AGAATCAAGAAGCTATATAAAACTAAGATTATACAAGAAAATTACAAGAC	AGAATCAAGAAGCTATATAAAACTAAGATTATACAAGAAAATTACAAGAC	AGAATCAAGAAGCTATATAAAACTAAGATTATACAAGAAAATTACAAGAC	AGAATCAAGAAGCTATATAAAACTAAGATTATACAAGAAAATTACAAGAC	AGAATCAAGAAGCTATATAAAACTAAGATTATACAAGAAAATTACAAGAC	AGAATCAAGAAGCTATATAAAACTAAGATTATACAAGAAAATTACAAGAC	AGAATCAAGAAGCTATATAAAACTAAGATTATACAAGAAAATTACAAGAC	AGAATCAAGAAGCTATATAAAACTAAGATTATACAAGAAAATTACAAGAC	AGAATCAAGAAGCTATATAAAACTAAGATTATACAAGAAAATTACAAGAC	AGAATCAAGAAGCTATATAAAACTAAGATTATACAAGAAAATTACAAGAC	AGAATCAAGAAGCTATATAAAACTAAGATTATACAAGAAAATTACAAGAC
84	GGAAGAGAAGATAGCACGATCAGTGTTCCGCGGCCTAATCATGTCCTTCC	GGAAGAGAAGATAGCACGATCAGTGTTCCGCGGCCTAATCAAGTCCTTCC	GGAAGAGAAGATAGCACGATCAGTGTTCCGCGGCCTAATCAAGTCCTACC	GGAAGAGAAGATAGCACGATCAGTGTTCCGCGACCTAATCAAGTCCTACC	AGAAGAGAAGATAGCACGATCAGTGTTCCGCGACCTAATCAAGTCCTACC	AGAAGAGAAGATAGCACGATCAGTGTTCCGCGACCTAATCAAGTCCTACA	AGAAGAGAAGATAGCACGATCAGTGTTCCGAGACCTAATCAAGTCCTACA	AGAAGAGAAGATAGCACGATCAGTGTTACGAGACCTAATCAAGTCCTACA	AGAAGACAAGATAGCACGATCAGTGTTACGAGACCTAATCAAGTCCTACA	AGAAGACAAGAAAGCACGATCAGTGTTACGAGACCTAATCAAGTCCTACA	AGAAGACAAGAAAGCAAGATCAGTGTTACGAGACCTAATCAAGTCCTACA	AGAAGACAAGAAAGCAAGATCAGTGTTACGAGAACTAATCAAGTCCTACA	AGAAGACAAGAAAGCAAGATCAGTGTTACAAGAACTAATCAAGTCCTACA	AGAAGACAAGAAAGCAAGATCAGTGTTACAAGAACTAAACAAGTCCTACA	AGAAGACAAGAAAGCAAGATCAGTGTTACAAGAACTACACAAGTCCTACA	AGAAGACAAGAAAGCAAGATCAGTGTTACAAGAACTACACAAGTACTACA	AGAAGACAAGAAAGCAAGAACAGTGTTACAAGAACTACACAAGTACTACA	AGAAGACAAGAAAGCAAGAAAAGTGTTACAAGAACTACACAAGTACTACA	AGAAGACAAGAAAGCAAGAAAAGTATTACAAGAACTACACAAGTACTACA	AGAAGACAAGAAAGCAAGAAAAGTACTACAAGAACTACACAAGTACTACA	AGAAGATAAGAAAGCAAGAAAAGTACTACAAGAACTACACAAGTACTACA	AGAAAATAAGAAAGCAAGAAAAGTACTACAAGAACTACACAAGTACTACA	AGAAAATAAGAAAGCAAGAAAAGTACTACAAGAACTACACAAGAACTACA	AGAAAATACGAAAGCAAGAAAAGTACTACAAGAACTACACAAGAACTACA	AGAAAGTACGAAAGCAAGAAAAGTACTACAAGAACTACACAAGAACTACA	AGAAAGTACAAAAGCAAGAAAAGTACTACAAGAACTACACAAGAACTACA	AGAAACTACAAAAGCAAGAAAAGTACTACAAGAACTACACAAGAACTACA	AGAAACTACAAAAGCAAGAAAAGTACTACAAGTACTACACAAGAACTACA	AGAAACTACAAAAGCAAGAAAAGTACTACAACTACTACACAAGAACTACA	AGAAACTACAAAAGCAAGAAAAGTACTACAACTACTATACAAGAACTACA	AGAAACTACAAAGGCAAGAAAAGTACTACAACTACTATACAAGAACTACA	AGAAACTACAAAGGCAAGAAAAGTACTACAACTACTATACAAGAACTACA	AGAAACTACAAAGGCAAGAAAAGTACTACAACTACTATACAAGAACTACA	AGAAACTACAAAGGCAAGAAAAGTACTACAACTACTATACAAGAACTACA	AGAAACTACAAAGGCAAGAAAAGTACTACAACTACTATACAAGAACTACA	AGAAACTACAAAGGCAAGAAAAGTACTACAACTACTATACAAGAACTACA	AGAAACTACAAAGGCAAGAAAAGTACTACAACTACTATACAAGAACTACA	AGAAACTACAAAGGCAAGAAAAGTACTACAACTACTATACAAGAACTACA	AGAAACTACAAAGGCAAGAAAAGTACTACAACTACTATACAAGAACTACA	AGAAACTACAAAGGCAAGAAAAGTACTACAACTACTATACAAGAACTACA	AGAAACTACAAAGGCAAGAAAAGTACTACAACTACTATACAAGAACTACA
85	TAGGAACGAAAACGAATGGCCTCAGGATAACACCACTATAGAGTGTGAGG	TAGGAACGAAAACGAAAGGCCTCAGGATAACACCACTATAGAGTGTGAGG	TAGGAACGAAAACGAAAGGCCTCAGGATAACACTACTATAGAGTGTGAGG	TAGGAACGAAAACGAAAGGCCTCAAGATAACACTACTATAGAGTGTGAGG	TAGGAACGAAAACGAAAGGCCTCAAGATAACACTACTATAGAGTGTGAAG	TAGGAACGAAAACGAAAGGCCTCAAGATAACACTACTATAGAGTATGAAG	TAGGAACGAAAACGAAAGGCCTCAAGATAACACTACTATAAAGTATGAAG	AAGGAACGAAAACGAAAGGCCTCAAGATAACACTACTATAAAGTATGAAG	AAGGCACGAAAACGAAAGGCCTCAAGATAACACTACTATAAAGTATGAAG	AAGGCAAGAAAACGAAAGGCCTCAAGATAACACTACTATAAAGTATGAAG	AAGGCAAGAAAACTAAAGGCCTCAAGATAACACTACTATAAAGTATGAAG	AAGGCAAGAAAACTAAAGGCCTCAAGATAACACTACTATAAACTATGAAG	AAGGCAAGAAAACTAAAGGCCTCAAGATTACACTACTATAAACTATGAAG	AAGGCAAGAAAACTAAAAGCCTCAAGATTACACTACTATAAACTATGAAG	AAGGCAAGAAAACTACAAGCCTCAAGATTACACTACTATAAACTATGAAG	AAGGCAAGAAAACTACAAGACTCAAGATTACACTACTATAAACTATGAAG	AAGGCAAGAAAACTACAAGAATCAAGATTACACTACTATAAACTATGAAG	AAGGCAAGAAAACTACAAGAATCAAGATTATACTACTATAAACTATGAAG	AAGGCAAGAAAACTACAAGAATCAAGATTATACTACTATAAACTATAAAG	AAGGCAAGAAAACTACAAGAATCAAGATTATACAACTATAAACTATAAAG	AAGGCAAGAAAACTACAAGAATCAAGATTATACAACTATAAACTATAAAG	AAGGCAAGAAAACTACAAGAATCAAGATTATACAACTATAAACTATAAAG	AAGGCAAGAAAACTACAAGAATCAAGATTATACAACTATAAACTATAAAG	AAGGCAAGAAAACTACAAGAATCAAGATTATACAACTATAAACTATAAAG	AAGGCAAGAAAACTACAAGAATCAAGATTATACAACTATAAACTATAAAG	AAGGCAAGAAAACTACAAGAATCAAGATTATACAACTATAAACTATAAAG	AAGGCAAGAAAACTACAAGAATCAAGATTATACAACTATAAACTATAAAG	AAGGCAAGAAAACTACAAGAATCAAGATTATACAACTATAAACTATAAAG	AAGGCAAGAAAACTACAAGAATCAAGATTATACAACTATAAACTATAAAG	AAGGCAAGAAAACTACAAGAATCAAGATTATACAACTATAAACTATAAAG	AAGGCAAGAAAACTACAAGAATCAAGATTATACAACTATAAACTATAAAG	AAGGCAAGAAAACTACAAGAATCAAGATTATACAACTATAAACTATAAAG	AAGGCAAGAAAACTACAAGAATCAAGATTATACAACTATAAACTATAAAG	AAGGCAAGAAAACTACAAGAATCAAGATTATACAACTATAAACTATAAAG	AAGGCAAGAAAACTACAAGAATCAAGATTATACAACTATAAACTATAAAG	AAGGCAAGAAAACTACAAGAATCAAGATTATACAACTATAAACTATAAAG	AAGGCAAGAAAACTACAAGAATCAAGATTATACAACTATAAACTATAAAG	AAGGCAAGAAAACTACAAGAATCAAGATTATACAACTATAAACTATAAAG	AAGGCAAGAAAACTACAAGAATCAAGATTATACAACTATAAACTATAAAG	AAGGCAAGAAAACTACAAGAATCAAGATTATACAACTATAAACTATAAAG	AAGGCAAGAAAACTACAAGAATCAAGATTATACAACTATAAACTATAAAG
86	CCACCTGTACACAGTGGCAGCCGAGTAACTGTCTCCTGCTACCCGTACTC	CCACCTGTACACAGTGGCAGCCGAGTAACTATCTCCTGCTACCCGTACTC	CCACCTGTACACAGTGGCAGCCGAGTAACTATCTACTGCTACCCGTACTC	CCACCTGTACACAGTTGCAGCCGAGTAACTATCTACTGCTACCCGTACTC	CCACCTGTACACAGTTGCAGCCGAGTAACTATCTACTGCTACACGTACTC	CCACCTGTACACAGTTGCAGCCGAGTAACTATCTACTACTACACGTACTC	CCACCTGTACACAGTTGCAGCCGAGTAACTATCTACTACTACAAGTACTC	CCACCTGTACACAGTTGCAGCCGAGTAACTATATACTACTACAAGTACTC	CCACCAGTACACAGTTGCAGCCGAGTAACTATATACTACTACAAGTACTC	CCACCAGTACACAGTTGCAGCCGAGTAACTATATACTACTACAAGTACTG	CCACCAGTACACAGTTACAGCCGAGTAACTATATACTACTACAAGTACTG	CCACCAGTACACAGTTACAGACGAGTAACTATATACTACTACAAGTACTG	CCACCAGTACAAAGTTACAGACGAGTAACTATATACTACTACAAGTACTG	CTACCAGTACAAAGTTACAGACGAGTAACTATATACTACTACAAGTACTG	CTACAAGTACAAAGTTACAGACGAGTAACTATATACTACTACAAGTACTG	CTACAAGTACAAAGTTACAGACAAGTAACTATATACTACTACAAGTACTG	CTACAAGTACAAAGTTACAGACAAGAAACTATATACTACTACAAGTACTG	CTACAAGTACAAAGTTACATACAAGAAACTATATACTACTACAAGTACTG	CTACAAGTACAAAGTTACATACAAGAAACTATATAATACTACAAGTACTG	CTACAAGTACAAAGTTACATACAAGAAACTATATAAAACTACAAGTACTG	CTACAAGTACAAAGTTACATACAAGAAACTATATAAAACTACAAGTACAG	CTACAAGTACAAAGTTACATACAAGAAACTATATAAAACTACAAGTAAAG	CTACAAGTACAAAGTTACATACAAGAAACTATATAAAACTACAAGTCAAG	CTACAAGTACAAAGTTACATACAAGAAACTATATAAAACTACAAGACAAG	CTACAAGTACAAAGTTATATACAAGAAACTATATAAAACTACAAGACAAG	CTACAAGTACAAAGTTATATACAAGAAACTATATAAAACTACAAGACAAG	CTACAAGTACAAAGTTATATACAAGAAACTATATAAAACTACAAGACAAG	CTACAAGTACAAAGTTATATACAAGAAACTATATAAAACTACAAGACAAG	CTACAAGTACAAAGTTATATACAAGAAACTATATAAAACTACAAGACAAG	CTACAAGTACAAAGTTATATACAAGAAACTATATAAAACTACAAGACAAG	CTACAAGTACAAAGTTATATACAAGAAACTATATAAAACTACAAGACAAG	CTACAAGTACAAAGTTATATACAAGAAACTATATAAAACTACAAGACAAG	CTACAAGTACAAAGTTATATACAAGAAACTATATAAAACTACAAGACAAG	CTACAAGTACAAAGTTATATACAAGAAACTATATAAAACTACAAGACAAG	CTACAAGTACAAAGTTATATACAAGAAACTATATAAAACTACAAGACAAG	CTACAAGTACAAAGTTATATACAAGAAACTATATAAAACTACAAGACAAG	CTACAAGTACAAAGTTATATACAAGAAACTATATAAAACTACAAGACAAG	CTACAAGTACAAAGTTATATACAAGAAACTATATAAAACTACAAGACAAG	CTACAAGTACAAAGTTATATACAAGAAACTATATAAAACTACAAGACAAG	CTACAAGTACAAAGTTATATACAAGAAACTATATAAAACTACAAGACAAG	CTACAAGTACAAAGTTATATACAAGAAACTATATAAAACTACAAGACAAG
87	AAGATTGCCTGCGGTAGCAAGTGAGTCTGATCGCGCAAATTGAGAAGGCG	AAGATTGCCTACGGTAGCAAGTGAGTCTGATCGCGCAAATTGAGAAGGCG	AAGATTGCCTACGGTAGCAAGTGAGTCTGATCGCGCAAATTGAGATGGCG	AAGATTGCCTACGGTAGCAAGTGAGTCTGATCGCGCAAATTGAGATGACG	AAGATTACCTACGGTAGCAAGTGAGTCTGATCGCGCAAATTGAGATGACG	AAGATTACCTACAGTAGCAAGTGAGTCTGATCGCGCAAATTGAGATGACG	AAGATTACCTACAGTAGCAAGTGAGTCTGATCGCACAAATTGAGATGACG	AAGATTACCTACAGTAGCAAGTGAGTCTGATCGTACAAATTGAGATGACG	AAGATTACCTACAGTAACAAGTGAGTCTGATCGTACAAATTGAGATGACG	AAGATTACCTACAGTAACAAGTGAGTCTAATCGTACAAATTGAGATGACG	AAGATTACCTACAGTAACAAGTGAGTCTAATCCTACAAATTGAGATGACG	AAGATTACCTACAGTAACAAGTGAGTCTAATACTACAAATTGAGATGACG	AAGATTACCTACAGTAACAAGTGAGTCTAATACTACAAATTAAGATGACG	AAGATTACCTACAGTAACAAGTGAGTCTAATACTACAAATCAAGATGACG	AAGATTACCTACAGTAACAAGAGAGTCTAATACTACAAATCAAGATGACG	AAGATTACCTACAGTTACAAGAGAGTCTAATACTACAAATCAAGATGACG	AAGATTACCTACAGTTACAAGAGAGTCTAATACTACAAGTCAAGATGACG	AAGATTACCTACAGTTACAAGAGAGTCTAAGACTACAAGTCAAGATGACG	AAGATTACCTACAGTTACAAGAGAGACTAAGACTACAAGTCAAGATGACG	AAGATTATCTACAGTTACAAGAGAGACTAAGACTACAAGTCAAGATGACG	AAGATTATCTACAATTACAAGAGAGACTAAGACTACAAGTCAAGATGACG	AAGATTATCTACAATTACAAGACAGACTAAGACTACAAGTCAAGATGACG	AAGATTATCTACAATTACAAGACAGACTAAGACTACAAGACAAGATGACG	AAGATTATCTACAATTACAAGACAGACTAAGACTACAAGACAAGATGAAG	AAAATTATCTACAATTACAAGACAGACTAAGACTACAAGACAAGATGAAG	AGAATTATCTACAATTACAAGACAGACTAAGACTACAAGACAAGATGAAG	AGAATTATCTACAATTACAAGACAGACTAAGACTACAAGACAAGATGAAG	AGAATTATCTACAATTACAAGACAGACTAAGACTACAAGACAAGATGAAG	AGAATTATCTACAATTACAAGACAGACTAAGACTACAAGACAAGATGAAG	AGAATTATCTACAATTACAAGACAGACTAAGACTACAAGACAAGATGAAG	AGAATTATCTACAATTACAAGACAGACTAAGACTACAAGACAAGATGAAG	AGAATTATCTACAATTACAAGACAGACTAAGACTACAAGACAAGATGAAG	AGAATTATCTACAATTACAAGACAGACTAAGACTACAAGACAAGATGAAG	AGAATTATCTACAATTACAAGACAGACTAAGACTACAAGACAAGATGAAG	AGAATTATCTACAATTACAAGACAGACTAAGACTACAAGACAAGATGAAG	AGAATTATCTACAATTACAAGACAGACTAAGACTACAAGACAAGATGAAG	AGAATTATCTACAATTACAAGACAGACTAAGACTACAAGACAAGATGAAG	AGAATTATCTACAATTACAAGACAGACTAAGACTACAAGACAAGATGAAG	AGAATTATCTACAATTACAAGACAGACTAAGACTACAAGACAAGATGAAG	AGAATTATCTACAATTACAAGACAGACTAAGACTACAAGACAAGATGAAG	AGAATTATCTACAATTACAAGACAGACTAAGACTACAAGACAAGATGAAG
88	GGCTACTGAACATTAACGCAGATGCGCCTTAGACAAGCCTGAATGGCGTC	GGCTACTGAACATTAACGCAGATGCGCCTTAGACAAGCATGAATGGCGTC	GGCTACTGAACATTAACGCAGATTCGCCTTAGACAAGCATGAATGGCGTC	GGCTACTGAACATTAACGCAGATTCGCCTTAGACAAGCATGAAAGGCGTC	GGCTACTGAACATTAACGCAGATTCGCCTTACACAAGCATGAAAGGCGTC	GGCTACTGAACATTAACGCAGATTAGCCTTACACAAGCATGAAAGGCGTC	GGCTACTGAACATTAACGCAGATTAGCATTACACAAGCATGAAAGGCGTC	GGCTACTGAACATTAACGCAGATTAGCATTACACAAGCATGACAGGCGTC	GGCTACTGAACATTAACGAAGATTAGCATTACACAAGCATGACAGGCGTC	GGCTACTGAACATTAACTAAGATTAGCATTACACAAGCATGACAGGCGTC	GGCTACTGAACATTAACTAAGATTAACATTACACAAGCATGACAGGCGTC	GGCTACTGAACATTTACTAAGATTAACATTACACAAGCATGACAGGCGTC	GGCTACTGAACAATTACTAAGATTAACATTACACAAGCATGACAGGCGTC	AGCTACTGAACAATTACTAAGATTAACATTACACAAGCATGACAGGCGTC	AGATACTGAACAATTACTAAGATTAACATTACACAAGCATGACAGGCGTC	AGATACTAAACAATTACTAAGATTAACATTACACAAGCATGACAGGCGTC	AGATACTATACAATTACTAAGATTAACATTACACAAGCATGACAGGCGTC	AGAAACTATACAATTACTAAGATTAACATTACACAAGCATGACAGGCGTC	AGAAACTATACAATTACTAAGATTAACATTACACAAGAATGACAGGCGTC	AGAAACTATACAATTACTAAGATTAATATTACACAAGAATGACAGGCGTC	AGAAACTATACAATTACTAAGATTAATATTACACAAGAATGACAGGCGTG	AGAAACTATACAATTACTAAGATTAATATTACACAAGAATGACAGGCGAG	AGAAACTATACAATTACTAAGATTAATATTACACAAGAATGACAGGCAAG	AGAAACTATACAATTACTAAGATTAATATTACACAAGAATTACAGGCAAG	AGAAACTATACAATTACTAAGATTAATATTACACAAGAATTACAGACAAG	AGAAACTATACAATTACTAAGATTAAGATTACACAAGAATTACAGACAAG	AGAAACTATACAATTACTAAGACTAAGATTACACAAGAATTACAGACAAG	AGAAACTATACAATTACTAAGACTAAGATTATACAAGAATTACAGACAAG	AGAAACTATACAATTACTAAGACTAAGATTATACAAGAATTACAGATAAG	AGAAACTATACAATTACTAAGACTAAGATTATACAAGAATTACAGATAAG	AGAAACTATACAATTACTAAGACTAAGATTATACAAGAATTACAGATAAG	AGAAACTATACAATTACTAAGACTAAGATTATACAAGAATTACAGATAAG	AGAAACTATACAATTACTAAGACTAAGATTATACAAGAATTACAGATAAG	AGAAACTATACAATTACTAAGACTAAGATTATACAAGAATTACAGATAAG	AGAAACTATACAATTACTAAGACTAAGATTATACAAGAATTACAGATAAG	AGAAACTATACAATTACTAAGACTAAGATTATACAAGAATTACAGATAAG	AGAAACTATACAATTACTAAGACTAAGATTATACAAGAATTACAGATAAG	AGAAACTATACAATTACTAAGACTAAGATTATACAAGAATTACAGATAAG	AGAAACTATACAATTACTAAGACTAAGATTATACAAGAATTACAGATAAG	AGAAACTATACAATTACTAAGACTAAGATTATACAAGAATTACAGATAAG	AGAAACTATACAATTACTAAGACTAAGATTATACAAGAATTACAGATAAG
89	CAGGGGGGCTACGTGGCACACAATACCATACTGATCTTATTATGTGCTGC	CAGGGAGGCTACGTGGCACACAATACCATACTGATCTTATTATGTGCTGC	CAGGGAGGCTACGTGGCACACAATACCATACTGATCTTATTATGTGCAGC	CAAGGAGGCTACGTGGCACACAATACCATACTGATCTTATTATGTGCAGC	CAAGGAGGCTACGTGGCACACAATACTATACTGATCTTATTATGTGCAGC	CAAGGAGGCTACGTAGCACACAATACTATACTGATCTTATTATGTGCAGC	CAAGGAGGCTACGTAGCACACACTACTATACTGATCTTATTATGTGCAGC	CAAGGAGACTACGTAGCACACACTACTATACTGATCTTATTATGTGCAGC	CAAGGAGACTACATAGCACACACTACTATACTGATCTTATTATGTGCAGC	CAAGGAGACTACATAGCAAACACTACTATACTGATCTTATTATGTGCAGC	CAAGGAAACTACATAGCAAACACTACTATACTGATCTTATTATGTGCAGC	CAAGGAAACTACATAGCAAAAACTACTATACTGATCTTATTATGTGCAGC	CAAGGAAACTACATAGCAAAAACTACTATACTGATTTTATTATGTGCAGC	CAAGGAAACTACATAGCAAAAACTACTATACAGATTTTATTATGTGCAGC	AAAGGAAACTACATAGCAAAAACTACTATACAGATTTTATTATGTGCAGC	AAAGGAAACTACATAGCAAGAACTACTATACAGATTTTATTATGTGCAGC	AAAGGAAACTACATAACAAGAACTACTATACAGATTTTATTATGTGCAGC	AAAGGAAACTACATAACAAGAACTACTATACAGATTTTATTATGTGCAGA	AAAGGAAACTACATAACAAGAACTACTATACAGATTTTATTAAGTGCAGA	AAAGGAAACTACATAACAAGAACTACTATACAGATTTTATTAAGTACAGA	AAAGGAAACTACATAACAAGAACTACTATACAGATTTTATTAAGTACAAA	AAAGGAAACTACATAACAAGAACTACTATACAGATTTTATTAACTACAAA	AAAGGAAACTACATAACAAGAACTACTATACAGATTTTATTAACTACAAG	AAAGGAAACTACATAACAAGAACTACTATACAGATTATATTAACTACAAG	AAAGGAAACTACATAACAAGAACTACTATACAGATTATATAAACTACAAG	AAAGGAAACTACATAACAAGAACTACAATACAGATTATATAAACTACAAG	AAAGGACACTACATAACAAGAACTACAATACAGATTATATAAACTACAAG	AAAGGTCACTACATAACAAGAACTACAATACAGATTATATAAACTACAAG	AAAGGTCACTACATAACAAGAACTACACTACAGATTATATAAACTACAAG	AAAGGTCACTACATAACAAGAACTACACTACAGATTATATAAACTACAAG	AAAGGTCACTACATAACAAGAACTACACTACAGATTATATAAACTACAAG	AAAGGTCACTACATAACAAGAACTACACTACAGATTATATAAACTACAAG	AAAGGTCACTACATAACAAGAACTACACTACAGATTATATAAACTACAAG	AAAGGTCACTACATAACAAGAACTACACTACAGATTATATAAACTACAAG	AAAGGTCACTACATAACAAGAACTACACTACAGATTATATAAACTACAAG	AAAGGTCACTACATAACAAGAACTACACTACAGATTATATAAACTACAAG	AAAGGTCACTACATAACAAGAACTACACTACAGATTATATAAACTACAAG	AAAGGTCACTACATAACAAGAACTACACTACAGATTATATAAACTACAAG	AAAGGTCACTACATAACAAGAACTACACTACAGATTATATAAACTACAAG	AAAGGTCACTACATAACAAGAACTACACTACAGATTATATAAACTACAAG	AAAGGTCACTACATAACAAGAACTACACTACAGATTATATAAACTACAAG
90	GCTTAGAAAATGAACTTACAATTCTTCGTCGACAACTATCCTGGATGAGG	GCTTAGAAAAAGAACTTACAATTCTTCGTCGACAACTATCCTGGATGAGG	GCTTAGAAAAAGAACTTACAATTCTTCGTCGACAACTATCCTGGATGATG	GCTAAGAAAAAGAACTTACAATTCTTCGTCGACAACTATCCTGGATGATG	GCTAAGAAAAAGAACTTACAATTCTACGTCGACAACTATCCTGGATGATG	GCTAAGAAAAAGAACTTACAATTCTACATCGACAACTATCCTGGATGATG	GCCAAGAAAAAGAACTTACAATTCTACATCGACAACTATCCTGGATGATG	TCCAAGAAAAAGAACTTACAATTCTACATCGACAACTATCCTGGATGATG	TCCAAGAAAAAGAACTTACAATTCTACATCGACAACTATCCTAGATGATG	TCCAAGAAAAAGAACTTACAAATCTACATCGACAACTATCCTAGATGATG	TCCAAGAAAAAGAACTTACAAATCTACATAGACAACTATCCTAGATGATG	TCCAAGAAAAAGAACTTACAAATCTACAAAGACAACTATCCTAGATGATG	TCCAAGAAAAAGAACTTACAAATCTACAAAGACAACTATCCAAGATGATG	TCCAAGAAAAAGAACTTACAAATCTACAAAGACAACTATACAAGATGATG	TCCAAGAAAAAGAACTTACAAATCTACAAAGACAACTATACAAGATGACG	TCCAAGAAAAAGAAATTACAAATCTACAAAGACAACTATACAAGATGACG	TCCAAGAAAAAGAAACTACAAATCTACAAAGACAACTATACAAGATGACG	TCCAAGAAAAAGAAACTACAAAACTACAAAGACAACTATACAAGATGACG	TCCAAGAAAAAGAAACTACAAAACTACAAAGACAATTATACAAGATGACG	TCCAAGAAAAAGAAACTACAAAACTACAAAGACAATTATACAAGATGACT	TCCAAGAAAAAGAAACTACAAAACTACAAAGACAATTATTCAAGATGACT	TCCAAGAAAAAGAAACTACAAAACTACAAAGACAATTATTCAAGATGACT	TCCAAGAAAAAGAAACTACAAAACTACAAAGACAATTATTCAAGATGACT	TCCAAGAAAAAGAAACTACAAAACTACAAAGACAATTATTCAAGATGACT	TCCAAGAAAAAGAAACTACAAAACTACAAAGACAATTATTCAAGATGACT	TCCAAGAAAAAGAAACTACAAAACTACAAAGACAATTATTCAAGATGACT	TCCAAGAAAAAGAAACTACAAAACTACAAAGACAATTATTCAAGATGACT	TCCAAGAAAAAGAAACTACAAAACTACAAAGACAATTATTCAAGATGACT	TCCAAGAAAAAGAAACTACAAAACTACAAAGACAATTATTCAAGATGACT	TCCAAGAAAAAGAAACTACAAAACTACAAAGACAATTATTCAAGATGACT	TCCAAGAAAAAGAAACTACAAAACTACAAAGACAATTATTCAAGATGACT	TCCAAGAAAAAGAAACTACAAAACTACAAAGACAATTATTCAAGATGACT	TCCAAGAAAAAGAAACTACAAAACTACAAAGACAATTATTCAAGATGACT	TCCAAGAAAAAGAAACTACAAAACTACAAAGACAATTATTCAAGATGACT	TCCAAGAAAAAGAAACTACAAAACTACAAAGACAATTATTCAAGATGACT	TCCAAGAAAAAGAAACTACAAAACTACAAAGACAATTATTCAAGATGACT	TCCAAGAAAAAGAAACTACAAAACTACAAAGACAATTATTCAAGATGACT	TCCAAGAAAAAGAAACTACAAAACTACAAAGACAATTATTCAAGATGACT	TCCAAGAAAAAGAAACTACAAAACTACAAAGACAATTATTCAAGATGACT	TCCAAGAAAAAGAAACTACAAAACTACAAAGACAATTATTCAAGATGACT	TCCAAGAAAAAGAAACTACAAAACTACAAAGACAATTATTCAAGATGACT
91	ACAATGCGTTACCAGTTGTCTCACAACCGCGATACCCCTAGTGGGAAGGT	ACAATACGTTACCAGTTGTCTCACAACCGCGATACCCCTAGTGGGAAGGT	ACAATACGTTACCAGTTGTCTCACAACCGCGATACCCCTAGTGAGAAGGT	AGAATACGTTACCAGTTGTCTCACAACCGCGATACCCCTAGTGAGAAGGT	AGAATACGTTACCAGTTGTCTCACAACCGCGATACCCCTAGTGAGAAGAT	AGAATAAGTTACCAGTTGTCTCACAACCGCGATACCCCTAGTGAGAAGAT	AGAATAAGTTACAAGTTGTCTCACAACCGCGATACCCCTAGTGAGAAGAT	AGAATAAGTTACAAGTTGTCTCACAACCGCGATACCCCTATTGAGAAGAT	AGAATAAGTTACAAGTTGTCTCACAACCGCGATACCCCTATTTAGAAGAT	AGAATAATTTACAAGTTGTCTCACAACCGCGATACCCCTATTTAGAAGAT	AGAATAATTTACAAGTTGTCTCACAACCGCGATACCCCTATATAGAAGAT	AGAATAATTTACAAGTTGTCTCACAACCGCGATACCCCTACATAGAAGAT	AGAATAATTTACAAGTAGTCTCACAACCGCGATACCCCTACATAGAAGAT	AGAATAATTTACAAGTAGTCTCACAAGCGCGATACCCCTACATAGAAGAT	AGAATAATTTACAAGTAGTCTCACAAGAGCGATACCCCTACATAGAAGAT	AGAATAATTTACAAGTAATCTCACAAGAGCGATACCCCTACATAGAAGAT	AGAATAATTTACAAATAATCTCACAAGAGCGATACCCCTACATAGAAGAT	AGAATAATTTACAAATAATTTCACAAGAGCGATACCCCTACATAGAAGAT	AGAATAATTTACAAATAATTACACAAGAGCGATACCCCTACATAGAAGAT	AGAATAATTTACAAATAATTACACAAGAGAGATACCCCTACATAGAAGAT	AGAATAATTTACAAATAATTACACAAGAGATATACCCCTACATAGAAGAT	AGAATTATTTACAAATAATTACACAAGAGATATACCCCTACATAGAAGAT	AGAATTATTTACAAATAATTACACAAGAAATATACCCCTACATAGAAGAT	AGAATTATTTACAAATAATTACACAAGAAATAAACCCCTACATAGAAGAT	AGAATTATTTACAAATAATTACACAAGAAATAAACCCCTACAAAGAAGAT	AGAATTATTTACAAATAATTACACAAGAAATAAACCCCTACAAACAAGAT	AGAATTATTTACAAATAATTACACAAGAAATAAACCCCTACAAACAAGAA	AGAATTATTTACAAATAATTACACAAGAAATAAACCCCTACAGACAAGAA	AGAATTATTTACAAATAATTACACAAGAAATAAACTCCTACAGACAAGAA	AGAATTATTTACAAATAATTACACAAGAAATAAAGTCCTACAGACAAGAA	AGAATTATTTACAAATAATTACACAAGACATAAAGTCCTACAGACAAGAA	AGAATTATTTACAAATAATTAAACAAGACATAAAGTCCTACAGACAAGAA	AGAATTATCTACAAATAATTAAACAAGACATAAAGTCCTACAGACAAGAA	AGAATTATCTACAAATAATTAAACAAGACATAAAGTACTACAGACAAGAA	AGAATTATCTACAAATAATTAAACAAGACATAAAGTACTACAGACAAGAA	AGAATTATCTACAAATAATTAAACAAGACATAAAGTACTACAGACAAGAA	AGAATTATCTACAAATAATTAAACAAGACATAAAGTACTACAGACAAGAA	AGAATTATCTACAAATAATTAAACAAGACATAAAGTACTACAGACAAGAA	AGAATTATCTACAAATAATTAAACAAGACATAAAGTACTACAGACAAGAA	AGAATTATCTACAAATAATTAAACAAGACATAAAGTACTACAGACAAGAA	AGAATTATCTACAAATAATTAAACAAGACATAAAGTACTACAGACAAGAA
92	TCGCACCAAGCAACGCTGTAGAAGGACGTTAGTGTTATAGTACCCCATGT	TCGCACCAAGCAACGCTGTAGAAGGACGTTAGTGTTATAGTACCCCAAGT	TCGCACCAAGCAACGCTATAGAAGGACGTTAGTGTTATAGTACCCCAAGT	TCGCACCAAGCAACGCTATAGAAAGACGTTAGTGTTATAGTACCCCAAGT	TCGCACCAAGCAACGCTATAGAAAGACATTAGTGTTATAGTACCCCAAGT	TCGCACCAAGCAACGCTATAGAAAGACATTACTGTTATAGTACCCCAAGT	TCGCACCAAGAAACGCTATAGAAAGACATTACTGTTATAGTACCCCAAGT	TCGCACCAAGAAACGCTATAGAAAGACATTACTATTATAGTACCCCAAGT	TCGCACCAAGAAACGCTATAGAAAGACATTACTACTATAGTACCCCAAGT	TCGCACCAAGAAACGCTATACAAAGACATTACTACTATAGTACCCCAAGT	TCGCACCAAGAAAAGCTATACAAAGACATTACTACTATAGTACCCCAAGT	TCCCACCAAGAAAAGCTATACAAAGACATTACTACTATAGTACCCCAAGT	TCCCACCAAGAAAAGCTATACAAAGATATTACTACTATAGTACCCCAAGT	TCCCACCAAGAAAAGCTATACAAAGATATTACTACTATAGTACTCCAAGT	TCCCACCAAGAAAAGCTATACAAAGATATTACTACTATAGTACTACAAGT	TCCCATCAAGAAAAGCTATACAAAGATATTACTACTATAGTACTACAAGT	TCCCATCAAGACAAGCTATACAAAGATATTACTACTATAGTACTACAAGT	TCCCATCAAGACAAGCTATACAAATATATTACTACTATAGTACTACAAGT	TCCCATCAAGACAAGCTATACAAATATACTACTACTATAGTACTACAAGT	TCCCATCAAGACAAGCTATACAAATTTACTACTACTATAGTACTACAAGT	TCCCATCAAGACAAGCTATACAAATTTACTACTACTATAGTACTACAAGA	TCCAATCAAGACAAGCTATACAAATTTACTACTACTATAGTACTACAAGA	TCCAAGCAAGACAAGCTATACAAATTTACTACTACTATAGTACTACAAGA	TCCAAGCAAGACAAACTATACAAATTTACTACTACTATAGTACTACAAGA	TCCAAGCAAGACAAACTATACAAATTTACTACTACTATAGAACTACAAGA	TCCAAGCAAGACAAACTATACAAATTTACTACTACTATATAACTACAAGA	TCCAAGCAAGACAAACTATATAAATTTACTACTACTATATAACTACAAGA	TCCAAGCAAGACAAACTATATAAATTTACTACAACTATATAACTACAAGA	TCCAAGCAAGACAAACTATATAAATTTACTACAATTATATAACTACAAGA	TCCAAGCAAGACAAACTATATAAATTTACTACAATTACATAACTACAAGA	TCCAAGCAAGACAAACTATATAAATTTACTACAATTACAAAACTACAAGA	TCCAAGCAAGACAAACTATATAAATTTACTACAATTACAAAACTACAAGA	TCCAAGCAAGACAAACTATATAAATTTACTACAATTACAAAACTACAAGA	TCCAAGCAAGACAAACTATATAAATTTACTACAATTACAAAACTACAAGA	TCCAAGCAAGACAAACTATATAAATTTACTACAATTACAAAACTACAAGA	TCCAAGCAAGACAAACTATATAAATTTACTACAATTACAAAACTACAAGA	TCCAAGCAAGACAAACTATATAAATTTACTACAATTACAAAACTACAAGA	TCCAAGCAAGACAAACTATATAAATTTACTACAATTACAAAACTACAAGA	TCCAAGCAAGACAAACTATATAAATTTACTACAATTACAAAACTACAAGA	TCCAAGCAAGACAAACTATATAAATTTACTACAATTACAAAACTACAAGA	TCCAAGCAAGACAAACTATATAAATTTACTACAATTACAAAACTACAAGA
93	CATACGGGGACACCTTGAAAGTAACGTCCCCGTTGCGCCAAGAGCAGTGT	CATACGGGGACACCTTGAAAGTAACGTCCCCGTTGCGCCAAGAGCAGAGT	CATACGGAGACACCTTGAAAGTAACGTCCCCGTTGCGCCAAGAGCAGAGT	CATACGGAGACACCATGAAAGTAACGTCCCCGTTGCGCCAAGAGCAGAGT	CATACGGAGACACCATGAAAGTAACGTCCCCGTTGCCCCAAGAGCAGAGT	CATACGAAGACACCATGAAAGTAACGTCCCCGTTGCCCCAAGAGCAGAGT	CATACGAAGACACCATGAAAGTAACGTCCCCGTTGCCCCAAGAGAAGAGT	CATACGAAGACACCATGAAAGTAACGTCCCCGTTGCCCCAAGACAAGAGT	CATACGAAGACACCATGAAAGTAACGTCCCCGTTGCCCCAAGACAAGATT	GATACGAAGACACCATGAAAGTAACGTCCCCGTTGCCCCAAGACAAGATT	GATACTAAGACACCATGAAAGTAACGTCCCCGTTGCCCCAAGACAAGATT	GATACTAAGACACCATGAAAGTAAAGTCCCCGTTGCCCCAAGACAAGATT	GATACTAAGACACCATGAAACTAAAGTCCCCGTTGCCCCAAGACAAGATT	GATACTAAGACACCATGAAACTAAAGTCCCCGTTGCACCAAGACAAGATT	GATACTAAGACACCATGAAACTAAAGTCCCCGTTTCACCAAGACAAGATT	GATACTAAGACACCATGAAACTAAAGTCCACGTTTCACCAAGACAAGATT	GATACTAAGACAACATGAAACTAAAGTCCACGTTTCACCAAGACAAGATT	GATACTAAGACAAGATGAAACTAAAGTCCACGTTTCACCAAGACAAGATT	GATACAAAGACAAGATGAAACTAAAGTCCACGTTTCACCAAGACAAGATT	GTTACAAAGACAAGATGAAACTAAAGTCCACGTTTCACCAAGACAAGATT	GTTACAAAGACAAGATGAAACTAAAGTCCAAGTTTCACCAAGACAAGATT	GTCACAAAGACAAGATGAAACTAAAGTCCAAGTTTCACCAAGACAAGATT	GTCACAAAGACAAGATGAAACTAAAGTCCAAGTTTCACCAAGACAAGATG	GTCACAAAGACAAGATGAAACTAAAGTCCAAGTTTCATCAAGACAAGATG	GTCACAAAGACAAGATGAAACTAAAGTCCAAGTTTAATCAAGACAAGATG	GTCACAAAGACAAGATGAAACTAAAGTCCAAGATTAATCAAGACAAGATG	GTCACAAAGACAAGATGAAACTAAAGGCCAAGATTAATCAAGACAAGATG	GTCACAAAGACAAGATGAAACTAAAGGCCAAGATTATTCAAGACAAGATG	GTCACAAAGACAAGATGAAACTAAAGGCCAAGATTATTCAAGACAAGAAG	GTCACAAAGACAAGATGAAACTAAAAGCCAAGATTATTCAAGACAAGAAG	GTCACAAAGACAAGATGAAACTACAAGCCAAGATTATTCAAGACAAGAAG	GTCACAAAGACAAGATGAAACTACAAGACAAGATTATTCAAGACAAGAAG	GTCACAAAGACAAGATGAAACTACAAGACAAGATTATTCAAGACAAGAAG	GTCACAAAGACAAGATGAAACTACAAGACAAGATTATTCAAGACAAGAAG	GTCACAAAGACAAGATGAAACTACAAGACAAGATTATTCAAGACAAGAAG	GTCACAAAGACAAGATGAAACTACAAGACAAGATTATTCAAGACAAGAAG	GTCACAAAGACAAGATGAAACTACAAGACAAGATTATTCAAGACAAGAAG	GTCACAAAGACAAGATGAAACTACAAGACAAGATTATTCAAGACAAGAAG	GTCACAAAGACAAGATGAAACTACAAGACAAGATTATTCAAGACAAGAAG	GTCACAAAGACAAGATGAAACTACAAGACAAGATTATTCAAGACAAGAAG	GTCACAAAGACAAGATGAAACTACAAGACAAGATTATTCAAGACAAGAAG
94	TGGCATTCCAAAGAGGTGCGCTTAACATAGGCCAGCTATAGGTCGTCTTA	TGGCATTCCAAAGAGGTGCGCTTAACATAGGCCAGCTACAGGTCGTCTTA	TGGCATTCCAAAGAGGTGCGCTTAACATAGGCCAGCTACAGGTCGTCATA	TGGCATTCCAAAGAGGTGCGCTTAACATAGGCCAGCTACAGGTCGTCATG	TGGCATTCCAAAGAGGTGAGCTTAACATAGGCCAGCTACAGGTCGTCATG	TGGCATTCCAAAGAGGTGAGCTTAACATAGACCAGCTACAGGTCGTCATG	TGGCATTCCAAAGAGGTGAGCTTAACATAGACAAGCTACAGGTCGTCATG	TGGCATTCCAAAGAGGTGAGCTTAACATAGACAAGATACAGGTCGTCATG	TGGCATTCCAAAGAGGTGAGCTTAACATATACAAGATACAGGTCGTCATG	TGGCATTCCAAAGAGGTGAGCTTAATATATACAAGATACAGGTCGTCATG	TGGCATTCCAAAGAGGTGAGCTAAATATATACAAGATACAGGTCGTCATG	TGGCATTCCAAAGAGGTAAGCTAAATATATACAAGATACAGGTCGTCATG	TGGCATTCCAAAGAGGTAAGCTAAATATATACAAGAAACAGGTCGTCATG	TGGCATTCCAGAGAGGTAAGCTAAATATATACAAGAAACAGGTCGTCATG	TGGCATTCCAGAAAGGTAAGCTAAATATATACAAGAAACAGGTCGTCATG	TGGCATTCAAGAAAGGTAAGCTAAATATATACAAGAAACAGGTCGTCATG	TGTCATTCAAGAAAGGTAAGCTAAATATATACAAGAAACAGGTCGTCATG	TGTCATACAAGAAAGGTAAGCTAAATATATACAAGAAACAGGTCGTCATG	AGTCATACAAGAAAGGTAAGCTAAATATATACAAGAAACAGGTCGTCATG	AGACATACAAGAAAGGTAAGCTAAATATATACAAGAAACAGGTCGTCATG	AGAAATACAAGAAAGGTAAGCTAAATATATACAAGAAACAGGTCGTCATG	AGAAATACAAGAAAGGTAAGCTAAATATATACAAGAAACAGGTCGACATG	AGAAATACAAGAAAGGTAAGCTAAATATATACAAGAAACAAGTCGACATG	AGAAATACAAGAAAGGTAAGCTAAATATATACAAGAAACAAGACGACATG	AGAAATACAAGAAAGGTAAGCTAAATATATACAAGAAACAAGACGAGATG	AGAAATACAAGAAAGGTAAGCTAAATATATACAAGAAACAAGACAAGATG	AGAAATACAAGAAAGGTAAGCTAAATATATACAAGAAACAAGACAAAATG	AGAATTACAAGAAAGGTAAGCTAAATATATACAAGAAACAAGACAAAATG	AGAATTACAAGAAAGATAAGCTAAATATATACAAGAAACAAGACAAAATG	AGAATTACAAGCAAGATAAGCTAAATATATACAAGAAACAAGACAAAATG	AGAATTACAAGCAAGATAAGCTAAATATATACAAGAAACAAGACAAAATG	AGAATTACAAGCAAGATAAGCTAAATATATACAAGAAACAAGACAAAATG	AGAATTACAAGCAAGATAAGCTAAATATATACAAGAAACAAGACAAAATG	AGAATTACAAGCAAGATAAGCTAAATATATACAAGAAACAAGACAAAATG	AGAATTACAAGCAAGATAAGCTAAATATATACAAGAAACAAGACAAAATG	AGAATTACAAGCAAGATAAGCTAAATATATACAAGAAACAAGACAAAATG	AGAATTACAAGCAAGATAAGCTAAATATATACAAGAAACAAGACAAAATG	AGAATTACAAGCAAGATAAGCTAAATATATACAAGAAACAAGACAAAATG	AGAATTACAAGCAAGATAAGCTAAATATATACAAGAAACAAGACAAAATG	AGAATTACAAGCAAGATAAGCTAAATATATACAAGAAACAAGACAAAATG	AGAATTACAAGCAAGATAAGCTAAATATATACAAGAAACAAGACAAAATG
95	TGTGTAAAATTTAGCAATGTTTGACCATAGGCCCAAGGGCGGAACGCTTC	TGTGTAAAATTTATCAATGTTTGACCATAGGCCCAAGGGCGGAACGCTTC	TGTGTAAAATGTATCAATGTTTGACCATAGGCCCAAGGGCGGAACGCTTC	TGTGTAAAATGTATCAACGTTTGACCATAGGCCCAAGGGCGGAACGCTTC	TGTGTAAAATGTATCAACGTTTGACCATAGGCCCAATGGCGGAACGCTTC	TGTGTAAAATGTATCAACGTTTGACCATAGGCACAATGGCGGAACGCTTC	TGTGCAAAATGTATCAACGTTTGACCATAGGCACAATGGCGGAACGCTTC	AGTGCAAAATGTATCAACGTTTGACCATAGGCACAATGGCGGAACGCTTC	AGTGCAAGATGTATCAACGTTTGACCATAGGCACAATGGCGGAACGCTTC	AGTGCAAGATGTATCAACGTTTGACCATAGGCACAATGGCGGAACGCGTC	AGTGCAAGATGTATAAACGTTTGACCATAGGCACAATGGCGGAACGCGTC	AGTGCAAGATGTATAAACGTTTGACCATAGGCACAATGGCTGAACGCGTC	AGTGCAAGATGTATAAACGTTTGACCATAGGCACAATGACTGAACGCGTC	AGTGCAAGATGTATAAACGTTTGACCATAAGCACAATGACTGAACGCGTC	AGTGCAAGATGTATAAACGTTCGACCATAAGCACAATGACTGAACGCGTC	AGTGCAAGATGTATAAAAGTTCGACCATAAGCACAATGACTGAACGCGTC	AGTGCAAGATGAATAAAAGTTCGACCATAAGCACAATGACTGAACGCGTC	AGTGCAAGATGACTAAAAGTTCGACCATAAGCACAATGACTGAACGCGTC	AGTGCAAGATGACTAAAAGTTCGACCTTAAGCACAATGACTGAACGCGTC	AGTGCAAGATGACTAAAAGTTCGACCTTAAGCAAAATGACTGAACGCGTC	AGTGCAAGATGACTAAAAGTTCGATCTTAAGCAAAATGACTGAACGCGTC	AGTGCAAGATGACTAAAAGTTCGATTTTAAGCAAAATGACTGAACGCGTC	AGTGCAAGATGACTAAAAGATCGATTTTAAGCAAAATGACTGAACGCGTC	AGTGCAAGATGACTAAAAGATCCATTTTAAGCAAAATGACTGAACGCGTC	AGTGCAAGATGACTAAAAGATCCATTTTAAGAAAAATGACTGAACGCGTC	AGTGCAAGATGACTAAAAGATCCATTTTAAGAAAAATGACTGAACGTGTC	AGTGCAAGATGACTAAAAGATCCATTTTAAGAAAAATGACTGAAGGTGTC	AGTGCAAGATGACTAAAAGATCCATTTTAAGAAAAATGACTGAAGGTGTT	AGTGCAAGATGACTAAAAGATCCAATTTAAGAAAAATGACTGAAGGTGTT	AGTGCAAGATGACTAAAAGATCCAATTTACGAAAAATGACTGAAGGTGTT	AGTGCAAGATGACTAAAAGATCCAAGTTACGAAAAATGACTGAAGGTGTT	AGTGCAAGATGACTAAAAGACCCAAGTTACGAAAAATGACTGAAGGTGTT	AGTGCAAGATGACTAAAAGACCCAAGTTACGAAAAATGACTGAAGGTGTT	AGTGCAAGATGACTAAAAGACCCAAGTTACGAAAAATGACTGAAGGTGTT	AGTGCAAGATGACTAAAAGACCCAAGTTACGAAAAATGACTGAAGGTGTT	AGTGCAAGATGACTAAAAGACCCAAGTTACGAAAAATGACTGAAGGTGTT	AGTGCAAGATGACTAAAAGACCCAAGTTACGAAAAATGACTGAAGGTGTT	AGTGCAAGATGACTAAAAGACCCAAGTTACGAAAAATGACTGAAGGTGTT	AGTGCAAGATGACTAAAAGACCCAAGTTACGAAAAATGACTGAAGGTGTT	AGTGCAAGATGACTAAAAGACCCAAGTTACGAAAAATGACTGAAGGTGTT	AGTGCAAGATGACTAAAAGACCCAAGTTACGAAAAATGACTGAAGGTGTT
96	ACCGGATATTGAAAAGAATGCATAGTATTCGCGACCTAGCTCCTCCGGCC	ACCGGATATTGAAAAGAATGCATAGTATTCGCGACCTATCTCCTCCGGCC	ACCGGATATTGAAAAGAATACATAGTATTCGCGACCTATCTCCTCCGGCC	ACCGGATATTGAAAAGAATACATAGTATTCACGACCTATCTCCTCCGGCC	ACCGGATATTGAAAAGAATACATAGTATTCAAGACCTATCTCCTCCGGCC	ACCGGATATTTAAAAGAATACATAGTATTCAAGACCTATCTCCTCCGGCC	ACCGGATATTTAAAAGAATACATAGTATTCAAGACATATCTCCTCCGGCC	ACCGGATATTTAAAAGAATACATAGTATACAAGACATATCTCCTCCGGCC	ACCGGATATTTAAAAGAATACATATTATACAAGACATATCTCCTCCGGCC	ACCGGCTATTTAAAAGAATACATATTATACAAGACATATCTCCTCCGGCC	TCCGGCTATTTAAAAGAATACATATTATACAAGACATATCTCCTCCGGCC	TCCGGCTATTTAAAAGAATACATATTATACAAGACATATCTCCTACGGCC	TCCGGCTATTTAAAAGAATACATATTATACAAGACATATCTACTACGGCC	TCCGGCTATTTAAAAGAATACATATTATACAAGACATATCTACTACGACC	TCCAGCTATTTAAAAGAATACATATTATACAAGACATATCTACTACGACC	TCCAGCTATTTAAAAGAATACATATTATACAAGACATATCTACTACGACG	TCCAGCTATTTAAAAGAATACATATTATACAAGACATATCTACTACTACG	TCCAGCTATTTAAAAGAATACATATTATACAAGACATATCTACTACTAAG	TCCAGCTATTTAAAAGAATACATATTATACAAGACATATATACTACTAAG	TCCAGCTATTTAAAAGACTACATATTATACAAGACATATATACTACTAAG	TCCAGCTATTTAAAAAACTACATATTATACAAGACATATATACTACTAAG	TCCAGCTATTTAATAAACTACATATTATACAAGACATATATACTACTAAG	TCAAGCTATTTAATAAACTACATATTATACAAGACATATATACTACTAAG	TCAAGCTATTTAATAAACTACATACTATACAAGACATATATACTACTAAG	TCAAGCTATATAATAAACTACATACTATACAAGACATATATACTACTAAG	TCAAGCTATATAATAAACTACTTACTATACAAGACATATATACTACTAAG	TCAAGCTATATAATAAACTACTTACTATACAAGACATATATACTACTAAG	TCAAGCTATATAATAAACTACTTACTATACAAGACATATATACTACTAAG	TCAAGCTATATAATAAACTACTTACTATACAAGACATATATACTACTAAG	TCAAGCTATATAATAAACTACTTACTATACAAGACATATATACTACTAAG	TCAAGCTATATAATAAACTACTTACTATACAAGACATATATACTACTAAG	TCAAGCTATATAATAAACTACTTACTATACAAGACATATATACTACTAAG	TCAAGCTATATAATAAACTACTTACTATACAAGACATATATACTACTAAG	TCAAGCTATATAATAAACTACTTACTATACAAGACATATATACTACTAAG	TCAAGCTATATAATAAACTACTTACTATACAAGACATATATACTACTAAG	TCAAGCTATATAATAAACTACTTACTATACAAGACATATATACTACTAAG	TCAAGCTATATAATAAACTACTTACTATACAAGACATATATACTACTAAG	TCAAGCTATATAATAAACTACTTACTATACAAGACATATATACTACTAAG	TCAAGCTATATAATAAACTACTTACTATACAAGACATATATACTACTAAG	TCAAGCTATATAATAAACTACTTACTATACAAGACATATATACTACTAAG	TCAAGCTATATAATAAACTACTTACTATACAAGACATATATACTACTAAG
97	GATGCTCACCTGGAGCAATGATACACCCAGCCTTCATCAACATCCAACCG	GATACTCACCTGGAGCAATGATACACCCAGCCTTCATCAACATCCAACCG	GATACTCACCTGGAGCAATGATACACCAAGCCTTCATCAACATCCAACCG	GATACTCACCTGGAGCAATGATACACCAAGCCTTCATCAAGATCCAACCG	GATACTCACCTGGAGCAATGATACACCAAGCCTTCATCAAGATCCAAGCG	GATACTCACCTGAAGCAATGATACACCAAGCCTTCATCAAGATCCAAGCG	GATACTCACCTGAAGCAATGATACACCAAGCCTTCATCAAGATCCAAGAG	GATACTCACCTGAAGCAATGATACACCAAGCCTTCATCAAGATACAAGAG	GATACTCACCTGAAGCAATGATACACCAAGCCTTCATCAAGAAACAAGAG	GATACTCACCTGAAGCAATGATACAACAAGCCTTCATCAAGAAACAAGAG	GATACACACCTGAAGCAATGATACAACAAGCCTTCATCAAGAAACAAGAG	GATACACACCTGAAGCAATGATACAACAAGCCTTCATCAAGAAACAAGAA	GATACACACCTGAAGCAATGAGACAACAAGCCTTCATCAAGAAACAAGAA	GATACACAGCTGAAGCAATGAGACAACAAGCCTTCATCAAGAAACAAGAA	GTTACACAGCTGAAGCAATGAGACAACAAGCCTTCATCAAGAAACAAGAA	GTTACACAGCTGAAGCAATGAGACAAGAAGCCTTCATCAAGAAACAAGAA	GTTACACAGCTGAAGCCATGAGACAAGAAGCCTTCATCAAGAAACAAGAA	GTTACAGAGCTGAAGCCATGAGACAAGAAGCCTTCATCAAGAAACAAGAA	GTTACAGAGCTGAAGACATGAGACAAGAAGCCTTCATCAAGAAACAAGAA	GTTACAGAGCTGAAGACATGAGACAAGAAGCCATCATCAAGAAACAAGAA	GTTACAGAGCTGAAGACATGAGACAAGAAGCCATCAACAAGAAACAAGAA	GTTACAGAGCTGAAGACATGAGACAAGAAGCCATCTACAAGAAACAAGAA	GTTACAGAGCTGAAGACATGAGACAAGAAGCCATCTACAAGAAACAAGAC	GTTACAGAGCTGAAGACATGAGACAAGAAGCCATCTACAAGAAACAAGAC	GTTACAGAGCTGAAGACATGAGACAAGAAGCCATCTACAAGAAACAAGAC	GTTACAGAGCTGAAGACATGAGACAAGAAGCCATCTACAAGAAACAAGAC	GTTACAGAGCTGAAGACATGAGACAAGAAGCCATCTACAAGAAACAAGAC	GTTACAGAGCTGAAGACATGAGACAAGAAGCCATCTACAAGAAACAAGAC	GTTACAGAGCTGAAGACATGAGACAAGAAGCCATCTACAAGAAACAAGAC	GTTACAGAGCTGAAGACATGAGACAAGAAGCCATCTACAAGAAACAAGAC	GTTACAGAGCTGAAGACATGAGACAAGAAGCCATCTACAAGAAACAAGAC	GTTACAGAGCTGAAGACATGAGACAAGAAGCCATCTACAAGAAACAAGAC	GTTACAGAGCTGAAGACATGAGACAAGAAGCCATCTACAAGAAACAAGAC	GTTACAGAGCTGAAGACATGAGACAAGAAGCCATCTACAAGAAACAAGAC	GTTACAGAGCTGAAGACATGAGACAAGAAGCCATCTACAAGAAACAAGAC	GTTACAGAGCTGAAGACATGAGACAAGAAGCCATCTACAAGAAACAAGAC	GTTACAGAGCTGAAGACATGAGACAAGAAGCCATCTACAAGAAACAAGAC	GTTACAGAGCTGAAGACATGAGACAAGAAGCCATCTACAAGAAACAAGAC	GTTACAGAGCTGAAGACATGAGACAAGAAGCCATCTACAAGAAACAAGAC	GTTACAGAGCTGAAGACATGAGACAAGAAGCCATCTACAAGAAACAAGAC	GTTACAGAGCTGAAGACATGAGACAAGAAGCCATCTACAAGAAACAAGAC
98	AAACCAGGGGGCCGAATGGGAAGCGAAGACCTCAATGTGGCTGACCTATG	AAACCAGGGGGCCGAATGGGAAGCGAAGACCTCAATTTGGCTGACCTATG	AAACCAGGGGGCCGAATAGGAAGCGAAGACCTCAATTTGGCTGACCTATG	AAACCAGGGGGCCGAATAGGAAGCGAAGACCTCAATTTGGCTGAACTATG	AAACCAGGTGGCCGAATAGGAAGCGAAGACCTCAATTTGGCTGAACTATG	AAACCAGGTGGCCGAATAGGAAGCTAAGACCTCAATTTGGCTGAACTATG	AAACCAGGTGGCCGAATAGGAAACTAAGACCTCAATTTGGCTGAACTATG	AAACCAGGTGGCCGAATAAGAAACTAAGACCTCAATTTGGCTGAACTATG	AAACCAGGTGGCTGAATAAGAAACTAAGACCTCAATTTGGCTGAACTATG	AAACCAGGTCGCTGAATAAGAAACTAAGACCTCAATTTGGCTGAACTATG	AAACCAGGTCGCTAAATAAGAAACTAAGACCTCAATTTGGCTGAACTATG	AAACTAGGTCGCTAAATAAGAAACTAAGACCTCAATTTGGCTGAACTATG	AAACTAGGTCGCTAAATAAGAAACTAAGACCTCAATTAGGCTGAACTATG	AAACTAGGTCGCTAAATAAGAAACTAAGACCTCAATTAAGCTGAACTATG	AAACTAGGTCGCTAAATAAGAAACTAAGACATCAATTAAGCTGAACTATG	AAACTAGGTCGCTAAATAAGAAACTAAGATATCAATTAAGCTGAACTATG	AAACTAGGTCGCTAAATAAGAAACTAAGATATCTATTAAGCTGAACTATG	AAACTAGGTCGCTAAATAAGAAACTAAGATAACTATTAAGCTGAACTATG	AGACTAGGTCGCTAAATAAGAAACTAAGATAACTATTAAGCTGAACTATG	AGACAAGGTCGCTAAATAAGAAACTAAGATAACTATTAAGCTGAACTATG	AGACAAGATCGCTAAATAAGAAACTAAGATAACTATTAAGCTGAACTATG	AGACAAGATCGCTAAATAAGATACTAAGATAACTATTAAGCTGAACTATG	AGACAAGATCGCTAAATAAGATACTAAGATAACTATTAAGCTAAACTATG	AGACAAGATCGCTAAATAAGATACTAAGATAACTATTAAGATAAACTATG	AGACAAGATCGCTAAATAAGATACTAAGATAACTACTAAGATAAACTATG	AGACAAGACCGCTAAATAAGATACTAAGATAACTACTAAGATAAACTATG	AGACAAGACCGCTAAATAAGATACAAAGATAACTACTAAGATAAACTATG	AGACAAGACCGCTACATAAGATACAAAGATAACTACTAAGATAAACTATG	AGACAAGACAGCTACATAAGATACAAAGATAACTACTAAGATAAACTATG	AGACAAGACAACTACATAAGATACAAAGATAACTACTAAGATAAACTATG	AGACAAGACAACTATATAAGATACAAAGATAACTACTAAGATAAACTATG	AGACAAGATAACTATATAAGATACAAAGATAACTACTAAGATAAACTATG	AGACAAGATAACTATATAAGATACAAAGATATCTACTAAGATAAACTATG	AGACAAGATAACTATATAAGATACAAAGATATATACTAAGATAAACTATG	AGACAAGATAACTATATAAGATACAAAGATATATACTAAGATAAACTAAG	AGACAAGATAACTATATAAGATACAAAGTTATATACTAAGATAAACTAAG	AGACAAGATAACTATATAAGATACAAAGTTATATACTAAGATAAACTAAG	AGACAAGATAACTATATAAGATACAAAGTTATATACTAAGATAAACTAAG	AGACAAGATAACTATATAAGATACAAAGTTATATACTAAGATAAACTAAG	AGACAAGATAACTATATAAGATACAAAGTTATATACTAAGATAAACTAAG	AGACAAGATAACTATATAAGATACAAAGTTATATACTAAGATAAACTAAG
99	CCAGGATTCAGATGTTTAAACAATGGAAAGCAAAGTGAAATTGTACCAAG	CCAGGATTCAGATGTTTAAACAATCGAAAGCAAAGTGAAATTGTACCAAG	CCAGGATTCAGATGTTTAAACAATCGAAAGCAAAGAGAAATTGTACCAAG	CCAGGATTCAGATGTTTAAACAAGCGAAAGCAAAGAGAAATTGTACCAAG	CCAGGATTCAGATGTTTAAACAAGAGAAAGCAAAGAGAAATTGTACCAAG	CCAGGATTAAGATGTTTAAACAAGAGAAAGCAAAGAGAAATTGTACCAAG	CAAGGATTAAGATGTTTAAACAAGAGAAAGCAAAGAGAAATTGTACCAAG	CAAGAATTAAGATGTTTAAACAAGAGAAAGCAAAGAGAAATTGTACCAAG	CAAGAATTAAGATGTTTAAACAAGAGAAAGCAAAGAGAAATTGTACAAAG	CAAGAATTAAGATGTTTAAACAAGAGAAAGCAAAGAGAAATTTTACAAAG	CAAGAATTAAGATGTTTAAACAAGAGAAAGCAAAGACAAATTTTACAAAG	CAAGAATTAAGATGTTAAAACAAGAGAAAGCAAAGACAAATTTTACAAAG	CAAGAACTAAGATGTTAAAACAAGAGAAAGCAAAGACAAATTTTACAAAG	CAAGAACTAAGATGTTAAAACAAGAGAAAGCCAAGACAAATTTTACAAAG	CAAGAACTAAGATGTTAAAACAAGACAAAGCCAAGACAAATTTTACAAAG	CAAGAACCAAGATGTTAAAACAAGACAAAGCCAAGACAAATTTTACAAAG	CAAGAAACAAGATGTTAAAACAAGACAAAGCCAAGACAAATTTTACAAAG	CAAGAGACAAGATGTTAAAACAAGACAAAGCCAAGACAAATTTTACAAAG	CAAGAGACAAGATGATAAAACAAGACAAAGCCAAGACAAATTTTACAAAG	CAAGAGACAAGATGATTAAACAAGACAAAGCCAAGACAAATTTTACAAAG	CAAGAGACAAGATGATTAAACAAGACAAAGCCAAGACAAATATTACAAAG	CAAGAGACAAGATGATTAAACAAGACAAAGCCAAGACTAATATTACAAAG	CAAGAGACAAGATGATTAAACAAGACAAAGACAAGACTAATATTACAAAG	CAAGAGACAAGATTATTAAACAAGACAAAGACAAGACTAATATTACAAAG	CAAGAGACAAGACTATTAAACAAGACAAAGACAAGACTAATATTACAAAG	CAAGAGACAAGACTATTAAACAAGACAAAGACAAGACTAATATTACAAAG	CAAGAGACAAGACTATTAAACAAGACAAAGACAAGACTAATATTACAAAG	CAAGAGACAAGACTATTAAACAAGACAAAGACAAGACTAATATTACAAAG	CAAGAGACAAGACTATTAAACAAGACAAAGACAAGACTAATATTACAAAG	CAAGAGACAAGACTATTAAACAAGACAAAGACAAGACTAATATTACAAAG	CAAGAGACAAGACTATTAAACAAGACAAAGACAAGACTAATATTACAAAG	CAAGAGACAAGACTATTAAACAAGACAAAGACAAGACTAATATTACAAAG	CAAGAGACAAGACTATTAAACAAGACAAAGACAAGACTAATATTACAAAG	CAAGAGACAAGACTATTAAACAAGACAAAGACAAGACTAATATTACAAAG	CAAGAGACAAGACTATTAAACAAGACAAAGACAAGACTAATATTACAAAG	CAAGAGACAAGACTATTAAACAAGACAAAGACAAGACTAATATTACAAAG	CAAGAGACAAGACTATTAAACAAGACAAAGACAAGACTAATATTACAAAG	CAAGAGACAAGACTATTAAACAAGACAAAGACAAGACTAATATTACAAAG	CAAGAGACAAGACTATTAAACAAGACAAAGACAAGACTAATATTACAAAG	CAAGAGACAAGACTATTAAACAAGACAAAGACAAGACTAATATTACAAAG	CAAGAGACAAGACTATTAAACAAGACAAAGACAAGACTAATATTACAAAG
100	GGGATATCACCAAGACCGGTCTAGACGACGTGGACCCAGTCCTGTGGCAA	GGGATATCACCAAGACCGGTCTAGACGACATGGACCCAGTCCTGTGGCAA	GGGATATGACCAAGACCGGTCTAGACGACATGGACCCAGTCCTGTGGCAA	GGGATATGACCAAGACCGGTCTAGACGACATGGACCCAGTCCTGAGGCAA	GGGATATGACCAAGACAGGTCTAGACGACATGGACCCAGTCCTGAGGCAA	GGGATATGACCAAGACAGGTCAAGACGACATGGACCCAGTCCTGAGGCAA	GGGATATGACCAAGACAGGTCAAGACGACATGGACCCAGTCCTGAGGAAA	GGGATATGACCAAGACAGGTCAAGACGACATGGACCCAGTCCTGAGGAAG	GGGATATGACCAAGACAGGTCAAGACGACATGGACCCAGTCCTGAGCAAG	GGGATATGACCAAGACAGGTCAAGACGACATGGACCCAGTCCTGAACAAG	AGGATATGACCAAGACAGGTCAAGACGACATGGACCCAGTCCTGAACAAG	AGAATATGACCAAGACAGGTCAAGACGACATGGACCCAGTCCTGAACAAG	AGAATATAACCAAGACAGGTCAAGACGACATGGACCCAGTCCTGAACAAG	AGAATATAACCAAGACAGGTCAAGACAACATGGACCCAGTCCTGAACAAG	AGAATATAACCAAGACAGGTCAAGACAAGATGGACCCAGTCCTGAACAAG	AGAATATAACCAAGACAGGTCAAGACAAGATGGACCAAGTCCTGAACAAG	AGAATATAACCAAGACAGGTCAAGACAAGATGTACCAAGTCCTGAACAAG	AGAATATAACCAAGACAGGTCAAGACAAGATGTACAAAGTCCTGAACAAG	AGAATATAACCAAGACAGGTCAAGACAAGATTTACAAAGTCCTGAACAAG	AGAATATAACCAAGACAGGTCAAGACAAGATTTACAAAGTCCAGAACAAG	AGAATATAACCAAGACAGGTCAAGACAAGATTTACAAAGTCAAGAACAAG	AGAATATAACTAAGACAGGTCAAGACAAGATTTACAAAGTCAAGAACAAG	AGAATATAACTAAGAAAGGTCAAGACAAGATTTACAAAGTCAAGAACAAG	AGAATTTAACTAAGAAAGGTCAAGACAAGATTTACAAAGTCAAGAACAAG	AGAATTTAACTAAGAAAGGTCAAGACAAGATTTACAAAGACAAGAACAAG	AGAATTTAACTAAGAAAGGTCAAGACAAGACTTACAAAGACAAGAACAAG	AGAATTTAACTAAGAAAGTTCAAGACAAGACTTACAAAGACAAGAACAAG	AGAATTTAACTAAGAAAGTTCAAGACAAGACTTACAAAGACAAGAACAAG	AGAATTTAACTAAGAAAGTTCAAGACAAGACTTACAAAGACAAGAACAAG	AGAATTTAACTAAGAAAGTTCAAGACAAGACTTACAAAGACAAGAACAAG	AGAATTTAACTAAGAAAGTTCAAGACAAGACTTACAAAGACAAGAACAAG	AGAATTTAACTAAGAAAGTTCAAGACAAGACTTACAAAGACAAGAACAAG	AGAATTTAACTAAGAAAGTTCAAGACAAGACTTACAAAGACAAGAACAAG	AGAATTTAACTAAGAAAGTTCAAGACAAGACTTACAAAGACAAGAACAAG	AGAATTTAACTAAGAAAGTTCAAGACAAGACTTACAAAGACAAGAACAAG	AGAATTTAACTAAGAAAGTTCAAGACAAGACTTACAAAGACAAGAACAAG	AGAATTTAACTAAGAAAGTTCAAGACAAGACTTACAAAGACAAGAACAAG	AGAATTTAACTAAGAAAGTTCAAGACAAGACTTACAAAGACAAGAACAAG	AGAATTTAACTAAGAAAGTTCAAGACAAGACTTACAAAGACAAGAACAAG	AGAATTTAACTAAGAAAGTTCAAGACAAGACTTACAAAGACAAGAACAAG	AGAATTTAACTAAGAAAGTTCAAGACAAGACTTACAAAGACAAGAACAAG
101	ATGAACTATGACGCACCTGGCGTTAGATGAACGAGTACAATTGCCGCACA	ATGAACTATGACGCACCTGGCGTAAGATGAACGAGTACAATTGCCGCACA	ATGAACTATGACGCACCTGGCGTAAGATGAACGAGTACAATTGCCGCACA	ATGAACTATGACGCACCTGGCGTAAGATGAACGAGTACAATTGCCGCACA	ATGAACTATGACGCACCTGGCGTAAGATGAACGAGTACAATTGCCGCACA	ATGAACTATGACGCACCTGGCGTAAGATGAACGAGTACAATTGCCGCACA	ATGAACTATGACGCACCTGGCGTAAGATGAACGAGTACAATTGCCGCACA	ATGAACTATGACGCACCTGGCGTAAGATGAACGAGTACAATTGCCGCACA	ATGAACTATGACGCACCTGGCGTAAGATGAACGAGTACAATTGCCGCACA	ATGAACTATGACGCACCTGGCGTAAGATGAACGAGTACAATTGCCGCACA	ATGAACTATGACGCACCTGGCGTAAGATGAACGAGTACAATTGCCGCACA	ATGAACTATGACGCACCTGGCGTAAGATGAACGAGTACAATTGCCGCACA	ATGAACTATGACGCACCTGGCGTAAGATGAACGAGTACAATTGCCGCACA	ATGAACTATGACGCACCTGGCGTAAGATGAACGAGTACAATTGCCGCACA	ATGAACTATGACGCACCTGGCGTAAGATGAACGAGTACAATTGCCGCACA	ATGAACTATGACGCACCTGGCGTAAGATGAACGAGTACAATTGCCGCACA	ATGAACTATGACGCACCTGGCGTAAGATGAACGAGTACAATTGCCGCACA	ATGAACTATGACGCACCTGGCGTAAGATGAACGAGTACAATTGCCGCACA	ATGAACTATGACGCACCTGGCGTAAGATGAACGAGTACAATTGCCGCACA	ATGAACTATGACGCACCTGGCGTAAGATGAACGAGTACAATTGCCGCACA	ATGAACTATGACGCACCTGGCGTAAGATGAACGAGTACAATTGCCGCACA	ATGAACTATGACGCACCTGGCGTAAGATGAACGAGTACAATTGCCGCACA	ATGAACTATGACGCACCTGGCGTAAGATGAACGAGTACAATTGCCGCACA	ATGAACTATGACGCACCTGGCGTAAGATGAACGAGTACAATTGCCGCACA	ATGAACTATGACGCACCTGGCGTAAGATGAACGAGTACAATTGCCGCACA	ATGAACTATGACGCACCTGGCGTAAGATGAACGAGTACAATTGCCGCACA	ATGAACTATGACGCACCTGGCGTAAGATGAACGAGTACAATTGCCGCACA	ATGAACTATGACGCACCTGGCGTAAGATGAACGAGTACAATTGCCGCACA	ATGAACTATGACGCACCTGGCGTAAGATGAACGAGTACAATTGCCGCACA	ATGAACTATGACGCACCTGGCGTAAGATGAACGAGTACAATTGCCGCACA	ATGAACTATGACGCACCTGGCGTAAGATGAACGAGTACAATTGCCGCACA	ATGAACTATGACGCACCTGGCGTAAGATGAACGAGTACAATTGCCGCACA	ATGAACTATGACGCACCTGGCGTAAGATGAACGAGTACAATTGCCGCACA	ATGAACTATGACGCACCTGGCGTAAGATGAACGAGTACAATTGCCGCACA	ATGAACTATGACGCACCTGGCGTAAGATGAACGAGTACAATTGCCGCACA	ATGAACTATGACGCACCTGGCGTAAGATGAACGAGTACAATTGCCGCACA	ATGAACTATGACGCACCTGGCGTAAGATGAACGAGTACAATTGCCGCACA	ATGAACTATGACGCACCTGGCGTAAGATGAACGAGTACAATTGCCGCACA	ATGAACTATGACGCACCTGGCGTAAGATGAACGAGTACAATTGCCGCACA	ATGAACTATGACGCACCTGGCGTAAGATGAACGAGTACAATTGCCGCACA	ATGAACTATGACGCACCTGGCGTAAGATGAACGAGTACAATTGCCGCACA
102	CGCACTTTCTCAATATCTGGACTAGAGATGACATTAGTTCGCTGAGGATG	CGCACTTTCTCAATATCTGGACTAGAGATTACATTAGTTCGCTGAGGATG	CGCACTTTCTCAATATCTAGACTAGAGATTACATTAGTTCGCTGAGGATG	CGCACTTTCTCAATATATAGACTAGAGATTACATTAGTTCGCTGAGGATG	CGCACTTTCTCAATATATAGACTACAGATTACATTAGTTCGCTGAGGATG	CGCACTTACTCAATATATAGACTACAGATTACATTAGTTCGCTGAGGATG	CGCACTTACTCAATATATAAACTACAGATTACATTAGTTCGCTGAGGATG	CGCACTTACTTAATATATAAACTACAGATTACATTAGTTCGCTGAGGATG	CGCACTTACTTAATATATAAACTACAGATTACAGTAGTTCGCTGAGGATG	CGCACTTACATAATATATAAACTACAGATTACAGTAGTTCGCTGAGGATG	CGCACTTACATAATATATAAACTACAGATTACAGTAGTTCGCTAAGGATG	AGCACTTACATAATATATAAACTACAGATTACAGTAGTTCGCTAAGGATG	AGAACTTACATAATATATAAACTACAGATTACAGTAGTTCGCTAAGGATG	AGAATTTACATAATATATAAACTACAGATTACAGTAGTTCGCTAAGGATG	AGAATTTACATAATATATAAACTACAGATTACAGTAATTCGCTAAGGATG	AGAATTTACATAATATATAAACTACATATTACAGTAATTCGCTAAGGATG	AGAATTTACATAATATATAAACTATATATTACAGTAATTCGCTAAGGATG	AGAATTTACATAATATATAAACTATATACTACAGTAATTCGCTAAGGATG	AGAATTTACATAATATATAAACTATATACTACAATAATTCGCTAAGGATG	AGAATTTACATAATATATAAACTATATACTACAATAATTCGCTAAGAATG	AGAATTTACATAATATATAAACTATATACTACTATAATTCGCTAAGAATG	AGAATTTACATAATATATAAACTATATACTACTATAAATCGCTAAGAATG	AGAATTTACATAATATATAAACTATATACTACTACAAATCGCTAAGAATG	AGAATTTACATAATATATAAACTATATACTACTACAAAACGCTAAGAATG	AGAATTTACATAATATATAAACTATATACTACTACAAAACGCTAAGAATG	AGAATTTACATAATATATAAACTATATACTACTACAAAACGCTAAGAATG	AGAATTTACATAATATATAAACTATATACTACTACAAAACGCTAAGAATG	AGAATTTACATAATATATAAACTATATACTACTACAAAACGCTAAGAATG	AGAATTTACATAATATATAAACTATATACTACTACAAAACGCTAAGAATG	AGAATTTACATAATATATAAACTATATACTACTACAAAACGCTAAGAATG	AGAATTTACATAATATATAAACTATATACTACTACAAAACGCTAAGAATG	AGAATTTACATAATATATAAACTATATACTACTACAAAACGCTAAGAATG	AGAATTTACATAATATATAAACTATATACTACTACAAAACGCTAAGAATG	AGAATTTACATAATATATAAACTATATACTACTACAAAACGCTAAGAATG	AGAATTTACATAATATATAAACTATATACTACTACAAAACGCTAAGAATG	AGAATTTACATAATATATAAACTATATACTACTACAAAACGCTAAGAATG	AGAATTTACATAATATATAAACTATATACTACTACAAAACGCTAAGAATG	AGAATTTACATAATATATAAACTATATACTACTACAAAACGCTAAGAATG	AGAATTTACATAATATATAAACTATATACTACTACAAAACGCTAAGAATG	AGAATTTACATAATATATAAACTATATACTACTACAAAACGCTAAGAATG	AGAATTTACATAATATATAAACTATATACTACTACAAAACGCTAAGAATG
103	CTATTCTTGTAGATATGCGTCACTTGAACCATGCACCGGTCGGCAGTGAT	CTATTCTTGTAGATATGCGTCACTTGAACCATACACCGGTCGGCAGTGAT	CTATTCCTGTAGATATGCGTCACTTGAACCATACACCGGTCGGCAGTGAT	CTATTCCTGTAGATATGAGTCACTTGAACCATACACCGGTCGGCAGTGAT	CTATTCCTGTAGATATGAGTGACTTGAACCATACACCGGTCGGCAGTGAT	CTATTCCTGTAGATATGAGAGACTTGAACCATACACCGGTCGGCAGTGAT	CTATTCCTGTAGATATGAGAGACATGAACCATACACCGGTCGGCAGTGAT	CTATTCCTGTAGATATGAGAGACAAGAACCATACACCGGTCGGCAGTGAT	CTATTCCTGTAGATATGAGAGACAAGAACCATACACCGGTCGGCAGTGAG	CTATTCCTGTAGATATGAGAGACAAGAACTATACACCGGTCGGCAGTGAG	CTATTCCTGTAGATATGAGAGACAAGAACTATACAACGGTCGGCAGTGAG	CTATTCCTGTAGATATGAGAGACAAGAACTATACAACGATCGGCAGTGAG	CTATTCCTGTAGATATGAGAGACAAGAACTATACAACGATCGACAGTGAG	CTATTCCTGTAGATATGAAAGACAAGAACTATACAACGATCGACAGTGAG	CTATTCCTGTAGATATGAAAGACAAGAACTATACAACGATCGAGAGTGAG	CTATTCCTGTAGATATGAAAGACAAGAACTATACAACGATCAAGAGTGAG	CTATTCCTGTAGATATGAAAGACAAGAACTATACAACGATCAAGAGTAAG	CTATTCCTGTAGATATGAAAGACAAGAACTATACAACGATCAAGACTAAG	CTATTCCTGTAGATATGAAAGACAAGAACTATACAACTATCAAGACTAAG	CTATTCCTATAGATATGAAAGACAAGAACTATACAACTATCAAGACTAAG	CAATTCCTATAGATATGAAAGACAAGAACTATACAACTATCAAGACTAAG	CAAGTCCTATAGATATGAAAGACAAGAACTATACAACTATCAAGACTAAG	AAAGTCCTATAGATATGAAAGACAAGAACTATACAACTATCAAGACTAAG	AAAGTCCTACAGATATGAAAGACAAGAACTATACAACTATCAAGACTAAG	AAAGTCCTACAAATATGAAAGACAAGAACTATACAACTATCAAGACTAAG	AAAGTCCTACAAATATGAAAGACAAGAACTATACAACTATAAAGACTAAG	AAAGTCCTACAAATATAAAAGACAAGAACTATACAACTATAAAGACTAAG	AAAGTCCTACAAATATACAAGACAAGAACTATACAACTATAAAGACTAAG	AAAGTCCTACAAATATACAAGACAAGAACTACACAACTATAAAGACTAAG	AAAGTCCTACAAATATACAAGACAAGAACTACAAAACTATAAAGACTAAG	AAAGTCCTACAAATATACAAGACAAGAACTACAAAACTACAAAGACTAAG	AAAGTCCTACAAATAAACAAGACAAGAACTACAAAACTACAAAGACTAAG	AAAGTCCTACAAATAAACAAGACAAGAACTACAAAACTACAAAGACTACG	AAAGTCCTACAAATAAACAAGACAAGAACTACAAAACTACAAAGACTACT	AAAGTCCTACAAATAAACAAGACAAGAACTACAAAACTACAAAGACTACT	AAAGTCCTACAAATAAACAAGACAAGAACTACAAAACTACAAAGACTACT	AAAGTCCTACAAATAAACAAGACAAGAACTACAAAACTACAAAGACTACT	AAAGTCCTACAAATAAACAAGACAAGAACTACAAAACTACAAAGACTACT	AAAGTCCTACAAATAAACAAGACAAGAACTACAAAACTACAAAGACTACT	AAAGTCCTACAAATAAACAAGACAAGAACTACAAAACTACAAAGACTACT	AAAGTCCTACAAATAAACAAGACAAGAACTACAAAACTACAAAGACTACT
104	GGGGTGGTACTCCTAGGTAAACTTCTCCCCGATGAATATGGGTCGTCCCG	GGGGTGGTACTCCTAGGTAAACTTCTCCCCGATGAATGTGGGTCGTCCCG	GGGGTGGTACTCCTAGGTAAACTTCTCCCCGAAGAATGTGGGTCGTCCCG	GGAGTGGTACTCCTAGGTAAACTTCTCCCCGAAGAATGTGGGTCGTCCCG	GGAGTGGTACTCCTAGGTAAACTTCTCCCCGAAGAATGTGGGTCGTCACG	AGAGTGGTACTCCTAGGTAAACTTCTCCCCGAAGAATGTGGGTCGTCACG	AGAGTGGTACTCCTAGGTAAACTTCTCCCCGAAGAATGTGGGACGTCACG	AGAGTGGTACTCCTAGGTAAACTTCTCCCCGAAGAATGTGGGACGTCAAG	AGAGTGGTACTCCTACGTAAACTTCTCCCCGAAGAATGTGGGACGTCAAG	AGAGTGTTACTCCTACGTAAACTTCTCCCCGAAGAATGTGGGACGTCAAG	AGAGTGTTACTACTACGTAAACTTCTCCCCGAAGAATGTGGGACGTCAAG	AGAGTGTTACTACTACATAAACTTCTCCCCGAAGAATGTGGGACGTCAAG	AGAGTGTTACTACTACATAAACTTCTACCCGAAGAATGTGGGACGTCAAG	AGAGTGTTACTACTACATAAACTACTACCCGAAGAATGTGGGACGTCAAG	AGAGTGTTACTACTACATAAACTACTACACGAAGAATGTGGGACGTCAAG	AGAGTGTTACTACTACATAAACTACTACAAGAAGAATGTGGGACGTCAAG	AGAGTGTTACTACTATATAAACTACTACAAGAAGAATGTGGGACGTCAAG	AGAGTGTTACTACTATATAAACTACTACAAGAAGAATGTGGGACGACAAG	AGAGTGTTACTACTATATAAACTACTACAAGAAGAATGTGTGACGACAAG	AGAGTGTTACTACTATATAAACTACTACAAGAAGAATGAGTGACGACAAG	AGAGTGTTACTACTATATAAACTACTACAAGAACAATGAGTGACGACAAG	AGAGTGTTACTACTATATAAACTACTACAATAACAATGAGTGACGACAAG	AGAGTGTTACTACTATATAAACTACTACAATAACAATGACTGACGACAAG	AGAGTGTTACTACTATATAAACTACTACATTAACAATGACTGACGACAAG	AGAGTGTTACAACTATATAAACTACTACATTAACAATGACTGACGACAAG	AGAGTGTTACAACTATATAAACTACTACATTAACAATGACTGAAGACAAG	AGAGTGTTACAACTATATAAACTACTACATTAACAATGACTGAAGATAAG	AGAGTGTTACAAATATATAAACTACTACATTAACAATGACTGAAGATAAG	AGAGTGTTACATATATATAAACTACTACATTAACAATGACTGAAGATAAG	AGAGTTTTACATATATATAAACTACTACATTAACAATGACTGAAGATAAG	AGAGTTATACATATATATAAACTACTACATTAACAATGACTGAAGATAAG	AGAGTTATATATATATATAAACTACTACATTAACAATGACTGAAGATAAG	AGAATTATATATATATATAAACTACTACATTAACAATGACTGAAGATAAG	AGAATTACATATATATATAAACTACTACATTAACAATGACTGAAGATAAG	AGAATTACATATATATATAAATTACTACATTAACAATGACTGAAGATAAG	AGAATTACATATATATATAAATTACTACATTAACAATGACTGAAGATAAG	AGAATTACATATATATATAAATTACTACATTAACAATGACTGAAGATAAG	AGAATTACATATATATATAAATTACTACATTAACAATGACTGAAGATAAG	AGAATTACATATATATATAAATTACTACATTAACAATGACTGAAGATAAG	AGAATTACATATATATATAAATTACTACATTAACAATGACTGAAGATAAG	AGAATTACATATATATATAAATTACTACATTAACAATGACTGAAGATAAG
105	TATAGTTACCGAAACACCGAGTCTTACTTGACCACGGTTCGGACCGCCCA	TATAGTTACCGAAACACCGAGTCTTACTTGACCACGGTTCGGACCGCACA	TATAGTTACAGAAACACCGAGTCTTACTTGACCACGGTTCGGACCGCACA	TATAGTTACAGAAACACCAAGTCTTACTTGACCACGGTTCGGACCGCACA	TATAGTTACAGAAACACCAAGACTTACTTGACCACGGTTCGGACCGCACA	TATAGTTACAGAAACACCAAGACTTACTTGACCAAGGTTCGGACCGCACA	TATAATTACAGAAACACCAAGACTTACTTGACCAAGGTTCGGACCGCACA	TATAATTACAGAAACACCAAGACTTACTTGACCAAGGTTCGGACCGTACA	TATAATTACAGAAACAACAAGACTTACTTGACCAAGGTTCGGACCGTACA	TATAATTACAGAAACTACAAGACTTACTTGACCAAGGTTCGGACCGTACA	TATAATTACAGAAACTACAAGACTTAATTGACCAAGGTTCGGACCGTACA	TACAATTACAGAAACTACAAGACTTAATTGACCAAGGTTCGGACCGTACA	TACAATTACAGAAACTACAAGATTTAATTGACCAAGGTTCGGACCGTACA	TACAATTACAGAAACTACAAGATTTAATTGACCAAGGTTCGGAACGTACA	TACAATTACAGAAACTACAAGATTTAATTGACCAAGGTTCGGAAAGTACA	TACAATTACAGAAACTACAAGATTTAATTGACCAAGGTTCGGAAACTACA	TACAATTACAGAAACTACAAGATTTAATTGACCAAGGTTCGAAAACTACA	TACAATTACAGAAACTACAAGATTTAATTGACCAAGGTTCTAAAACTACA	TACAATTACAGAAACTACAAGATTTAATTGACCAAGATTCTAAAACTACA	TACAATTACAGAAACTACAAGATTTAATTGACCAAGATACTAAAACTACA	TACAATTACAGAAACTACAAGATTTAATTGACCAAGATACTAAGACTACA	TACAATTACAGAAACTACAAGATTTAATTGATCAAGATACTAAGACTACA	TACAATTACAGAAACTACAAGATTTAATTAATCAAGATACTAAGACTACA	TACAATTACAGAAACTACAAGATTTAATTAATCAAGATACTAAGACTACT	TACAATTACAGAAACTACAAGATTTAATTAATCAAGATACAAAGACTACT	TACAATTACAGAAACTACAAGATTTAATTAATCAAGACACAAAGACTACT	TACAATTACAGAAACTACAAGATTTAATTAAACAAGACACAAAGACTACT	TACAATTACAGAAACTACAAGATTTAATTAAACAAGACAAAAAGACTACT	TACAATTACAGAAACTACAAGATTTAAATAAACAAGACAAAAAGACTACT	TACAATTACAGAAACTACAAGATTTAAATAAACAAGACAAGAAGACTACT	TACAATTACAGAAACTACAAGATTTAAATAAACAAGACAAGAAGACTACT	TACAATTACAGAAACTACAAGATTTAAATAAACAAGACAAGAAGACTACT	TACAATTACAGAAACTACAAGATTTAAATAAACAAGACAAGAAGACTACT	TACAATTACAGAAACTACAAGATTTAAATAAACAAGACAAGAAGACTACT	TACAATTACAGAAACTACAAGATTTAAATAAACAAGACAAGAAGACTACT	TACAATTACAGAAACTACAAGATTTAAATAAACAAGACAAGAAGACTACT	TACAATTACAGAAACTACAAGATTTAAATAAACAAGACAAGAAGACTACT	TACAATTACAGAAACTACAAGATTTAAATAAACAAGACAAGAAGACTACT	TACAATTACAGAAACTACAAGATTTAAATAAACAAGACAAGAAGACTACT	TACAATTACAGAAACTACAAGATTTAAATAAACAAGACAAGAAGACTACT	TACAATTACAGAAACTACAAGATTTAAATAAACAAGACAAGAAGACTACT
106	ATGCGACGCCACCAAAACCGAGGAAGTCCGCTTCAACAGAACGTCTTGTT	AGGCGACGCCACCAAAACCGAGGAAGTCCGCTTCAACAGAACGTCTTGTT	AGGCGACGCCACCAAAACCGAGGAAGTCCGCTTCAACAGAACGTCTAGTT	AGGCGACGCCACCAAAACCGAAGAAGTCCGCTTCAACAGAACGTCTAGTT	AGGCGACGCCACCAAAACCGAAGAAGTCCGCTACAACAGAACGTCTAGTT	AGGCGACGCCACCAAGACCGAAGAAGTCCGCTACAACAGAACGTCTAGTT	AGGCGAAGCCACCAAGACCGAAGAAGTCCGCTACAACAGAACGTCTAGTT	AGACGAAGCCACCAAGACCGAAGAAGTCCGCTACAACAGAACGTCTAGTT	AGACAAAGCCACCAAGACCGAAGAAGTCCGCTACAACAGAACGTCTAGTT	AGACAAAGCCACCAAGACCGAAGAAGTCCGCTACAAGAGAACGTCTAGTT	AGACAAAGCCACCAAGACCGAAGAAGTCAGCTACAAGAGAACGTCTAGTT	AGACAAAGCCACCAAGACCGAAGAAGTCAGATACAAGAGAACGTCTAGTT	AGACAAAGCCACCAAGACCGAAGAAGTAAGATACAAGAGAACGTCTAGTT	AGACAAAGCCACCAAGACCGAAGAAGCAAGATACAAGAGAACGTCTAGTT	AGACAAAGCCACCAAGACCGAAGAAGCAAGATACAAGAGAACGTATAGTT	AGACAAAGCCACCAAGACCGAAGAAGCAAGATACAAGAGAACGTATAGAT	AGACAAAGCTACCAAGACCGAAGAAGCAAGATACAAGAGAACGTATAGAT	AGACAAAGCTACCAAGACCTAAGAAGCAAGATACAAGAGAACGTATAGAT	AGACAAAGCTACCAAGACATAAGAAGCAAGATACAAGAGAACGTATAGAT	AGACAAAGCTACCAAGAAATAAGAAGCAAGATACAAGAGAACGTATAGAT	AGACAAAGCTACCAAGAAATAAGAATCAAGATACAAGAGAACGTATAGAT	AGACAAAGCTACCAAGAAATAAGAATCAAGATACAAGAAAACGTATAGAT	AGACAAAGCTACCAAGAAATAAGAATCAAGATACAAGAAAAAGTATAGAT	AGACAAAGCTACCAAGAAATAAGAATCAAGATACAAGAAAAACTATAGAT	AGACAAAGCTACCAAGAAATAAGAATCAAGATACAAGAAGAACTATAGAT	AGACAAAGCTACCAAGAAATAAGAATCAAGATACAAGAAGAACTATATAT	AGACAAAGCTAACAAGAAATAAGAATCAAGATACAAGAAGAACTATATAT	AGACAAAGCAAACAAGAAATAAGAATCAAGATACAAGAAGAACTATATAT	AGAAAAAGCAAACAAGAAATAAGAATCAAGATACAAGAAGAACTATATAT	AGAAAAAGCAAACAAGAAATAAGAATCAAGATACAAGAAGAACTATATAT	AGAAAAAGCAAACAAGAAATAAGAATCAAGATACAAGAAGAACTATATAT	AGAAAAAGCAAACAAGAAATAAGAATCAAGATACAAGAAGAACTATATAT	AGAAAAAGCAAACAAGAAATAAGAATCAAGATACAAGAAGAACTATATAT	AGAAAAAGCAAACAAGAAATAAGAATCAAGATACAAGAAGAACTATATAT	AGAAAAAGCAAACAAGAAATAAGAATCAAGATACAAGAAGAACTATATAT	AGAAAAAGCAAACAAGAAATAAGAATCAAGATACAAGAAGAACTATATAT	AGAAAAAGCAAACAAGAAATAAGAATCAAGATACAAGAAGAACTATATAT	AGAAAAAGCAAACAAGAAATAAGAATCAAGATACAAGAAGAACTATATAT	AGAAAAAGCAAACAAGAAATAAGAATCAAGATACAAGAAGAACTATATAT	AGAAAAAGCAAACAAGAAATAAGAATCAAGATACAAGAAGAACTATATAT	AGAAAAAGCAAACAAGAAATAAGAATCAAGATACAAGAAGAACTATATAT
107	CTTGTAAACGATTAGGCGAACATAATCCAACCTAAGTAATCGCGATCAAT	CTTGTAAACGATTAGGCGAACATAATCCAACCTAAGTAATCGCGATCAAG	CTTGCAAACGATTAGGCGAACATAATCCAACCTAAGTAATCGCGATCAAG	CTTACAAACGATTAGGCGAACATAATCCAACCTAAGTAATCGCGATCAAG	CTTACAAACGATTAGGCGAACATAATCCAAGCTAAGTAATCGCGATCAAG	CTTACAAACGATTAAGCGAACATAATCCAAGCTAAGTAATCGCGATCAAG	CTTACAAACGATTAAGCGAACATAATCCAAGATAAGTAATCGCGATCAAG	CTTACAAACGATTAAGCGAAGATAATCCAAGATAAGTAATCGCGATCAAG	CTTACAAACGATTAAGCTAAGATAATCCAAGATAAGTAATCGCGATCAAG	CTTACAAACTATTAAGCTAAGATAATCCAAGATAAGTAATCGCGATCAAG	CTTACAAACTATTAAGCTAAGAAAATCCAAGATAAGTAATCGCGATCAAG	CTTACAAACTATTAAGCTAAGAAAATCCAAGACAAGTAATCGCGATCAAG	CTTACAAACTATTAAGCTAAGAAAATACAAGACAAGTAATCGCGATCAAG	CTTACAAACTATTAAGCTAAGAAAATACAAGACAAGTAATCGCAATCAAG	CTTACAAACTATTAAGCTAAGAAAATACAAGACAAGAAATCGCAATCAAG	CTTACAAACTATTAAGCTAAGAAAATACAAGACAAGAAATAGCAATCAAG	CTTACAAACTATTAAGCTAAGAAAATACAAGACAAGAAATAGCAAGCAAG	GTTACAAACTATTAAGCTAAGAAAATACAAGACAAGAAATAGCAAGCAAG	GTTACAAACTATTAAGCTAAGAAAATACAAGACAAGAATTAGCAAGCAAG	GTTACAAACTATTAAGATAAGAAAATACAAGACAAGAATTAGCAAGCAAG	GTTACAAACTATTAAGACAAGAAAATACAAGACAAGAATTAGCAAGCAAG	GTTACAAACTATTAAGACAAGAAACTACAAGACAAGAATTAGCAAGCAAG	GTTACAAACTATAAAGACAAGAAACTACAAGACAAGAATTAGCAAGCAAG	GTTACAAACTATAAAGTCAAGAAACTACAAGACAAGAATTAGCAAGCAAG	GTTACATACTATAAAGTCAAGAAACTACAAGACAAGAATTAGCAAGCAAG	GTTATATACTATAAAGTCAAGAAACTACAAGACAAGAATTAGCAAGCAAG	GTTATATACTATAAAGTCAAGAAACTACAAGACAAGAATTAGCAAGCAAG	GTTATATACTATAAAGTCAAGAAACTACAAGACAAGAATTAGCAAGCAAG	GTTATATACTATAAAGTCAAGAAACTACAAGACAAGAATTAGCAAGCAAG	GTTATATACTATAAAGTCAAGAAACTACAAGACAAGAATTAGCAAGCAAG	GTTATATACTATAAAGTCAAGAAACTACAAGACAAGAATTAGCAAGCAAG	GTTATATACTATAAAGTCAAGAAACTACAAGACAAGAATTAGCAAGCAAG	GTTATATACTATAAAGTCAAGAAACTACAAGACAAGAATTAGCAAGCAAG	GTTATATACTATAAAGTCAAGAAACTACAAGACAAGAATTAGCAAGCAAG	GTTATATACTATAAAGTCAAGAAACTACAAGACAAGAATTAGCAAGCAAG	GTTATATACTATAAAGTCAAGAAACTACAAGACAAGAATTAGCAAGCAAG	GTTATATACTATAAAGTCAAGAAACTACAAGACAAGAATTAGCAAGCAAG	GTTATATACTATAAAGTCAAGAAACTACAAGACAAGAATTAGCAAGCAAG	GTTATATACTATAAAGTCAAGAAACTACAAGACAAGAATTAGCAAGCAAG	GTTATATACTATAAAGTCAAGAAACTACAAGACAAGAATTAGCAAGCAAG	GTTATATACTATAAAGTCAAGAAACTACAAGACAAGAATTAGCAAGCAAG
108	GAATGTAAGGTAGCCAGGATCAAGGACGGGTTACCCCAATGCGAGTCTAA	GAATGTAAGGTAGCCAGGATCAAGGACGGGTTACCCCAATGCGAGTCAAA	GAATTTAAGGTAGCCAGGATCAAGGACGGGTTACCCCAATGCGAGTCAAA	GAATTTAAGGTAGCCAGGATCAAGGACGGGTTACCCCAATGCGAGTCAAG	GAATTTAAGGTAGCCAGGATCAAGGACGAGTTACCCCAATGCGAGTCAAG	GAATTTAAGGTAGCCAGGATCAAGAACGAGTTACCCCAATGCGAGTCAAG	GAATTTAAGGTAGCCAGGATCAAGAACGAGTTACACCAATGCGAGTCAAG	GAATTTAAGGTAGCCAAGATCAAGAACGAGTTACACCAATGCGAGTCAAG	GAATTTAAGGTAGACAAGATCAAGAACGAGTTACACCAATGCGAGTCAAG	GAATTTAAGGTAAACAAGATCAAGAACGAGTTACACCAATGCGAGTCAAG	GAATTTAAGGTAAACAAGATCAAGAACGAGTTACAACAATGCGAGTCAAG	GAATTTAAGGTAAACAAGATCAAGAACGAGTTACAACAATGCAAGTCAAG	GAATTTAAGGTAAACAAGATCAAGAACGAGTTACAACAAAGCAAGTCAAG	GAATTTAAGGTAAACAAGATCAAGAACGAGTTACTACAAAGCAAGTCAAG	GAATTTAAGGTAAACAAGATCAAGAACGAGTTACTACAAAGCAAGACAAG	GAATTTAAGGTAAACAAGATCAAGAACAAGTTACTACAAAGCAAGACAAG	GAATTTAAGGTAAACAAGATCAAGAACAAATTACTACAAAGCAAGACAAG	GAATTTAAGGTAAACAAGATCAAGAAAAAATTACTACAAAGCAAGACAAG	GTATTTAAGGTAAACAAGATCAAGAAAAAATTACTACAAAGCAAGACAAG	GTATTTAAGATAAACAAGATCAAGAAAAAATTACTACAAAGCAAGACAAG	GTATTTAAGATAAACAAGATCAAGACAAAATTACTACAAAGCAAGACAAG	GTATTTAAGATAAACAAGATCAAGACAAGATTACTACAAAGCAAGACAAG	GTACTTAAGATAAACAAGATCAAGACAAGATTACTACAAAGCAAGACAAG	GTACATAAGATAAACAAGATCAAGACAAGATTACTACAAAGCAAGACAAG	GTACATAAGATAAACAAGATCAAGACAAGATTACTACAAAGCAAGACAAG	GTACATAAGATAAACAAGATCAAGACAAGATTACTACAAAGCAAGACAAG	GTACATAAGATAAACAAGATCAAGACAAGATTACTACAAAGCAAGACAAG	GTACATAAGATAAACAAGATCAAGACAAGATTACTACAAAGCAAGACAAG	GTACATAAGATAAACAAGATCAAGACAAGATTACTACAAAGCAAGACAAG	GTACATAAGATAAACAAGATCAAGACAAGATTACTACAAAGCAAGACAAG	GTACATAAGATAAACAAGATCAAGACAAGATTACTACAAAGCAAGACAAG	GTACATAAGATAAACAAGATCAAGACAAGATTACTACAAAGCAAGACAAG	GTACATAAGATAAACAAGATCAAGACAAGATTACTACAAAGCAAGACAAG	GTACATAAGATAAACAAGATCAAGACAAGATTACTACAAAGCAAGACAAG	GTACATAAGATAAACAAGATCAAGACAAGATTACTACAAAGCAAGACAAG	GTACATAAGATAAACAAGATCAAGACAAGATTACTACAAAGCAAGACAAG	GTACATAAGATAAACAAGATCAAGACAAGATTACTACAAAGCAAGACAAG	GTACATAAGATAAACAAGATCAAGACAAGATTACTACAAAGCAAGACAAG	GTACATAAGATAAACAAGATCAAGACAAGATTACTACAAAGCAAGACAAG	GTACATAAGATAAACAAGATCAAGACAAGATTACTACAAAGCAAGACAAG	GTACATAAGATAAACAAGATCAAGACAAGATTACTACAAAGCAAGACAAG
109	ACACAGCTGGAAGGTAGCGCCGACTGGGTTACAACTGGAAATCCGTGTAG	ACACAGCTGGAAGGTAGCGCCGACTGGGTTACAACTGGAAATCCGTGAAG	ACACAGCTGGAAGGTAGCGCCGACTGGATTACAACTGGAAATCCGTGAAG	ACACAGCTAGAAGGTAGCGCCGACTGGATTACAACTGGAAATCCGTGAAG	AGACAGCTAGAAGGTAGCGCCGACTGGATTACAACTGGAAATCCGTGAAG	AGACAGCTAGAAGGTAGCGCCGACTGGATTACAACTGGAAATCCGTCAAG	AGACAGCAAGAAGGTAGCGCCGACTGGATTACAACTGGAAATCCGTCAAG	AGACAGCAAGAAGGTAGCGCCGACTGGATTACAACTAGAAATCCGTCAAG	AGACAGCAAGAAGGTAGCGCCGACTGGATTACAACTACAAATCCGTCAAG	AGACAGCAAGAAGGTAGCGCCGACTGGATTACAACTACAAAGCCGTCAAG	AGACAGCAAGAAGGTAGCGACGACTGGATTACAACTACAAAGCCGTCAAG	AGACAGCAAGAAGGTAGCTACGACTGGATTACAACTACAAAGCCGTCAAG	AGACAGCAAGAAGATAGCTACGACTGGATTACAACTACAAAGCCGTCAAG	AGACAGCAAGAAGATAACTACGACTGGATTACAACTACAAAGCCGTCAAG	AGACAGCAAGAAGATAACTACGACTAGATTACAACTACAAAGCCGTCAAG	AGACAGCAAGAAGATAACTACGACAAGATTACAACTACAAAGCCGTCAAG	AGACAGCAAGAAGATTACTACGACAAGATTACAACTACAAAGCCGTCAAG	AGACAGCAAGAAGATTACTACGACAAGATTACAACTACAAAGCAGTCAAG	AGACAGCAAGAAGATTACTACGACAAGATTACAACTACAAAGCAATCAAG	AGACAGCAAGAAGATTACTACGACAAGATTACAACTACAAAGCAAGCAAG	AGACAGCAAGAAGACTACTACGACAAGATTACAACTACAAAGCAAGCAAG	AGACAGCAAGAAGACTACTACGACAAGATTACTACTACAAAGCAAGCAAG	AGACAGCAAGAAGACTACTACGACAAGATTACTACTACAAAGCAAGCAAG	AGACAGCAAGAAGACTACTACGACAAGATTACTACTACAAAGCAAGCAAG	AGACAGCAAGAAGACTACTACGACAAGATTACTACTACAAAGCAAGCAAG	AGACAGCAAGAAGACTACTACGACAAGATTACTACTACAAAGCAAGCAAG	AGACAGCAAGAAGACTACTACGACAAGATTACTACTACAAAGCAAGCAAG	AGACAGCAAGAAGACTACTACGACAAGATTACTACTACAAAGCAAGCAAG	AGACAGCAAGAAGACTACTACGACAAGATTACTACTACAAAGCAAGCAAG	AGACAGCAAGAAGACTACTACGACAAGATTACTACTACAAAGCAAGCAAG	AGACAGCAAGAAGACTACTACGACAAGATTACTACTACAAAGCAAGCAAG	AGACAGCAAGAAGACTACTACGACAAGATTACTACTACAAAGCAAGCAAG	AGACAGCAAGAAGACTACTACGACAAGATTACTACTACAAAGCAAGCAAG	AGACAGCAAGAAGACTACTACGACAAGATTACTACTACAAAGCAAGCAAG	AGACAGCAAGAAGACTACTACGACAAGATTACTACTACAAAGCAAGCAAG	AGACAGCAAGAAGACTACTACGACAAGATTACTACTACAAAGCAAGCAAG	AGACAGCAAGAAGACTACTACGACAAGATTACTACTACAAAGCAAGCAAG	AGACAGCAAGAAGACTACTACGACAAGATTACTACTACAAAGCAAGCAAG	AGACAGCAAGAAGACTACTACGACAAGATTACTACTACAAAGCAAGCAAG	AGACAGCAAGAAGACTACTACGACAAGATTACTACTACAAAGCAAGCAAG	AGACAGCAAGAAGACTACTACGACAAGATTACTACTACAAAGCAAGCAAG
110	TGGTTCGATTGTGGGTCCAGGATGCGCCACGTTAATCGGTACACCGACGG	TGGTTCGATTGTGGGTCCAGGATTCGCCACGTTAATCGGTACACCGACGG	TGGTTCGATTGTGGGTCCAGGATTCGCCACGTGAATCGGTACACCGACGG	TGGTTCGATTGTGGGTCCAGGATTCGCCACGTGAATCGGTACACCGAAGG	TGGTTCGATTGTGGGTCCAAGATTCGCCACGTGAATCGGTACACCGAAGG	TGGTTCGATTGTTGGTCCAAGATTCGCCACGTGAATCGGTACACCGAAGG	TGGTTCGATTGTTGGTCCAAGATTCGCCACGTGAATCGGTACACCCAAGG	TGGTTCGATTGTTGGTCCAAGATTCGCCACGTGAATCGGTACACCCAAGA	TGGTTCGATTGTTGGTCCAAGATTCGCCACGTGAATCGGTACACACAAGA	TGGTTCGATTGTTGGTCCAAGATTCACCACGTGAATCGGTACACACAAGA	TGGTTCGATTGTTGGTCCAAGATTCACCAAGTGAATCGGTACACACAAGA	AGGTTCGATTGTTGGTCCAAGATTCACCAAGTGAATCGGTACACACAAGA	AGATTCGATTGTTGGTCCAAGATTCACCAAGTGAATCGGTACACACAAGA	AGATTCGATTGTTGGTCCAAGATTCACCAAGTGAATCAGTACACACAAGA	AGATTCGATTGTTGGTCCAAGATTCACCAAGTGAATCAGTACAGACAAGA	AGATTCGATTGTTAGTCCAAGATTCACCAAGTGAATCAGTACAGACAAGA	AGATTCGATTGTTAGTCCAAGATTTACCAAGTGAATCAGTACAGACAAGA	AGATTCAATTGTTAGTCCAAGATTTACCAAGTGAATCAGTACAGACAAGA	AGATTCAATTGTTAGTTCAAGATTTACCAAGTGAATCAGTACAGACAAGA	AGATTCAATTGTTAATTCAAGATTTACCAAGTGAATCAGTACAGACAAGA	AGATTCAAGTGTTAATTCAAGATTTACCAAGTGAATCAGTACAGACAAGA	AGATTCAAGAGTTAATTCAAGATTTACCAAGTGAATCAGTACAGACAAGA	AGAATCAAGAGTTAATTCAAGATTTACCAAGTGAATCAGTACAGACAAGA	AGAATCAAGATTTAATTCAAGATTTACCAAGTGAATCAGTACAGACAAGA	AGAATCAAGATTTAATTCAAGATTTACCAAGTGAAACAGTACAGACAAGA	AGAAACAAGATTTAATTCAAGATTTACCAAGTGAAACAGTACAGACAAGA	AGAAACAAGATTTAATTCAAGATTTACCAAGTGAAAAAGTACAGACAAGA	AGAAACAAGATTTAATTCAAGATTTACCAAGTCAAAAAGTACAGACAAGA	AGAAACAAGATTTAATTCAAGATTTACCAAGTCAAGAAGTACAGACAAGA	AGAAACAAGATTTAATTCAAGATTTACAAAGTCAAGAAGTACAGACAAGA	AGAAACAAGATTTAATTCAAGAGTTACAAAGTCAAGAAGTACAGACAAGA	AGAAACAAGATTTAATTCAAGAGTTACAAAGTCAAGAATTACAGACAAGA	AGAAACAAGATTTAATTCAAGAGTTACAAAGTCAAGATTTACAGACAAGA	AGAAACAAGATTTAATTCAAGACTTACAAAGTCAAGATTTACAGACAAGA	AGAAACAAGATTTAATACAAGACTTACAAAGTCAAGATTTACAGACAAGA	AGAAACAAGATTTTATACAAGACTTACAAAGTCAAGATTTACAGACAAGA	AGAAACAAGATATTATACAAGACTTACAAAGTCAAGATTTACAGACAAGA	AGAAACAAGAAATTATACAAGACTTACAAAGTCAAGATTTACAGACAAGA	AGAAACAAGAAATTATACAAGAATTACAAAGTCAAGATTTACAGACAAGA	AGAAACAAGAAACTATACAAGAATTACAAAGTCAAGATTTACAGACAAGA	AGAAACAAGAAACTATATAAGAATTACAAAGTCAAGATTTACAGACAAGA
111	GTGCGTTTCGCTACTCGAACGTATTAGCTCCTAAAATGAAGTCGTGGTTG	GTGCGTTTCGCTACTCGAACGTATTAGCTACTAAAATGAAGTCGTGGTTG	GTGCGTTTCGCTACTCGAACGTATTAGCTACTAAAATGAAGTCGTGGGTG	GTGCGTTTCGCTACTCGAACGTATAAGCTACTAAAATGAAGTCGTGGGTG	GTGCGTTTCGCTACTCGAACGTATAAACTACTAAAATGAAGTCGTGGGTG	GTGCGTTTAGCTACTCGAACGTATAAACTACTAAAATGAAGTCGTGGGTG	GTGCGTTTAGCTACACGAACGTATAAACTACTAAAATGAAGTCGTGGGTG	GTGCGTTTAGCTACACGAACGTATAAACTACTAAAATGAAGTCGTGCGTG	GTGCGTTTAGCTACAAGAACGTATAAACTACTAAAATGAAGTCGTGCGTG	GTACGTTTAGCTACAAGAACGTATAAACTACTAAAATGAAGTCGTGCGTG	GTACGTTTAGCTACAAGAACGTATAAACTACTAAAATGAAGTCTTGCGTG	GTACGTTTAGCTACAAGAAAGTATAAACTACTAAAATGAAGTCTTGCGTG	GTACGTTTAGCTACAAGAAACTATAAACTACTAAAATGAAGTCTTGCGTG	GTACATTTAGCTACAAGAAACTATAAACTACTAAAATGAAGTCTTGCGTG	TTACATTTAGCTACAAGAAACTATAAACTACTAAAATGAAGTCTTGCGTG	TTACATTTAGCTACAAGAAACTATAAACTACTAAAATGAAGTCTAGCGTG	TTACATTTAGCTACAAGAAACTATAAACTACTAAAATGAAGTCTAGCGAG	TTACATTTAGCTACAAGAAACTATAAACTACTAAAATGAAGTCTAGCAAG	TTACATTTAGCTACAAGAAACTATAAACTACTAAAATGAAGACTAGCAAG	TTACATTTAGCTACAAGAAACTATAAACTACTAAACTGAAGACTAGCAAG	TTACATTTAGCTACAAGAAACTATAAACTACTAAACTGAAGACAAGCAAG	TTACATATAGCTACAAGAAACTATAAACTACTAAACTGAAGACAAGCAAG	TTACATACAGCTACAAGAAACTATAAACTACTAAACTGAAGACAAGCAAG	TTACATACAGATACAAGAAACTATAAACTACTAAACTGAAGACAAGCAAG	TTACATACAGATACAAGAAACTATATACTACTAAACTGAAGACAAGCAAG	TTACATACAGATACAAGAAACTATATACTACAAAACTGAAGACAAGCAAG	TTACATACAGATACAAGAAACTATATACTACAAAACTCAAGACAAGCAAG	TTACATACAGATACAAGAAACTATATACTACAAAAGTCAAGACAAGCAAG	TTACATACAGATACAAGAAACTATATACTATAAAAGTCAAGACAAGCAAG	TTACATACATATACAAGAAACTATATACTATAAAAGTCAAGACAAGCAAG	TTACATATATATACAAGAAACTATATACTATAAAAGTCAAGACAAGCAAG	TTACATATATATACAAGAAACTACATACTATAAAAGTCAAGACAAGCAAG	TTACATATATATACAAGAAACTACATACTATATAAGTCAAGACAAGCAAG	TTACATATATATACAAGAAACTACATACTATATAAATCAAGACAAGCAAG	TTACATATATATACAAGAAACTACATACTATATAAATCAAGACAAGCAAG	TTACATATATATACAAGAAACTACATACTATATAAATCAAGACAAGCAAG	TTACATATATATACAAGAAACTACATACTATATAAATCAAGACAAGCAAG	TTACATATATATACAAGAAACTACATACTATATAAATCAAGACAAGCAAG	TTACATATATATACAAGAAACTACATACTATATAAATCAAGACAAGCAAG	TTACATATATATACAAGAAACTACATACTATATAAATCAAGACAAGCAAG	TTACATATATATACAAGAAACTACATACTATATAAATCAAGACAAGCAAG
112	TCTAGTGCATGAGGCATGGACACGGGTATTCGTGTCTACTGGAGCGACCA	TCTAGTGCATGATGCATGGACACGGGTATTCGTGTCTACTGGAGCGACCA	TCTAGTGCATGATGCAAGGACACGGGTATTCGTGTCTACTGGAGCGACCA	TCTAGTGCATGATGCAAGGACAAGGGTATTCGTGTCTACTGGAGCGACCA	TCTAGTGCATGATGCAAGAACAAGGGTATTCGTGTCTACTGGAGCGACCA	TCCAGTGCATGATGCAAGAACAAGGGTATTCGTGTCTACTGGAGCGACCA	TCCAGTGCATGATGCAAGAACAAGGGTATTCGTGTCTACTGGAGCTACCA	TCCAGTGCATGATGCAAGAACAAGAGTATTCGTGTCTACTGGAGCTACCA	TCCAGTGCATGATGCAAGAACAAGAGTATTCGAGTCTACTGGAGCTACCA	TCCAGTGCATGATGCAAGAACAAGAGTATTCGAGTATACTGGAGCTACCA	TCCAGTGCATGATGCAAGAACAAGAGTATTCGAGTATACTGGAGCTACAA	TCCAGTGCATGATGCAAGAACAAGAGTATTCGAGTATACAGGAGCTACAA	TCCAGTGCATGATGCAAGAACAAGAGTATTCGAGTATACAAGAGCTACAA	TCCAGTTCATGATGCAAGAACAAGAGTATTCGAGTATACAAGAGCTACAA	TCCAGTTCATGATGCAAGAACAAGAGTATTCGAGTATACAAGAACTACAA	TCCAGTTCATGATGCAAGAACAAGAGTATTCGACTATACAAGAACTACAA	TCCAGTTCATGATGCAAGAACAAGAGTATTCGACTACACAAGAACTACAA	TCCAGTTCATGATGCAAGAACAAGAGTATACGACTACACAAGAACTACAA	TCCAGTTCATGATGCAAGAACAAGAGTATACTACTACACAAGAACTACAA	TCCAGTTCATGATGCAAGAACAAGAGTCTACTACTACACAAGAACTACAA	TCCAGTTCATGATGCAAGTACAAGAGTCTACTACTACACAAGAACTACAA	TCCAGTTCATGATGAAAGTACAAGAGTCTACTACTACACAAGAACTACAA	TCCAGTTCATGATGAAACTACAAGAGTCTACTACTACACAAGAACTACAA	TCCAGTTCATGATGAAACTACAAGAGACTACTACTACACAAGAACTACAA	TCCAGTTCATGATGACACTACAAGAGACTACTACTACACAAGAACTACAA	TCCAGTTCATGATGACACTACAAGAGACTACTACTACACAAGAACTACTA	TCCAGTTCATGATGACACTACAAGAGACTACTACTACACAAGAACTACTA	TCCAGTTCATGATGACACTACAAGAGACTACTACTACACAAGAACTACTA	TCCAGTTCATGATGACACTACAAGAGACTACTACTACACAAGAACTACTA	TCCAGTTCATGATGACACTACAAGAGACTACTACTACACAAGAACTACTA	TCCAGTTCATGATGACACTACAAGAGACTACTACTACACAAGAACTACTA	TCCAGTTCATGATGACACTACAAGAGACTACTACTACACAAGAACTACTA	TCCAGTTCATGATGACACTACAAGAGACTACTACTACACAAGAACTACTA	TCCAGTTCATGATGACACTACAAGAGACTACTACTACACAAGAACTACTA	TCCAGTTCATGATGACACTACAAGAGACTACTACTACACAAGAACTACTA	TCCAGTTCATGATGACACTACAAGAGACTACTACTACACAAGAACTACTA	TCCAGTTCATGATGACACTACAAGAGACTACTACTACACAAGAACTACTA	TCCAGTTCATGATGACACTACAAGAGACTACTACTACACAAGAACTACTA	TCCAGTTCATGATGACACTACAAGAGACTACTACTACACAAGAACTACTA	TCCAGTTCATGATGACACTACAAGAGACTACTACTACACAAGAACTACTA	TCCAGTTCATGATGACACTACAAGAGACTACTACTACACAAGAACTACTA
113	GGCCAAGCGAGGTTGCGCCTAACTGCTCTTATGCTTGCTGGTGCGATCTA	GGCCAAGCGAGGTTGCGCCTAACTGCTCTTATACTTGCTGGTGCGATCTA	GGCCAAGCGAGGTTGCGCCTAACTACTCTTATACTTGCTGGTGCGATCTA	GGCCAAGCGAGGTTGCGCCTAACTACTATTATACTTGCTGGTGCGATCTA	GTCCAAGCGAGGTTGCGCCTAACTACTATTATACTTGCTGGTGCGATCTA	GTCCAAGCGAGGTTGCGCCAAACTACTATTATACTTGCTGGTGCGATCTA	GTCCAAGCGAGGTTGCGCCAAACTACTATTATACTTGCAGGTGCGATCTA	GTCCAAGCGAGGTTGCGCAAAACTACTATTATACTTGCAGGTGCGATCTA	GTCCAAGCGAGGTTGCGCAAAACTACTATTATACTAGCAGGTGCGATCTA	GTCCAAGCGAGATTGCGCAAAACTACTATTATACTAGCAGGTGCGATCTA	GTCCAAGCAAGATTGCGCAAAACTACTATTATACTAGCAGGTGCGATCTA	GTCCAAGCAAGATTGCACAAAACTACTATTATACTAGCAGGTGCGATCTA	GTCCAAGCAAGATTACACAAAACTACTATTATACTAGCAGGTGCGATCTA	GTCCAAGCAAGATTACACAAGACTACTATTATACTAGCAGGTGCGATCTA	GTCCAAGCAAGATTACACAAGACTACTATTATACTAGCAGGTGCGATATA	GTCCAAGCAAGATTACACAAGACTACTATTATACTAGCAGGTGCGATATG	GTCCAAGCAAGATTATACAAGACTACTATTATACTAGCAGGTGCGATATG	GTCCAAGCAAGATTATACAAGACTACTATTATACTAACAGGTGCGATATG	GTCCAAGCAAGATTATACAAGACTACTATTATACTAACAAGTGCGATATG	GTCCAAGCAAGATTATACAAGACTACTACTATACTAACAAGTGCGATATG	GTCCAAGCAAGATTATACAAGACTACTACTATACTAACAAGAGCGATATG	GTCCAAGCAAGATTATACAAGACTACTACTATACTAACAAGAGAGATATG	GTCCAAGCAAGATTATACAAGACTACTACTATACTAACAAGAGAGATAAG	GTCCAAGCAAGATTATACAAGACTACTACTATACTAACAAGACAGATAAG	GTCCAAGCAAGATTATACAAGACTACTACTATACAAACAAGACAGATAAG	GTCCAAGCAAGATTATACAAGACTACTACTATACAGACAAGACAGATAAG	GTCAAAGCAAGATTATACAAGACTACTACTATACAGACAAGACAGATAAG	GTCAAAGCAAGATTATACAAGACTACTACTATACAGACAAGACAGATAAG	GTCAAAGCAAGATTATACAAGACTACTACTATACAGACAAGACAGATAAG	GTCAAAGCAAGATTATACAAGACTACTACTATACAGACAAGACAGATAAG	GTCAAAGCAAGATTATACAAGACTACTACTATACAGACAAGACAGATAAG	GTCAAAGCAAGATTATACAAGACTACTACTATACAGACAAGACAGATAAG	GTCAAAGCAAGATTATACAAGACTACTACTATACAGACAAGACAGATAAG	GTCAAAGCAAGATTATACAAGACTACTACTATACAGACAAGACAGATAAG	GTCAAAGCAAGATTATACAAGACTACTACTATACAGACAAGACAGATAAG	GTCAAAGCAAGATTATACAAGACTACTACTATACAGACAAGACAGATAAG	GTCAAAGCAAGATTATACAAGACTACTACTATACAGACAAGACAGATAAG	GTCAAAGCAAGATTATACAAGACTACTACTATACAGACAAGACAGATAAG	GTCAAAGCAAGATTATACAAGACTACTACTATACAGACAAGACAGATAAG	GTCAAAGCAAGATTATACAAGACTACTACTATACAGACAAGACAGATAAG	GTCAAAGCAAGATTATACAAGACTACTACTATACAGACAAGACAGATAAG
114	CGAACGATAATTGTCGCCCCCTCCCCGTGGACGAGGCCAAAAAGCGAGGA	CGAACGATAATTGTCGCCCCCTCCCCGTGGACAAGGCCAAAAAGCGAGGA	CGAACGATAATTGTCGCCCCCTCCCCGTGGACAAGGCCAAAAAGCAAGGA	CGAACGATAATTGTCGCCCCCTCCCCGTGGACAAGGCCAAAAAGCAAGAA	CGAACGATAATTGTCGCCCCCTCCCCGTGGACAAGACCAAAAAGCAAGAA	CGAACGATAATTGTCGCCCCCTCCCCGTAGACAAGACCAAAAAGCAAGAA	AGAACGATAATTGTCGCCCCCTCCCCGTAGACAAGACCAAAAAGCAAGAA	AGAAAGATAATTGTCGCCCCCTCCCCGTAGACAAGACCAAAAAGCAAGAA	AGAAAGATAATTGTCGCCCCCTCCCCGTAGACAAGACAAAAAAGCAAGAA	AGAAAGATAATTGTCGCCCCCTCCCCGTAGACAAGACAAACAAGCAAGAA	AGAAAGATAATTGTCGCCCCCTCCCCGAAGACAAGACAAACAAGCAAGAA	AGAAAGATAATTGTAGCCCCCTCCCCGAAGACAAGACAAACAAGCAAGAA	AGAAAGACAATTGTAGCCCCCTCCCCGAAGACAAGACAAACAAGCAAGAA	AGAAATACAATTGTAGCCCCCTCCCCGAAGACAAGACAAACAAGCAAGAA	AGAAATACAACTGTAGCCCCCTCCCCGAAGACAAGACAAACAAGCAAGAA	AGAAATACAACTGTAGCCCCCGCCCCGAAGACAAGACAAACAAGCAAGAA	AGAAATACAACTGTAGCCCCAGCCCCGAAGACAAGACAAACAAGCAAGAA	AGAAATACAACTGTAGCCCCAGCCACGAAGACAAGACAAACAAGCAAGAA	AGAAATACAACTGTAGCCCCAGCTACGAAGACAAGACAAACAAGCAAGAA	AGAAATACAACTGTAGCCCCAGCTACAAAGACAAGACAAACAAGCAAGAA	AGAAATACAACTGTAGCTCCAGCTACAAAGACAAGACAAACAAGCAAGAA	AGAAATACAACTGTAGCTCAAGCTACAAAGACAAGACAAACAAGCAAGAA	AGAAATACAAGTGTAGCTCAAGCTACAAAGACAAGACAAACAAGCAAGAA	AGAAATACAAGAGTAGCTCAAGCTACAAAGACAAGACAAACAAGCAAGAA	AGAAATACAAGATTAGCTCAAGCTACAAAGACAAGACAAACAAGCAAGAA	AGAATTACAAGATTAGCTCAAGCTACAAAGACAAGACAAACAAGCAAGAA	AGAATTACAAGATTAGCTCAAGCTACAAAGACAAGACTAACAAGCAAGAA	AGAATTACAAGATTAGCTCAAGCTACAAAGACAAGACTAACAAGCAAGAT	AGAATTACAAGATTAGATCAAGCTACAAAGACAAGACTAACAAGCAAGAT	AGAATTACAAGATTAAATCAAGCTACAAAGACAAGACTAACAAGCAAGAT	AGAATTACAAGACTAAATCAAGCTACAAAGACAAGACTAACAAGCAAGAT	AGAATTACAAGACTAAATCAAGCTACAAAGACAAGACTAACAAGCAAGAT	AGAATTACAAGACTAAATCAAGCTACAAAGACAAGACTAACAAGCAAGAT	AGAATTACAAGACTAAATCAAGCTACAAAGACAAGACTAACAAGCAAGAT	AGAATTACAAGACTAAATCAAGCTACAAAGACAAGACTAACAAGCAAGAT	AGAATTACAAGACTAAATCAAGCTACAAAGACAAGACTAACAAGCAAGAT	AGAATTACAAGACTAAATCAAGCTACAAAGACAAGACTAACAAGCAAGAT	AGAATTACAAGACTAAATCAAGCTACAAAGACAAGACTAACAAGCAAGAT	AGAATTACAAGACTAAATCAAGCTACAAAGACAAGACTAACAAGCAAGAT	AGAATTACAAGACTAAATCAAGCTACAAAGACAAGACTAACAAGCAAGAT	AGAATTACAAGACTAAATCAAGCTACAAAGACAAGACTAACAAGCAAGAT
115	AGTTTCGGAGGACTTCTCACAGAGACAAACACGCTCTGTAACTGAAGCGA	AGTTTCGGAGGACTTCTCACAGAGACAAACACGCTCTGTAACTGAAGAGA	AGTTTCGGAGGACTTCTTACAGAGACAAACACGCTCTGTAACTGAAGAGA	AGTTTCGGAGGACTTCTTACAGAGACAAACACGCTCTATAACTGAAGAGA	AGTTTCGGAGGACTTCTTACAGAGACAAACACGCTATATAACTGAAGAGA	AGTTTCGGAGGACTTCTTACAGAGACAAACAAGCTATATAACTGAAGAGA	AGTTTCGGAGGACTTCTTACAGAGACAAACAAGCTATATAACTAAAGAGA	AGATTCGGAGGACTTCTTACAGAGACAAACAAGCTATATAACTAAAGAGA	AGATTCGAAGGACTTCTTACAGAGACAAACAAGCTATATAACTAAAGAGA	AGATTCGAAGGACTACTTACAGAGACAAACAAGCTATATAACTAAAGAGA	AGATTCGAAGTACTACTTACAGAGACAAACAAGCTATATAACTAAAGAGA	AGATTCAAAGTACTACTTACAGAGACAAACAAGCTATATAACTAAAGAGA	AGATTCAAAGTACTACTTACAAAGACAAACAAGCTATATAACTAAAGAGA	AGATACAAAGTACTACTTACAAAGACAAACAAGCTATATAACTAAAGAGA	AGATACAAAGTACTACTTACAAAGACAAACAAGCTATATAACTAAAGACA	AGATACAAAGTACTACATACAAAGACAAACAAGCTATATAACTAAAGACA	AGATACAAAGAACTACATACAAAGACAAACAAGCTATATAACTAAAGACA	AGATACAAAGAACTACATACAAAGACAAACAAGCTATATAAATAAAGACA	AGATACAAAGAACTACATACAAAGACAAACAAGATATATAAATAAAGACA	AGATACAAAGAACTACATACAAAGACAAACAAGATATATATATAAAGACA	AGATACAAAGAACTATATACAAAGACAAACAAGATATATATATAAAGACA	AGATACAAAGAACTATATACAAATACAAACAAGATATATATATAAAGACA	AGATACAAAGAACTATATAAAAATACAAACAAGATATATATATAAAGACA	AGATACAAAGAACTATATAAAATTACAAACAAGATATATATATAAAGACA	AGATACAAAAAACTATATAAAATTACAAACAAGATATATATATAAAGACA	AGATACAAGAAACTATATAAAATTACAAACAAGATATATATATAAAGACA	AGAAACAAGAAACTATATAAAATTACAAACAAGATATATATATAAAGACA	AGAAACAAGAAACTATATAAAATTACAAACAAGATATATATATAAAGACA	AGAAACAAGAAACTATATAAAATTACAAACAAGATATATATATAAAGACA	AGAAACAAGAAACTATATAAAATTACAAACAAGATATATATATAAAGACA	AGAAACAAGAAACTATATAAAATTACAAACAAGATATATATATAAAGACA	AGAAACAAGAAACTATATAAAATTACAAACAAGATATATATATAAAGACA	AGAAACAAGAAACTATATAAAATTACAAACAAGATATATATATAAAGACA	AGAAACAAGAAACTATATAAAATTACAAACAAGATATATATATAAAGACA	AGAAACAAGAAACTATATAAAATTACAAACAAGATATATATATAAAGACA	AGAAACAAGAAACTATATAAAATTACAAACAAGATATATATATAAAGACA	AGAAACAAGAAACTATATAAAATTACAAACAAGATATATATATAAAGACA	AGAAACAAGAAACTATATAAAATTACAAACAAGATATATATATAAAGACA	AGAAACAAGAAACTATATAAAATTACAAACAAGATATATATATAAAGACA	AGAAACAAGAAACTATATAAAATTACAAACAAGATATATATATAAAGACA	AGAAACAAGAAACTATATAAAATTACAAACAAGATATATATATAAAGACA
116	GTGTACATGTTACGCTGACCTAGTATCTATGCTACCACTAGTCTAACATC	GTGTACATGTTACGCTGACCTAGTATCTATTCTACCACTAGTCTAACATC	GTGTACAAGTTACGCTGACCTAGTATCTATTCTACCACTAGTCTAACATC	GTGTACAAGTTACGCTGACCTAGTATCTATTCTACTACTAGTCTAACATC	GTGTACAAGTTACGCTGACCAAGTATCTATTCTACTACTAGTCTAACATC	GTGTACAAGTTACGCTGACCAAGTATCTATTCTACTACTACTCTAACATC	GTATACAAGTTACGCTGACCAAGTATCTATTCTACTACTACTCTAACATC	GTATACAAGTTACGCTGATCAAGTATCTATTCTACTACTACTCTAACATC	GTATACAAGTTAAGCTGATCAAGTATCTATTCTACTACTACTCTAACATC	GTATACAAGTTAAGCTGATCAAGTATCTATTCTACTACTACTATAACATC	GTATACAAGTTAAGCTGATCAAGTATCTATTCTACTACTACTATAAAATC	GTATACAAGTTAAGCTGATCAAGTATATATTCTACTACTACTATAAAATC	GTATACAAGTTAAGCTGATCAAGTATATATACTACTACTACTATAAAATC	GTATACAAGTCAAGCTGATCAAGTATATATACTACTACTACTATAAAATC	GTATACAAGACAAGCTGATCAAGTATATATACTACTACTACTATAAAATC	TTATACAAGACAAGCTGATCAAGTATATATACTACTACTACTATAAAATC	TTATACAAGACAAGCCGATCAAGTATATATACTACTACTACTATAAAATC	TTATACAAGACAAGTCGATCAAGTATATATACTACTACTACTATAAAATC	TTATACAAGACAAGTCGATCAAGTATATATACTACTACTACTACAAAATC	TTATACAAGACAAGTCGATCAAGTATATATACTACTACTACTACAAAGTC	TTATACAAGACAAGTCGATCAAGTATATATACTACTACTACTACAAAGAC	TTATACAAGACAAGTCAATCAAGTATATATACTACTACTACTACAAAGAC	TTATACAAGACAAGTCAATCAAGAATATATACTACTACTACTACAAAGAC	TTATACAAGACAAGTCAATCAAGATTATATACTACTACTACTACAAAGAC	TTATACAAGACAAGTCAATCAAGATTATATACTACTACTACTACAAAGAT	TTATACAAGACAAGTCAATCAAGATTATATACTACTACTACTACAAAGAT	TTATACAAGACAAGTCAATCAAGATTATATACTACTACTACTACAAAGAT	TTATACAAGACAAGTCAATCAAGATTATATACTACTACTACTACAAAGAT	TTATACAAGACAAGTCAATCAAGATTATATACTACTACTACTACAAAGAT	TTATACAAGACAAGTCAATCAAGATTATATACTACTACTACTACAAAGAT	TTATACAAGACAAGTCAATCAAGATTATATACTACTACTACTACAAAGAT	TTATACAAGACAAGTCAATCAAGATTATATACTACTACTACTACAAAGAT	TTATACAAGACAAGTCAATCAAGATTATATACTACTACTACTACAAAGAT	TTATACAAGACAAGTCAATCAAGATTATATACTACTACTACTACAAAGAT	TTATACAAGACAAGTCAATCAAGATTATATACTACTACTACTACAAAGAT	TTATACAAGACAAGTCAATCAAGATTATATACTACTACTACTACAAAGAT	TTATACAAGACAAGTCAATCAAGATTATATACTACTACTACTACAAAGAT	TTATACAAGACAAGTCAATCAAGATTATATACTACTACTACTACAAAGAT	TTATACAAGACAAGTCAATCAAGATTATATACTACTACTACTACAAAGAT	TTATACAAGACAAGTCAATCAAGATTATATACTACTACTACTACAAAGAT	TTATACAAGACAAGTCAATCAAGATTATATACTACTACTACTACAAAGAT
117	ATCGTGACGTATTTACGCCAGACCCTGTAGACATAGACGGAACGCACAGT	ATCGTGACGTATTTACGCCAGACCCTGTAGACATAGACGGAATGCACAGT	ATCGTGACGTATTTACGCAAGACCCTGTAGACATAGACGGAATGCACAGT	ATCGTTACGTATTTACGCAAGACCCTGTAGACATAGACGGAATGCACAGT	ATCGTTACGTATTTACACAAGACCCTGTAGACATAGACGGAATGCACAGT	ATCGTTACGTATTTACACAAGACCCTGTAGACATAGACGAAATGCACAGT	ATCGTTACGTATTTACACAAGACACTGTAGACATAGACGAAATGCACAGT	ATCGTTACGTATTTACACAAGACACTATAGACATAGACGAAATGCACAGT	ATCGTTACGTATTTACACAAGACACTATATACATAGACGAAATGCACAGT	ATCGTTACGTATTTACACAAGACACTATATACATAGACAAAATGCACAGT	AGCGTTACGTATTTACACAAGACACTATATACATAGACAAAATGCACAGT	AGAGTTACGTATTTACACAAGACACTATATACATAGACAAAATGCACAGT	AGAGTTACATATTTACACAAGACACTATATACATAGACAAAATGCACAGT	AGAATTACATATTTACACAAGACACTATATACATAGACAAAATGCACAGT	AGAATTACATATTTACACAAGACACTATATACAAAGACAAAATGCACAGT	AGAATTACATATTTACACAAGACACTATATACAAAGACAAAATGAACAGT	AGAATTACATATTTACACAAGACACTATATACAAAGACAAGATGAACAGT	AGAATTACATATTTACACAAGACACTATATACAAAGACAAGATGAAGAGT	AGAATTACATATTTACACAAGACATTATATACAAAGACAAGATGAAGAGT	AGAATTACATATTTACACAAGACATTATATACAAAGACAAGATGAAGACT	AGAATTACATATTTACACAAGACATTACATACAAAGACAAGATGAAGACT	AGAATTACATATTTATACAAGACATTACATACAAAGACAAGATGAAGACT	AGAATTACATATTTATACAAGAAATTACATACAAAGACAAGATGAAGACT	AGAATTACATATTTATACAAGAAATTACATACAAAGACAAGATGAAGACT	AGAATTACATATTTATACAAGAAATTACATACAAAGACAAGATGAAGACT	AGAATTACATATTTATACAAGAAATTACATACAAAGACAAGATGAAGACT	AGAATTACATATTTATACAAGAAATTACATACAAAGACAAGATGAAGACT	AGAATTACATATTTATACAAGAAATTACATACAAAGACAAGATGAAGACT	AGAATTACATATTTATACAAGAAATTACATACAAAGACAAGATGAAGACT	AGAATTACATATTTATACAAGAAATTACATACAAAGACAAGATGAAGACT	AGAATTACATATTTATACAAGAAATTACATACAAAGACAAGATGAAGACT	AGAATTACATATTTATACAAGAAATTACATACAAAGACAAGATGAAGACT	AGAATTACATATTTATACAAGAAATTACATACAAAGACAAGATGAAGACT	AGAATTACATATTTATACAAGAAATTACATACAAAGACAAGATGAAGACT	AGAATTACATATTTATACAAGAAATTACATACAAAGACAAGATGAAGACT	AGAATTACATATTTATACAAGAAATTACATACAAAGACAAGATGAAGACT	AGAATTACATATTTATACAAGAAATTACATACAAAGACAAGATGAAGACT	AGAATTACATATTTATACAAGAAATTACATACAAAGACAAGATGAAGACT	AGAATTACATATTTATACAAGAAATTACATACAAAGACAAGATGAAGACT	AGAATTACATATTTATACAAGAAATTACATACAAAGACAAGATGAAGACT	AGAATTACATATTTATACAAGAAATTACATACAAAGACAAGATGAAGACT
118	ATATTCGACCTTGAATTTGCGCGGATTGCACGTTTAAGGTGAACACAATT	AGATTCGACCTTGAATTTGCGCGGATTGCACGTTTAAGGTGAACACAATT	AGATTCGACCTTGAATTTGCGCGGATTGCACGTTTAAGATGAACACAATT	AGATTCGACCTTGAATTTGAGCGGATTGCACGTTTAAGATGAACACAATT	AGATTCTACCTTGAATTTGAGCGGATTGCACGTTTAAGATGAACACAATT	AGATTCTACATTGAATTTGAGCGGATTGCACGTTTAAGATGAACACAATT	AGATTCTACATAGAATTTGAGCGGATTGCACGTTTAAGATGAACACAATT	AGATTCTACATAGAATTTGAGCAGATTGCACGTTTAAGATGAACACAATT	AGATTCTACATAGAATTTGAGCAGATTACACGTTTAAGATGAACACAATT	AGATTCTACATAGAATTTGAGCAGATTACACATTTAAGATGAACACAATT	AGATTCTACATAGAATTTAAGCAGATTACACATTTAAGATGAACACAATT	AGATTCTACATAGAATTTAAGCAAATTACACATTTAAGATGAACACAATT	AGATTCTACATAGAATTTAAGCAAATTACAAATTTAAGATGAACACAATT	AGATTCTACATAGAATTTAAGCAAACTACAAATTTAAGATGAACACAATT	AGATTCTACAAAGAATTTAAGCAAACTACAAATTTAAGATGAACACAATT	AGATTATACAAAGAATTTAAGCAAACTACAAATTTAAGATGAACACAATT	AGATTATACAAAGAATTTAAGCAAACTACAAATTTAAGATGAAGACAATT	AGATTATACAAAGAATTTAAGCAAACTACAAATTTAAGATCAAGACAATT	AGATTATACAAAGAATATAAGCAAACTACAAATTTAAGATCAAGACAATT	AGATTATACAAAGAATACAAGCAAACTACAAATTTAAGATCAAGACAATT	AGATTATACAAAGAATACAAGAAAACTACAAATTTAAGATCAAGACAATT	AGATTATACAAATAATACAAGAAAACTACAAATTTAAGATCAAGACAATT	AGATTATACAAATTATACAAGAAAACTACAAATTTAAGATCAAGACAATT	AGATTATACAAATTATACAAGAAAACTACAAATTTAAGATCAAGACTATT	AGATTATACAAATTATACAAGAAAACTACAAATTTAAGATCAAGACTACT	AGATTATACAAATTATACAAGAAAACTACAAAGTTAAGATCAAGACTACT	AGATTATACAAATTATACAAGAAAACTACAAAGATAAGATCAAGACTACT	AGATTATACAAATTATACAAGAAAACTACAAAGATAAGAACAAGACTACT	AGATTATACAAATTATACAAGAAAACTACAAAGACAAGAACAAGACTACT	AGATTATACAAATTATACAAGAAAAGTACAAAGACAAGAACAAGACTACT	AGATTATACAAATTATACAAGAAAAGTACAAAGACAAGAACAAGACTACT	AGATTATACAAATTATACAAGAAAAGTACAAAGACAAGAACAAGACTACT	AGATTATACAAATTATACAAGAAAAGTACAAAGACAAGAACAAGACTACT	AGATTATACAAATTATACAAGAAAAGTACAAAGACAAGAACAAGACTACT	AGATTATACAAATTATACAAGAAAAGTACAAAGACAAGAACAAGACTACT	AGATTATACAAATTATACAAGAAAAGTACAAAGACAAGAACAAGACTACT	AGATTATACAAATTATACAAGAAAAGTACAAAGACAAGAACAAGACTACT	AGATTATACAAATTATACAAGAAAAGTACAAAGACAAGAACAAGACTACT	AGATTATACAAATTATACAAGAAAAGTACAAAGACAAGAACAAGACTACT	AGATTATACAAATTATACAAGAAAAGTACAAAGACAAGAACAAGACTACT	AGATTATACAAATTATACAAGAAAAGTACAAAGACAAGAACAAGACTACT
119	GACGTAAAGACGAGCCTCGAGCTGCGGAGTACTTCCGATCTTAAGAGGTA	GACGTAAAGACGAGCCTCGAGCTACGGAGTACTTCCGATCTTAAGAGGTA	GACGTAAAGACGAGCCTCGAGCTACGGAGTACTTACGATCTTAAGAGGTA	GACGTAAAGACGAGCCTCGAGCTACAGAGTACTTACGATCTTAAGAGGTA	GACGTAAAGACGAGCCTCGAGCTACAGAGTACTTACGAACTTAAGAGGTA	GACGTAAAGACGAGCCTCAAGCTACAGAGTACTTACGAACTTAAGAGGTA	GACGTAAAGACAAGCCTCAAGCTACAGAGTACTTACGAACTTAAGAGGTA	GACGTCAAGACAAGCCTCAAGCTACAGAGTACTTACGAACTTAAGAGGTA	GACGTCAAGACAAGCATCAAGCTACAGAGTACTTACGAACTTAAGAGGTA	GACGTCAAGACAAGCATCAAGCTACAAAGTACTTACGAACTTAAGAGGTA	GACGTCAAGACAAGAATCAAGCTACAAAGTACTTACGAACTTAAGAGGTA	GACGTCAAGACAAGAATCAAGCTACAAAGTACTTACAAACTTAAGAGGTA	GACGTCAAGACAAGAATCAAGCTACAAAGTACTTACAAAGTTAAGAGGTA	GACGTCAAGACAAGAATCAAGCTACAAAGTACTTACAAAGTTAAGAAGTA	GACGTCAAGACAAGAATCAAGCTACAAAGTACTTACAAAGTTAAGAAGAA	GACGTCAAGACAAGAATCAAGATACAAAGTACTTACAAAGTTAAGAAGAA	GACGTCAAGACAAGAATCAAGATACAAAGTACTTACAAAGTCAAGAAGAA	GACGTCAAGACAAGAATCAAGATACAAATTACTTACAAAGTCAAGAAGAA	GACGTCAAGACAAGAATCAAGATACAAATTACTTACAAAGACAAGAAGAA	GACGTCAAGACAAGAATCAAGATACAAATTACTTACAAAGACAAGAAGAT	GACCTCAAGACAAGAATCAAGATACAAATTACTTACAAAGACAAGAAGAT	GTCCTCAAGACAAGAATCAAGATACAAATTACTTACAAAGACAAGAAGAT	GTACTCAAGACAAGAATCAAGATACAAATTACTTACAAAGACAAGAAGAT	GTACACAAGACAAGAATCAAGATACAAATTACTTACAAAGACAAGAAGAT	TTACACAAGACAAGAATCAAGATACAAATTACTTACAAAGACAAGAAGAT	TTACACAAGACAAGAATCAAGATACAAATTATTTACAAAGACAAGAAGAT	TTACACAAGACAAGAATCAAGATATAAATTATTTACAAAGACAAGAAGAT	TTACACAAGACAAGAAACAAGATATAAATTATTTACAAAGACAAGAAGAT	TTACACAAGACAAGAAACAAGATATATATTATTTACAAAGACAAGAAGAT	TTACACAAGACAAGAAACAAGATATATACTATTTACAAAGACAAGAAGAT	TTACACAAGACAAGAAACAAGATATATACTAATTACAAAGACAAGAAGAT	TTACACAAGACAAGAAACAAGATATATACAAATTACAAAGACAAGAAGAT	TTACACAAGACAAGAAACAAGATATATACAAACTACAAAGACAAGAAGAT	TTACACAAGACAAGAAACAAGATATATACAAACTACAAAGACAAGAAGAT	TTACACAAGACAAGAAACAAGATATATACAAACTACAAAGACAAGAAGAT	TTACACAAGACAAGAAACAAGATATATACAAACTACAAAGACAAGAAGAT	TTACACAAGACAAGAAACAAGATATATACAAACTACAAAGACAAGAAGAT	TTACACAAGACAAGAAACAAGATATATACAAACTACAAAGACAAGAAGAT	TTACACAAGACAAGAAACAAGATATATACAAACTACAAAGACAAGAAGAT	TTACACAAGACAAGAAACAAGATATATACAAACTACAAAGACAAGAAGAT	TTACACAAGACAAGAAACAAGATATATACAAACTACAAAGACAAGAAGAT
120	TCGCACCAAGCAACGCTGTAGAAGGACGTTAGTGTTATAGTACCCCATGT	TCGCACCAAGCAACGCTGTAGAAGGACGTTAGTGTTATAGTACCCCAAGT	TCGCACCAAGCAACGCTATAGAAGGACGTTAGTGTTATAGTACCCCAAGT	TCGCACCAAGCAACGCTATAGAAAGACGTTAGTGTTATAGTACCCCAAGT	TCGCACCAAGCAACGCTATAGAAAGACATTAGTGTTATAGTACCCCAAGT	TCGCACCAAGCAACGCTATAGAAAGACATTACTGTTATAGTACCCCAAGT	TCGCACCAAGAAACGCTATAGAAAGACATTACTGTTATAGTACCCCAAGT	TCGCACCAAGAAACGCTATAGAAAGACATTACTATTATAGTACCCCAAGT	TCGCACCAAGAAACGCTATAGAAAGACATTACTACTATAGTACCCCAAGT	TCGCACCAAGAAACGCTATACAAAGACATTACTACTATAGTACCCCAAGT	TCGCACCAAGAAAAGCTATACAAAGACATTACTACTATAGTACCCCAAGT	TCCCACCAAGAAAAGCTATACAAAGACATTACTACTATAGTACCCCAAGT	TCCCACCAAGAAAAGCTATACAAAGATATTACTACTATAGTACCCCAAGT	TCCCACCAAGAAAAGCTATACAAAGATATTACTACTATAGTACTCCAAGT	TCCCACCAAGAAAAGCTATACAAAGATATTACTACTATAGTACTACAAGT	TCCCATCAAGAAAAGCTATACAAAGATATTACTACTATAGTACTACAAGT	TCCCATCAAGACAAGCTATACAAAGATATTACTACTATAGTACTACAAGT	TCCCATCAAGACAAGCTATACAAATATATTACTACTATAGTACTACAAGT	TCCCATCAAGACAAGCTATACAAATATACTACTACTATAGTACTACAAGT	TCCCATCAAGACAAGCTATACAAATTTACTACTACTATAGTACTACAAGT	TCCCATCAAGACAAGCTATACAAATTTACTACTACTATAGTACTACAAGA	TCCAATCAAGACAAGCTATACAAATTTACTACTACTATAGTACTACAAGA	TCCAAGCAAGACAAGCTATACAAATTTACTACTACTATAGTACTACAAGA	TCCAAGCAAGACAAACTATACAAATTTACTACTACTATAGTACTACAAGA	TCCAAGCAAGACAAACTATACAAATTTACTACTACTATAGAACTACAAGA	TCCAAGCAAGACAAACTATACAAATTTACTACTACTATATAACTACAAGA	TCCAAGCAAGACAAACTATATAAATTTACTACTACTATATAACTACAAGA	TCCAAGCAAGACAAACTATATAAATTTACTACAACTATATAACTACAAGA	TCCAAGCAAGACAAACTATATAAATTTACTACAATTATATAACTACAAGA	TCCAAGCAAGACAAACTATATAAATTTACTACAATTACATAACTACAAGA	TCCAAGCAAGACAAACTATATAAATTTACTACAATTACAAAACTACAAGA	TCCAAGCAAGACAAACTATATAAATTTACTACAATTACAAAACTACAAGA	TCCAAGCAAGACAAACTATATAAATTTACTACAATTACAAAACTACAAGA	TCCAAGCAAGACAAACTATATAAATTTACTACAATTACAAAACTACAAGA	TCCAAGCAAGACAAACTATATAAATTTACTACAATTACAAAACTACAAGA	TCCAAGCAAGACAAACTATATAAATTTACTACAATTACAAAACTACAAGA	TCCAAGCAAGACAAACTATATAAATTTACTACAATTACAAAACTACAAGA	TCCAAGCAAGACAAACTATATAAATTTACTACAATTACAAAACTACAAGA	TCCAAGCAAGACAAACTATATAAATTTACTACAATTACAAAACTACAAGA	TCCAAGCAAGACAAACTATATAAATTTACTACAATTACAAAACTACAAGA	TCCAAGCAAGACAAACTATATAAATTTACTACAATTACAAAACTACAAGA
121	AATTATTGTCCCTATTGGACGTAACCCTTTGAAGATTCGCAGCCTGGACA	AATTATTGTCCCTATTGGACGTAACCCTTTCAAGATTCGCAGCCTGGACA	AATTATTGTCCCTATTGGACGTAACCCTTTCAAGATTCACAGCCTGGACA	AGTTATTGTCCCTATTGGACGTAACCCTTTCAAGATTCACAGCCTGGACA	AGATATTGTCCCTATTGGACGTAACCCTTTCAAGATTCACAGCCTGGACA	AGATATTGTCCCTATTGAACGTAACCCTTTCAAGATTCACAGCCTGGACA	AGATATTGTCCCTATTGAACGTAACCCTTTCAAGATACACAGCCTGGACA	AGATATTGTCCCTATTGAACGTAACCCTATCAAGATACACAGCCTGGACA	AGATATTGTCCCTATTGAACGTAACGCTATCAAGATACACAGCCTGGACA	AGAAATTGTCCCTATTGAACGTAACGCTATCAAGATACACAGCCTGGACA	AGAAATTGTCCCTATTGAACGTAAAGCTATCAAGATACACAGCCTGGACA	AGAAATTGTCCCTATTGAACGTAAAGCTATCAAGATACACAGACTGGACA	AGAAATTGTCCCTATTGAACGTAAAGCTATCAAGATACACAGACAGGACA	AGAAATTGTCCCTATTGAACGTAAAGCTATCAAGATACACAGACAAGACA	AGAAATTGTCCCTATTGAACGTAAAGCTATCAAGATACAAAGACAAGACA	AGAAATAGTCCCTATTGAACGTAAAGCTATCAAGATACAAAGACAAGACA	AGAAATAGTCCCTATTAAACGTAAAGCTATCAAGATACAAAGACAAGACA	AGAAATAGTCCCTATTAAACATAAAGCTATCAAGATACAAAGACAAGACA	AGAAATAGTCCCTATTAAATATAAAGCTATCAAGATACAAAGACAAGACA	AGAAATAGTCCCTATTAATTATAAAGCTATCAAGATACAAAGACAAGACA	AGAAATAGTCCCTATTAATTATAAAGCTATCAAGATACAAAGACAAGACT	AGAAATAGTCCCTATTAATTATAAAGCTATCAAGATACAAAGACAAGATT	AGAAATAGTCCCTATTAATTATAAAGCTATCAAGATACAAAGACAAGATG	AGAAATAGTCCCTATTAATTATAAAGATATCAAGATACAAAGACAAGATG	AGAAATAGTCCCTATTAATTACAAAGATATCAAGATACAAAGACAAGATG	AGAAATAGTCCCTAATAATTACAAAGATATCAAGATACAAAGACAAGATG	AGAAATAGTCACTAATAATTACAAAGATATCAAGATACAAAGACAAGATG	AGAAATAGTCACTAATAATTACAAAGAAATCAAGATACAAAGACAAGATG	AGAAATAGTCACTAATAATTACAAAGAAAGCAAGATACAAAGACAAGATG	AGAAATAGTCACTAATAATTACAAAGAAAGCAAGATACAAAGACAAGATG	AGAAATAGTCACTAATAATTACAAAGAAAGCAAGATACAAAGACAAGATG	AGAAATAGTCACTAATAATTACAAAGAAAGCAAGATACAAAGACAAGATG	AGAAATAGTCACTAATAATTACAAAGAAAGCAAGATACAAAGACAAGATG	AGAAATAGTCACTAATAATTACAAAGAAAGCAAGATACAAAGACAAGATG	AGAAATAGTCACTAATAATTACAAAGAAAGCAAGATACAAAGACAAGATG	AGAAATAGTCACTAATAATTACAAAGAAAGCAAGATACAAAGACAAGATG	AGAAATAGTCACTAATAATTACAAAGAAAGCAAGATACAAAGACAAGATG	AGAAATAGTCACTAATAATTACAAAGAAAGCAAGATACAAAGACAAGATG	AGAAATAGTCACTAATAATTACAAAGAAAGCAAGATACAAAGACAAGATG	AGAAATAGTCACTAATAATTACAAAGAAAGCAAGATACAAAGACAAGATG	AGAAATAGTCACTAATAATTACAAAGAAAGCAAGATACAAAGACAAGATG
122	ACATAGCTCACAATTACGTAAAGAGTCAACACTGTTTTCGAATAATCAGG	ACATAGCTCACAATTACGTAAAGAGTCAAGACTGTTTTCGAATAATCAGG	AGATAGCTCACAATTACGTAAAGAGTCAAGACTGTTTTCGAATAATCAGG	AGATAGCTCACAATTACGTAAAGAGTCAAGACTGTTTTCGAATAATCAAG	AGATAGCTCACAATTACGTAAAGAGTCAAGACTATTTTCGAATAATCAAG	AGATAGCTCACAATTACGTAAAGAGTCAAGACTATTTACGAATAATCAAG	AGATAGCTCACAATTACGAAAAGAGTCAAGACTATTTACGAATAATCAAG	AGATAGCTCAAAATTACGAAAAGAGTCAAGACTATTTACGAATAATCAAG	AGAAAGCTCAAAATTACGAAAAGAGTCAAGACTATTTACGAATAATCAAG	AGAAAGATCAAAATTACGAAAAGAGTCAAGACTATTTACGAATAATCAAG	AGAAAGATCAAAATTACGAAAAGAGTCAAGACTATTTACAAATAATCAAG	AGAAAGATCAAAATTACGAAAAGAGTCAAGACTATTTACAAAGAATCAAG	AGAAAGATCAAGATTACGAAAAGAGTCAAGACTATTTACAAAGAATCAAG	AGAAAGATCAAGATTACGAAAAGAGTCAAGATTATTTACAAAGAATCAAG	AGAAAGATCAAGATTACGAAAAGAGTCAAGATTATATACAAAGAATCAAG	AGAAAGATCAAGATTACGAAAAGAGTCAAGATTATATACTAAGAATCAAG	AGAAAGATCAAGATTACGACAAGAGTCAAGATTATATACTAAGAATCAAG	AGAAAGATCAAGATTACTACAAGAGTCAAGATTATATACTAAGAATCAAG	AGAAAGATCAAGATTACTACAAGAGTCAAGATTATATACTAAGAAACAAG	AGAAAGAGCAAGATTACTACAAGAGTCAAGATTATATACTAAGAAACAAG	AGAAAGAGCAAGATTACTACAAGAGTCAAGATTATATACTAAGATACAAG	AGAAAGAGCAAGATTACTACAAGACTCAAGATTATATACTAAGATACAAG	AGAAAGAGCAAGATTACTACAAGACTCAAGATTATATACTAAGATACAAG	AGAAAGAGCAAGATTACTACAAGACTCAAGATTATATACTAAGATACAAG	AGAAAGAGCAAGATTACTACAAGACTCAAGATTATATACTAAGATACAAG	AGAAAGAGCAAGATTACTACAAGACTCAAGATTATATACTAAGATACAAG	AGAAAGAGCAAGATTACTACAAGACTCAAGATTATATACTAAGATACAAG	AGAAAGAGCAAGATTACTACAAGACTCAAGATTATATACTAAGATACAAG	AGAAAGAGCAAGATTACTACAAGACTCAAGATTATATACTAAGATACAAG	AGAAAGAGCAAGATTACTACAAGACTCAAGATTATATACTAAGATACAAG	AGAAAGAGCAAGATTACTACAAGACTCAAGATTATATACTAAGATACAAG	AGAAAGAGCAAGATTACTACAAGACTCAAGATTATATACTAAGATACAAG	AGAAAGAGCAAGATTACTACAAGACTCAAGATTATATACTAAGATACAAG	AGAAAGAGCAAGATTACTACAAGACTCAAGATTATATACTAAGATACAAG	AGAAAGAGCAAGATTACTACAAGACTCAAGATTATATACTAAGATACAAG	AGAAAGAGCAAGATTACTACAAGACTCAAGATTATATACTAAGATACAAG	AGAAAGAGCAAGATTACTACAAGACTCAAGATTATATACTAAGATACAAG	AGAAAGAGCAAGATTACTACAAGACTCAAGATTATATACTAAGATACAAG	AGAAAGAGCAAGATTACTACAAGACTCAAGATTATATACTAAGATACAAG	AGAAAGAGCAAGATTACTACAAGACTCAAGATTATATACTAAGATACAAG	AGAAAGAGCAAGATTACTACAAGACTCAAGATTATATACTAAGATACAAG
123	CGTAGAACTGAATGAGGATAACCTGTTCACGTCCGCCCTTACGCACCACG	CGTAGAACTGAATGAGGATAACCTGTTCACGTCCGCCCTTACGCACCATG	CGTACAACTGAATGAGGATAACCTGTTCACGTCCGCCCTTACGCACCATG	CGTACAACAGAATGAGGATAACCTGTTCACGTCCGCCCTTACGCACCATG	CGTACAACAGAATGAGGATAACCTGTTCAAGTCCGCCCTTACGCACCATG	CGTACAACAGAATGAGGATAACCTGTTCAAGTCCGCACTTACGCACCATG	CGTACAACAGAATGAGGATAACCTATTCAAGTCCGCACTTACGCACCATG	CGTACAACAGAATGAGGATAAACTATTCAAGTCCGCACTTACGCACCATG	CGTACAACAGAATGAGTATAAACTATTCAAGTCCGCACTTACGCACCATG	CGTACTACAGAATGAGTATAAACTATTCAAGTCCGCACTTACGCACCATG	CGTACTACAGAATGAGTATAAACTATTCAAGTCCGTACTTACGCACCATG	AGTACTACAGAATGAGTATAAACTATTCAAGTCCGTACTTACGCACCATG	AGAACTACAGAATGAGTATAAACTATTCAAGTCCGTACTTACGCACCATG	AGAACTACAGAATGAGTATAAACTATACAAGTCCGTACTTACGCACCATG	AGAACTACAAAATGAGTATAAACTATACAAGTCCGTACTTACGCACCATG	AGAACTACAAGATGAGTATAAACTATACAAGTCCGTACTTACGCACCATG	AGAACTACAAGATGAGTATAAACTATACAAGTACGTACTTACGCACCATG	AGAACTACAAGATGAGTATAAACTATACAAGTACATACTTACGCACCATG	AGAATTACAAGATGAGTATAAACTATACAAGTACATACTTACGCACCATG	AGAATTACAAGATGAGTATAAACTATACAAGTATATACTTACGCACCATG	AGAATTACAAGATGAGTATAAACTATACAAGTATATACTTAAGCACCATG	AGAATTACAAGATGAGTATAAACTATACAAGTATATACTTAAGCAACATG	AGAATTACAAGATGAGTATAAACTATACAAGTATATACTTAAGCAAGATG	AGAATTACAAGATGAGTATAAACTATACAAGTATATACTTAATCAAGATG	AGAATTACAAGATGAGTATAAACTATACAAGTATATACATAATCAAGATG	AGAATTACAAGATGAGTATAAACTATACAAGTATATACAAAATCAAGATG	AGAATTACAAGATGAGTATAAACTATACAAGTATATACAAAGTCAAGATG	AGAATTACAAGATGAGTATAAACTATACAAGTATATACAAAGACAAGATG	AGAATTACAAGATGAGTATAAACTATACAAGTATTTACAAAGACAAGATG	AGAATTACAAGATTAGTATAAACTATACAAGTATTTACAAAGACAAGATG	AGAATTACAAGATTACTATAAACTATACAAGTATTTACAAAGACAAGATG	AGAATTACAAGACTACTATAAACTATACAAGTATTTACAAAGACAAGATG	AGAATTACAAAACTACTATAAACTATACAAGTATTTACAAAGACAAGATG	AGAATTACAAAGCTACTATAAACTATACAAGTATTTACAAAGACAAGATG	AGAATTACAAAGCTACTATAAACTATACAAGAATTTACAAAGACAAGATG	AGAATTACAAAGCTACTATAAACTATACAAGAATTTACAAAGACAAGATG	AGAATTACAAAGCTACTATAAACTATACAAGAATTTACAAAGACAAGATG	AGAATTACAAAGCTACTATAAACTATACAAGAATTTACAAAGACAAGATG	AGAATTACAAAGCTACTATAAACTATACAAGAATTTACAAAGACAAGATG	AGAATTACAAAGCTACTATAAACTATACAAGAATTTACAAAGACAAGATG	AGAATTACAAAGCTACTATAAACTATACAAGAATTTACAAAGACAAGATG
124	CCTACGACAGGCCATACTCGTATAAGCGAATCCGAATGACCAAAGATGTC	CCTACGACAGGCCATACTCGTATAAGCGAATCCGAATGACCAAAGAAGTC	CCTACGACAGGCCATACTCGTACAAGCGAATCCGAATGACCAAAGAAGTC	CCTACGACAGGCCATACTCGTACAAGCGAATCAGAATGACCAAAGAAGTC	CCTACGACAGGCCATACTCATACAAGCGAATCAGAATGACCAAAGAAGTC	CCTACGACAGGCCATACTCATACAAGCGAATCAGAATGACAAAAGAAGTC	CCTACGACAAGCCATACTCATACAAGCGAATCAGAATGACAAAAGAAGTC	CCTACGACAAGACATACTCATACAAGCGAATCAGAATGACAAAAGAAGTC	CCTACGACAAGACATACTTATACAAGCGAATCAGAATGACAAAAGAAGTC	CCTACGACAAGACATACTTATACAAGAGAATCAGAATGACAAAAGAAGTC	CCTACGACAAGACATACTTATACAAGAAAATCAGAATGACAAAAGAAGTC	ACTACGACAAGACATACTTATACAAGAAAATCAGAATGACAAAAGAAGTC	ACTAAGACAAGACATACTTATACAAGAAAATCAGAATGACAAAAGAAGTC	ACTAAGACAAGACATACTTATACAAGAAAATCAGAATGACAAAACAAGTC	ACTAAGACAAGACATACTTATACAAGAAAATCAGAATGACAAGACAAGTC	ACTAAGACAAGACATACTTATACAAGAAAATCAGAATTACAAGACAAGTC	ACTAAGACAAGACATACTTATACAAGAAAATAAGAATTACAAGACAAGTC	ACTAAGACAAGACATACTTATACAAGAAAATAAGAATTACAAGACAAGAC	AGTAAGACAAGACATACTTATACAAGAAAATAAGAATTACAAGACAAGAC	AGAAAGACAAGACATACTTATACAAGAAAATAAGAATTACAAGACAAGAC	AGAAAGACAAGACATACTTATACAAGAAAACAAGAATTACAAGACAAGAC	AGAAAGACAAGACATACTTATACAAGAAGACAAGAATTACAAGACAAGAC	AGAAAGACAAGACATACTTATACAACAAGACAAGAATTACAAGACAAGAC	AGAAAGACAAGACATACTTATACTACAAGACAAGAATTACAAGACAAGAC	AGAAAGACAAGACATACTTCTACTACAAGACAAGAATTACAAGACAAGAC	AGAAAGACAAGACATACATCTACTACAAGACAAGAATTACAAGACAAGAC	AGAAAGACAAGACATACATCTACTACAAGACAAGAATTACAAGACAAGAA	AGAAAGTCAAGACATACATCTACTACAAGACAAGAATTACAAGACAAGAA	AGAAAGTCAAGACATACATCTACTACAAGACAAGAATTACAAGACAAGAA	AGAAAGTCAAGACATACATCTACTACAAGACAAGAATTACAAGACAAGAA	AGAAAGTCAAGACATACATCTACTACAAGACAAGAATTACAAGACAAGAA	AGAAAGTCAAGACATACATCTACTACAAGACAAGAATTACAAGACAAGAA	AGAAAGTCAAGACATACATCTACTACAAGACAAGAATTACAAGACAAGAA	AGAAAGTCAAGACATACATCTACTACAAGACAAGAATTACAAGACAAGAA	AGAAAGTCAAGACATACATCTACTACAAGACAAGAATTACAAGACAAGAA	AGAAAGTCAAGACATACATCTACTACAAGACAAGAATTACAAGACAAGAA	AGAAAGTCAAGACATACATCTACTACAAGACAAGAATTACAAGACAAGAA	AGAAAGTCAAGACATACATCTACTACAAGACAAGAATTACAAGACAAGAA	AGAAAGTCAAGACATACATCTACTACAAGACAAGAATTACAAGACAAGAA	AGAAAGTCAAGACATACATCTACTACAAGACAAGAATTACAAGACAAGAA	AGAAAGTCAAGACATACATCTACTACAAGACAAGAATTACAAGACAAGAA
125	ACCACGTAATGGCAAGGGGAACATGCAGTGTGGTACGTATCATGCGTCCA	ACCACGTAATGGCAAGGGGAACAAGCAGTGTGGTACGTATCATGCGTCCA	ACCACGTAATGGCAAGAGGAACAAGCAGTGTGGTACGTATCATGCGTCCA	ACCACGTAAAGGCAAGAGGAACAAGCAGTGTGGTACGTATCATGCGTCCA	ACCACGTAAAGGCAAGAGGAACAAGCAGTGTGGTACGTATCATGAGTCCA	AGCACGTAAAGGCAAGAGGAACAAGCAGTGTGGTACGTATCATGAGTCCA	AGCACGTAAAGGCAAGAAGAACAAGCAGTGTGGTACGTATCATGAGTCCA	AGCACGTAAAGGCAAGAAGAACAAGCAGTGTGATACGTATCATGAGTCCA	AGCACGTAAAGGCAAGAAGAACAAGAAGTGTGATACGTATCATGAGTCCA	AGCAAGTAAAGGCAAGAAGAACAAGAAGTGTGATACGTATCATGAGTCCA	AGCAAGTAAAGGCAAGAAGAACAAGAAGTGTGATACGAATCATGAGTCCA	AGCAAGTCAAGGCAAGAAGAACAAGAAGTGTGATACGAATCATGAGTCCA	AGAAAGTCAAGGCAAGAAGAACAAGAAGTGTGATACGAATCATGAGTCCA	AGAAAGTCAAGACAAGAAGAACAAGAAGTGTGATACGAATCATGAGTCCA	AGAAAGTCAAGACAAGAAAAACAAGAAGTGTGATACGAATCATGAGTCCA	AGAAAGTCAAGACAAGAAAAACAAGAAGAGTGATACGAATCATGAGTCCA	AGAAAGTCAAGACAAGAAAAACAAGAAGAGTGATACGAATCATGAGTGCA	AGAAAGTCAAGACAAGAAAAACAAGAAGAGTGATAAGAATCATGAGTGCA	AGAAAGTCAAGACAAGAAAAACAAGAAAAGTGATAAGAATCATGAGTGCA	AGAAAGTCAAGACAAGAAAAACAAGACAAGTGATAAGAATCATGAGTGCA	AGAAAGTCAAGACAAGAAAAACAAGACAAGAGATAAGAATCATGAGTGCA	AGAAAGTCAAGACAAGAAAAACAAGACAAGAGATAAGAATCAAGAGTGCA	AGAAAGTCAAGACAAGAAAAACAAGACAAGAGATAAGAATCAAGAGTACA	AGAAAGTCAAGACAAGAAAAACAAGACAAGAGATAAGAATCAAGATTACA	AGAAAGTCAAGACAAGAAAAACAAGACAAGAGACAAGAATCAAGATTACA	AGAAAGTCAAGACAAGAAAAACAAGACAAGAAACAAGAATCAAGATTACA	AGAAAGTCAAGACAAGAAAAACAAGACAAGAAACAAGACTCAAGATTACA	AGAAAGTCAAGACAAGAAAAACAAGACAAGAAACAAGACACAAGATTACA	AGAAAGTCAAGACAAGAAAAACAAGACAAGAAACAAGACACAAGATTACG	AGAAAGTCAAGACAAGAAAAACAAGACAAGAAACAAGACACAAGATTAAG	AGAAAGTCAAGACAAGAAATACAAGACAAGAAACAAGACACAAGATTAAG	AGAAAGTCAAGACAAGAATTACAAGACAAGAAACAAGACACAAGATTAAG	AGAAAGTCAAGACAAGAATTACAAGACAAGAAACAAGACACAAGATTAAG	AGAAAGTCAAGACAAGAATTACAAGACAAGAAACAAGACACAAGATTAAG	AGAAAGTCAAGACAAGAATTACAAGACAAGAAACAAGACACAAGATTAAG	AGAAAGTCAAGACAAGAATTACAAGACAAGAAACAAGACACAAGATTAAG	AGAAAGTCAAGACAAGAATTACAAGACAAGAAACAAGACACAAGATTAAG	AGAAAGTCAAGACAAGAATTACAAGACAAGAAACAAGACACAAGATTAAG	AGAAAGTCAAGACAAGAATTACAAGACAAGAAACAAGACACAAGATTAAG	AGAAAGTCAAGACAAGAATTACAAGACAAGAAACAAGACACAAGATTAAG	AGAAAGTCAAGACAAGAATTACAAGACAAGAAACAAGACACAAGATTAAG
126	GCGATACGACCTAGATCAAGCCTTGCCCCGGACCTGTTGTCCGTACTTGT	GCGATACGACCTAGATCAAGCCTTGCCCCGGACCTGTTGTCCGTACTAGT	GCGATACGACCTAGATCAAGACTTGCCCCGGACCTGTTGTCCGTACTAGT	GCGATACGACCTAGATCAAGACTTACCCCGGACCTGTTGTCCGTACTAGT	GCGATACGACCAAGATCAAGACTTACCCCGGACCTGTTGTCCGTACTAGT	GCGATACGACCAAGATCAAGACTTACCCCGGACCTGTTGTCCGTACAAGT	GCGATACGACCAAGATCAAGACTTACCCCGGACCTGTTGTCCGTACAAGA	GCGATACGACCAAGATCAAGACTTACCCCGGACCTGTAGTCCGTACAAGA	GCGATACGACCAAGATCAAGACTTACACCGGACCTGTAGTCCGTACAAGA	GCGATACGACCAAGATCAAGACTTACACAGGACCTGTAGTCCGTACAAGA	GCGATACGACCAAGATCAAGACTTACACAAGACCTGTAGTCCGTACAAGA	GCGATACGACCAAGATCAAGACTTACACAAGACCTATAGTCCGTACAAGA	GCGATACGACCAAGATCAAGACTTACACAAGACATATAGTCCGTACAAGA	GCGATACGACCAAGATCAAGACTTACACAAGATATATAGTCCGTACAAGA	GCGATACGACCAAGATCAAGACTTACACAAGATATATAGTCCATACAAGA	GCGATACGACCAAGATCAAGACTTACACAAGATATATAGTACATACAAGA	GCGATACAACCAAGATCAAGACTTACACAAGATATATAGTACATACAAGA	GCGATACAAGCAAGATCAAGACTTACACAAGATATATAGTACATACAAGA	GCTATACAAGCAAGATCAAGACTTACACAAGATATATAGTACATACAAGA	GTTATACAAGCAAGATCAAGACTTACACAAGATATATAGTACATACAAGA	GTTATACAAGCAAGATCAAGACTTACACAAGATATATAGTATATACAAGA	GTTATACAAGCAAGATCAAGACTTACACAAGATATATATTATATACAAGA	GTCATACAAGCAAGATCAAGACTTACACAAGATATATATTATATACAAGA	GTCCTACAAGCAAGATCAAGACTTACACAAGATATATATTATATACAAGA	GTCCTACAAACAAGATCAAGACTTACACAAGATATATATTATATACAAGA	GTCCTACAAACAAGATCAAGACTTATACAAGATATATATTATATACAAGA	GTCCTACAAACAAGATCAAGATTTATACAAGATATATATTATATACAAGA	GTCCTACAAACAAGATCAAGATATATACAAGATATATATTATATACAAGA	GTCCTACAAACAAGATCAAGTTATATACAAGATATATATTATATACAAGA	GTCCTACAAATAAGATCAAGTTATATACAAGATATATATTATATACAAGA	GTCCTACAAATAAGAACAAGTTATATACAAGATATATATTATATACAAGA	GTCCTACAAATAAGAACAAGCTATATACAAGATATATATTATATACAAGA	GTCCTACAAATAAGAACAAGCTATATACAAGATATATATTATATACAAGA	GTCCTACAAATAAGAACAAGCTATATACAAGATATATATTATATACAAGA	GTCCTACAAATAAGAACAAGCTATATACAAGATATATATTATATACAAGA	GTCCTACAAATAAGAACAAGCTATATACAAGATATATATTATATACAAGA	GTCCTACAAATAAGAACAAGCTATATACAAGATATATATTATATACAAGA	GTCCTACAAATAAGAACAAGCTATATACAAGATATATATTATATACAAGA	GTCCTACAAATAAGAACAAGCTATATACAAGATATATATTATATACAAGA	GTCCTACAAATAAGAACAAGCTATATACAAGATATATATTATATACAAGA	GTCCTACAAATAAGAACAAGCTATATACAAGATATATATTATATACAAGA
127	AACATTAGACGAATCACGCAGACATCAAAACCTTTGAGCATCTCATTCGC	AACATTAGACGAATCACGCAGACATCAAAACCTTTGAGCATCTCATTAGC	AACATTAGACGAATCACGCAGACATGAAAACCTTTGAGCATCTCATTAGC	AACATTAGACGAATCACGCAGACATGAAAACCTTTGAGCAACTCATTAGC	TACATTAGACGAATCACGCAGACATGAAAACCTTTGAGCAACTCATTAGC	TACATTAGACGAATCACGCAGACATGAAGACCTTTGAGCAACTCATTAGC	TACATTAGACGAATCAAGCAGACATGAAGACCTTTGAGCAACTCATTAGC	TACATTAGACTAATCAAGCAGACATGAAGACCTTTGAGCAACTCATTAGC	TACATTAGACTAATCAAGCAGACATGAAGACCTTTGAGCAAGTCATTAGC	TACATTAGACTAATCAAGCAGACATGAAGACCTTTGAGCAAGTCATTAGG	TACATTAGACTAATCAAGCAGACATGAAGACCTTTGAGCAAGTCATTATG	TACATTAGACTAATCAAGCAGACATGAAGACCTTTGAGCAAGTCAATATG	TACATTAGACTAATCAAGCAGACATGAAGACCTTTGAGCAAGTCAAGATG	TACATAAGACTAATCAAGCAGACATGAAGACCTTTGAGCAAGTCAAGATG	TACACAAGACTAATCAAGCAGACATGAAGACCTTTGAGCAAGTCAAGATG	TACACAAGACTAAACAAGCAGACATGAAGACCTTTGAGCAAGTCAAGATG	TACACAAGACTAAACAAGCAGACATGAAGACCTTTGAGCAAGACAAGATG	TACACAAGACTAAACAAGAAGACATGAAGACCTTTGAGCAAGACAAGATG	TACACAAGACTACACAAGAAGACATGAAGACCTTTGAGCAAGACAAGATG	TACACAAGATTACACAAGAAGACATGAAGACCTTTGAGCAAGACAAGATG	TACACAAGATTACACAAGAAGAGATGAAGACCTTTGAGCAAGACAAGATG	TACACAAGATTACACAAGAAAAGATGAAGACCTTTGAGCAAGACAAGATG	TACACAAGATTACACAAGACAAGATGAAGACCTTTGAGCAAGACAAGATG	TACACAAGATTACACAAGACAAGATGAAGACTTTTGAGCAAGACAAGATG	TACACAAGATTACACAAGACAAGATGAAGACTTTTGATCAAGACAAGATG	TACACAAGATTACACAAGACAAGATGAAGACTTTTGCTCAAGACAAGATG	TACACAAGATTACACAAGACAAGATGAAGACTTTTGCTAAAGACAAGATG	TACACAAGATTACACAAGACAAGATGAAGACTTTTGCTAAAGACAAGATG	TACACAAGATTACACAAGACAAGATGAAGACTTTTGCTAAAGACAAGATG	TACACAAGATTACACAAGACAAGATGAAGACTTTTGCTAAAGACAAGATG	TACACAAGATTACACAAGACAAGATGAAGACTTTTGCTAAAGACAAGATG	TACACAAGATTACACAAGACAAGATGAAGACTTTTGCTAAAGACAAGATG	TACACAAGATTACACAAGACAAGATGAAGACTTTTGCTAAAGACAAGATG	TACACAAGATTACACAAGACAAGATGAAGACTTTTGCTAAAGACAAGATG	TACACAAGATTACACAAGACAAGATGAAGACTTTTGCTAAAGACAAGATG	TACACAAGATTACACAAGACAAGATGAAGACTTTTGCTAAAGACAAGATG	TACACAAGATTACACAAGACAAGATGAAGACTTTTGCTAAAGACAAGATG	TACACAAGATTACACAAGACAAGATGAAGACTTTTGCTAAAGACAAGATG	TACACAAGATTACACAAGACAAGATGAAGACTTTTGCTAAAGACAAGATG	TACACAAGATTACACAAGACAAGATGAAGACTTTTGCTAAAGACAAGATG	TACACAAGATTACACAAGACAAGATGAAGACTTTTGCTAAAGACAAGATG
128	GTAAATCAGGTAAAGCTCTACCCCCATGCATGCTTTGCAAAAGATGCTAT	GTAAATCAGGTAAAGCTCTACCCCCAAGCATGCTTTGCAAAAGATGCTAT	GTAAATCAGGTAAAGCTCTACCCCCAAGCATGCTTTGCAAAAGATACTAT	GTAAATCAGGTAAAGCTCTACCCCCAAGCATGCTTTACAAAAGATACTAT	GTCAATCAGGTAAAGCTCTACCCCCAAGCATGCTTTACAAAAGATACTAT	GTCAATCAAGTAAAGCTCTACCCCCAAGCATGCTTTACAAAAGATACTAT	GTCAATCAAGTAAAGCTCTACCCCCAAGCATGCTATACAAAAGATACTAT	GTCAATCAAGTAAAGATCTACCCCCAAGCATGCTATACAAAAGATACTAT	GTCAATCAAGTAAAGATCTACACCCAAGCATGCTATACAAAAGATACTAT	GTCAATCAAGTAAAGATCTACACACAAGCATGCTATACAAAAGATACTAT	GTCAATCAAGTAAAGATCTACACACAAGCAAGCTATACAAAAGATACTAT	GTCAATCAAGTAAAGATCTACACACAAGCAAGATATACAAAAGATACTAT	GTCAATCAAGTAAAGATCTACATACAAGCAAGATATACAAAAGATACTAT	GTCAATCAAGTAAAGATCTACATACAAACAAGATATACAAAAGATACTAT	GTCAATCAAGTAAAGATCTACATACATACAAGATATACAAAAGATACTAT	GTCAATCAAGTAAAGATCTACATACATACAAGATATACAAAATATACTAT	GTCAATCAAGTAAAGATCTACATACATACAAGATATACAAAATATACAAT	GTCAATCAAGTAAAGATCTACATACATACAAGATATACAAAATATACAAG	GTCAATCAAGTAAAGATCTACATACATACAAGATATACAAACTATACAAG	GTCAATCAAGTAAAGATTTACATACATACAAGATATACAAACTATACAAG	GTCAAACAAGTAAAGATTTACATACATACAAGATATACAAACTATACAAG	GTCATACAAGTAAAGATTTACATACATACAAGATATACAAACTATACAAG	GTCCTACAAGTAAAGATTTACATACATACAAGATATACAAACTATACAAG	GTCCTACAAATAAAGATTTACATACATACAAGATATACAAACTATACAAG	GTCCTACAAATAAAGATTTACATATATACAAGATATACAAACTATACAAG	GTCCTACAAATAAAGATTTACATATATACAAGATATATAAACTATACAAG	GTCCTACAAATCAAGATTTACATATATACAAGATATATAAACTATACAAG	GTCCTACAAATCAAGATTTACTTATATACAAGATATATAAACTATACAAG	GTCCTACAAATCAAGATTTACTTATATACAAGATATATAAACTATACAAG	GTCCTACAAATCAAGATTTACTTATATACAAGATATATAAACTATACAAG	GTCCTACAAATCAAGATTTACTTATATACAAGATATATAAACTATACAAG	GTCCTACAAATCAAGATTTACTTATATACAAGATATATAAACTATACAAG	GTCCTACAAATCAAGATTTACTTATATACAAGATATATAAACTATACAAG	GTCCTACAAATCAAGATTTACTTATATACAAGATATATAAACTATACAAG	GTCCTACAAATCAAGATTTACTTATATACAAGATATATAAACTATACAAG	GTCCTACAAATCAAGATTTACTTATATACAAGATATATAAACTATACAAG	GTCCTACAAATCAAGATTTACTTATATACAAGATATATAAACTATACAAG	GTCCTACAAATCAAGATTTACTTATATACAAGATATATAAACTATACAAG	GTCCTACAAATCAAGATTTACTTATATACAAGATATATAAACTATACAAG	GTCCTACAAATCAAGATTTACTTATATACAAGATATATAAACTATACAAG	GTCCTACAAATCAAGATTTACTTATATACAAGATATATAAACTATACAAG
129	GTGGTGGTGGGATACTAAGCACCCAAGGCAATTGGCATCCGGCGATTACC	GTGGTGGTGGGATACTAAGCACACAAGGCAATTGGCATCCGGCGATTACC	GTGGTGGTGGGATACTAAGCACACAAGACAATTGGCATCCGGCGATTACC	GTGGTGGTGGGATACTAAGTACACAAGACAATTGGCATCCGGCGATTACC	GTGGTGGTGGGATACTAAGTACACAAGACAATTTGCATCCGGCGATTACC	GTGGTGGTGGGATACTAAGTACACAAGACAATTTGCATCCGGCGATGACC	GTGGTGGTGGGATACTAAGTACACAAGACAATTTGTATCCGGCGATGACC	GTCGTGGTGGGATACTAAGTACACAAGACAATTTGTATCCGGCGATGACC	GTCGTTGTGGGATACTAAGTACACAAGACAATTTGTATCCGGCGATGACC	GTCGTTGTGGGATACTAAGTACACAAGACAATTTGTATCCAGCGATGACC	GTCGTTGTGGGATACTAAGTACACAAGACAATTTGTATCCAGCGATGACA	GTCGTTGTGGGATACTAAATACACAAGACAATTTGTATCCAGCGATGACA	GTCGTTGTGGGATACTAAATAAACAAGACAATTTGTATCCAGCGATGACA	GTCGTTTTGGGATACTAAATAAACAAGACAATTTGTATCCAGCGATGACA	GTCGTTTTAGGATACTAAATAAACAAGACAATTTGTATCCAGCGATGACA	GTCGTTTTAGGATACTAAATAAACAAGACAATTTGTATACAGCGATGACA	GTCGTTTTAGGATACTAAATAAACAAGACAATTTGTATACAGCCATGACA	GTCGTTTTAGGATACTAAATAAACAAGACAATTCGTATACAGCCATGACA	GTCGTTTTAGGAAACTAAATAAACAAGACAATTCGTATACAGCCATGACA	GTCGTTATAGGAAACTAAATAAACAAGACAATTCGTATACAGCCATGACA	GTCGTTATAGGTAACTAAATAAACAAGACAATTCGTATACAGCCATGACA	GTCATTATAGGTAACTAAATAAACAAGACAATTCGTATACAGCCATGACA	GTCATTATAGGTAACTAAATAAACAAGACAAATCGTATACAGCCATGACA	GTCATTATAGGTAACTAAATAAACAAGACAAATCGTATATAGCCATGACA	GTCATTATAGGTAACTAAATAAACAAGACAAATCGTATATAGCCATGACT	GTCATCATAGGTAACTAAATAAACAAGACAAATCGTATATAGCCATGACT	GTCATCATAGGTAACTAAATAAACAAGACAAATCGTATATAGCCATGACT	GTCATCATAGGTAACTAAATAAACAAGACAAATCGTATATAGCCATGACT	GTCATCATAGGTAACTAAATAAACAAGACAAATCGTATATAGCCATGACT	GTCATCATAGGTAACTAAATAAACAAGACAAATCGTATATAGCCATGACT	GTCATCATAGGTAACTAAATAAACAAGACAAATCGTATATAGCCATGACT	GTCATCATAGGTAACTAAATAAACAAGACAAATCGTATATAGCCATGACT	GTCATCATAGGTAACTAAATAAACAAGACAAATCGTATATAGCCATGACT	GTCATCATAGGTAACTAAATAAACAAGACAAATCGTATATAGCCATGACT	GTCATCATAGGTAACTAAATAAACAAGACAAATCGTATATAGCCATGACT	GTCATCATAGGTAACTAAATAAACAAGACAAATCGTATATAGCCATGACT	GTCATCATAGGTAACTAAATAAACAAGACAAATCGTATATAGCCATGACT	GTCATCATAGGTAACTAAATAAACAAGACAAATCGTATATAGCCATGACT	GTCATCATAGGTAACTAAATAAACAAGACAAATCGTATATAGCCATGACT	GTCATCATAGGTAACTAAATAAACAAGACAAATCGTATATAGCCATGACT	GTCATCATAGGTAACTAAATAAACAAGACAAATCGTATATAGCCATGACT
130	ACGAGACCTCACAAGCGGAGACGTAGTACTGTGGCCATGACGAACCTAAT	ACGAGACCTCACAAGCGGAGACGTAGTACTGTGGCCAAGACGAACCTAAT	ACGAGACCTCACAAGCGAAGACGTAGTACTGTGGCCAAGACGAACCTAAT	ACGAGACCTCACAAGCGAAGACGTAGTACTGAGGCCAAGACGAACCTAAT	ACGAGACCTCACAAGCGAAGACGTACTACTGAGGCCAAGACGAACCTAAT	ACGAGACCTCACAAGCGAAGACGTACTACTGAGGCCAAGACGAACCTAAG	ACGAGACCTCACAAGCAAAGACGTACTACTGAGGCCAAGACGAACCTAAG	AAGAGACCTCACAAGCAAAGACGTACTACTGAGGCCAAGACGAACCTAAG	AAGAGACCTCACAAGCAAAGACGTACTACTGAGACCAAGACGAACCTAAG	AAGAGACCTCACAAGCAAAGACGTACTACTGAGACCAAGACGAAACTAAG	AAGAGACCTTACAAGCAAAGACGTACTACTGAGACCAAGACGAAACTAAG	AAAAGACCTTACAAGCAAAGACGTACTACTGAGACCAAGACGAAACTAAG	AAAAGACCTTACAAGCAAAGACGTACTACTGAGATCAAGACGAAACTAAG	AAAAGACCTTACAAGCAAAGACGTACTACTAAGATCAAGACGAAACTAAG	AAAAGACCTTACAAGCAAAGACATACTACTAAGATCAAGACGAAACTAAG	AAAAGCCCTTACAAGCAAAGACATACTACTAAGATCAAGACGAAACTAAG	AAAAGCCCTTACAAGAAAAGACATACTACTAAGATCAAGACGAAACTAAG	AAAAGCCCTTACAAGACAAGACATACTACTAAGATCAAGACGAAACTAAG	AAAAGCCCTTACAAGACAAGACATACTACTAAGATCAAGACTAAACTAAG	AAAGGCCCTTACAAGACAAGACATACTACTAAGATCAAGACTAAACTAAG	AAAGGCCCTTACAAGACAAGACTTACTACTAAGATCAAGACTAAACTAAG	AAAGGCCCTTACAAGACAAGAATTACTACTAAGATCAAGACTAAACTAAG	AAAGGCCCTTACAAGACAAGAATTACTACAAAGATCAAGACTAAACTAAG	AAAGGCCCTTACAAGACAAGAATTACTACAAAGATCAAGATTAAACTAAG	AAAGGCCCATACAAGACAAGAATTACTACAAAGATCAAGATTAAACTAAG	AAAGGCCTATACAAGACAAGAATTACTACAAAGATCAAGATTAAACTAAG	AAAGTCCTATACAAGACAAGAATTACTACAAAGATCAAGATTAAACTAAG	AAAGTCCTACACAAGACAAGAATTACTACAAAGATCAAGATTAAACTAAG	AAAGTCCTACACAAGACAAGAATTACTACAAAGATCAAGATTAAACTAAG	AAAGTCCTACACAAGACAAGAATTACTACAAAGATCAAGATTAAACTAAG	AAAGTCCTACACAAGACAAGAATTACTACAAAGATCAAGATTAAACTAAG	AAAGTCCTACACAAGACAAGAATTACTACAAAGATCAAGATTAAACTAAG	AAAGTCCTACACAAGACAAGAATTACTACAAAGATCAAGATTAAACTAAG	AAAGTCCTACACAAGACAAGAATTACTACAAAGATCAAGATTAAACTAAG	AAAGTCCTACACAAGACAAGAATTACTACAAAGATCAAGATTAAACTAAG	AAAGTCCTACACAAGACAAGAATTACTACAAAGATCAAGATTAAACTAAG	AAAGTCCTACACAAGACAAGAATTACTACAAAGATCAAGATTAAACTAAG	AAAGTCCTACACAAGACAAGAATTACTACAAAGATCAAGATTAAACTAAG	AAAGTCCTACACAAGACAAGAATTACTACAAAGATCAAGATTAAACTAAG	AAAGTCCTACACAAGACAAGAATTACTACAAAGATCAAGATTAAACTAAG	AAAGTCCTACACAAGACAAGAATTACTACAAAGATCAAGATTAAACTAAG
131	CACCTTAAGCTCCAGCTTTTCCTCAGTTCTACATACCCCTTCACGTGGGC	CACCTTAAGCTCCAGCTTTTCCTCAGTTCTACATACCCCTTCACGTGAGC	CACCTTAAGCTCCAGCTTTTCCTCAGTTCTACATACCCCTACACGTGAGC	CACCTTAAGCTCCAGCTTTTCCTCAGTTCTACATACCCCTACAAGTGAGC	CACCTTAAGCTCCAGATTTTCCTCAGTTCTACATACCCCTACAAGTGAGC	CACCTTAAGCTACAGATTTTCCTCAGTTCTACATACCCCTACAAGTGAGC	GACCTTAAGCTACAGATTTTCCTCAGTTCTACATACCCCTACAAGTGAGC	GACCTTAAGCTACAGATTTTCCTCAGTTCTACATAACCCTACAAGTGAGC	GACCTTAAGCTACAGATTTTACTCAGTTCTACATAACCCTACAAGTGAGC	GACCTTAAGCTACAGATTTTACTAAGTTCTACATAACCCTACAAGTGAGC	GACCTTAAGCTACAGATTTTACTAAGTTCTACATAACACTACAAGTGAGC	GACCTTAAGCTACAGATTTTACTAAGTTATACATAACACTACAAGTGAGC	GACCTTAAGCTACAGATTTTACTAAGTTATATATAACACTACAAGTGAGC	GACCTTAAGCTACAAATTTTACTAAGTTATATATAACACTACAAGTGAGC	GACCTTAAGCTACAAATTTTACAAAGTTATATATAACACTACAAGTGAGC	GACCTTAAGCTACAAATTTTACAAAGTTATATATAACACTACAAGTAAGC	GACCTTAAGCTACAAATTTTACAAAGTTATATATAACACTACAAGTAAGA	GACCTTAAGCTACAAATTTTACAAAGTTATATATAACACTACAAGCAAGA	GACCTTAAGCTACAAATTTTACAAAGTTATATATAACACTACAAACAAGA	GACTTTAAGCTACAAATTTTACAAAGTTATATATAACACTACAAACAAGA	GTCTTTAAGCTACAAATTTTACAAAGTTATATATAACACTACAAACAAGA	GTATTTAAGCTACAAATTTTACAAAGTTATATATAACACTACAAACAAGA	GTATATAAGCTACAAATTTTACAAAGTTATATATAACACTACAAACAAGA	TTATATAAGCTACAAATTTTACAAAGTTATATATAACACTACAAACAAGA	TTATATAAGCTACAAATTTTACAAAGTTATATATAAAACTACAAACAAGA	TTATATAAGCTACAAATTTTACAAAGATATATATAAAACTACAAACAAGA	TTATATAAGCTACAAATTTTACAAATATATATATAAAACTACAAACAAGA	TTATATAAGCTACAAATTTTACATATATATATATAAAACTACAAACAAGA	TTATATAAGCTACAAATTTTATATATATATATATAAAACTACAAACAAGA	TTATATAAGCTACATATTTTATATATATATATATAAAACTACAAACAAGA	TTATATAAGCTATATATTTTATATATATATATATAAAACTACAAACAAGA	TTATATAAACTATATATTTTATATATATATATATAAAACTACAAACAAGA	TTATATAAACTATATATATTATATATATATATATAAAACTACAAACAAGA	TTATATAAACTATATATACTATATATATATATATAAAACTACAAACAAGA	TTATATAAACTATATATACTATATATATATATATAAAACTACAAACAAGA	TTATATAAACTATATATACTATATATATATATATAAAACTACAAACAAGA	TTATATAAACTATATATACTATATATATATATATAAAACTACAAACAAGA	TTATATAAACTATATATACTATATATATATATATAAAACTACAAACAAGA	TTATATAAACTATATATACTATATATATATATATAAAACTACAAACAAGA	TTATATAAACTATATATACTATATATATATATATAAAACTACAAACAAGA	TTATATAAACTATATATACTATATATATATATATAAAACTACAAACAAGA
132	TTGCAAACACTAAATGTAATGACCGTACCTCGGGTTTGCCCCGTCGTGTA	TTGCAAACACTAAATGTATTGACCGTACCTCGGGTTTGCCCCGTCGTGTA	TTGCAAACACTAAAAGTATTGACCGTACCTCGGGTTTGCCCCGTCGTGTA	TTGCAAACACTAAAAGTATTGACCGTACCTCGGGTATGCCCCGTCGTGTA	TTGCAAACACTAAAAGTATTGACCGTACCTCGAGTATGCCCCGTCGTGTA	TTACAAACACTAAAAGTATTGACCGTACCTCGAGTATGCCCCGTCGTGTA	TTACAAACACTAAAAGTATTGACCGTACATCGAGTATGCCCCGTCGTGTA	TTACAAACACTAAAAGTATTGACCGTACATCGAGTATGACCCGTCGTGTA	TTACAAACACTAAAAGTATTGACCGTACATCGAGTATGACCCGTCGTGAA	TTACAAACACTAAAAGTATTGACCGTACATCGAATATGACCCGTCGTGAA	TTACAAACACTAAAAGTATTTACCGTACATCGAATATGACCCGTCGTGAA	TTACAAACACTAAAAGTATTTAACGTACATCGAATATGACCCGTCGTGAA	TTACATACACTAAAAGTATTTAACGTACATCGAATATGACCCGTCGTGAA	TTACATACACTAAAAGTATATAACGTACATCGAATATGACCCGTCGTGAA	TTACATACACTAAAAGTATATAACGTACATCGAATATGACCCGTGGTGAA	TTACATACACTAAAAGTATATAACGTACATCAAATATGACCCGTGGTGAA	TTACATACACTAAAAGTATATAACGTACATAAAATATGACCCGTGGTGAA	TTACATACACTAAAAGTATATAACCTACATAAAATATGACCCGTGGTGAA	TTACATACACTAAAAGTATATAAACTACATAAAATATGACCCGTGGTGAA	TTACATACACTAAAAGTATATAAACTACATACAATATGACCCGTGGTGAA	TTACATACACTAAAAGTATATAAACTACATACAAGATGACCCGTGGTGAA	TTACATACACTAAAAGTATATAAACTACATACAAGATGACTCGTGGTGAA	TTACATACACTAAAAGTATATAAACTATATACAAGATGACTCGTGGTGAA	TTACATACACTAAAAGTATATAAACTATATACAAGATGACTCGTGTTGAA	TTACATACAATAAAAGTATATAAACTATATACAAGATGACTCGTGTTGAA	TTACATACAAGAAAAGTATATAAACTATATACAAGATGACTCGTGTTGAA	TTACATACAAGAAAACTATATAAACTATATACAAGATGACTCGTGTTGAA	TTACATACAAGAAAACTATATAAACTATATACAAGATGACTCGTGTTGAG	TTACATACAAGAAAACTATATAAACTATATACAAGATGACTCGTGTTAAG	TTACATACAAGAAAACTATATAAACTATATACAAGATGACACGTGTTAAG	TTACATACAAGAAAACTATATAAACTATATACAAGATGACAGGTGTTAAG	TTACATACAAGAAAACTATATAAACTATATACAAGATGACAGGTGTTAAG	TTACATACAAGAAAACTATATAAACTATATACAAGATGACAGGTGTTAAG	TTACATACAAGAAAACTATATAAACTATATACAAGATGACAGGTGTTAAG	TTACATACAAGAAAACTATATAAACTATATACAAGATGACAGGTGTTAAG	TTACATACAAGAAAACTATATAAACTATATACAAGATGACAGGTGTTAAG	TTACATACAAGAAAACTATATAAACTATATACAAGATGACAGGTGTTAAG	TTACATACAAGAAAACTATATAAACTATATACAAGATGACAGGTGTTAAG	TTACATACAAGAAAACTATATAAACTATATACAAGATGACAGGTGTTAAG	TTACATACAAGAAAACTATATAAACTATATACAAGATGACAGGTGTTAAG	TTACATACAAGAAAACTATATAAACTATATACAAGATGACAGGTGTTAAG
133	GGCTTTCTGCGCCTGATTACGATAAACCACGATACAAAACCTGCACTACA	GGCTTTCTGCGCCTGATTACGATAAACCAAGATACAAAACCTGCACTACA	GGCTTTCTGCGCCTGATTACGATAAACCAAGATACAAAACCTACACTACA	GGCTTTCTGAGCCTGATTACGATAAACCAAGATACAAAACCTACACTACA	GGCTTTCTGAGCCTGATTACGATAAACCAAGATACAAGACCTACACTACA	GGCTTTCTGAGCCTGATTACGATAAACCAAGATACAAGAACTACACTACA	GGCTTTCAGAGCCTGATTACGATAAACCAAGATACAAGAACTACACTACA	GTCTTTCAGAGCCTGATTACGATAAACCAAGATACAAGAACTACACTACA	GTCTTTCAGAGCCTGATTACGATAAATCAAGATACAAGAACTACACTACA	GTCTTTCAGAGCCTGATTACGAGAAATCAAGATACAAGAACTACACTACA	GTCTTTCAGAGCCTGATTACAAGAAATCAAGATACAAGAACTACACTACA	GTCTTTCAGAGCCTGATAACAAGAAATCAAGATACAAGAACTACACTACA	GTCATTCAGAGCCTGATAACAAGAAATCAAGATACAAGAACTACACTACA	GTCATTCACAGCCTGATAACAAGAAATCAAGATACAAGAACTACACTACA	GTCATTCACAGCCTGATAACAAGAAATCAAGATACAAGAACTACACTACG	GTCATTCACAGCCTGATAACAAGAAATCAAGATACAAGAATTACACTACG	GTCATTTACAGCCTGATAACAAGAAATCAAGATACAAGAATTACACTACG	GTCATTTACAGCCAGATAACAAGAAATCAAGATACAAGAATTACACTACG	GTCATTTACAGCAAGATAACAAGAAATCAAGATACAAGAATTACACTACG	GTCATTTACAGCAAGAAAACAAGAAATCAAGATACAAGAATTACACTACG	GTCATTTACAGCAAGAAAAAAAGAAATCAAGATACAAGAATTACACTACG	GTCATTTACAGCAAGACAAAAAGAAATCAAGATACAAGAATTACACTACG	GTCATTTAAAGCAAGACAAAAAGAAATCAAGATACAAGAATTACACTACG	GTCAGTTAAAGCAAGACAAAAAGAAATCAAGATACAAGAATTACACTACG	GTCAGTTAAAGCAAGACAAAAAGAAATCAAGATACAAGAATTACACTACG	GTCAGTTAAAGCAAGACAAAAAGAAATCAAGATACAAGAATTACACTACG	GTCAGTTAAAGCAAGACAAAAAGAAATCAAGATACAAGAATTACACTACG	GTCAGTTAAAGCAAGACAAAAAGAAATCAAGATACAAGAATTACACTACG	GTCAGTTAAAGCAAGACAAAAAGAAATCAAGATACAAGAATTACACTACG	GTCAGTTAAAGCAAGACAAAAAGAAATCAAGATACAAGAATTACACTACG	GTCAGTTAAAGCAAGACAAAAAGAAATCAAGATACAAGAATTACACTACG	GTCAGTTAAAGCAAGACAAAAAGAAATCAAGATACAAGAATTACACTACG	GTCAGTTAAAGCAAGACAAAAAGAAATCAAGATACAAGAATTACACTACG	GTCAGTTAAAGCAAGACAAAAAGAAATCAAGATACAAGAATTACACTACG	GTCAGTTAAAGCAAGACAAAAAGAAATCAAGATACAAGAATTACACTACG	GTCAGTTAAAGCAAGACAAAAAGAAATCAAGATACAAGAATTACACTACG	GTCAGTTAAAGCAAGACAAAAAGAAATCAAGATACAAGAATTACACTACG	GTCAGTTAAAGCAAGACAAAAAGAAATCAAGATACAAGAATTACACTACG	GTCAGTTAAAGCAAGACAAAAAGAAATCAAGATACAAGAATTACACTACG	GTCAGTTAAAGCAAGACAAAAAGAAATCAAGATACAAGAATTACACTACG	GTCAGTTAAAGCAAGACAAAAAGAAATCAAGATACAAGAATTACACTACG
134	TGCACGGGTTGACTACTGCCCGGGAGGTTCCGACACATTGTCGACATATA	TGCACGGGATGACTACTGCCCGGGAGGTTCCGACACATTGTCGACATATA	TGCACGGGATGACTACTTCCCGGGAGGTTCCGACACATTGTCGACATATA	TGCACGAGATGACTACTTCCCGGGAGGTTCCGACACATTGTCGACATATA	TGCACGAGATGACTAATTCCCGGGAGGTTCCGACACATTGTCGACATATA	TACACGAGATGACTAATTCCCGGGAGGTTCCGACACATTGTCGACATATA	TACACGAGATGACTAATTCCCGGGAGGTTCCGACAAATTGTCGACATATA	TACACGAGATGACTAATTCCCGGGAGGTTCCTACAAATTGTCGACATATA	TACACGAGATGACTAATTCCCGGGAGGTTACTACAAATTGTCGACATATA	TACACGAGATGACTAATTCCCGGGAGGTTACTACAAATTGTCGATATATA	TACACGAGATGACTAATTCCCGGGAGGTTACTACAAATTGTCTATATATA	TACAAGAGATGACTAATTCCCGGGAGGTTACTACAAATTGTCTATATATA	TACAAGAGATGACTAATTCCCGGGAGTTTACTACAAATTGTCTATATATA	TACAAGAGATGACTAATTCCCAGGAGTTTACTACAAATTGTCTATATATA	TACAAGAGATGACTAAGTCCCAGGAGTTTACTACAAATTGTCTATATATA	TACAAGAGATGACTAAGTCCCAGAAGTTTACTACAAATTGTCTATATATA	TACAAGAGATGACTAAGTCCCAGAAGTTTACTACAAATTGTATATATATA	TACAAGAGATGACTAAGTCCCAGAAGTTTACTACAAAGTGTATATATATA	TACAAGAGATGACTAAGTCCCAGAAGTTTACTACAAAGTGTATATATAAA	TACAAGAGATGACTAAGTCCCAGAAGTTTACTACAAAGTCTATATATAAA	TACAAGAGATGACTAAGTCCCAGAAGTTTACTACAAAGACTATATATAAA	TACAAGAGATGACTAAGTCCCAGAAGTTTACTACAAAGACTATATATAAG	TACAAGAGATGACTAAGTCCCAGAAGTTTACTACAAAGACTATATACAAG	TACAAGAGATGACTAAGTCCCAGAAGTTTACTACAAAGATTATATACAAG	TACAAGAGATGACTAAGTCCAAGAAGTTTACTACAAAGATTATATACAAG	TACAAGAGATGACTAAATCCAAGAAGTTTACTACAAAGATTATATACAAG	TACAAGAGATGACTAAATACAAGAAGTTTACTACAAAGATTATATACAAG	TCCAAGAGATGACTAAATACAAGAAGTTTACTACAAAGATTATATACAAG	TCCAAGAGATGACTAAATACAAGAAGTTTACTACTAAGATTATATACAAG	TCCAAGAGATGACTAAATACAAGAAGTATACTACTAAGATTATATACAAG	TCCAAGAGATGACTAAATACAAGAAGTATACTACTAAGATTATATACAAG	TCCAAGAGATGACTAAATACAAGAAGTATACTACTAAGATTATATACAAG	TCCAAGAGATGACTAAATACAAGAAGTATACTACTAAGATTATATACAAG	TCCAAGAGATGACTAAATACAAGAAGTATACTACTAAGATTATATACAAG	TCCAAGAGATGACTAAATACAAGAAGTATACTACTAAGATTATATACAAG	TCCAAGAGATGACTAAATACAAGAAGTATACTACTAAGATTATATACAAG	TCCAAGAGATGACTAAATACAAGAAGTATACTACTAAGATTATATACAAG	TCCAAGAGATGACTAAATACAAGAAGTATACTACTAAGATTATATACAAG	TCCAAGAGATGACTAAATACAAGAAGTATACTACTAAGATTATATACAAG	TCCAAGAGATGACTAAATACAAGAAGTATACTACTAAGATTATATACAAG	TCCAAGAGATGACTAAATACAAGAAGTATACTACTAAGATTATATACAAG
135	CCTTATAGCAAAACGTGGAACGCCATAATTGGGCCTTAAAAACCAAGTGC	CCTTATAGCAAAACGTGGAACGCCATAATTGGGCCTTAAAAACCATGTGC	CCTTATAGCAAAACGTGGAACGCCATAATTGAGCCTTAAAAACCATGTGC	CCTTACAGCAAAACGTGGAACGCCATAATTGAGCCTTAAAAACCATGTGC	CCTTACAGCAAAACGTGGAACGCCATAATTGAGACTTAAAAACCATGTGC	CCTTACAGCAAAACGTGGAACGCCATAATTAAGACTTAAAAACCATGTGC	CCTTACAGCAAAACGTGGAACGACATAATTAAGACTTAAAAACCATGTGC	CCTTACAGCAAAACGTGGAACTACATAATTAAGACTTAAAAACCATGTGC	CCTTACAGCAAAACGTTGAACTACATAATTAAGACTTAAAAACCATGTGC	ACTTACAGCAAAACGTTGAACTACATAATTAAGACTTAAAAACCATGTGC	ACTTACAGCAAAACGTTGAACTACATAATTAAGACTTAAAAACCATGTGT	ACTTACAGCAAAACGTTGAACTACATAATTAAGACTTAAAAACCATGAGT	ACTTACAGCAAAACGTTGAACTACATATTTAAGACTTAAAAACCATGAGT	ACTTACAGCAAAACGTTGAACTACATATATAAGACTTAAAAACCATGAGT	ACTTACAGCAAAACGTTAAACTACATATATAAGACTTAAAAACCATGAGT	ACTTACAGCAAGACGTTAAACTACATATATAAGACTTAAAAACCATGAGT	ACTTACAGCAAGACGATAAACTACATATATAAGACTTAAAAACCATGAGT	ACTTACAGCAAGACGATAAACTATATATATAAGACTTAAAAACCATGAGT	ACTTACAGCAAGACTATAAACTATATATATAAGACTTAAAAACCATGAGT	ACTTACAGCAAGACTATAAACTATATATATAAGACTTAAAAACCATGACT	ACTTACAGCAAGACTATAAACTATATATATAAGACTTAAGAACCATGACT	AATTACAGCAAGACTATAAACTATATATATAAGACTTAAGAACCATGACT	AATTACAGCAAGACTATAAACTATATATATAAGACTTAAGAAACATGACT	AATTACAGCAAGACTATAAACTATATATATAAGACTCAAGAAACATGACT	AATTACAGCAAGACTATAAACTATTTATATAAGACTCAAGAAACATGACT	AATTACAGCAAGACTATAAACTATTTATATAAGACACAAGAAACATGACT	AATTACATCAAGACTATAAACTATTTATATAAGACACAAGAAACATGACT	AATTACATCAAGACTACAAACTATTTATATAAGACACAAGAAACATGACT	AATTACATCAAGACTACAAACTATTTATATAAGACACAAGAAACATGACT	AATTACATCAAGACTACAAACTATTTATATAAGACACAAGAAACATGACT	AATTACATCAAGACTACAAACTATTTATATAAGACACAAGAAACATGACT	AATTACATCAAGACTACAAACTATTTATATAAGACACAAGAAACATGACT	AATTACATCAAGACTACAAACTATTTATATAAGACACAAGAAACATGACT	AATTACATCAAGACTACAAACTATTTATATAAGACACAAGAAACATGACT	AATTACATCAAGACTACAAACTATTTATATAAGACACAAGAAACATGACT	AATTACATCAAGACTACAAACTATTTATATAAGACACAAGAAACATGACT	AATTACATCAAGACTACAAACTATTTATATAAGACACAAGAAACATGACT	AATTACATCAAGACTACAAACTATTTATATAAGACACAAGAAACATGACT	AATTACATCAAGACTACAAACTATTTATATAAGACACAAGAAACATGACT	AATTACATCAAGACTACAAACTATTTATATAAGACACAAGAAACATGACT	AATTACATCAAGACTACAAACTATTTATATAAGACACAAGAAACATGACT
136	CGAAGATCTTGTCCCCTGGTACCGTGAACGCCGCACACACTGACTCACGG	CGAAGATCTTGTCCCCTGGTACCGTGAACGCCGCACACACTGACTCAAGG	CGAAGATCTTGTCCCCTGGTACCATGAACGCCGCACACACTGACTCAAGG	AGAAGATCTTGTCCCCTGGTACCATGAACGCCGCACACACTGACTCAAGG	AGAAGATCTTGTCCCCTGGTACCATGAACGCCGCACACACTGACTCAATG	AGAAGATCTTGTCCCCTGGTACCATGAACGCCGCACACACTGACACAATG	AGAAGATCTTGTCCCCTGGAACCATGAACGCCGCACACACTGACACAATG	AGAAGATCTAGTCCCCTGGAACCATGAACGCCGCACACACTGACACAATG	AGAAAATCTAGTCCCCTGGAACCATGAACGCCGCACACACTGACACAATG	AGAAAATCTAGTCACCTGGAACCATGAACGCCGCACACACTGACACAATG	AGAAAATCTAGTCACCTGGAACCATGAAAGCCGCACACACTGACACAATG	AGAAAATCTAGTCACCTGGAACCATGAAAGACGCACACACTGACACAATG	AGAAAATCTAGTCACCTGGAACCATGAAAGACGCACACACTGAAACAATG	AGAAAATTTAGTCACCTGGAACCATGAAAGACGCACACACTGAAACAATG	AGAAAATTAAGTCACCTGGAACCATGAAAGACGCACACACTGAAACAATG	AGAAAATTAAGTCACCTGGAACCATGAAAGACGAACACACTGAAACAATG	AGAAAATTAAGTCACCTGGAACCATGAAAGACGAACACACTGAAGCAATG	AGAAAATTAAGTCACCTGGAACCATGAAAGACGAACATACTGAAGCAATG	AGAAAATTAAGTCACCTGTAACCATGAAAGACGAACATACTGAAGCAATG	AGAAAATTAAGACACCTGTAACCATGAAAGACGAACATACTGAAGCAATG	AGAAAAGTAAGACACCTGTAACCATGAAAGACGAACATACTGAAGCAATG	AGAAAAGTAAGACACCTATAACCATGAAAGACGAACATACTGAAGCAATG	AGAAAAGTAAGACACATATAACCATGAAAGACGAACATACTGAAGCAATG	AGAAAAGTAAGACACAAATAACCATGAAAGACGAACATACTGAAGCAATG	AGAAAAGTAAGACACAAATAACTATGAAAGACGAACATACTGAAGCAATG	AGAAAAGCAAGACACAAATAACTATGAAAGACGAACATACTGAAGCAATG	AGACAAGCAAGACACAAATAACTATGAAAGACGAACATACTGAAGCAATG	AGACAAGCAAGACACAAATAACTATGAAAGACGAACCTACTGAAGCAATG	AGACAAGCAAGACACAAATAACTATGAAAGACGAATCTACTGAAGCAATG	AGACAAGCAAGACACAAATAACTATGAAAGACAAATCTACTGAAGCAATG	AGACAAGCAAGACACAAATAACTATGAAAGACAAATCTACAGAAGCAATG	AGACAAGCAAGACACAAATAACTATGAAAGACAAATCTACACAAGCAATG	AGACAAGCAAGACACAAATAACTATGAAAGACAAATCTACACAAGCAAGG	AGACAAGCAAGACACAAATAACTATGAAAGACAAAACTACACAAGCAAGG	AGACAAGCAAGACACAAATAACTATGAAAGACAAGACTACACAAGCAAGG	AGACAAGCAAGACACAAATAACTATGAAAGACAAGACTACACAAGCAAGA	AGACAAGCAAGACACAAATAACTATGAAAGACAAGACTACGCAAGCAAGA	AGACAAGCAAGACACAAATAACTATGAAAGACAAGACTACGCAAGCAAGA	AGACAAGCAAGACACAAATAACTATGAAAGACAAGACTACGCAAGCAAGA	AGACAAGCAAGACACAAATAACTATGAAAGACAAGACTACGCAAGCAAGA	AGACAAGCAAGACACAAATAACTATGAAAGACAAGACTACGCAAGCAAGA
137	ATCCAGTGCGCCATCTGTGGACTACTAAACCATACTCGGGTATGCCTCGC	ATCCAGTGCGCCATCTGTGGACTACTAAACCATACTCGAGTATGCCTCGC	ATCCAGTGCGCCATCTGTGGACTACTAAACCATACTCGAGTATGCCTAGC	ATCCAGTGCGCCATCTGTGTACTACTAAACCATACTCGAGTATGCCTAGC	ATCCAGTGCGCCATCAGTGTACTACTAAACCATACTCGAGTATGCCTAGC	ATCCAGTGCGCCATCAGTCTACTACTAAACCATACTCGAGTATGCCTAGC	ATCCAGTGCGCCATCAGTCTACTACTAAACTATACTCGAGTATGCCTAGC	ATCCAGTGCGCCATCAGTCTACTACTAAACTAAACTCGAGTATGCCTAGC	ATCCAGTGCGCCATCAGTCTACTACTAAACTAAACTCAAGTATGCCTAGC	ATCCAGTGCACCATCAGTCTACTACTAAACTAAACTCAAGTATGCCTAGC	ATCCAGTGCACAATCAGTCTACTACTAAACTAAACTCAAGTATGCCTAGC	ATCCAGTGCACAATCAGTCTACTACTAAACTAAACTCAAGTATGCCTAGT	ATCCAGTGCACAATCAGTCTACTACTAAACTAAACTCAAGTATGACTAGT	ATCAAGTGCACAATCAGTCTACTACTAAACTAAACTCAAGTATGACTAGT	AGCAAGTGCACAATCAGTCTACTACTAAACTAAACTCAAGTATGACTAGT	AGAAAGTGCACAATCAGTCTACTACTAAACTAAACTCAAGTATGACTAGT	AGAAAGTACACAATCAGTCTACTACTAAACTAAACTCAAGTATGACTAGT	AGAAAGTACACAATCAGTCTACTACTAAACTAAACTCAAGAATGACTAGT	AGAAAGTACAAAATCAGTCTACTACTAAACTAAACTCAAGAATGACTAGT	AGAAAGTACAAAGTCAGTCTACTACTAAACTAAACTCAAGAATGACTAGT	AGAAAGTACAAAGACAGTCTACTACTAAACTAAACTCAAGAATGACTAGT	AGAAACTACAAAGACAGTCTACTACTAAACTAAACTCAAGAATGACTAGT	AGAAACTACAAAGACAATCTACTACTAAACTAAACTCAAGAATGACTAGT	AGAAACTACAAAGACAATCTACTACTAAACTAAAGTCAAGAATGACTAGT	AGAAACTACAAAGACAATCTACTACTAAACTAAAGACAAGAATGACTAGT	AGAAACTACAAAGACAATCTACTACTAAACTAAATACAAGAATGACTAGT	AGAAACTACAAAGACAATCTACTACTAAACTAAATACAAGAATTACTAGT	AGAAACTACAAAGACAATCTACTACTAAACTAAATACAAGAATTACTACT	AGAAACTACAAAGACAATCTACTACTAAACTACATACAAGAATTACTACT	AGAAACTACAAAGACAATCTACTACTAAACTACATACAAGAATTACTACG	AGAAACTACAAAGACAATCTACTACTAAACTACATACAAGAATTACTAAG	AGAAACTACAAAGACAATCTACTACTAAACTACATACAAGAATTACAAAG	AGAAACTACAAAGACAATCTACTACTAAACTACATACAAGATTTACAAAG	AGAAACTACAAAGACAATCTACTACTAAACTACATACAAGATTTACAAAG	AGAAACTACAAAGACAATCTACTACTAAACTACATACAAGATTTACAAAG	AGAAACTACAAAGACAATCTACTACTAAACTACATACAAGATTTACAAAG	AGAAACTACAAAGACAATCTACTACTAAACTACATACAAGATTTACAAAG	AGAAACTACAAAGACAATCTACTACTAAACTACATACAAGATTTACAAAG	AGAAACTACAAAGACAATCTACTACTAAACTACATACAAGATTTACAAAG	AGAAACTACAAAGACAATCTACTACTAAACTACATACAAGATTTACAAAG	AGAAACTACAAAGACAATCTACTACTAAACTACATACAAGATTTACAAAG
138	CGCAAGAAGCGGTAGGACCCAAAACTGCAACGAGGAACGGCCCTGCCCAC	CGCAAGAAGCGGTAGGACCCAAAACTGCAACGATGAACGGCCCTGCCCAC	CGCAAGAAGCGGTAGGACCCAAAACTGCAACGATGAACGGCCCAGCCCAC	CGCAAGAAGCAGTAGGACCCAAAACTGCAACGATGAACGGCCCAGCCCAC	CGCAAGAAGCAGTAAGACCCAAAACTGCAACGATGAACGGCCCAGCCCAC	CGCAAGAAGCAGCAAGACCCAAAACTGCAACGATGAACGGCCCAGCCCAC	CGCAAGAAGCAGCAAGACACAAAACTGCAACGATGAACGGCCCAGCCCAC	CGCAAGAAGCAGCAAGACACAAAACTACAACGATGAACGGCCCAGCCCAC	CGCAAGAAGCAGCAAGACACAAAACTACAACGATGAACGGCCCAGCCCAG	CGCAAGAAGCAGCAAGACACAAAACTACAACGATGAACGGCCCAGCCAAG	CGCAAGAAGCAGCAAGACACAAAACTACAAAGATGAACGGCCCAGCCAAG	AGCAAGAAGCAGCAAGACACAAAACTACAAAGATGAACGGCCCAGCCAAG	AGCAAGAAGCAGCAAGACACAAAACTACAAAGATGAACGGTCCAGCCAAG	AGCAAGAAGCAGCAAGACACAAAACTACAAAGATGAACGGTCCAGACAAG	AGCAAGAAGCAGCAAGACACAAAACTACAAAGATAAACGGTCCAGACAAG	AGCAAGAAGCAGCAAGACACAAAACTACAAAGATAAACGGTCAAGACAAG	AGCAAGAAGCAGCAAGACACAAAACTACAAAGATAAACAGTCAAGACAAG	AGCAAGAAGCAGCAAGACACAAAACTACAAAGATATACAGTCAAGACAAG	AGCAAGAAGCAGCAAGATACAAAACTACAAAGATATACAGTCAAGACAAG	AGCAAGAAACAGCAAGATACAAAACTACAAAGATATACAGTCAAGACAAG	AGCAAGAAAAAGCAAGATACAAAACTACAAAGATATACAGTCAAGACAAG	AGCAAGAGAAAGCAAGATACAAAACTACAAAGATATACAGTCAAGACAAG	AGCAAGAGAAAGCAAGATACAAAACTACAAAGATATACAGACAAGACAAG	AGCAAGAGAAAGCAAGATACAAAACTACAAAGATATACATACAAGACAAG	AGCAAGAGAAAGCAAGATACAAAACTACAAAGATATATATACAAGACAAG	AGCAAGAGAAAGCAAGATACAAGACTACAAAGATATATATACAAGACAAG	AGCAAGAGAAAGCAAGATACAAGATTACAAAGATATATATACAAGACAAG	AGCAAGAGAAAGCAAGATACAAGATTACAAAGCTATATATACAAGACAAG	AGCAAGAGAAAGCAAGATACAAGATTACAAAGCTATATATACAAGACAAG	AGCAAGAGAAAGCAAGATACAAGATTACAAAGCTATATATACAAGACAAG	AGCAAGAGAAAGCAAGATACAAGATTACAAAGCTATATATACAAGACAAG	AGCAAGAGAAAGCAAGATACAAGATTACAAAGCTATATATACAAGACAAG	AGCAAGAGAAAGCAAGATACAAGATTACAAAGCTATATATACAAGACAAG	AGCAAGAGAAAGCAAGATACAAGATTACAAAGCTATATATACAAGACAAG	AGCAAGAGAAAGCAAGATACAAGATTACAAAGCTATATATACAAGACAAG	AGCAAGAGAAAGCAAGATACAAGATTACAAAGCTATATATACAAGACAAG	AGCAAGAGAAAGCAAGATACAAGATTACAAAGCTATATATACAAGACAAG	AGCAAGAGAAAGCAAGATACAAGATTACAAAGCTATATATACAAGACAAG	AGCAAGAGAAAGCAAGATACAAGATTACAAAGCTATATATACAAGACAAG	AGCAAGAGAAAGCAAGATACAAGATTACAAAGCTATATATACAAGACAAG	AGCAAGAGAAAGCAAGATACAAGATTACAAAGCTATATATACAAGACAAG
139	ACGAGGACTCAACGTTTAACTAGCCACCGGATCTGTAGCCGGGGTGATAT	ACGAGGACTCAACGTTTAACTAGCCACCGGATCTGTAGCCGGGGTGAAAT	ACGAGGACTCAACGTTTAACTAGCCACCGGATCTGTAGCCGAGGTGAAAT	ACGAGGACTCAACGTTTAACTAGCCACCGGATCTGTATCCGAGGTGAAAT	ACGAGGACTCAACGATTAACTAGCCACCGGATCTGTATCCGAGGTGAAAT	ACGAGGACTCAACTATTAACTAGCCACCGGATCTGTATCCGAGGTGAAAT	AGGAGGACTCAACTATTAACTAGCCACCGGATCTGTATCCGAGGTGAAAT	AGAAGGACTCAACTATTAACTAGCCACCGGATCTGTATCCGAGGTGAAAT	AGAAGTACTCAACTATTAACTAGCCACCGGATCTGTATCCGAGGTGAAAT	AGAAGTACTCAACTATTAACTAGCCACCGGATCTGTATCCGAGGTTAAAT	AGAAGTACTCAACTATTAACTAGCCACCGGATCTGTATACGAGGTTAAAT	AGAAGTACTCAACTATTAACTAGCCACCGGATCTATATACGAGGTTAAAT	AGAAGTACTCAACTATTAACTAGCCACAGGATCTATATACGAGGTTAAAT	AGAAGTACTCAACTATTAACTAGCCACAAGATCTATATACGAGGTTAAAT	AGAAGTACTCAACTATTAACTAGCCACAAGATCTATATACAAGGTTAAAT	AGAAGTACTCAACTATTAACTAGCCACAAGATCTATATACAAGATTAAAT	AGAAGTACTCAACTATTAACTAGCTACAAGATCTATATACAAGATTAAAT	AGAAGTACTCAACTATAAACTAGCTACAAGATCTATATACAAGATTAAAT	AGAAGTACACAACTATAAACTAGCTACAAGATCTATATACAAGATTAAAT	AGAAGTACACAACTATAAACTAGCTACAAGATATATATACAAGATTAAAT	AGAAGTACACAACTATAAACTATCTACAAGATATATATACAAGATTAAAT	AGAAGTACACAACTATAAACTATATACAAGATATATATACAAGATTAAAT	AGAAGTACACAACTATAAACTATATACAAGATATATATACAAGATTAACT	AGAAGTACACAACTATAAACTATATACAAGATATATATACAAGATTTACT	AGAAGTACACAACTATAAACTATATACAAGATATATATACAAGAATTACT	AGAAGTACACTACTATAAACTATATACAAGATATATATACAAGAATTACT	AGAAGTACACTACTATAAACTATATACAAGCTATATATACAAGAATTACT	AGAAGTACACTACTATAAACTATATACAAACTATATATACAAGAATTACT	AGAAGTACACTACTATAAACTATATACAAACTATATATACAAGAATTACT	AGAAGTACACTACTATAAACTATATACAAACTATATATACAAGAATTACT	AGAAGTACACTACTATAAACTATATACAAACTATATATACAAGAATTACT	AGAAGTACACTACTATAAACTATATACAAACTATATATACAAGAATTACT	AGAAGTACACTACTATAAACTATATACAAACTATATATACAAGAATTACT	AGAAGTACACTACTATAAACTATATACAAACTATATATACAAGAATTACT	AGAAGTACACTACTATAAACTATATACAAACTATATATACAAGAATTACT	AGAAGTACACTACTATAAACTATATACAAACTATATATACAAGAATTACT	AGAAGTACACTACTATAAACTATATACAAACTATATATACAAGAATTACT	AGAAGTACACTACTATAAACTATATACAAACTATATATACAAGAATTACT	AGAAGTACACTACTATAAACTATATACAAACTATATATACAAGAATTACT	AGAAGTACACTACTATAAACTATATACAAACTATATATACAAGAATTACT	AGAAGTACACTACTATAAACTATATACAAACTATATATACAAGAATTACT
140	AGAGTAACACTAAAGCGGGTAAGCCACGGCTCGATTGGCCGGCGGGCATT	AGAGTAACACTAAAGCGGGTAAGCCACGACTCGATTGGCCGGCGGGCATT	AGAGTAACACTAAAGCGGGTAAGCCACGACTCGATTGGCCGGCAGGCATT	AGAGTAACACTAAAGCGGGTAAGCCAAGACTCGATTGGCCGGCAGGCATT	AGAGTAACACTAAAGCGGGTAAGCCAAGACTCGATTGGCCGGCAGGCATG	AGATTAACACTAAAGCGGGTAAGCCAAGACTCGATTGGCCGGCAGGCATG	AGATTAACACTAAAGCGAGTAAGCCAAGACTCGATTGGCCGGCAGGCATG	AGATTAACACTAAAGCGAGTATGCCAAGACTCGATTGGCCGGCAGGCATG	AGATTAACACTAAAGCGAGTATGCCAAGACTCGATAGGCCGGCAGGCATG	AGATTAACACTAAAGCGAGTATGTCAAGACTCGATAGGCCGGCAGGCATG	AGATTAACACTACAGCGAGTATGTCAAGACTCGATAGGCCGGCAGGCATG	AGATTAACACTACAGAGAGTATGTCAAGACTCGATAGGCCGGCAGGCATG	AGATTAACACTACAGAGAGTATGTCAAGACTCGATAGGCCGGCAGGCAAG	AGATTAACACTACAGAGAGTATGTCAAGACTCGATAGGCCGGCAAGCAAG	AGATTAACACTACAGAGAGTATGTCAAGACTCGATAGGCCAGCAAGCAAG	AGATTAACACTACAGAGAGTATGTCAAGACTCGATAAGCCAGCAAGCAAG	AGATTAACACTACAGAGAGTATGTCAAGACTCGATAAGACAGCAAGCAAG	AGATTAACACTACAGAGAGTATGTCAAGACTCGACAAGACAGCAAGCAAG	AGATTAACACTACAGAGAGTATGTCAAGACACGACAAGACAGCAAGCAAG	AGATTAACACTACAGAGAGTATGTCAAGACAAGACAAGACAGCAAGCAAG	AGATTAACACTACAGAGACTATGTCAAGACAAGACAAGACAGCAAGCAAG	AGATTAACACTACAGAGACAATGTCAAGACAAGACAAGACAGCAAGCAAG	AGATTAACACTACAGAGACAATGACAAGACAAGACAAGACAGCAAGCAAG	AGATTAACACTACAGAGACAATGACAAAACAAGACAAGACAGCAAGCAAG	AGATTAACACTACAGAAACAATGACAAAACAAGACAAGACAGCAAGCAAG	AGATTAACACTACAGAAACAATGACTAAACAAGACAAGACAGCAAGCAAG	AGATTAACACTACATAAACAATGACTAAACAAGACAAGACAGCAAGCAAG	AGATTAAAACTACATAAACAATGACTAAACAAGACAAGACAGCAAGCAAG	AGATTAAAACTATATAAACAATGACTAAACAAGACAAGACAGCAAGCAAG	AGATTATAACTATATAAACAATGACTAAACAAGACAAGACAGCAAGCAAG	AGATTATAACTATATAAACAATGACTAAACAAGACAAGACAGCAAGCAAG	AGATTATAACTATATAAACAATGACTAAACAAGACAAGACAGCAAGCAAG	AGATTATAACTATATAAACAATGACTAAACAAGACAAGACAGCAAGCAAG	AGATTATAACTATATAAACAATGACTAAACAAGACAAGACAGCAAGCAAG	AGATTATAACTATATAAACAATGACTAAACAAGACAAGACAGCAAGCAAG	AGATTATAACTATATAAACAATGACTAAACAAGACAAGACAGCAAGCAAG	AGATTATAACTATATAAACAATGACTAAACAAGACAAGACAGCAAGCAAG	AGATTATAACTATATAAACAATGACTAAACAAGACAAGACAGCAAGCAAG	AGATTATAACTATATAAACAATGACTAAACAAGACAAGACAGCAAGCAAG	AGATTATAACTATATAAACAATGACTAAACAAGACAAGACAGCAAGCAAG	AGATTATAACTATATAAACAATGACTAAACAAGACAAGACAGCAAGCAAG
141	TCCACCGCTTCTGGCCCAACCTCCTTTAAGGACAGCACCTGACCTTCCGC	TCCACCGCTTCTGGCCCAACCTCCTTTAAGGACAGCACCTGACCTTCAGC	TCCACCGCTTCTAGCCCAACCTCCTTTAAGGACAGCACCTGACCTTCAGC	TCCACCGCTTCTAGCCCAACCTACTTTAAGGACAGCACCTGACCTTCAGC	TCCACCGCTTCTAGCCCAACCTACTTTAAGGACAGCACCTGACCTACAGC	TCCACCGCTTCTAGCCCAACCTACTTTAAGTACAGCACCTGACCTACAGC	TCCACCGCTTCTAGCCCAACCTACTTTAAGTACAGAACCTGACCTACAGC	TCCACCGCTTCTAGCCCAACGTACTTTAAGTACAGAACCTGACCTACAGC	TCCACCGCTTCTAGACCAACGTACTTTAAGTACAGAACCTGACCTACAGC	TCCACCGCTTCAAGACCAACGTACTTTAAGTACAGAACCTGACCTACAGC	TCCACCGCTACAAGACCAACGTACTTTAAGTACAGAACCTGACCTACAGC	TCCACCGCTACAAGACAAACGTACTTTAAGTACAGAACCTGACCTACAGC	TCCAGCGCTACAAGACAAACGTACTTTAAGTACAGAACCTGACCTACAGC	TCCAGCGCTACAAGACAAACGTACTTTAACTACAGAACCTGACCTACAGC	TCCAGCGCTACAAGACAAACGTACTTTAACTACAAAACCTGACCTACAGC	TCCAGCGCTACAAGACAAACGTACTTTAACTACAAAAACTGACCTACAGC	TCCAGCGCTACAAGACAAACGTACTTTAACTACAAAAACTGATCTACAGC	TCCAGCGCTACAAGACAAACGTACTTTAACTACAAAGACTGATCTACAGC	TCCAGCGCTACAAGACAAACGTACTTTAACTACAAAGACTGATTTACAGC	TCCAGCCCTACAAGACAAACGTACTTTAACTACAAAGACTGATTTACAGC	TCCAGCCCTACAAGACAAACGTACTTTAACTACAAAGACTGATTTACAGA	TCCAGCCCTACAAGAAAAACGTACTTTAACTACAAAGACTGATTTACAGA	TCCAGCCCTACAAGAAAAACGTATTTTAACTACAAAGACTGATTTACAGA	TCCAGCCCTACAAGAAAAACGTATTTTAACTACAAAGACAGATTTACAGA	TCCAGCCCTACAAGAAAAACGTATTTTAACTACAAAGACAGATTTACAAA	TCCAGCCCTACAAGAAAAACGTATTTTAACTACAAAGACAGATTTACAAG	TCCAGTCCTACAAGAAAAACGTATTTTAACTACAAAGACAGATTTACAAG	TACAGTCCTACAAGAAAAACGTATTTTAACTACAAAGACAGATTTACAAG	TAAAGTCCTACAAGAAAAACGTATTTTAACTACAAAGACAGATTTACAAG	AAAAGTCCTACAAGAAAAACGTATTTTAACTACAAAGACAGATTTACAAG	AAAAGTCCTACAAGAAAAACGTATTTAAACTACAAAGACAGATTTACAAG	AAAAGTCCTACAAAAAAAACGTATTTAAACTACAAAGACAGATTTACAAG	AAAAGTCCTACAAATAAAACGTATTTAAACTACAAAGACAGATTTACAAG	AAAAGTCCTACAAATAAAACGTATATAAACTACAAAGACAGATTTACAAG	AAAAGTCCTACAAATAAAAAGTATATAAACTACAAAGACAGATTTACAAG	AAAAGTCCTACAAATAAAAACTATATAAACTACAAAGACAGATTTACAAG	AAAAGTCCTACAAATACAAACTATATAAACTACAAAGACAGATTTACAAG	AAAAGTCCTACAAATACAAACTATATAAACTACAAAGACATATTTACAAG	AAAAGTCCTACAAATACAAACTATATAAACTACAAAGACATATATACAAG	AAAAGTCCTACAAATACAAACTATATAAACTACAAAGATATATATACAAG	AAAAGTCCTACAAATACAAACTATATAAACTACAAATATATATATACAAG
142	TAACCATGACAACCGCACGTAGGGACGTTACCTTGCCGAGTATCACGTAC	TAACCATGACAACCGCACGTATGGACGTTACCTTGCCGAGTATCACGTAC	TAACCATGACAACCGCAAGTATGGACGTTACCTTGCCGAGTATCACGTAC	TAACCATGACAACAGCAAGTATGGACGTTACCTTGCCGAGTATCACGTAC	TAACCATGACAACAGCAAGTATGGACGTTACCTTGCCGAGTATCACGAAC	TAACCATGACAACAGCAAGTATGGACGTTACATTGCCGAGTATCACGAAC	TGACCATGACAACAGCAAGTATGGACGTTACATTGCCGAGTATCACGAAC	TGACCATGACAACAGCAAGTATGGACGTTACATTGCCGAGTATCAAGAAC	TGACCATGACAACAGCAAGTATGGACGTTACATTGACGAGTATCAAGAAC	TGACCATGACAACAGCAAGTATGGACGTTACATTGACGAGTATCAAGAAG	AGACCATGACAACAGCAAGTATGGACGTTACATTGACGAGTATCAAGAAG	AGACAATGACAACAGCAAGTATGGACGTTACATTGACGAGTATCAAGAAG	AGACAAAGACAACAGCAAGTATGGACGTTACATTGACGAGTATCAAGAAG	AGACAAAGACAACAGCAAGTATGGACGTTACATTTACGAGTATCAAGAAG	AGACAAAGACAACAGCAAGTATGGACGTTACATTTACAAGTATCAAGAAG	AGACAAAGACAACAGCAAGTATGGACGTTACATTTACAAGAATCAAGAAG	AGACAAAGACAACAGCAAGTATGGACGTTACAGTTACAAGAATCAAGAAG	AGACAAAGACAACAGCAAGTATGGACGTTACAGATACAAGAATCAAGAAG	AGACAAAGACTACAGCAAGTATGGACGTTACAGATACAAGAATCAAGAAG	AGACAAAGACTACAGAAAGTATGGACGTTACAGATACAAGAATCAAGAAG	AGACAAAGACTACAGAAACTATGGACGTTACAGATACAAGAATCAAGAAG	AGACAAAGACTACAGAAACTATGGACGTTACAGATACAAGAATCAAGATG	AGACAAAGACTACATAAACTATGGACGTTACAGATACAAGAATCAAGATG	AGACAAAGACTACATAAACGATGGACGTTACAGATACAAGAATCAAGATG	AGAAAAAGACTACATAAACGATGGACGTTACAGATACAAGAATCAAGATG	AGAAACAGACTACATAAACGATGGACGTTACAGATACAAGAATCAAGATG	AGAAACAGACTACATAAACGATGGACGTTACAGATACAAGATTCAAGATG	AGAAACAGACTACATAAACGATGGACGTTTCAGATACAAGATTCAAGATG	AGAAACAGACTACATAAACGATGGACGTTTCAGATACAAGATTCAAGATG	AGAAACAGACTACATAAACGATGGACGTTTCAGATACAAGATTCAAGATG	AGAAACAGACTACATAAACGATGGACGTTTCAGATACAAGATTCAAGATG	AGAAACAGACTACATAAACGATGGACGTTTCAGATACAAGATTCAAGATG	AGAAACAGACTACATAAACGATGGACGTTTCAGATACAAGATTCAAGATG	AGAAACAGACTACATAAACGATGGACGTTTCAGATACAAGATTCAAGATG	AGAAACAGACTACATAAACGATGGACGTTTCAGATACAAGATTCAAGATG	AGAAACAGACTACATAAACGATGGACGTTTCAGATACAAGATTCAAGATG	AGAAACAGACTACATAAACGATGGACGTTTCAGATACAAGATTCAAGATG	AGAAACAGACTACATAAACGATGGACGTTTCAGATACAAGATTCAAGATG	AGAAACAGACTACATAAACGATGGACGTTTCAGATACAAGATTCAAGATG	AGAAACAGACTACATAAACGATGGACGTTTCAGATACAAGATTCAAGATG	AGAAACAGACTACATAAACGATGGACGTTTCAGATACAAGATTCAAGATG
143	GAGAGACAGAAGCATCACGTAACTTGGCCGCTCGTACGAACCCCGCGAAA	GAGAGACAGAAGCATCAAGTAACTTGGCCGCTCGTACGAACCCCGCGAAA	GAGAGACAGAAGCATCAAGTAACTTGACCGCTCGTACGAACCCCGCGAAA	GAGAGACAGAAGCATCAAGAAACTTGACCGCTCGTACGAACCCCGCGAAA	GAGAGACAGAAGCATCAAGAAACTAGACCGCTCGTACGAACCCCGCGAAA	GAGAGACAGAAGCATCAAGAAACAAGACCGCTCGTACGAACCCCGCGAAA	GAGAGACAGAAGCATCAAGAAACAAGACCGCTCGTACGAACCCCGCGAAG	GAGAGACAGAAGCATCAAGAAACAAGACCGCTCGTACGAACCCCGCCAAG	GAGAGACAGAAGCATCAAGAAACAAGACAGCTCGTACGAACCCCGCCAAG	AAGAGACAGAAGCATCAAGAAACAAGACAGCTCGTACGAACCCCGCCAAG	AAGAGACAGAAGCATCAAGAAACAAGACAGCTCGTACGAATCCCGCCAAG	AAGAGACAGAAGCATCAAGAAACAAGACAGCTCCTACGAATCCCGCCAAG	AAGAGACAGAAGCATCAAGAAACAAGACAGCTACTACGAATCCCGCCAAG	AAGAGACAGAAGCATCAAGAAACAAGACAGCTACTACGAATCCAGCCAAG	AAGAGACAGAAGCATCAAGAAACAAGACAGCTACTACAAATCCAGCCAAG	AAGAGACAGAAGCATCAAGAAACAAGACAGCTACTACAAATCAAGCCAAG	AAGAGACAGAAGCATCAAGAAACAAGACAGCTACTACAAATCAAGACAAG	AAGACACAGAAGCATCAAGAAACAAGACAGCTACTACAAATCAAGACAAG	AAGACACAGAAGAATCAAGAAACAAGACAGCTACTACAAATCAAGACAAG	AAGACACACAAGAATCAAGAAACAAGACAGCTACTACAAATCAAGACAAG	AAGACATACAAGAATCAAGAAACAAGACAGCTACTACAAATCAAGACAAG	AAGACATACAAGAATCAAGAAACAAGACAGCTACTACAAAGCAAGACAAG	AAGACATACAAGAATCAAGAAACAAGACAACTACTACAAAGCAAGACAAG	AAGACATACAAGAATCAAGAAACAAGACTACTACTACAAAGCAAGACAAG	AAGACATACAAGAATCAAGAAACAAGATTACTACTACAAAGCAAGACAAG	AAGACATACAAGAATCAAGAATCAAGATTACTACTACAAAGCAAGACAAG	AAGACCTACAAGAATCAAGAATCAAGATTACTACTACAAAGCAAGACAAG	AAGTCCTACAAGAATCAAGAATCAAGATTACTACTACAAAGCAAGACAAG	AAGTCCTACAAGAAACAAGAATCAAGATTACTACTACAAAGCAAGACAAG	AAGTCCTACAAGAAACAAGAATCAAGATTACTACTACAAAGCAAGACAAG	AAGTCCTACAAGAAACAAGAATCAAGATTACTACTACAAAGCAAGACAAG	AAGTCCTACAAGAAACAAGAATCAAGATTACTACTACAAAGCAAGACAAG	AAGTCCTACAAGAAACAAGAATCAAGATTACTACTACAAAGCAAGACAAG	AAGTCCTACAAGAAACAAGAATCAAGATTACTACTACAAAGCAAGACAAG	AAGTCCTACAAGAAACAAGAATCAAGATTACTACTACAAAGCAAGACAAG	AAGTCCTACAAGAAACAAGAATCAAGATTACTACTACAAAGCAAGACAAG	AAGTCCTACAAGAAACAAGAATCAAGATTACTACTACAAAGCAAGACAAG	AAGTCCTACAAGAAACAAGAATCAAGATTACTACTACAAAGCAAGACAAG	AAGTCCTACAAGAAACAAGAATCAAGATTACTACTACAAAGCAAGACAAG	AAGTCCTACAAGAAACAAGAATCAAGATTACTACTACAAAGCAAGACAAG	AAGTCCTACAAGAAACAAGAATCAAGATTACTACTACAAAGCAAGACAAG
144	GGCTTAAGGTTTTAGGCGTGCCATGTTGTGCTGCACGTATACAAAGGATG	GGCTTAAGGTTTTAGGCGTGCCATTTTGTGCTGCACGTATACAAAGGATG	GGCTTAAGGTTTTAGGCATGCCATTTTGTGCTGCACGTATACAAAGGATG	GGCTTAAGGTTTTAGGCATGACATTTTGTGCTGCACGTATACAAAGGATG	GGCTTAAGGTTTTAGGCATGACATTTTGTGCTGCAAGTATACAAAGGATG	GGCTTAAGGTTTTAAGCATGACATTTTGTGCTGCAAGTATACAAAGGATG	GGCTTAAGGTTTTAAGCATGACATTTTGTGCTGCAAGTATACAAAAGATG	GGCTTAAGGTTTTAAGCATGACTTTTTGTGCTGCAAGTATACAAAAGATG	GGCTTAAGGTTTTAAGCATGACTTTTTGTGCTGCAAGTATACACAAGATG	GGCTTAAGGTTTTAAGCATGACTTTTTGTGCTGCAAGTATATACAAGATG	GGCTTAAGGTTTTAAGCATGACTTTTTGTGCTACAAGTATATACAAGATG	GGCTTAAGGTTTTAAGCATGACTTTTTGTGCTACAAGTAGATACAAGATG	GGCTTAAGGTTTTAAGCAAGACTTTTTGTGCTACAAGTAGATACAAGATG	GGCTTAAGGTTTTAAGCAAGACTTATTGTGCTACAAGTAGATACAAGATG	GGCTTAAGGTTTTAAGCAAGACTTATTGTACTACAAGTAGATACAAGATG	GGCTTAAGGTTTTAAGCAAGACTTATTTTACTACAAGTAGATACAAGATG	GGCTTAAGGTTTTAAGCAAGAATTATTTTACTACAAGTAGATACAAGATG	GGCTTAAGGTTATAAGCAAGAATTATTTTACTACAAGTAGATACAAGATG	GGTTTAAGGTTATAAGCAAGAATTATTTTACTACAAGTAGATACAAGATG	AGTTTAAGGTTATAAGCAAGAATTATTTTACTACAAGTAGATACAAGATG	AGATTAAGGTTATAAGCAAGAATTATTTTACTACAAGTAGATACAAGATG	AGATTAAGGTTACAAGCAAGAATTATTTTACTACAAGTAGATACAAGATG	AGATTAAGTTTACAAGCAAGAATTATTTTACTACAAGTAGATACAAGATG	AGATTAATTTTACAAGCAAGAATTATTTTACTACAAGTAGATACAAGATG	AGATTAATTTTACAAGCAAGAATTATTTTACTACAAGTATATACAAGATG	AGATTAATTTTACAAGCAAGAATTATTTTACTACAAGTATATACAAGAAG	AGATTAATTTTACAAGCAAGAATTATTTTACTACAAGTATATACAAGAAT	AGATTAATTTTACAAGCAAGAATTATTTTACTACAAGTATATACAAGAAT	AGATTAATTTTACAAGCAAGAATTATTTTACTACAAGTATATACAAGAAT	AGATTAATTTTACAAGCAAGAATTATTTTACTACAAGTATATACAAGAAT	AGATTAATTTTACAAGCAAGAATTATTTTACTACAAGTATATACAAGAAT	AGATTAATTTTACAAGCAAGAATTATTTTACTACAAGTATATACAAGAAT	AGATTAATTTTACAAGCAAGAATTATTTTACTACAAGTATATACAAGAAT	AGATTAATTTTACAAGCAAGAATTATTTTACTACAAGTATATACAAGAAT	AGATTAATTTTACAAGCAAGAATTATTTTACTACAAGTATATACAAGAAT	AGATTAATTTTACAAGCAAGAATTATTTTACTACAAGTATATACAAGAAT	AGATTAATTTTACAAGCAAGAATTATTTTACTACAAGTATATACAAGAAT	AGATTAATTTTACAAGCAAGAATTATTTTACTACAAGTATATACAAGAAT	AGATTAATTTTACAAGCAAGAATTATTTTACTACAAGTATATACAAGAAT	AGATTAATTTTACAAGCAAGAATTATTTTACTACAAGTATATACAAGAAT	AGATTAATTTTACAAGCAAGAATTATTTTACTACAAGTATATACAAGAAT
145	TGGCGAGCCAGTCGTCCCAAGACACACTATAACATCGTCATTACCGGTTA	TAGCGAGCCAGTCGTCCCAAGACACACTATAACATCGTCATTACCGGTTA	TAGCGAGCCAGTCGTCCCAAGACACACTATAACATCGTCATTACCGGATA	TAGCGAGCCAGTCGTCCCAAGACACACTATAAGATCGTCATTACCGGATA	TAGCGAGCCAGTCGTCACAAGACACACTATAAGATCGTCATTACCGGATA	TAGCAAGCCAGTCGTCACAAGACACACTATAAGATCGTCATTACCGGATA	TAGCAAGACAGTCGTCACAAGACACACTATAAGATCGTCATTACCGGATA	TAGCAAGACAGTCATCACAAGACACACTATAAGATCGTCATTACCGGATA	TACCAAGACAGTCATCACAAGACACACTATAAGATCGTCATTACCGGATA	TACCAAGACAGTCATCACAAGACACACTATAAGATCGTCATTACAGGATA	TACCAAGACAGTCATCACAAGACACACTATAAGATCGTCATTACAAGATA	TACCAAGACAGTCATCACAAGACACACTATAAGATCGTCATTACAAGATG	TACCAAGACAGTCATCACAAGACAAACTATAAGATCGTCATTACAAGATG	TACCAAGACAGTCATCACAAGACAAACTATAAGATCGTCAATACAAGATG	TACCAAGACAGTCATCACAAGACAAACTATAAGATCGTCAAGACAAGATG	TACCAAGACAGTCATCACAAGACAAACTATAAGATCGTCAAGACAAAATG	TACCAAGACAGTCATTACAAGACAAACTATAAGATCGTCAAGACAAAATG	TACCAAGACAGTCATTACAAGACAAACTATAAGAACGTCAAGACAAAATG	TACCAAGACAGTCATTACAAGACAAACTATAAGAACGACAAGACAAAATG	TACCAAGACAGTCATTACAAGACAAACTATAAGAACTACAAGACAAAATG	TACCAAGACAGTCAATACAAGACAAACTATAAGAACTACAAGACAAAATG	TACAAAGACAGTCAATACAAGACAAACTATAAGAACTACAAGACAAAATG	TACAAAGACAGTCAAGACAAGACAAACTATAAGAACTACAAGACAAAATG	TACAAAGACAGACAAGACAAGACAAACTATAAGAACTACAAGACAAAATG	TACAAAGACAGACAAGACAAGACAAACTACAAGAACTACAAGACAAAATG	TACAAAGACAGACAAGACAAGACAAACTACAAAAACTACAAGACAAAATG	TACAAAGACAGACAAGACAAGACAAACTACAAAAACTACAAGACAAGATG	TACAAAGACAGACAAGACAAGACAAACTACAAAAACTACAAGACAAGAAG	TACAAAGACATACAAGACAAGACAAACTACAAAAACTACAAGACAAGAAG	TACAAAGTCATACAAGACAAGACAAACTACAAAAACTACAAGACAAGAAG	TACAAAGTTATACAAGACAAGACAAACTACAAAAACTACAAGACAAGAAG	TACAAAGCTATACAAGACAAGACAAACTACAAAAACTACAAGACAAGAAG	TACAAAGCTATACAAGACAAGACAAACTACAAAAACTACAAGACAAGAAG	TACAAAGCTATACAAGACAAGACAAACTACAAAAACTACAAGACAAGAAG	TACAAAGCTATACAAGACAAGACAAACTACAAAAACTACAAGACAAGAAG	TACAAAGCTATACAAGACAAGACAAACTACAAAAACTACAAGACAAGAAG	TACAAAGCTATACAAGACAAGACAAACTACAAAAACTACAAGACAAGAAG	TACAAAGCTATACAAGACAAGACAAACTACAAAAACTACAAGACAAGAAG	TACAAAGCTATACAAGACAAGACAAACTACAAAAACTACAAGACAAGAAG	TACAAAGCTATACAAGACAAGACAAACTACAAAAACTACAAGACAAGAAG	TACAAAGCTATACAAGACAAGACAAACTACAAAAACTACAAGACAAGAAG
146	GCAGGCTTCTACACTGCAATGGATGGGCGAGGCCCGAAGACCTCACGTAT	GCATGCTTCTACACTGCAATGGATGGGCGAGGCCCGAAGACCTCACGTAT	GCATGCTTCTACACTGCATTGGATGGGCGAGGCCCGAAGACCTCACGTAT	GCATGCTTCTACACTGCATTGGATGGGCGATGCCCGAAGACCTCACGTAT	GCATGATTCTACACTGCATTGGATGGGCGATGCCCGAAGACCTCACGTAT	GCATGATTCTACACTGCATTGGATGGGCGATGCCCGAAGACCTCACGAAT	TCATGATTCTACACTGCATTGGATGGGCGATGCCCGAAGACCTCACGAAT	TCATGATTCTACACTGCATTGGATTGGCGATGCCCGAAGACCTCACGAAT	TCATGATTCTACACTGCATTGGAATGGCGATGCCCGAAGACCTCACGAAT	TCATGATTCTACACTGCATTGGAATGGCGATGCCTGAAGACCTCACGAAT	TCAAGATTCTACACTGCATTGGAATGGCGATGCCTGAAGACCTCACGAAT	TCAAGATTCTACACTGCATTGGAATGGCGATGCCTGAAGACCTCAAGAAT	TCAAGATTCTACACTGCATTGGAATGGCGATGCCTGAAGACCTCAAGATT	TCAAGATTCTACACTGAATTGGAATGGCGATGCCTGAAGACCTCAAGATT	TAAAGATTCTACACTGAATTGGAATGGCGATGCCTGAAGACCTCAAGATT	TACAGATTCTACACTGAATTGGAATGGCGATGCCTGAAGACCTCAAGATT	TACAAATTCTACACTGAATTGGAATGGCGATGCCTGAAGACCTCAAGATT	TACAAATTCTACACTGAATTGGAATGGAGATGCCTGAAGACCTCAAGATT	TACAAATTCTACATTGAATTGGAATGGAGATGCCTGAAGACCTCAAGATT	TACAAATTCTACATTGAATTAGAATGGAGATGCCTGAAGACCTCAAGATT	TACAAATTCTACATTGAATTACAATGGAGATGCCTGAAGACCTCAAGATT	TACAAATTCTACATTGAATTACAATGAAGATGCCTGAAGACCTCAAGATT	TACAAATTTTACATTGAATTACAATGAAGATGCCTGAAGACCTCAAGATT	TACAAATTTTACATTGAATTACAATGAAGATGGCTGAAGACCTCAAGATT	TACAAATTTTACATTGAATTACAATGAAGATGGCTGAAGACGTCAAGATT	TACAAATTTTACATTGAATTACAATGAAGATGGCTGAAGAAGTCAAGATT	TACAAATTTTACATTGAATTACAATGAAGATGACTGAAGAAGTCAAGATT	TACAAATTTTACATTGAATTACAATGAAGATGACTAAAGAAGTCAAGATT	TACAAATTTTACATTGAATTACAATGAAGATGACTACAGAAGTCAAGATT	TACAAATTTTACATTGAATTACAATGAAGATGACTACAGAAGTCAAGATG	TACAAATTTTACATTGAATTACAATGAAGATGACTACAAAAGTCAAGATG	TACAAATTTTACATTGAATTACAATGAAGATTACTACAAAAGTCAAGATG	TACAAATTTTACATTGAATTACAAAGAAGATTACTACAAAAGTCAAGATG	TACAAATTTTACATTAAATTACAAAGAAGATTACTACAAAAGTCAAGATG	TACAAATTTTACATTAAATTACAAAGAAAATTACTACAAAAGTCAAGATG	TACAAATTTTACATTAAATTACAAAGAAAATTACTACAAAAGACAAGATG	TACAAATTTTACATTAAATTACAAAGAAAATTACTACAAAAGACAAGATG	TACAAATTTTACATTAAATTACAAAGAAAATTACTACAAAAGACAAGATG	TACAAATTTTACATTAAATTACAAAGAAAATTACTACAAAAGACAAGATG	TACAAATTTTACATTAAATTACAAAGAAAATTACTACAAAAGACAAGATG	TACAAATTTTACATTAAATTACAAAGAAAATTACTACAAAAGACAAGATG
147	TAAGGCCAGCCAACCCAAGCAACTAACTCGACGGTTTTCGCGCTGAACCT	TAAGGCCAGCCAACCCAAGCAACTAACTCGACGGTTTTCGCGCTGAAACT	TAAGGCCAGCCAACCCAAGCAACTAACTCGACGGTTTTCGCCCTGAAACT	AAAGGCCAGCCAACCCAAGCAACTAACTCGACGGTTTTCGCCCTGAAACT	AAAGGCCAGCCAACCCAAGAAACTAACTCGACGGTTTTCGCCCTGAAACT	AAAGGCCAGCAAACCCAAGAAACTAACTCGACGGTTTTCGCCCTGAAACT	AAAGGCCAGCAAACACAAGAAACTAACTCGACGGTTTTCGCCCTGAAACT	AAAGGCCAGCAAATACAAGAAACTAACTCGACGGTTTTCGCCCTGAAACT	AAAGGCCAGCAAATACAAGAAACTAACTCGACGGTTTTAGCCCTGAAACT	AAAGGCCAGCAAATACAAGAAACTAACTCGACGATTTTAGCCCTGAAACT	AAAGGCCAGCAAATACAAGAAACTAAATCGACGATTTTAGCCCTGAAACT	AAAGGCCAGCAAATACAAGAAACTACATCGACGATTTTAGCCCTGAAACT	AAAGGCCAGCAAATACAAGAAACTACATAGACGATTTTAGCCCTGAAACT	AAAGGCCAGCAAATACAAGAAACTACAAAGACGATTTTAGCCCTGAAACT	AAAGGCCAGCAAATACAAGAAACTACAAAGACGATTTTAGCACTGAAACT	AAAGGCCAGCAAATACAAGAAACTACAAAGACGATTTTAGCACAGAAACT	AAAGGCCAGCAAATACAAGAAACTACAAAGACGATTTTAGCAAAGAAACT	AAAGGCAAGCAAATACAAGAAACTACAAAGACGATTTTAGCAAAGAAACT	AAAGGCAAGAAAATACAAGAAACTACAAAGACGATTTTAGCAAAGAAACT	AAAGGCAAGAAACTACAAGAAACTACAAAGACGATTTTAGCAAAGAAACT	AAAGACAAGAAACTACAAGAAACTACAAAGACGATTTTAGCAAAGAAACT	AGAGACAAGAAACTACAAGAAACTACAAAGACGATTTTAGCAAAGAAACT	AGAGACAAGAAACTACAAGAAACTACAAAGACTATTTTAGCAAAGAAACT	AGAGACAAGAAACTACAAGAAACTACAAAGACTATTTAAGCAAAGAAACT	AGAGACAAGAAACTACAAGAAACTACAAAGACTATATAAGCAAAGAAACT	AGAGACAAGAAACTACAAGAAACTACAAAGATTATATAAGCAAAGAAACT	AGAGACAAGAAACTACAAGAAACTACAAAGATTATATAAACAAAGAAACT	AGAGACAAGAAACTACAAGAAACTACAAAGATTATATAAACTAAGAAACT	AGAGACAAGAAACTACAAGAAACTACAAAGATTATATAAACTAAGACACT	AGAGACAAGAAACTACAAGAAACTACAAAGATTATATAAACTAAGACACG	AGAGACAAGAAACTACAAGAAACTACAAAGATTATATAAACTAAGACAAG	AGAAACAAGAAACTACAAGAAACTACAAAGATTATATAAACTAAGACAAG	AGAAACAAGAAACTACAAGAAACTACAAAGATTATATAAACTAAGACAAG	AGAAACAAGAAACTACAAGAAACTACAAAGATTATATAAACTAAGACAAG	AGAAACAAGAAACTACAAGAAACTACAAAGATTATATAAACTAAGACAAG	AGAAACAAGAAACTACAAGAAACTACAAAGATTATATAAACTAAGACAAG	AGAAACAAGAAACTACAAGAAACTACAAAGATTATATAAACTAAGACAAG	AGAAACAAGAAACTACAAGAAACTACAAAGATTATATAAACTAAGACAAG	AGAAACAAGAAACTACAAGAAACTACAAAGATTATATAAACTAAGACAAG	AGAAACAAGAAACTACAAGAAACTACAAAGATTATATAAACTAAGACAAG	AGAAACAAGAAACTACAAGAAACTACAAAGATTATATAAACTAAGACAAG
148	TGTCCAATCTGCTACCTTGAAGTCCCTGTCTTCGGTAAGGTCCATTGAAT	AGTCCAATCTGCTACCTTGAAGTCCCTGTCTTCGGTAAGGTCCATTGAAT	AGTCCAATCTACTACCTTGAAGTCCCTGTCTTCGGTAAGGTCCATTGAAT	AGTCCAATCTACTACATTGAAGTCCCTGTCTTCGGTAAGGTCCATTGAAT	AGTCCAATCTACTACATTGAAGTCCCTGTCTTCGTTAAGGTCCATTGAAT	AGTCCAATCTACTACATTGAAGTCCCTGTATTCGTTAAGGTCCATTGAAT	AGTCCAATCTACTACATAGAAGTCCCTGTATTCGTTAAGGTCCATTGAAT	AGTCAAATCTACTACATAGAAGTCCCTGTATTCGTTAAGGTCCATTGAAT	AGACAAATCTACTACATAGAAGTCCCTGTATTCGTTAAGGTCCATTGAAT	AGACAAATCTACTACATAGAAGTCCCTGTATTCGTTAAGGTCCATTGAAG	AGACAAATCTACTACATAGAAGTCCCTGTATTCGTTAAGATCCATTGAAG	AGACAAATCTACTACATAGAAGTCCCTGTATACGTTAAGATCCATTGAAG	AGACAAATCTACTACATAGAAGTCCCTATATACGTTAAGATCCATTGAAG	AGACAAATCTACTACATAGAAGTCCCTATATAAGTTAAGATCCATTGAAG	AGACAAATCTACTACATAGAAGTCCCTATATAAGTTAAGATCCATTCAAG	AGACAAATCTACTACATAGAAGTCCCTATATAAGTTAAGATCCATACAAG	AGACAAATCTACTACATAGAAGTCCCTATATAAGTTAAGATACATACAAG	AGACAAATCTACTACATAGAAGTCCCTATATAAATTAAGATACATACAAG	AGACAAATCTACTACATAGAAGTCACTATATAAATTAAGATACATACAAG	AGACAAATCTACTACATAGAAGACACTATATAAATTAAGATACATACAAG	AGACAAATCTACTACATACAAGACACTATATAAATTAAGATACATACAAG	AGACAAATCTACTACATACAAGACACTATATAAATTAAGATATATACAAG	AGACAAATCTACTACATACAAGAAACTATATAAATTAAGATATATACAAG	AGACAAATCTACTACATACAAGAAACTATATAAATCAAGATATATACAAG	AGACAAGTCTACTACATACAAGAAACTATATAAATCAAGATATATACAAG	AGACAAGACTACTACATACAAGAAACTATATAAATCAAGATATATACAAG	AGACAAGACAACTACATACAAGAAACTATATAAATCAAGATATATACAAG	AGACAAGACAACTATATACAAGAAACTATATAAATCAAGATATATACAAG	AGACAAGACAAGTATATACAAGAAACTATATAAATCAAGATATATACAAG	AGACAAGACAAGTATATACAAGAAACTATATAAATCAAGATATATACAAG	AGACAAGACAAGTATATACAAGAAACTATATAAATCAAGATATATACAAG	AGACAAGACAAGTATATACAAGAAACTATATAAATCAAGATATATACAAG	AGACAAGACAAGTATATACAAGAAACTATATAAATCAAGATATATACAAG	AGACAAGACAAGTATATACAAGAAACTATATAAATCAAGATATATACAAG	AGACAAGACAAGTATATACAAGAAACTATATAAATCAAGATATATACAAG	AGACAAGACAAGTATATACAAGAAACTATATAAATCAAGATATATACAAG	AGACAAGACAAGTATATACAAGAAACTATATAAATCAAGATATATACAAG	AGACAAGACAAGTATATACAAGAAACTATATAAATCAAGATATATACAAG	AGACAAGACAAGTATATACAAGAAACTATATAAATCAAGATATATACAAG	AGACAAGACAAGTATATACAAGAAACTATATAAATCAAGATATATACAAG	AGACAAGACAAGTATATACAAGAAACTATATAAATCAAGATATATACAAG
149	CAAACTAAGCCCTACTGCGTTAACATCCTTTCCTACGGTGCCCTTAATAC	CAAACTAAGCCCTACTGCGTTAACATCCTTTCCTACGGTGCCCTTAAAAC	CAAACTAAGCCCTACTACGTTAACATCCTTTCCTACGGTGCCCTTAAAAC	CAAACTAAGACCTACTACGTTAACATCCTTTCCTACGGTGCCCTTAAAAC	CAAACTAAGACCTACTACGTTAAGATCCTTTCCTACGGTGCCCTTAAAAC	CAAACTAAGACCTACTACGATAAGATCCTTTCCTACGGTGCCCTTAAAAC	CAAACTAAGACCTACTACGATAAGATACTTTCCTACGGTGCCCTTAAAAC	CAAACTAAGACCTACTACGATAAGATACTTACCTACGGTGCCCTTAAAAC	CAAACTAAGACCTACTACGATAAGATACTTACCTACAGTGCCCTTAAAAC	CAAACTAAGACCTACTACGATAAGATACTTACCTACAGAGCCCTTAAAAC	CAAACTAAGACCTACTACGATAAGATACTTAACTACAGAGCCCTTAAAAC	CAAACTAAGACCTACTACGATAAGATACTTAACTACAAAGCCCTTAAAAC	CAAACTAAGACCTACTACGATAAGATACTTAACTACAAAGCCATTAAAAC	CAAACTAAGACCTACTACGATAAGATACTTAACTACAAAGCCATTACAAC	CAAACTAAGACCTACTACGATAAGATACTTAACTACAAAGCCATTACAAG	CAAACTAAGACCTACTACGATAAGATACTTAACTACAAAGACATTACAAG	GAAACTAAGACCTACTACGATAAGATACTTAACTACAAAGACATTACAAG	GATACTAAGACCTACTACGATAAGATACTTAACTACAAAGACATTACAAG	GATACAAAGACCTACTACGATAAGATACTTAACTACAAAGACATTACAAG	GATACAAAGACCTACTACGATAAGATACTTAACTACAAAGACAATACAAG	GATACAAAGACCTACTACGATAAGATACTTAACTACAAAGACTATACAAG	GTTACAAAGACCTACTACGATAAGATACTTAACTACAAAGACTATACAAG	GTTACAAAGACCTACTACGATAAGATATTTAACTACAAAGACTATACAAG	GTTACAAAGACCTACTACGATAAGATATATAACTACAAAGACTATACAAG	GTTACAAAGACCTACTACGATAAGATATATAACTACAAAGATTATACAAG	GTTACAAAGACATACTACGATAAGATATATAACTACAAAGATTATACAAG	GTTACAAAGACATACTACGATAAGATATATATCTACAAAGATTATACAAG	GTTACAAAGACATACTACGATAAGATATATATTTACAAAGATTATACAAG	GTTACAAAGACATACTACGATAAGATATATATTTACAAAGATTATACAAG	GTTACAAAGACATACTACGATAAGATATATATTTACAAAGATTATACAAG	GTTACAAAGACATACTACGATAAGATATATATTTACAAAGATTATACAAG	GTTACAAAGACATACTACGATAAGATATATATTTACAAAGATTATACAAG	GTTACAAAGACATACTACGATAAGATATATATTTACAAAGATTATACAAG	GTTACAAAGACATACTACGATAAGATATATATTTACAAAGATTATACAAG	GTTACAAAGACATACTACGATAAGATATATATTTACAAAGATTATACAAG	GTTACAAAGACATACTACGATAAGATATATATTTACAAAGATTATACAAG	GTTACAAAGACATACTACGATAAGATATATATTTACAAAGATTATACAAG	GTTACAAAGACATACTACGATAAGATATATATTTACAAAGATTATACAAG	GTTACAAAGACATACTACGATAAGATATATATTTACAAAGATTATACAAG	GTTACAAAGACATACTACGATAAGATATATATTTACAAAGATTATACAAG	GTTACAAAGACATACTACGATAAGATATATATTTACAAAGATTATACAAG
150	ATTTATCTCTAAGTGCATCTCCCTTACGGCAAGTCTGGTACATACTCTAC	ATTTATCTCTAAGTGCATCTCCCTTACGGCAAGTCTGGTACATAATCTAC	ATTTATCTCTAAGTGCATCTCCCTTACGGCAAGTCTGATACATAATCTAC	ATTTATCTCTAAGTGCATCTCCCTTACAGCAAGTCTGATACATAATCTAC	ATTTATCTCTAAGTGCATCTCCCTTACAGCAAGTCAGATACATAATCTAC	ATTTATCTCTAAGTGCATCTCCCTTACAGCAAGTAAGATACATAATCTAC	ATTTATCTCTAAGTGCATCTCCCTTACAGCAAGTAAGATACAAAATCTAC	ATTTATCTCTAAGTGCATCTCCCTTACAGCAAGCAAGATACAAAATCTAC	AGTTATCTCTAAGTGCATCTCCCTTACAGCAAGCAAGATACAAAATCTAC	AGATATCTCTAAGTGCATCTCCCTTACAGCAAGCAAGATACAAAATCTAC	AGATATATCTAAGTGCATCTCCCTTACAGCAAGCAAGATACAAAATCTAC	AGATATAACTAAGTGCATCTCCCTTACAGCAAGCAAGATACAAAATCTAC	AGATTTAACTAAGTGCATCTCCCTTACAGCAAGCAAGATACAAAATCTAC	AGATTTAACTAAGTGCATCTCACTTACAGCAAGCAAGATACAAAATCTAC	AGATTTAACTAAGTGCATCTAACTTACAGCAAGCAAGATACAAAATCTAC	AGATTTAACTAAGTGTATCTAACTTACAGCAAGCAAGATACAAAATCTAC	AGATTTAACTAAGTGTATATAACTTACAGCAAGCAAGATACAAAATCTAC	AGATTTAACTAAGTGTATATAACTTACAGCAAGCAAGATACAAGATCTAC	AGATTTAACTAAGTGTATATAACTTACAGCAAGCAAGATACAAGAACTAC	AGATTTAACTAAGTGTATATAATTTACAGCAAGCAAGATACAAGAACTAC	AGATTTAACTAAGTTTATATAATTTACAGCAAGCAAGATACAAGAACTAC	AGATTTAACTAAATTTATATAATTTACAGCAAGCAAGATACAAGAACTAC	AGATTTAACTAAATTTATATAATTTACAGCAAGCAAGATACAAGAACTAC	AGATTTAACTAAATTTATATAATTTACAGCAAGCAAGATACAAGAACTAC	AGATTTAACTAAATTTATATAATTTACAGCAAGCAAGATACAAGAACTAC	AGATTTAACTAAATTTATATAATTTACAGCAAGCAAGATACAAGAACTAC	AGATTTAACTAAATTTATATAATTTACAGCAAGCAAGATACAAGAACTAC	AGATTTAACTAAATTTATATAATTTACAGCAAGCAAGATACAAGAACTAC	AGATTTAACTAAATTTATATAATTTACAGCAAGCAAGATACAAGAACTAC	AGATTTAACTAAATTTATATAATTTACAGCAAGCAAGATACAAGAACTAC	AGATTTAACTAAATTTATATAATTTACAGCAAGCAAGATACAAGAACTAC	AGATTTAACTAAATTTATATAATTTACAGCAAGCAAGATACAAGAACTAC	AGATTTAACTAAATTTATATAATTTACAGCAAGCAAGATACAAGAACTAC	AGATTTAACTAAATTTATATAATTTACAGCAAGCAAGATACAAGAACTAC	AGATTTAACTAAATTTATATAATTTACAGCAAGCAAGATACAAGAACTAC	AGATTTAACTAAATTTATATAATTTACAGCAAGCAAGATACAAGAACTAC	AGATTTAACTAAATTTATATAATTTACAGCAAGCAAGATACAAGAACTAC	AGATTTAACTAAATTTATATAATTTACAGCAAGCAAGATACAAGAACTAC	AGATTTAACTAAATTTATATAATTTACAGCAAGCAAGATACAAGAACTAC	AGATTTAACTAAATTTATATAATTTACAGCAAGCAAGATACAAGAACTAC	AGATTTAACTAAATTTATATAATTTACAGCAAGCAAGATACAAGAACTAC
151	ATTTGCTGAGAAAGATTACCGTCGACCCTCCCCCTAGATAGCAAAGGATG	ATTTGCTAAGAAAGATTACCGTCGACCCTCCCCCTAGATAGCAAAGGATG	ATTTACTAAGAAAGATTACCGTCGACCCTCCCCCTAGATAGCAAAGGATG	ATTTACTAAGAAAGATTACCGTCGACCCTCCCCCTACATAGCAAAGGATG	ATTTACTAAGAAAGATTACAGTCGACCCTCCCCCTACATAGCAAAGGATG	ATTTACAAAGAAAGATTACAGTCGACCCTCCCCCTACATAGCAAAGGATG	ATTTACAAAGAAAGATTACAGTCGACCCTCCCCCTACATAGCAAACGATG	ATTTACAAAGCAAGATTACAGTCGACCCTCCCCCTACATAGCAAACGATG	AGTTACAAAGCAAGATTACAGTCGACCCTCCCCCTACATAGCAAACGATG	AGTTACAAAGCAAGATTACAGTCGAACCTCCCCCTACATAGCAAACGATG	AGTTACAAAGCAAGATTACAGACGAACCTCCCCCTACATAGCAAACGATG	AGTTACAAAGCAAGATTACAGACGAACCTCCCCCTACATAGCAAACTATG	AGTTACAAAGCAAGATTACAGACGAAACTCCCCCTACATAGCAAACTATG	AGTTACAAAGCAAGATTACAGACTAAACTCCCCCTACATAGCAAACTATG	AGTTACAAAGCAAGATTACAGATTAAACTCCCCCTACATAGCAAACTATG	AGATACAAAGCAAGATTACAGATTAAACTCCCCCTACATAGCAAACTATG	AGATACAAAGCAAGATTACAGATTAAACTACCCCTACATAGCAAACTATG	AGATACAAAGCAAGATTACAGATTAAACTACACCTACATAGCAAACTATG	AGATACAAAGCAAGATTACAGATTAAACTACAACTACATAGCAAACTATG	AGATACAAAGCAAGATTACAGATTAAACTACAATTACATAGCAAACTATG	AGATACAAAGCAAGATTACAGATTAAACTACGATTACATAGCAAACTATG	AGATACAAAGCAAGATTACAGATTAAACTACGATTACATAGCAAACTACG	AGATACAAAGCAAGATTACAGATTAAACTACGATTACAAAGCAAACTACG	AGATACAAAGCAAGACTACAGATTAAACTACGATTACAAAGCAAACTACG	AGATACAAAGCAAGACTACAAATTAAACTACGATTACAAAGCAAACTACG	AGATACAAAGCAAGACTACAAATTAAACTACAATTACAAAGCAAACTACG	AGATACAAAGCAAGACTACAAATTATACTACAATTACAAAGCAAACTACG	AGATACAAAGCAAGACTACAAATTTTACTACAATTACAAAGCAAACTACG	AGATACAAAGCAAGACTACAAATTTTACTACAATTACAAAGCAAACTACG	AGATACAAAGCAAGACTACAAATTTTACTACAATTACAAAGCAAACTACG	AGATACAAAGCAAGACTACAAATTTTACTACAATTACAAAGCAAACTACG	AGATACAAAGCAAGACTACAAATTTTACTACAATTACAAAGCAAACTACG	AGATACAAAGCAAGACTACAAATTTTACTACAATTACAAAGCAAACTACG	AGATACAAAGCAAGACTACAAATTTTACTACAATTACAAAGCAAACTACG	AGATACAAAGCAAGACTACAAATTTTACTACAATTACAAAGCAAACTACG	AGATACAAAGCAAGACTACAAATTTTACTACAATTACAAAGCAAACTACG	AGATACAAAGCAAGACTACAAATTTTACTACAATTACAAAGCAAACTACG	AGATACAAAGCAAGACTACAAATTTTACTACAATTACAAAGCAAACTACG	AGATACAAAGCAAGACTACAAATTTTACTACAATTACAAAGCAAACTACG	AGATACAAAGCAAGACTACAAATTTTACTACAATTACAAAGCAAACTACG	AGATACAAAGCAAGACTACAAATTTTACTACAATTACAAAGCAAACTACG
152	ATGACAGACACAGACGTCAGGTTGCCAGGTTTCACCCCACCACCTGGTAA	AAGACAGACACAGACGTCAGGTTGCCAGGTTTCACCCCACCACCTGGTAA	AAGACAGACACAGACGTCAGGTTACCAGGTTTCACCCCACCACCTGGTAA	AAGACAGACACAGACGTCAAGTTACCAGGTTTCACCCCACCACCTGGTAA	AAGACAGACACAGACGTCAAGTTACCAGGTTTCACCCCACCACCTGATAA	AAGACAGACACAGACGTCAAGTTACCAAGTTTCACCCCACCACCTGATAA	AAGACAGACACAGACGTCAAGTTACAAAGTTTCACCCCACCACCTGATAA	AAGACAGACACAGACGTCAAGATACAAAGTTTCACCCCACCACCTGATAA	AAGACAGACACAGACGTCAAGATACAAAGTTTCAACCCACCACCTGATAA	AAGACAGACACAGACGTCAAGATACAAAGTTTCAAGCCACCACCTGATAA	AAGACAGACACAGACGTCAAGATACAAAGTTTCAAGACACCACCTGATAA	AAGACAGACACAGACGTCAAGATACAAAGTTTCAAGACACAACCTGATAA	AAGACAGACACAGACATCAAGATACAAAGTTTCAAGACACAACCTGATAA	AAGACAGACACAGAAATCAAGATACAAAGTTTCAAGACACAACCTGATAA	AAGACAGACACAGAAATCAAGATACAAAGTTTCAAGACACAACCTTATAA	AAGACAGACACAGAAATCAAGATACAAAGTTTCAAGACACAAACTTATAA	AAGACAGACACAGAAATCAAGATACAAAGTTTCAAGACACAAAGTTATAA	AAGACAGACACAGAAATCAAGATACAAAGTTTCAAGACACAAAGATATAA	AAGACAGACACAGAAATCAAGATACAAAGTTTCAAGATACAAAGATATAA	AAGACAGACACAGAAATCAAGATACAAAGATTCAAGATACAAAGATATAA	AAGACAGACACAGAAATCAAGATACAAAGACTCAAGATACAAAGATATAA	AAGACAGATACAGAAATCAAGATACAAAGACTCAAGATACAAAGATATAA	AAGACATATACAGAAATCAAGATACAAAGACTCAAGATACAAAGATATAA	AAGATATATACAGAAATCAAGATACAAAGACTCAAGATACAAAGATATAA	AAGATATATACAGAAATCAAGATACAAAGACTCAAGATACAAAGATAAAA	AAGATATATACAGAAATCAAGATACAAAGACTCAAGATACAAAGATAAAG	AAGCTATATACAGAAATCAAGATACAAAGACTCAAGATACAAAGATAAAG	AAGCTATATACAGAAATCAAGATACAAAGACTCAAGATACAAAGATAAAG	AAGCTATATACAGAAATCAAGATACAAAGACTCAAGATACAAAGATAAAG	AAGCTATATACAGAAATCAAGATACAAAGACTCAAGATACAAAGATAAAG	AAGCTATATACAGAAATCAAGATACAAAGACTCAAGATACAAAGATAAAG	AAGCTATATACAGAAATCAAGATACAAAGACTCAAGATACAAAGATAAAG	AAGCTATATACAGAAATCAAGATACAAAGACTCAAGATACAAAGATAAAG	AAGCTATATACAGAAATCAAGATACAAAGACTCAAGATACAAAGATAAAG	AAGCTATATACAGAAATCAAGATACAAAGACTCAAGATACAAAGATAAAG	AAGCTATATACAGAAATCAAGATACAAAGACTCAAGATACAAAGATAAAG	AAGCTATATACAGAAATCAAGATACAAAGACTCAAGATACAAAGATAAAG	AAGCTATATACAGAAATCAAGATACAAAGACTCAAGATACAAAGATAAAG	AAGCTATATACAGAAATCAAGATACAAAGACTCAAGATACAAAGATAAAG	AAGCTATATACAGAAATCAAGATACAAAGACTCAAGATACAAAGATAAAG	AAGCTATATACAGAAATCAAGATACAAAGACTCAAGATACAAAGATAAAG
153	TTGGAGCGCGCTCATATAAGTCAAGATCTCGGAATCGCCAAGTTGATAAC	TTGGAGCGCGCTCATATAAGTCAAGATCTCGGAATCGCCAAGTTGATAAG	TTGGAGCGCGCTCATATAAGTCAAGATCTCAGAATCGCCAAGTTGATAAG	TTGGAGCGCGCTCATATAAGTCAAGATCTAAGAATCGCCAAGTTGATAAG	TTCGAGCGCGCTCATATAAGTCAAGATCTAAGAATCGCCAAGTTGATAAG	TTCGAGCACGCTCATATAAGTCAAGATCTAAGAATCGCCAAGTTGATAAG	TTCGAGCACGCTTATATAAGTCAAGATCTAAGAATCGCCAAGTTGATAAG	TTCGAGCAAGCTTATATAAGTCAAGATCTAAGAATCGCCAAGTTGATAAG	TTCGAGCAAGATTATATAAGTCAAGATCTAAGAATCGCCAAGTTGATAAG	TTCGAGCAAGATTATATAAGTCAAGATCCAAGAATCGCCAAGTTGATAAG	TTCGAGCAAGATTATACAAGTCAAGATCCAAGAATCGCCAAGTTGATAAG	TTCGAGCAAGATTATACAAGTCAAGATCCAAGAATCGACAAGTTGATAAG	TTCGAGCAAGATTATACAAGTCAAGATACAAGAATCGACAAGTTGATAAG	TTCGAGCAAGATTATACAAGTCAAGATACAAGAATCTACAAGTTGATAAG	TTCAAGCAAGATTATACAAGTCAAGATACAAGAATCTACAAGTTGATAAG	TTCAAGCAAGATTATACAAGACAAGATACAAGAATCTACAAGTTGATAAG	TCCAAGCAAGATTATACAAGACAAGATACAAGAATCTACAAGTTGATAAG	TCCAAGCAAGATTATACAAGACAAGATACAAGAATCTACAAATTGATAAG	TCCAAGCAAGATTATACAAGACAAGATACAAGAATCTACAAATTTATAAG	TCCAAGCAAGATTATACAAGACAAGATACAAGAATCTACAAATTTACAAG	TCCAAGCAAGATTATACAAGACAAGATACAAGAATATACAAATTTACAAG	TCCAAGCAAGATTATACAAGACAAGATACAAGAATATACAAATATACAAG	TCCAAGCAAGATTATACAAGACAAGTTACAAGAATATACAAATATACAAG	TCCAAGCAAGATTATACAAGAAAAGTTACAAGAATATACAAATATACAAG	TCCAAGCAAGATTATACAAGAAAAGTTACAAGAATATACAAATATACAAG	TCCAAGCAAGATTATACAAGAAAAGTTACAAGAATATACAAATATACAAG	TCCAAGCAAGATTATACAAGAAAAGTTACAAGAATATACAAATATACAAG	TCCAAGCAAGATTATACAAGAAAAGTTACAAGAATATACAAATATACAAG	TCCAAGCAAGATTATACAAGAAAAGTTACAAGAATATACAAATATACAAG	TCCAAGCAAGATTATACAAGAAAAGTTACAAGAATATACAAATATACAAG	TCCAAGCAAGATTATACAAGAAAAGTTACAAGAATATACAAATATACAAG	TCCAAGCAAGATTATACAAGAAAAGTTACAAGAATATACAAATATACAAG	TCCAAGCAAGATTATACAAGAAAAGTTACAAGAATATACAAATATACAAG	TCCAAGCAAGATTATACAAGAAAAGTTACAAGAATATACAAATATACAAG	TCCAAGCAAGATTATACAAGAAAAGTTACAAGAATATACAAATATACAAG	TCCAAGCAAGATTATACAAGAAAAGTTACAAGAATATACAAATATACAAG	TCCAAGCAAGATTATACAAGAAAAGTTACAAGAATATACAAATATACAAG	TCCAAGCAAGATTATACAAGAAAAGTTACAAGAATATACAAATATACAAG	TCCAAGCAAGATTATACAAGAAAAGTTACAAGAATATACAAATATACAAG	TCCAAGCAAGATTATACAAGAAAAGTTACAAGAATATACAAATATACAAG	TCCAAGCAAGATTATACAAGAAAAGTTACAAGAATATACAAATATACAAG
154	TTCGAGACGGAAACCTAACTTCATATCCGCTGCACAGTGCGTCCCTAAAG	TTCGAGACGGAAACCTAACTACATATCCGCTGCACAGTGCGTCCCTAAAG	TTCGAGACGGAAACCTAACTACATATCCGCTACACAGTGCGTCCCTAAAG	TTCAAGACGGAAACCTAACTACATATCCGCTACACAGTGCGTCCCTAAAG	TTCAAGACGGAAACCTAACTACATATCCGCTACACAGTACGTCCCTAAAG	TTCAAGACGGAAAGCTAACTACATATCCGCTACACAGTACGTCCCTAAAG	TTCAAGACGGAAAGCTAACTACATATCCGCTACACAGTACGTACCTAAAG	TTCAAGACGGAAAGCTAACTACATATCCGCTACACAGTACGTACATAAAG	TTCAAGACGGAAAGCTAACTACATATCCGCTACACAGTACGTATATAAAG	TTCAAGACGGAAAGCTAACTACATATCCGCTACACAGTACATATATAAAG	TTCAAGACGGAAAGCTAACTACATATCCGCTACAAAGTACATATATAAAG	TTCAAGACGGAAAGCTAACTACATATCAGCTACAAAGTACATATATAAAG	TTCAAGACGGAAAGCTAACTACATATCAGCTACAAAGTATATATATAAAG	TTCAAGACGGAAAGCTAACTACATATTAGCTACAAAGTATATATATAAAG	TTCAAGACGGAAAGCTAACTACATATTAACTACAAAGTATATATATAAAG	TTCAAGACGGAAAGCTAACTATATATTAACTACAAAGTATATATATAAAG	GTCAAGACGGAAAGCTAACTATATATTAACTACAAAGTATATATATAAAG	GTCAAGACGGAAAGCTAACTATATATTAACTACAAACTATATATATAAAG	GTCAAGACGGAAAGCTAACTATATAATAACTACAAACTATATATATAAAG	GTCAAGACGGTAAGCTAACTATATAATAACTACAAACTATATATATAAAG	GTCAAGACGGTAAACTAACTATATAATAACTACAAACTATATATATAAAG	GTCAAGACGGTAAACTAACTATATAAAAACTACAAACTATATATATAAAG	GTCAAGACGGTAAACTAACTATATAAAATCTACAAACTATATATATAAAG	GTCAAGACGGTAAACTAACTATATAAAATATACAAACTATATATATAAAG	GTCAAGACGGTAAACTAACTATATAAACTATACAAACTATATATATAAAG	GTCAAGACGGTAAACTAACTATATAAACTATATAAACTATATATATAAAG	GTCAAGACAGTAAACTAACTATATAAACTATATAAACTATATATATAAAG	GTCAAGACACTAAACTAACTATATAAACTATATAAACTATATATATAAAG	GTCAAGACACTAAACAAACTATATAAACTATATAAACTATATATATAAAG	GTCAAGACACTATACAAACTATATAAACTATATAAACTATATATATAAAG	GTCAAGAAACTATACAAACTATATAAACTATATAAACTATATATATAAAG	GTCAAGAAACTATACAAATTATATAAACTATATAAACTATATATATAAAG	GTCAAGAAACTATACAAATTATATAAACTATATAAACTATATATATAAAG	GTCAAGAAACTATACAAATTATATAAACTATATAAACTATATATATAAAG	GTCAAGAAACTATACAAATTATATAAACTATATAAACTATATATATAAAG	GTCAAGAAACTATACAAATTATATAAACTATATAAACTATATATATAAAG	GTCAAGAAACTATACAAATTATATAAACTATATAAACTATATATATAAAG	GTCAAGAAACTATACAAATTATATAAACTATATAAACTATATATATAAAG	GTCAAGAAACTATACAAATTATATAAACTATATAAACTATATATATAAAG	GTCAAGAAACTATACAAATTATATAAACTATATAAACTATATATATAAAG	GTCAAGAAACTATACAAATTATATAAACTATATAAACTATATATATAAAG
155	CCAGACTAAGTGCGAGCGTAGTGTCATTCATGCGAGCATTCATGCCCCGT	CCAGACTAAGTGCGAGCGTAGTGTCATTCAAGCGAGCATTCATGCCCCGT	CCAGACTAAGTGCGAGCGTAGTGTCATTCAAGCGAGCATTCATGCCCAGT	CCAGACTAAGTGCGAGCGTAATGTCATTCAAGCGAGCATTCATGCCCAGT	CCAGACTAAGTACGAGCGTAATGTCATTCAAGCGAGCATTCATGCCCAGT	CAAGACTAAGTACGAGCGTAATGTCATTCAAGCGAGCATTCATGCCCAGT	CAAGACTAAGTACGAGCGTAATGTCATTCAAGCAAGCATTCATGCCCAGT	CAAGACTAAGTACGAGCGTAATGTCATTCAAGCAAGCATTCATGTCCAGT	CAAGACTAAGTACGAGCGTAATGTCATTCAAGCAAGAATTCATGTCCAGT	CAAGACTACGTACGAGCGTAATGTCATTCAAGCAAGAATTCATGTCCAGT	CAAGACTACGTACAAGCGTAATGTCATTCAAGCAAGAATTCATGTCCAGT	CAAGACTACGTACAAGAGTAATGTCATTCAAGCAAGAATTCATGTCCAGT	CAAGACTACGTACAAGAGTAATGTCATTCAAGCAAGAAATCATGTCCAGT	CAAGACTACGTACAAGAGTAATGTCATTCAAGCAAGAAATAATGTCCAGT	CAAGACTACATACAAGAGTAATGTCATTCAAGCAAGAAATAATGTCCAGT	CAAGATTACATACAAGAGTAATGTCATTCAAGCAAGAAATAATGTCCAGT	CAAGATTACATACAAGAGTAATGTCATTCAAGCAAGACATAATGTCCAGT	CAAGATTACATACAAGAGTAATGTCAATCAAGCAAGACATAATGTCCAGT	CAAGATTACATACAAGAGTAATGTCAATCAAGCAAGACATAATGTACAGT	CAAGATTACATACAAGAATAATGTCAATCAAGCAAGACATAATGTACAGT	CAAGATTACATACAAGAATAAAGTCAATCAAGCAAGACATAATGTACAGT	CAAGATTACATACAAGAATAAAGTCAATCAAACAAGACATAATGTACAGT	CAAGATTACATACAAGAATCAAGTCAATCAAACAAGACATAATGTACAGT	CAAGATTACATACAAGAATCAAGTCAATAAAACAAGACATAATGTACAGT	CAAGATTACATACAAGAATCAAGACAATAAAACAAGACATAATGTACAGT	CAAGATTACATACAAGAATCAAGACTATAAAACAAGACATAATGTACAGT	CAAGATTACATACAAGAATCAAGATTATAAAACAAGACATAATGTACAGT	CAAGATTACATACAAGAATCAAGATTACAAAACAAGACATAATGTACAGT	CAAGATTACATACAAGAATCAAGATTACAAAACAAGACATAATGTACAGT	CAAGATTACATACAAGAATCAAGATTACAAAACAAGACATAATGTACAGT	CAAGATTACATACAAGAATCAAGATTACAAAACAAGACATAATGTACAGT	CAAGATTACATACAAGAATCAAGATTACAAAACAAGACATAATGTACAGT	CAAGATTACATACAAGAATCAAGATTACAAAACAAGACATAATGTACAGT	CAAGATTACATACAAGAATCAAGATTACAAAACAAGACATAATGTACAGT	CAAGATTACATACAAGAATCAAGATTACAAAACAAGACATAATGTACAGT	CAAGATTACATACAAGAATCAAGATTACAAAACAAGACATAATGTACAGT	CAAGATTACATACAAGAATCAAGATTACAAAACAAGACATAATGTACAGT	CAAGATTACATACAAGAATCAAGATTACAAAACAAGACATAATGTACAGT	CAAGATTACATACAAGAATCAAGATTACAAAACAAGACATAATGTACAGT	CAAGATTACATACAAGAATCAAGATTACAAAACAAGACATAATGTACAGT	CAAGATTACATACAAGAATCAAGATTACAAAACAAGACATAATGTACAGT
156	ACGGAGCCCCCCACAACAAAGGTGCCTAAGCCAAATGTGTTAAGTCGGCG	ACGGAGCCCCCCACAACAAAGGTGCCTAAGCCAAAAGTGTTAAGTCGGCG	ACGGAGCCCCCCACAACAAAGGTGCCTAAGCCAAAAGTGTTAAGTCGACG	ACGGAGCCCCCCACAACAAAGGTGCCTAAGCCAAAAGTGTTAAGTTGACG	ACGGAGCCCCCCACAACAAAGGTGCCTAAGCCAAAAGTGTTAAGATGACG	AAGGAGCCCCCCACAACAAAGGTGCCTAAGCCAAAAGTGTTAAGATGACG	AAGGAGCCCCACACAACAAAGGTGCCTAAGCCAAAAGTGTTAAGATGACG	AAGGAGCCCTACACAACAAAGGTGCCTAAGCCAAAAGTGTTAAGATGACG	AAGAAGCCCTACACAACAAAGGTGCCTAAGCCAAAAGTGTTAAGATGACG	AAAAAGCCCTACACAACAAAGGTGCCTAAGCCAAAAGTGTTAAGATGACG	AGAAAGCCCTACACAACAAAGGTGCCTAAGCCAAAAGTGTTAAGATGACG	AGAAAGCCCTACAAAACAAAGGTGCCTAAGCCAAAAGTGTTAAGATGACG	AGAAAGCCCTACAAAACAAAGGTGCCTAAGACAAAAGTGTTAAGATGACG	AGAAAGCCCTACAAAACAAAGGTGACTAAGACAAAAGTGTTAAGATGACG	AGAAAGCCCTACAAAACAAAGGTTACTAAGACAAAAGTGTTAAGATGACG	AGAAAGCCCTACAAAACAAAGGTTACTAAGACAAAAGAGTTAAGATGACG	AGAAAGCCCTACAAAACAAAGGTTACTAAGACAAAAGATTTAAGATGACG	AGAAAGCCCTACAAAACAAAGGTTACTAAGACAAAAGATTCAAGATGACG	AGAAAGCCCTACAAAACAAAGATTACTAAGACAAAAGATTCAAGATGACG	AGAAAGCCCTACAAAACTAAGATTACTAAGACAAAAGATTCAAGATGACG	AGAAAGACCTACAAAACTAAGATTACTAAGACAAAAGATTCAAGATGACG	AGAAAGACCTACAAAACTAAGATTACTAAGACAAAAGATTCAAGATGACT	AGAAAGACCTACAAAACTAAGATTACTAAGACATAAGATTCAAGATGACT	AGAAAGACCTACAAAACTAAGATTACTAAGATATAAGATTCAAGATGACT	AGAAAGACCTACAAGACTAAGATTACTAAGATATAAGATTCAAGATGACT	AGAAAGACCTACAAGACTAAGATTACAAAGATATAAGATTCAAGATGACT	AGAAAGACCTACAAGACTAAGATTACAAAGATTTAAGATTCAAGATGACT	AGAAAGACCTACAAGACTAAGATTACAAAGAATTAAGATTCAAGATGACT	AGAAAGACCTACAAGACTAAGATTACAAAGAATCAAGATTCAAGATGACT	AGAAAGACCTACAAGACTAAGATTACAAAGAATCAAGATTCAAGATGACT	AGAAAGACCTACAAGACTAAGATTACAAAGAATCAAGATTCAAGATGACT	AGAAAGACCTACAAGACTAAGATTACAAAGAATCAAGATTCAAGATGACT	AGAAAGACCTACAAGACTAAGATTACAAAGAATCAAGATTCAAGATGACT	AGAAAGACCTACAAGACTAAGATTACAAAGAATCAAGATTCAAGATGACT	AGAAAGACCTACAAGACTAAGATTACAAAGAATCAAGATTCAAGATGACT	AGAAAGACCTACAAGACTAAGATTACAAAGAATCAAGATTCAAGATGACT	AGAAAGACCTACAAGACTAAGATTACAAAGAATCAAGATTCAAGATGACT	AGAAAGACCTACAAGACTAAGATTACAAAGAATCAAGATTCAAGATGACT	AGAAAGACCTACAAGACTAAGATTACAAAGAATCAAGATTCAAGATGACT	AGAAAGACCTACAAGACTAAGATTACAAAGAATCAAGATTCAAGATGACT	AGAAAGACCTACAAGACTAAGATTACAAAGAATCAAGATTCAAGATGACT
157	TCTGTCGTCAATGCCATTAAAGTTACATAACAAGGAAGCCATCTGTCCGC	TCTGTCGTCAATCCCATTAAAGTTACATAACAAGGAAGCCATCTGTCCGC	TCTGTCGTCAATCCCATTAAAGTTACATAACAAGGAAGCCATCAGTCCGC	TCTGTCGTCAATCCCATTAAAGTTACATAACAAGAAAGCCATCAGTCCGC	TCTGTCGTCAATCCCATTAAAGTTACATAACAAGAAAGCCATCAGTCAGC	TCTGTCGTCAATCCCATTAAAGTTACATAACAAGAAAGACATCAGTCAGC	TCTGTCGTCAATCCCATTAAAGTTATATAACAAGAAAGACATCAGTCAGC	TCTGTCGTCAATCCTATTAAAGTTATATAACAAGAAAGACATCAGTCAGC	TCTGTCGTCAATCCTATTAAAGTTATATAACAAGAAAGACATCAGTCAGG	TCTGTCGTCAATCCTATTAAAGTTATATAACAAGAAAGACATCAGTCAAG	TCCGTCGTCAATCCTATTAAAGTTATATAACAAGAAAGACATCAGTCAAG	TCCGTCGTCAATCCTATAAAAGTTATATAACAAGAAAGACATCAGTCAAG	TCCGTCGTCAATACTATAAAAGTTATATAACAAGAAAGACATCAGTCAAG	TCCGTCGTCAAGACTATAAAAGTTATATAACAAGAAAGACATCAGTCAAG	TCCGTCCTCAAGACTATAAAAGTTATATAACAAGAAAGACATCAGTCAAG	TCCGTCCTCAAGACTATAAAAATTATATAACAAGAAAGACATCAGTCAAG	TCCGTACTCAAGACTATAAAAATTATATAACAAGAAAGACATCAGTCAAG	TCCGTACACAAGACTATAAAAATTATATAACAAGAAAGACATCAGTCAAG	TCCGTACACAAGACTATAAAAATTATATAACAAGAAAGACAACAGTCAAG	TCCGTACACAAGACTATAAAAATTATATAACAAGAAAGACAAGAGTCAAG	TCCGTACACAAGACTATAAAAATTATATAACAAGAAAGACAAGAATCAAG	TCCCTACACAAGACTATAAAAATTATATAACAAGAAAGACAAGAATCAAG	TCCCTACACAAGACTACAAAAATTATATAACAAGAAAGACAAGAATCAAG	TCCCTACACAAGACTACAAAGATTATATAACAAGAAAGACAAGAATCAAG	TCCCTACACAAGACTACAAAGATTATATAACAAGACAGACAAGAATCAAG	TCCCTACACAAGACTACAAAGATTATATAACAAGACATACAAGAATCAAG	TCCCTACACAAGACTACAAAGATTATATAACAAGACTTACAAGAATCAAG	TCCCTACACAAGACTACAAAGATTATATAACAAGACTTACAAGAATCAAG	TCCCTACACAAGACTACAAAGATTATATAACAAGACTTACAAGAATCAAG	TCCCTACACAAGACTACAAAGATTATATAACAAGACTTACAAGAATCAAG	TCCCTACACAAGACTACAAAGATTATATAACAAGACTTACAAGAATCAAG	TCCCTACACAAGACTACAAAGATTATATAACAAGACTTACAAGAATCAAG	TCCCTACACAAGACTACAAAGATTATATAACAAGACTTACAAGAATCAAG	TCCCTACACAAGACTACAAAGATTATATAACAAGACTTACAAGAATCAAG	TCCCTACACAAGACTACAAAGATTATATAACAAGACTTACAAGAATCAAG	TCCCTACACAAGACTACAAAGATTATATAACAAGACTTACAAGAATCAAG	TCCCTACACAAGACTACAAAGATTATATAACAAGACTTACAAGAATCAAG	TCCCTACACAAGACTACAAAGATTATATAACAAGACTTACAAGAATCAAG	TCCCTACACAAGACTACAAAGATTATATAACAAGACTTACAAGAATCAAG	TCCCTACACAAGACTACAAAGATTATATAACAAGACTTACAAGAATCAAG	TCCCTACACAAGACTACAAAGATTATATAACAAGACTTACAAGAATCAAG
158	TAAAGTAGAGGTAAGCGCTGAGATTACTTTCGCAAGAGGCAGCGCGTCGG	TAAAGTAGAGGTAAGCGATGAGATTACTTTCGCAAGAGGCAGCGCGTCGG	TAAAGTACAGGTAAGCGATGAGATTACTTTCGCAAGAGGCAGCGCGTCGG	TAAAGTACAGGTAAGCGATGAGATTACTTTCGCAAGAGGCAGCGCGTAGG	TAAAGTACAGGTAAGCGATGAGATTACTTTCGCAAGAGACAGCGCGTAGG	TAAAGTACAGGTAAGCGATGAGATTACTTTCGCAAGAGACAGCGAGTAGG	TAAAGTACAGGTAAGCGATGAGATTACTTTCGCAAGAGACAGCGAGTATG	TAAAGTACAGATAAGCGATGAGATTACTTTCGCAAGAGACAGCGAGTATG	TAAAGTACAGATAAGCGATGAGAGTACTTTCGCAAGAGACAGCGAGTATG	TAAAGTACAGATAAGCGATGAGAGTACTTTCGCAAGAGACAGCAAGTATG	TAAACTACAGATAAGCGATGAGAGTACTTTCGCAAGAGACAGCAAGTATG	TAAACTACATATAAGCGATGAGAGTACTTTCGCAAGAGACAGCAAGTATG	TAAACTACATACAAGCGATGAGAGTACTTTCGCAAGAGACAGCAAGTATG	TAAACTACATACAAGAGATGAGAGTACTTTCGCAAGAGACAGCAAGTATG	TAAACTACTTACAAGAGATGAGAGTACTTTCGCAAGAGACAGCAAGTATG	TAAACTACTTACAAGAGATGAGAGTACTTTCGCAAGAGAAAGCAAGTATG	TAAACTACTTACAAGAGATGAGAGTACTTTCGCAAGACAAAGCAAGTATG	TAAACTACTTACAAGAGATGAGAGTACTTTCGCAAGACAAAGCAAGTAAG	TAAACTACTTACAAGAGATGAGAGTACTTTCGCAAGACAAAGCAAGCAAG	TAAACTACTTACAAGAGATGAGTGTACTTTCGCAAGACAAAGCAAGCAAG	TAAACTACTTACAAGAGATGAGTGTATTTTCGCAAGACAAAGCAAGCAAG	TAAACTACTTACAAGAGATGACTGTATTTTCGCAAGACAAAGCAAGCAAG	TAAACTACTTACAAGAGATGACTGCATTTTCGCAAGACAAAGCAAGCAAG	TAAACTACTTACAAGACATGACTGCATTTTCGCAAGACAAAGCAAGCAAG	TAAACTACTTACAAGACATGACTGCATTTTCGCAAGACAAAGCAAGCAAG	TAAACTACTTACAAGACATGACTGCATTTTCGCAAGACAAAGCAAGCAAG	TAAACTACTTACAAGACATGACTGCATTTTCGCAAGACAAAGCAAGCAAG	TAAACTACTTACAAGACATGACTGCATTTTCGCAAGACAAAGCAAGCAAG	TAAACTACTTACAAGACATGACTGCATTTTCGCAAGACAAAGCAAGCAAG	TAAACTACTTACAAGACATGACTGCATTTTCGCAAGACAAAGCAAGCAAG	TAAACTACTTACAAGACATGACTGCATTTTCGCAAGACAAAGCAAGCAAG	TAAACTACTTACAAGACATGACTGCATTTTCGCAAGACAAAGCAAGCAAG	TAAACTACTTACAAGACATGACTGCATTTTCGCAAGACAAAGCAAGCAAG	TAAACTACTTACAAGACATGACTGCATTTTCGCAAGACAAAGCAAGCAAG	TAAACTACTTACAAGACATGACTGCATTTTCGCAAGACAAAGCAAGCAAG	TAAACTACTTACAAGACATGACTGCATTTTCGCAAGACAAAGCAAGCAAG	TAAACTACTTACAAGACATGACTGCATTTTCGCAAGACAAAGCAAGCAAG	TAAACTACTTACAAGACATGACTGCATTTTCGCAAGACAAAGCAAGCAAG	TAAACTACTTACAAGACATGACTGCATTTTCGCAAGACAAAGCAAGCAAG	TAAACTACTTACAAGACATGACTGCATTTTCGCAAGACAAAGCAAGCAAG	TAAACTACTTACAAGACATGACTGCATTTTCGCAAGACAAAGCAAGCAAG
159	GGCACTTGATCATCCTTCGCTGGCTACAACAGTTGCACATTAGCCGTGTA	GGCACTTGATCATCCTTCGCTGGCTACAACAGTTGCACATTAGCCGTGAA	GGCACTTGATCATCCTTCGCTGACTACAACAGTTGCACATTAGCCGTGAA	GGCACTTGATCATCCTTCGCTGACTACAACAGTTACACATTAGCCGTGAA	GGCACTTGATCATCCTTCGCTGACTACAAAAGTTACACATTAGCCGTGAA	GGCACTTGATCATCCTTCGCTAACTACAAAAGTTACACATTAGCCGTGAA	GGCACTTGATCATACTTCGCTAACTACAAAAGTTACACATTAGCCGTGAA	GGCACTTGATCATACTTCGCTAACTACAAAAGTTACAAATTAGCCGTGAA	GGCACTTGATCATACTTCGCTAACTACAAAAATTACAAATTAGCCGTGAA	GGCACTAGATCATACTTCGCTAACTACAAAAATTACAAATTAGCCGTGAA	GGCACAAGATCATACTTCGCTAACTACAAAAATTACAAATTAGCCGTGAA	GTCACAAGATCATACTTCGCTAACTACAAAAATTACAAATTAGCCGTGAA	GTCACAAGATTATACTTCGCTAACTACAAAAATTACAAATTAGCCGTGAA	GTCCCAAGATTATACTTCGCTAACTACAAAAATTACAAATTAGCCGTGAA	GTCCCAAGATTATACTTCGCTAACTACAAAAATTACAAATTAGCCGTGAG	GTCCCAAGATTATACATCGCTAACTACAAAAATTACAAATTAGCCGTGAG	GTCCCAAGATTATACATCGATAACTACAAAAATTACAAATTAGCCGTGAG	GTCCCAAGATTATACAACGATAACTACAAAAATTACAAATTAGCCGTGAG	GTCCCAAGATTATACAAAGATAACTACAAAAATTACAAATTAGCCGTGAG	GTCCCAAGATTATACAAAGATAACTACAAAAATTACAAATTAGACGTGAG	GTCCCAAGATTATACAAAGATAACTACAAAAATTACAAATTAGAGGTGAG	GTCCCAAGATTATACAAAGATAACTACAAAAATTACAAATTACAGGTGAG	GTCCCAAGATTATACAAAGATAACTACAAAAATTACAAATTACAGGTAAG	GTCCCAAGATTATACAAAGATAACTACAAAAATTACAAATTACAGATAAG	GTCCCAAGATTATACAAAGTTAACTACAAAAATTACAAATTACAGATAAG	GTCCCAAGATTATACAAAGTTAACTACAAAAACTACAAATTACAGATAAG	GTCCCAAGATTATACAAAGTTAACTACAAAAACTACAAACTACAGATAAG	GTCCCAAGATTATACAAAGTTAACTACAAAGACTACAAACTACAGATAAG	GTCCCAAGATTATACAAAGTTAACTACAAAGTCTACAAACTACAGATAAG	GTCCCAAGATTATACAAAGTTAACTACAAAGTCTACAAACTACAGATAAG	GTCCCAAGATTATACAAAGTTAACTACAAAGTCTACAAACTACAGATAAG	GTCCCAAGATTATACAAAGTTAACTACAAAGTCTACAAACTACAGATAAG	GTCCCAAGATTATACAAAGTTAACTACAAAGTCTACAAACTACAGATAAG	GTCCCAAGATTATACAAAGTTAACTACAAAGTCTACAAACTACAGATAAG	GTCCCAAGATTATACAAAGTTAACTACAAAGTCTACAAACTACAGATAAG	GTCCCAAGATTATACAAAGTTAACTACAAAGTCTACAAACTACAGATAAG	GTCCCAAGATTATACAAAGTTAACTACAAAGTCTACAAACTACAGATAAG	GTCCCAAGATTATACAAAGTTAACTACAAAGTCTACAAACTACAGATAAG	GTCCCAAGATTATACAAAGTTAACTACAAAGTCTACAAACTACAGATAAG	GTCCCAAGATTATACAAAGTTAACTACAAAGTCTACAAACTACAGATAAG	GTCCCAAGATTATACAAAGTTAACTACAAAGTCTACAAACTACAGATAAG
160	AGAACAGACAATTACTCAAATGTGTTGATCATGTCAACCATGCTTCCCAC	TGAACAGACAATTACTCAAATGTGTTGATCATGTCAACCATGCTTCCCAC	TGAACAGACAATTACTCAAATGTGTTTATCATGTCAACCATGCTTCCCAC	TGAACAGACAAGTACTCAAATGTGTTTATCATGTCAACCATGCTTCCCAC	TGAACAGACAAGTAGTCAAATGTGTTTATCATGTCAACCATGCTTCCCAC	TGAACAGACAAGTAGTCAAATGTGTTTATCATGTCAACCATGCTTCCCCC	TGACCAGACAAGTAGTCAAATGTGTTTATCATGTCAACCATGCTTCCCCC	TGACGAGACAAGTAGTCAAATGTGTTTATCATGTCAACCATGCTTCCCCC	TGATGAGACAAGTAGTCAAATGTGTTTATCATGTCAACCATGCTTCCCCC	TGATGACACAAGTAGTCAAATGTGTTTATCATGTCAACCATGCTTCCCCC	TGATGACACAAGTAGTCAAATGCGTTTATCATGTCAACCATGCTTCCCCC	TGATGACACAAGTAGTCAAATGCGCTTATCATGTCAACCATGCTTCCCCC	TGATGACACAAGTAGTCAAATGCGCTTATCATGTCTACCATGCTTCCCCC	TGATGACACAAGAAGTCAAATGCGCTTATCATGTCTACCATGCTTCCCCC	TGATGACACAAGAAGTCAAATGCGCTTATCATGTCTACCCTGCTTCCCCC	TGATGACACAAGAAGTCAAATGCGCTTATCAAGTCTACCCTGCTTCCCCC	TGATGACACAAGAAGTCAAATACGCTTATCAAGTCTACCCTGCTTCCCCC	TGATGACACAAGAAGTCAAATACGCTTATCAAGTCTACACTGCTTCCCCC	TGATGACACAAGAAGTCAAATACGCTTATCAAGACTACACTGCTTCCCCC	TGATGACACAAGAAGTCAAATACGCTTATCAAGACTACACAGCTTCCCCC	TGATGACACAAGAAGTCAAATACGCTAATCAAGACTACACAGCTTCCCCC	TGATGACACAAGAAGTCAAATACGCTAATCAAGACTACAAAGCTTCCCCC	TGATGACACAAGAAGTCAAATACGCTAATCAAGACTACAAAGCTTACCCC	TGATGACACAAGAAGTCAAATACGCTAAACAAGACTACAAAGCTTACCCC	TGATGACACAAGAAGTCAAATACACTAAACAAGACTACAAAGCTTACCCC	TGAAGACACAAGAAGTCAAATACACTAAACAAGACTACAAAGCTTACCCC	AGAAGACACAAGAAGTCAAATACACTAAACAAGACTACAAAGCTTACCCC	AGAATACACAAGAAGTCAAATACACTAAACAAGACTACAAAGCTTACCCC	AGAATATACAAGAAGTCAAATACACTAAACAAGACTACAAAGCTTACCCC	AGAATATACAAGAAGTCAAATACACTATACAAGACTACAAAGCTTACCCC	AGAATATACAAGAAGTTAAATACACTATACAAGACTACAAAGCTTACCCC	AGAATATACAAGAAGTTATATACACTATACAAGACTACAAAGCTTACCCC	AGAATATACAAGAAGTTATATAAACTATACAAGACTACAAAGCTTACCCC	AGAATATACAAGAAGTTATATAAACTATACAAGACTACAAAGATTACCCC	AGAATATACAAGAAGTTATATAAACTATACAAGACTACAAAGATTACACC	AGAATATACAAGAAGTTATATAAACTATACAAGACTACAAAGATTACAAC	AGAATATACAAGAAGTTATATAAACTATACAAGACTACAAAGATTACAAG	AGAATATACAAGAAGCTATATAAACTATACAAGACTACAAAGATTACAAG	AGAATATACAAGAAACTATATAAACTATACAAGACTACAAAGATTACAAG	AGAATATACAAGAAACTATATAAACTATACAAGACTACAAAGACTACAAG	AGAATATACAAGAAACTATATAAACTATACAAAACTACAAAGACTACAAG
161	GAAAAGTTGTTCAATGCGCGAGAGCCGGAGTATAGCACAGTTACCCAGCA	GAAAAGTTGTTCAATTCGCGAGAGCCGGAGTATAGCACAGTTACCCAGCA	GAAAAGTTGTTCAATTCGCGAGAGCCGGAGTATAGCACAGTTACACAGCA	GAAAAGTTGTTCAATTCGCAAGAGCCGGAGTATAGCACAGTTACACAGCA	GAAAAGTCGTTCAATTCGCAAGAGCCGGAGTATAGCACAGTTACACAGCA	GAAAAGTCGTTCAATTCGCAAGAACCGGAGTATAGCACAGTTACACAGCA	GAAAAGTCGTTCAATTCGCAAGAACCGGAGTATAGCACAGTTACAAAGCA	GAAAAGTCGTACAATTCGCAAGAACCGGAGTATAGCACAGTTACAAAGCA	GAAAAGTCCTACAATTCGCAAGAACCGGAGTATAGCACAGTTACAAAGCA	GAAAAGTCCTACAATTCGCAAGAACCGGAGTATAGCAAAGTTACAAAGCA	GAAAAGTCCTACAATTCACAAGAACCGGAGTATAGCAAAGTTACAAAGCA	GAAAAGTCCTACAATTCACAAGAACCGGAGTATAGCAAAGTTACAAAGAA	GAAAAGTCCTACAATTCACAAGAACCGGAGTATAGCAAAGTTACAAAGAT	GAAAAGTCCTACAATTCACAAGAACAGGAGTATAGCAAAGTTACAAAGAT	GAAAAGTCCTACAATTCACAAGAACAAGAGTATAGCAAAGTTACAAAGAT	GAAAAGTCCTACAATTCACAAGAACAAGAGTATATCAAAGTTACAAAGAT	GAAAAGTCCTACAATTCACAAGAACAAGAGTATATAAAAGTTACAAAGAT	GAAAAGTCCTACAATTCACAAGAACAAGATTATATAAAAGTTACAAAGAT	GAAAAGTCCTACAATTCACAAGATCAAGATTATATAAAAGTTACAAAGAT	GAAAAGTCCTACAATTAACAAGATCAAGATTATATAAAAGTTACAAAGAT	GAAAAGTCCTACAAATAACAAGATCAAGATTATATAAAAGTTACAAAGAT	AAAAAGTCCTACAAATAACAAGATCAAGATTATATAAAAGTTACAAAGAT	AGAAAGTCCTACAAATAACAAGATCAAGATTATATAAAAGTTACAAAGAT	AGAAAGTCCTACAAATAACAAGATCAAGATTATATAAAATTTACAAAGAT	AGAAAGTCCTACAAATAACAAGATCAAGACTATATAAAATTTACAAAGAT	AGAAAGTCCTACAAATTACAAGATCAAGACTATATAAAATTTACAAAGAT	AGAAAGTCCTACAAATTACAAGATTAAGACTATATAAAATTTACAAAGAT	AGAAAGTCCTACAAATTACAAGACTAAGACTATATAAAATTTACAAAGAT	AGAAAGTCCTACAAATTACAAGACTAAGATTATATAAAATTTACAAAGAT	AGAAAGACCTACAAATTACAAGACTAAGATTATATAAAATTTACAAAGAT	AGAAAGACCTACAAATTACAAGACTAAGATTATATAAAATTTACAAAGAT	AGAAAGACCTACAAATTACAAGACTAAGATTATATAAAATTTACAAAGAT	AGAAAGACCTACAAATTACAAGACTAAGATTATATAAAATTTACAAAGAT	AGAAAGACCTACAAATTACAAGACTAAGATTATATAAAATTTACAAAGAT	AGAAAGACCTACAAATTACAAGACTAAGATTATATAAAATTTACAAAGAT	AGAAAGACCTACAAATTACAAGACTAAGATTATATAAAATTTACAAAGAT	AGAAAGACCTACAAATTACAAGACTAAGATTATATAAAATTTACAAAGAT	AGAAAGACCTACAAATTACAAGACTAAGATTATATAAAATTTACAAAGAT	AGAAAGACCTACAAATTACAAGACTAAGATTATATAAAATTTACAAAGAT	AGAAAGACCTACAAATTACAAGACTAAGATTATATAAAATTTACAAAGAT	AGAAAGACCTACAAATTACAAGACTAAGATTATATAAAATTTACAAAGAT
162	AAATTACTTGACATAAGCAATTTGACCACCTACTCGGTCGACTTACATCG	AAATTACTTAACATAAGCAATTTGACCACCTACTCGGTCGACTTACATCG	AAATTACTTAACATAAGCAATTTGACCACCTACTAGGTCGACTTACATCG	AAATTACTTAACATAAGCAATTTGACCACCTACTAAGTCGACTTACATCG	AAATTACTTAACATAAGCAATTTGACTACCTACTAAGTCGACTTACATCG	AAATTACTTAAGATAAGCAATTTGACTACCTACTAAGTCGACTTACATCG	AAATTACTTAAGATAAGCAATTTGACTACCTACTAAGTCTACTTACATCG	AAATTACTTAAGATAAGCAATTTGACTACCTACAAAGTCTACTTACATCG	AAATTACTTAAGATAAGCAATTTTACTACCTACAAAGTCTACTTACATCG	AAATTACTTAAGATAAGCAATTTTACTAACTACAAAGTCTACTTACATCG	AAATTACTTAAGATAAGCAATTTTACTAACTACAAAGTCTACTTACAACG	AAATTACTTAAGATAAGCAATTTTACTAACTACAAAGTCTACTTACAAAG	AGATTACTTAAGATAAGCAATTTTACTAACTACAAAGTCTACTTACAAAG	AGATTACATAAGATAAGCAATTTTACTAACTACAAAGTCTACTTACAAAG	AGATTACATAAGACAAGCAATTTTACTAACTACAAAGTCTACTTACAAAG	AGATTACATAAGACAAGCAATTTTACTAACTACAAAGACTACTTACAAAG	AGATTACATAAGACAAGCAATTTTACTAACTACAAAGACTATTTACAAAG	AGATTACATAAGACAAGAAATTTTACTAACTACAAAGACTATTTACAAAG	AGATTACATAAGACAAGACATTTTACTAACTACAAAGACTATTTACAAAG	AGATTATATAAGACAAGACATTTTACTAACTACAAAGACTATTTACAAAG	AGATTATATAAGACAAGACATTCTACTAACTACAAAGACTATTTACAAAG	AGATTATATAAGACAAGACATACTACTAACTACAAAGACTATTTACAAAG	AGATTATATAAGACAAGACATACTATTAACTACAAAGACTATTTACAAAG	AGATTATATAAGACAAGACAAACTATTAACTACAAAGACTATTTACAAAG	AGATTATATAAGACAAGACAAACTATTTACTACAAAGACTATTTACAAAG	AGATTATACAAGACAAGACAAACTATTTACTACAAAGACTATTTACAAAG	AGATTATACAAGACAATACAAACTATTTACTACAAAGACTATTTACAAAG	AGATTATACAAGACTATACAAACTATTTACTACAAAGACTATTTACAAAG	AGATTATACAAGACTATACAAACTATATACTACAAAGACTATTTACAAAG	AGATTATACAAGACTATACAAGCTATATACTACAAAGACTATTTACAAAG	AGATTATACAAGACTATACAAGTTATATACTACAAAGACTATTTACAAAG	AGATTATACAAGACTATACAAGTTATATACTACAAAGACTATTTACAAAG	AGATTATACAAGACTATACAAGTTATATACTACAAAGACTATTTACAAAG	AGATTATACAAGACTATACAAGTTATATACTACAAAGACTATTTACAAAG	AGATTATACAAGACTATACAAGTTATATACTACAAAGACTATTTACAAAG	AGATTATACAAGACTATACAAGTTATATACTACAAAGACTATTTACAAAG	AGATTATACAAGACTATACAAGTTATATACTACAAAGACTATTTACAAAG	AGATTATACAAGACTATACAAGTTATATACTACAAAGACTATTTACAAAG	AGATTATACAAGACTATACAAGTTATATACTACAAAGACTATTTACAAAG	AGATTATACAAGACTATACAAGTTATATACTACAAAGACTATTTACAAAG	AGATTATACAAGACTATACAAGTTATATACTACAAAGACTATTTACAAAG
163	TACGAACTCACTCCACGCTCAGTGAGACAGCAAACGCCTAGCGAGCAGAT	TACGAACTCACTCCACGCTCAGTGAGACAGCAAACGACTAGCGAGCAGAT	TACGAACTCACTCCACGCTCAGTGAGACAGCAAACGACTAGCAAGCAGAT	TACGAACTCACTCCACGCTCAGTGAGACAGCAAACGACTAGCAAGAAGAT	TACGAACTCACTCCACGCTCAGTGAGACAGCAAACGACAAGCAAGAAGAT	TACGAACTCACTCCACGCTCAGTGAGACAGCAAACTACAAGCAAGAAGAT	TACGAACTCACTACACGCTCAGTGAGACAGCAAACTACAAGCAAGAAGAT	TACAAACTCACTACACGCTCAGTGAGACAGCAAACTACAAGCAAGAAGAT	TACAAATTCACTACACGCTCAGTGAGACAGCAAACTACAAGCAAGAAGAT	TACAAATTCACTACACGCTCAGTGAGACAGGAAACTACAAGCAAGAAGAT	TACAAATTCACTACACGCTCAGTGAGACAAGAAACTACAAGCAAGAAGAT	TACAAATTCACTACAAGCTCAGTGAGACAAGAAACTACAAGCAAGAAGAT	TACAAATTCACTACAAGATCAGTGAGACAAGAAACTACAAGCAAGAAGAT	TACAAATTTACTACAAGATCAGTGAGACAAGAAACTACAAGCAAGAAGAT	TACAAATTTACTACAAGATCAGTGAGACAAGAAACTACAAACAAGAAGAT	TACAAATTTACTACAAGATCAGTGAGACAAGAAACTACAAACAAGAAGAG	TACAAATTTACTACAAGATCAGTGAGACAAGAAACTACAAACAAGAAAAG	TACAAATTTACTACAAGATCAGTGAGACAAGAAACTACAAACAAGACAAG	TACAAATTTACTACAAGATCAGTGAGACAAGAAACTACAGACAAGACAAG	TACAAATTTACTACAAGACCAGTGAGACAAGAAACTACAGACAAGACAAG	TACAAATTTACTACAAGACAAGTGAGACAAGAAACTACAGACAAGACAAG	TACAAATTTACTACAAGACAAGAGAGACAAGAAACTACAGACAAGACAAG	TACAAATTTACTACAAGACAAGAAAGACAAGAAACTACAGACAAGACAAG	TACAAATTTACTACAAGACAAGAAAGACAAGAAACTACATACAAGACAAG	TACAAATTTACTACAAGACAAGCAAGACAAGAAACTACATACAAGACAAG	TACAAATTTAATACAAGACAAGCAAGACAAGAAACTACATACAAGACAAG	TACAAATTTAAGACAAGACAAGCAAGACAAGAAACTACATACAAGACAAG	TACAAATTCAAGACAAGACAAGCAAGACAAGAAACTACATACAAGACAAG	TACAAAGTCAAGACAAGACAAGCAAGACAAGAAACTACATACAAGACAAG	TACAAAGACAAGACAAGACAAGCAAGACAAGAAACTACATACAAGACAAG	TACAAAGACAAGACAAGACAAGCAAGACAAGAAACTACATACAAGACAAG	TACAAAGACAAGACAAGACAAGCAAGACAAGAAACTACATACAAGACAAG	TACAAAGACAAGACAAGACAAGCAAGACAAGAAACTACATACAAGACAAG	TACAAAGACAAGACAAGACAAGCAAGACAAGAAACTACATACAAGACAAG	TACAAAGACAAGACAAGACAAGCAAGACAAGAAACTACATACAAGACAAG	TACAAAGACAAGACAAGACAAGCAAGACAAGAAACTACATACAAGACAAG	TACAAAGACAAGACAAGACAAGCAAGACAAGAAACTACATACAAGACAAG	TACAAAGACAAGACAAGACAAGCAAGACAAGAAACTACATACAAGACAAG	TACAAAGACAAGACAAGACAAGCAAGACAAGAAACTACATACAAGACAAG	TACAAAGACAAGACAAGACAAGCAAGACAAGAAACTACATACAAGACAAG	TACAAAGACAAGACAAGACAAGCAAGACAAGAAACTACATACAAGACAAG
164	CCATACCTATGCCAAGTTAATTAAGAGACTTACCCCGGTCCCTCGGCACT	CCATACCTAAGCCAAGTTAATTAAGAGACTTACCCCGGTCCCTCGGCACT	CCATACCTAAGCCAAGTTAATTAAGATACTTACCCCGGTCCCTCGGCACT	CCATACCTAAGCCAATTTAATTAAGATACTTACCCCGGTCCCTCGGCACT	CCATACCTAAGCCTATTTAATTAAGATACTTACCCCGGTCCCTCGGCACT	CCATACCTAAGCCTATTTAATTAAGATACTTACCCCAGTCCCTCGGCACT	CCATACCTAAGCCTATTTAATTAAGATACTTACCCAAGTCCCTCGGCACT	CCATACCTAAGCCTATTTAATTAAGATACTTACTCAAGTCCCTCGGCACT	CCATACCTAAGCCTATTTAATTAAGATACTTACTCAAGTCCCTCGACACT	CCATACATAAGCCTATTTAATTAAGATACTTACTCAAGTCCCTCGACACT	CCATACATAAGACTATTTAATTAAGATACTTACTCAAGTCCCTCGACACT	CTATACATAAGACTATTTAATTAAGATACTTACTCAAGTCCCTCGACACT	CTATATATAAGACTATTTAATTAAGATACTTACTCAAGTCCCTCGACACT	CTATATATAAAACTATTTAATTAAGATACTTACTCAAGTCCCTCGACACT	CTATATATAAAACTATTTAATTAAGATACTTACTCAAGTCCCTCGACACG	CTATATATAAAACTATTTAATTAAGATACTTACTCAAGTCCCTCGACAAG	CTATATATAAAACTATTTAATTAAGATACTTACTCAAGTCCCACGACAAG	CTATATATAAAACTATTTAATTAAGATACTTACTCAAGTCCCAAGACAAG	CTATATATAAAACTATTTAATTAAGATACTTACTCAAGTCACAAGACAAG	CTATATATAAAACTATTTAATTAAGATACTTACTCAAGACACAAGACAAG	CTATATATAAAACTATTTAACTAAGATACTTACTCAAGACACAAGACAAG	CTATATATAAAACTATATAACTAAGATACTTACTCAAGACACAAGACAAG	CTATATATAAAACTATATAACTAAGATACTTATTCAAGACACAAGACAAG	CTATATATAAAACTATATAAATAAGATACTTATTCAAGACACAAGACAAG	CTATATATAAAACTATATAAATAAGATACTTATACAAGACACAAGACAAG	CTATATATAAAACTATATAAATAAGCTACTTATACAAGACACAAGACAAG	CTATATATAAAACTATATAAATAAACTACTTATACAAGACACAAGACAAG	CTATATATAAAACTATATAAATAAACTACTTATACAAGAGACAAGACAAG	CTATATATAAAACTATATAAATAAACTACTTATACAAGAGACAAGACAAG	CTATATATAAAACTATATAAATAAACTACTTATACAAGAGACAAGACAAG	CTATATATAAAACTATATAAATAAACTACTTATACAAGAGACAAGACAAG	CTATATATAAAACTATATAAATAAACTACTTATACAAGAGACAAGACAAG	CTATATATAAAACTATATAAATAAACTACTTATACAAGAGACAAGACAAG	CTATATATAAAACTATATAAATAAACTACTTATACAAGAGACAAGACAAG	CTATATATAAAACTATATAAATAAACTACTTATACAAGAGACAAGACAAG	CTATATATAAAACTATATAAATAAACTACTTATACAAGAGACAAGACAAG	CTATATATAAAACTATATAAATAAACTACTTATACAAGAGACAAGACAAG	CTATATATAAAACTATATAAATAAACTACTTATACAAGAGACAAGACAAG	CTATATATAAAACTATATAAATAAACTACTTATACAAGAGACAAGACAAG	CTATATATAAAACTATATAAATAAACTACTTATACAAGAGACAAGACAAG	CTATATATAAAACTATATAAATAAACTACTTATACAAGAGACAAGACAAG
165	TAGTAAGCCAAACTAATAGCCTATGTCCCTGGTCGTTATGCGATACGCAG	TGGTAAGCCAAACTAATAGCCTATGTCCCTGGTCGTTATGCGATACGCAG	TGGTAAGCCAAACTAATAGCCTATGTCCCTGGTCGTTATTCGATACGCAG	TGGTAAGCCAAACTAATAGCCTAAGTCCCTGGTCGTTATTCGATACGCAG	TGGTAAGCCAAACTAATAGCCTAAGTCCCTGGTCGTTATTCGATATGCAG	TGGTAAGCCAAACTAATAGCCTAAGTCCCTGGTCGTTATTCGATATGAAG	TGGTAAGCCAAACTAATAGCCTAAGTCCCAGGTCGTTATTCGATATGAAG	TGGTAAGCCAAACTAATAGCCTAAGTCCCAAGTCGTTATTCGATATGAAG	AGGTAAGCCAAACTAATAGCCTAAGTCCCAAGTCGTTATTCGATATGAAG	AGATAAGCCAAACTAATAGCCTAAGTCCCAAGTCGTTATTCGATATGAAG	AGATAAGCTAAACTAATAGCCTAAGTCCCAAGTCGTTATTCGATATGAAG	AGATAAGCTAAACTATTAGCCTAAGTCCCAAGTCGTTATTCGATATGAAG	AGATAAGCTAAACTATTAACCTAAGTCCCAAGTCGTTATTCGATATGAAG	AGATAAGCTAAACTATTAAACTAAGTCCCAAGTCGTTATTCGATATGAAG	AGACAAGCTAAACTATTAAACTAAGTCCCAAGTCGTTATTCGATATGAAG	AGACAAGCTAAACTATTAAACTAAGACCCAAGTCGTTATTCGATATGAAG	AGACAAGCTAAACTATTAAACTAAGACCCAAGTCGTTATTCAATATGAAG	AGACAAGCTAAACTATTAAACTAAGACCCAAGTCGTTATTCAAGATGAAG	AGACAAGATAAACTATTAAACTAAGACCCAAGTCGTTATTCAAGATGAAG	AGACAAGATAAACTATTAAACTAAGACCCAAGTCGTTATACAAGATGAAG	AGACAAGATAAACTATTAAACTAAGACCCAAGACGTTATACAAGATGAAG	AGACAAGATAAACTATTAAACTAAGACCCAAGAAGTTATACAAGATGAAG	AGACAAGATAAACTATTAAACTAAGACTCAAGAAGTTATACAAGATGAAG	AGACAAGACAAACTATTAAACTAAGACTCAAGAAGTTATACAAGATGAAG	AGACAAGACAAACTATTTAACTAAGACTCAAGAAGTTATACAAGATGAAG	AGACAAGACAAACTATTTAACTAAGAATCAAGAAGTTATACAAGATGAAG	AGACAAGACAAACTATTTAACTAAGAATCAAGAATTTATACAAGATGAAG	AGACAAGACAAACTATTTAACTAAGAATCAAGAATATATACAAGATGAAG	AGACAAGACAAACTATTTAACTAAGAATCAAGATTATATACAAGATGAAG	AGACAAGACAAACTATTTAACTAAGAATCAAGATTACATACAAGATGAAG	AGACAAGACAAACTATTTAACTAAGAATCAAGATTACATACAAGATGAAG	AGACAAGACAAACTATTTAACTAAGAATCAAGATTACATACAAGATGAAG	AGACAAGACAAACTATTTAACTAAGAATCAAGATTACATACAAGATGAAG	AGACAAGACAAACTATTTAACTAAGAATCAAGATTACATACAAGATGAAG	AGACAAGACAAACTATTTAACTAAGAATCAAGATTACATACAAGATGAAG	AGACAAGACAAACTATTTAACTAAGAATCAAGATTACATACAAGATGAAG	AGACAAGACAAACTATTTAACTAAGAATCAAGATTACATACAAGATGAAG	AGACAAGACAAACTATTTAACTAAGAATCAAGATTACATACAAGATGAAG	AGACAAGACAAACTATTTAACTAAGAATCAAGATTACATACAAGATGAAG	AGACAAGACAAACTATTTAACTAAGAATCAAGATTACATACAAGATGAAG	AGACAAGACAAACTATTTAACTAAGAATCAAGATTACATACAAGATGAAG
166	GGCGGACAGCTCGCACATGTTAGCACCAGTACCTTTACCGGTCAGATCGT	GGCGGACAGCTCGCACAAGTTAGCACCAGTACCTTTACCGGTCAGATCGT	GGCGGACAGCTCGCACAAGTTAGCACCAGTACCTTTACCGGTCAGATAGT	GGCGGACAGATCGCACAAGTTAGCACCAGTACCTTTACCGGTCAGATAGT	GGCGGACAGATCGCACAAGTTAGCACCAGTACCTTTACAGGTCAGATAGT	GGCGGACAGATCGCACAAGTTAGCACCAGTACCTTTACAGATCAGATAGT	GGCGGACAGATCGCACAAGTTAGCACCAGTACCTATACAGATCAGATAGT	GGCGGACAGATCGCACAAGTTAGCACAAGTACCTATACAGATCAGATAGT	GGCGGACAGATCGCACAAGTTAGTACAAGTACCTATACAGATCAGATAGT	GGCGGACAGATCGCACAAGTTACTACAAGTACCTATACAGATCAGATAGT	GTCGGACAGATCGCACAAGTTACTACAAGTACCTATACAGATCAGATAGT	GTCGTACAGATCGCACAAGTTACTACAAGTACCTATACAGATCAGATAGT	GTCCTACAGATCGCACAAGTTACTACAAGTACCTATACAGATCAGATAGT	GTCCTACAGATCGTACAAGTTACTACAAGTACCTATACAGATCAGATAGT	GTCCTACAGATCCTACAAGTTACTACAAGTACCTATACAGATCAGATAGT	GTCCTACAAATCCTACAAGTTACTACAAGTACCTATACAGATCAGATAGT	GTCCTACAAATCCTACAAGTTACTACAAGTATCTATACAGATCAGATAGT	GTCCTACAAATCCTACAAGATACTACAAGTATCTATACAGATCAGATAGT	GTCCTACAAATCCTACAAGATACTACAAGTATCTATACAGATCAGACAGT	GTCCTACAAATCCTACAAGATACTACAAGTATCTATACAGATAAGACAGT	GTCCTACAAATCCTACAAGATACTACAAGTATCTATACAAATAAGACAGT	GTCCTACAAATCCTACAAGAAACTACAAGTATCTATACAAATAAGACAGT	GTCCTACAAATCCTACAAGAAACTACAAGTATCTATATAAATAAGACAGT	GTCCTACAAATCCTACAAGAAACTACAAGTATTTATATAAATAAGACAGT	GTCCTACAAATCCTACAAGAAACTACAAGAATTTATATAAATAAGACAGT	GTCCTACAAATACTACAAGAAACTACAAGAATTTATATAAATAAGACAGT	GTCCTACAAATACTACAAGAAACTACAAGAATTTATATAACTAAGACAGT	GTCCTACAAATACTACAAGAAACTACAAGAATTTATATAACTAAGACAGC	GTCCTACAAATACTACAAGAAACTACAAGAATTTATATAACTAAGACAGC	GTCCTACAAATACTACAAGAAACTACAAGAATTTATATAACTAAGACAGC	GTCCTACAAATACTACAAGAAACTACAAGAATTTATATAACTAAGACAGC	GTCCTACAAATACTACAAGAAACTACAAGAATTTATATAACTAAGACAGC	GTCCTACAAATACTACAAGAAACTACAAGAATTTATATAACTAAGACAGC	GTCCTACAAATACTACAAGAAACTACAAGAATTTATATAACTAAGACAGC	GTCCTACAAATACTACAAGAAACTACAAGAATTTATATAACTAAGACAGC	GTCCTACAAATACTACAAGAAACTACAAGAATTTATATAACTAAGACAGC	GTCCTACAAATACTACAAGAAACTACAAGAATTTATATAACTAAGACAGC	GTCCTACAAATACTACAAGAAACTACAAGAATTTATATAACTAAGACAGC	GTCCTACAAATACTACAAGAAACTACAAGAATTTATATAACTAAGACAGC	GTCCTACAAATACTACAAGAAACTACAAGAATTTATATAACTAAGACAGC	GTCCTACAAATACTACAAGAAACTACAAGAATTTATATAACTAAGACAGC
167	AATTCGAACAAACCGTTGGTCTGGATCCATGCAGCTATACAAACGAAAGA	AATTCGAACAAACCGTTGGTCTGGATCCAAGCAGCTATACAAACGAAAGA	AATTCGAACAAACCGTTGGTCTGGATACAAGCAGCTATACAAACGAAAGA	AATTCGAACAAACCGTTGGTCTAGATACAAGCAGCTATACAAACGAAAGA	AATTCGAACAAACCGTTGGTCAAGATACAAGCAGCTATACAAACGAAAGA	AATTCGAACAAACCGTTGGTCAAGATACAAGCAGCTATACAAACGCAAGA	AATTCGAACAAACCGTTGGTCAAGATACAAGAAGCTATACAAACGCAAGA	AATTCGTACAAACCGTTGGTCAAGATACAAGAAGCTATACAAACGCAAGA	AATTCCTACAAACCGTTGGTCAAGATACAAGAAGCTATACAAACGCAAGA	AATTCCTACAAACCGTAGGTCAAGATACAAGAAGCTATACAAACGCAAGA	AATTCCTACAAACCGTAAGTCAAGATACAAGAAGCTATACAAACGCAAGA	AATTCCTACAAACCGTAAGTCAAGATACAAGAAGCTATACAAACTCAAGA	AATTCCTACAAACCCTAAGTCAAGATACAAGAAGCTATACAAACTCAAGA	AAGTCCTACAAACCCTAAGTCAAGATACAAGAAGCTATACAAACTCAAGA	AAGTCCTACAAACCCTAAATCAAGATACAAGAAGCTATACAAACTCAAGA	AAGTCCTACAAAACCTAAATCAAGATACAAGAAGCTATACAAACTCAAGA	AAGTCCTACAAAACCTAAATCAAGATACAAGAAGCTATACAAAGTCAAGA	AAGTCCTACAAAACCTAAATCAAGATACAAGAAGCTATACAAAGACAAGA	AAGTCCTACAAAATCTAAATCAAGATACAAGAAGCTATACAAAGACAAGA	AAGTCCTACAAAATCTAAAGCAAGATACAAGAAGCTATACAAAGACAAGA	AAGTCCTACAAAATCTAAAGCAAGATACAAGAAGCTATACAAAGACAAGA	AAGTCCTACAAAATCTAAAGCAAGATACAAGAAGCTATACAAAGACAAGA	AAGTCCTACAAAATCTAAAGCAAGATACAAGAAGCTATACAAAGACAAGA	AAGTCCTACAAAATCTAAAGCAAGATACAAGAAGCTATACAAAGACAAGA	AAGTCCTACAAAATCTAAAGCAAGATACAAGAAGCTATACAAAGACAAGA	AAGTCCTACAAAATCTAAAGCAAGATACAAGAAGCTATACAAAGACAAGA	AAGTCCTACAAAATCTAAAGCAAGATACAAGAAGCTATACAAAGACAAGA	AAGTCCTACAAAATCTAAAGCAAGATACAAGAAGCTATACAAAGACAAGA	AAGTCCTACAAAATCTAAAGCAAGATACAAGAAGCTATACAAAGACAAGA	AAGTCCTACAAAATCTAAAGCAAGATACAAGAAGCTATACAAAGACAAGA	AAGTCCTACAAAATCTAAAGCAAGATACAAGAAGCTATACAAAGACAAGA	AAGTCCTACAAAATCTAAAGCAAGATACAAGAAGCTATACAAAGACAAGA	AAGTCCTACAAAATCTAAAGCAAGATACAAGAAGCTATACAAAGACAAGA	AAGTCCTACAAAATCTAAAGCAAGATACAAGAAGCTATACAAAGACAAGA	AAGTCCTACAAAATCTAAAGCAAGATACAAGAAGCTATACAAAGACAAGA	AAGTCCTACAAAATCTAAAGCAAGATACAAGAAGCTATACAAAGACAAGA	AAGTCCTACAAAATCTAAAGCAAGATACAAGAAGCTATACAAAGACAAGA	AAGTCCTACAAAATCTAAAGCAAGATACAAGAAGCTATACAAAGACAAGA	AAGTCCTACAAAATCTAAAGCAAGATACAAGAAGCTATACAAAGACAAGA	AAGTCCTACAAAATCTAAAGCAAGATACAAGAAGCTATACAAAGACAAGA	AAGTCCTACAAAATCTAAAGCAAGATACAAGAAGCTATACAAAGACAAGA
168	TAGGACTAACACCGTATGCACAGTACCAATAGTAATCTTGGAATACGCAT	TAGGACTAACACCGTATACACAGTACCAATAGTAATCTTGGAATACGCAT	TAGGACTAACACCGTATACACAGTACCAATAGTAATCTTGGAATACGAAT	TAGGACTAACACCGTATACACAGTACCAATAGTAATCTAGGAATACGAAT	TAGGACTAACACCGTATACACAGTACCAATAGTAATCTAGGACTACGAAT	TAGGACTAACACCGTATACACAGTACCAAGAGTAATCTAGGACTACGAAT	TAGGACTAACACCGTATACACAGTACCAAGAGTAATCAAGGACTACGAAT	TAAGACTAACACCGTATACACAGTACCAAGAGTAATCAAGGACTACGAAT	TAAGACTAACACCGTATACAAAGTACCAAGAGTAATCAAGGACTACGAAT	TAAGACTAACACCGTATACAAAGTACCAAGAGTAATCAAGGACTACGAAG	TAAGACTAAGACCGTATACAAAGTACCAAGAGTAATCAAGGACTACGAAG	TAAGACTAAGACCGTATACAAAGTACCAAGAGTAATCAAGAACTACGAAG	TAAGACTAAGACCGTATACAAAGTACCAAGATTAATCAAGAACTACGAAG	TAAGACTAAGACCGTATACAAAGTACCAAGATTAAACAAGAACTACGAAG	TAAGACTAAGACCGTATACAAAGTACAAAGATTAAACAAGAACTACGAAG	TAAGACTAAGACCGTATACAAAGTACAAAGATTATACAAGAACTACGAAG	TAAGACTAAGACAGTATACAAAGTACAAAGATTATACAAGAACTACGAAG	TAAGACTAAGACACTATACAAAGTACAAAGATTATACAAGAACTACGAAG	TAAGACTAAGACACTATACAAACTACAAAGATTATACAAGAACTACGAAG	TAAGACTAAGACACTATATAAACTACAAAGATTATACAAGAACTACGAAG	TAAGACTAAGACACTATATAAACTACAAAGATTATATAAGAACTACGAAG	TAAGACTAAGACACTATATAAACTACAAAGATTATATAAGAACTACAAAG	TAAGACTAAGACACTATATAAACTACAAAGATTATATAAAAACTACAAAG	TAAGACTAAGAAACTATATAAACTACAAAGATTATATAAAAACTACAAAG	TAAGACTACGAAACTATATAAACTACAAAGATTATATAAAAACTACAAAG	CAAGACTACGAAACTATATAAACTACAAAGATTATATAAAAACTACAAAG	CAAGACTACGAAACTATATAAACTACAAAGATTATATAAAAACTACAAAG	CAAGACTACGAAACTATATAAACTACAAAGATTATATAAAAACTACAAAG	CAAGACTACGAAACTATATAAACTACAAAGATTATATAAAAACTACAAAG	CAAGACTACGAAACTATATAAACTACAAAGATTATATAAAAACTACAAAG	CAAGACTACGAAACTATATAAACTACAAAGATTATATAAAAACTACAAAG	CAAGACTACGAAACTATATAAACTACAAAGATTATATAAAAACTACAAAG	CAAGACTACGAAACTATATAAACTACAAAGATTATATAAAAACTACAAAG	CAAGACTACGAAACTATATAAACTACAAAGATTATATAAAAACTACAAAG	CAAGACTACGAAACTATATAAACTACAAAGATTATATAAAAACTACAAAG	CAAGACTACGAAACTATATAAACTACAAAGATTATATAAAAACTACAAAG	CAAGACTACGAAACTATATAAACTACAAAGATTATATAAAAACTACAAAG	CAAGACTACGAAACTATATAAACTACAAAGATTATATAAAAACTACAAAG	CAAGACTACGAAACTATATAAACTACAAAGATTATATAAAAACTACAAAG	CAAGACTACGAAACTATATAAACTACAAAGATTATATAAAAACTACAAAG	CAAGACTACGAAACTATATAAACTACAAAGATTATATAAAAACTACAAAG
169	AACCATTTGTCATGCACGGTAGAATTGGACGTCACTGTTTATCTTCGGGC	AACCATTTGTCATGAACGGTAGAATTGGACGTCACTGTTTATCTTCGGGC	AACCATTTGTCATGAACGGTAGAATTAGACGTCACTGTTTATCTTCGGGC	AACCATTTGTCATGAACGGTAGAATTAGACGTCACTGTTTATCTTCAGGC	AACCATTTGTCATGAACGGTAGAATTAGACGTCACTGTTTATCTACAGGC	AACCATTTGTCATGAACGGTAGAATTAGACGTCACTATTTATCTACAGGC	AACCATTTGTCATGAACGGTAGAATTAGAAGTCACTATTTATCTACAGGC	AACCATTTGTCATGAACGGTAGAATTAGAAGTCACTATTTATCTACAAGC	AACCATTTGTCATGAACGGTAGAATTAGAAGTCACTATTTATCTACAAGA	AAGCATTTGTCATGAACGGTAGAATTAGAAGTCACTATTTATCTACAAGA	AAGCATTTGTCATGAACGGTAGAATTACAAGTCACTATTTATCTACAAGA	AAGCATTTGTCATGAACGGTAGAATTACAAGTCACTATTTATATACAAGA	AAGCATTTGTCATGAACGGTACAATTACAAGTCACTATTTATATACAAGA	AAGCATTTGTCATGAACGGTACAATTACAAGACACTATTTATATACAAGA	AAGAATTTGTCATGAACGGTACAATTACAAGACACTATTTATATACAAGA	AAGAATTAGTCATGAACGGTACAATTACAAGACACTATTTATATACAAGA	AAGAATTAGTTATGAACGGTACAATTACAAGACACTATTTATATACAAGA	AAGAATTAGTTATGAACGGTACAAGTACAAGACACTATTTATATACAAGA	AAGAATTAATTATGAACGGTACAAGTACAAGACACTATTTATATACAAGA	AAGAATTAACTATGAACGGTACAAGTACAAGACACTATTTATATACAAGA	AAGAATTAACTATGAAAGGTACAAGTACAAGACACTATTTATATACAAGA	AAGAATTAACTATGAAAGGTACAAGTACAAGAAACTATTTATATACAAGA	AAGAATTAACTATGAAAGGTACAAGTACAAGAAACTATATATATACAAGA	AAGAATTAACTATGAAAGGTACAAGTACAAGAAGCTATATATATACAAGA	AAGAATTAACTATGAAAGCTACAAGTACAAGAAGCTATATATATACAAGA	AAGAATTAACTATGAAAACTACAAGTACAAGAAGCTATATATATACAAGA	AAGAATTAAATATGAAAACTACAAGTACAAGAAGCTATATATATACAAGA	AAGAATTAAATATGAAGACTACAAGTACAAGAAGCTATATATATACAAGA	AAGAATTAAATATGAAGACTACAAGTACAAGAAGCTATATATATACAAGA	AAGAATTAAATATGAAGACTACAAGTACAAGAAGCTATATATATACAAGA	AAGAATTAAATATGAAGACTACAAGTACAAGAAGCTATATATATACAAGA	AAGAATTAAATATGAAGACTACAAGTACAAGAAGCTATATATATACAAGA	AAGAATTAAATATGAAGACTACAAGTACAAGAAGCTATATATATACAAGA	AAGAATTAAATATGAAGACTACAAGTACAAGAAGCTATATATATACAAGA	AAGAATTAAATATGAAGACTACAAGTACAAGAAGCTATATATATACAAGA	AAGAATTAAATATGAAGACTACAAGTACAAGAAGCTATATATATACAAGA	AAGAATTAAATATGAAGACTACAAGTACAAGAAGCTATATATATACAAGA	AAGAATTAAATATGAAGACTACAAGTACAAGAAGCTATATATATACAAGA	AAGAATTAAATATGAAGACTACAAGTACAAGAAGCTATATATATACAAGA	AAGAATTAAATATGAAGACTACAAGTACAAGAAGCTATATATATACAAGA	AAGAATTAAATATGAAGACTACAAGTACAAGAAGCTATATATATACAAGA
170	AATGTTTGAGCGTATAGCGCCATTCATGTATTCGCTCGAACAGACCAGAA	AATGTTTGAGCGTATAGCGCCATTCAAGTATTCGCTCGAACAGACCAGAA	AAAGTTTGAGCGTATAGCGCCATTCAAGTATTCGCTCGAACAGACCAGAA	AAAGTTTGAGCGTATAGCGCCATTCAAGTATTCGCTCGAACAGACAAGAA	AAAGTTTGAGCGTATATCGCCATTCAAGTATTCGCTCGAACAGACAAGAA	AAAGTTTGAGCGTATATCGCCATTCAAGTATTAGCTCGAACAGACAAGAA	AAAGTTTGAGCGTATATCGCCATTCAAGAATTAGCTCGAACAGACAAGAA	AAAGTTTGAGCGTATATCGCCATTCAAGAATTAGCACGAACAGACAAGAA	AAAGTTTGAGCGTATATCGCCATTCAAGAATTAGCAAGAACAGACAAGAA	AGAGTTTGAGCGTATATCGCCATTCAAGAATTAGCAAGAACAGACAAGAA	AGAATTTGAGCGTATATCGCCATTCAAGAATTAGCAAGAACAGACAAGAA	AGAATTTAAGCGTATATCGCCATTCAAGAATTAGCAAGAACAGACAAGAA	AGAATTTAAGCGTATATCGCCATACAAGAATTAGCAAGAACAGACAAGAA	AGAATTTAAGCGTATATAGCCATACAAGAATTAGCAAGAACAGACAAGAA	AGAATTTAAGCGTATATAGCTATACAAGAATTAGCAAGAACAGACAAGAA	AGAATTTAAGCGTATATAACTATACAAGAATTAGCAAGAACAGACAAGAA	AGAATTTAAGTGTATATAACTATACAAGAATTAGCAAGAACAGACAAGAA	AGAATTTAACTGTATATAACTATACAAGAATTAGCAAGAACAGACAAGAA	AGAATTTAACTATATATAACTATACAAGAATTAGCAAGAACAGACAAGAA	AGAATTTAACTATATAAAACTATACAAGAATTAGCAAGAACAGACAAGAA	AGAATTTAACTATATAAGACTATACAAGAATTAGCAAGAACAGACAAGAA	AGAATTTAACTATACAAGACTATACAAGAATTAGCAAGAACAGACAAGAA	AGAATTTAACTAAACAAGACTATACAAGAATTAGCAAGAACAGACAAGAA	AGAATTTAACTAAACAAGACAATACAAGAATTAGCAAGAACAGACAAGAA	AGAATTTAATTAAACAAGACAATACAAGAATTAGCAAGAACAGACAAGAA	AGAATTTAATTAAACAAGAAAATACAAGAATTAGCAAGAACAGACAAGAA	AGAATTTAATTAAACAAGAAAATACAAGAATTAGCAAGAACAGACAAGAA	AGAATTTAATTAAACAAGAAAATACAAGAATTAGCAAGAACAGACAAGAA	AGAATTTAATTAAACAAGAAAATACAAGAATTAGCAAGAACAGACAAGAA	AGAATTTAATTAAACAAGAAAATACAAGAATTAGCAAGAACAGACAAGAA	AGAATTTAATTAAACAAGAAAATACAAGAATTAGCAAGAACAGACAAGAA	AGAATTTAATTAAACAAGAAAATACAAGAATTAGCAAGAACAGACAAGAA	AGAATTTAATTAAACAAGAAAATACAAGAATTAGCAAGAACAGACAAGAA	AGAATTTAATTAAACAAGAAAATACAAGAATTAGCAAGAACAGACAAGAA	AGAATTTAATTAAACAAGAAAATACAAGAATTAGCAAGAACAGACAAGAA	AGAATTTAATTAAACAAGAAAATACAAGAATTAGCAAGAACAGACAAGAA	AGAATTTAATTAAACAAGAAAATACAAGAATTAGCAAGAACAGACAAGAA	AGAATTTAATTAAACAAGAAAATACAAGAATTAGCAAGAACAGACAAGAA	AGAATTTAATTAAACAAGAAAATACAAGAATTAGCAAGAACAGACAAGAA	AGAATTTAATTAAACAAGAAAATACAAGAATTAGCAAGAACAGACAAGAA	AGAATTTAATTAAACAAGAAAATACAAGAATTAGCAAGAACAGACAAGAA
171	ACTGTTGTCTGACGCATTTAGGCAACGACAGAATCAACCACGCAGCGCAT	ACTGTTGTCTGACGCATTTAGGCAACGACAGAATCAACCACGCAGCGAAT	ACTGTTGTCTGACGCATTTAGGCAAAGACAGAATCAACCACGCAGCGAAT	ACTGTTTTCTGACGCATTTAGGCAAAGACAGAATCAACCACGCAGCGAAT	ACTGTTTTCTGACGCATTTAGGCAAAGACAGAATCAACTACGCAGCGAAT	ACTGTTTTCTGACGCATTTAGGCAAAGACAGAATCAACTACGAAGCGAAT	ACTGTTTTCTGACGCATTTAGGCAAAGACAGAATCAACTACGAAGAGAAT	ACTGTTTTCTGACGCATTTAGGCAAAGACAGAATCAACTACGAAGACAAT	ACTGTTTTCTGACGCATTTAGGCAAAGACAGAATCAACTACAAAGACAAT	ACTGTTTTATGACGCATTTAGGCAAAGACAGAATCAACTACAAAGACAAT	ACTGTTTTATGACGCATTTAGGCAAAGACAGAATCAACTACAAAGACAAG	ACTGTTTTATGACGCATTTAGGCAAAGACAGATTCAACTACAAAGACAAG	ACTGTTTTATGACGCATTTAAGCAAAGACAGATTCAACTACAAAGACAAG	AGTGTTTTATGACGCATTTAAGCAAAGACAGATTCAACTACAAAGACAAG	AGAGTTTTATGACGCATTTAAGCAAAGACAGATTCAACTACAAAGACAAG	AGAATTTTATGACGCATTTAAGCAAAGACAGATTCAACTACAAAGACAAG	AGAATTTAATGACGCATTTAAGCAAAGACAGATTCAACTACAAAGACAAG	AGAATTTAATTACGCATTTAAGCAAAGACAGATTCAACTACAAAGACAAG	AGAATTTAATTACGCATTTAAGCCAAGACAGATTCAACTACAAAGACAAG	AGAATTTACTTACGCATTTAAGCCAAGACAGATTCAACTACAAAGACAAG	AGAATTTACTTACGTATTTAAGCCAAGACAGATTCAACTACAAAGACAAG	AGAATTTACTTACGTATTTAAACCAAGACAGATTCAACTACAAAGACAAG	AGAATTTACATACGTATTTAAACCAAGACAGATTCAACTACAAAGACAAG	AGAAATTACATACGTATTTAAACCAAGACAGATTCAACTACAAAGACAAG	AGAAATTACATACGTATTTAAACCAAGAAAGATTCAACTACAAAGACAAG	AGAAATTACATACGTATTTAAACCAAGAAAGATTCAAGTACAAAGACAAG	AGAAATTACATACGTATTTAAAACAAGAAAGATTCAAGTACAAAGACAAG	AGAAATTACATACGTATTTAAAACAAGCAAGATTCAAGTACAAAGACAAG	AGAAATTACATACGTATATAAAACAAGCAAGATTCAAGTACAAAGACAAG	AGAAATTACATACGTATATAAAGCAAGCAAGATTCAAGTACAAAGACAAG	AGAAATTACATACGTATATAAAGCAAGCAAGATTCAAGTACAAAGACAAG	AGAAATTACATACGTATATAAAGCAAGCAAGATTCAAGTACAAAGACAAG	AGAAATTACATACGTATATAAAGCAAGCAAGATTCAAGTACAAAGACAAG	AGAAATTACATACGTATATAAAGCAAGCAAGATTCAAGTACAAAGACAAG	AGAAATTACATACGTATATAAAGCAAGCAAGATTCAAGTACAAAGACAAG	AGAAATTACATACGTATATAAAGCAAGCAAGATTCAAGTACAAAGACAAG	AGAAATTACATACGTATATAAAGCAAGCAAGATTCAAGTACAAAGACAAG	AGAAATTACATACGTATATAAAGCAAGCAAGATTCAAGTACAAAGACAAG	AGAAATTACATACGTATATAAAGCAAGCAAGATTCAAGTACAAAGACAAG	AGAAATTACATACGTATATAAAGCAAGCAAGATTCAAGTACAAAGACAAG	AGAAATTACATACGTATATAAAGCAAGCAAGATTCAAGTACAAAGACAAG
172	TACGACTCGTCCATGACGCTATCAAAGTATGTAACGCCCCCCAATTTCCC	TACGACTCGTCCATGACGCTATGAAAGTATGTAACGCCCCCCAATTTCCC	TACGACTCGTCCATGACGCTATGAAAGTATCTAACGCCCCCCAATTTCCC	TACGACTCGTCCAAGACGCTATGAAAGTATCTAACGCCCCCCAATTTCCC	TACGACTCGTCCAAGACGCTATGAAAGTATCTAAAGCCCCCCAATTTCCC	TACGACTCGTCCAAGACGCTATGAAAGTATCTAAAGCCCCCCAATTTGCC	TACGACTCGTCCAAGACGCTATGAAAGTATCTAAAGCCCCCCAATTAGCC	TACGACTAGTCCAAGACGCTATGAAAGTATCTAAAGCCCCCCAATTAGCC	TACTACTAGTCCAAGACGCTATGAAAGTATCTAAAGCCCCCCAATTAGCC	TACTACAAGTCCAAGACGCTATGAAAGTATCTAAAGCCCCCCAATTAGCC	TACTACAAGTCCAAGACGCTATGAAAGTATCTAAAGCCCCCCAATTAGTC	TACTACAAGTCCAAGACGCTATGAAAGTAACTAAAGCCCCCCAATTAGTC	TACTACAAGTCCAAGACGATATGAAAGTAACTAAAGCCCCCCAATTAGTC	TACTACAAATCCAAGACGATATGAAAGTAACTAAAGCCCCCCAATTAGTC	TACTACAAATACAAGACGATATGAAAGTAACTAAAGCCCCCCAATTAGTC	TACTACAAATACAAGACAATATGAAAGTAACTAAAGCCCCCCAATTAGTC	TACTACAAATACAAGACAAGATGAAAGTAACTAAAGCCCCCCAATTAGTC	TACTACAAATACAAGACAAGATGAAAGAAACTAAAGCCCCCCAATTAGTC	TACTACAAATACAAGACAAGATGAAAGAAACTAAAGGCCCCCAATTAGTC	TACTACAAATACAAGACAAGATGAAAGAAACTAAAGGCCCACAATTAGTC	TACTACAAATACAAGACAAGATGAAAGAAACTAAAGGCCTACAATTAGTC	TACTACAAATACAAGACAAGATGAAAGAAACTAAAGGCCTACAAATAGTC	TACTACAAATACAAGACAAGATGAAAGAAACTAAAGGCCTACAAAGAGTC	TACTACAGATACAAGACAAGATGAAAGAAACTAAAGGCCTACAAAGAGTC	TACTACAGATACAAGACAAGATGAAAGAAACTAAAGGCCTACAAAGAATC	TACTACAGATACAAGACAAGATGAAAGAAACTAAAGGCCTACAAAGAATT	TACTACAGATACAAGACAAGATGAAAGACACTAAAGGCCTACAAAGAATT	TACTACAGATACAAGACAAGATGAAAGACAATAAAGGCCTACAAAGAATT	TACTACAGATACAAGACAAGATGCAAGACAATAAAGGCCTACAAAGAATT	TACTACAGATACAAGACAAGATGCAAGACTATAAAGGCCTACAAAGAATT	TACTACAGATACAAGACAAGATGCAAGACTATAAAGGCCTACAAAGAATT	TACTACAGATACAAGACAAGATGCAAGACTATAAAGGCCTACAAAGAATT	TACTACAGATACAAGACAAGATGCAAGACTATAAAGGCCTACAAAGAATT	TACTACAGATACAAGACAAGATGCAAGACTATAAAGGCCTACAAAGAATT	TACTACAGATACAAGACAAGATGCAAGACTATAAAGGCCTACAAAGAATT	TACTACAGATACAAGACAAGATGCAAGACTATAAAGGCCTACAAAGAATT	TACTACAGATACAAGACAAGATGCAAGACTATAAAGGCCTACAAAGAATT	TACTACAGATACAAGACAAGATGCAAGACTATAAAGGCCTACAAAGAATT	TACTACAGATACAAGACAAGATGCAAGACTATAAAGGCCTACAAAGAATT	TACTACAGATACAAGACAAGATGCAAGACTATAAAGGCCTACAAAGAATT	TACTACAGATACAAGACAAGATGCAAGACTATAAAGGCCTACAAAGAATT
173	TAGCCCGAACCAGACGCACCGCTTAACCATTGAATAATCATATCAATGAA	TAGCCCGAACCAGACGCACCGCTTAACCATTGAATAATCATATCAAAGAA	TAGCCCGAACCAGACGCACCGCTTAACCATTGAATAATTATATCAAAGAA	TAGCCCGAACCAGACGCACCGCTTAACCATTGAATAATTATATAAAAGAA	TAGCCCGAACCAGACGCACCGCTTAACCATTGAATAATTATATACAAGAA	TAGCCCGAACAAGACGCACCGCTTAACCATTGAATAATTATATACAAGAA	TAGCCCAAACAAGACGCACCGCTTAACCATTGAATAATTATATACAAGAA	TAGCCCAAACAAGAAGCACCGCTTAACCATTGAATAATTATATACAAGAA	AAGCCCAAACAAGAAGCACCGCTTAACCATTGAATAATTATATACAAGAA	AAGCCCAAACAAGAAGCACCGCTTAACTATTGAATAATTATATACAAGAA	AAGCCCAAACAAGAAGCACCGCTTAACTATTTAATAATTATATACAAGAA	AAGCCCAAACAAGAAGCACCGATTAACTATTTAATAATTATATACAAGAA	AAGCCCAAACAAGAAGCACCGATTAACTATATAATAATTATATACAAGAA	AAGCCCAAACAAGAAGCACAGATTAACTATATAATAATTATATACAAGAA	AAGCCCAAACAAGAAGTACAGATTAACTATATAATAATTATATACAAGAA	AAGCCCAAACAAGAATTACAGATTAACTATATAATAATTATATACAAGAA	AAGCCCAAACAAGAATTACATATTAACTATATAATAATTATATACAAGAA	AAGCCCAGACAAGAATTACATATTAACTATATAATAATTATATACAAGAA	AAGCCCAGACAAGAATTACATATTAACTATATAAGAATTATATACAAGAA	AAGCCCAGACAAGAATTACATATTAACTATACAAGAATTATATACAAGAA	AAGCCCAGACAAGAATTACATATTTACTATACAAGAATTATATACAAGAA	AAGCCCAGACAAGAATTACAAATTTACTATACAAGAATTATATACAAGAA	AAGCCCAGACAAGAATTACAAATTTACTATACAAGAATTATATACAAGAA	AAGCCCAGACAAGAATTACAAATTTACTATACAAGAATTATATACAAGAA	AAGCCCAGACAAGAATTACAAATTTACTATACAAGAATTATATACAAGAA	AAGCCCAGACAAGAATTACAAATTTACTATACAAGAATTATATACAAGAA	AAGCCCAGACAAGAATTACAAATTTACTATACAAGAATTATATACAAGAA	AAGCCCAGACAAGAATTACAAATTTACTATACAAGAATTATATACAAGAA	AAGCCCAGACAAGAATTACAAATTTACTATACAAGAATTATATACAAGAA	AAGCCCAGACAAGAATTACAAATTTACTATACAAGAATTATATACAAGAA	AAGCCCAGACAAGAATTACAAATTTACTATACAAGAATTATATACAAGAA	AAGCCCAGACAAGAATTACAAATTTACTATACAAGAATTATATACAAGAA	AAGCCCAGACAAGAATTACAAATTTACTATACAAGAATTATATACAAGAA	AAGCCCAGACAAGAATTACAAATTTACTATACAAGAATTATATACAAGAA	AAGCCCAGACAAGAATTACAAATTTACTATACAAGAATTATATACAAGAA	AAGCCCAGACAAGAATTACAAATTTACTATACAAGAATTATATACAAGAA	AAGCCCAGACAAGAATTACAAATTTACTATACAAGAATTATATACAAGAA	AAGCCCAGACAAGAATTACAAATTTACTATACAAGAATTATATACAAGAA	AAGCCCAGACAAGAATTACAAATTTACTATACAAGAATTATATACAAGAA	AAGCCCAGACAAGAATTACAAATTTACTATACAAGAATTATATACAAGAA	AAGCCCAGACAAGAATTACAAATTTACTATACAAGAATTATATACAAGAA
174	TACATAACAACCATTTCGCCGTTATGTTTACTTGCAACTCGCAGCCTGTA	TACATAACAACCATTTCGCCGTTATGTTTACTTACAACTCGCAGCCTGTA	TACATAACAACCATTTCGCCGTTATGTTTACTTACAACTCGCAGCCTGAA	TACATAACAACCATTTAGCCGTTATGTTTACTTACAACTCGCAGCCTGAA	TACATAACAACCATTTAGCCGTTATGTTTACTTACAACTCGCAGACTGAA	TACATAACAACCATTTAGCCGTTATGTTTACTTACAAATCGCAGACTGAA	TACATAACAACTATTTAGCCGTTATGTTTACTTACAAATCGCAGACTGAA	TACATAACAACTATTTAGCAGTTATGTTTACTTACAAATCGCAGACTGAA	TACATAACAACTATTTAGCAGTTATGTTTACTTACAAATCGAAGACTGAA	TACATAACAACTATTTAGCAGTTATGTTTACTTACAAATCCAAGACTGAA	TACATAACAACTATTTAGCAGTTATGTTTACTTACAAAGCCAAGACTGAA	TACATAACAACTATTTAGCAGTTATGTTTACTTACAAAGTCAAGACTGAA	TACAAAACAACTATTTAGCAGTTATGTTTACTTACAAAGTCAAGACTGAA	TACAAAACAACTATTTAGCAGTTATGTTTACTTACAAAGTCAAGACAGAA	TACAAAAAAACTATTTAGCAGTTATGTTTACTTACAAAGTCAAGACAGAA	TACAAATAAACTATTTAGCAGTTATGTTTACTTACAAAGTCAAGACAGAA	TACAAATAAACTATTTAGCAGTTATGTTTACTTACAAAGTCAAGACAAAA	TACAAATAAACTATTTAGCAGTTATGTTTACTTACAAAGTCAAGACAAGA	TACAAATAAACTATTTAGCAATTATGTTTACTTACAAAGTCAAGACAAGA	TACAAATAAACTATTTAGCAAGTATGTTTACTTACAAAGTCAAGACAAGA	TACAAATAAACTATATAGCAAGTATGTTTACTTACAAAGTCAAGACAAGA	TACAAATAAACTATATAGCAAGTATGTCTACTTACAAAGTCAAGACAAGA	TACAAATAAACTATATAGCAAGTATGTCTACTTACAAAGTCAAGACAAGA	TACAAATAAACTATATAGCAAGTATGTCTACTTACAAAGTCAAGACAAGA	TACAAATAAACTATATAGCAAGTATGTCTACTTACAAAGTCAAGACAAGA	TACAAATAAACTATATAGCAAGTATGTCTACTTACAAAGTCAAGACAAGA	TACAAATAAACTATATAGCAAGTATGTCTACTTACAAAGTCAAGACAAGA	TACAAATAAACTATATAGCAAGTATGTCTACTTACAAAGTCAAGACAAGA	TACAAATAAACTATATAGCAAGTATGTCTACTTACAAAGTCAAGACAAGA	TACAAATAAACTATATAGCAAGTATGTCTACTTACAAAGTCAAGACAAGA	TACAAATAAACTATATAGCAAGTATGTCTACTTACAAAGTCAAGACAAGA	TACAAATAAACTATATAGCAAGTATGTCTACTTACAAAGTCAAGACAAGA	TACAAATAAACTATATAGCAAGTATGTCTACTTACAAAGTCAAGACAAGA	TACAAATAAACTATATAGCAAGTATGTCTACTTACAAAGTCAAGACAAGA	TACAAATAAACTATATAGCAAGTATGTCTACTTACAAAGTCAAGACAAGA	TACAAATAAACTATATAGCAAGTATGTCTACTTACAAAGTCAAGACAAGA	TACAAATAAACTATATAGCAAGTATGTCTACTTACAAAGTCAAGACAAGA	TACAAATAAACTATATAGCAAGTATGTCTACTTACAAAGTCAAGACAAGA	TACAAATAAACTATATAGCAAGTATGTCTACTTACAAAGTCAAGACAAGA	TACAAATAAACTATATAGCAAGTATGTCTACTTACAAAGTCAAGACAAGA	TACAAATAAACTATATAGCAAGTATGTCTACTTACAAAGTCAAGACAAGA
175	AGCCTGAGATCGTCAGGCCATTGTCAACCTTTCCATAATCTGAAGATCGA	AGACTGAGATCGTCAGGCCATTGTCAACCTTTCCATAATCTGAAGATCGA	AGACTGAGATCGTCAGGCCATTGTCAACCTTTCCATAATCTGAAGATAGA	AGACTGAGATCGTCAGGCCATTGTCAACCTTTCCATAATCTCAAGATAGA	AGACTGAGATCGTCAAGCCATTGTCAACCTTTCCATAATCTCAAGATAGA	AGACTGAGATCGTCAAGACATTGTCAACCTTTCCATAATCTCAAGATAGA	AGACTGAGATCGTCAAGACATAGTCAACCTTTCCATAATCTCAAGATAGA	AGACTGAGATCGTCAAGACATAGTCAACCTTTACATAATCTCAAGATAGA	AGACTGAGATCGTCAAGACATAGTCAACCTTTACATAATCTCAAGACAGA	AGACTGAGATCGTCAAGACATAGTCAACATTTACATAATCTCAAGACAGA	AGACTGAGATCGTCAAGACATAGTCTACATTTACATAATCTCAAGACAGA	AGACTAAGATCGTCAAGACATAGTCTACATTTACATAATCTCAAGACAGA	AGACTAAGATCGTCAAGACATAGTCTACATTTATATAATCTCAAGACAGA	AGACTAAGATCGTCAAGACATAGTCTACATTTATATAAACTCAAGACAGA	AGACTAAGATCGTCAAGACATAGTCTACATATATATAAACTCAAGACAGA	AGACTAAGATCGTCAAGACAAAGTCTACATATATATAAACTCAAGACAGA	AGACTAAGATCGTCAAGACAAAGTCTACATATATATAAAATCAAGACAGA	AGACAAAGATCGTCAAGACAAAGTCTACATATATATAAAATCAAGACAGA	AGACAAAGATCGTCAAGACAAAGTTTACATATATATAAAATCAAGACAGA	AGACAAAGATCGTCAAGACAAAGTTTACATATATATAAAAACAAGACAGA	AGACAAAGATCGTCAAGACAAAGTTTACATATATATAAAAACAAGACAGT	AGACAAAGATCGTCAAGACAAAGATTACATATATATAAAAACAAGACAGT	AGACAAAGATCATCAAGACAAAGATTACATATATATAAAAACAAGACAGT	AGACAAAGATTATCAAGACAAAGATTACATATATATAAAAACAAGACAGT	AGACAAAGACTATCAAGACAAAGATTACATATATATAAAAACAAGACAGT	AGACAAAGACTATCAAGACAAAGATTATATATATATAAAAACAAGACAGT	AGACAAAGACTATCAAGACTAAGATTATATATATATAAAAACAAGACAGT	AGACAAAGACTATCAAGACTAAGATTATATAAATATAAAAACAAGACAGT	AGACAAAGACTATCAAGACTAAGATTATATAAATATATAAACAAGACAGT	AGACAAAGACTATCAAGACTAAGATTATATAAATATATATACAAGACAGT	AGACAAAGACTATCAAGACTAAGATTATATAAATATATATACAAGACAGG	AGACAAAGACTATCAAGACTAAGATTATATAAATATATATACAAGACAAG	AGACAAAGACTATCAAGACTAAGATTATATAAATATATATACAAGACAAG	AGACAAAGACTATCAAGACTAAGATTATATAAATATATATACAAGACAAG	AGACAAAGACTATCAAGACTAAGATTATATAAATATATATACAAGACAAG	AGACAAAGACTATCAAGACTAAGATTATATAAATATATATACAAGACAAG	AGACAAAGACTATCAAGACTAAGATTATATAAATATATATACAAGACAAG	AGACAAAGACTATCAAGACTAAGATTATATAAATATATATACAAGACAAG	AGACAAAGACTATCAAGACTAAGATTATATAAATATATATACAAGACAAG	AGACAAAGACTATCAAGACTAAGATTATATAAATATATATACAAGACAAG	AGACAAAGACTATCAAGACTAAGATTATATAAATATATATACAAGACAAG
176	TGTTATTCGAAAGGGTCTTTCACCAGTCCAGAGTTTACGTTACGCTACCG	TGTTATTCGAAAGAGTCTTTCACCAGTCCAGAGTTTACGTTACGCTACCG	TGTTATTCGAAAGAGTCTTTCACAAGTCCAGAGTTTACGTTACGCTACCG	TGTTATTCGAAAGAGTCTTTCACAAGTCCAGAGTTTACGTTACGCTAACG	TGTTATTCGAAAGAGTCTTTCACAAGTCCAGAGTTTACGTTACGATAACG	TGTTATTCGAAAGAGTCTTTCACAAGTCCAGAGTTTACGTTACGATAAAG	TGTTATTCGAAAGAGTCTTTCACAAGTCCAGAGTTTACGTTACTATAAAG	TGTTATTCGAAAGAGTCTTTCACAAGTACAGAGTTTACGTTACTATAAAG	TGTTATTCGAAAGAGTCTTTCACAAGTACAAAGTTTACGTTACTATAAAG	TGTTATTCGAAAGAGTCTTTCACAAGTACAAAGTTTACGTTACTACAAAG	TGTTATACGAAAGAGTCTTTCACAAGTACAAAGTTTACGTTACTACAAAG	AGTTATACGAAAGAGTCTTTCACAAGTACAAAGTTTACGTTACTACAAAG	AGATATACGAAAGAGTCTTTCACAAGTACAAAGTTTACGTTACTACAAAG	AGATATACTAAAGAGTCTTTCACAAGTACAAAGTTTACGTTACTACAAAG	AGATATACTAAAGAGTCTTACACAAGTACAAAGTTTACGTTACTACAAAG	AGATATACTAAAAAGTCTTACACAAGTACAAAGTTTACGTTACTACAAAG	AGATATACTAAAAAGACTTACACAAGTACAAAGTTTACGTTACTACAAAG	AGATAAACTAAAAAGACTTACACAAGTACAAAGTTTACGTTACTACAAAG	AGATAAACTAAAAAGACTTACACAAGTACAAAGTTTACATTACTACAAAG	AGATAAACTAAAAAGACTTACACAAGTACAAAGTCTACATTACTACAAAG	AGATAAACTAAAAAGATTTACACAAGTACAAAGTCTACATTACTACAAAG	AGATAAACTAAAAAAATTTACACAAGTACAAAGTCTACATTACTACAAAG	AGATAAACTATAAAAATTTACACAAGTACAAAGTCTACATTACTACAAAG	AGATAAACTATAAAAATTTACAAAAGTACAAAGTCTACATTACTACAAAG	AGATAAACTATAAAAATTTACAAAACTACAAAGTCTACATTACTACAAAG	AGACAAACTATAAAAATTTACAAAACTACAAAGTCTACATTACTACAAAG	AGACAAACTATAAAAATTTACAAAACTACAAAGTCTACATTACTACAAAG	AGACAAACTATAAAAATTTACAAAACTACAAAGTCTACATTACTACAAAG	AGACAAACTATAAAAATTTACAAAACTACAAAGTCTACATTACTACAAAG	AGACAAACTATAAAAATTTACAAAACTACAAAGTCTACATTACTACAAAG	AGACAAACTATAAAAATTTACAAAACTACAAAGTCTACATTACTACAAAG	AGACAAACTATAAAAATTTACAAAACTACAAAGTCTACATTACTACAAAG	AGACAAACTATAAAAATTTACAAAACTACAAAGTCTACATTACTACAAAG	AGACAAACTATAAAAATTTACAAAACTACAAAGTCTACATTACTACAAAG	AGACAAACTATAAAAATTTACAAAACTACAAAGTCTACATTACTACAAAG	AGACAAACTATAAAAATTTACAAAACTACAAAGTCTACATTACTACAAAG	AGACAAACTATAAAAATTTACAAAACTACAAAGTCTACATTACTACAAAG	AGACAAACTATAAAAATTTACAAAACTACAAAGTCTACATTACTACAAAG	AGACAAACTATAAAAATTTACAAAACTACAAAGTCTACATTACTACAAAG	AGACAAACTATAAAAATTTACAAAACTACAAAGTCTACATTACTACAAAG	AGACAAACTATAAAAATTTACAAAACTACAAAGTCTACATTACTACAAAG
177	CGCCCAGAGAACAAGGCCCTTATACTGGCACCTGAGTCAAGCGAGACCGC	CGCCCAGAGAACAAGGCCCTTATACTGGCACCTGAGTCAAGCGAGACAGC	CGCCCAGAGAACAAGACCCTTATACTGGCACCTGAGTCAAGCGAGACAGC	CGCCCAGAGAACAAGACCCTTATACTGGCACCTGAGTCAAGCAAGACAGC	CGCCCAGAGAACAAGACACTTATACTGGCACCTGAGTCAAGCAAGACAGC	CGCCCAGACAACAAGACACTTATACTGGCACCTGAGTCAAGCAAGACAGC	CGCCCAGACAACAAGACACTTATACTAGCACCTGAGTCAAGCAAGACAGC	CGCCCAGACAACAAGACAATTATACTAGCACCTGAGTCAAGCAAGACAGC	GGCCCAGACAACAAGACAATTATACTAGCACCTGAGTCAAGCAAGACAGC	GGCCCAGACAACAAGACAATTATACAAGCACCTGAGTCAAGCAAGACAGC	GGCCCAGACAACAAGACAATTATACAAGCACCTAAGTCAAGCAAGACAGC	GGCCCAGACAACAAGACAATTATACAAGCAACTAAGTCAAGCAAGACAGC	GGCCCAGACAACAAGACAATTATACAAGCAACTAAGACAAGCAAGACAGC	GGCCCAGACAACAAGACAATTATACAAGCAACTAAGACAAACAAGACAGC	GGCCCAGACAACAAGACAATTATACAAGAAACTAAGACAAACAAGACAGC	GTCCCAGACAACAAGACAATTATACAAGAAACTAAGACAAACAAGACAGC	GTCCAAGACAACAAGACAATTATACAAGAAACTAAGACAAACAAGACAGC	GTCCAAGACAACAAGACAATTATACAAGAAACTAAGACAAACAAGACAGG	GTCCAAGACAACAAGACAATTATACAAGAAACTAAGACAAACAAGACAAG	GTCCAAGACAACAAGACAATTATACAAGAAACTAAGACAGACAAGACAAG	GTCCAAGAAAACAAGACAATTATACAAGAAACTAAGACAGACAAGACAAG	GTCCAAGAAAACAAGACAATTATACAAGAAACTAAGACAGACAAGACAAG	GTCCAAGAAAACAAGACAATTATACAAGAAACTAAGACAGACAAGACAAG	GTCCAAGAAAACAAGACAATTATACAAGAAACTAAGACAGACAAGACAAG	GTCCAAGAAAACAAGACAATTATACAAGAAACTAAGACAGACAAGACAAG	GTCCAAGAAAACAAGACAATTATACAAGAAACTAAGACAGACAAGACAAG	GTCCAAGAAAACAAGACAATTATACAAGAAACTAAGACAGACAAGACAAG	GTCCAAGAAAACAAGACAATTATACAAGAAACTAAGACAGACAAGACAAG	GTCCAAGAAAACAAGACAATTATACAAGAAACTAAGACAGACAAGACAAG	GTCCAAGAAAACAAGACAATTATACAAGAAACTAAGACAGACAAGACAAG	GTCCAAGAAAACAAGACAATTATACAAGAAACTAAGACAGACAAGACAAG	GTCCAAGAAAACAAGACAATTATACAAGAAACTAAGACAGACAAGACAAG	GTCCAAGAAAACAAGACAATTATACAAGAAACTAAGACAGACAAGACAAG	GTCCAAGAAAACAAGACAATTATACAAGAAACTAAGACAGACAAGACAAG	GTCCAAGAAAACAAGACAATTATACAAGAAACTAAGACAGACAAGACAAG	GTCCAAGAAAACAAGACAATTATACAAGAAACTAAGACAGACAAGACAAG	GTCCAAGAAAACAAGACAATTATACAAGAAACTAAGACAGACAAGACAAG	GTCCAAGAAAACAAGACAATTATACAAGAAACTAAGACAGACAAGACAAG	GTCCAAGAAAACAAGACAATTATACAAGAAACTAAGACAGACAAGACAAG	GTCCAAGAAAACAAGACAATTATACAAGAAACTAAGACAGACAAGACAAG	GTCCAAGAAAACAAGACAATTATACAAGAAACTAAGACAGACAAGACAAG
178	CTCTGGTAAATGACAAGAATCAAAGACATAATTCGTCTAACATCGTGGAC	CTCTGGTAAAAGACAAGAATCAAAGACATAATTCGTCTAACATCGTGGAC	CTCTGGTAAAAGACAAGAATCAAAGACATAATTCGTCTAACATGGTGGAC	CTCTGGTAAAAGACAAGAATCAAAGACATAATTCGTCTAACATGGTTGAC	CTCTGGTAAAAGACAAGAATCAAAGACATAATTCGTCTAACATGATTGAC	CTCTGGTAAAAGACAAGAATCAAATACATAATTCGTCTAACATGATTGAC	CTCTGGTAAAAGACAAGAATTAAATACATAATTCGTCTAACATGATTGAC	CTCTGGTACAAGACAAGAATTAAATACATAATTCGTCTAACATGATTGAC	CTCTGGTACAAGACAAGAATTAACTACATAATTCGTCTAACATGATTGAC	CTCTGGTACAAGACAAGAATTAACTATATAATTCGTCTAACATGATTGAC	CTCTGGTACAAGACAAGAATTAACTATATAAATCGTCTAACATGATTGAC	CTCTGGTACAAGACAAGAATTAACTATATAAATCGTATAACATGATTGAC	CTCTGATACAAGACAAGAATTAACTATATAAATCGTATAACATGATTGAC	CTCTGATACAAGACAAGAATTAACTATATAAATCGTATAACATGAGTGAC	CTCTTATACAAGACAAGAATTAACTATATAAATCGTATAACATGAGTGAC	TTCTTATACAAGACAAGAATTAACTATATAAATCGTATAACATGAGTGAC	TTCTTATACAAGACAAGAATTAACTATATAAATCGTATAAAATGAGTGAC	TTCTTATACAAGACAAGAATTAACTATATAAATTGTATAAAATGAGTGAC	TTCTTATACAAGACAAGAATTAACTATATAAATTATATAAAATGAGTGAC	TTCTTATACAAGACAAGAATTAACTATATAAATTATATACAATGAGTGAC	TTCTTATACAAGACAAGAATTAACTATATAAATTATATACAATGAGAGAC	TTCTTATACAAGACAAGAATTAACTATATAAATTATATACAAAGAGAGAC	TTCTTATACAAGACAAGAATTAACTATATAAATTATATACAAAGACAGAC	TTCTTATACAAGACAAGAATTAACTATATAAACTATATACAAAGACAGAC	TTCTTATACAAGACAAGAATTAACTATATAAACTATTTACAAAGACAGAC	TACTTATACAAGACAAGAATTAACTATATAAACTATTTACAAAGACAGAC	TAATTATACAAGACAAGAATTAACTATATAAACTATTTACAAAGACAGAC	AAATTATACAAGACAAGAATTAACTATATAAACTATTTACAAAGACAGAC	AGATTATACAAGACAAGAATTAACTATATAAACTATTTACAAAGACAGAC	AGATTATACAAGACAAGAATTAACTATATAAACTATTTACAAAGACAGTC	AGATTATACAAGACAAGAATTAACTATATAAACTATTTACAAAGATAGTC	AGATTATACAAGACAAGAATTAACTATATAAACTATTTACAAAGATAGTC	AGATTATACAAGACAAGAATTAACTATATAAACTATTTACAAAGATAGTC	AGATTATACAAGACAAGAATTAACTATATAAACTATTTACAAAGATAGTC	AGATTATACAAGACAAGAATTAACTATATAAACTATTTACAAAGATAGTC	AGATTATACAAGACAAGAATTAACTATATAAACTATTTACAAAGATAGTC	AGATTATACAAGACAAGAATTAACTATATAAACTATTTACAAAGATAGTC	AGATTATACAAGACAAGAATTAACTATATAAACTATTTACAAAGATAGTC	AGATTATACAAGACAAGAATTAACTATATAAACTATTTACAAAGATAGTC	AGATTATACAAGACAAGAATTAACTATATAAACTATTTACAAAGATAGTC	AGATTATACAAGACAAGAATTAACTATATAAACTATTTACAAAGATAGTC
179	CAATTATCATAATATTCAAGAAAACGATAACTAGTGGCTACGTCGCTGAG	CAATTATCATAATATTCAAGAAAACGATAACTAGTGGCTACGTAGCTGAG	CAATTATCATAATATTCAAGAAAACGATAACTAGTGGCTACGTAGCTAAG	CAATTATCATAATATTCAAGAAAACGATAACTAGTAGCTACGTAGCTAAG	CAATTATCATAATATTCAAGAAAACTATAACTAGTAGCTACGTAGCTAAG	CAATTATCATAATATACAAGAAAACTATAACTAGTAGCTACGTAGCTAAG	CAATTATCATAATATACAAGAAAACTATAACAAGTAGCTACGTAGCTAAG	CAATTATCATAATATACAAGAAAACTATTACAAGTAGCTACGTAGCTAAG	AAATTATCATAATATACAAGAAAACTATTACAAGTAGCTACGTAGCTAAG	AGATTATCATAATATACAAGAAAACTATTACAAGTAGCTACGTAGCTAAG	AGATTATCATAATATACAAGAAAACTATTACAAGTAGCTACGAAGCTAAG	AGATTATCATAATATACAAGAAAACTATTACAAGTAGCTACAAAGCTAAG	AGATTATAATAATATACAAGAAAACTATTACAAGTAGCTACAAAGCTAAG	AGATTATAATAATATACAAGAAAACTATTACAAGTAGCTACAAAGATAAG	AGATTATAATAATATACAAGAAAACTATTACAAGTAGCTACAAAGACAAG	AGATTATACTAATATACAAGAAAACTATTACAAGTAGCTACAAAGACAAG	AGATTATACAAATATACAAGAAAACTATTACAAGTAGCTACAAAGACAAG	AGATTATACAAATATACAAGAAAACTATTACAAGAAGCTACAAAGACAAG	AGATTATACAAATATACAAGAAAAGTATTACAAGAAGCTACAAAGACAAG	AGATTATACAAATATACAAGAAAAGTATTACAAGAAACTACAAAGACAAG	AGATTATACAAATATACAAGAAAAGAATTACAAGAAACTACAAAGACAAG	AGATTATACAATTATACAAGAAAAGAATTACAAGAAACTACAAAGACAAG	AGATTATACAATTATACAAGAAAAGAATTACAAGAAACTACAAAGACAAG	AGATTATACAATTATACAAGAAAAGAATTACAAGAAACTACAAAGACAAG	AGATTATACAATTATACAAGAAAAGAATTACAAGAAACTACAAAGACAAG	AGATTATACAATTATACAAGAAAAGAATTACAAGAAACTACAAAGACAAG	AGATTATACAATTATACAAGAAAAGAATTACAAGAAACTACAAAGACAAG	AGATTATACAATTATACAAGAAAAGAATTACAAGAAACTACAAAGACAAG	AGATTATACAATTATACAAGAAAAGAATTACAAGAAACTACAAAGACAAG	AGATTATACAATTATACAAGAAAAGAATTACAAGAAACTACAAAGACAAG	AGATTATACAATTATACAAGAAAAGAATTACAAGAAACTACAAAGACAAG	AGATTATACAATTATACAAGAAAAGAATTACAAGAAACTACAAAGACAAG	AGATTATACAATTATACAAGAAAAGAATTACAAGAAACTACAAAGACAAG	AGATTATACAATTATACAAGAAAAGAATTACAAGAAACTACAAAGACAAG	AGATTATACAATTATACAAGAAAAGAATTACAAGAAACTACAAAGACAAG	AGATTATACAATTATACAAGAAAAGAATTACAAGAAACTACAAAGACAAG	AGATTATACAATTATACAAGAAAAGAATTACAAGAAACTACAAAGACAAG	AGATTATACAATTATACAAGAAAAGAATTACAAGAAACTACAAAGACAAG	AGATTATACAATTATACAAGAAAAGAATTACAAGAAACTACAAAGACAAG	AGATTATACAATTATACAAGAAAAGAATTACAAGAAACTACAAAGACAAG	AGATTATACAATTATACAAGAAAAGAATTACAAGAAACTACAAAGACAAG
180	TGGTAATATGGCGGTAAATAGTGGCCACCGTCCCGGGTGGGTCGCGTAGT	TGGTAATATGGCGGTAAATAATGGCCACCGTCCCGGGTGGGTCGCGTAGT	TGGTAATATCGCGGTAAATAATGGCCACCGTCCCGGGTGGGTCGCGTAGT	TGGTAATATCGCGGTACATAATGGCCACCGTCCCGGGTGGGTCGCGTAGT	TGGTAATATCGCGGTACATAATGGCCACCGTCCCGGGTGAGTCGCGTAGT	TGGTAATATCGCGGTACATAATGGCCACCGTCCCAGGTGAGTCGCGTAGT	TGGTAATATCGCAGTACATAATGGCCACCGTCCCAGGTGAGTCGCGTAGT	TGGTAATATCGCAGTACATAATGACCACCGTCCCAGGTGAGTCGCGTAGT	TGGTAATATCGCAGTACACAATGACCACCGTCCCAGGTGAGTCGCGTAGT	TGGTAATATCGCAGTACACAATGACAACCGTCCCAGGTGAGTCGCGTAGT	TGGTAAAATCGCAGTACACAATGACAACCGTCCCAGGTGAGTCGCGTAGT	TGGTAAAATCGCAGTACACAATGACAACCGTCCCAGGTGAGTCGCATAGT	TGGTAAAATCGCAGTACACAATGACAACCGTTCCAGGTGAGTCGCATAGT	TGGTAAAATCGCAGTACACAATGACAACCGTTCCAGGTAAGTCGCATAGT	TGGTACAATCGCAGTACACAATGACAACCGTTCCAGGTAAGTCGCATAGT	TGGTACAAACGCAGTACACAATGACAACCGTTCCAGGTAAGTCGCATAGT	TGGTACAAACGCAGTACACAATGACAACCGTTCCAGGTAAGTCGCATATT	TGGTACAAACGCAGTACACAATGACAACCGTTCCAGGTAAGACGCATATT	TGGTACAAACGCAGTACACAATGACAACCGTACCAGGTAAGACGCATATT	TGGTACAAACGCAGTACACAATGACAAACGTACCAGGTAAGACGCATATT	TGGTACAAACGCAGTACACAATGACAGACGTACCAGGTAAGACGCATATT	TGGTACAAACGCAGTTCACAATGACAGACGTACCAGGTAAGACGCATATT	TGGTACAAACACAGTTCACAATGACAGACGTACCAGGTAAGACGCATATT	TGGTACAAACACAGTTCACAATGACAGACGTACCAGGTAAGACGCATATG	TGGTACAAACACAGTTCACAATGACAGACGTACCAGGTAAGACGAATATG	AGGTACAAACACAGTTCACAATGACAGACGTACCAGGTAAGACGAATATG	AGATACAAACACAGTTCACAATGACAGACGTACCAGGTAAGACGAATATG	AGATACAAACACAGTTTACAATGACAGACGTACCAGGTAAGACGAATATG	AGATACAAACACAGTTTACAATGACAGACGTACAAGGTAAGACGAATATG	AGATACAAAAACAGTTTACAATGACAGACGTACAAGGTAAGACGAATATG	AGATACAAGAACAGTTTACAATGACAGACGTACAAGGTAAGACGAATATG	AGATACAAGAAAAGTTTACAATGACAGACGTACAAGGTAAGACGAATATG	AGATACAAGAAAAGATTACAATGACAGACGTACAAGGTAAGACGAATATG	AGATACAAGAAAAGATTACAATGAAAGACGTACAAGGTAAGACGAATATG	AGATACAAGAAAAGATTACAAAGAAAGACGTACAAGGTAAGACGAATATG	AGATACAAGAAAAGATTACAAAGAAAGACGTACAAAGTAAGACGAATATG	AGATACAAGAAAAGATTACAAAGAAAGACGTACAAAGCAAGACGAATATG	AGATACAAGAAAAGACTACAAAGAAAGACGTACAAAGCAAGACGAATATG	AGATACAAGAAAAGACTACAAAGAAAGACGTACAAAGCAAGACGAAGATG	AGATACAAGAAAAGACTACAAAGAAAGACGTACAAAGCAAGAAGAAGATG	AGAAACAAGAAAAGACTACAAAGAAAGACGTACAAAGCAAGAAGAAGATG
181	GGAAAATCTTACGGGTCGACACTCTTTCTAGCCGACCAGCCTTAGGCCCA	AGAAAATCTTACGGGTCGACACTCTTTCTAGCCGACCAGCCTTAGGCCCA	AGAAAATCTTACGAGTCGACACTCTTTCTAGCCGACCAGCCTTAGGCCCA	AGAAAATCTTACGAGTCGACACTCTTTCTAGCCGACAAGCCTTAGGCCCA	AGAAAATCTTACGAGTCGACACTCTTTCTAGCCGACAAGACTTAGGCCCA	AGAAAATCTTACGAGTCGACACTCTTTCTAGACGACAAGACTTAGGCCCA	AGAAAATCTTACGAGTCGACACTCTTTCAAGACGACAAGACTTAGGCCCA	AGAAAATCTTACGAGTCGACACTCTTTCAAGACTACAAGACTTAGGCCCA	AGAAAATCTTACGAGTCGACACTATTTCAAGACTACAAGACTTAGGCCCA	AGAAAATCCTACGAGTCGACACTATTTCAAGACTACAAGACTTAGGCCCA	AGAAAATCCTACAAGTCGACACTATTTCAAGACTACAAGACTTAGGCCCA	AGAAAATCCTACAAGTCGACACTATTTCAAGACTACAAGACTTAAGCCCA	AGAAAATCCTACAAGTCGACACTATTACAAGACTACAAGACTTAAGCCCA	AGAAAATCCTACAAGTCTACACTATTACAAGACTACAAGACTTAAGCCCA	AGAAAATCCTACAAGACTACACTATTACAAGACTACAAGACTTAAGCCCA	AGAAAATCCTACAAGACTACACTACTACAAGACTACAAGACTTAAGCCCA	AGAAAATCCTACAAGACTACACTACTACAAGACTACAAGACTTAAGTCCA	AGAAAATCCTACAAGACTACACTACTACAAGACTACAAGAATTAAGTCCA	AGAAAATCCTACAAGACTACACTACTACAAGACTACAAGAATTAAGTACA	AGAAAATCCTACAAGACTACACTACTACAAGACTACAAGAATTAACTACA	AGAAAATCCTACAAGACTACAATACTACAAGACTACAAGAATTAACTACA	AGAAAATCCTACAAGACTACAAAACTACAAGACTACAAGAATTAACTACA	AGAAAATCCTACAAGACTACTAAACTACAAGACTACAAGAATTAACTACA	AGAAAATCCTACAAGACTACTAAACTACAAGACTACAAGATTTAACTACA	AGAAAATCCTACAAGACTACTAAACTACAAGACTACAAAATTTAACTACA	AGAAATTCCTACAAGACTACTAAACTACAAGACTACAAAATTTAACTACA	AGAAATTACTACAAGACTACTAAACTACAAGACTACAAAATTTAACTACA	AGAAATTACTACAAGACTACTAAACTACAAGACTACAAAATTTAACTACT	AGAAATTACTACAAGACTACTAAACTACAAGACTACAAAGTTTAACTACT	AGAAATTACTACAAGACTACTAAACTACAAGACTACAAAGATTAACTACT	AGAAATTACTACAAGACTACTAAACTACAAGACTACAAAGATTTACTACT	AGAAATTACTACAAGACTACTAAACTACAAGACTACAAAGATTTACTACG	AGAAATTACTACAAGACTACTAAACTACAAGACTACAAAGATTTACTACG	AGAAATTACTACAAGACTACTAAACTACAAGACTACAAAGATTTACTACG	AGAAATTACTACAAGACTACTAAACTACAAGACTACAAAGATTTACTACG	AGAAATTACTACAAGACTACTAAACTACAAGACTACAAAGATTTACTACG	AGAAATTACTACAAGACTACTAAACTACAAGACTACAAAGATTTACTACG	AGAAATTACTACAAGACTACTAAACTACAAGACTACAAAGATTTACTACG	AGAAATTACTACAAGACTACTAAACTACAAGACTACAAAGATTTACTACG	AGAAATTACTACAAGACTACTAAACTACAAGACTACAAAGATTTACTACG	AGAAATTACTACAAGACTACTAAACTACAAGACTACAAAGATTTACTACG
182	GCCCATCAAAAATCAAGGAACGCAACTTACTCGTCCTGACGCTATGCGGT	GCCCATCAAAAATCAAGGAACGCAACTTACTCGTCCTGACGCTATTCGGT	GCCCATCAAAAATCAAGGAACGCAACTTACTCGTCATGACGCTATTCGGT	GCCCATCAAAAATCAAGAAACGCAACTTACTCGTCATGACGCTATTCGGT	GTCCATCAAAAATCAAGAAACGCAACTTACTCGTCATGACGCTATTCGGT	GTCCATCAAGAATCAAGAAACGCAACTTACTCGTCATGACGCTATTCGGT	GTCCATCAAGAATCAAGAAACGCAACTTACTCGTCATGACACTATTCGGT	GTCCATCAAGAAACAAGAAACGCAACTTACTCGTCATGACACTATTCGGT	GTCCAACAAGAAACAAGAAACGCAACTTACTCGTCATGACACTATTCGGT	GTCCTACAAGAAACAAGAAACGCAACTTACTCGTCATGACACTATTCGGT	GTCCTACAAGAAACAAGAAACGCAACTTACTCATCATGACACTATTCGGT	GTCCTACAAGAAACAAGAAACGCAACTTACTCATGATGACACTATTCGGT	GTCCTACAAGAAACAAGAAACGCAACTTACTCATGATGACACTATACGGT	GTCCTACAAGAAACAAGAAACGCAACTTACTCATGATGACACTAAACGGT	GTCCTACAAGAAACAAGAAACGCTACTTACTCATGATGACACTAAACGGT	GTCCTACAAGAAACAAGAAAAGCTACTTACTCATGATGACACTAAACGGT	GTCCTACAAGAAACAAGAAAAACTACTTACTCATGATGACACTAAACGGT	GTCCTACAAGAAACAAGAAAAACTACTTATTCATGATGACACTAAACGGT	GTCCTACAAGAAACAAGATAAACTACTTATTCATGATGACACTAAACGGT	GTCCTACAAGAAACAAGATAAACTACTTATACATGATGACACTAAACGGT	GTCCTACAAGAAACAAGATAAACTACTTATACATGATGACACTAAAAGGT	GTCCTACAAGAAACAAGATAAACTACTTATACATGATGACACTACAAGGT	GTCCTACAAGAAACAAGATAAACTACTTATACATGATGAGACTACAAGGT	GTCCTACAAGAAACAAGATAAACTATTTATACATGATGAGACTACAAGGT	GTCCTACAAGAAACAAGATAAACTATATATACATGATGAGACTACAAGGT	GTCCTACAAGAAACAAGATAAACTATATATACAAGATGAGACTACAAGGT	GTCCTACAAGAAACAAGATAAACTATATATACAAGATAAGACTACAAGGT	GTCCTACAAGAAACAAGATAAACTATATATACAAGATAAGACTACAAAGT	GTCCTACAAGAAACAAGATAAACTATATATACAAGACAAGACTACAAAGT	GTCCTACAAGAAACAAGATAAACTATATATATAAGACAAGACTACAAAGT	GTCCTACAAGAAACAAGATAAACTATATATATAAAACAAGACTACAAAGT	GTCCTACAAGAAACAAGATAAACTATATATATAAAACAAGACTACAAAGA	GTCCTACAAGAAACAAGATAAACTATTTATATAAAACAAGACTACAAAGA	GTCCTACAAGAAACAAGATAAACTATTTATATAAAACAAGACTACAAAGA	GTCCTACAAGAAACAAGATAAACTATTTATATAAAACAAGACTACAAAGA	GTCCTACAAGAAACAAGATAAACTATTTATATAAAACAAGACTACAAAGA	GTCCTACAAGAAACAAGATAAACTATTTATATAAAACAAGACTACAAAGA	GTCCTACAAGAAACAAGATAAACTATTTATATAAAACAAGACTACAAAGA	GTCCTACAAGAAACAAGATAAACTATTTATATAAAACAAGACTACAAAGA	GTCCTACAAGAAACAAGATAAACTATTTATATAAAACAAGACTACAAAGA	GTCCTACAAGAAACAAGATAAACTATTTATATAAAACAAGACTACAAAGA
183	TATGTTTTCAGCGGAGTAAAATTGCCATGTCATCGTGGCGGGGGTCAAAC	TGTGTTTTCAGCGGAGTAAAATTGCCATGTCATCGTGGCGGGGGTCAAAC	TGTGTTTTCAGCGGAGTAAAATGGCCATGTCATCGTGGCGGGGGTCAAAC	TGTGTTTTCAGCGGAGTAAAATGACCATGTCATCGTGGCGGGGGTCAAAC	TGTGTTTTCAGCGGAGTAAAATGACCATGTCATCGTGGCGCGGGTCAAAC	TGTGTTTTCAGCGGAGTAAAATGACCAAGTCATCGTGGCGCGGGTCAAAC	TGTGTTTTCAGCGGAGAAAAATGACCAAGTCATCGTGGCGCGGGTCAAAC	TGTGTTTTCAGCGGAGAAAAATGACCAAGTCATCGTGGCACGGGTCAAAC	TGTGTTTTCAGCAGAGAAAAATGACCAAGTCATCGTGGCACGGGTCAAAC	TGTGTTTTCAGCAGAGAAAAATGACCAAGTCATCGTGGCACGGTTCAAAC	TGTGTTTTCAACAGAGAAAAATGACCAAGTCATCGTGGCACGGTTCAAAC	TGTGTTTTCAACAGAGAAAAATGACCAAGTCATCCTGGCACGGTTCAAAC	TGTGTTTTCAACAGAGAAAAATGACCAAGTTATCCTGGCACGGTTCAAAC	TGTGTTCTCAACAGAGAAAAATGACCAAGTTATCCTGGCACGGTTCAAAC	TGTGTTCTCAACAGAGAACAATGACCAAGTTATCCTGGCACGGTTCAAAC	TGTGTTCTCAACAGAGAACAATGACAAAGTTATCCTGGCACGGTTCAAAC	TGTGTTCTCAACAGAGAACAATGACAAATTTATCCTGGCACGGTTCAAAC	TGTGTTCTCAACAGAGAACAATGAGAAATTTATCCTGGCACGGTTCAAAC	TGTGTTCTCAACAGAGAACAATGAGAAATTTATCCTGGCACTGTTCAAAC	TGTGTTCTCAACAGAGAACAATGAGAAATTTATCCTGGCACTGTACAAAC	TGTGTTCTCAACAGAGAACAATGAGAAATCTATCCTGGCACTGTACAAAC	TGAGTTCTCAACAGAGAACAATGAGAAATCTATCCTGGCACTGTACAAAC	TGAGATCTCAACAGAGAACAATGAGAAATCTATCCTGGCACTGTACAAAC	TGAGATCTCAACCGAGAACAATGAGAAATCTATCCTGGCACTGTACAAAC	TGAGATCTCAAGCGAGAACAATGAGAAATCTATCCTGGCACTGTACAAAC	TGAGATCTCAAGCAAGAACAATGAGAAATCTATCCTGGCACTGTACAAAC	TGAGATCGCAAGCAAGAACAATGAGAAATCTATCCTGGCACTGTACAAAC	TGACATCGCAAGCAAGAACAATGAGAAATCTATCCTGGCACTGTACAAAC	TGACATCGCAAGCAAGAACAATGAGAAATCTATACTGGCACTGTACAAAC	TGACATCGCAAGCAAGAACAATGAGAAATCTATACTGGCACTGTACAAAG	TGACATCGCAAGCAAGAACAATGAGAAATCTATACTGGAACTGTACAAAG	TGACATCGCAAGCAAGAACAATGAGAAATCTATACTGGAACGGTACAAAG	TGACATCGCAAGCAAGAACAATGAGAAATCTATACAGGAACGGTACAAAG	TGACATCGCAAGCAAGAACAATGAGAAATCTATACAAGAACGGTACAAAG	AGACATCGCAAGCAAGAACAATGAGAAATCTATACAAGAACGGTACAAAG	AGACATTGCAAGCAAGAACAATGAGAAATCTATACAAGAACGGTACAAAG	AGACATTACAAGCAAGAACAATGAGAAATCTATACAAGAACGGTACAAAG	AGAAATTACAAGCAAGAACAATGAGAAATCTATACAAGAACGGTACAAAG	AGAAATTACAAGCAAGAACAATGAGAAATCTATACAAGAAAGGTACAAAG	AGAAATTACAAGCAAGAACAATGAGAAATCTATACAAGACAGGTACAAAG	AGAAATTACAAGCAAGAACAATGAGAAATCTATACAAGACAAGTACAAAG
184	GCTACACGTAAAGCGCCTCGGCGACATGGAGTGTACGTCCAAACGCGTGG	GCTACACGTAAAGCGCCTCGGCGACATAGAGTGTACGTCCAAACGCGTGG	GCTACACGTAAAGCGCCTCGGCGACATAGAGTGTACGTCCAAACGCGAGG	GCTACACGTAAAGCGCCTCGGCGACATAGAGTGTACGTCCAAACGCAAGG	GCTACAAGTAAAGCGCCTCGGCGACATAGAGTGTACGTCCAAACGCAAGG	GCTACAAGTAAAGCGCCTCGACGACATAGAGTGTACGTCCAAACGCAAGG	GCTACAAGTAAAGCGCCTCGACTACATAGAGTGTACGTCCAAACGCAAGG	GCTACAAGTAAAGCGCCTCGACTACATAGAGTGTACGTACAAACGCAAGG	GCTACAAGTAAAGCGCCTCGACTACATAGAGAGTACGTACAAACGCAAGG	GCTACAAGTAAAGCGCCTCGACTACATAGAAAGTACGTACAAACGCAAGG	GCTACAAGTAAAGCGCCTCGACTACATACAAAGTACGTACAAACGCAAGG	GCTACAAGTAAAGCGCCTCGACTACATACAAAGTACTTACAAACGCAAGG	GCTACAAGTAAAGCGCCTCGACTACATACAAAGTACTTACAAACGCAAGA	GCTACAAGTAAAGCGCATCGACTACATACAAAGTACTTACAAACGCAAGA	GCTACAAGTAAAGCGCATCGACTACATACAAAGTACTTACAAACTCAAGA	GCTACAAGTAAAGCGCATCGACTACATACAAAGTACTTACAAAGTCAAGA	GCTACAAGTAAAGCGCATCGACTACATACAAATTACTTACAAAGTCAAGA	TCTACAAGTAAAGCGCATCGACTACATACAAATTACTTACAAAGTCAAGA	TCTACAAGTAAAGCGCATCGACTATATACAAATTACTTACAAAGTCAAGA	TCTACAAGTAAAGCGCATCAACTATATACAAATTACTTACAAAGTCAAGA	TCTACAAGTAAAGCGCATCAACTATATACAAATTATTTACAAAGTCAAGA	TCTACAAGTAAAGCGCATCAACTATATACAAATTATTTACAAAGACAAGA	TCTACAAGTAAAGCGTATCAACTATATACAAATTATTTACAAAGACAAGA	TCTACAAGTCAAGCGTATCAACTATATACAAATTATTTACAAAGACAAGA	TCTACAAGTCAAGCGTATAAACTATATACAAATTATTTACAAAGACAAGA	TCTACAAGTCAAGCCTATAAACTATATACAAATTATTTACAAAGACAAGA	TCTACAAGTCAAGACTATAAACTATATACAAATTATTTACAAAGACAAGA	TCTACAAGTCAAGACTATAAACTATATATAAATTATTTACAAAGACAAGA	TATACAAGTCAAGACTATAAACTATATATAAATTATTTACAAAGACAAGA	TATACAAGTCAAGACTATAAACTATATATAAACTATTTACAAAGACAAGA	TATACAAGACAAGACTATAAACTATATATAAACTATTTACAAAGACAAGA	TATACAAGACAAGACTATAAAATATATATAAACTATTTACAAAGACAAGA	TATACAAGACAAGACTATAAAATATATATAAACTATTTACAAAGACAAGA	TATACAAGACAAGACTATAAAATATATATAAACTATTTACAAAGACAAGA	TATACAAGACAAGACTATAAAATATATATAAACTATTTACAAAGACAAGA	TATACAAGACAAGACTATAAAATATATATAAACTATTTACAAAGACAAGA	TATACAAGACAAGACTATAAAATATATATAAACTATTTACAAAGACAAGA	TATACAAGACAAGACTATAAAATATATATAAACTATTTACAAAGACAAGA	TATACAAGACAAGACTATAAAATATATATAAACTATTTACAAAGACAAGA	TATACAAGACAAGACTATAAAATATATATAAACTATTTACAAAGACAAGA	TATACAAGACAAGACTATAAAATATATATAAACTATTTACAAAGACAAGA
185	TACAGGAACTCATGAAACCGGATCGGGGCTCAGGCAGTACGGTGCCCACA	TACAGGAACTCATGAAACCGGATCGAGGCTCAGGCAGTACGGTGCCCACA	TACAGGAACTCATGAAACCGGATCGAGACTCAGGCAGTACGGTGCCCACA	TACAGGAACTCATGAAACCGGATCAAGACTCAGGCAGTACGGTGCCCACA	TACAGGAACTCATGAAACCGGATCAAGACTCAAGCAGTACGGTGCCCACA	TACAAGAACTCATGAAACCGGATCAAGACTCAAGCAGTACGGTGCCCACA	TACAAGAACTCATGAAACCGGATCAAGACTCAAGAAGTACGGTGCCCACA	TACAAGAACTCATGAAACCGGATCAAGACTCAAGAAGTACAGTGCCCACA	TACAAGAACTCATGAAACCGGATCAAGACTCAAGAAGTACAGTGCCTACA	TACAAGAAATCATGAAACCGGATCAAGACTCAAGAAGTACAGTGCCTACA	TACAAGAAATTATGAAACCGGATCAAGACTCAAGAAGTACAGTGCCTACA	TACAAGAAATTATGAAACCGGATCAAGACTCAAGAATTACAGTGCCTACA	TACAAGAAATTATGAAACCGGATCAAGACTCAAGAATTACAGTGACTACA	TACAAGAAATTATGAAACCGGATCAAGACTCAAGAATTACAGTAACTACA	TACAAGAAATTATGAAACCGGATCAAGACACAAGAATTACAGTAACTACA	TACAAGAAATTATGAAATCGGATCAAGACACAAGAATTACAGTAACTACA	TACAAGAAATTATGAAATCGCATCAAGACACAAGAATTACAGTAACTACA	TACAAGAAATTATGAAATCGCATCAAGACACAAGAATTACAATAACTACA	TACAAGAAATTATGAAATCGCATCAAGACACAAGAATTACAAGAACTACA	TACAAAAAATTATGAAATCGCATCAAGACACAAGAATTACAAGAACTACA	TACAAAGAATTATGAAATCGCATCAAGACACAAGAATTACAAGAACTACA	TACAAAGAATTATGAAATCGCATCAAGACACAAGACTTACAAGAACTACA	TACAAAGAAATATGAAATCGCATCAAGACACAAGACTTACAAGAACTACA	TACAAAGAAAGATGAAATCGCATCAAGACACAAGACTTACAAGAACTACA	TACAAAGCAAGATGAAATCGCATCAAGACACAAGACTTACAAGAACTACA	TACAAAGCAAGATGAAATCGCATCAAGACACAAGACTTACAAGAACTACA	TACAAAGCAAGATGAAATCGCATCAAGACACAAGACTTACAAGAACTACA	TACAAAGCAAGATGAAATCGCATCAAGACACAAGACTTACAAGAACTACA	TACAAAGCAAGATGAAATCGCATCAAGACACAAGACTTACAAGAACTACA	TACAAAGCAAGATGAAATCGCATCAAGACACAAGACTTACAAGAACTACA	TACAAAGCAAGATGAAATCGCATCAAGACACAAGACTTACAAGAACTACA	TACAAAGCAAGATGAAATCGCATCAAGACACAAGACTTACAAGAACTACA	TACAAAGCAAGATGAAATCGCATCAAGACACAAGACTTACAAGAACTACA	TACAAAGCAAGATGAAATCGCATCAAGACACAAGACTTACAAGAACTACA	TACAAAGCAAGATGAAATCGCATCAAGACACAAGACTTACAAGAACTACA	TACAAAGCAAGATGAAATCGCATCAAGACACAAGACTTACAAGAACTACA	TACAAAGCAAGATGAAATCGCATCAAGACACAAGACTTACAAGAACTACA	TACAAAGCAAGATGAAATCGCATCAAGACACAAGACTTACAAGAACTACA	TACAAAGCAAGATGAAATCGCATCAAGACACAAGACTTACAAGAACTACA	TACAAAGCAAGATGAAATCGCATCAAGACACAAGACTTACAAGAACTACA	TACAAAGCAAGATGAAATCGCATCAAGACACAAGACTTACAAGAACTACA
186	TACGGTTGAGTCTTGCTTATTTACTCGCGGTCGCCTAAAACGGGGACAAC	TACGGTTGAGTCTTGCTTATTTACTCGCGGTCGCCTAAAACGAGGACAAC	TACGGTTGAGTCTTACTTATTTACTCGCGGTCGCCTAAAACGAGGACAAC	TACGGTTGAGTCTTACTTATTTACTCGCGGTCGCCTAAAACGAGGACAAG	TACGGTTGAGTCTTACTTATTTACTCGCGGTCGCCTAAAACGAAGACAAG	TACGGTTGAGTATTACTTATTTACTCGCGGTCGCCTAAAACGAAGACAAG	TACGGTTCAGTATTACTTATTTACTCGCGGTCGCCTAAAACGAAGACAAG	TACGGTTCAGTATTACTTATTTACTCGCGGTCGCCTAAAACTAAGACAAG	TACGGTTCAGTATTACTTATTTACTCGCGGTCGCATAAAACTAAGACAAG	TACGGTTCAGTATTACTTATTTACTCGCGGTCGTATAAAACTAAGACAAG	TACGGTTCAGTATTACTTATTTACTCGCGGTCCTATAAAACTAAGACAAG	TACGGTTCAGTATTACTTATTTACTCGCAGTCCTATAAAACTAAGACAAG	TACGGTTCAGTATTACTTATTTACTAGCAGTCCTATAAAACTAAGACAAG	TACGGTTCAGTATTACTTATTTACTAGAAGTCCTATAAAACTAAGACAAG	TACGGTTCAGTATTACTTATTTACTACAAGTCCTATAAAACTAAGACAAG	TACGGTTCAATATTACTTATTTACTACAAGTCCTATAAAACTAAGACAAG	TACGGTTCAAGATTACTTATTTACTACAAGTCCTATAAAACTAAGACAAG	TACGATTCAAGATTACTTATTTACTACAAGTCCTATAAAACTAAGACAAG	TAAGATTCAAGATTACTTATTTACTACAAGTCCTATAAAACTAAGACAAG	TAAGATTCAAGATTACTTATTTACTACAAGTCCTACAAAACTAAGACAAG	TAAGATTCAAGATTACTTATTTACTACAAGTACTACAAAACTAAGACAAG	TAAGACTCAAGATTACTTATTTACTACAAGTACTACAAAACTAAGACAAG	TAAGACTCAAGATTACATATTTACTACAAGTACTACAAAACTAAGACAAG	CAAGACTCAAGATTACATATTTACTACAAGTACTACAAAACTAAGACAAG	CAAGACACAAGATTACATATTTACTACAAGTACTACAAAACTAAGACAAG	CAAGACACAAGATTACATATTTACTACAAGAACTACAAAACTAAGACAAG	CAAGACACAAGATTACATATTTACTACAAGAACTACAAGACTAAGACAAG	CAAGACACAAGATTATATATTTACTACAAGAACTACAAGACTAAGACAAG	CAAGACACAAGACTATATATTTACTACAAGAACTACAAGACTAAGACAAG	CAAGACACAAAACTATATATTTACTACAAGAACTACAAGACTAAGACAAG	CAAGACACTAAACTATATATTTACTACAAGAACTACAAGACTAAGACAAG	CAAGACACTAAACTATATATTTACTACAAGAACTACAAGACTAAGACAAG	CAAGACACTAAACTATATATTTACTACAAGAACTACAAGACTAAGACAAG	CAAGACACTAAACTATATATTTACTACAAGAACTACAAGACTAAGACAAG	CAAGACACTAAACTATATATTTACTACAAGAACTACAAGACTAAGACAAG	CAAGACACTAAACTATATATTTACTACAAGAACTACAAGACTAAGACAAG	CAAGACACTAAACTATATATTTACTACAAGAACTACAAGACTAAGACAAG	CAAGACACTAAACTATATATTTACTACAAGAACTACAAGACTAAGACAAG	CAAGACACTAAACTATATATTTACTACAAGAACTACAAGACTAAGACAAG	CAAGACACTAAACTATATATTTACTACAAGAACTACAAGACTAAGACAAG	CAAGACACTAAACTATATATTTACTACAAGAACTACAAGACTAAGACAAG
187	GAAAGTGTAACCAATCAGAGCCTCGTATCGCATACTAATCCGCTCATTCG	GAAAGTGTAACCAATCAGAGCCTCGTATCGCATACTAATCCGCTAATTCG	GAAAGTGTAACCAATCAGAGCCTCGTATCGCATACTAATCCGCTAATACG	GAAAGTGTAACCAATCAGAGCCTCGTATCGCATACTAATCCGCTACTACG	GAAAGTGTAACCAATCAAAGCCTCGTATCGCATACTAATCCGCTACTACG	GAAAGTGTAACCAATCAAAGCCTCGTATCGCATACTAATCAGCTACTACG	GAAAGTGTAACCAATCAAAGCCTCGTATCGCATACTAATCAACTACTACG	GAAAGTGTAACCAATCAAAGCCTCGTATCGCATACTACTCAACTACTACG	GAAAGTGTAACCAATCAAAGCCTCGTATCGCATACTACACAACTACTACG	GAAAGTGTAACCAATCAAAGCCTCGTATCGCATACTACAAAACTACTACG	AAAAGTGTAACCAATCAAAGCCTCGTATCGCATACTACAAAACTACTACG	AGAAGTGTAACCAATCAAAGCCTCGTATCGCATACTACAAAACTACTACG	AGAAGTATAACCAATCAAAGCCTCGTATCGCATACTACAAAACTACTACG	AGAAGTACAACCAATCAAAGCCTCGTATCGCATACTACAAAACTACTACG	AGAAGTACAAACAATCAAAGCCTCGTATCGCATACTACAAAACTACTACG	AGAAGTACATACAATCAAAGCCTCGTATCGCATACTACAAAACTACTACG	AGAAGTACATACAAGCAAAGCCTCGTATCGCATACTACAAAACTACTACG	AGAAGTACATACAAGAAAAGCCTCGTATCGCATACTACAAAACTACTACG	AGAATTACATACAAGAAAAGCCTCGTATCGCATACTACAAAACTACTACG	AGAATTACATACAAGAAAAGCCTCGTATCGAATACTACAAAACTACTACG	AGAATTACATACAAGAAAAGCCTCGTATCGAAAACTACAAAACTACTACG	AGAATTACATACAAGAAAAGCCTCGTATAGAAAACTACAAAACTACTACG	AGAATTACATACAAGAAAAGCCTCGTATACAAAACTACAAAACTACTACG	AGAATTACATACAAGAAAAGCCTCGTATACAAGACTACAAAACTACTACG	AGAATTACATACAAGAAAAGTCTCGTATACAAGACTACAAAACTACTACG	AGAATTACATACAAGAAAAGTCTCTTATACAAGACTACAAAACTACTACG	AGAATTACATACAAGAAAAGTCTATTATACAAGACTACAAAACTACTACG	AGAATTACATACAAGACAAGTCTATTATACAAGACTACAAAACTACTACG	AGAATTACATACAAGACAAGACTATTATACAAGACTACAAAACTACTACG	AGAATTACATACAAGACAAGACAATTATACAAGACTACAAAACTACTACG	AGAATTACATACAAGACAAGACAATTATACAAGACTACAAAACTACTAAG	AGAATTACATACAAGACAAGACAATTATACAAGACTACAAGACTACTAAG	AGAATTACATACAAGACAAGACAATTATACAAGACTACAAGACTACAAAG	AGAATTACATACAAGACAAGACAATTATACAAGACTACAAGACTACAAAG	AGAATTACATACAAGACAAGACAATTATACAAGACTACAAGACTACAAAG	AGAATTACATACAAGACAAGACAATTATACAAGACTACAAGACTACAAAG	AGAATTACATACAAGACAAGACAATTATACAAGACTACAAGACTACAAAG	AGAATTACATACAAGACAAGACAATTATACAAGACTACAAGACTACAAAG	AGAATTACATACAAGACAAGACAATTATACAAGACTACAAGACTACAAAG	AGAATTACATACAAGACAAGACAATTATACAAGACTACAAGACTACAAAG	AGAATTACATACAAGACAAGACAATTATACAAGACTACAAGACTACAAAG
[truncated: 4,812 more rows]
