# Supplementary material for: Deep learning of the regulatory grammar of yeast 5′ untranslated regions from 500,000 random sequences
Source: HighWire-hosted journal article supplement (doi:10.1101/gr.224964.117), 2017-11-02
Supplement: Supplemental_Table_S8.xlsx [file Supplemental_Table_S8.xlsx]

## Sheet: evolved_random_seqs_5000_40rnds
In silico evolutions of 5,000 random sequences, predicted enrichment scores (Log2)
	Steps ->
UTR	0	1	2	3	4	5	6	7	8	9	10	11	12	13	14	15	16	17	18	19	20	21	22	23	24	25	26	27	28	29	30	31	32	33	34	35	36	37	38	39	40
0	-1.07076	0.869608	1.0463	1.23727	1.42941	1.75266	1.93474	2.1322	2.25827	2.41536	2.56103	2.69295	2.78751	2.86635	2.92983	2.99331	3.06154	3.10895	3.34798	3.4246	3.4641	3.47616	3.56991	3.58427	3.62232	3.65027	3.68009	3.70801	3.73286	3.73286	3.73286	3.73286	3.73286	3.73286	3.73286	3.73286	3.73286	3.73286	3.73286	3.73286	3.73286
1	-1.38733	-0.952899	0.174936	0.507637	0.694802	0.946445	1.12698	1.36267	1.58225	1.76451	1.99209	2.176	2.3468	2.45515	2.57276	2.70621	2.89667	3.10846	3.27725	3.42045	3.51062	3.8245	3.8709	3.89468	3.95231	4.01372	4.02291	4.05844	4.05844	4.05844	4.05844	4.05844	4.05844	4.05844	4.05844	4.05844	4.05844	4.05844	4.05844	4.05844	4.05844
2	0.297467	0.716541	1.01788	1.22929	1.35728	1.48351	1.59349	1.70741	1.81101	1.88381	2.0156	2.11396	2.19057	2.52997	2.61869	2.67548	2.81437	2.90111	3.01398	3.28193	3.41213	3.5286	3.5767	3.61277	3.62805	3.72151	3.78929	3.79649	3.79649	3.79649	3.79649	3.79649	3.79649	3.79649	3.79649	3.79649	3.79649	3.79649	3.79649	3.79649	3.79649
3	-1.51261	-1.11129	0.740867	1.00159	1.24288	1.4681	1.64004	1.76013	1.90962	2.09224	2.19061	2.31224	2.44685	2.53962	2.61124	2.66887	2.73833	2.92307	2.98312	2.98608	3.02138	3.02138	3.02138	3.02138	3.02138	3.02138	3.02138	3.02138	3.02138	3.02138	3.02138	3.02138	3.02138	3.02138	3.02138	3.02138	3.02138	3.02138	3.02138	3.02138	3.02138
4	0.23843	0.718405	0.999251	1.21412	1.38898	1.58058	1.7032	1.78531	1.94087	2.03158	2.16069	2.3882	2.49127	2.60257	2.69911	2.79024	2.91694	3.00944	3.08458	3.15219	3.20622	3.38808	3.45944	3.51121	3.5489	3.57972	3.6064	3.63186	3.67311	3.69466	3.71928	3.71928	3.71928	3.71928	3.71928	3.71928	3.71928	3.71928	3.71928	3.71928	3.71928
5	-1.4292	-1.07676	-0.803731	-0.190809	0.0622316	0.302877	0.470317	0.592386	0.691791	0.77641	0.914687	1.0523	1.19648	1.26677	1.33207	1.38957	1.55518	1.68689	1.78638	2.00239	2.10681	2.22302	2.33568	2.51366	2.71228	2.77323	2.87286	2.90736	2.90777	3.02375	3.25139	3.4106	3.49375	3.55018	3.60328	3.66523	3.72826	3.73475	3.8304	3.85676	3.88693
6	0.226072	0.556746	0.841629	1.11844	1.38875	1.6356	1.85681	2.24694	2.43917	2.60546	2.76553	2.92835	3.08836	3.23107	3.36602	3.42801	3.48737	3.54199	3.61923	3.72937	3.7622	3.79087	3.80747	3.82311	3.82311	3.82311	3.82311	3.82311	3.82311	3.82311	3.82311	3.82311	3.82311	3.82311	3.82311	3.82311	3.82311	3.82311	3.82311	3.82311	3.82311
7	0.682343	1.23765	1.52419	1.7412	1.91033	2.1043	2.26786	2.46335	2.63639	2.76326	2.87618	2.96818	3.05535	3.14289	3.24039	3.31036	3.37877	3.44742	3.51557	3.5648	3.64118	3.71452	3.75548	3.78759	3.78759	3.78759	3.78759	3.78759	3.78759	3.78759	3.78759	3.78759	3.78759	3.78759	3.78759	3.78759	3.78759	3.78759	3.78759	3.78759	3.78759
8	-1.40719	-0.776884	-0.200289	0.114403	0.386769	0.550086	0.753826	0.891956	1.24383	1.40796	1.56314	1.68467	1.78469	1.92772	2.04111	2.16376	2.22122	2.30744	2.32863	2.44132	2.57318	2.60691	2.70147	2.75666	2.80735	2.84382	2.9218	2.96303	2.98612	3.01951	3.04951	3.10193	3.11694	3.15298	3.30211	3.3153	3.37803	3.41472	3.48544	3.53627	3.58859
9	-1.39596	-0.0773277	0.34484	0.719432	1.05718	1.28079	1.49217	1.69482	1.90726	2.07687	2.37359	2.56629	2.6632	2.90575	3.06057	3.15189	3.2529	3.30974	3.37777	3.42733	3.45999	3.54433	3.60134	3.60863	3.65276	3.71898	3.72905	3.78105	3.81988	3.89648	3.90824	3.95443	3.97529	4.10766	4.10766	4.10766	4.10766	4.10766	4.10766	4.10766	4.10766
10	-0.773941	-0.134109	0.479106	0.744721	0.950356	1.13323	1.40734	1.56067	1.66146	1.9086	2.12799	2.33437	2.42071	2.55603	2.71635	2.77448	2.84485	2.9221	2.96645	3.00672	3.04218	3.1191	3.16354	3.21271	3.24363	3.32861	3.33907	3.37258	3.56076	3.60169	3.63773	3.63773	3.63773	3.63773	3.63773	3.63773	3.63773	3.63773	3.63773	3.63773	3.63773
11	-1.56809	-1.22128	0.12546	1.09895	1.43152	1.5857	1.76495	1.96348	2.11521	2.32788	2.50119	2.65297	2.78166	2.9102	2.99525	3.10669	3.34035	3.41159	3.46933	3.57145	3.59542	3.7968	3.81366	3.88048	3.92761	3.94751	4.01839	4.0685	4.19267	4.22009	4.22009	4.22009	4.22009	4.22009	4.22009	4.22009	4.22009	4.22009	4.22009	4.22009	4.22009
12	-0.924996	0.570532	0.842893	1.05246	1.28869	1.45439	1.64126	1.79621	1.95037	2.10679	2.27016	2.43654	2.58359	2.80454	2.9179	3.0166	3.11154	3.23242	3.29089	3.34471	3.51763	3.63055	3.66149	3.6846	3.69214	3.69214	3.69214	3.69214	3.69214	3.69214	3.69214	3.69214	3.69214	3.69214	3.69214	3.69214	3.69214	3.69214	3.69214	3.69214	3.69214
13	-0.0742224	0.499917	0.815627	1.07076	1.26148	1.46336	1.5987	1.71677	1.82245	1.93665	2.121	2.32473	2.44276	2.58144	2.69502	2.76296	2.85414	2.92755	2.99294	3.07177	3.17268	3.26009	3.29305	3.32331	3.32331	3.32331	3.32331	3.32331	3.32331	3.32331	3.32331	3.32331	3.32331	3.32331	3.32331	3.32331	3.32331	3.32331	3.32331	3.32331	3.32331
14	-1.3167	-0.723911	0.184018	0.381715	0.609593	0.851019	1.09525	1.29726	1.47449	1.70089	1.81984	1.90554	2.00816	2.27934	2.40402	2.53703	2.65993	2.79568	2.84565	2.93488	3.01673	3.15781	3.21228	3.23467	3.34704	3.34861	3.34861	3.34861	3.34861	3.34861	3.34861	3.34861	3.34861	3.34861	3.34861	3.34861	3.34861	3.34861	3.34861	3.34861	3.34861
15	-0.0449217	0.365121	0.775084	1.02605	1.25588	1.45098	1.73348	1.8853	2.07789	2.2197	2.31589	2.5053	2.57565	2.68543	2.78601	2.97048	3.09365	3.13344	3.26386	3.31577	3.35607	3.48215	3.55775	3.58971	3.73666	3.77885	3.81238	3.83114	3.94064	3.98743	4.00601	4.01663	4.0228	4.0256	4.0256	4.0256	4.0256	4.0256	4.0256	4.0256	4.0256
16	-0.436304	-0.0347377	0.290353	0.613981	0.876633	1.11941	1.36278	1.53807	1.73411	1.92328	2.0684	2.24737	2.3705	2.54443	2.72021	2.85972	3.02762	3.17935	3.3253	3.47784	3.62562	3.75965	3.81178	3.85497	3.88476	3.90744	3.94117	3.96422	3.96925	3.96925	3.96925	3.96925	3.96925	3.96925	3.96925	3.96925	3.96925	3.96925	3.96925	3.96925	3.96925
17	-1.57	-0.107083	1.06457	1.31862	1.52364	1.81156	1.96869	2.12018	2.2721	2.6025	2.74568	2.84948	2.95078	3.03449	3.13925	3.2168	3.23753	3.31408	3.43664	3.50656	3.55249	3.65712	3.68333	3.68333	3.68333	3.68333	3.68333	3.68333	3.68333	3.68333	3.68333	3.68333	3.68333	3.68333	3.68333	3.68333	3.68333	3.68333	3.68333	3.68333	3.68333
18	-0.849244	0.0626599	0.452607	0.679274	0.886356	1.03036	1.21445	1.34164	1.48854	1.6119	1.72021	1.86258	1.9727	2.08408	2.26346	2.41027	2.56894	2.67542	2.75557	2.85138	2.95922	3.06757	3.14787	3.30589	3.36755	3.41438	3.51362	3.63824	3.74544	3.74544	3.74544	3.74544	3.74544	3.74544	3.74544	3.74544	3.74544	3.74544	3.74544	3.74544	3.74544
19	0.279927	0.591259	0.756325	0.91185	1.06304	1.24916	1.39776	1.63789	1.78297	1.9349	2.14772	2.28838	2.41298	2.52428	2.61586	2.75246	2.78574	2.83255	2.89888	2.93589	2.95563	3.03853	3.1148	3.19085	3.2952	3.39416	3.49894	3.61469	3.69488	3.70551	3.75781	3.79088	3.82572	3.91022	3.91037	3.91037	3.91037	3.91037	3.91037	3.91037	3.91037
20	-1.20675	0.189932	0.611249	0.864946	1.09903	1.35083	1.59046	1.82743	2.03807	2.2541	2.46385	2.63503	2.78152	2.98283	3.09181	3.18657	3.35879	3.41988	3.46624	3.52913	3.57411	3.58275	3.62615	3.7927	3.86566	3.86959	3.88936	3.93389	3.986	3.99863	3.99863	3.99863	3.99863	3.99863	3.99863	3.99863	3.99863	3.99863	3.99863	3.99863	3.99863
21	-0.991926	0.463493	0.847242	1.14303	1.36812	1.59243	1.75582	1.89851	2.09023	2.33135	2.47864	2.6106	2.73765	2.85674	2.9842	3.1455	3.28173	3.40036	3.52493	3.64697	3.74432	3.77514	3.78606	3.88713	3.9807	3.9807	3.9807	3.9807	3.9807	3.9807	3.9807	3.9807	3.9807	3.9807	3.9807	3.9807	3.9807	3.9807	3.9807	3.9807	3.9807
22	-1.32448	1.03005	1.27187	1.53439	1.73819	1.90336	2.03866	2.18087	2.34162	2.47397	2.62098	2.75509	2.91417	3.03802	3.17537	3.25661	3.37629	3.47064	3.53256	3.5951	3.66686	3.75755	3.82209	3.84075	3.86714	3.87865	4.0317	4.03894	4.11733	4.13344	4.24565	4.27791	4.27791	4.27791	4.27791	4.27791	4.27791	4.27791	4.27791	4.27791	4.27791
23	-1.03371	-0.063612	0.51192	0.781424	1.02916	1.38416	1.55523	1.90522	2.07882	2.27805	2.40589	2.60946	2.76202	2.94051	3.03915	3.17685	3.2852	3.43801	3.50872	3.54514	3.56261	3.59152	3.63508	3.68854	3.77671	3.83486	3.85957	3.85957	3.85957	3.85957	3.85957	3.85957	3.85957	3.85957	3.85957	3.85957	3.85957	3.85957	3.85957	3.85957	3.85957
24	-0.563667	0.611934	0.871796	1.04684	1.20685	1.36353	1.53371	1.69317	1.86837	2.00061	2.13013	2.21825	2.38217	2.54585	2.72523	2.77861	2.8489	2.90336	2.94399	2.97642	3.00578	3.07688	3.11374	3.15572	3.2202	3.27677	3.30401	3.38345	3.42924	3.44521	3.53508	3.5898	3.62539	3.65494	3.65494	3.65494	3.65494	3.65494	3.65494	3.65494	3.65494
25	-1.23976	-0.900727	0.0589866	0.740267	1.02815	1.2022	1.31958	1.4455	1.5752	1.68627	1.75152	1.86116	1.9557	2.05138	2.12225	2.22437	2.31944	2.39342	2.56684	2.64051	2.71002	2.78676	2.882	2.91996	2.9555	3.01382	3.20198	3.38782	3.44611	3.57971	3.69812	3.77327	3.7821	3.82107	3.82107	3.82107	3.82107	3.82107	3.82107	3.82107	3.82107
26	0.185386	0.679317	0.999041	1.3103	1.57144	1.85936	2.10531	2.24527	2.39977	2.53032	2.77005	2.88664	2.9368	2.97593	3.05108	3.10686	3.20996	3.46434	3.57767	3.79365	3.98687	4.25781	4.28712	4.28712	4.28712	4.28712	4.28712	4.28712	4.28712	4.28712	4.28712	4.28712	4.28712	4.28712	4.28712	4.28712	4.28712	4.28712	4.28712	4.28712	4.28712
27	-1.30273	-0.541939	-0.134906	0.182609	0.416547	0.584276	0.737078	0.867532	1.08535	1.31755	1.49149	1.61719	1.81916	1.99612	2.1758	2.38694	2.51697	2.63939	2.74115	2.81646	2.9057	2.96946	2.9998	3.05221	3.0725	3.0757	3.09098	3.10068	3.10068	3.10068	3.10068	3.10068	3.10068	3.10068	3.10068	3.10068	3.10068	3.10068	3.10068	3.10068	3.10068
28	0.0106316	0.530577	0.89522	1.11296	1.3358	1.55424	1.78591	1.92166	2.07599	2.15805	2.37382	2.53329	2.6064	2.7138	2.84282	2.93882	3.05468	3.33344	3.42537	3.47504	3.52853	3.6266	3.63247	3.9812	3.9812	3.9812	3.9812	3.9812	3.9812	3.9812	3.9812	3.9812	3.9812	3.9812	3.9812	3.9812	3.9812	3.9812	3.9812	3.9812	3.9812
29	-0.731107	-0.440072	-0.110045	0.234111	0.430754	0.704402	0.914053	1.11442	1.28702	1.51069	1.67026	1.80312	1.93135	2.05338	2.26053	2.46091	2.60965	2.74136	2.96733	3.06433	3.24224	3.33895	3.44345	3.53635	3.61914	3.64578	3.67278	3.93635	4.00647	4.03813	4.0433	4.04996	4.04996	4.04996	4.04996	4.04996	4.04996	4.04996	4.04996	4.04996	4.04996
30	0.433431	0.805425	1.05263	1.437	1.65223	1.88324	2.06192	2.26926	2.45715	2.62701	2.84523	2.9353	3.0396	3.13982	3.31129	3.44174	3.51319	3.62137	3.89728	4.00836	4.0575	4.07067	4.07067	4.07067	4.07067	4.07067	4.07067	4.07067	4.07067	4.07067	4.07067	4.07067	4.07067	4.07067	4.07067	4.07067	4.07067	4.07067	4.07067	4.07067	4.07067
31	0.162541	0.567042	0.835338	1.05774	1.20489	1.34525	1.46615	1.60672	1.74118	1.86824	2.08534	2.19733	2.30361	2.40029	2.48238	2.66304	2.81547	2.90734	2.98089	3.11623	3.20294	3.28026	3.36145	3.46153	3.51728	3.55026	3.58669	3.59004	3.59004	3.59004	3.59004	3.59004	3.59004	3.59004	3.59004	3.59004	3.59004	3.59004	3.59004	3.59004	3.59004
32	0.699568	0.893863	1.05659	1.22127	1.40111	1.55081	1.67863	1.92497	2.09452	2.20936	2.33722	2.46465	2.56128	2.78653	2.92634	3.11168	3.202	3.29252	3.42274	3.49466	3.70453	3.78699	3.85754	3.91635	3.94532	4.04617	4.06609	4.07883	4.07883	4.07883	4.07883	4.07883	4.07883	4.07883	4.07883	4.07883	4.07883	4.07883	4.07883	4.07883	4.07883
33	0.470963	0.809243	0.990596	1.17085	1.40708	1.67574	1.83948	2.00543	2.17607	2.39927	2.53928	2.67492	2.92794	3.06479	3.22624	3.35371	3.50574	3.60423	3.69605	3.80782	3.92055	4.01299	4.12801	4.17531	4.21128	4.24752	4.37568	4.37568	4.37568	4.37568	4.37568	4.37568	4.37568	4.37568	4.37568	4.37568	4.37568	4.37568	4.37568	4.37568	4.37568
34	0.0574349	0.295649	0.50459	0.77926	0.985965	1.19948	1.37593	1.56228	1.74912	1.93379	2.06926	2.20274	2.31511	2.43549	2.55641	2.68369	2.91182	3.06912	3.26926	3.41221	3.5197	3.64175	3.70966	3.83217	3.88327	3.96239	4.0059	4.02711	4.05102	4.05102	4.05102	4.05102	4.05102	4.05102	4.05102	4.05102	4.05102	4.05102	4.05102	4.05102	4.05102
35	-0.222766	0.225178	0.608641	0.936103	1.21367	1.40616	1.5859	1.81391	2.03635	2.21089	2.35156	2.4793	2.61358	2.77413	2.86604	2.9343	3.08117	3.16888	3.25623	3.35396	3.43144	3.47956	3.54685	3.59708	3.66703	3.71389	3.75031	3.84093	3.84956	3.84956	3.84956	3.84956	3.84956	3.84956	3.84956	3.84956	3.84956	3.84956	3.84956	3.84956	3.84956
36	-1.32322	-0.724819	0.281884	0.58846	0.865883	1.04584	1.19396	1.37833	1.50991	1.62721	1.75854	1.8669	1.95964	2.07237	2.18852	2.28239	2.43352	2.52997	2.64496	2.75229	2.86307	3.03487	3.09058	3.40532	3.711	4.00744	4.04059	4.06234	4.06234	4.06234	4.06234	4.06234	4.06234	4.06234	4.06234	4.06234	4.06234	4.06234	4.06234	4.06234	4.06234
37	-1.18721	0.0921782	0.298142	0.488409	0.727607	0.925399	1.09058	1.23921	1.38426	1.58312	1.70948	1.83417	1.94096	2.0347	2.18086	2.28994	2.38368	2.47976	2.58091	2.74502	2.81912	2.93348	3.00065	3.07699	3.11621	3.34262	3.45799	3.58234	3.58663	3.58663	3.58663	3.58663	3.58663	3.58663	3.58663	3.58663	3.58663	3.58663	3.58663	3.58663	3.58663
38	-0.397042	0.139596	0.539253	0.916536	1.14647	1.29713	1.46032	1.62588	1.80846	1.98764	2.13947	2.25136	2.37143	2.45047	2.58231	2.7042	2.81301	2.89949	3.00404	3.08731	3.19637	3.30496	3.37398	3.46616	3.51035	3.52874	3.53747	3.55472	3.57414	3.59844	3.59844	3.59844	3.59844	3.59844	3.59844	3.59844	3.59844	3.59844	3.59844	3.59844	3.59844
39	-1.22703	-0.405424	0.0182976	0.263602	0.467847	0.543513	0.615972	0.672579	0.764123	0.807539	0.840074	0.921016	1.20654	1.43822	1.67076	1.78293	1.84137	1.98122	2.04839	2.15756	2.27732	2.40378	2.51145	2.60666	2.67705	2.72701	2.83937	2.95646	3.07082	3.15841	3.31248	3.35641	3.3993	3.52445	3.7476	3.89597	3.98644	4.00703	4.06743	4.10644	4.13163
40	0.659749	0.97512	1.25414	1.48563	1.75125	1.92573	2.0976	2.2607	2.42055	2.56395	2.74597	2.82723	2.89246	2.95269	3.04551	3.12479	3.18804	3.20207	3.247	3.25995	3.31523	3.36809	3.39077	3.40381	3.42804	3.50963	3.52472	3.56868	3.58703	3.58827	3.58827	3.58827	3.58827	3.58827	3.58827	3.58827	3.58827	3.58827	3.58827	3.58827	3.58827
41	-1.45905	0.26557	0.738466	0.955766	1.11603	1.30397	1.51913	1.66199	1.82638	2.00438	2.1149	2.33191	2.47196	2.60672	2.75772	2.90197	3.02719	3.21894	3.28756	3.37609	3.46683	3.6327	3.6702	3.70796	3.73006	3.88732	3.9427	3.96791	4.00374	4.00374	4.00374	4.00374	4.00374	4.00374	4.00374	4.00374	4.00374	4.00374	4.00374	4.00374	4.00374
42	-0.518813	0.135058	0.670294	1.06149	1.33774	1.6599	2.04914	2.26765	2.46173	2.65356	2.73799	2.99365	3.0569	3.12371	3.2893	3.35814	3.45542	3.48585	3.50931	3.59357	3.64239	3.6599	3.73629	3.86733	3.86903	3.86903	3.86903	3.86903	3.86903	3.86903	3.86903	3.86903	3.86903	3.86903	3.86903	3.86903	3.86903	3.86903	3.86903	3.86903	3.86903
43	-0.210966	0.566144	0.898709	1.13244	1.3583	1.57575	1.74236	1.88969	1.9839	2.05628	2.11168	2.20325	2.32869	2.467	2.55582	2.69355	2.81038	2.91296	3.03726	3.10924	3.17794	3.18656	3.24373	3.41159	3.51373	3.62508	3.65618	3.67775	3.67775	3.67775	3.67775	3.67775	3.67775	3.67775	3.67775	3.67775	3.67775	3.67775	3.67775	3.67775	3.67775
44	-1.48229	-1.24372	-0.214508	0.37339	0.670431	0.94752	1.28294	1.55455	1.87176	2.13782	2.36589	2.57011	2.78711	2.97096	3.17982	3.34658	3.4884	3.66936	3.78765	3.90711	4.07101	4.23135	4.34298	4.37245	4.37823	4.37823	4.37823	4.37823	4.37823	4.37823	4.37823	4.37823	4.37823	4.37823	4.37823	4.37823	4.37823	4.37823	4.37823	4.37823	4.37823
45	-1.56172	-0.407728	-0.0461099	0.498066	0.787752	1.01064	1.21109	1.39539	1.55522	1.71217	1.86084	2.00155	2.1211	2.24082	2.33895	2.49921	2.5927	2.71307	2.78435	2.87453	2.91284	3.03867	3.11811	3.13497	3.19102	3.19637	3.22992	3.24977	3.24977	3.24977	3.24977	3.24977	3.24977	3.24977	3.24977	3.24977	3.24977	3.24977	3.24977	3.24977	3.24977
46	-0.0410239	0.678106	0.970477	1.1612	1.34257	1.52211	1.70284	1.86393	2.06248	2.20834	2.41998	2.55108	2.67809	2.78891	2.87438	2.90505	2.98411	3.01067	3.02074	3.05242	3.07963	3.17314	3.23026	3.33505	3.42609	3.54713	3.59377	3.62717	3.62717	3.62717	3.62717	3.62717	3.62717	3.62717	3.62717	3.62717	3.62717	3.62717	3.62717	3.62717	3.62717
47	0.646142	1.07682	1.48286	1.75026	1.99147	2.18992	2.3801	2.56279	2.74505	2.93443	3.0827	3.21127	3.37013	3.55194	3.66273	3.77875	3.85722	3.92951	3.9838	4.02355	4.03773	4.04382	4.04382	4.04382	4.04382	4.04382	4.04382	4.04382	4.04382	4.04382	4.04382	4.04382	4.04382	4.04382	4.04382	4.04382	4.04382	4.04382	4.04382	4.04382	4.04382
48	-0.920213	0.731194	0.915737	1.13484	1.29124	1.40669	1.52076	1.69163	1.85998	1.97099	2.0729	2.20485	2.54748	2.79403	2.88179	2.96763	3.14116	3.27872	3.40114	3.4816	3.64672	3.79097	3.83244	3.8674	3.90844	3.90903	3.998	4.20279	4.20554	4.24705	4.24705	4.24705	4.24705	4.24705	4.24705	4.24705	4.24705	4.24705	4.24705	4.24705	4.24705
49	0.299723	0.650495	0.966572	1.13669	1.32274	1.52424	1.73503	1.92737	2.07004	2.28065	2.45895	2.6073	2.7611	2.84901	2.95707	3.03913	3.16106	3.29948	3.37178	3.47584	3.53658	3.57488	3.6621	3.70296	3.79159	3.81696	3.87591	3.91192	3.92575	3.95421	3.95421	3.95421	3.95421	3.95421	3.95421	3.95421	3.95421	3.95421	3.95421	3.95421	3.95421
50	-1.13096	1.20255	1.48866	1.7557	1.98989	2.18139	2.38465	2.57222	2.71482	2.92026	2.97396	3.03678	3.22376	3.29524	3.33602	3.43208	3.52199	3.56292	3.62137	3.65084	3.7373	3.76607	3.76607	3.76607	3.76607	3.76607	3.76607	3.76607	3.76607	3.76607	3.76607	3.76607	3.76607	3.76607	3.76607	3.76607	3.76607	3.76607	3.76607	3.76607	3.76607
51	0.22561	0.644021	0.947008	1.21011	1.37982	1.56315	1.7306	1.8859	2.03585	2.13445	2.29388	2.4341	2.5854	2.76121	2.90525	3.02822	3.09957	3.12622	3.15517	3.21196	3.3365	3.48266	3.48266	3.48266	3.48266	3.48266	3.48266	3.48266	3.48266	3.48266	3.48266	3.48266	3.48266	3.48266	3.48266	3.48266	3.48266	3.48266	3.48266	3.48266	3.48266
52	-1.42036	-1.03407	0.162148	0.514399	0.829718	1.05626	1.24387	1.50314	1.61379	1.69959	1.78403	1.92423	2.16852	2.37571	2.48488	2.57083	2.75935	2.87428	2.92867	3.05412	3.19686	3.29572	3.53182	3.58006	3.72227	3.85569	3.93493	4.00156	4.07415	4.11691	4.16688	4.16981	4.16981	4.16981	4.16981	4.16981	4.16981	4.16981	4.16981	4.16981	4.16981
53	-1.46922	-1.25828	0.274681	0.824457	1.07938	1.4188	1.64134	1.92727	2.08845	2.31294	2.46701	2.66433	2.82765	2.98806	3.11475	3.20927	3.3053	3.3406	3.34589	3.34589	3.34589	3.34589	3.34589	3.34589	3.34589	3.34589	3.34589	3.34589	3.34589	3.34589	3.34589	3.34589	3.34589	3.34589	3.34589	3.34589	3.34589	3.34589	3.34589	3.34589	3.34589
54	-0.844731	-0.505017	0.156854	0.614278	0.895405	1.07581	1.34391	1.51541	1.71623	1.90463	2.10073	2.25219	2.49476	2.65672	2.83637	2.94865	3.12071	3.23189	3.32019	3.44601	3.55284	3.68036	3.73966	3.8207	3.89213	4.00986	4.07738	4.09176	4.09176	4.09176	4.09176	4.09176	4.09176	4.09176	4.09176	4.09176	4.09176	4.09176	4.09176	4.09176	4.09176
55	-1.07221	0.142208	0.536395	0.865787	1.18241	1.42707	1.68692	1.96968	2.15432	2.32172	2.47742	2.60923	2.75807	2.92644	3.02555	3.11605	3.23458	3.67514	3.7337	3.79052	3.8105	3.82219	3.83563	3.8553	3.96718	3.9807	3.99389	3.99389	3.99389	3.99389	3.99389	3.99389	3.99389	3.99389	3.99389	3.99389	3.99389	3.99389	3.99389	3.99389	3.99389
56	-1.22539	-0.920213	0.0125381	0.454018	0.696374	0.921385	1.14493	1.3737	1.51613	1.66668	1.77803	1.90641	1.95961	2.04104	2.10425	2.15751	2.23066	2.29363	2.32581	2.37308	2.41247	2.4256	2.4672	2.61115	2.70544	2.78615	2.83216	2.87066	2.8871	2.95068	3.0171	3.0268	3.07002	3.08821	3.35865	3.6565	3.68649	3.68649	3.68649	3.68649	3.68649
57	-0.441414	0.339674	0.600555	0.768079	1.0605	1.2964	1.51499	1.6607	1.76385	1.87527	1.97041	2.108	2.22192	2.30674	2.50099	2.74317	2.94632	3.22224	3.33516	3.47089	3.59081	3.68466	3.75645	3.79593	3.82795	3.86226	3.89361	3.91534	3.92694	3.92694	3.92694	3.92694	3.92694	3.92694	3.92694	3.92694	3.92694	3.92694	3.92694	3.92694	3.92694
58	-1.51245	1.18062	1.51148	1.73221	1.95052	2.13463	2.28424	2.52381	2.63273	2.72302	2.99631	3.14844	3.24489	3.33012	3.481	3.56107	3.62291	3.65891	3.70624	3.79341	3.8395	3.87619	3.93638	3.98439	3.99545	3.99579	3.99579	3.99579	3.99579	3.99579	3.99579	3.99579	3.99579	3.99579	3.99579	3.99579	3.99579	3.99579	3.99579	3.99579	3.99579
59	-0.300014	0.22983	0.642031	0.930625	1.16902	1.38625	1.5815	1.8137	1.98938	2.09131	2.15155	2.21968	2.2964	2.42316	2.63415	2.77692	2.85498	2.96128	3.01629	3.16537	3.20659	3.27073	3.32899	3.38578	3.48472	3.53944	3.53944	3.53944	3.53944	3.53944	3.53944	3.53944	3.53944	3.53944	3.53944	3.53944	3.53944	3.53944	3.53944	3.53944	3.53944
60	-0.522146	-0.0369968	0.315547	0.64972	0.955654	1.14977	1.32198	1.46559	1.65831	1.8012	1.92912	2.08216	2.20419	2.3171	2.40605	2.58368	2.72798	2.8455	2.92115	2.97616	3.06013	3.12541	3.22982	3.30994	3.3425	3.36573	3.37682	3.37682	3.37682	3.37682	3.37682	3.37682	3.37682	3.37682	3.37682	3.37682	3.37682	3.37682	3.37682	3.37682	3.37682
61	-1.12985	-0.209219	0.340344	0.640688	0.902286	1.05991	1.2427	1.39372	1.52973	1.7882	1.94851	2.12325	2.28156	2.44208	2.60738	2.71712	2.79617	2.86158	2.97035	3.07104	3.12575	3.17872	3.23023	3.24873	3.27474	3.34019	3.38973	3.41529	3.42432	3.43636	3.4777	3.48322	3.48504	3.48629	3.5219	3.54027	3.54027	3.54027	3.54027	3.54027	3.54027
62	-1.24775	0.114584	0.383253	0.651236	0.859953	1.08946	1.38991	1.53979	1.68928	1.8387	2.06637	2.20772	2.28841	2.38454	2.42615	2.46555	2.60692	2.67082	2.79064	2.87188	2.89635	3.02398	3.13317	3.23058	3.35267	3.37484	3.39105	3.4306	3.43525	3.43525	3.43525	3.43525	3.43525	3.43525	3.43525	3.43525	3.43525	3.43525	3.43525	3.43525	3.43525
63	0.156197	0.610495	0.884802	1.09296	1.30754	1.52185	1.71625	1.94946	2.16077	2.36406	2.50546	2.63084	2.72945	2.88507	3.02937	3.1583	3.36656	3.44109	3.48565	3.71283	3.74406	3.81358	3.88589	4.03139	4.08836	4.21961	4.21961	4.21961	4.21961	4.21961	4.21961	4.21961	4.21961	4.21961	4.21961	4.21961	4.21961	4.21961	4.21961	4.21961	4.21961
64	0.59354	0.824398	1.01554	1.20497	1.3681	1.50163	1.65124	1.78298	1.96086	2.06661	2.17455	2.28696	2.40094	2.55905	2.70856	2.79446	2.9449	3.12329	3.19936	3.33518	3.36414	3.40357	3.42438	3.43738	3.52978	3.53817	3.69008	3.76311	3.84252	3.85077	3.85077	3.85077	3.85077	3.85077	3.85077	3.85077	3.85077	3.85077	3.85077	3.85077	3.85077
65	0.354364	0.5927	0.787378	0.949653	1.09578	1.25549	1.37279	1.50182	1.7161	1.9125	2.11159	2.24369	2.3668	2.49585	2.58501	2.66588	2.90831	3.01329	3.08714	3.19484	3.28491	3.50382	3.57751	3.64218	3.70779	3.70779	3.70779	3.70779	3.70779	3.70779	3.70779	3.70779	3.70779	3.70779	3.70779	3.70779	3.70779	3.70779	3.70779	3.70779	3.70779
66	0.349042	0.674685	1.07659	1.24593	1.39524	1.6348	1.78975	1.9995	2.20669	2.33709	2.46142	2.59316	2.81349	2.88307	2.99771	3.09603	3.15524	3.20473	3.25568	3.3014	3.43322	3.46547	3.50004	3.65994	3.6681	3.67619	3.67619	3.67619	3.67619	3.67619	3.67619	3.67619	3.67619	3.67619	3.67619	3.67619	3.67619	3.67619	3.67619	3.67619	3.67619
67	-0.222323	0.996237	1.30617	1.57765	1.80303	2.11034	2.28104	2.44079	2.58587	2.70868	2.81784	2.91447	2.98988	3.04593	3.13482	3.17737	3.23018	3.29623	3.3148	3.52848	3.59163	3.63731	3.64558	3.67228	3.67821	3.67821	3.67821	3.67821	3.67821	3.67821	3.67821	3.67821	3.67821	3.67821	3.67821	3.67821	3.67821	3.67821	3.67821	3.67821	3.67821
68	-1.02821	-0.341593	0.814823	1.10587	1.38909	1.57705	1.79307	1.97139	2.16392	2.563	2.7621	2.96476	3.15828	3.34556	3.41543	3.45587	3.48876	3.51198	3.60671	3.81556	3.87653	3.92608	4.05625	4.08393	4.08393	4.08393	4.08393	4.08393	4.08393	4.08393	4.08393	4.08393	4.08393	4.08393	4.08393	4.08393	4.08393	4.08393	4.08393	4.08393	4.08393
69	-1.04467	0.281591	0.657981	0.996603	1.33463	1.70401	1.93006	2.071	2.17983	2.34202	2.47857	2.57386	2.68361	2.79199	2.88554	2.99274	3.13203	3.19882	3.27737	3.44792	3.54823	3.60465	3.63163	3.8232	3.92573	3.98198	4.21646	4.42364	4.49602	4.53496	4.53496	4.53496	4.53496	4.53496	4.53496	4.53496	4.53496	4.53496	4.53496	4.53496	4.53496
70	-1.39146	-0.236484	0.737579	1.02805	1.28872	1.44336	1.65726	1.8167	1.99035	2.14632	2.29435	2.5272	2.78894	2.89294	2.9936	3.051	3.07481	3.09379	3.11664	3.14721	3.30196	3.32848	3.38568	3.42219	3.4666	3.48115	3.50784	3.64203	3.67716	3.67716	3.67716	3.67716	3.67716	3.67716	3.67716	3.67716	3.67716	3.67716	3.67716	3.67716	3.67716
71	-1.25404	-0.409157	0.15292	0.445309	0.738765	1.04486	1.31084	1.53071	1.72	1.91629	2.07455	2.26829	2.42707	2.63736	2.82955	3.03007	3.19447	3.34707	3.47456	3.69783	3.84751	3.95454	4.02588	4.07015	4.07015	4.07015	4.07015	4.07015	4.07015	4.07015	4.07015	4.07015	4.07015	4.07015	4.07015	4.07015	4.07015	4.07015	4.07015	4.07015	4.07015
72	0.44355	0.834641	1.00877	1.21619	1.39291	1.52338	1.66487	1.87519	2.0212	2.19632	2.34981	2.51107	2.69541	2.82781	3.02312	3.15761	3.26246	3.36522	3.45761	3.52041	3.67767	3.71702	3.77238	3.80659	3.83095	3.83969	3.83969	3.83969	3.83969	3.83969	3.83969	3.83969	3.83969	3.83969	3.83969	3.83969	3.83969	3.83969	3.83969	3.83969	3.83969
73	0.0260114	0.611078	1.03155	1.31185	1.57026	1.74267	1.89422	2.19596	2.39386	2.50982	2.65692	2.75028	2.95459	3.0269	3.06326	3.15919	3.19907	3.39622	3.4373	3.52139	3.59608	3.61688	3.64986	3.64986	3.64986	3.64986	3.64986	3.64986	3.64986	3.64986	3.64986	3.64986	3.64986	3.64986	3.64986	3.64986	3.64986	3.64986	3.64986	3.64986	3.64986
74	-1.5128	-0.632789	-0.175238	0.338851	0.694145	1.0525	1.35533	1.5505	1.72275	1.8696	2.06642	2.20442	2.31529	2.41925	2.50842	2.59372	2.74206	2.808	2.92715	3.07561	3.15014	3.21312	3.30086	3.37731	3.46943	3.50148	3.50148	3.50148	3.50148	3.50148	3.50148	3.50148	3.50148	3.50148	3.50148	3.50148	3.50148	3.50148	3.50148	3.50148	3.50148
75	0.176197	0.656067	1.07834	1.37241	1.58988	1.77209	1.95522	2.14107	2.28737	2.37304	2.55949	2.78473	2.89057	2.96489	3.14636	3.32684	3.45656	3.51082	3.55564	3.64915	3.72642	3.78484	3.81101	3.83678	3.89562	3.91125	3.98316	3.98316	3.98316	3.98316	3.98316	3.98316	3.98316	3.98316	3.98316	3.98316	3.98316	3.98316	3.98316	3.98316	3.98316
76	0.554226	0.841439	1.14529	1.36373	1.5583	1.71055	1.89864	2.072	2.23313	2.40067	2.56969	2.74277	2.88494	2.97251	3.15049	3.23457	3.31173	3.37825	3.44203	3.48586	3.50715	3.51968	3.53756	3.55017	3.6905	3.75462	3.82365	3.84071	3.86072	3.86072	3.86072	3.86072	3.86072	3.86072	3.86072	3.86072	3.86072	3.86072	3.86072	3.86072	3.86072
77	-0.997452	0.671271	0.946626	1.16659	1.3065	1.48151	1.61157	1.72493	1.85034	2.00702	2.17668	2.25875	2.36694	2.45701	2.55286	2.85028	2.92184	3.0362	3.17819	3.32276	3.46631	3.53149	3.61919	3.72521	3.73699	3.73699	3.73699	3.73699	3.73699	3.73699	3.73699	3.73699	3.73699	3.73699	3.73699	3.73699	3.73699	3.73699	3.73699	3.73699	3.73699
78	-1.38397	-1.23371	-0.986608	0.449158	0.683499	0.855267	1.00452	1.19887	1.35562	1.45732	1.55281	1.69216	1.81175	1.90315	1.95836	2.12264	2.23836	2.39213	2.43139	2.5162	2.58194	2.71722	2.81899	2.89589	2.93401	2.98701	3.04541	3.09783	3.16579	3.21781	3.34814	3.34814	3.34814	3.34814	3.34814	3.34814	3.34814	3.34814	3.34814	3.34814	3.34814
79	-0.195359	0.412166	0.68368	0.986969	1.29138	1.47337	1.67875	1.8423	2.00394	2.15906	2.28518	2.37226	2.57024	2.6553	2.7239	2.79772	2.85829	2.92847	2.97646	3.08559	3.35366	3.50913	3.55353	3.58712	3.58712	3.58712	3.58712	3.58712	3.58712	3.58712	3.58712	3.58712	3.58712	3.58712	3.58712	3.58712	3.58712	3.58712	3.58712	3.58712	3.58712
80	-1.50957	-1.37264	-1.28039	-1.24515	-1.20786	-1.19604	-1.18235	-1.16092	-1.14963	-1.14105	-1.00366	0.320975	0.798021	1.05037	1.23007	1.38525	1.6602	1.94513	2.08397	2.19435	2.32207	2.43882	2.53699	2.63471	2.79671	2.84983	2.96576	3.16259	3.19683	3.3163	3.42829	3.50493	3.56386	3.6114	3.64	3.86024	3.88098	3.88098	3.88098	3.88098	3.88098
81	0.6092	1.07369	1.45774	1.78967	2.00415	2.20269	2.40979	2.55052	2.77312	2.90366	3.07201	3.19963	3.33296	3.43509	3.51371	3.59617	3.64239	3.68946	3.74121	3.7757	3.8261	3.90566	3.93357	3.95408	3.96676	3.96676	3.96676	3.96676	3.96676	3.96676	3.96676	3.96676	3.96676	3.96676	3.96676	3.96676	3.96676	3.96676	3.96676	3.96676	3.96676
82	-1.46844	0.00349784	0.361873	0.638266	0.878136	1.09252	1.25746	1.48119	1.6331	1.85203	2.2887	2.48845	2.71036	2.92397	3.06455	3.14242	3.25095	3.43041	3.5764	3.61612	3.69324	3.7041	3.75318	3.75318	3.75318	3.75318	3.75318	3.75318	3.75318	3.75318	3.75318	3.75318	3.75318	3.75318	3.75318	3.75318	3.75318	3.75318	3.75318	3.75318	3.75318
83	-0.161339	0.574163	0.879416	1.13167	1.36902	1.53441	1.68084	1.83533	2.07787	2.22493	2.44332	2.61077	2.77102	2.96035	3.07946	3.21587	3.36254	3.46628	3.55936	3.63846	3.73581	3.80175	3.88821	3.93743	3.96095	3.98338	4.00445	4.02578	4.17094	4.18369	4.18958	4.18958	4.18958	4.18958	4.18958	4.18958	4.18958	4.18958	4.18958	4.18958	4.18958
84	-1.42892	-0.193913	0.331023	0.655791	0.959646	1.16861	1.35111	1.61241	1.77534	1.95283	2.10773	2.26715	2.37009	2.47346	2.60851	2.80463	2.92171	3.03944	3.18275	3.32043	3.4321	3.52673	3.6036	3.6468	3.71495	3.90599	3.94543	3.96676	4.01953	4.04056	4.05587	4.05587	4.05587	4.05587	4.05587	4.05587	4.05587	4.05587	4.05587	4.05587	4.05587
85	-0.850584	0.954988	1.21414	1.46401	1.67931	1.84356	2.05932	2.20579	2.40698	2.55974	2.67587	2.7792	2.88964	3.03998	3.23965	3.53961	3.61777	3.66207	3.7413	3.82233	3.82233	3.82233	3.82233	3.82233	3.82233	3.82233	3.82233	3.82233	3.82233	3.82233	3.82233	3.82233	3.82233	3.82233	3.82233	3.82233	3.82233	3.82233	3.82233	3.82233	3.82233
86	-0.344982	0.0556561	0.296123	0.532682	0.732706	1.02642	1.30389	1.50532	1.66863	1.8235	1.94582	2.07511	2.2205	2.34662	2.6373	2.79185	2.98367	3.16987	3.25761	3.31687	3.36991	3.49126	3.66348	3.74039	3.77347	3.77347	3.77347	3.77347	3.77347	3.77347	3.77347	3.77347	3.77347	3.77347	3.77347	3.77347	3.77347	3.77347	3.77347	3.77347	3.77347
87	0.330823	0.757114	0.984167	1.2957	1.5166	1.67577	1.83265	1.95853	2.06599	2.16704	2.2806	2.43428	2.54577	2.67145	2.78066	2.90608	2.98871	3.07766	3.22085	3.30588	3.38696	3.44719	3.46719	3.50282	3.51657	3.84356	3.84356	3.84356	3.84356	3.84356	3.84356	3.84356	3.84356	3.84356	3.84356	3.84356	3.84356	3.84356	3.84356	3.84356	3.84356
88	-1.48061	-1.20707	0.733683	1.11895	1.25898	1.36875	1.46134	1.58401	1.68895	1.84534	2.0182	2.13261	2.27005	2.37044	2.54775	2.6533	2.84556	2.91527	2.98435	3.04722	3.10081	3.15957	3.2883	3.51502	3.71249	3.79775	3.93567	4.00097	4.02069	4.02069	4.02069	4.02069	4.02069	4.02069	4.02069	4.02069	4.02069	4.02069	4.02069	4.02069	4.02069
89	-0.917778	-0.267731	0.20354	0.552602	0.844587	1.02784	1.22598	1.37833	1.57052	1.78628	1.91301	2.04849	2.17701	2.36604	2.49097	2.62031	2.74242	2.85163	2.93586	3.16527	3.26947	3.39349	3.48718	3.57468	3.71106	3.79613	3.87287	3.96541	4.00349	4.00349	4.00349	4.00349	4.00349	4.00349	4.00349	4.00349	4.00349	4.00349	4.00349	4.00349	4.00349
90	-1.07785	0.699213	0.982825	1.24127	1.47321	1.70768	1.88974	2.07857	2.24502	2.39208	2.56703	2.74914	2.89412	3.09721	3.23436	3.33437	3.44502	3.54807	3.58892	3.61626	3.62272	3.62272	3.62272	3.62272	3.62272	3.62272	3.62272	3.62272	3.62272	3.62272	3.62272	3.62272	3.62272	3.62272	3.62272	3.62272	3.62272	3.62272	3.62272	3.62272	3.62272
91	-1.25638	-0.486026	0.364401	0.65384	0.902219	1.07409	1.2399	1.40795	1.56934	1.74108	1.89445	2.08182	2.1642	2.28367	2.58658	2.72156	2.96619	3.08966	3.26471	3.3483	3.46214	3.51477	3.55288	3.59443	3.65458	3.73068	3.80412	3.89406	3.96306	4.01807	4.10607	4.26051	4.27761	4.27899	4.27899	4.27899	4.27899	4.27899	4.27899	4.27899	4.27899
92	-1.47934	0.426915	0.661922	0.888731	1.06833	1.24604	1.40032	1.55	1.70868	1.85675	2.02174	2.19292	2.33506	2.424	2.77189	2.85983	2.96346	3.05792	3.1657	3.25476	3.30796	3.34573	3.43305	3.47751	3.50801	3.56694	3.59697	3.62978	3.64256	3.69161	3.71954	3.71954	3.71954	3.71954	3.71954	3.71954	3.71954	3.71954	3.71954	3.71954	3.71954
93	-1.0879	0.0971023	0.360986	0.62689	0.8839	1.05387	1.20366	1.44408	1.75381	1.87905	2.06486	2.14851	2.27429	2.40517	2.50384	2.59343	2.62567	2.69104	2.78736	2.84106	2.86314	2.88346	2.90101	2.94673	3.00179	3.08382	3.13334	3.24547	3.27743	3.27998	3.38243	3.47316	3.47316	3.47316	3.47316	3.47316	3.47316	3.47316	3.47316	3.47316	3.47316
94	-1.17934	-0.281873	0.230113	0.630544	0.888572	1.09191	1.27694	1.54822	1.73603	1.96109	2.12092	2.35058	2.48016	2.53789	2.62405	2.80954	2.8909	2.99659	3.05976	3.40117	3.49863	3.53237	3.59508	3.70249	3.79239	3.89883	3.92616	3.94555	3.96799	4.00576	4.00576	4.00576	4.00576	4.00576	4.00576	4.00576	4.00576	4.00576	4.00576	4.00576	4.00576
95	-1.31089	-0.907232	-0.609439	-0.195143	0.0813382	0.270107	0.461061	0.588576	0.723728	0.923874	1.25618	1.48843	1.68024	1.81858	1.89079	1.98469	2.07879	2.14817	2.20956	2.24345	2.26826	2.35875	2.36907	2.41184	2.49526	2.50401	2.59326	2.62575	2.62756	2.64102	2.68078	2.69203	2.69203	2.69203	2.69203	2.69203	2.69203	2.69203	2.69203	2.69203	2.69203
96	-0.24907	0.0706703	0.420489	0.653244	0.975041	1.19001	1.39767	1.60761	1.79008	1.96203	2.11698	2.25568	2.52121	2.75852	2.89585	3.01951	3.28926	3.42218	3.50204	3.5435	3.61305	3.77382	3.80967	3.8099	3.82229	3.85414	3.85414	3.85414	3.85414	3.85414	3.85414	3.85414	3.85414	3.85414	3.85414	3.85414	3.85414	3.85414	3.85414	3.85414	3.85414
97	0.114604	0.622416	0.818073	1.01411	1.31606	1.55146	1.75061	1.99398	2.18046	2.33047	2.47965	2.6095	2.71639	2.83591	2.97931	3.0795	3.13105	3.17408	3.18763	3.21696	3.23254	3.30785	3.34459	3.34459	3.34459	3.34459	3.34459	3.34459	3.34459	3.34459	3.34459	3.34459	3.34459	3.34459	3.34459	3.34459	3.34459	3.34459	3.34459	3.34459	3.34459
98	-1.46092	-1.14839	-0.00116318	0.376815	0.710622	0.924844	1.12969	1.31033	1.56302	1.79808	1.91195	2.0204	2.11319	2.27971	2.44487	2.514	2.63544	2.77525	2.82758	2.98455	3.06062	3.10321	3.1375	3.25825	3.31194	3.34091	3.35357	3.44907	3.51474	3.60443	3.69498	3.71531	3.72937	3.81109	3.87161	3.8756	3.8756	3.8756	3.8756	3.8756	3.8756
99	-1.17972	0.086836	1.40396	1.62777	2.02165	2.20096	2.47498	2.67431	2.82971	3.09337	3.34803	3.48424	3.57996	3.6344	3.67697	3.69617	3.74746	3.80184	3.81977	3.87251	3.88544	3.94336	4.00742	4.07539	4.09811	4.09811	4.09811	4.09811	4.09811	4.09811	4.09811	4.09811	4.09811	4.09811	4.09811	4.09811	4.09811	4.09811	4.09811	4.09811	4.09811
100	-0.202622	0.423225	0.707214	0.891952	1.03006	1.27282	1.33848	1.51629	1.74072	1.87195	1.93689	2.13471	2.24043	2.3626	2.59377	2.67307	2.75323	2.84874	3.09322	3.28863	3.55239	3.62961	3.7488	3.86479	3.89562	3.92275	3.95579	3.95579	3.95579	3.95579	3.95579	3.95579	3.95579	3.95579	3.95579	3.95579	3.95579	3.95579	3.95579	3.95579	3.95579
101	-1.00631	-0.920213	-0.920213	-0.920213	-0.920213	-0.920213	-0.920213	-0.920213	-0.920213	-0.920213	-0.920213	-0.920213	-0.920213	-0.920213	-0.920213	-0.920213	-0.920213	-0.920213	-0.920213	-0.920213	-0.920213	-0.920213	-0.920213	-0.920213	-0.920213	-0.920213	-0.920213	-0.920213	-0.920213	-0.920213	-0.920213	-0.920213	-0.920213	-0.920213	-0.920213	-0.920213	-0.920213	-0.920213	-0.920213	-0.920213	-0.920213
102	-1.66081	0.709749	1.14602	1.52861	1.73353	1.88405	2.02906	2.15457	2.29026	2.41875	2.51997	2.5838	2.82183	3.06684	3.12822	3.21211	3.34462	3.45923	3.49679	3.56842	3.58438	3.64848	3.79507	3.82355	3.82355	3.82355	3.82355	3.82355	3.82355	3.82355	3.82355	3.82355	3.82355	3.82355	3.82355	3.82355	3.82355	3.82355	3.82355	3.82355	3.82355
103	-0.450859	0.0205969	0.289154	0.422368	0.574918	0.676742	0.747285	0.855935	1.05732	1.30313	1.48776	1.72703	1.85089	1.97705	2.09826	2.22278	2.36518	2.56797	2.74802	2.86732	2.95417	3.1377	3.30501	3.39968	3.48639	3.55	3.61825	3.78079	3.81495	3.86122	3.88624	3.90288	3.97425	4.00655	4.00655	4.00655	4.00655	4.00655	4.00655	4.00655	4.00655
104	-1.33573	-1.25933	-0.490224	0.00708956	0.398947	0.687182	0.90498	1.10672	1.30087	1.46534	1.63448	1.7828	1.96521	2.1572	2.37925	2.53857	2.66537	2.75448	2.83875	3.01013	3.05462	3.12643	3.1953	3.26177	3.29385	3.3202	3.36398	3.38224	3.40384	3.43563	3.51615	3.5991	3.68638	3.73227	3.74213	3.74213	3.74213	3.74213	3.74213	3.74213	3.74213
105	-0.0126225	0.425767	0.693597	0.943088	1.13584	1.31215	1.47084	1.58276	1.68524	1.85549	2.03677	2.15403	2.25182	2.35521	2.50561	2.64425	2.789	2.92521	3.13137	3.28397	3.37898	3.46674	3.58123	3.58498	3.60469	3.64456	3.65278	3.69651	3.704	3.73975	3.73975	3.73975	3.73975	3.73975	3.73975	3.73975	3.73975	3.73975	3.73975	3.73975	3.73975
106	-1.0013	0.0649502	0.629451	0.899675	1.08802	1.24662	1.41313	1.58258	1.75953	1.91089	2.07543	2.23789	2.38263	2.55811	2.6812	2.85386	2.9562	3.08729	3.23998	3.34673	3.4806	3.52119	3.57683	3.64817	3.6835	3.70343	3.71621	3.86566	3.94104	3.94104	3.94104	3.94104	3.94104	3.94104	3.94104	3.94104	3.94104	3.94104	3.94104	3.94104	3.94104
107	0.472972	0.794144	1.00009	1.25397	1.42273	1.59394	1.73774	1.93036	2.08614	2.34476	2.53542	2.71534	3.0219	3.12809	3.23243	3.38263	3.5036	3.58394	3.66327	3.67226	3.74769	3.75081	3.7825	3.79219	3.79301	3.81315	3.81315	3.81315	3.81315	3.81315	3.81315	3.81315	3.81315	3.81315	3.81315	3.81315	3.81315	3.81315	3.81315	3.81315	3.81315
108	-1.66696	-0.920213	0.408859	0.755783	1.05385	1.27539	1.48956	1.68123	1.91954	2.06862	2.20356	2.33206	2.55515	2.92176	3.05164	3.17134	3.27393	3.37357	3.44767	3.52899	3.60502	3.72048	3.7839	3.81976	3.81976	3.81976	3.81976	3.81976	3.81976	3.81976	3.81976	3.81976	3.81976	3.81976	3.81976	3.81976	3.81976	3.81976	3.81976	3.81976	3.81976
109	-0.930316	-0.0309343	0.345101	0.683739	1.07178	1.27322	1.4311	1.56356	1.86992	2.02016	2.13988	2.37301	2.5995	2.7419	2.93304	3.08755	3.23026	3.33604	3.43854	3.58562	3.6649	3.74724	3.74724	3.74724	3.74724	3.74724	3.74724	3.74724	3.74724	3.74724	3.74724	3.74724	3.74724	3.74724	3.74724	3.74724	3.74724	3.74724	3.74724	3.74724	3.74724
110	-1.45403	-1.20957	-0.743782	-0.483224	-0.0966232	0.309962	0.520957	0.777383	1.00534	1.18062	1.40618	1.56165	1.87038	2.00987	2.16099	2.28501	2.40929	2.50722	2.58589	2.69036	2.83812	2.9143	2.96432	3.05001	3.09489	3.13485	3.17242	3.24994	3.44723	3.71019	3.79378	3.84963	3.89029	3.90107	3.92105	3.95568	4.01965	4.19724	4.23375	4.29271	4.31253
111	0.290544	0.549798	0.768584	0.931878	1.12844	1.29046	1.44063	1.58408	1.67015	1.779	1.86462	1.94782	2.18757	2.26571	2.35355	2.42517	2.53408	2.68817	2.7657	2.90413	3.08606	3.15601	3.25433	3.34173	3.41042	3.48327	3.55132	3.67391	3.70908	3.716	3.77134	3.78886	3.7901	3.91407	3.91407	3.91407	3.91407	3.91407	3.91407	3.91407	3.91407
112	-1.33774	-0.20003	0.292794	0.561633	0.70768	0.839696	1.03421	1.28961	1.42116	1.57051	1.76767	2.01196	2.29013	2.42271	2.54608	2.72428	2.87079	2.97231	3.09574	3.20713	3.28699	3.34077	3.39075	3.4229	3.46578	3.48969	3.48969	3.48969	3.48969	3.48969	3.48969	3.48969	3.48969	3.48969	3.48969	3.48969	3.48969	3.48969	3.48969	3.48969	3.48969
113	-1.43337	-1.12354	-0.412562	0.0990176	0.455402	0.735221	0.994179	1.25736	1.4999	1.712	1.92938	2.1042	2.25622	2.44399	2.65299	3.08189	3.21508	3.27493	3.3282	3.42494	3.50055	3.58544	3.77568	3.8812	3.99606	4.09235	4.12736	4.12736	4.12736	4.12736	4.12736	4.12736	4.12736	4.12736	4.12736	4.12736	4.12736	4.12736	4.12736	4.12736	4.12736
114	-0.713777	-0.04697	0.430343	0.86582	1.17561	1.52036	1.82352	2.07779	2.23121	2.39341	2.48479	2.54601	2.64974	2.71127	2.76349	2.80702	2.85482	2.92285	3.00592	3.1513	3.24215	3.42397	3.56093	3.65652	3.76883	3.80957	3.8434	3.89563	3.91721	4.08639	4.0914	4.0914	4.0914	4.0914	4.0914	4.0914	4.0914	4.0914	4.0914	4.0914	4.0914
115	-0.173023	0.413766	0.742711	1.0455	1.38253	1.8832	2.13446	2.31369	2.48307	2.71712	2.89278	3.02181	3.14758	3.25676	3.33416	3.36655	3.42701	3.45482	3.50903	3.56729	3.58413	3.6119	3.62193	3.70526	3.73873	3.96225	3.98875	3.98875	3.98875	3.98875	3.98875	3.98875	3.98875	3.98875	3.98875	3.98875	3.98875	3.98875	3.98875	3.98875	3.98875
116	-1.24027	0.232733	0.881471	1.10227	1.3781	1.63787	1.84888	2.02391	2.15173	2.25855	2.3745	2.49499	2.64356	2.7419	2.87513	3.00229	3.14814	3.29457	3.4162	3.53997	3.81295	3.88449	3.96037	4.16744	4.23238	4.23238	4.23238	4.23238	4.23238	4.23238	4.23238	4.23238	4.23238	4.23238	4.23238	4.23238	4.23238	4.23238	4.23238	4.23238	4.23238
117	0.361777	0.66856	0.946677	1.2193	1.47023	1.71597	1.90847	2.13001	2.44064	2.58362	2.71957	3.02806	3.18466	3.3235	3.51639	3.73766	3.77739	3.89209	3.9108	3.92363	3.93541	3.95972	4.00289	4.00289	4.00289	4.00289	4.00289	4.00289	4.00289	4.00289	4.00289	4.00289	4.00289	4.00289	4.00289	4.00289	4.00289	4.00289	4.00289	4.00289	4.00289
118	0.397548	0.786707	0.969918	1.21995	1.34214	1.50468	1.66088	1.77779	1.90776	2.12705	2.28954	2.43278	2.56229	2.68492	2.79846	2.88521	2.96648	3.20012	3.33727	3.57589	3.74291	3.90203	4.07611	4.21538	4.34218	4.43348	4.48232	4.48406	4.4959	4.50189	4.50189	4.50189	4.50189	4.50189	4.50189	4.50189	4.50189	4.50189	4.50189	4.50189	4.50189
119	-0.0295144	0.43486	0.763761	1.02411	1.28283	1.4679	1.733	1.94514	2.18329	2.38716	2.55083	2.6952	2.85462	2.96701	3.08705	3.1885	3.28903	3.37919	3.4178	3.47091	3.50812	3.58378	3.67131	3.74888	3.83611	3.8449	3.85955	3.90445	3.92941	3.95974	3.98016	4.02955	4.10726	4.10726	4.10726	4.10726	4.10726	4.10726	4.10726	4.10726	4.10726
120	-1.47934	0.426915	0.661922	0.888731	1.06833	1.24604	1.40032	1.55	1.70868	1.85675	2.02174	2.19292	2.33506	2.424	2.77189	2.85983	2.96346	3.05792	3.1657	3.25476	3.30796	3.34573	3.43305	3.47751	3.50801	3.56694	3.59697	3.62978	3.64256	3.69161	3.71954	3.71954	3.71954	3.71954	3.71954	3.71954	3.71954	3.71954	3.71954	3.71954	3.71954
121	0.116564	0.527276	0.775406	0.977961	1.2732	1.41359	1.531	1.64018	1.7594	1.85607	1.97019	2.06112	2.224	2.64966	2.8008	2.87802	2.93885	2.99643	3.08193	3.17029	3.21326	3.25069	3.28445	3.31458	3.41756	3.47938	3.51167	3.55745	3.55968	3.55968	3.55968	3.55968	3.55968	3.55968	3.55968	3.55968	3.55968	3.55968	3.55968	3.55968	3.55968
122	0.97213	1.35621	1.69373	2.0108	2.24657	2.54425	2.71751	2.92874	3.06187	3.19969	3.31039	3.45857	3.51092	3.55582	3.61628	3.67353	3.7381	3.89452	3.92421	3.95388	3.97172	3.9854	3.9854	3.9854	3.9854	3.9854	3.9854	3.9854	3.9854	3.9854	3.9854	3.9854	3.9854	3.9854	3.9854	3.9854	3.9854	3.9854	3.9854	3.9854	3.9854
123	0.133264	0.561238	0.827671	1.08477	1.32446	1.50774	1.66617	1.80926	1.99356	2.16655	2.26592	2.35758	2.5406	2.63447	2.70665	2.81883	2.87811	3.00837	3.06117	3.09593	3.13544	3.19581	3.23411	3.34105	3.39107	3.45179	3.68941	3.77016	3.82796	3.87663	3.96107	4.01188	4.05168	4.07557	4.07794	4.07794	4.07794	4.07794	4.07794	4.07794	4.07794
124	-1.00998	0.836822	1.05901	1.28649	1.46143	1.62636	1.7562	1.92688	2.15572	2.2598	2.35165	2.43592	2.59101	2.66373	2.72925	2.81083	3.05199	3.1427	3.17297	3.45346	3.52586	3.68833	3.82642	3.95718	4.05295	4.1489	4.2066	4.23305	4.23305	4.23305	4.23305	4.23305	4.23305	4.23305	4.23305	4.23305	4.23305	4.23305	4.23305	4.23305	4.23305
125	-0.950246	-0.197705	0.234393	0.631271	0.947834	1.18402	1.38528	1.58352	1.77719	1.94969	2.08281	2.19289	2.38558	2.52096	2.62662	2.77905	2.87241	2.94334	3.02366	3.17731	3.33397	3.41172	3.58464	3.82027	3.84075	3.9207	3.93241	3.93834	3.96067	4.09105	4.09154	4.17438	4.17438	4.17438	4.17438	4.17438	4.17438	4.17438	4.17438	4.17438	4.17438
126	-1.08151	0.0328759	0.373786	0.662468	0.906441	1.09943	1.25106	1.47507	1.6364	1.79134	2.05557	2.31623	2.50006	2.70189	2.82521	3.01335	3.12686	3.38088	3.4886	3.63363	3.68944	3.73165	3.76517	3.92135	3.99108	4.00257	4.03879	4.08334	4.09269	4.11896	4.1237	4.14705	4.14705	4.14705	4.14705	4.14705	4.14705	4.14705	4.14705	4.14705	4.14705
127	-0.145063	0.462506	0.700688	0.979311	1.24505	1.37181	1.49708	1.62039	1.72199	1.85929	2.20039	2.31907	2.42866	2.5191	2.70451	2.79194	2.85414	2.89199	2.96867	3.0239	3.07577	3.12118	3.25749	3.28035	3.29516	3.3797	3.58112	3.58112	3.58112	3.58112	3.58112	3.58112	3.58112	3.58112	3.58112	3.58112	3.58112	3.58112	3.58112	3.58112	3.58112
128	-1.48546	-0.617598	0.475484	0.870301	1.19928	1.51617	1.82583	1.96689	2.07218	2.24822	2.32977	2.53176	2.68173	2.7401	2.83831	2.89889	3.03642	3.23585	3.50284	3.56452	3.64345	3.73806	4.01797	4.11956	4.17971	4.22927	4.29346	4.31101	4.31101	4.31101	4.31101	4.31101	4.31101	4.31101	4.31101	4.31101	4.31101	4.31101	4.31101	4.31101	4.31101
129	-0.33759	0.186802	0.466375	0.715605	1.00467	1.26493	1.52111	1.68568	1.87412	2.01126	2.14279	2.25096	2.40388	2.58656	2.79105	2.88186	3.00942	3.14323	3.22886	3.34981	3.41902	3.53634	3.5914	3.65401	3.70874	3.7097	3.7097	3.7097	3.7097	3.7097	3.7097	3.7097	3.7097	3.7097	3.7097	3.7097	3.7097	3.7097	3.7097	3.7097	3.7097
130	-1.62935	0.334429	0.663043	0.9633	1.22286	1.45804	1.69027	1.8933	2.07551	2.29313	2.44887	2.61465	2.71385	2.81989	2.94059	3.04304	3.13694	3.24621	3.31381	3.36468	3.39297	3.40773	3.47641	3.51459	3.5459	3.59501	3.65878	3.68142	3.68142	3.68142	3.68142	3.68142	3.68142	3.68142	3.68142	3.68142	3.68142	3.68142	3.68142	3.68142	3.68142
131	-0.702651	0.308971	0.540338	0.755244	0.950494	1.19721	1.41077	1.58596	1.74886	1.99191	2.15844	2.30724	2.43071	2.54653	2.66176	2.75909	2.90044	3.07435	3.17068	3.23002	3.25414	3.33521	3.45412	3.50976	3.52481	3.56728	3.69512	3.70774	3.76826	3.78867	3.87907	3.96818	3.98597	4.06602	4.06602	4.06602	4.06602	4.06602	4.06602	4.06602	4.06602
132	-1.62924	-1.43463	-0.612524	0.0966325	0.544797	0.905304	1.1413	1.3903	1.63421	1.82536	1.97699	2.22204	2.37593	2.54251	2.64326	2.7407	2.83047	2.89053	3.108	3.21193	3.38171	3.44391	3.47603	3.50217	3.51563	3.80241	3.82339	3.82735	4.01712	4.01768	4.08485	4.08485	4.08485	4.08485	4.08485	4.08485	4.08485	4.08485	4.08485	4.08485	4.08485
133	0.642937	1.12462	1.48785	1.81921	2.1374	2.28812	2.38762	2.57651	2.64943	2.76101	2.86406	2.97307	3.10783	3.16791	3.22165	3.28022	3.33035	3.45176	3.59415	3.64129	3.64655	3.67672	3.69677	3.7625	3.7625	3.7625	3.7625	3.7625	3.7625	3.7625	3.7625	3.7625	3.7625	3.7625	3.7625	3.7625	3.7625	3.7625	3.7625	3.7625	3.7625
134	-0.69509	-0.43182	-0.109757	0.172782	0.365151	0.551169	0.824817	1.33839	1.64836	1.81956	2.08576	2.25661	2.40062	2.56367	2.63473	2.73584	2.78723	2.88339	3.00125	3.09284	3.29613	3.33595	3.42656	3.46616	3.48534	3.6034	3.74438	3.7917	3.82327	3.85522	3.85522	3.85522	3.85522	3.85522	3.85522	3.85522	3.85522	3.85522	3.85522	3.85522	3.85522
135	-1.07427	0.160017	0.434652	0.642194	0.833932	0.96099	1.23865	1.53061	1.70639	1.8182	1.92722	2.02564	2.11304	2.26046	2.41043	2.59112	2.68786	2.78274	2.86359	2.94331	3.02763	3.10346	3.16068	3.21389	3.25276	3.29812	3.33515	3.39681	3.39681	3.39681	3.39681	3.39681	3.39681	3.39681	3.39681	3.39681	3.39681	3.39681	3.39681	3.39681	3.39681
136	-0.256256	0.336025	0.824036	1.13208	1.29916	1.47292	1.60895	1.71929	1.87343	1.97582	2.07376	2.18778	2.26149	2.32999	2.43076	2.48047	2.52199	2.6366	2.67073	2.77711	2.84543	2.95544	3.03956	3.10294	3.13473	3.20417	3.22564	3.23256	3.28495	3.30847	3.35914	3.46968	3.58585	3.59971	3.73541	3.74802	3.77721	3.77721	3.77721	3.77721	3.77721
137	-0.451018	0.238898	0.530527	0.747236	0.92409	1.14596	1.29936	1.50738	1.65926	1.79691	1.90392	2.00852	2.15035	2.2528	2.38331	2.54304	2.70347	2.79945	2.88066	3.00974	3.07626	3.12019	3.16642	3.19883	3.21057	3.27838	3.42318	3.65598	3.68737	3.69987	3.74405	3.83478	3.84616	3.84616	3.84616	3.84616	3.84616	3.84616	3.84616	3.84616	3.84616
138	-0.605461	0.472247	0.791255	1.04606	1.25748	1.43574	1.67482	1.87781	2.02105	2.32198	2.44845	2.57452	2.68468	2.81409	2.93784	3.11146	3.30463	3.45368	3.55692	3.62386	3.7179	3.76475	3.79796	3.82535	3.87617	3.90041	3.94943	3.95738	3.95738	3.95738	3.95738	3.95738	3.95738	3.95738	3.95738	3.95738	3.95738	3.95738	3.95738	3.95738	3.95738
139	-0.887944	-0.162977	0.197477	0.475703	0.634333	0.849338	0.995363	1.33427	1.51441	1.66041	1.77126	2.00354	2.20571	2.46864	2.64916	2.87547	3.04417	3.20732	3.36668	3.5152	3.58632	3.81159	3.86608	3.92395	3.98999	4.01217	4.022	4.08966	4.08966	4.08966	4.08966	4.08966	4.08966	4.08966	4.08966	4.08966	4.08966	4.08966	4.08966	4.08966	4.08966
140	-0.690465	-0.00816512	0.439856	0.764714	1.0484	1.31217	1.50617	1.69475	1.97149	2.12312	2.27176	2.40571	2.53457	2.75957	2.96638	3.07827	3.23611	3.34275	3.46037	3.67453	3.77356	3.89125	3.91778	3.94865	3.98776	4.06599	4.17555	4.20963	4.22859	4.31371	4.31371	4.31371	4.31371	4.31371	4.31371	4.31371	4.31371	4.31371	4.31371	4.31371	4.31371
141	-0.468453	0.0893746	0.446422	0.679943	0.840111	0.987374	1.14777	1.28709	1.40604	1.57258	1.79646	1.92437	2.03457	2.14388	2.22351	2.34132	2.4785	2.57418	2.66213	2.73881	2.80984	2.85794	2.90414	2.9493	2.99079	3.19169	3.21432	3.22455	3.39981	3.48911	3.49137	3.53305	3.68329	3.72404	3.7668	3.85337	3.9162	3.9189	4.01928	4.05272	4.08031
142	0.0117294	0.485202	0.741825	0.90221	1.05724	1.18602	1.30157	1.53421	1.72937	1.88781	2.00278	2.19988	2.52111	2.61747	2.73627	2.81939	2.93671	3.02845	3.10914	3.23849	3.35052	3.42218	3.4824	3.5363	3.57493	3.70231	3.73752	3.7547	3.7547	3.7547	3.7547	3.7547	3.7547	3.7547	3.7547	3.7547	3.7547	3.7547	3.7547	3.7547	3.7547
143	0.14612	0.370435	0.62354	0.798701	0.986029	1.38673	1.59206	1.80445	1.97212	2.09766	2.20256	2.3171	2.60538	2.72442	2.91867	3.13212	3.34686	3.43726	3.52252	3.74775	3.85267	3.88747	3.926	4.01199	4.08646	4.12723	4.15808	4.26589	4.3164	4.3164	4.3164	4.3164	4.3164	4.3164	4.3164	4.3164	4.3164	4.3164	4.3164	4.3164	4.3164
144	-1.26124	0.233996	0.655131	1.14603	1.43869	1.62371	1.78755	1.93315	2.02099	2.11318	2.22236	2.32495	2.37385	2.59234	2.78603	2.83931	2.89825	2.93567	2.9677	3.0852	3.30578	3.40227	3.50794	3.61409	3.62108	3.62433	3.69055	3.69055	3.69055	3.69055	3.69055	3.69055	3.69055	3.69055	3.69055	3.69055	3.69055	3.69055	3.69055	3.69055	3.69055
145	-0.307472	0.547436	0.85001	1.10025	1.32819	1.49026	1.66418	1.83318	2.00689	2.1602	2.40961	2.54857	2.65265	2.72321	2.87065	2.92471	2.9706	3.01877	3.10862	3.19933	3.23212	3.28729	3.31097	3.39289	3.44195	3.49131	3.50732	3.58212	3.59681	3.63788	3.65534	3.68568	3.68568	3.68568	3.68568	3.68568	3.68568	3.68568	3.68568	3.68568	3.68568
146	-1.48126	-1.25271	-0.94365	-0.532085	-0.292413	-0.0859648	0.0563416	0.165845	0.328576	0.481187	0.72552	1.06601	1.30546	1.50469	1.66261	1.85616	2.14738	2.27326	2.42167	2.57422	2.74742	2.96139	3.05183	3.12253	3.1804	3.2758	3.29728	3.32418	3.39301	3.48257	3.55522	3.69131	3.8014	3.90547	3.99024	4.09353	4.09353	4.09353	4.09353	4.09353	4.09353
147	-0.28573	0.361167	0.642081	0.886566	1.12103	1.31009	1.48878	1.63075	1.71709	1.82365	1.94339	2.18356	2.31616	2.46238	2.59736	2.70982	2.90508	2.97478	3.06578	3.13585	3.228	3.331	3.38966	3.52291	3.73037	3.81642	3.86782	3.89609	3.92291	4.02902	4.18441	4.20645	4.20645	4.20645	4.20645	4.20645	4.20645	4.20645	4.20645	4.20645	4.20645
148	-0.661803	0.173047	0.632503	0.937742	1.18537	1.39242	1.52098	1.65587	1.97663	2.08563	2.20097	2.31119	2.51786	2.71392	2.85267	3.00198	3.16203	3.30454	3.44356	3.56085	3.70798	3.79066	3.88554	3.94949	3.9902	4.02679	4.06612	4.09503	4.12219	4.12219	4.12219	4.12219	4.12219	4.12219	4.12219	4.12219	4.12219	4.12219	4.12219	4.12219	4.12219
149	-0.128482	0.49505	0.816179	1.0554	1.24132	1.36577	1.49616	1.66209	1.85557	2.03115	2.20413	2.41212	2.56385	2.712	2.94239	3.05499	3.14183	3.22758	3.32918	3.40612	3.56485	3.61984	3.66331	3.73796	3.77834	3.80368	3.82267	3.88784	3.88784	3.88784	3.88784	3.88784	3.88784	3.88784	3.88784	3.88784	3.88784	3.88784	3.88784	3.88784	3.88784
150	0.238554	0.702217	0.982973	1.25102	1.41398	1.61952	1.73275	1.88385	1.99607	2.15702	2.33063	2.4706	2.69584	2.81519	3.0315	3.16573	3.30063	3.39895	3.49753	3.57212	3.6629	3.80947	3.80947	3.80947	3.80947	3.80947	3.80947	3.80947	3.80947	3.80947	3.80947	3.80947	3.80947	3.80947	3.80947	3.80947	3.80947	3.80947	3.80947	3.80947	3.80947
151	0.775849	1.08279	1.36768	1.62888	1.75948	1.88219	1.99964	2.09843	2.20382	2.2964	2.39862	2.49919	2.58586	2.71595	2.78835	2.83278	2.87087	2.97058	3.07964	3.14326	3.17867	3.21296	3.36468	3.38602	3.41029	3.43563	3.45437	3.54802	3.54802	3.54802	3.54802	3.54802	3.54802	3.54802	3.54802	3.54802	3.54802	3.54802	3.54802	3.54802	3.54802
152	-1.23213	0.0756023	0.449821	0.749559	0.953606	1.17521	1.3734	1.52231	1.65763	1.80655	2.0358	2.25335	2.35168	2.44228	2.52556	2.62536	2.75855	2.90714	3.0069	3.09014	3.1641	3.24052	3.31442	3.48312	3.52004	3.67466	3.67652	3.67652	3.67652	3.67652	3.67652	3.67652	3.67652	3.67652	3.67652	3.67652	3.67652	3.67652	3.67652	3.67652	3.67652
153	0.464774	0.742424	0.935467	1.14353	1.30675	1.52209	1.73605	1.90429	2.05077	2.22373	2.37576	2.51322	2.659	2.79728	2.91178	3.02581	3.14223	3.20785	3.2744	3.52308	3.56705	3.63252	3.66632	3.67624	3.67624	3.67624	3.67624	3.67624	3.67624	3.67624	3.67624	3.67624	3.67624	3.67624	3.67624	3.67624	3.67624	3.67624	3.67624	3.67624	3.67624
154	0.414718	0.795692	1.10437	1.37026	1.6018	1.79198	1.974	2.14206	2.30252	2.49549	2.62959	2.80438	2.95596	3.06801	3.19388	3.34627	3.45211	3.51431	3.59603	3.64861	3.70288	3.72888	3.7391	3.8093	3.99172	4.06028	4.06177	4.1205	4.15213	4.1758	4.24213	4.2795	4.2795	4.2795	4.2795	4.2795	4.2795	4.2795	4.2795	4.2795	4.2795
155	-0.0895302	0.24169	0.503457	0.756564	1.00944	1.2359	1.40663	1.55975	1.69907	1.8377	1.97588	2.1068	2.23214	2.40114	2.50077	2.58265	2.6512	2.73259	2.78116	2.79109	2.84655	3.01586	3.14083	3.23765	3.35166	3.51469	3.59497	3.63582	3.63582	3.63582	3.63582	3.63582	3.63582	3.63582	3.63582	3.63582	3.63582	3.63582	3.63582	3.63582	3.63582
156	-1.32415	0.659381	0.85092	1.05181	1.37083	1.52681	1.68984	1.85253	1.96539	2.12127	2.28052	2.3839	2.49231	2.66292	2.94805	3.10892	3.2623	3.36377	3.48347	3.7349	3.87709	3.9239	3.93453	3.97647	3.99058	4.01506	4.04558	4.04854	4.06867	4.06867	4.06867	4.06867	4.06867	4.06867	4.06867	4.06867	4.06867	4.06867	4.06867	4.06867	4.06867
157	-1.27264	-0.0803638	0.931494	1.27053	1.58658	1.76918	1.90129	2.02407	2.14564	2.37959	2.48583	2.6142	2.72765	2.85401	3.02477	3.13084	3.22856	3.34734	3.43588	3.60402	3.70321	3.76279	3.82106	3.86448	3.8962	3.89699	3.9192	3.9192	3.9192	3.9192	3.9192	3.9192	3.9192	3.9192	3.9192	3.9192	3.9192	3.9192	3.9192	3.9192	3.9192
158	-0.35367	0.53322	0.651354	0.782383	1.23214	1.58542	1.91355	2.08035	2.20594	2.30616	2.39774	2.52333	2.63027	2.73221	2.83676	2.93239	3.00741	3.10156	3.5309	3.57396	3.6253	3.62949	3.69545	3.77663	3.77663	3.77663	3.77663	3.77663	3.77663	3.77663	3.77663	3.77663	3.77663	3.77663	3.77663	3.77663	3.77663	3.77663	3.77663	3.77663	3.77663
159	-0.0467936	0.309336	0.606037	0.874657	1.16566	1.3812	1.52954	1.67156	1.86433	1.96742	2.13249	2.26839	2.38955	2.47899	2.54928	2.61622	2.69167	2.79705	2.88023	2.94926	3.01144	3.1801	3.35237	3.53244	3.57647	3.61285	3.62923	3.64428	3.65044	3.65044	3.65044	3.65044	3.65044	3.65044	3.65044	3.65044	3.65044	3.65044	3.65044	3.65044	3.65044
160	-1.85782	-0.948542	-0.66589	-0.562577	-0.458388	-0.376986	-0.31418	-0.235663	-0.0984544	-0.0421175	0.0257475	0.0672194	0.0908057	0.112299	0.150033	0.229376	0.669541	0.900571	1.12	1.34326	1.52666	1.67378	1.8316	1.95	2.06779	2.18629	2.38408	2.61745	2.79572	2.96216	3.05906	3.27174	3.37121	3.52635	3.73805	3.94624	4.12996	4.20827	4.32837	4.38528	4.47773
161	-1.01345	0.502782	0.833749	1.06727	1.27951	1.44213	1.60216	1.75849	2.09963	2.23933	2.3642	2.4503	2.57295	2.66642	2.77213	2.9145	3.19706	3.35231	3.45435	3.54382	3.60437	3.69712	3.82674	3.86175	3.92606	3.93708	4.00861	4.03001	4.07748	4.08974	4.08974	4.08974	4.08974	4.08974	4.08974	4.08974	4.08974	4.08974	4.08974	4.08974	4.08974
162	0.683888	0.924631	1.14295	1.40283	1.65041	1.86733	2.0747	2.30429	2.527	2.68995	2.83426	3.09403	3.17096	3.26835	3.33948	3.41396	3.56756	3.64213	3.70769	3.76342	3.78975	3.84042	3.91721	3.99054	4.08955	4.12501	4.14334	4.23273	4.32495	4.34031	4.34926	4.34926	4.34926	4.34926	4.34926	4.34926	4.34926	4.34926	4.34926	4.34926	4.34926
163	0.550102	0.743868	0.897409	1.10844	1.30057	1.47916	1.63228	1.83966	2.05208	2.2469	2.62391	2.75839	2.86728	2.98745	3.05314	3.12527	3.1916	3.40626	3.47583	3.50036	3.58051	3.64152	3.75071	3.76807	3.79018	3.80241	3.88316	3.90256	3.90981	3.91888	3.91888	3.91888	3.91888	3.91888	3.91888	3.91888	3.91888	3.91888	3.91888	3.91888	3.91888
164	-0.96586	0.649706	0.808134	0.981879	1.18881	1.29536	1.39486	1.58209	1.7124	1.80968	1.96809	2.12272	2.26813	2.45296	2.53439	2.76929	2.91888	3.12254	3.27378	3.47398	3.51035	3.57753	3.61378	3.67886	3.71351	3.77018	3.87834	3.89816	3.89816	3.89816	3.89816	3.89816	3.89816	3.89816	3.89816	3.89816	3.89816	3.89816	3.89816	3.89816	3.89816
165	-1.57356	-0.822965	-0.492191	0.105015	0.945989	1.18462	1.39842	1.55747	1.69348	1.93799	2.14287	2.30811	2.41523	2.67686	2.81559	2.92491	3.02822	3.12595	3.20662	3.27593	3.33496	3.42035	3.48786	3.55265	3.62701	3.67692	3.71217	3.8591	4.02132	4.06175	4.06175	4.06175	4.06175	4.06175	4.06175	4.06175	4.06175	4.06175	4.06175	4.06175	4.06175
166	-1.34701	-0.446821	0.331749	0.656563	0.813389	1.04129	1.22783	1.39218	1.58588	1.83651	1.96777	2.19807	2.5131	2.65641	2.82633	3.03414	3.14519	3.28629	3.40391	3.55958	3.67918	3.7443	3.78643	3.8348	3.86655	3.88516	3.89932	3.92405	3.92405	3.92405	3.92405	3.92405	3.92405	3.92405	3.92405	3.92405	3.92405	3.92405	3.92405	3.92405	3.92405
167	-1.19572	0.973589	1.26427	1.49494	1.79212	1.99708	2.16338	2.32797	2.59224	2.76385	2.96886	3.08997	3.20976	3.37736	3.46496	3.56533	3.65019	3.8208	3.88151	3.92024	3.92024	3.92024	3.92024	3.92024	3.92024	3.92024	3.92024	3.92024	3.92024	3.92024	3.92024	3.92024	3.92024	3.92024	3.92024	3.92024	3.92024	3.92024	3.92024	3.92024	3.92024
168	-1.41662	-0.556828	0.62331	0.985327	1.24858	1.49168	1.79448	2.02706	2.23527	2.43717	2.62266	2.72689	2.83902	3.00987	3.09825	3.19923	3.26665	3.408	3.49104	3.56541	3.61628	3.69744	3.77645	3.8194	3.86378	3.95922	3.95922	3.95922	3.95922	3.95922	3.95922	3.95922	3.95922	3.95922	3.95922	3.95922	3.95922	3.95922	3.95922	3.95922	3.95922
169	-0.366845	0.0129914	0.248852	0.533412	0.86605	1.13289	1.39883	1.65484	1.91621	2.14756	2.35419	2.52847	2.646	2.77769	2.89008	2.94983	3.03319	3.11617	3.20385	3.27898	3.30572	3.31908	3.34945	3.39038	3.39994	3.43022	3.46464	3.46809	3.46809	3.46809	3.46809	3.46809	3.46809	3.46809	3.46809	3.46809	3.46809	3.46809	3.46809	3.46809	3.46809
170	-1.25459	-0.920213	0.571905	1.13591	1.3977	1.59465	1.89299	2.08366	2.48503	2.66414	2.81967	2.95892	3.08908	3.29841	3.48746	3.54129	3.5946	3.64185	3.70339	3.72748	3.90503	3.92488	4.05652	4.08038	4.09289	4.10139	4.10139	4.10139	4.10139	4.10139	4.10139	4.10139	4.10139	4.10139	4.10139	4.10139	4.10139	4.10139	4.10139	4.10139	4.10139
171	0.165749	0.444736	0.654508	0.83276	1.0074	1.2377	1.45428	1.62918	1.91091	2.10424	2.24593	2.39575	2.55299	2.67462	2.85317	3.01817	3.12094	3.22436	3.33814	3.42097	3.61348	3.70765	3.77209	3.83049	3.87288	3.88426	3.90603	3.91136	3.98681	4.03603	4.03603	4.03603	4.03603	4.03603	4.03603	4.03603	4.03603	4.03603	4.03603	4.03603	4.03603
172	-1.47917	-0.617767	0.202955	1.36732	1.61353	1.77698	1.92683	2.07092	2.20775	2.36423	2.49107	2.52426	2.57731	2.59704	2.72453	2.76063	2.86472	2.89078	2.91909	2.98107	3.06803	3.14208	3.26641	3.27712	3.28002	3.30822	3.32044	3.38548	3.40715	3.45187	3.45187	3.45187	3.45187	3.45187	3.45187	3.45187	3.45187	3.45187	3.45187	3.45187	3.45187
173	-1.23256	0.680229	0.965303	1.18354	1.54377	1.72365	1.92966	2.09511	2.24052	2.34325	2.49096	2.71702	2.89057	3.0733	3.23376	3.40528	3.50595	3.60678	3.6381	3.66947	3.69985	3.71108	3.71108	3.71108	3.71108	3.71108	3.71108	3.71108	3.71108	3.71108	3.71108	3.71108	3.71108	3.71108	3.71108	3.71108	3.71108	3.71108	3.71108	3.71108	3.71108
174	0.541638	0.915155	1.16117	1.38051	1.56426	1.81668	1.98698	2.1464	2.2504	2.40854	2.57127	2.82547	2.92169	3.01345	3.08273	3.19838	3.25818	3.43661	3.48807	3.55434	3.67442	3.71076	3.71076	3.71076	3.71076	3.71076	3.71076	3.71076	3.71076	3.71076	3.71076	3.71076	3.71076	3.71076	3.71076	3.71076	3.71076	3.71076	3.71076	3.71076	3.71076
175	0.0675349	0.428157	0.786361	1.00382	1.18894	1.39507	1.56437	1.74825	1.9189	2.07887	2.33014	2.44451	2.54107	2.6594	2.79599	2.9318	3.03972	3.12779	3.16965	3.21443	3.2626	3.30166	3.33258	3.40494	3.53461	3.54962	3.58817	3.60742	3.63436	3.667	3.68238	3.93443	3.93443	3.93443	3.93443	3.93443	3.93443	3.93443	3.93443	3.93443	3.93443
176	0.172914	0.608519	0.85775	1.05726	1.29092	1.51136	1.80322	2.00968	2.21824	2.31119	2.39741	2.52411	2.79452	2.94958	3.06627	3.17601	3.32625	3.42376	3.47498	3.56383	3.59403	3.68341	3.82541	3.94244	3.99236	4.02703	4.02703	4.02703	4.02703	4.02703	4.02703	4.02703	4.02703	4.02703	4.02703	4.02703	4.02703	4.02703	4.02703	4.02703	4.02703
177	-0.139821	0.558416	0.95672	1.2406	1.441	1.6116	1.74294	1.92357	2.05361	2.18545	2.31219	2.47538	2.60254	2.74233	2.86588	2.97575	3.10102	3.14054	3.32915	3.3992	3.42067	3.42067	3.42067	3.42067	3.42067	3.42067	3.42067	3.42067	3.42067	3.42067	3.42067	3.42067	3.42067	3.42067	3.42067	3.42067	3.42067	3.42067	3.42067	3.42067	3.42067
178	-0.647526	1.13804	1.3934	1.57923	1.7365	1.90518	2.0857	2.24915	2.38798	2.47468	2.56744	2.70291	2.76416	2.81454	2.86292	3.06388	3.08678	3.14083	3.31733	3.39137	3.42168	3.51706	3.67582	3.73898	3.79958	3.81905	3.86017	3.92571	4.14589	4.15066	4.17434	4.17434	4.17434	4.17434	4.17434	4.17434	4.17434	4.17434	4.17434	4.17434	4.17434
179	0.66966	1.07948	1.35931	1.59588	1.83186	2.09987	2.29169	2.58823	2.74984	2.93759	3.11319	3.28353	3.45331	3.60921	3.71684	3.7967	3.94224	4.02649	4.08512	4.11267	4.13802	4.16831	4.16831	4.16831	4.16831	4.16831	4.16831	4.16831	4.16831	4.16831	4.16831	4.16831	4.16831	4.16831	4.16831	4.16831	4.16831	4.16831	4.16831	4.16831	4.16831
180	-1.29936	-1.08427	-0.503903	-0.0137823	0.272474	0.575388	0.821082	1.02255	1.19376	1.33982	1.4651	1.58	1.64738	1.71195	1.75967	1.84021	1.87984	1.89772	1.92324	1.97332	2.02127	2.05037	2.09164	2.09877	2.14348	2.36936	2.69078	2.78992	2.90341	2.95207	3.01802	3.09134	3.22266	3.2641	3.33687	3.45248	3.49959	3.52361	3.54493	3.60362	3.61316
181	-0.134018	0.288775	0.627809	0.949503	1.21552	1.45077	1.68579	1.92532	2.11002	2.2804	2.4042	2.49523	2.58396	2.71677	2.86158	3.00058	3.07566	3.13479	3.25001	3.34855	3.40329	3.49185	3.56471	3.58848	3.6278	3.65063	3.68901	3.69551	3.73129	3.77588	3.82366	3.83597	3.83597	3.83597	3.83597	3.83597	3.83597	3.83597	3.83597	3.83597	3.83597
182	-1.3465	0.396681	0.960179	1.24509	1.51607	1.73664	1.9161	2.02365	2.11336	2.38072	2.45778	2.61673	2.70773	2.8168	2.90024	3.0096	3.07956	3.16066	3.24489	3.34625	3.36614	3.38355	3.40076	3.41676	3.45165	3.47473	3.51349	3.75463	3.87834	3.94733	4.03902	4.08918	4.10277	4.10277	4.10277	4.10277	4.10277	4.10277	4.10277	4.10277	4.10277
183	-0.553339	0.244606	0.524504	0.726385	0.881233	1.03935	1.21758	1.31834	1.40639	1.4791	1.52771	1.58379	1.61672	1.65104	1.67896	1.71807	1.77754	1.82391	1.85675	1.90471	1.92924	1.94137	2.0349	2.09684	2.13577	2.19349	2.19545	2.2226	2.22815	2.23027	2.24411	2.25317	2.2837	2.67303	2.89832	3.15981	3.29948	3.47042	3.58069	3.6525	3.74536
184	-1.62592	-0.928246	-0.0376248	0.461913	0.778669	1.0072	1.248	1.43568	1.60591	1.81031	1.98856	2.16288	2.30124	2.42119	2.51175	2.70263	2.82138	2.9092	2.99995	3.09016	3.17113	3.26376	3.34836	3.47597	3.59891	3.73132	3.92655	3.98006	4.0261	4.06051	4.08444	4.10155	4.10155	4.10155	4.10155	4.10155	4.10155	4.10155	4.10155	4.10155	4.10155
185	-0.282724	0.344778	0.725127	1.05651	1.34806	1.59219	1.81785	2.00351	2.18598	2.34258	2.48705	2.60208	2.76303	2.86812	2.94957	3.00124	3.20148	3.25095	3.37626	3.40334	3.49461	3.50088	3.50198	3.52561	3.62163	3.62163	3.62163	3.62163	3.62163	3.62163	3.62163	3.62163	3.62163	3.62163	3.62163	3.62163	3.62163	3.62163	3.62163	3.62163	3.62163
186	-0.382024	0.178698	0.602515	0.873031	1.08113	1.28659	1.43245	1.57584	1.76833	1.89866	2.0515	2.18109	2.38292	2.5659	2.78878	2.89712	3.05075	3.18598	3.29162	3.39655	3.48649	3.53994	3.60062	3.63737	3.68638	3.7139	3.75368	3.7724	3.7857	3.79983	3.89787	3.89787	3.89787	3.89787	3.89787	3.89787	3.89787	3.89787	3.89787	3.89787	3.89787
187	-0.0851892	0.420849	0.687324	0.963046	1.12927	1.29662	1.45697	1.5954	1.77874	1.91343	2.01709	2.15192	2.28648	2.452	2.57565	2.75074	2.85459	3.05713	3.1754	3.26359	3.36313	3.45871	3.59639	3.75167	3.81226	3.87959	3.95859	4.04403	4.15556	4.17181	4.18359	4.24822	4.2622	4.2622	4.2622	4.2622	4.2622	4.2622	4.2622	4.2622	4.2622
188	-1.22964	0.492752	0.839552	1.17406	1.43778	1.62897	1.75756	2.00898	2.18486	2.34906	2.45465	2.58438	2.65245	2.71455	2.78535	2.84728	2.88168	2.95489	2.99784	3.05843	3.13032	3.18566	3.40649	3.49029	3.51772	3.81819	3.86961	4.00992	4.00992	4.00992	4.00992	4.00992	4.00992	4.00992	4.00992	4.00992	4.00992	4.00992	4.00992	4.00992	4.00992
189	-0.559892	0.566338	0.94036	1.17559	1.39162	1.71936	1.97623	2.1392	2.2947	2.50211	2.60673	2.71438	2.81256	2.9427	3.05163	3.11036	3.17904	3.22863	3.25902	3.27976	3.38437	3.53424	3.55702	3.59717	3.6149	3.61749	3.61749	3.61749	3.61749	3.61749	3.61749	3.61749	3.61749	3.61749	3.61749	3.61749	3.61749	3.61749	3.61749	3.61749	3.61749
190	-0.606467	0.00919932	0.512139	0.783849	0.983011	1.16229	1.32938	1.50518	1.67969	1.90057	2.03405	2.23887	2.39436	2.48409	2.57003	2.69048	2.76779	2.88488	2.99324	3.05822	3.13176	3.17682	3.39401	3.51574	3.54489	3.56193	3.58516	3.62801	3.64077	3.64077	3.64077	3.64077	3.64077	3.64077	3.64077	3.64077	3.64077	3.64077	3.64077	3.64077	3.64077
191	0.30786	0.753098	1.06631	1.28732	1.48616	1.63657	1.78703	1.86083	1.92593	2.07186	2.22088	2.34408	2.47284	2.60273	2.73457	2.95229	3.1331	3.26053	3.3068	3.39299	3.45343	3.56648	3.64229	3.73737	3.84073	3.87943	3.919	3.96425	4.05385	4.11152	4.15303	4.21124	4.234	4.25542	4.52746	4.54211	4.54211	4.54211	4.54211	4.54211	4.54211
192	-1.42429	-0.654489	-0.0327035	0.22955	0.470177	0.687366	1.03469	1.25318	1.42598	1.64026	1.8189	2.01251	2.17727	2.29974	2.44241	2.56699	2.84832	2.97103	3.07951	3.22349	3.32707	3.41661	3.55412	3.64908	3.73617	3.80557	3.83255	3.8487	3.92366	4.01062	4.04291	4.08755	4.17049	4.1878	4.30724	4.30724	4.30724	4.30724	4.30724	4.30724	4.30724
193	-1.43893	-0.508787	0.189114	0.540323	0.785711	0.9623	1.17938	1.28424	1.45877	1.56604	1.66629	1.76659	1.94851	2.07148	2.20316	2.3771	2.53341	2.71737	2.83405	2.94255	2.99815	3.08715	3.17426	3.18904	3.27298	3.29073	3.29377	3.35872	3.40944	3.58771	3.76098	3.77232	3.79543	3.91845	3.91845	3.91845	3.91845	3.91845	3.91845	3.91845	3.91845
194	0.207618	0.622717	0.906814	1.12468	1.31365	1.53791	1.66849	1.7939	1.91034	2.03749	2.17598	2.34217	2.4745	2.62136	2.73814	2.82944	2.96418	3.04183	3.09648	3.18242	3.2186	3.25725	3.37155	3.47267	3.51453	3.55211	3.57444	3.63087	3.65074	3.70591	3.71178	3.78731	3.85094	3.92316	4.00655	4.03234	4.06678	4.08467	4.08467	4.08467	4.08467
195	-0.0653431	0.426852	0.711134	0.913514	1.07828	1.22742	1.39483	1.52637	1.70585	1.84387	1.97971	2.10671	2.1978	2.28935	2.38685	2.61924	2.79776	2.96136	3.09539	3.1575	3.19671	3.29717	3.61363	3.65926	3.72954	3.81447	3.90024	3.95451	3.98586	3.98586	3.98586	3.98586	3.98586	3.98586	3.98586	3.98586	3.98586	3.98586	3.98586	3.98586	3.98586
196	0.392925	0.712807	0.943534	1.13574	1.41735	1.55484	1.85731	1.96518	2.09394	2.20094	2.30271	2.46096	2.62521	2.77691	2.94001	3.17511	3.26048	3.35451	3.44246	3.49756	3.70218	3.84439	4.00323	4.0838	4.13831	4.21118	4.22952	4.32749	4.33486	4.33486	4.33486	4.33486	4.33486	4.33486	4.33486	4.33486	4.33486	4.33486	4.33486	4.33486	4.33486
197	-1.17992	0.204921	0.493958	0.724346	0.972237	1.12974	1.2816	1.40784	1.62912	1.78853	1.95129	2.08203	2.20421	2.31973	2.44699	2.53834	2.7256	2.87925	2.9918	3.09155	3.15477	3.17028	3.27003	3.34904	3.40743	3.57525	3.65208	3.67853	3.73469	3.79914	3.90379	4.04721	4.19245	4.27997	4.31102	4.32301	4.399	4.42092	4.42092	4.42092	4.42092
198	0.303175	0.61323	0.928692	1.2192	1.48031	1.76195	1.98384	2.17997	2.36028	2.53029	2.70782	2.83301	2.95826	3.09735	3.22185	3.32979	3.40439	3.46671	3.52985	3.5833	3.71166	3.76314	3.80609	3.89338	3.97697	3.97697	3.97697	3.97697	3.97697	3.97697	3.97697	3.97697	3.97697	3.97697	3.97697	3.97697	3.97697	3.97697	3.97697	3.97697	3.97697
199	-1.61363	0.6701	1.18142	1.57096	1.84717	2.01234	2.16318	2.28646	2.42606	2.5488	2.75004	2.87095	2.94653	3.02612	3.08008	3.09681	3.27165	3.36242	3.47741	3.49785	3.54976	3.61419	3.61419	3.61419	3.61419	3.61419	3.61419	3.61419	3.61419	3.61419	3.61419	3.61419	3.61419	3.61419	3.61419	3.61419	3.61419	3.61419	3.61419	3.61419	3.61419
200	-1.36793	0.266131	1.05081	1.3708	1.61865	1.84294	1.99502	2.25201	2.40214	2.51755	2.76696	2.89097	3.125	3.21461	3.38172	3.53101	3.71176	3.8672	3.94931	4.0549	4.19066	4.26979	4.31669	4.32021	4.32021	4.32021	4.32021	4.32021	4.32021	4.32021	4.32021	4.32021	4.32021	4.32021	4.32021	4.32021	4.32021	4.32021	4.32021	4.32021	4.32021
201	0.598835	0.973433	1.26869	1.59068	1.90465	2.19212	2.43825	2.65893	2.81871	2.97717	3.11712	3.30588	3.43616	3.56334	3.73805	3.85234	3.95879	4.05026	4.06639	4.1361	4.1361	4.1361	4.1361	4.1361	4.1361	4.1361	4.1361	4.1361	4.1361	4.1361	4.1361	4.1361	4.1361	4.1361	4.1361	4.1361	4.1361	4.1361	4.1361	4.1361	4.1361
202	-1.40796	-1.30151	-0.474514	-0.00274688	0.313335	0.551063	0.735039	0.876875	1.06668	1.42674	1.56608	1.7945	1.98162	2.18601	2.38985	2.58037	2.71813	2.90544	3.26919	3.39161	3.51655	3.61977	3.71003	3.81968	3.89832	3.93317	3.98282	4.02419	4.04908	4.05514	4.05514	4.05514	4.05514	4.05514	4.05514	4.05514	4.05514	4.05514	4.05514	4.05514	4.05514
203	-1.09335	0.65966	0.987779	1.21804	1.38218	1.5101	1.62838	1.73798	1.86812	1.97316	2.06373	2.15012	2.26612	2.43579	2.57841	2.6233	2.67524	2.6961	2.73283	2.96071	3.18537	3.29835	3.42264	3.54039	3.62289	3.65841	3.75107	3.78795	3.80766	3.84881	3.85045	3.85045	3.85045	3.85045	3.85045	3.85045	3.85045	3.85045	3.85045	3.85045	3.85045
204	-1.49414	-0.71369	0.623801	1.34906	1.64956	1.92979	2.21594	2.34521	2.49502	2.71646	2.8478	2.99377	3.12684	3.20709	3.27721	3.40567	3.54824	3.56033	3.57815	3.63219	3.70042	3.83147	3.83202	3.83202	3.83202	3.83202	3.83202	3.83202	3.83202	3.83202	3.83202	3.83202	3.83202	3.83202	3.83202	3.83202	3.83202	3.83202	3.83202	3.83202	3.83202
205	-1.22791	-0.712847	0.519092	0.873191	1.16967	1.3971	1.61415	1.83296	2.05997	2.25365	2.6264	2.81997	3.00381	3.1382	3.25168	3.32441	3.40361	3.47077	3.52502	3.67483	3.80918	3.85943	3.89208	4.07887	4.12054	4.1964	4.28739	4.34799	4.39039	4.39039	4.39039	4.39039	4.39039	4.39039	4.39039	4.39039	4.39039	4.39039	4.39039	4.39039	4.39039
206	-0.755046	-0.348262	-0.0800909	0.185164	0.473631	0.682693	0.889393	1.09907	1.28229	1.43397	1.6345	1.81556	1.99283	2.14129	2.25319	2.49835	2.75599	2.88269	3.01278	3.1133	3.2238	3.35301	3.46049	3.56627	3.61064	3.66087	3.68342	3.72135	3.84442	3.86797	3.92157	4.00464	4.08361	4.11002	4.28612	4.2914	4.54275	4.54275	4.54275	4.54275	4.54275
207	0.48996	0.712147	1.01133	1.18093	1.32507	1.44752	1.59052	1.70803	1.88182	2.01648	2.13594	2.38232	2.58082	2.66497	2.82102	2.88308	2.95974	3.08145	3.14234	3.25418	3.47113	3.78365	3.84059	3.85891	3.87332	3.99751	4.00524	4.04911	4.091	4.091	4.091	4.091	4.091	4.091	4.091	4.091	4.091	4.091	4.091	4.091	4.091
208	0.660395	1.07417	1.31003	1.50408	1.72294	1.895	2.09181	2.37067	2.53851	2.70232	2.82209	2.92929	3.0519	3.18444	3.29047	3.48855	3.60052	3.65716	3.79199	3.89557	3.93198	3.93198	3.93198	3.93198	3.93198	3.93198	3.93198	3.93198	3.93198	3.93198	3.93198	3.93198	3.93198	3.93198	3.93198	3.93198	3.93198	3.93198	3.93198	3.93198	3.93198
209	0.521143	1.14437	1.57008	1.85893	2.17194	2.31204	2.42183	2.53334	2.6202	2.69141	2.88515	2.96554	3.04338	3.2397	3.37599	3.49565	3.58915	3.61871	3.64704	3.66134	3.72282	3.73771	3.82077	3.95398	3.9633	3.9633	3.9633	3.9633	3.9633	3.9633	3.9633	3.9633	3.9633	3.9633	3.9633	3.9633	3.9633	3.9633	3.9633	3.9633	3.9633
210	0.197757	0.620696	0.923595	1.1702	1.40497	1.51223	1.68051	1.81126	2.08737	2.20051	2.33554	2.50994	2.63509	2.72666	2.91541	3.02972	3.28789	3.38079	3.44839	3.58563	3.73274	3.78285	3.81827	3.84939	3.89023	3.91147	3.98691	4.11985	4.11985	4.11985	4.11985	4.11985	4.11985	4.11985	4.11985	4.11985	4.11985	4.11985	4.11985	4.11985	4.11985
211	-1.32001	-0.835657	-0.282135	-0.0240508	0.676015	0.926183	1.11867	1.39648	1.58178	1.69411	1.88838	2.05093	2.17214	2.27532	2.40092	2.47513	2.56843	2.5745	2.63518	2.79166	3.03854	3.16596	3.31323	3.46869	3.53599	3.67464	3.70221	3.70221	3.70221	3.70221	3.70221	3.70221	3.70221	3.70221	3.70221	3.70221	3.70221	3.70221	3.70221	3.70221	3.70221
212	-1.21158	0.329071	0.694807	1.02907	1.24023	1.40129	1.50011	1.66003	1.78595	1.92852	2.02777	2.15135	2.23464	2.33644	2.45674	2.54779	2.62246	2.7387	2.84682	2.96238	3.12188	3.3131	3.40044	3.4794	3.57734	3.65338	3.69819	3.72901	3.79376	3.81805	3.85467	3.87824	3.89735	3.89735	3.89735	3.89735	3.89735	3.89735	3.89735	3.89735	3.89735
213	0.393791	0.584129	0.761571	0.923635	1.04446	1.14852	1.25258	1.39575	1.63291	1.81091	1.95055	2.04567	2.22767	2.33819	2.49425	2.61565	2.73815	2.85305	2.95121	3.05944	3.25879	3.35642	3.43475	3.53115	3.68475	3.85246	3.87132	3.91709	4.01095	4.1339	4.22165	4.26766	4.26766	4.26766	4.26766	4.26766	4.26766	4.26766	4.26766	4.26766	4.26766
214	-0.0293566	0.572501	0.835468	1.21829	1.46433	1.65384	1.84933	2.02962	2.21884	2.38658	2.5036	2.67411	2.8955	2.97398	3.08082	3.16363	3.2308	3.28605	3.36586	3.54379	3.68178	3.73791	3.75469	3.76337	3.77878	3.79603	3.89185	4.00818	4.12881	4.2955	4.48038	4.48038	4.48038	4.48038	4.48038	4.48038	4.48038	4.48038	4.48038	4.48038	4.48038
215	-1.5699	-0.994474	0.481274	0.746017	1.00896	1.22696	1.3855	1.53997	1.7404	1.85591	1.97393	2.11475	2.24893	2.45553	2.56924	2.71371	2.83368	3.01032	3.07969	3.19402	3.26809	3.34315	3.4742	3.52496	3.59747	3.63743	3.73663	3.78362	3.79198	3.88677	3.9429	3.9429	3.9429	3.9429	3.9429	3.9429	3.9429	3.9429	3.9429	3.9429	3.9429
216	0.419471	0.739669	1.03856	1.25211	1.38152	1.54116	1.80336	1.98112	2.11864	2.29665	2.41681	2.55747	2.70273	2.76484	2.81182	2.87407	2.97225	3.08753	3.22862	3.24034	3.31707	3.34388	3.36149	3.37472	3.38489	3.41988	3.5151	3.61942	3.65184	3.65184	3.65184	3.65184	3.65184	3.65184	3.65184	3.65184	3.65184	3.65184	3.65184	3.65184	3.65184
217	-1.41046	-1.16367	-0.660952	-0.061597	0.274821	0.640392	0.932547	1.22558	1.55742	1.79445	2.06466	2.27794	2.42918	2.56287	2.68006	2.79809	2.92268	3.11968	3.21264	3.27784	3.38172	3.44655	3.48987	3.63267	3.67247	3.82898	3.89394	3.92471	3.92639	4.0216	4.0216	4.0216	4.0216	4.0216	4.0216	4.0216	4.0216	4.0216	4.0216	4.0216	4.0216
218	-1.26119	-0.320779	0.280366	0.575983	0.835811	1.08556	1.24405	1.38434	1.64039	1.71422	1.78567	1.97692	2.10089	2.24566	2.39111	2.49805	2.63042	2.65289	2.80064	2.83638	2.91283	2.92696	2.98369	3.0215	3.0448	3.07265	3.12149	3.22673	3.28236	3.41258	3.5862	3.70837	3.72903	3.7675	3.81129	3.81129	3.81129	3.81129	3.81129	3.81129	3.81129
219	-1.12271	0.429	0.643694	0.805252	1.11364	1.27263	1.42233	1.50699	1.68854	1.85265	1.95118	2.18179	2.25551	2.35403	2.48965	2.63788	2.76444	2.84986	2.97614	3.01533	3.08352	3.12141	3.15831	3.2061	3.26751	3.30486	3.35582	3.39588	3.60636	3.67469	3.70614	3.8513	3.89037	3.91981	3.94322	3.97505	3.98327	3.99366	4.06062	4.09571	4.09571
220	-1.54162	-0.347449	0.334854	0.64434	0.958827	1.1693	1.35851	1.50337	1.70531	1.91714	2.13432	2.34239	2.49115	2.62319	2.74527	2.88547	2.99194	3.11872	3.22641	3.33058	3.3691	3.3902	3.43104	3.4628	3.48499	3.52454	3.61214	3.69231	3.69231	3.69231	3.69231	3.69231	3.69231	3.69231	3.69231	3.69231	3.69231	3.69231	3.69231	3.69231	3.69231
221	-1.38587	0.597719	0.92972	1.19697	1.39516	1.73935	2.05594	2.32271	2.53036	2.70422	2.85601	3.09448	3.2358	3.39816	3.51849	3.62701	3.72022	3.83604	3.86596	4.06562	4.08402	4.11841	4.13319	4.14928	4.14928	4.14928	4.14928	4.14928	4.14928	4.14928	4.14928	4.14928	4.14928	4.14928	4.14928	4.14928	4.14928	4.14928	4.14928	4.14928	4.14928
222	0.140631	0.509888	0.712928	0.907112	1.09647	1.2965	1.47355	1.67949	1.80887	1.93708	2.10473	2.21616	2.30039	2.38361	2.50201	2.58298	2.70199	2.77466	2.84935	2.91088	2.99943	3.07086	3.32022	3.37122	3.42178	3.60047	3.7024	3.75482	3.75826	3.81459	3.8496	3.85206	3.89546	3.89644	3.89644	3.89644	3.89644	3.89644	3.89644	3.89644	3.89644
223	-0.128112	0.0964031	0.320138	0.485379	0.642158	0.732522	0.96318	1.19258	1.34738	1.48559	1.70785	1.89501	2.00075	2.10582	2.2148	2.26021	2.31392	2.37786	2.68313	2.7358	2.82122	2.88628	3.02036	3.14546	3.19032	3.26137	3.2827	3.29487	3.30211	3.41784	3.45647	3.45647	3.45647	3.45647	3.45647	3.45647	3.45647	3.45647	3.45647	3.45647	3.45647
224	-1.5902	1.0232	1.31347	1.51377	1.70888	1.9153	2.08605	2.30657	2.48277	2.63345	2.75419	2.95163	3.11118	3.36254	3.41266	3.46889	3.51634	3.60796	3.70982	3.77637	3.86187	3.93335	3.96341	3.97119	3.98943	4.04988	4.08811	4.09027	4.09097	4.12431	4.12431	4.12431	4.12431	4.12431	4.12431	4.12431	4.12431	4.12431	4.12431	4.12431	4.12431
225	0.38385	0.693935	1.06258	1.36386	1.55765	1.74025	1.91934	2.07569	2.22978	2.44275	2.66634	2.80975	2.94061	3.05332	3.15833	3.35219	3.51822	3.61645	3.68001	3.74055	3.781	3.81121	3.81545	3.83604	3.83604	3.83604	3.83604	3.83604	3.83604	3.83604	3.83604	3.83604	3.83604	3.83604	3.83604	3.83604	3.83604	3.83604	3.83604	3.83604	3.83604
226	-0.267111	0.118441	0.336657	0.529674	0.710073	0.859135	1.00834	1.18411	1.34854	1.50016	1.65194	1.77313	1.88686	2.03075	2.21768	2.42764	2.72977	2.84643	2.9592	3.04066	3.18205	3.29846	3.37014	3.46088	3.55485	3.5937	3.6012	3.60401	3.69871	3.78226	3.78226	3.78226	3.78226	3.78226	3.78226	3.78226	3.78226	3.78226	3.78226	3.78226	3.78226
227	-1.40415	-0.784796	0.527121	0.944853	1.19758	1.41492	1.58545	1.74519	1.8872	2.05077	2.20205	2.34844	2.47324	2.61852	2.94038	3.13693	3.2666	3.36612	3.50213	3.55326	3.64278	3.65543	3.70472	3.78415	3.81888	3.84427	3.84427	3.84427	3.84427	3.84427	3.84427	3.84427	3.84427	3.84427	3.84427	3.84427	3.84427	3.84427	3.84427	3.84427	3.84427
228	-0.264167	0.239271	0.587786	0.931565	1.15349	1.37312	1.57973	1.80938	2.0551	2.27163	2.37977	2.50119	2.59197	2.74977	2.88736	2.98566	3.11631	3.21955	3.30348	3.43319	3.47892	3.56121	3.63593	3.68953	3.72778	3.79315	3.81371	3.86165	3.92076	4.05069	4.09144	4.19022	4.21926	4.21926	4.21926	4.21926	4.21926	4.21926	4.21926	4.21926	4.21926
229	-1.09293	0.478163	0.831203	1.02093	1.22603	1.39676	1.79164	2.07682	2.23747	2.37185	2.53012	2.64129	2.73195	2.92565	3.03452	3.124	3.19296	3.35848	3.41407	3.88442	3.929	3.929	3.929	3.929	3.929	3.929	3.929	3.929	3.929	3.929	3.929	3.929	3.929	3.929	3.929	3.929	3.929	3.929	3.929	3.929	3.929
230	-0.603247	0.455326	0.695839	1.01342	1.27099	1.47459	1.65741	1.78341	1.89006	2.15079	2.5714	2.76486	2.88697	3.03633	3.11496	3.16287	3.24807	3.34597	3.45985	3.56016	3.76467	3.82489	3.82489	3.82489	3.82489	3.82489	3.82489	3.82489	3.82489	3.82489	3.82489	3.82489	3.82489	3.82489	3.82489	3.82489	3.82489	3.82489	3.82489	3.82489	3.82489
231	-0.367533	0.0667648	0.62432	1.0726	1.37592	1.60601	1.83135	1.94937	2.11544	2.22441	2.43309	2.52056	2.62328	2.85726	2.97839	3.06869	3.31091	3.39297	3.46082	3.51672	3.56941	3.62084	3.7873	3.8235	3.85053	3.85053	3.85053	3.85053	3.85053	3.85053	3.85053	3.85053	3.85053	3.85053	3.85053	3.85053	3.85053	3.85053	3.85053	3.85053	3.85053
232	-1.70452	-1.12546	-0.12772	0.920254	1.1625	1.39738	1.52459	1.66225	1.82343	1.97459	2.09972	2.21752	2.34182	2.44425	2.56362	2.64705	2.7261	2.80494	2.88101	2.95604	3.05263	3.12445	3.19396	3.26656	3.28136	3.28539	3.3335	3.33615	3.55122	3.60187	3.6092	3.6092	3.6092	3.6092	3.6092	3.6092	3.6092	3.6092	3.6092	3.6092	3.6092
233	-0.381033	0.0972263	0.428562	0.706091	0.888879	1.06145	1.24315	1.46899	1.64028	1.77479	1.91616	2.05231	2.19897	2.32974	2.45777	2.57144	2.68001	2.83294	2.97787	3.05084	3.11723	3.18644	3.24653	3.30291	3.36316	3.42928	3.54242	3.61488	3.68637	3.73094	3.75577	3.78457	3.87873	3.87873	3.87873	3.87873	3.87873	3.87873	3.87873	3.87873	3.87873
234	-0.0844482	0.36417	0.592262	0.814827	1.04452	1.23091	1.47846	1.62699	1.75417	1.94875	2.11477	2.2603	2.37331	2.4779	2.58421	2.79202	2.87412	2.95708	3.03116	3.09398	3.13483	3.25553	3.27261	3.4048	3.41811	3.45623	3.48945	3.52455	3.5259	3.5259	3.5259	3.5259	3.5259	3.5259	3.5259	3.5259	3.5259	3.5259	3.5259	3.5259	3.5259
235	-1.29596	-0.208732	1.36536	1.64207	1.9062	2.10214	2.29366	2.4448	2.56821	2.69158	2.812	2.90833	3.04814	3.16581	3.23316	3.38002	3.43208	3.52855	3.54256	3.5703	3.58164	3.58336	3.64472	3.64792	3.65537	3.65841	3.69149	3.69149	3.69149	3.69149	3.69149	3.69149	3.69149	3.69149	3.69149	3.69149	3.69149	3.69149	3.69149	3.69149	3.69149
236	-1.26564	0.251362	0.502575	0.702562	0.883973	1.03687	1.2214	1.37225	1.52152	1.63683	1.75434	1.82251	1.87368	1.98707	2.03779	2.10468	2.24579	2.40359	2.6045	2.75188	2.84836	2.95357	3.0007	3.07567	3.13678	3.15996	3.17239	3.17873	3.19333	3.19333	3.19333	3.19333	3.19333	3.19333	3.19333	3.19333	3.19333	3.19333	3.19333	3.19333	3.19333
237	-1.53842	-0.309236	0.323393	0.659711	0.924639	1.1733	1.36897	1.61335	1.81547	1.97112	2.1221	2.24345	2.35848	2.4554	2.62356	2.83508	2.96288	3.10755	3.17296	3.33435	3.52297	3.58304	3.67777	3.70357	3.74751	3.77574	3.81677	3.86612	3.92077	3.92077	3.92077	3.92077	3.92077	3.92077	3.92077	3.92077	3.92077	3.92077	3.92077	3.92077	3.92077
238	-1.03392	-0.152102	0.464339	0.78834	1.09437	1.34314	1.57642	1.82945	2.21582	2.36922	2.52346	2.69827	2.78982	2.9196	3.04647	3.12162	3.2365	3.37781	3.47061	3.53704	3.7714	3.85733	3.99152	4.06422	4.08592	4.08592	4.08592	4.08592	4.08592	4.08592	4.08592	4.08592	4.08592	4.08592	4.08592	4.08592	4.08592	4.08592	4.08592	4.08592	4.08592
239	-1.11999	-0.149891	0.445445	0.796064	0.971614	1.13325	1.35619	1.52791	1.70761	1.86725	2.01881	2.13674	2.2317	2.38152	2.50667	2.65758	2.96683	3.12452	3.20881	3.28109	3.32666	3.35729	3.38191	3.54196	3.56206	3.57602	3.67311	3.67311	3.67311	3.67311	3.67311	3.67311	3.67311	3.67311	3.67311	3.67311	3.67311	3.67311	3.67311	3.67311	3.67311
240	-0.143444	0.404935	0.773442	1.05295	1.30471	1.5093	1.67456	1.78597	1.88048	1.96693	2.10085	2.16759	2.20358	2.31186	2.51151	2.63005	2.71638	2.78187	2.90227	3.01098	3.10726	3.28529	3.35379	3.40145	3.4242	3.4242	3.4242	3.4242	3.4242	3.4242	3.4242	3.4242	3.4242	3.4242	3.4242	3.4242	3.4242	3.4242	3.4242	3.4242	3.4242
241	-0.520702	0.482908	0.75896	1.01223	1.34215	1.56015	1.76501	2.02358	2.21079	2.37069	2.52843	2.66567	2.83103	2.99591	3.12519	3.27982	3.36409	3.47999	3.61603	3.71957	3.78631	3.8731	3.93745	3.99168	4.05132	4.13086	4.13086	4.13086	4.13086	4.13086	4.13086	4.13086	4.13086	4.13086	4.13086	4.13086	4.13086	4.13086	4.13086	4.13086	4.13086
242	-1.48846	0.263513	0.70036	1.02529	1.20702	1.38731	1.57029	1.92801	2.09537	2.25326	2.40548	2.5298	2.66916	2.77183	3.03174	3.1406	3.1827	3.26415	3.29868	3.34641	3.39116	3.42723	3.45359	3.65017	3.72101	3.77338	3.79791	3.84549	3.84549	3.84549	3.84549	3.84549	3.84549	3.84549	3.84549	3.84549	3.84549	3.84549	3.84549	3.84549	3.84549
243	-0.213157	0.313045	0.626259	0.828723	1.00719	1.3826	1.56136	1.75343	1.92653	2.10392	2.22062	2.34591	2.43807	2.5421	2.6624	2.76991	3.02643	3.11472	3.22596	3.3096	3.44516	3.48593	3.52768	3.55945	3.59043	3.59043	3.59043	3.59043	3.59043	3.59043	3.59043	3.59043	3.59043	3.59043	3.59043	3.59043	3.59043	3.59043	3.59043	3.59043	3.59043
244	-0.0804234	0.233404	0.644002	0.895912	1.1453	1.28031	1.43878	1.59686	1.85793	2.06773	2.21711	2.34515	2.5339	2.72329	2.81997	2.90804	2.94734	3.02825	3.05479	3.32448	3.52222	3.54631	3.55393	3.65887	3.68086	3.86161	4.00794	4.00794	4.00794	4.00794	4.00794	4.00794	4.00794	4.00794	4.00794	4.00794	4.00794	4.00794	4.00794	4.00794	4.00794
245	0.174179	0.420963	0.671935	1.05136	1.41572	1.62926	1.86381	2.03074	2.16656	2.26558	2.35993	2.41468	2.46285	2.59004	2.70624	2.81373	2.91701	2.97517	3.03851	3.14869	3.18941	3.27171	3.35006	3.37894	3.48343	3.61647	3.77277	3.80625	3.93343	3.95493	3.97335	4.00444	4.00444	4.00444	4.00444	4.00444	4.00444	4.00444	4.00444	4.00444	4.00444
246	-1.0119	0.512005	0.840829	1.10253	1.39014	1.6272	1.80532	1.97114	2.1569	2.29211	2.38916	2.51377	2.61019	2.73824	2.9187	2.99172	3.1112	3.17802	3.32252	3.39034	3.44358	3.49925	3.60614	3.63302	3.66454	3.68883	3.68883	3.68883	3.68883	3.68883	3.68883	3.68883	3.68883	3.68883	3.68883	3.68883	3.68883	3.68883	3.68883	3.68883	3.68883
247	-0.29951	0.80073	1.22768	1.55262	1.83587	2.0313	2.21949	2.45958	2.61261	2.85423	2.9928	3.13059	3.24789	3.35733	3.50504	3.62191	3.72285	3.81672	3.94363	4.02779	4.05366	4.10822	4.18424	4.2248	4.2248	4.2248	4.2248	4.2248	4.2248	4.2248	4.2248	4.2248	4.2248	4.2248	4.2248	4.2248	4.2248	4.2248	4.2248	4.2248	4.2248
248	-1.51506	0.731407	1.14005	1.38555	1.61405	1.80558	1.98988	2.23799	2.46365	2.62814	2.79919	2.96418	3.0989	3.31316	3.45293	3.55584	3.63245	3.71312	3.78486	3.86423	3.90584	4.00186	4.04098	4.04098	4.04098	4.04098	4.04098	4.04098	4.04098	4.04098	4.04098	4.04098	4.04098	4.04098	4.04098	4.04098	4.04098	4.04098	4.04098	4.04098	4.04098
249	-1.33369	-0.626624	-0.406465	-0.101598	0.353757	0.749033	0.950469	1.07227	1.16843	1.26944	1.44104	1.59599	1.75472	1.92931	2.10725	2.23122	2.38327	2.53779	2.72444	2.85295	2.95959	3.04623	3.17447	3.23889	3.28159	3.31329	3.35828	3.46038	3.47542	3.47542	3.47542	3.47542	3.47542	3.47542	3.47542	3.47542	3.47542	3.47542	3.47542	3.47542	3.47542
250	-0.145993	0.269552	0.613649	0.851939	1.16826	1.38314	1.5822	1.78462	1.95173	2.14018	2.32229	2.56345	2.70693	2.84208	2.9651	3.11493	3.27787	3.37947	3.55005	3.77843	3.87707	3.92984	3.95696	4.01087	4.12154	4.30746	4.31251	4.43813	4.66907	4.72997	4.75946	4.75946	4.75946	4.75946	4.75946	4.75946	4.75946	4.75946	4.75946	4.75946	4.75946
251	0.368485	0.767101	0.964631	1.13832	1.28262	1.38526	1.46563	1.5417	1.61612	1.70409	1.91937	2.09504	2.24933	2.39545	2.60886	2.76472	2.91429	3.02487	3.12681	3.21324	3.28866	3.3886	3.40761	3.43529	3.48276	3.50982	3.57367	3.64441	3.65576	3.69094	3.69094	3.69094	3.69094	3.69094	3.69094	3.69094	3.69094	3.69094	3.69094	3.69094	3.69094
252	-0.0261238	0.537523	0.85023	1.13244	1.38565	1.61701	1.84006	2.08307	2.34387	2.56136	2.7147	2.84149	2.95448	3.06697	3.1953	3.29611	3.35482	3.459	3.64127	3.69953	3.85944	3.89393	3.9249	3.94452	4.00867	4.0807	4.08409	4.08469	4.08469	4.08469	4.08469	4.08469	4.08469	4.08469	4.08469	4.08469	4.08469	4.08469	4.08469	4.08469	4.08469
253	-0.229336	0.0752347	0.437055	0.731096	0.961702	1.17594	1.34951	1.51055	1.72756	1.89415	2.10408	2.26579	2.40594	2.521	2.65176	2.75547	2.84783	2.90615	2.98927	3.08144	3.12764	3.17246	3.2126	3.27128	3.29375	3.29375	3.29375	3.29375	3.29375	3.29375	3.29375	3.29375	3.29375	3.29375	3.29375	3.29375	3.29375	3.29375	3.29375	3.29375	3.29375
254	-1.249	0.643005	0.976252	1.30433	1.65235	1.95872	2.18033	2.398	2.59207	2.80098	3.01755	3.19062	3.35489	3.51051	3.62626	3.76861	3.89783	3.99716	4.05107	4.13064	4.13703	4.15836	4.15836	4.15836	4.15836	4.15836	4.15836	4.15836	4.15836	4.15836	4.15836	4.15836	4.15836	4.15836	4.15836	4.15836	4.15836	4.15836	4.15836	4.15836	4.15836
255	0.045127	0.660042	0.99506	1.23262	1.42637	1.59448	1.72903	1.86581	2.00321	2.20107	2.30902	2.40949	2.49312	2.58329	2.7025	2.87759	2.99963	3.07728	3.16148	3.2304	3.28885	3.35744	3.48348	3.64717	3.77956	3.92393	4.13108	4.2181	4.26201	4.33628	4.34918	4.42218	4.4271	4.46264	4.46264	4.46264	4.46264	4.46264	4.46264	4.46264	4.46264
256	0.111567	0.407474	0.701054	0.958943	1.1638	1.33697	1.56144	1.79133	1.95485	2.10417	2.2456	2.33986	2.42979	2.5465	2.64934	2.74817	2.88388	3.00831	3.18237	3.28835	3.40085	3.45062	3.49325	3.52818	3.5749	3.63566	3.66404	3.73106	3.73106	3.73106	3.73106	3.73106	3.73106	3.73106	3.73106	3.73106	3.73106	3.73106	3.73106	3.73106	3.73106
257	-1.50331	-1.24357	-1.04017	-0.920213	-0.656899	0.440648	0.713367	0.953665	1.18765	1.38076	1.56357	1.71627	1.88326	2.02634	2.16842	2.30439	2.46264	2.57936	2.68305	2.78368	2.87237	3.05782	3.14751	3.21661	3.27313	3.32096	3.34989	3.45234	3.49243	3.51204	3.53097	3.54038	3.56365	3.5655	3.5655	3.5655	3.5655	3.5655	3.5655	3.5655	3.5655
258	-0.382637	0.404628	0.603967	0.745377	0.91131	1.03239	1.16657	1.2913	1.38941	1.46546	1.54166	1.61246	1.66132	1.71283	1.93852	2.16797	2.29294	2.38318	2.49568	2.58886	2.6793	2.77048	2.84513	2.90168	3.11153	3.30473	3.43146	3.46997	3.50577	3.52602	3.721	3.82258	3.86387	3.91478	3.91478	3.91478	3.91478	3.91478	3.91478	3.91478	3.91478
259	0.179304	0.447957	0.789145	1.03162	1.23435	1.40944	1.56993	1.71043	1.94882	2.06779	2.17343	2.25942	2.45633	2.49551	2.55031	2.69685	2.77383	2.90481	3.05986	3.12903	3.22042	3.33137	3.43721	3.5105	3.57231	3.61456	3.72231	3.7346	3.79577	3.79577	3.79577	3.79577	3.79577	3.79577	3.79577	3.79577	3.79577	3.79577	3.79577	3.79577	3.79577
260	-1.06231	-0.161236	0.363147	0.739365	1.03051	1.29032	1.53342	1.71472	1.85358	2.0378	2.17553	2.3476	2.47638	2.584	2.77664	2.89146	3.0019	3.08428	3.16256	3.31106	3.44203	3.51431	3.59928	3.65062	3.73238	3.76581	3.76581	3.76581	3.76581	3.76581	3.76581	3.76581	3.76581	3.76581	3.76581	3.76581	3.76581	3.76581	3.76581	3.76581	3.76581
261	0.383533	0.858669	1.19051	1.50188	1.74402	1.93033	2.12245	2.32957	2.50545	2.64225	2.74133	2.90163	3.02743	3.16715	3.37258	3.46044	3.50943	3.59108	3.73933	3.93349	4.21747	4.39124	4.52216	4.57942	4.57942	4.57942	4.57942	4.57942	4.57942	4.57942	4.57942	4.57942	4.57942	4.57942	4.57942	4.57942	4.57942	4.57942	4.57942	4.57942	4.57942
262	-1.65035	-1.00093	-0.461846	0.427576	0.659208	0.890435	1.13572	1.36278	1.64113	1.83233	1.9692	2.07226	2.17504	2.24898	2.32197	2.39311	2.47833	2.5379	2.77976	2.92785	2.95562	2.973	3.02324	3.16674	3.30976	3.36431	3.38765	3.45044	3.55939	3.59396	3.66435	3.79594	3.86467	3.87524	3.91149	4.05022	4.12131	4.14295	4.16897	4.27587	4.34524
263	0.978049	1.26787	1.43513	1.596	1.7492	1.87119	2.00355	2.11035	2.27697	2.43825	2.51808	2.62032	2.68512	2.84361	2.9189	3.01798	3.10556	3.17833	3.28686	3.32383	3.39551	3.42802	3.66408	3.70098	3.75243	3.75243	3.75243	3.75243	3.75243	3.75243	3.75243	3.75243	3.75243	3.75243	3.75243	3.75243	3.75243	3.75243	3.75243	3.75243	3.75243
264	-0.0447728	0.433694	0.661014	0.812858	0.972987	1.42665	1.70007	1.91175	2.08133	2.25433	2.40764	2.56794	2.72199	2.87709	3.0104	3.12746	3.29715	3.42315	3.47888	3.54742	3.59974	3.62571	3.66055	3.67908	3.75785	3.7979	3.84206	3.92958	3.99163	4.01589	4.05336	4.08252	4.08252	4.08252	4.08252	4.08252	4.08252	4.08252	4.08252	4.08252	4.08252
265	-1.12799	-0.758164	0.138076	0.590497	0.889979	1.23154	1.54086	1.79079	2.00492	2.19852	2.37051	2.57216	2.69925	2.76831	2.83765	2.97506	3.10803	3.24608	3.3886	3.49107	3.55793	3.61458	3.71327	3.73968	3.73968	3.73968	3.73968	3.73968	3.73968	3.73968	3.73968	3.73968	3.73968	3.73968	3.73968	3.73968	3.73968	3.73968	3.73968	3.73968	3.73968
266	-1.04587	-0.388898	0.392088	0.719499	0.963502	1.19961	1.45465	1.57737	1.69303	1.79329	1.93679	2.06352	2.21541	2.32515	2.42361	2.51277	2.5993	2.65478	2.75747	2.82615	2.88293	2.94471	3.00869	3.03498	3.03498	3.03498	3.03498	3.03498	3.03498	3.03498	3.03498	3.03498	3.03498	3.03498	3.03498	3.03498	3.03498	3.03498	3.03498	3.03498	3.03498
267	-1.34804	-0.794838	0.0721394	0.430784	0.61568	0.802665	1.02912	1.2154	1.37943	1.54506	1.67291	1.81764	2.05144	2.27004	2.39019	2.5216	2.65795	2.79666	2.90021	2.99893	3.09451	3.15273	3.21737	3.3164	3.34792	3.42168	3.44338	3.49824	3.51415	3.54194	3.58814	3.63214	3.65265	3.65736	3.65736	3.65736	3.65736	3.65736	3.65736	3.65736	3.65736
268	-1.70316	-1.46009	-0.700834	0.813361	1.13126	1.39099	1.62959	1.81924	2.01584	2.19121	2.32008	2.52688	2.65967	2.78185	2.96591	3.13207	3.23797	3.34083	3.41026	3.46791	3.51715	3.61379	3.91025	3.95889	3.96661	3.97928	4.02971	4.02971	4.02971	4.02971	4.02971	4.02971	4.02971	4.02971	4.02971	4.02971	4.02971	4.02971	4.02971	4.02971	4.02971
269	-0.0479798	0.178658	0.559754	0.72933	0.932494	1.11199	1.29867	1.49668	1.69166	1.83694	1.98503	2.27649	2.42145	2.53843	2.73612	2.85154	2.96662	3.11651	3.29408	3.45825	3.5627	3.66611	3.76045	3.8482	3.93367	4.03247	4.09692	4.14963	4.19751	4.19751	4.19751	4.19751	4.19751	4.19751	4.19751	4.19751	4.19751	4.19751	4.19751	4.19751	4.19751
270	0.479628	0.833705	1.10984	1.37699	1.75149	2.07922	2.30873	2.5099	2.6212	2.74726	2.8315	2.90909	2.98232	3.07506	3.15708	3.21666	3.27614	3.35593	3.36083	3.39274	3.53062	3.57171	3.6007	3.6683	3.70417	3.80178	3.85811	3.94765	3.94765	3.94765	3.94765	3.94765	3.94765	3.94765	3.94765	3.94765	3.94765	3.94765	3.94765	3.94765	3.94765
271	-0.627435	0.696681	1.07707	1.22228	1.40467	1.6512	1.83973	1.97238	2.22928	2.41094	2.52596	2.67521	2.76828	2.88835	2.98628	3.10289	3.23247	3.28486	3.4117	3.65031	3.80924	3.96162	4.12739	4.18019	4.20727	4.21269	4.24692	4.30816	4.39659	4.56902	4.56902	4.56902	4.56902	4.56902	4.56902	4.56902	4.56902	4.56902	4.56902	4.56902	4.56902
272	0.609685	0.913814	1.1683	1.40099	1.66726	1.90298	2.10174	2.21909	2.32999	2.42889	2.52554	2.61242	2.68913	2.73266	2.77305	2.88156	3.00786	3.08217	3.16733	3.20236	3.21753	3.26432	3.31221	3.48278	3.74099	3.75075	3.82608	3.98241	4.061	4.09649	4.10247	4.13396	4.16777	4.16777	4.16777	4.16777	4.16777	4.16777	4.16777	4.16777	4.16777
273	0.159101	0.68084	0.941689	1.11164	1.37838	1.56797	1.74716	1.90652	2.16605	2.35831	2.53915	2.74484	2.92442	3.10023	3.40218	3.51988	3.67693	3.74364	3.78634	3.80785	3.86087	3.86951	3.86951	3.86951	3.86951	3.86951	3.86951	3.86951	3.86951	3.86951	3.86951	3.86951	3.86951	3.86951	3.86951	3.86951	3.86951	3.86951	3.86951	3.86951	3.86951
274	-1.63841	0.490631	0.80374	1.09702	1.34419	1.58745	1.88942	2.09702	2.26632	2.43682	2.58534	2.75467	2.97635	3.12693	3.25673	3.34159	3.40506	3.43631	3.50269	3.55553	3.61049	3.62525	3.62659	3.67717	3.73755	3.78331	3.82506	3.82506	3.82506	3.82506	3.82506	3.82506	3.82506	3.82506	3.82506	3.82506	3.82506	3.82506	3.82506	3.82506	3.82506
275	-1.29247	-0.646201	0.575854	0.998173	1.26421	1.5316	1.77604	2.01715	2.25956	2.45498	2.62668	2.76122	2.86174	2.95009	3.12254	3.22709	3.30253	3.37243	3.47438	3.52792	3.57984	3.61939	3.7722	3.79751	3.90585	3.96291	3.99336	4.00675	4.00675	4.00675	4.00675	4.00675	4.00675	4.00675	4.00675	4.00675	4.00675	4.00675	4.00675	4.00675	4.00675
276	-1.41476	-0.0869696	0.518827	0.887918	1.23572	1.45374	1.67127	1.85227	1.99339	2.19963	2.31879	2.45615	2.62463	2.77879	2.93182	3.04307	3.13996	3.2596	3.31688	3.38405	3.47843	3.50274	3.61608	3.69423	3.79822	3.88284	3.92356	3.96164	3.96164	3.96164	3.96164	3.96164	3.96164	3.96164	3.96164	3.96164	3.96164	3.96164	3.96164	3.96164	3.96164
277	-0.513051	-0.114195	0.306503	0.623906	0.888099	1.22521	1.39914	1.58891	1.69804	1.81318	1.9224	2.06641	2.17552	2.21789	2.27653	2.4021	2.50562	2.53828	2.56024	2.5643	2.5643	2.5643	2.5643	2.5643	2.5643	2.5643	2.5643	2.5643	2.5643	2.5643	2.5643	2.5643	2.5643	2.5643	2.5643	2.5643	2.5643	2.5643	2.5643	2.5643	2.5643
278	0.166112	0.408695	0.610236	0.825808	0.963989	1.08403	1.20946	1.33374	1.50486	1.65152	1.82778	1.9801	2.10697	2.21489	2.31565	2.43255	2.5248	2.63565	2.77019	2.93299	3.02632	3.11782	3.19909	3.3031	3.34547	3.36336	3.45266	3.47881	3.55822	3.59833	3.66658	3.78988	3.9862	3.9862	3.9862	3.9862	3.9862	3.9862	3.9862	3.9862	3.9862
279	0.777643	1.04122	1.30448	1.52173	1.68625	1.87834	2.00557	2.1116	2.22194	2.50452	2.62951	2.75718	2.85086	2.91303	3.01937	3.14119	3.26094	3.30619	3.33755	3.35506	3.45583	3.50713	3.51191	3.69652	3.71486	3.7168	3.72445	3.75996	3.82978	3.89399	3.9198	3.9198	3.9198	3.9198	3.9198	3.9198	3.9198	3.9198	3.9198	3.9198	3.9198
280	-0.920213	0.492636	0.930927	1.17862	1.46753	1.69671	1.88057	2.05961	2.20365	2.30988	2.41218	2.51379	2.59105	2.71851	2.86881	3.05481	3.16774	3.27417	3.29925	3.32382	3.40536	3.4801	3.57871	3.61982	3.88558	3.99351	4.14584	4.20381	4.30312	4.31182	4.31182	4.31182	4.31182	4.31182	4.31182	4.31182	4.31182	4.31182	4.31182	4.31182	4.31182
281	-1.36366	-0.0739177	0.446761	0.745088	0.970151	1.16695	1.40287	1.53307	1.67424	1.85562	1.9612	2.09961	2.19984	2.52667	2.67886	2.77527	2.96821	3.03357	3.09705	3.16763	3.24749	3.30898	3.44435	3.4977	3.60819	3.65134	3.66578	3.67327	3.67457	3.70065	3.70065	3.70065	3.70065	3.70065	3.70065	3.70065	3.70065	3.70065	3.70065	3.70065	3.70065
282	-0.653874	-0.112119	0.340001	0.790848	1.1179	1.4155	1.66401	1.87151	2.0313	2.18421	2.37864	2.51394	2.62504	2.73242	2.9139	3.01883	3.17093	3.24718	3.3169	3.40043	3.46829	3.6122	3.76978	3.83392	3.88308	3.89621	3.89621	3.89621	3.89621	3.89621	3.89621	3.89621	3.89621	3.89621	3.89621	3.89621	3.89621	3.89621	3.89621	3.89621	3.89621
283	-1.40241	0.485684	0.732232	0.987731	1.24856	1.43048	1.69983	1.89554	2.10546	2.31627	2.51316	2.68917	2.83968	2.97179	3.10564	3.18377	3.27559	3.32766	3.49439	3.56382	3.64449	3.66024	3.72287	3.72287	3.72287	3.72287	3.72287	3.72287	3.72287	3.72287	3.72287	3.72287	3.72287	3.72287	3.72287	3.72287	3.72287	3.72287	3.72287	3.72287	3.72287
284	-0.618573	0.432452	0.813992	1.19297	1.42476	1.6986	1.87794	2.03085	2.1556	2.35487	2.61257	2.66745	2.8097	2.91338	3.01298	3.15568	3.23545	3.33463	3.4956	3.58845	3.6507	3.69736	3.7653	3.79686	3.81023	3.84526	3.88369	3.97014	3.97014	3.97014	3.97014	3.97014	3.97014	3.97014	3.97014	3.97014	3.97014	3.97014	3.97014	3.97014	3.97014
285	-1.2196	-0.0479138	0.522875	0.88633	1.08834	1.29861	1.50052	1.68504	1.87332	2.11155	2.29141	2.45282	2.66945	2.80806	2.94436	3.05786	3.12852	3.18945	3.27648	3.37483	3.37483	3.37483	3.37483	3.37483	3.37483	3.37483	3.37483	3.37483	3.37483	3.37483	3.37483	3.37483	3.37483	3.37483	3.37483	3.37483	3.37483	3.37483	3.37483	3.37483	3.37483
286	0.802892	1.1068	1.36807	1.65946	1.85793	2.10173	2.31098	2.4679	2.61024	2.74835	2.81011	2.88121	3.02954	3.17893	3.29033	3.36244	3.42497	3.59223	3.65871	3.70593	3.7287	3.79774	3.86719	3.88842	3.90071	3.90071	3.90071	3.90071	3.90071	3.90071	3.90071	3.90071	3.90071	3.90071	3.90071	3.90071	3.90071	3.90071	3.90071	3.90071	3.90071
287	-0.455525	0.277301	0.530586	0.728752	0.911953	1.11488	1.28413	1.4677	1.66254	1.80529	1.94217	2.13089	2.3068	2.4336	2.60113	2.74743	2.99087	3.19727	3.34757	3.4566	3.59877	3.66285	3.79441	3.8665	3.91034	3.92927	3.9807	4.02379	4.04757	4.05919	4.05919	4.05919	4.05919	4.05919	4.05919	4.05919	4.05919	4.05919	4.05919	4.05919	4.05919
288	-1.22987	0.753802	0.97026	1.25174	1.45547	1.65861	1.8818	2.08348	2.28338	2.45629	2.61714	2.76282	2.83428	2.93953	3.01244	3.08207	3.13345	3.33164	3.38293	3.41293	3.45295	3.45754	3.45754	3.45754	3.45754	3.45754	3.45754	3.45754	3.45754	3.45754	3.45754	3.45754	3.45754	3.45754	3.45754	3.45754	3.45754	3.45754	3.45754	3.45754	3.45754
289	-0.360761	0.145086	0.470025	0.801797	0.999518	1.16775	1.3265	1.55773	1.72831	1.87016	2.05223	2.24358	2.38793	2.46669	2.60314	2.69923	2.78232	2.86134	2.94288	3.01527	3.10427	3.17273	3.41004	3.44861	3.47492	3.4963	3.53252	3.59843	3.62036	3.66573	3.68158	3.73964	3.80797	3.87799	3.90869	3.96672	4.0713	4.17344	4.2193	4.2414	4.26883
290	-1.01489	-0.36222	-0.0399677	0.369026	0.620611	0.951531	1.14215	1.42631	1.61367	1.78007	1.96899	2.12845	2.33566	2.4777	2.57875	2.6609	2.83585	2.89172	2.9382	3.03784	3.11969	3.18092	3.26935	3.33992	3.3686	3.39931	3.46354	3.604	3.79359	3.91791	3.94332	3.97772	3.99425	3.99729	4.02826	4.13371	4.14523	4.14523	4.14523	4.14523	4.14523
291	-0.0116966	0.355924	0.616373	0.873201	1.04052	1.19657	1.37957	1.49969	1.61061	1.72404	1.8476	1.96949	2.12888	2.28546	2.41165	2.50777	2.61924	2.80613	2.90219	2.99447	3.04799	3.08741	3.18302	3.21698	3.25071	3.2892	3.2892	3.2892	3.2892	3.2892	3.2892	3.2892	3.2892	3.2892	3.2892	3.2892	3.2892	3.2892	3.2892	3.2892	3.2892
292	-0.811506	-0.0541407	0.67338	0.940361	1.30183	1.49821	1.74506	1.95791	2.13445	2.43261	2.60521	2.76241	2.89006	3.04098	3.35187	3.47337	3.62153	3.76489	3.86405	4.02511	4.11099	4.17427	4.19528	4.25564	4.38542	4.38996	4.43534	4.45284	4.45284	4.45284	4.45284	4.45284	4.45284	4.45284	4.45284	4.45284	4.45284	4.45284	4.45284	4.45284	4.45284
293	-1.17585	-0.920213	0.279538	0.608324	0.91207	1.13878	1.33802	1.56039	1.75518	1.84092	1.93243	2.01652	2.14554	2.24263	2.36314	2.4793	2.57847	2.70694	2.98032	3.11728	3.35371	3.49267	3.53902	3.57881	3.73936	3.7745	3.79484	3.8166	3.85566	3.90096	3.90096	3.90096	3.90096	3.90096	3.90096	3.90096	3.90096	3.90096	3.90096	3.90096	3.90096
294	0.369876	0.808329	0.992222	1.14765	1.2815	1.35081	1.4235	1.4915	1.54067	1.7156	1.81095	2.13245	2.32591	2.4982	2.63657	2.74375	2.97847	3.01194	3.09712	3.31804	3.51151	3.51151	3.51151	3.51151	3.51151	3.51151	3.51151	3.51151	3.51151	3.51151	3.51151	3.51151	3.51151	3.51151	3.51151	3.51151	3.51151	3.51151	3.51151	3.51151	3.51151
295	-1.59554	-0.189051	0.269201	0.663076	0.977601	1.13933	1.34211	1.49374	1.7593	1.88566	2.10561	2.3354	2.60729	2.70093	2.79626	2.89865	3.062	3.17519	3.26511	3.40108	3.47928	3.57958	3.87287	4.00761	4.09621	4.15893	4.16453	4.16453	4.16453	4.16453	4.16453	4.16453	4.16453	4.16453	4.16453	4.16453	4.16453	4.16453	4.16453	4.16453	4.16453
296	0.399465	0.796256	1.01174	1.22118	1.54971	1.7658	1.96736	2.10581	2.27255	2.38471	2.52648	2.63138	2.71757	2.79194	2.86557	2.9383	3.0518	3.21046	3.28011	3.4038	3.5411	3.6398	3.69595	3.76551	3.76551	3.76551	3.76551	3.76551	3.76551	3.76551	3.76551	3.76551	3.76551	3.76551	3.76551	3.76551	3.76551	3.76551	3.76551	3.76551	3.76551
297	-1.22845	-0.173752	0.253668	0.523054	0.774161	0.966386	1.10137	1.33351	1.49692	1.69736	1.85861	2.00858	2.13814	2.29411	2.42847	2.62758	2.73104	2.83088	2.95966	3.12546	3.20289	3.30052	3.36164	3.45829	3.53956	3.61543	3.65858	3.89962	3.99098	4.02477	4.05328	4.05328	4.05328	4.05328	4.05328	4.05328	4.05328	4.05328	4.05328	4.05328	4.05328
298	0.388427	0.685578	0.961203	1.22721	1.41891	1.58652	1.74389	1.91441	2.0529	2.20541	2.37425	2.58537	2.7611	2.87826	2.98402	3.21915	3.27028	3.30721	3.48408	3.51509	3.64476	3.67223	3.69027	3.76876	3.76876	3.76876	3.76876	3.76876	3.76876	3.76876	3.76876	3.76876	3.76876	3.76876	3.76876	3.76876	3.76876	3.76876	3.76876	3.76876	3.76876
299	-1.26661	-0.211978	0.677814	0.934681	1.15761	1.34497	1.47902	1.79012	1.90516	2.13349	2.26076	2.41105	2.59483	2.69823	2.80535	2.89306	2.96129	3.04337	3.11682	3.15246	3.2651	3.30272	3.35621	3.44619	3.54421	3.56816	3.64603	3.76541	3.76541	3.76541	3.76541	3.76541	3.76541	3.76541	3.76541	3.76541	3.76541	3.76541	3.76541	3.76541	3.76541
300	1.27324	1.65186	1.86662	2.09093	2.29377	2.43011	2.55302	2.62035	2.72775	2.83245	2.87931	2.9999	3.11772	3.14335	3.17047	3.17832	3.28418	3.4928	3.54262	3.56636	3.56636	3.56636	3.56636	3.56636	3.56636	3.56636	3.56636	3.56636	3.56636	3.56636	3.56636	3.56636	3.56636	3.56636	3.56636	3.56636	3.56636	3.56636	3.56636	3.56636	3.56636
301	-1.43159	-1.171	-0.563571	0.772833	1.10389	1.40975	1.64392	1.79927	2.06273	2.21185	2.38947	2.53955	2.72939	2.84766	2.93116	3.02371	3.13059	3.21017	3.30241	3.37466	3.44826	3.52034	3.67812	3.84771	3.95213	4.04971	4.09723	4.19538	4.19538	4.19538	4.19538	4.19538	4.19538	4.19538	4.19538	4.19538	4.19538	4.19538	4.19538	4.19538	4.19538
302	0.0452577	0.386914	0.62667	0.834147	1.11254	1.38997	1.51754	1.66288	1.78841	1.89885	1.99087	2.1076	2.39055	2.4886	2.58756	2.6649	2.76859	2.87233	3.00969	3.25278	3.32188	3.37541	3.42281	3.64509	3.70073	3.75085	3.8183	3.84459	3.85601	3.85601	3.85601	3.85601	3.85601	3.85601	3.85601	3.85601	3.85601	3.85601	3.85601	3.85601	3.85601
303	-0.321409	0.662219	1.00422	1.26327	1.49758	1.85062	2.13038	2.31036	2.46711	2.61039	2.7431	2.85603	2.96679	3.07533	3.15649	3.23456	3.30404	3.36906	3.41702	3.45318	3.51615	3.67867	3.76335	3.77257	3.7805	3.84736	3.84736	3.84736	3.84736	3.84736	3.84736	3.84736	3.84736	3.84736	3.84736	3.84736	3.84736	3.84736	3.84736	3.84736	3.84736
304	-1.55524	-0.680451	0.266427	0.525046	0.732234	0.93168	1.05238	1.16756	1.29168	1.46108	1.59928	1.70726	1.80576	1.89631	2.01851	2.16086	2.3042	2.38911	2.52193	2.68952	2.81328	2.99102	3.07311	3.18526	3.26495	3.32505	3.41801	3.49027	3.52996	3.60204	3.70166	3.70166	3.70166	3.70166	3.70166	3.70166	3.70166	3.70166	3.70166	3.70166	3.70166
305	-1.68437	-1.29754	-1.05476	-0.809218	-0.332963	-0.150655	0.159253	0.581127	0.831778	1.04907	1.20664	1.34042	1.49835	1.6049	1.69083	1.99826	2.09729	2.1653	2.29571	2.37692	2.54471	2.61945	2.66817	2.74803	2.9475	3.06883	3.13284	3.17593	3.24087	3.36718	3.41283	3.47485	3.50678	3.59904	3.63083	3.77509	3.80899	3.83238	3.85217	3.87405	3.93901
306	0.044101	0.613827	0.918862	1.25884	1.49214	1.65836	1.80795	1.95564	2.13487	2.30845	2.4958	2.64212	2.76706	2.87642	3.01347	3.14172	3.2297	3.29076	3.40568	3.45876	3.51445	3.57849	3.63602	3.75442	3.91377	3.96226	3.96754	3.97635	3.97635	3.97635	3.97635	3.97635	3.97635	3.97635	3.97635	3.97635	3.97635	3.97635	3.97635	3.97635	3.97635
307	-0.922189	0.132625	0.615855	0.728212	0.839686	0.937738	1.11357	1.40886	1.57648	1.78797	1.97955	2.11088	2.26401	2.38346	2.50316	2.6705	2.78478	3.05872	3.14507	3.25866	3.46461	3.52648	3.58499	3.61595	3.64136	3.65296	3.67092	3.72041	3.72041	3.72041	3.72041	3.72041	3.72041	3.72041	3.72041	3.72041	3.72041	3.72041	3.72041	3.72041	3.72041
308	-1.53904	0.214824	0.527786	0.788457	0.990202	1.20508	1.43293	1.60991	1.80683	1.96572	2.10303	2.24459	2.37593	2.53753	2.67097	2.85323	2.94851	3.03422	3.11404	3.20239	3.28745	3.39693	3.4576	3.58839	3.63891	3.66682	3.86142	3.9626	3.98348	4.00807	4.01382	4.02468	4.02468	4.02468	4.02468	4.02468	4.02468	4.02468	4.02468	4.02468	4.02468
309	0.684979	0.982953	1.17929	1.35779	1.58927	1.73541	1.93699	2.1489	2.30517	2.44711	2.58672	2.72406	2.85081	2.97899	3.0614	3.14405	3.19959	3.24853	3.33347	3.41021	3.45845	3.47958	3.68405	3.80477	3.87923	3.90405	3.94718	3.95775	3.97669	3.98083	4.04868	4.07333	4.0809	4.20742	4.23307	4.23307	4.23307	4.23307	4.23307	4.23307	4.23307
310	-1.51285	0.0900558	0.404221	0.710681	0.981729	1.26697	1.53833	1.66511	1.77354	1.95405	2.0562	2.16909	2.36091	2.47513	2.63911	2.72076	2.97828	3.33062	3.4584	3.60508	3.6754	3.79284	3.95985	4.0949	4.17738	4.2339	4.2339	4.2339	4.2339	4.2339	4.2339	4.2339	4.2339	4.2339	4.2339	4.2339	4.2339	4.2339	4.2339	4.2339	4.2339
311	-1.41695	-0.917543	-0.731728	0.137406	0.553219	0.841265	1.10125	1.30533	1.4873	1.69037	1.80623	1.8855	1.96342	2.08687	2.1619	2.28337	2.39008	2.55735	2.63379	2.72545	2.88778	3.06781	3.19058	3.3146	3.37248	3.4044	3.43185	3.49349	3.5162	3.58861	3.62313	3.65349	3.8264	3.85776	3.85776	3.85776	3.85776	3.85776	3.85776	3.85776	3.85776
312	-0.992848	0.954087	1.16268	1.3366	1.61055	1.79645	2.03707	2.20774	2.31821	2.44231	2.54622	2.68718	2.80065	2.88484	3.06747	3.16624	3.36159	3.42791	3.47896	3.55063	3.59514	3.60496	3.62755	3.6418	3.67517	3.67517	3.67517	3.67517	3.67517	3.67517	3.67517	3.67517	3.67517	3.67517	3.67517	3.67517	3.67517	3.67517	3.67517	3.67517	3.67517
313	-0.69007	-0.123143	0.27404	0.511987	0.698504	0.867701	1.01094	1.19119	1.35858	1.52515	1.70888	1.87099	2.02468	2.14005	2.23946	2.33348	2.41528	2.49524	2.59682	2.67045	2.75019	2.80121	2.93131	3.0068	3.14053	3.19569	3.24612	3.3221	3.55028	3.6264	3.68067	3.77021	3.82686	3.8609	3.86227	3.94565	4.07667	4.15482	4.15482	4.15482	4.15482
314	0.313874	0.579551	0.885419	1.13801	1.28469	1.42395	1.67061	1.79085	1.88985	2.06818	2.18522	2.30023	2.44324	2.54416	2.66984	2.75864	2.95936	3.1108	3.21796	3.35633	3.46683	3.62677	3.68812	3.74526	3.7635	3.85559	3.91278	3.95724	4.00036	4.00036	4.00036	4.00036	4.00036	4.00036	4.00036	4.00036	4.00036	4.00036	4.00036	4.00036	4.00036
315	-1.22367	-0.781044	-0.377043	-0.0209061	0.359137	0.673306	0.941351	1.15267	1.41116	1.52119	1.77725	2.02044	2.15382	2.30705	2.43358	2.53532	2.62232	2.66219	2.77085	2.89706	3.06981	3.11422	3.16254	3.22439	3.33529	3.40787	3.44377	3.4747	3.50163	3.51924	3.52882	3.54795	3.62007	3.6501	3.68183	3.79979	3.80352	3.80352	3.80352	3.80352	3.80352
316	-1.38089	-1.16414	-0.191099	0.580464	0.860522	1.06147	1.31499	1.54807	1.6444	1.76731	1.9165	1.9989	2.0772	2.22357	2.36765	2.47946	2.59883	2.82648	2.98845	3.06678	3.1309	3.17338	3.24377	3.35032	3.43193	3.44933	3.45218	3.47038	3.49017	3.56792	3.65648	3.65648	3.65648	3.65648	3.65648	3.65648	3.65648	3.65648	3.65648	3.65648	3.65648
317	-1.29732	0.344244	0.735908	0.960281	1.16431	1.32879	1.48421	1.64842	1.8326	2.07423	2.23445	2.4895	2.59685	2.89854	2.9779	3.0509	3.15898	3.25983	3.35256	3.41616	3.4637	3.51444	3.5916	3.61643	3.61643	3.61643	3.61643	3.61643	3.61643	3.61643	3.61643	3.61643	3.61643	3.61643	3.61643	3.61643	3.61643	3.61643	3.61643	3.61643	3.61643
318	0.790585	1.23578	1.50741	1.80767	2.02734	2.2331	2.39036	2.49885	2.63718	2.75954	2.86081	3.02017	3.10226	3.15535	3.21867	3.38532	3.42768	3.48739	3.54162	3.65409	3.73461	3.83544	3.86191	3.90504	3.96188	3.99996	4.01437	4.01621	4.01621	4.01621	4.01621	4.01621	4.01621	4.01621	4.01621	4.01621	4.01621	4.01621	4.01621	4.01621	4.01621
319	-1.46409	-0.718368	0.276054	0.726521	0.957831	1.16992	1.39129	1.62345	1.80892	1.946	2.11618	2.26933	2.41635	2.58733	2.81168	2.93438	3.05436	3.18817	3.31416	3.43112	3.57982	3.68393	3.7806	3.8441	3.89225	3.95228	4.01469	4.07974	4.11983	4.13388	4.13388	4.13388	4.13388	4.13388	4.13388	4.13388	4.13388	4.13388	4.13388	4.13388	4.13388
320	0.0315851	0.494312	0.762598	0.982206	1.15156	1.35047	1.59814	1.76683	1.95198	2.13013	2.29979	2.43421	2.55848	2.67545	2.78741	2.90862	2.98218	3.04615	3.1071	3.22505	3.26543	3.31017	3.46469	3.51403	3.58145	3.62056	3.65083	3.67356	3.68563	3.7297	3.7307	3.77112	3.85832	4.15599	4.19981	4.19981	4.19981	4.19981	4.19981	4.19981	4.19981
321	-1.15749	0.89418	1.25516	1.55715	1.84631	2.14104	2.35918	2.58874	2.75489	2.87551	3.04822	3.19922	3.32563	3.40858	3.4792	3.60263	3.66545	3.73491	3.88243	3.92599	4.02701	4.13316	4.2382	4.24778	4.24778	4.24778	4.24778	4.24778	4.24778	4.24778	4.24778	4.24778	4.24778	4.24778	4.24778	4.24778	4.24778	4.24778	4.24778	4.24778	4.24778
322	-1.26041	0.346458	0.657531	0.935367	1.10852	1.30062	1.54085	1.73383	1.91495	2.03034	2.19985	2.31084	2.49116	2.58988	2.73286	2.85338	2.90846	2.92574	2.93714	2.97693	3.0384	3.09525	3.16518	3.19435	3.25484	3.25858	3.30476	3.40664	3.45219	3.49255	3.53597	3.58902	3.66679	3.70799	3.76984	3.78116	3.82937	3.82937	3.82937	3.82937	3.82937
323	-1.64913	0.399616	0.803169	1.12067	1.39687	1.58749	1.80997	1.97745	2.09608	2.19879	2.29933	2.4371	2.58638	2.80584	2.97664	3.07418	3.13608	3.49482	3.55761	3.66019	3.70886	3.73666	3.77454	3.87795	3.89569	3.89569	3.89569	3.89569	3.89569	3.89569	3.89569	3.89569	3.89569	3.89569	3.89569	3.89569	3.89569	3.89569	3.89569	3.89569	3.89569
324	0.780943	1.09787	1.31599	1.48774	1.68411	1.80622	1.97111	2.10389	2.29107	2.41288	2.52243	2.65182	2.73391	2.8406	2.93736	3.0097	3.06904	3.20922	3.28493	3.44101	3.51348	3.57111	3.6362	3.65952	3.69515	3.70905	3.74199	3.79153	3.79515	3.80139	3.80168	3.94169	3.97435	4.0282	4.23493	4.33481	4.33481	4.33481	4.33481	4.33481	4.33481
325	-0.0361462	1.00123	1.29511	1.57133	1.85041	2.02825	2.20957	2.37861	2.53407	2.73775	2.88013	3.00077	3.12312	3.26289	3.36935	3.51439	3.609	3.72428	3.83586	3.90595	3.96565	4.11139	4.14767	4.21035	4.21035	4.21035	4.21035	4.21035	4.21035	4.21035	4.21035	4.21035	4.21035	4.21035	4.21035	4.21035	4.21035	4.21035	4.21035	4.21035	4.21035
326	0.631238	0.995051	1.20488	1.34471	1.45281	1.57132	1.66934	1.80062	1.94295	2.02201	2.16821	2.38695	2.46306	2.55878	2.63109	2.69078	2.73615	2.7966	2.8289	2.8925	2.91925	2.92432	2.9796	3.03112	3.12889	3.12905	3.30303	3.30303	3.30303	3.30303	3.30303	3.30303	3.30303	3.30303	3.30303	3.30303	3.30303	3.30303	3.30303	3.30303	3.30303
327	-1.28625	-0.109504	0.411214	0.623868	0.798498	0.925659	1.04684	1.18714	1.50288	1.64452	1.82203	1.92604	2.07819	2.17566	2.27191	2.52466	2.68803	2.83488	3.03027	3.11561	3.24803	3.33798	3.41692	3.49462	3.52552	3.59859	3.61775	3.69461	3.83714	3.8872	3.92367	3.93938	4.03258	4.03472	4.03472	4.03472	4.03472	4.03472	4.03472	4.03472	4.03472
328	0.597253	0.987945	1.3325	1.55864	1.76379	1.964	2.17392	2.32444	2.52715	2.68999	2.80173	2.91004	2.99953	3.11857	3.24101	3.31214	3.37656	3.59505	3.65795	3.71306	3.73833	3.7594	3.76848	3.81853	3.84594	3.86242	3.96038	3.99798	4.10048	4.10048	4.10048	4.10048	4.10048	4.10048	4.10048	4.10048	4.10048	4.10048	4.10048	4.10048	4.10048
329	0.145764	0.565118	0.948555	1.21975	1.56574	1.79099	1.98094	2.14194	2.48838	2.62724	2.75699	2.88611	2.99883	3.09501	3.19056	3.27532	3.30533	3.35569	3.42462	3.52885	3.59865	3.68617	3.71977	3.73982	3.73982	3.73982	3.73982	3.73982	3.73982	3.73982	3.73982	3.73982	3.73982	3.73982	3.73982	3.73982	3.73982	3.73982	3.73982	3.73982	3.73982
330	-0.185481	0.372601	0.683974	0.9624	1.21453	1.4815	1.6749	1.82785	2.00097	2.1427	2.27681	2.40307	2.54886	2.76853	2.99464	3.15126	3.24713	3.34232	3.39819	3.4596	3.50511	3.53639	3.54478	3.5551	3.5551	3.5551	3.5551	3.5551	3.5551	3.5551	3.5551	3.5551	3.5551	3.5551	3.5551	3.5551	3.5551	3.5551	3.5551	3.5551	3.5551
331	-1.37348	-1.21204	-0.878175	-0.0670469	0.211316	0.489523	0.659905	0.83402	1.03878	1.20648	1.38766	1.5299	1.66327	1.78804	1.94455	2.10886	2.27778	2.40457	2.58307	2.81343	2.92705	3.02039	3.10496	3.19003	3.27034	3.34345	3.40513	3.49405	3.6406	3.68529	3.7726	3.92554	3.96416	3.99769	4.0373	4.04438	4.04438	4.04438	4.04438	4.04438	4.04438
332	-0.948217	-0.217292	0.38073	0.578256	0.753338	0.898921	1.03238	1.15238	1.22421	1.30973	1.41066	1.52389	1.60393	1.81415	2.13205	2.33648	2.45462	2.53289	2.64207	2.73644	2.81385	2.92064	3.00743	3.09246	3.13833	3.13833	3.13833	3.13833	3.13833	3.13833	3.13833	3.13833	3.13833	3.13833	3.13833	3.13833	3.13833	3.13833	3.13833	3.13833	3.13833
333	-1.55073	0.369543	0.638749	0.884721	1.12021	1.33537	1.53385	1.68253	1.79674	1.93123	2.07466	2.19841	2.41158	2.59164	2.78466	2.88631	3.02983	3.11564	3.23219	3.36765	3.66249	3.84617	3.93441	4.02679	4.11676	4.16353	4.19878	4.19878	4.19878	4.19878	4.19878	4.19878	4.19878	4.19878	4.19878	4.19878	4.19878	4.19878	4.19878	4.19878	4.19878
334	-0.406371	0.218975	0.501492	0.802442	1.17417	1.46143	1.6449	1.89633	2.1581	2.30957	2.46423	2.60175	2.73588	3.00684	3.22323	3.32686	3.57609	3.6976	3.74696	3.74696	3.74696	3.74696	3.74696	3.74696	3.74696	3.74696	3.74696	3.74696	3.74696	3.74696	3.74696	3.74696	3.74696	3.74696	3.74696	3.74696	3.74696	3.74696	3.74696	3.74696	3.74696
335	0.49511	0.804787	1.00574	1.19281	1.34599	1.46383	1.62232	1.7393	1.85386	2.03129	2.20281	2.3449	2.46331	2.57642	2.78639	2.98739	3.09708	3.19558	3.26867	3.40407	3.47114	3.59084	3.69557	3.78504	3.84014	3.90696	4.04927	4.09927	4.14031	4.15767	4.19095	4.21797	4.25174	4.25174	4.25174	4.25174	4.25174	4.25174	4.25174	4.25174	4.25174
336	-0.270802	0.273743	0.632092	0.940668	1.22502	1.5546	1.7982	2.04388	2.26517	2.44891	2.62175	2.75636	2.86574	2.97029	3.09173	3.18198	3.24397	3.29069	3.32906	3.42318	3.47564	3.48351	3.51913	3.52062	3.61594	3.73602	3.73602	3.73602	3.73602	3.73602	3.73602	3.73602	3.73602	3.73602	3.73602	3.73602	3.73602	3.73602	3.73602	3.73602	3.73602
337	-0.806281	0.136436	0.526325	0.86771	1.15403	1.49292	1.76397	1.95248	2.20502	2.34856	2.53284	2.6533	2.79211	2.93337	3.06344	3.22038	3.31896	3.41346	3.47796	3.52876	3.56808	3.59315	3.59315	3.59315	3.59315	3.59315	3.59315	3.59315	3.59315	3.59315	3.59315	3.59315	3.59315	3.59315	3.59315	3.59315	3.59315	3.59315	3.59315	3.59315	3.59315
338	-1.22984	-0.397806	-0.0652766	0.2893	0.503851	0.699187	0.932551	1.24327	1.42066	1.62243	1.80479	2.02674	2.23782	2.38151	2.51915	2.67496	2.87291	3.02774	3.11109	3.23534	3.30071	3.39068	3.44578	3.5576	3.60128	3.63102	3.63102	3.63102	3.63102	3.63102	3.63102	3.63102	3.63102	3.63102	3.63102	3.63102	3.63102	3.63102	3.63102	3.63102	3.63102
339	-0.0531446	0.847967	1.33254	1.58883	1.77081	1.92601	2.05339	2.20138	2.32571	2.51663	2.60849	2.68517	2.76229	2.82623	2.86701	3.0947	3.22553	3.26346	3.36456	3.42893	3.47272	3.50108	3.50998	3.59049	3.62288	3.65326	3.65326	3.65326	3.65326	3.65326	3.65326	3.65326	3.65326	3.65326	3.65326	3.65326	3.65326	3.65326	3.65326	3.65326	3.65326
340	0.598916	0.967096	1.17229	1.43497	1.61975	1.79854	1.96881	2.11632	2.2404	2.51453	2.62408	2.72224	2.8488	2.93996	3.0335	3.0995	3.16334	3.25779	3.34145	3.52129	3.64488	3.7385	3.85142	3.93898	4.05679	4.12213	4.17195	4.33802	4.36848	4.38018	4.38018	4.38018	4.38018	4.38018	4.38018	4.38018	4.38018	4.38018	4.38018	4.38018	4.38018
341	0.00978076	0.387012	0.701178	1.07284	1.37466	1.59769	1.75729	1.89413	2.04622	2.17295	2.29699	2.43224	2.58243	2.68321	2.78072	2.94769	3.07074	3.14596	3.24274	3.31932	3.49791	3.57497	3.65748	3.6621	3.67691	3.67691	3.67691	3.67691	3.67691	3.67691	3.67691	3.67691	3.67691	3.67691	3.67691	3.67691	3.67691	3.67691	3.67691	3.67691	3.67691
342	0.148362	1.15193	1.54877	1.6941	1.86052	1.95451	2.05132	2.13922	2.27352	2.36445	2.50004	2.59922	2.68646	2.83282	2.97029	3.13338	3.19275	3.2475	3.29522	3.48845	3.5961	3.61228	3.6528	3.69079	3.71012	3.78426	3.82245	3.82642	3.90746	3.90746	3.90746	3.90746	3.90746	3.90746	3.90746	3.90746	3.90746	3.90746	3.90746	3.90746	3.90746
343	-1.36088	0.805932	1.41867	1.63675	1.80246	1.96797	2.17261	2.33618	2.48601	2.58831	2.68461	2.76474	2.84051	2.95399	3.05803	3.13731	3.19333	3.26052	3.31749	3.35481	3.38208	3.44596	3.7014	3.7064	3.86579	4.01294	4.06133	4.1026	4.10284	4.10284	4.10284	4.10284	4.10284	4.10284	4.10284	4.10284	4.10284	4.10284	4.10284	4.10284	4.10284
344	0.374156	0.760582	1.09577	1.30022	1.52449	1.71174	1.85506	1.97816	2.06898	2.13565	2.20621	2.31129	2.39067	2.45859	2.54636	2.84512	2.94032	2.99035	3.16196	3.20568	3.43124	3.47594	3.5112	3.60677	3.63854	3.72323	3.75949	3.80023	3.80308	3.80308	3.80308	3.80308	3.80308	3.80308	3.80308	3.80308	3.80308	3.80308	3.80308	3.80308	3.80308
345	-0.902557	0.307079	0.588742	0.805452	0.998563	1.16021	1.30663	1.50463	1.71933	1.8419	1.96217	2.06803	2.18076	2.33019	2.44341	2.54276	2.63297	2.743	2.81969	3.02738	3.14856	3.32321	3.43226	3.4735	3.54902	3.67797	3.79372	3.85916	3.95997	3.9818	4.00107	4.00107	4.00107	4.00107	4.00107	4.00107	4.00107	4.00107	4.00107	4.00107	4.00107
346	-0.134017	0.456215	0.804199	1.03969	1.27963	1.58678	1.90473	2.08675	2.23407	2.3695	2.45462	2.55258	2.62944	2.74	2.79625	3.01967	3.06383	3.2574	3.40801	3.55521	3.68018	3.74964	3.7627	3.7627	3.7627	3.7627	3.7627	3.7627	3.7627	3.7627	3.7627	3.7627	3.7627	3.7627	3.7627	3.7627	3.7627	3.7627	3.7627	3.7627	3.7627
347	0.604683	0.965143	1.39454	1.76909	2.01855	2.20579	2.36889	2.51181	2.64658	2.75411	2.87728	2.98327	3.08851	3.15167	3.18655	3.29261	3.34452	3.38524	3.46841	3.68837	3.7852	3.7852	3.7852	3.7852	3.7852	3.7852	3.7852	3.7852	3.7852	3.7852	3.7852	3.7852	3.7852	3.7852	3.7852	3.7852	3.7852	3.7852	3.7852	3.7852	3.7852
348	-1.28906	-0.847881	-0.195374	0.296487	0.526131	0.738118	0.90796	1.07142	1.29671	1.45854	1.69679	1.84792	1.99596	2.13297	2.33211	2.45429	2.56248	2.65422	2.81849	2.97058	3.07898	3.12691	3.18961	3.24042	3.261	3.39043	3.65163	3.8413	3.87636	3.8969	3.90566	3.91914	3.91914	3.91914	3.91914	3.91914	3.91914	3.91914	3.91914	3.91914	3.91914
349	-1.52198	-1.23688	0.393803	0.783028	1.04747	1.29441	1.47082	1.65675	1.79318	1.91041	2.13648	2.30498	2.46966	2.57247	2.67319	2.76192	2.89639	2.95496	2.98238	3.04323	3.12072	3.17489	3.33916	3.4291	3.54122	3.67913	3.71801	3.71966	3.71966	3.71966	3.71966	3.71966	3.71966	3.71966	3.71966	3.71966	3.71966	3.71966	3.71966	3.71966	3.71966
350	-0.822384	0.119636	0.555812	0.882022	1.12425	1.3746	1.5664	1.74461	1.91386	2.04391	2.11693	2.20084	2.26381	2.39992	2.54587	2.66044	2.85001	2.98658	3.07802	3.15411	3.30974	3.33356	3.48019	3.76013	3.82284	3.82698	3.82743	3.90925	3.90925	3.90925	3.90925	3.90925	3.90925	3.90925	3.90925	3.90925	3.90925	3.90925	3.90925	3.90925	3.90925
351	-1.3	-0.48612	0.672115	1.22349	1.54347	1.73991	1.98962	2.19105	2.36005	2.69443	2.8152	2.94872	3.08965	3.23585	3.30943	3.37942	3.54539	3.64972	3.76172	3.83211	3.83211	3.83211	3.83211	3.83211	3.83211	3.83211	3.83211	3.83211	3.83211	3.83211	3.83211	3.83211	3.83211	3.83211	3.83211	3.83211	3.83211	3.83211	3.83211	3.83211	3.83211
352	0.661247	0.926898	1.11836	1.28775	1.44976	1.62097	1.80749	2.09668	2.29721	2.49394	2.60496	2.70127	2.81201	3.01048	3.11927	3.23411	3.26952	3.27554	3.36296	3.37354	3.4392	3.53632	3.56039	3.56153	3.56153	3.56153	3.56153	3.56153	3.56153	3.56153	3.56153	3.56153	3.56153	3.56153	3.56153	3.56153	3.56153	3.56153	3.56153	3.56153	3.56153
353	-0.162493	0.271222	0.460006	0.643772	0.821257	0.984362	1.22642	1.33544	1.49864	1.61704	1.73112	1.85899	1.97729	2.1891	2.32365	2.42661	2.53005	2.68055	2.77182	2.89078	2.94123	3.03695	3.13165	3.19547	3.22992	3.29909	3.42458	3.43481	3.4807	3.4807	3.4807	3.4807	3.4807	3.4807	3.4807	3.4807	3.4807	3.4807	3.4807	3.4807	3.4807
354	-1.60221	0.0311269	0.588974	0.919613	1.08827	1.2987	1.51515	1.65377	1.79782	1.95484	2.09213	2.19722	2.33715	2.61205	2.72483	2.8333	2.96076	3.07872	3.14597	3.40026	3.44651	3.53362	3.56582	3.62201	3.62201	3.62201	3.62201	3.62201	3.62201	3.62201	3.62201	3.62201	3.62201	3.62201	3.62201	3.62201	3.62201	3.62201	3.62201	3.62201	3.62201
355	0.400168	0.753899	0.954621	1.14002	1.39733	1.5437	1.80319	2.01827	2.1403	2.24081	2.31106	2.39568	2.45304	2.56652	2.61935	2.66849	2.77864	2.86006	2.97538	3.03753	3.07613	3.15011	3.19854	3.20984	3.25839	3.25839	3.25839	3.25839	3.25839	3.25839	3.25839	3.25839	3.25839	3.25839	3.25839	3.25839	3.25839	3.25839	3.25839	3.25839	3.25839
356	-1.62837	0.964311	1.29493	1.54877	1.7672	1.95995	2.09407	2.22551	2.33457	2.43711	2.55854	2.67576	2.76544	2.89613	3.14787	3.28431	3.44631	3.55988	3.71096	3.74834	3.7933	3.82148	3.94318	3.95429	3.98779	4.0335	4.08051	4.1455	4.1545	4.27604	4.31006	4.31006	4.31006	4.31006	4.31006	4.31006	4.31006	4.31006	4.31006	4.31006	4.31006
357	0.334968	0.560807	0.763256	0.937488	1.12512	1.26855	1.44783	1.61119	1.74433	2.01558	2.1444	2.26076	2.47277	2.65551	2.82171	2.99014	3.11168	3.20364	3.38753	3.6395	3.82608	3.91294	3.99605	4.02527	4.1	4.10727	4.11461	4.17865	4.34782	4.37079	4.37079	4.37079	4.37079	4.37079	4.37079	4.37079	4.37079	4.37079	4.37079	4.37079	4.37079
358	-1.52665	0.118232	0.549053	0.837166	1.09119	1.35638	1.55353	1.71337	2.07171	2.215	2.35629	2.4768	2.61557	2.72893	2.84557	2.95998	3.13342	3.25509	3.34772	3.44606	3.53175	3.60231	3.61663	3.63162	3.64531	3.66356	3.69709	3.74123	3.8023	3.82059	3.84239	3.88819	3.88819	3.88819	3.88819	3.88819	3.88819	3.88819	3.88819	3.88819	3.88819
359	-0.285476	0.3902	0.634169	0.822161	1.00596	1.19545	1.35274	1.51013	1.64399	1.78213	1.91044	2.03952	2.14245	2.23382	2.32214	2.46402	2.66297	2.84324	2.99253	3.10511	3.2597	3.38794	3.4064	3.48224	3.66568	3.79496	3.8233	3.95255	4.01251	4.03884	4.03884	4.03884	4.03884	4.03884	4.03884	4.03884	4.03884	4.03884	4.03884	4.03884	4.03884
360	-0.246545	0.472854	0.822405	1.10424	1.37927	1.60113	1.85792	2.12397	2.30417	2.45359	2.61627	2.76003	2.87581	2.99055	3.10185	3.23364	3.36036	3.48744	3.58119	3.60687	3.70194	3.8514	3.85892	3.94464	4.02751	4.02751	4.02751	4.02751	4.02751	4.02751	4.02751	4.02751	4.02751	4.02751	4.02751	4.02751	4.02751	4.02751	4.02751	4.02751	4.02751
361	-1.33005	-1.18484	-0.258827	0.0437032	0.316112	0.545552	0.741575	0.928111	1.16479	1.43481	1.62177	1.78497	1.91677	2.05983	2.24381	2.35264	2.52822	2.6498	2.75452	2.85477	2.9312	3.05238	3.15137	3.19294	3.2259	3.3224	3.34378	3.42427	3.48996	3.49769	3.5386	3.58422	3.61742	3.61742	3.61742	3.61742	3.61742	3.61742	3.61742	3.61742	3.61742
362	-1.37496	0.332558	0.796409	1.02154	1.31478	1.53688	1.65331	1.76612	1.8672	2.0566	2.19546	2.31751	2.40644	2.59172	2.77513	2.93156	3.00792	3.09088	3.1635	3.30263	3.45722	3.49611	3.68571	3.7424	3.77584	3.80773	3.80773	3.80773	3.80773	3.80773	3.80773	3.80773	3.80773	3.80773	3.80773	3.80773	3.80773	3.80773	3.80773	3.80773	3.80773
363	0.320662	0.703591	1.03921	1.23786	1.43094	1.62363	1.77693	1.9244	2.07337	2.29111	2.41088	2.55335	2.6742	2.77455	2.9354	3.06146	3.1458	3.21022	3.25923	3.32353	3.32502	3.36664	3.42421	3.49201	3.50987	3.51083	3.53651	3.58784	3.58784	3.58784	3.58784	3.58784	3.58784	3.58784	3.58784	3.58784	3.58784	3.58784	3.58784	3.58784	3.58784
364	-1.34516	-1.22254	-0.953762	0.509483	0.885457	1.14396	1.41315	1.59737	1.8291	2.04176	2.22273	2.38397	2.48046	2.58801	2.68574	2.82981	3.01365	3.18555	3.28255	3.40224	3.50507	3.54698	3.61502	3.63789	3.70755	3.72887	3.7384	3.80289	3.8069	3.84634	3.84634	3.84634	3.84634	3.84634	3.84634	3.84634	3.84634	3.84634	3.84634	3.84634	3.84634
365	-1.07972	0.0994083	0.591523	0.973284	1.28132	1.47032	1.63627	1.8202	2.00331	2.32467	2.50797	2.67568	2.85448	3.01801	3.09982	3.28301	3.3634	3.41719	3.46979	3.53174	3.58794	3.62712	3.64717	3.71047	3.75076	3.77776	3.81382	3.85519	3.93912	3.94961	3.94961	3.94961	3.94961	3.94961	3.94961	3.94961	3.94961	3.94961	3.94961	3.94961	3.94961
366	-0.706902	-0.0297031	0.268238	0.554275	0.767753	0.948029	1.05256	1.16862	1.26782	1.36311	1.46432	1.54962	1.62657	1.74394	1.82234	1.88662	1.9388	2.00197	2.08537	2.27609	2.55888	2.70994	2.81263	3.01103	3.14986	3.26399	3.36491	3.44949	3.64607	3.68288	3.74352	3.80063	3.92212	3.96413	3.97972	4.02128	4.03462	4.103	4.10348	4.12587	4.27583
367	-1.06551	-0.174419	0.525818	1.00264	1.21706	1.43058	1.5904	1.82952	1.98946	2.15535	2.46508	2.6092	2.82467	2.91266	3.02961	3.1617	3.31339	3.49744	3.53456	3.62389	3.64957	3.64957	3.64957	3.64957	3.64957	3.64957	3.64957	3.64957	3.64957	3.64957	3.64957	3.64957	3.64957	3.64957	3.64957	3.64957	3.64957	3.64957	3.64957	3.64957	3.64957
368	-1.54134	-0.0765097	0.740317	1.00661	1.23168	1.43983	1.60429	1.74494	1.91185	2.04532	2.28669	2.4189	2.57152	2.7003	2.80149	2.87447	2.929	3.0888	3.26051	3.30181	3.30181	3.30181	3.30181	3.30181	3.30181	3.30181	3.30181	3.30181	3.30181	3.30181	3.30181	3.30181	3.30181	3.30181	3.30181	3.30181	3.30181	3.30181	3.30181	3.30181	3.30181
369	0.457761	0.901529	1.21815	1.4263	1.62863	1.8939	2.08489	2.29532	2.47208	2.6069	2.74871	2.97107	3.0859	3.18007	3.30414	3.3792	3.45495	3.4854	3.52304	3.53703	3.56269	3.6111	3.66425	3.66425	3.66425	3.66425	3.66425	3.66425	3.66425	3.66425	3.66425	3.66425	3.66425	3.66425	3.66425	3.66425	3.66425	3.66425	3.66425	3.66425	3.66425
370	-0.381284	0.267695	0.567303	0.859632	1.07121	1.23993	1.38301	1.55467	1.782	1.97294	2.09538	2.22704	2.37782	2.54227	2.68085	2.80252	2.88387	2.96491	3.07491	3.13366	3.21933	3.28666	3.39527	3.45097	3.53435	3.60871	3.62953	3.75181	3.81138	3.86781	3.90434	3.92936	3.94704	3.95133	3.96016	3.98591	3.98972	4.02618	4.02618	4.02618	4.02618
371	0.113077	0.573828	0.902776	1.18175	1.40523	1.7204	1.90375	2.04854	2.15633	2.284	2.4492	2.5866	2.70605	2.82115	2.93325	3.10105	3.37908	3.59134	3.67074	3.93835	3.98763	4.11879	4.24522	4.26045	4.26344	4.26344	4.26344	4.26344	4.26344	4.26344	4.26344	4.26344	4.26344	4.26344	4.26344	4.26344	4.26344	4.26344	4.26344	4.26344	4.26344
372	-0.510178	0.0551043	0.430255	0.679007	0.872814	1.07458	1.27721	1.40472	1.54241	1.66258	1.76771	1.96448	2.12962	2.2162	2.32685	2.41787	2.48865	2.65687	2.73427	2.8335	2.91385	3.12637	3.26435	3.31867	3.36512	3.40904	3.60763	3.74094	3.81472	3.83746	3.91203	3.9728	3.9728	3.9728	3.9728	3.9728	3.9728	3.9728	3.9728	3.9728	3.9728
373	0.00990611	0.336169	0.594149	0.811362	1.07169	1.28979	1.5153	1.66418	1.80705	1.91853	2.01756	2.10903	2.22108	2.36057	2.45424	2.53895	2.61008	2.72323	2.80326	2.87243	2.93218	3.01855	3.15789	3.2733	3.3123	3.37046	3.40221	3.51477	3.52383	3.53842	3.59891	3.60674	3.64979	3.88338	3.93925	4.00154	4.01464	4.08369	4.24769	4.24769	4.24769
374	0.502002	0.829529	1.11717	1.38649	1.62257	1.79849	1.97634	2.1384	2.3264	2.59564	2.77807	2.94516	3.07055	3.1305	3.20266	3.26064	3.35297	3.52377	3.56976	3.61205	3.64105	3.6701	3.71069	3.76596	3.78776	3.80644	3.86921	3.90496	3.93159	3.95083	3.99788	4.00513	4.03443	4.0391	4.0391	4.0391	4.0391	4.0391	4.0391	4.0391	4.0391
375	-0.0440475	0.47279	0.717566	0.94625	1.15501	1.33285	1.68305	1.87347	2.03803	2.21638	2.33709	2.44549	2.56634	2.75698	2.92719	3.22087	3.34054	3.48433	3.53329	3.55454	3.57078	3.5976	3.64414	3.68655	3.70619	3.70619	3.70619	3.70619	3.70619	3.70619	3.70619	3.70619	3.70619	3.70619	3.70619	3.70619	3.70619	3.70619	3.70619	3.70619	3.70619
376	-1.28959	0.447753	0.7969	1.07346	1.26808	1.44952	1.5531	1.69855	1.83389	1.98535	2.159	2.29716	2.44651	2.60724	2.71911	2.94495	3.04889	3.14881	3.26525	3.45508	3.56223	3.58397	3.59482	3.62213	3.62213	3.62213	3.62213	3.62213	3.62213	3.62213	3.62213	3.62213	3.62213	3.62213	3.62213	3.62213	3.62213	3.62213	3.62213	3.62213	3.62213
377	-1.40876	0.00656337	0.727781	1.06681	1.30454	1.54146	1.80068	2.00867	2.1969	2.39462	2.556	2.76318	2.86862	2.94426	3.00594	3.06742	3.14362	3.29548	3.45638	3.50767	3.55983	3.61163	3.67736	3.73973	3.77222	3.79422	3.84199	3.89932	3.96499	3.98268	4.05961	4.08311	4.09483	4.09483	4.09483	4.09483	4.09483	4.09483	4.09483	4.09483	4.09483
378	-0.0870388	0.309765	0.553322	0.70876	0.898534	1.08747	1.22447	1.35644	1.46644	1.6057	1.90986	2.04695	2.27943	2.41571	2.57382	2.70491	2.83398	2.95352	3.03518	3.11516	3.27707	3.38624	3.42392	3.47665	3.51478	3.52394	3.59266	3.59526	3.62446	3.64311	3.67963	3.67963	3.67963	3.67963	3.67963	3.67963	3.67963	3.67963	3.67963	3.67963	3.67963
379	-0.660801	0.0323886	0.346739	0.590841	0.794936	1.0138	1.21959	1.35632	1.54248	1.80536	1.90347	1.9894	2.08174	2.20463	2.35296	2.4636	2.55482	2.64927	2.79542	2.88524	2.94492	3.02847	3.1801	3.27615	3.37581	3.41138	3.49231	3.52232	3.56566	3.62426	3.67125	3.72106	3.7602	3.82354	3.88289	3.93315	3.95187	4.0817	4.1313	4.1313	4.1313
380	-0.433883	0.375438	0.909511	1.16911	1.42148	1.57844	1.69215	1.85618	2.21399	2.3704	2.49816	2.57241	2.65991	2.79675	2.93476	3.00946	3.06702	3.18412	3.34854	3.44137	3.56604	3.60422	3.60863	3.76312	3.76312	3.76312	3.76312	3.76312	3.76312	3.76312	3.76312	3.76312	3.76312	3.76312	3.76312	3.76312	3.76312	3.76312	3.76312	3.76312	3.76312
381	-1.0784	0.130261	0.771511	1.02669	1.21279	1.42549	1.64704	1.83035	2.08032	2.25029	2.38631	2.51965	2.67275	2.78987	2.86997	2.96247	3.05007	3.12625	3.19381	3.28105	3.31172	3.47899	3.53639	3.70741	3.82501	3.83165	3.83473	3.97856	4.01759	4.01759	4.01759	4.01759	4.01759	4.01759	4.01759	4.01759	4.01759	4.01759	4.01759	4.01759	4.01759
382	-1.65395	-0.598466	-0.0777519	0.332954	0.690326	1.02621	1.32173	1.54666	1.69386	1.8958	2.03318	2.16784	2.29349	2.40544	2.46141	2.54731	2.70381	2.72105	2.80424	2.83849	2.85809	2.90535	2.98238	2.98238	2.98238	2.98238	2.98238	2.98238	2.98238	2.98238	2.98238	2.98238	2.98238	2.98238	2.98238	2.98238	2.98238	2.98238	2.98238	2.98238	2.98238
383	0.163996	0.486959	0.767405	1.05212	1.27359	1.43864	1.59727	1.79997	1.90391	2.00727	2.1279	2.26757	2.35441	2.43879	2.51282	2.74046	2.80559	2.85848	3.10958	3.19152	3.24831	3.29751	3.46746	3.55216	3.59007	3.60634	3.62114	3.75931	3.85196	3.90287	3.98005	4.06089	4.06089	4.06089	4.06089	4.06089	4.06089	4.06089	4.06089	4.06089	4.06089
384	-1.31275	0.315983	0.618826	0.8551	1.06435	1.26615	1.44542	1.64665	1.79531	2.00372	2.25991	2.46332	2.65771	2.83572	2.92867	3.11001	3.17703	3.35863	3.44236	3.52315	3.61078	3.68938	3.75627	3.82819	3.99933	4.07132	4.09433	4.11592	4.11938	4.11938	4.11938	4.11938	4.11938	4.11938	4.11938	4.11938	4.11938	4.11938	4.11938	4.11938	4.11938
385	-0.158567	0.218125	0.489034	0.719917	0.992294	1.18291	1.35263	1.56406	1.85159	2.03422	2.22816	2.4015	2.51941	2.67941	2.79886	2.92965	2.99409	3.19469	3.32096	3.45978	3.50183	3.54559	3.61588	3.66604	3.69639	3.71461	3.71968	3.71968	3.71968	3.71968	3.71968	3.71968	3.71968	3.71968	3.71968	3.71968	3.71968	3.71968	3.71968	3.71968	3.71968
386	-1.30562	-0.920213	-0.320524	0.97314	1.21744	1.42553	1.55924	1.70756	1.84188	2.10285	2.28112	2.40236	2.52509	2.63177	2.79803	2.97023	3.08234	3.1761	3.31782	3.38339	3.44991	3.49489	3.53817	3.55106	3.6098	3.70116	3.71354	3.72348	3.76818	3.80568	3.81502	3.84174	3.8462	3.8462	3.8462	3.8462	3.8462	3.8462	3.8462	3.8462	3.8462
387	-1.40684	0.677153	1.09489	1.45424	1.70353	1.94432	2.13005	2.30987	2.48559	2.58557	2.65999	2.71947	2.79864	2.84743	2.94788	2.99947	3.14248	3.34641	3.42465	3.48689	3.59453	3.81015	3.86115	3.88505	3.90317	3.96211	3.98883	3.98883	3.98883	3.98883	3.98883	3.98883	3.98883	3.98883	3.98883	3.98883	3.98883	3.98883	3.98883	3.98883	3.98883
388	-1.25214	-0.864272	0.705362	1.00376	1.22311	1.42834	1.62405	1.83283	2.01583	2.38185	2.62854	2.85208	2.97617	3.05545	3.14764	3.24431	3.29729	3.3458	3.39049	3.49932	3.67456	3.8451	4.00104	4.11268	4.25662	4.32656	4.38436	4.38436	4.38436	4.38436	4.38436	4.38436	4.38436	4.38436	4.38436	4.38436	4.38436	4.38436	4.38436	4.38436	4.38436
389	-0.0582555	0.419889	0.729811	0.94388	1.08118	1.17944	1.3579	1.46084	1.5673	1.66317	1.73798	1.83876	1.97107	2.11917	2.23114	2.32914	2.54035	2.66045	2.86533	3.11764	3.25605	3.33666	3.41438	3.62797	3.79162	3.86419	3.96484	3.99457	4.01136	4.06888	4.1196	4.17348	4.21248	4.3287	4.34581	4.34581	4.34581	4.34581	4.34581	4.34581	4.34581
390	-1.40641	-1.0946	-0.679855	-0.174746	0.641809	0.961409	1.18164	1.39986	1.60932	1.83723	2.03031	2.22361	2.40404	2.57897	2.72713	2.85816	2.99576	3.07866	3.13273	3.16744	3.25703	3.37591	3.49014	3.49014	3.49014	3.49014	3.49014	3.49014	3.49014	3.49014	3.49014	3.49014	3.49014	3.49014	3.49014	3.49014	3.49014	3.49014	3.49014	3.49014	3.49014
391	-0.195989	0.246807	0.560979	0.81303	0.991497	1.15817	1.30988	1.53297	1.75912	1.93462	2.07598	2.17414	2.38376	2.53522	2.69051	2.7732	2.86775	2.92237	2.98022	3.01915	3.10624	3.19391	3.24814	3.31688	3.33727	3.38266	3.44041	3.50502	3.60881	3.64878	3.65038	3.72334	3.75823	3.79169	3.80968	3.8204	3.84006	3.84482	3.84482	3.84482	3.84482
392	-1.54875	0.0550311	0.478718	0.710114	1.01265	1.3838	1.67644	1.89318	2.09455	2.27908	2.52156	2.64579	2.75979	2.8943	2.94869	3.07734	3.16965	3.20658	3.32348	3.35948	3.39223	3.41952	3.43704	3.44745	3.47729	3.48153	3.48153	3.48153	3.48153	3.48153	3.48153	3.48153	3.48153	3.48153	3.48153	3.48153	3.48153	3.48153	3.48153	3.48153	3.48153
393	-0.0593629	0.731276	0.999322	1.16153	1.33484	1.50603	1.64806	1.83622	1.97337	2.09861	2.23389	2.35504	2.43251	2.52597	2.62535	2.80677	2.93437	2.968	3.06284	3.11301	3.19093	3.23909	3.33846	3.41167	3.45182	3.50403	3.77082	3.78956	3.83608	3.94533	4.10844	4.10844	4.10844	4.10844	4.10844	4.10844	4.10844	4.10844	4.10844	4.10844	4.10844
394	-1.41528	-0.278449	1.10459	1.50404	1.81433	2.10275	2.4103	2.57495	2.73767	2.86743	3.00579	3.25121	3.36083	3.42739	3.47248	3.54687	3.63785	3.67389	3.77214	3.77214	3.77214	3.77214	3.77214	3.77214	3.77214	3.77214	3.77214	3.77214	3.77214	3.77214	3.77214	3.77214	3.77214	3.77214	3.77214	3.77214	3.77214	3.77214	3.77214	3.77214	3.77214
395	-1.58672	0.696378	0.97359	1.24002	1.48915	1.68553	1.8411	2.0372	2.17188	2.35404	2.48548	2.60902	2.74427	2.96273	3.21719	3.35538	3.46917	3.57112	3.64366	3.77873	3.90356	3.91854	3.95006	3.95006	3.95006	3.95006	3.95006	3.95006	3.95006	3.95006	3.95006	3.95006	3.95006	3.95006	3.95006	3.95006	3.95006	3.95006	3.95006	3.95006	3.95006
396	0.18747	0.552473	0.805063	1.04379	1.21932	1.36177	1.52194	1.67365	1.82176	1.96691	2.11746	2.33753	2.51468	2.70141	2.84364	2.96071	3.09009	3.17652	3.30568	3.46941	3.55086	3.60448	3.6169	3.62955	3.70007	3.76741	3.80161	3.84008	3.85386	3.85386	3.85386	3.85386	3.85386	3.85386	3.85386	3.85386	3.85386	3.85386	3.85386	3.85386	3.85386
397	-1.11	0.164069	0.605297	0.864259	1.08058	1.25078	1.4136	1.56504	1.71554	1.86485	2.05348	2.17239	2.30565	2.4906	2.60845	2.78452	2.90828	3.06497	3.23245	3.36505	3.55186	3.64161	3.72651	3.80804	3.87215	3.90057	3.99781	4.03065	4.06207	4.06207	4.06207	4.06207	4.06207	4.06207	4.06207	4.06207	4.06207	4.06207	4.06207	4.06207	4.06207
398	-0.126841	0.433546	0.825948	1.05542	1.34549	1.54889	1.73558	1.91774	2.10293	2.24595	2.38267	2.48372	2.6216	2.71586	2.80414	2.86303	2.92423	2.98507	3.06186	3.10672	3.23299	3.33897	3.39702	3.73135	3.74688	3.787	3.80863	3.80971	3.82828	3.82828	3.82828	3.82828	3.82828	3.82828	3.82828	3.82828	3.82828	3.82828	3.82828	3.82828	3.82828
399	-1.25437	0.670644	1.03407	1.34502	1.53603	1.68243	2.00515	2.14982	2.31445	2.52712	2.70191	2.86422	3.00569	3.10539	3.18851	3.22621	3.26994	3.39272	3.53216	3.54448	3.67399	3.75006	3.7794	3.84838	3.9086	3.91451	4.01862	4.01862	4.01862	4.01862	4.01862	4.01862	4.01862	4.01862	4.01862	4.01862	4.01862	4.01862	4.01862	4.01862	4.01862
400	-0.634873	0.0918674	0.502215	0.868337	1.10074	1.26416	1.45858	1.61247	1.8133	1.98056	2.13198	2.22686	2.36411	2.51013	2.60095	2.6921	2.81184	2.8344	2.8854	3.0528	3.25178	3.34697	3.4099	3.50821	3.55697	3.65019	3.72991	3.79486	3.81165	3.81165	3.81165	3.81165	3.81165	3.81165	3.81165	3.81165	3.81165	3.81165	3.81165	3.81165	3.81165
401	-0.920213	-0.789064	-0.0449517	0.821302	1.07726	1.34077	1.55433	1.80342	2.04559	2.25094	2.41502	2.55191	2.7167	2.87611	3.07792	3.16668	3.22598	3.38922	3.62903	3.75382	3.81604	3.81604	3.81604	3.81604	3.81604	3.81604	3.81604	3.81604	3.81604	3.81604	3.81604	3.81604	3.81604	3.81604	3.81604	3.81604	3.81604	3.81604	3.81604	3.81604	3.81604
402	-1.45445	-0.653363	0.312992	0.978857	1.41908	1.57765	1.73172	2.01471	2.16545	2.37483	2.52838	2.66845	2.78323	2.93272	3.1543	3.26233	3.33379	3.37579	3.39243	3.41033	3.45055	3.46745	3.56535	3.61799	3.69614	3.70609	3.74137	3.94121	3.97328	3.98244	4.01809	4.15928	4.26068	4.27785	4.27785	4.27785	4.27785	4.27785	4.27785	4.27785	4.27785
403	-0.139125	0.357889	0.563626	0.76068	1.0161	1.27598	1.45472	1.71945	1.89083	2.05555	2.17672	2.29806	2.44637	2.59812	2.73907	2.95739	3.04565	3.14224	3.21378	3.29625	3.3794	3.47281	3.52623	3.56861	3.60191	3.8209	3.83437	3.96678	4.03676	4.046	4.10497	4.17243	4.2127	4.23897	4.23897	4.23897	4.23897	4.23897	4.23897	4.23897	4.23897
404	-1.37135	-0.660577	-0.142401	0.180398	0.406948	0.612495	0.788705	0.952254	1.14891	1.3202	1.41435	1.56596	1.70274	1.88816	2.06348	2.16871	2.32066	2.40166	2.52165	2.65191	2.79634	2.80599	2.90491	2.9337	3.01736	3.02895	3.30516	3.35629	3.37155	3.39399	3.5053	3.53336	3.53855	3.6556	3.6556	3.6556	3.6556	3.6556	3.6556	3.6556	3.6556
405	-1.465	-0.200227	0.809257	1.17982	1.4544	1.64595	1.83402	1.98978	2.17039	2.31689	2.50027	2.71668	2.85579	2.97319	3.0568	3.14375	3.31212	3.4385	3.53915	3.60983	3.65544	3.77854	3.82561	3.86119	3.89952	3.97152	3.97152	3.97152	3.97152	3.97152	3.97152	3.97152	3.97152	3.97152	3.97152	3.97152	3.97152	3.97152	3.97152	3.97152	3.97152
406	-1.4261	-1.2517	-0.587023	0.598866	0.97293	1.32661	1.48959	1.61159	1.75841	1.8723	1.97649	2.16036	2.29221	2.44965	2.62733	2.76919	2.85609	2.97358	3.05141	3.09227	3.14361	3.26053	3.39228	3.51935	3.54842	3.59873	3.59873	3.59873	3.59873	3.59873	3.59873	3.59873	3.59873	3.59873	3.59873	3.59873	3.59873	3.59873	3.59873	3.59873	3.59873
407	0.347397	0.807676	1.07448	1.26443	1.52693	1.68973	1.83456	2.17499	2.34242	2.51377	2.65786	2.82227	3.0091	3.12669	3.21334	3.31307	3.35577	3.38077	3.40179	3.40179	3.40179	3.40179	3.40179	3.40179	3.40179	3.40179	3.40179	3.40179	3.40179	3.40179	3.40179	3.40179	3.40179	3.40179	3.40179	3.40179	3.40179	3.40179	3.40179	3.40179	3.40179
408	-1.01378	-0.0375805	0.223473	0.475632	0.713173	0.916142	1.12006	1.31614	1.56852	1.80001	2.06655	2.29037	2.47262	2.61194	2.76038	2.88241	3.03419	3.14915	3.35155	3.44372	3.55907	3.67312	3.71705	3.78193	3.82496	3.87127	3.87127	3.87127	3.87127	3.87127	3.87127	3.87127	3.87127	3.87127	3.87127	3.87127	3.87127	3.87127	3.87127	3.87127	3.87127
409	0.320862	0.563997	0.772381	1.01956	1.2193	1.38655	1.53866	1.76705	1.93099	2.07919	2.23295	2.51966	2.75873	2.91655	3.11095	3.35032	3.50348	3.65487	3.74903	3.86437	3.95318	4.07071	4.1707	4.20718	4.20718	4.20718	4.20718	4.20718	4.20718	4.20718	4.20718	4.20718	4.20718	4.20718	4.20718	4.20718	4.20718	4.20718	4.20718	4.20718	4.20718
410	-1.26728	-0.747734	0.19549	0.73669	0.990897	1.39932	1.63472	1.8038	1.95899	2.14088	2.30511	2.4858	2.63361	2.76387	2.87895	2.98756	3.183	3.32417	3.4383	3.51317	3.64067	3.9763	4.13514	4.18663	4.24411	4.2775	4.29591	4.29591	4.29591	4.29591	4.29591	4.29591	4.29591	4.29591	4.29591	4.29591	4.29591	4.29591	4.29591	4.29591	4.29591
411	0.825523	1.17216	1.35958	1.57097	1.74254	1.93907	2.0847	2.24876	2.36704	2.47713	2.6268	2.73949	2.86134	2.94686	3.03008	3.27055	3.33839	3.38241	3.5275	3.54396	3.54396	3.54396	3.54396	3.54396	3.54396	3.54396	3.54396	3.54396	3.54396	3.54396	3.54396	3.54396	3.54396	3.54396	3.54396	3.54396	3.54396	3.54396	3.54396	3.54396	3.54396
412	0.371846	0.731603	1.03624	1.26769	1.48929	1.67345	1.83797	1.99858	2.16963	2.27009	2.35561	2.45994	2.55423	2.62224	2.75849	2.88408	3.07475	3.13338	3.16934	3.25079	3.29162	3.35088	3.35711	3.37627	3.37627	3.37627	3.37627	3.37627	3.37627	3.37627	3.37627	3.37627	3.37627	3.37627	3.37627	3.37627	3.37627	3.37627	3.37627	3.37627	3.37627
413	-0.881021	-0.206285	0.290526	0.696145	0.998896	1.21536	1.42011	1.57102	1.73836	1.92337	2.0707	2.22244	2.34874	2.4457	2.54117	2.6279	2.72145	2.84639	3.07197	3.30631	3.43091	3.59387	3.67626	3.75483	3.75617	3.75617	3.75617	3.75617	3.75617	3.75617	3.75617	3.75617	3.75617	3.75617	3.75617	3.75617	3.75617	3.75617	3.75617	3.75617	3.75617
414	0.112483	0.763597	1.07262	1.37431	1.67615	1.93311	2.10143	2.29874	2.56564	2.78872	2.96157	3.10332	3.19295	3.32838	3.42687	3.49969	3.63244	3.74113	3.88503	3.95828	4.03434	4.1046	4.19578	4.20947	4.22911	4.23659	4.25504	4.32027	4.3229	4.32452	4.43836	4.44299	4.44299	4.44299	4.44299	4.44299	4.44299	4.44299	4.44299	4.44299	4.44299
415	-1.1758	-0.397976	0.551977	0.741521	0.884705	1.00055	1.16093	1.3121	1.41107	1.53085	1.69357	1.79947	1.89303	1.9942	2.1137	2.17185	2.30549	2.41521	2.57019	2.62661	2.7134	2.80904	2.87266	2.95059	3.00165	3.14129	3.15444	3.29093	3.32978	3.36998	3.39422	3.44492	3.58199	3.59199	3.59918	3.59918	3.59918	3.59918	3.59918	3.59918	3.59918
416	-0.172996	0.165035	0.483233	0.812102	1.00529	1.22754	1.43653	1.65971	1.81145	1.94937	2.09208	2.21317	2.38661	2.53463	2.6799	2.82569	2.92372	3.00347	3.11908	3.21932	3.28968	3.3436	3.41267	3.47378	3.54865	3.56972	3.56972	3.56972	3.56972	3.56972	3.56972	3.56972	3.56972	3.56972	3.56972	3.56972	3.56972	3.56972	3.56972	3.56972	3.56972
417	-1.25811	-0.811491	0.0469493	0.679986	0.97345	1.31392	1.53094	1.7049	1.94393	2.14442	2.40226	2.5679	2.85636	2.98786	3.10417	3.22223	3.36681	3.52282	3.6388	3.72483	3.77743	3.78707	3.82145	3.91742	3.91817	3.91817	3.91817	3.91817	3.91817	3.91817	3.91817	3.91817	3.91817	3.91817	3.91817	3.91817	3.91817	3.91817	3.91817	3.91817	3.91817
418	-0.0743207	0.585438	0.941536	1.22378	1.54665	1.80178	2.03562	2.23675	2.44642	2.69815	2.95789	3.14755	3.27023	3.3764	3.44047	3.54562	3.70713	3.83906	3.86549	3.91662	3.96174	3.98874	4.02073	4.02073	4.02073	4.02073	4.02073	4.02073	4.02073	4.02073	4.02073	4.02073	4.02073	4.02073	4.02073	4.02073	4.02073	4.02073	4.02073	4.02073	4.02073
419	-1.14314	0.706872	1.14586	1.4499	1.88459	2.15892	2.33049	2.47109	2.57207	2.67231	2.7515	2.82757	2.89855	3.08384	3.27766	3.42069	3.54606	3.58545	3.63527	3.74399	3.86444	3.9161	3.96861	4.01422	4.07522	4.09897	4.18234	4.20173	4.20173	4.20173	4.20173	4.20173	4.20173	4.20173	4.20173	4.20173	4.20173	4.20173	4.20173	4.20173	4.20173
420	-1.42859	0.858131	1.24473	1.40914	1.55192	1.72883	2.01758	2.16448	2.33012	2.43339	2.52975	2.61758	2.69748	2.80472	2.89444	2.96474	2.99074	3.08125	3.10816	3.11934	3.15806	3.17831	3.1808	3.1808	3.1808	3.1808	3.1808	3.1808	3.1808	3.1808	3.1808	3.1808	3.1808	3.1808	3.1808	3.1808	3.1808	3.1808	3.1808	3.1808	3.1808
421	-1.17555	-0.616014	-0.0764317	0.236054	0.544221	0.758077	1.03576	1.19981	1.39011	1.51243	1.63342	1.78939	1.90311	2.08899	2.3089	2.47675	2.6041	2.71456	2.79027	2.86307	2.97883	3.14523	3.28066	3.38786	3.47291	3.58645	3.64145	3.71335	3.71335	3.71335	3.71335	3.71335	3.71335	3.71335	3.71335	3.71335	3.71335	3.71335	3.71335	3.71335	3.71335
422	-1.48604	-1.25827	-0.664572	0.163497	0.446609	0.721164	0.912897	1.09517	1.25703	1.49184	1.66695	1.83178	1.95389	2.05617	2.20778	2.34415	2.52071	2.68829	2.76722	2.85691	2.93102	2.9959	3.06242	3.2398	3.35283	3.39339	3.56084	3.66665	3.70453	3.71546	3.74345	3.80379	3.80379	3.80379	3.80379	3.80379	3.80379	3.80379	3.80379	3.80379	3.80379
423	-0.92588	0.606657	1.17343	1.40675	1.61565	1.81852	1.98005	2.11734	2.23063	2.41381	2.6144	2.83825	3.01012	3.13308	3.25303	3.32436	3.47665	3.50917	3.53902	3.61459	3.64545	3.75981	3.80009	3.96131	3.98617	4.066	4.11084	4.13407	4.16166	4.16237	4.16237	4.16237	4.16237	4.16237	4.16237	4.16237	4.16237	4.16237	4.16237	4.16237	4.16237
424	0.0568458	0.469128	0.77861	1.02654	1.24893	1.36926	1.50466	1.63027	1.77123	1.97967	2.09459	2.26489	2.42209	2.58956	2.69465	2.76776	2.89216	2.9881	3.13946	3.44556	3.66159	3.73139	3.79884	3.85614	4.11401	4.16218	4.17317	4.21656	4.27424	4.33658	4.38731	4.4803	4.53803	4.53803	4.53803	4.53803	4.53803	4.53803	4.53803	4.53803	4.53803
425	-1.32578	-0.57948	0.378333	0.557621	0.687192	0.891747	1.29946	1.64242	1.81776	1.97226	2.10584	2.21997	2.37131	2.49775	2.6451	2.75047	2.8427	2.96227	3.04047	3.09201	3.11667	3.12701	3.12922	3.12922	3.12922	3.12922	3.12922	3.12922	3.12922	3.12922	3.12922	3.12922	3.12922	3.12922	3.12922	3.12922	3.12922	3.12922	3.12922	3.12922	3.12922
426	-1.12182	0.207559	0.576329	0.889085	1.19075	1.46504	1.71062	1.90433	2.14841	2.28339	2.41964	2.5455	2.84626	3.07236	3.25826	3.34088	3.38204	3.42983	3.47094	3.51652	3.55652	3.60635	3.69583	3.83393	3.84156	3.84156	3.84156	3.84156	3.84156	3.84156	3.84156	3.84156	3.84156	3.84156	3.84156	3.84156	3.84156	3.84156	3.84156	3.84156	3.84156
427	0.380483	1.05778	1.29477	1.48507	1.63661	1.76705	1.94981	2.10382	2.2905	2.48357	2.62991	2.79389	2.86406	2.92601	3.01581	3.11076	3.16193	3.21431	3.38356	3.4735	3.56482	3.61087	3.6712	3.71789	3.74932	3.74932	3.74932	3.74932	3.74932	3.74932	3.74932	3.74932	3.74932	3.74932	3.74932	3.74932	3.74932	3.74932	3.74932	3.74932	3.74932
428	-0.433883	0.375438	0.909511	1.16911	1.42148	1.57844	1.69215	1.85618	2.21399	2.3704	2.49816	2.57241	2.65991	2.79675	2.93476	3.00946	3.06702	3.18412	3.34854	3.44137	3.56604	3.60422	3.60863	3.76312	3.76312	3.76312	3.76312	3.76312	3.76312	3.76312	3.76312	3.76312	3.76312	3.76312	3.76312	3.76312	3.76312	3.76312	3.76312	3.76312	3.76312
429	-0.616231	-0.068206	0.260678	0.512442	0.702994	0.928614	1.2822	1.40638	1.57805	1.76526	1.93959	2.08575	2.17857	2.27175	2.5238	2.75268	2.85045	2.91927	3.02499	3.06876	3.07358	3.15128	3.29867	3.41706	3.5775	3.7422	3.91812	4.03099	4.0597	4.08542	4.12371	4.14502	4.14502	4.14502	4.14502	4.14502	4.14502	4.14502	4.14502	4.14502	4.14502
430	0.353076	0.652967	0.905876	1.13044	1.3179	1.4885	1.64181	1.77493	1.89091	1.98867	2.09881	2.17137	2.26912	2.36745	2.46587	2.63199	2.71894	2.80324	2.87497	2.92585	3.14814	3.26745	3.32928	3.40383	3.47214	3.56003	3.66137	3.73449	3.78635	3.79553	3.85379	3.90165	3.93194	3.93194	3.93194	3.93194	3.93194	3.93194	3.93194	3.93194	3.93194
431	0.166607	0.573601	0.961482	1.27333	1.45208	1.58	1.70969	1.80396	1.99944	2.13584	2.24206	2.35265	2.46751	2.54929	2.62219	2.7835	2.89231	3.03899	3.14328	3.22225	3.35965	3.42204	3.51549	3.57525	3.62823	3.65992	3.69616	3.72029	3.75843	3.90652	3.92522	3.94017	3.94017	3.94017	3.94017	3.94017	3.94017	3.94017	3.94017	3.94017	3.94017
432	-1.3729	-0.0512053	0.33295	0.642829	0.905562	1.1075	1.42774	1.59344	1.75561	1.91236	2.05722	2.18802	2.3758	2.52396	2.61767	2.76402	2.82221	2.9008	2.94503	2.98316	3.05744	3.12691	3.3066	3.35382	3.442	3.51346	3.58	3.6072	3.64858	3.64858	3.64858	3.64858	3.64858	3.64858	3.64858	3.64858	3.64858	3.64858	3.64858	3.64858	3.64858
433	-1.17805	-0.11352	0.549682	0.809531	1.01101	1.17967	1.3465	1.56221	1.76085	1.94617	2.12804	2.30111	2.52164	2.72796	2.87435	3.00484	3.12495	3.27248	3.37088	3.63232	3.71068	3.75076	3.79528	3.8358	3.84068	3.84693	3.92278	3.95893	3.97409	4.01031	4.05125	4.08971	4.17618	4.17618	4.17618	4.17618	4.17618	4.17618	4.17618	4.17618	4.17618
434	0.230248	0.526495	0.791478	1.05348	1.25612	1.50267	1.7195	1.94951	2.34452	2.49236	2.68363	2.85996	3.01567	3.25588	3.41084	3.50633	3.69954	3.81302	3.89271	3.93106	4.00955	4.07517	4.12511	4.34937	4.37411	4.46282	4.49282	4.52476	4.55617	4.55617	4.55617	4.55617	4.55617	4.55617	4.55617	4.55617	4.55617	4.55617	4.55617	4.55617	4.55617
435	-1.26563	0.179375	0.649944	0.981988	1.16742	1.41772	1.56553	1.70895	1.8321	1.95565	2.14947	2.30502	2.45407	2.60403	2.7302	2.86219	2.97187	3.10844	3.22948	3.30637	3.59001	3.71113	3.82087	3.91085	3.95861	4.04334	4.14452	4.14452	4.14452	4.14452	4.14452	4.14452	4.14452	4.14452	4.14452	4.14452	4.14452	4.14452	4.14452	4.14452	4.14452
436	-0.841003	0.265792	0.480916	0.695679	0.957497	1.16725	1.31466	1.61231	1.78285	1.92717	2.0923	2.26567	2.41413	2.50386	2.58764	2.84473	2.94795	3.13949	3.28487	3.36301	3.46959	3.53053	3.67323	3.8655	4.00367	4.01681	4.05284	4.16336	4.217	4.217	4.217	4.217	4.217	4.217	4.217	4.217	4.217	4.217	4.217	4.217	4.217
437	-0.143489	0.151573	0.485569	0.732047	0.96338	1.15151	1.32724	1.60752	1.7706	1.90793	2.23184	2.34211	2.47619	2.57458	2.7829	2.87623	3.03915	3.14329	3.28898	3.37287	3.43355	3.48699	3.52229	3.53622	3.69774	3.72291	3.72291	3.72291	3.72291	3.72291	3.72291	3.72291	3.72291	3.72291	3.72291	3.72291	3.72291	3.72291	3.72291	3.72291	3.72291
438	-0.235841	0.331399	0.815268	0.999042	1.2002	1.35846	1.50142	1.63714	1.81488	1.96163	2.0827	2.18343	2.29656	2.38451	2.49511	2.59854	2.69258	2.79608	2.88448	2.94842	3.02842	3.13006	3.18803	3.32345	3.46566	3.5182	3.56498	3.62363	3.66161	3.69766	3.74016	3.96132	3.98499	3.99074	4.08293	4.10283	4.21405	4.25265	4.28103	4.33564	4.36111
439	0.349621	0.884803	1.11758	1.44724	1.72196	2.07731	2.32445	2.5391	2.72401	2.90231	3.03269	3.13783	3.21171	3.30652	3.38722	3.46285	3.53032	3.6205	3.65679	3.70122	3.80786	3.88143	3.89775	3.93988	4.03836	4.05696	4.07358	4.07965	4.07965	4.07965	4.07965	4.07965	4.07965	4.07965	4.07965	4.07965	4.07965	4.07965	4.07965	4.07965	4.07965
440	0.197599	0.768504	0.980898	1.33609	1.50512	1.66274	1.76956	1.86174	1.9363	2.07051	2.21031	2.39965	2.57404	2.77456	2.9354	3.08806	3.17168	3.28042	3.3648	3.44291	3.51191	3.62303	3.69686	3.76629	3.77627	3.78969	3.81071	3.81466	3.93112	3.99582	3.99582	3.99582	3.99582	3.99582	3.99582	3.99582	3.99582	3.99582	3.99582	3.99582	3.99582
441	-1.48132	-0.163945	0.267479	0.575775	0.80957	1.12092	1.35272	1.6133	1.83276	2.03199	2.18732	2.36527	2.53241	2.72108	2.85478	2.96289	3.05954	3.21391	3.31844	3.43003	3.47974	3.50757	3.53605	3.6191	3.66787	3.67871	3.70219	3.73004	3.803	3.80473	3.86868	3.95047	4.02782	4.06602	4.1443	4.218	4.24006	4.24006	4.24006	4.24006	4.24006
442	-1.1615	-0.712802	0.946201	1.18083	1.40061	1.57055	1.84916	2.00618	2.29726	2.55351	2.7348	2.89123	3.02734	3.18688	3.30014	3.39388	3.47557	3.57273	3.77004	3.88477	3.92697	3.96081	4.15058	4.20692	4.20692	4.20692	4.20692	4.20692	4.20692	4.20692	4.20692	4.20692	4.20692	4.20692	4.20692	4.20692	4.20692	4.20692	4.20692	4.20692	4.20692
443	-1.43252	-1.13826	-0.920213	-0.492915	0.562724	0.969468	1.16468	1.39686	1.76088	1.97758	2.20028	2.37772	2.52876	2.66125	2.78611	2.90077	3.02114	3.14472	3.26726	3.42306	3.50301	3.57862	3.68305	3.79726	3.83012	3.88019	3.96585	4.02	4.04468	4.04468	4.04468	4.04468	4.04468	4.04468	4.04468	4.04468	4.04468	4.04468	4.04468	4.04468	4.04468
444	-1.54162	-0.347449	0.334854	0.64434	0.958827	1.1693	1.35851	1.50337	1.70531	1.91714	2.13432	2.34239	2.49115	2.62319	2.74527	2.88547	2.99194	3.11872	3.22641	3.33058	3.3691	3.3902	3.43104	3.4628	3.48499	3.52454	3.61214	3.69231	3.69231	3.69231	3.69231	3.69231	3.69231	3.69231	3.69231	3.69231	3.69231	3.69231	3.69231	3.69231	3.69231
445	-0.742114	-0.276548	0.113595	0.513992	0.856972	1.04628	1.27137	1.49048	1.65549	1.9323	2.09819	2.26488	2.42406	2.6063	2.70114	2.82504	2.94421	3.23216	3.56954	3.6804	3.76996	3.86074	3.96713	4.05316	4.15778	4.20977	4.34547	4.40455	4.40959	4.40959	4.40959	4.40959	4.40959	4.40959	4.40959	4.40959	4.40959	4.40959	4.40959	4.40959	4.40959
446	-0.423059	1.05088	1.32313	1.58769	1.76949	1.93887	2.06888	2.19803	2.2805	2.3707	2.42574	2.48326	2.61564	2.66397	2.73571	2.90788	2.95528	3.00222	3.0946	3.22393	3.25144	3.39763	3.50347	3.53467	3.56179	3.58904	3.67259	3.72793	3.84023	3.88482	3.89307	3.9036	3.9127	3.9127	3.9127	3.9127	3.9127	3.9127	3.9127	3.9127	3.9127
447	-0.360856	0.243348	0.457915	0.699895	0.982784	1.10345	1.2522	1.37237	1.45515	1.55649	1.65527	1.76329	1.86055	1.945	2.05483	2.1442	2.27521	2.43589	2.49477	2.77117	2.89958	3.00294	3.07155	3.12075	3.2573	3.26537	3.2699	3.2699	3.2699	3.2699	3.2699	3.2699	3.2699	3.2699	3.2699	3.2699	3.2699	3.2699	3.2699	3.2699	3.2699
448	-0.298399	0.825497	1.05587	1.40433	1.58664	1.74611	1.90111	2.05464	2.1766	2.24909	2.39432	2.52345	2.66645	2.84534	2.9124	3.02328	3.18363	3.31845	3.3811	3.46386	3.61659	3.67129	3.8113	3.9087	3.93894	4.00184	4.00184	4.00184	4.00184	4.00184	4.00184	4.00184	4.00184	4.00184	4.00184	4.00184	4.00184	4.00184	4.00184	4.00184	4.00184
449	0.759236	1.00401	1.21872	1.39771	1.56713	1.74698	1.95053	2.16265	2.348	2.52835	2.66935	2.82346	2.92993	3.10204	3.19608	3.26614	3.31874	3.39447	3.39876	3.41358	3.53016	3.53016	3.53016	3.53016	3.53016	3.53016	3.53016	3.53016	3.53016	3.53016	3.53016	3.53016	3.53016	3.53016	3.53016	3.53016	3.53016	3.53016	3.53016	3.53016	3.53016
450	-0.344597	0.0288807	0.339137	0.61234	0.795936	0.937256	1.06394	1.35487	1.55395	1.69544	1.8054	1.9604	2.11578	2.23469	2.38152	2.54226	2.66591	2.78379	2.86784	2.92888	2.99035	3.23275	3.38073	3.50884	3.58499	3.61202	3.67543	3.73259	3.74142	3.77428	3.78605	3.78932	3.78932	3.78932	3.78932	3.78932	3.78932	3.78932	3.78932	3.78932	3.78932
451	-0.211114	0.415654	0.759845	1.08846	1.31131	1.49832	1.67781	1.89479	2.27339	2.41172	2.52431	2.6926	2.78178	2.95347	3.07542	3.14937	3.26076	3.31355	3.37597	3.43779	3.5192	3.55465	3.58183	3.6063	3.69591	3.72121	3.75096	3.75096	3.75096	3.75096	3.75096	3.75096	3.75096	3.75096	3.75096	3.75096	3.75096	3.75096	3.75096	3.75096	3.75096
452	0.863861	1.21813	1.46321	1.6927	1.89031	2.12037	2.45372	2.7062	2.96925	3.18883	3.31013	3.44577	3.62558	3.73528	3.83485	3.91279	3.93633	3.9947	4.0673	4.08283	4.15526	4.19271	4.19271	4.19271	4.19271	4.19271	4.19271	4.19271	4.19271	4.19271	4.19271	4.19271	4.19271	4.19271	4.19271	4.19271	4.19271	4.19271	4.19271	4.19271	4.19271
453	-0.336957	0.0683405	0.396564	0.677163	0.89631	1.07483	1.26106	1.47891	1.64643	1.82699	1.98879	2.13821	2.24011	2.3893	2.55083	2.6404	2.72789	2.85764	2.9382	3.09194	3.20373	3.27742	3.346	3.40355	3.43991	3.47886	3.54388	3.57244	3.6108	3.6235	3.68691	3.71233	3.79785	3.82344	3.83577	3.83577	3.83577	3.83577	3.83577	3.83577	3.83577
454	-1.15734	-0.389835	0.0717387	0.478623	0.780467	1.09197	1.31005	1.46385	1.65048	1.78611	1.91061	2.0356	2.15562	2.26553	2.36878	2.47426	2.59533	2.71583	2.81103	2.91734	3.02164	3.13438	3.22365	3.29171	3.35511	3.38595	3.41933	3.43492	3.48284	3.6402	3.65336	3.69315	3.69315	3.69315	3.69315	3.69315	3.69315	3.69315	3.69315	3.69315	3.69315
455	-1.27638	0.700819	0.943406	1.12002	1.3523	1.50804	1.68631	1.82464	2.01468	2.14145	2.28046	2.4262	2.58924	2.83584	2.96658	3.08724	3.20172	3.29401	3.3601	3.56074	3.64503	3.68807	3.70608	3.71821	3.75374	3.75374	3.75374	3.75374	3.75374	3.75374	3.75374	3.75374	3.75374	3.75374	3.75374	3.75374	3.75374	3.75374	3.75374	3.75374	3.75374
456	0.540295	0.99235	1.33941	1.58208	1.80837	2.03871	2.23879	2.4128	2.55666	2.66787	2.76982	2.82747	2.89517	3.14107	3.20109	3.35327	3.40498	3.43884	3.46182	3.57334	3.6114	3.6977	3.81424	4.05844	4.05844	4.05844	4.05844	4.05844	4.05844	4.05844	4.05844	4.05844	4.05844	4.05844	4.05844	4.05844	4.05844	4.05844	4.05844	4.05844	4.05844
457	-1.40572	0.43181	0.790439	1.07739	1.30722	1.45921	1.60956	1.78653	1.95125	2.08553	2.28997	2.47809	2.6267	2.74537	2.84117	3.00975	3.09512	3.16254	3.23527	3.27315	3.32835	3.36861	3.45725	3.50078	3.57597	3.62292	3.6504	3.6504	3.6504	3.6504	3.6504	3.6504	3.6504	3.6504	3.6504	3.6504	3.6504	3.6504	3.6504	3.6504	3.6504
458	-1.43786	0.401915	0.649278	0.83401	1.14194	1.56016	1.70203	1.8228	1.98548	2.12212	2.21903	2.42526	2.60877	2.77495	2.85091	2.89907	3.03567	3.16797	3.21594	3.27063	3.3191	3.34848	3.34884	3.34884	3.34884	3.34884	3.34884	3.34884	3.34884	3.34884	3.34884	3.34884	3.34884	3.34884	3.34884	3.34884	3.34884	3.34884	3.34884	3.34884	3.34884
459	0.278736	0.73295	1.0057	1.30006	1.53401	1.74422	2.10289	2.38294	2.50417	2.61628	2.70625	2.84042	2.98409	3.12806	3.27223	3.36901	3.5483	3.63602	3.69961	3.73174	3.7855	3.86447	3.89126	3.90693	4.01697	4.02654	4.0396	4.0396	4.0396	4.0396	4.0396	4.0396	4.0396	4.0396	4.0396	4.0396	4.0396	4.0396	4.0396	4.0396	4.0396
460	-1.50531	-0.471116	0.550706	0.89301	1.26421	1.68961	2.00056	2.29525	2.51451	2.647	2.75477	2.84229	2.92871	2.99816	3.03805	3.11491	3.17237	3.20855	3.26313	3.41195	3.51115	3.58801	3.63461	3.63461	3.63461	3.63461	3.63461	3.63461	3.63461	3.63461	3.63461	3.63461	3.63461	3.63461	3.63461	3.63461	3.63461	3.63461	3.63461	3.63461	3.63461
461	-1.4199	-0.461101	-0.0508906	0.298532	0.58644	0.797862	0.935444	1.17127	1.401	1.62606	1.8228	1.91953	2.00878	2.21073	2.38618	2.49242	2.63604	2.72404	2.80324	2.86898	2.90762	2.99246	3.08792	3.17947	3.29051	3.41648	3.45797	3.51843	3.55419	3.67498	3.68812	3.68859	3.68859	3.68859	3.68859	3.68859	3.68859	3.68859	3.68859	3.68859	3.68859
462	-0.0334327	0.229498	0.457139	0.677653	0.884763	1.07525	1.2305	1.31522	1.39219	1.5115	1.68443	1.75266	1.85404	1.99543	2.0655	2.13251	2.31585	2.51262	2.58216	2.64549	2.70463	2.72829	2.78309	2.79546	2.8048	2.86906	2.98587	3.04296	3.07611	3.0871	3.10969	3.10969	3.10969	3.10969	3.10969	3.10969	3.10969	3.10969	3.10969	3.10969	3.10969
463	0.486318	0.902501	1.12695	1.26869	1.40928	1.58111	1.74981	1.85741	2.01408	2.15293	2.4851	2.66771	2.79223	2.89948	3.0815	3.18039	3.2646	3.34361	3.63045	3.72526	3.79771	3.86544	3.93344	3.97959	3.99992	4.04087	4.07949	4.14662	4.15297	4.17188	4.19733	4.19733	4.19733	4.19733	4.19733	4.19733	4.19733	4.19733	4.19733	4.19733	4.19733
464	0.450177	0.742117	1.01837	1.2175	1.40886	1.57037	1.71931	1.88215	2.13237	2.30044	2.45664	2.57224	2.67108	2.76485	2.84396	2.96359	3.11557	3.22628	3.28753	3.33373	3.37439	3.42979	3.46902	3.54635	3.61483	3.6529	3.76643	3.79287	3.79287	3.79287	3.79287	3.79287	3.79287	3.79287	3.79287	3.79287	3.79287	3.79287	3.79287	3.79287	3.79287
465	-1.45707	0.0772119	0.818447	1.05879	1.23131	1.4006	1.54776	1.66771	1.77923	1.90349	2.00387	2.09676	2.18106	2.27892	2.4875	2.62406	2.70258	2.86409	2.93486	3.04413	3.14351	3.2141	3.2802	3.3565	3.47	3.56007	3.6094	3.66073	3.68786	3.7557	3.78328	3.8074	3.8074	3.8074	3.8074	3.8074	3.8074	3.8074	3.8074	3.8074	3.8074
466	-1.65341	-1.4811	-1.32699	-1.23585	-1.19203	-1.13804	-1.09168	-0.920213	-0.186491	0.42504	0.72739	0.99481	1.21787	1.50401	1.67212	1.83415	1.96802	2.08335	2.25388	2.37074	2.46565	2.79931	2.86404	2.96258	3.18502	3.36423	3.62705	3.66775	3.83986	3.87966	3.92679	3.9957	3.99868	3.99868	3.99868	3.99868	3.99868	3.99868	3.99868	3.99868	3.99868
467	0.0224414	0.508327	0.851832	1.03107	1.25626	1.46938	1.65918	1.82983	2.14307	2.32308	2.5522	2.69617	2.80465	2.96112	3.09804	3.26861	3.30753	3.34181	3.43331	3.46192	3.48418	3.52275	3.60002	3.71557	3.75005	3.78063	3.78063	3.78063	3.78063	3.78063	3.78063	3.78063	3.78063	3.78063	3.78063	3.78063	3.78063	3.78063	3.78063	3.78063	3.78063
468	-1.10799	-0.733932	-0.50047	-0.274684	-0.0959749	0.0590739	0.322595	0.720691	0.987581	1.22529	1.49206	1.82523	2.08275	2.28641	2.43481	2.55078	2.66715	2.82584	2.96589	3.09451	3.16937	3.26337	3.38186	3.47911	3.59596	3.67124	3.73447	3.77736	3.86517	3.93934	3.94279	4.07848	4.09993	4.15401	4.26207	4.28768	4.28768	4.28768	4.28768	4.28768	4.28768
469	0.776439	1.13061	1.41214	1.63629	1.84586	2.0865	2.25854	2.40984	2.56378	2.74256	2.90807	3.0436	3.13398	3.22004	3.30235	3.38192	3.53732	3.60828	3.67712	3.68634	3.69318	3.69318	3.69318	3.69318	3.69318	3.69318	3.69318	3.69318	3.69318	3.69318	3.69318	3.69318	3.69318	3.69318	3.69318	3.69318	3.69318	3.69318	3.69318	3.69318	3.69318
470	-0.796932	-0.283983	0.583387	0.906838	1.19468	1.43228	1.57707	1.71056	1.85171	1.99474	2.06138	2.22977	2.28707	2.37756	2.47234	2.68891	2.77829	2.85908	2.98176	3.04499	3.24361	3.35931	3.54602	3.68203	3.74227	3.94467	3.94627	3.94627	3.94627	3.94627	3.94627	3.94627	3.94627	3.94627	3.94627	3.94627	3.94627	3.94627	3.94627	3.94627	3.94627
471	-1.34804	-0.794838	0.0721394	0.430784	0.61568	0.802665	1.02912	1.2154	1.37943	1.54506	1.67291	1.81764	2.05144	2.27004	2.39019	2.5216	2.65795	2.79666	2.90021	2.99893	3.09451	3.15273	3.21737	3.3164	3.34792	3.42168	3.44338	3.49824	3.51415	3.54194	3.58814	3.63214	3.65265	3.65736	3.65736	3.65736	3.65736	3.65736	3.65736	3.65736	3.65736
472	-0.38463	0.423479	0.629912	0.904017	1.12173	1.27758	1.47123	1.70633	1.87815	2.00016	2.11662	2.22761	2.46967	2.55512	2.61661	2.68558	2.8424	2.89975	2.95253	3.01421	3.10098	3.25586	3.32436	3.36274	3.41139	3.50682	3.59119	3.6086	3.6691	3.75853	3.78918	3.79692	3.82095	3.95432	3.95432	3.95432	3.95432	3.95432	3.95432	3.95432	3.95432
473	-0.978003	0.389059	0.824863	1.08949	1.56051	1.7832	1.96376	2.20764	2.40592	2.55651	2.77743	2.90859	3.04205	3.30528	3.41805	3.53186	3.61374	3.73833	3.81831	3.88066	3.90491	3.92516	3.94225	3.99186	3.99186	3.99186	3.99186	3.99186	3.99186	3.99186	3.99186	3.99186	3.99186	3.99186	3.99186	3.99186	3.99186	3.99186	3.99186	3.99186	3.99186
474	-0.286353	0.487237	0.717659	0.93959	1.15693	1.34518	1.57104	1.71973	1.85552	1.97555	2.09037	2.18493	2.29731	2.38083	2.49765	2.58152	2.78795	3.11016	3.4026	3.54986	3.67675	3.77967	3.8336	3.86011	3.8757	3.89341	3.89341	3.89341	3.89341	3.89341	3.89341	3.89341	3.89341	3.89341	3.89341	3.89341	3.89341	3.89341	3.89341	3.89341	3.89341
475	-1.01304	-0.342319	0.265795	0.613669	0.886748	1.13599	1.3335	1.5098	1.63355	1.82825	1.98753	2.11041	2.21067	2.30123	2.40977	2.51598	2.57787	2.71868	2.80067	2.88926	2.93396	2.95987	3.04533	3.06805	3.1898	3.27388	3.31404	3.35851	3.46862	3.56114	3.71852	3.81337	3.86933	3.9077	4.0543	4.0543	4.0543	4.0543	4.0543	4.0543	4.0543
476	0.37597	0.781975	1.03174	1.23071	1.39754	1.5916	1.76827	1.92504	2.0773	2.24232	2.41671	2.56618	2.66925	2.78865	2.91125	3.07352	3.13994	3.35345	3.43439	3.45561	3.46705	3.47772	3.47772	3.47772	3.47772	3.47772	3.47772	3.47772	3.47772	3.47772	3.47772	3.47772	3.47772	3.47772	3.47772	3.47772	3.47772	3.47772	3.47772	3.47772	3.47772
477	-1.11224	-0.052138	0.462654	0.785082	1.0504	1.30695	1.53507	1.78577	2.00965	2.22494	2.4114	2.55452	2.73284	2.86528	3.04798	3.19337	3.32388	3.41717	3.47994	3.58219	3.63884	3.733	3.8654	3.97474	4.08387	4.08648	4.08648	4.08648	4.08648	4.08648	4.08648	4.08648	4.08648	4.08648	4.08648	4.08648	4.08648	4.08648	4.08648	4.08648	4.08648
478	0.00164306	0.376694	0.679666	0.927479	1.17138	1.39535	1.60432	1.8013	1.99759	2.16831	2.30699	2.42185	2.60403	2.70203	2.84631	2.9942	3.06709	3.1574	3.29407	3.47903	3.57136	3.61892	3.65104	3.66785	3.69988	3.72506	3.78278	3.79586	3.82339	3.82339	3.82339	3.82339	3.82339	3.82339	3.82339	3.82339	3.82339	3.82339	3.82339	3.82339	3.82339
479	-0.393018	0.295556	0.645524	0.87909	1.05272	1.19429	1.32325	1.49445	1.69631	1.90371	2.08006	2.19487	2.39295	2.66863	2.78698	2.86571	3.09543	3.25164	3.37573	3.48458	3.5485	3.61712	3.7062	3.76193	3.80675	3.8424	3.86055	3.86055	3.86055	3.86055	3.86055	3.86055	3.86055	3.86055	3.86055	3.86055	3.86055	3.86055	3.86055	3.86055	3.86055
480	-1.58403	1.21956	1.55783	1.87608	2.10301	2.30251	2.48198	2.6165	2.83356	2.96119	3.0898	3.17698	3.28406	3.3637	3.45436	3.50973	3.54601	3.56705	3.57789	3.57789	3.57789	3.57789	3.57789	3.57789	3.57789	3.57789	3.57789	3.57789	3.57789	3.57789	3.57789	3.57789	3.57789	3.57789	3.57789	3.57789	3.57789	3.57789	3.57789	3.57789	3.57789
481	-1.23031	0.531467	0.804894	1.06716	1.28964	1.55858	1.71795	1.99788	2.18187	2.34021	2.49993	2.65059	2.77109	2.87809	2.9694	3.11043	3.34439	3.37347	3.4335	3.4509	3.48899	3.5185	3.5247	3.62753	3.69216	3.72019	3.81194	3.81194	3.81194	3.81194	3.81194	3.81194	3.81194	3.81194	3.81194	3.81194	3.81194	3.81194	3.81194	3.81194	3.81194
482	0.642299	1.00381	1.22585	1.45575	1.68326	1.86471	2.01775	2.17105	2.32653	2.47408	2.60584	2.80121	2.90175	3.00004	3.13325	3.26034	3.33333	3.39438	3.45753	3.54712	3.62548	3.68626	3.74319	3.74644	3.77065	3.77065	3.77065	3.77065	3.77065	3.77065	3.77065	3.77065	3.77065	3.77065	3.77065	3.77065	3.77065	3.77065	3.77065	3.77065	3.77065
483	-1.23129	0.172671	0.5143	0.704094	0.891586	1.15265	1.35844	1.5328	1.67846	1.80534	1.91518	2.05644	2.22151	2.3782	2.61842	2.78224	3.00611	3.13027	3.41024	3.5165	3.60128	3.72046	3.78531	3.84736	3.86013	3.86013	3.86013	3.86013	3.86013	3.86013	3.86013	3.86013	3.86013	3.86013	3.86013	3.86013	3.86013	3.86013	3.86013	3.86013	3.86013
484	0.59037	0.840076	1.07099	1.29748	1.41616	1.60396	1.75358	1.93137	2.06057	2.28329	2.38788	2.46617	2.65182	2.71313	2.84025	2.90179	2.98076	3.08033	3.14084	3.22229	3.30359	3.32941	3.36009	3.43477	3.45445	3.5129	3.52952	3.57302	3.64107	3.64392	3.66097	3.76488	3.81299	3.8573	3.85809	3.85809	3.85809	3.85809	3.85809	3.85809	3.85809
485	0.599653	0.830223	1.12139	1.33213	1.50535	1.67485	1.8133	1.87335	1.99993	2.07896	2.11553	2.14367	2.16763	2.21301	2.25752	2.28663	2.315	2.34103	2.39482	2.48955	2.61903	2.65829	2.69481	2.75352	2.88081	3.05338	3.17889	3.19497	3.34855	3.5323	3.54706	3.54706	3.54706	3.54706	3.54706	3.54706	3.54706	3.54706	3.54706	3.54706	3.54706
486	-0.955204	0.447456	0.881947	1.1494	1.354	1.57995	1.80185	1.96248	2.13546	2.30679	2.4065	2.49117	2.60144	2.679	2.75094	2.8143	2.91095	2.9806	3.09426	3.18865	3.2384	3.34224	3.43836	3.54313	3.6593	3.7453	3.82795	3.84282	3.84282	3.84282	3.84282	3.84282	3.84282	3.84282	3.84282	3.84282	3.84282	3.84282	3.84282	3.84282	3.84282
487	-1.29101	0.183232	0.442003	0.685211	0.894502	1.1493	1.34691	1.54711	1.77626	1.93747	2.07968	2.21138	2.34193	2.48319	2.60383	2.70881	2.80853	3.06819	3.13456	3.19612	3.25054	3.3002	3.34906	3.3742	3.39036	3.4314	3.58467	3.62427	3.74758	3.82348	3.84024	3.84728	3.85233	3.85233	3.85233	3.85233	3.85233	3.85233	3.85233	3.85233	3.85233
488	-1.28229	0.474087	1.15171	1.53898	1.78397	2.00591	2.22258	2.34841	2.48652	2.69818	2.82218	2.93423	3.04772	3.12928	3.22173	3.36701	3.49674	3.61506	3.66832	3.71753	3.753	3.77832	3.82185	3.82747	3.85841	4.01592	4.01592	4.01592	4.01592	4.01592	4.01592	4.01592	4.01592	4.01592	4.01592	4.01592	4.01592	4.01592	4.01592	4.01592	4.01592
489	-1.31811	0.771031	1.08476	1.39343	1.70077	1.91622	2.10142	2.28795	2.43273	2.56161	2.71128	2.82576	2.98412	3.08581	3.24573	3.3437	3.43961	3.5074	3.57402	3.67983	3.73538	3.8244	3.85565	3.92155	3.97914	3.97914	3.97914	3.97914	3.97914	3.97914	3.97914	3.97914	3.97914	3.97914	3.97914	3.97914	3.97914	3.97914	3.97914	3.97914	3.97914
490	-1.41265	-0.71775	-0.104542	0.359064	0.599403	0.803901	1.02346	1.23487	1.42097	1.57941	1.72943	1.9094	1.99421	2.11395	2.20629	2.36741	2.51694	2.62078	2.72323	2.84744	2.9419	3.02594	3.28247	3.40233	3.49445	3.52921	3.57318	3.6163	3.66012	3.68881	3.76629	3.81229	3.8476	3.87429	3.91315	3.94758	3.97134	4.04994	4.08055	4.24046	4.25411
491	-0.0838288	0.466932	0.793683	0.97835	1.15337	1.29142	1.42847	1.6831	1.92441	2.03508	2.20115	2.29806	2.37177	2.46701	2.53291	2.59747	2.76506	2.90398	2.98611	3.10719	3.16665	3.21746	3.35556	3.40272	3.42785	3.48038	3.50274	3.61872	3.64298	3.75235	3.86632	3.87848	3.93302	3.93875	3.969	3.98631	4.00261	4.0268	4.0268	4.0268	4.0268
492	-0.671704	-0.230456	0.066135	0.369148	0.64486	0.889369	1.11888	1.70918	1.93007	2.14329	2.31022	2.46457	2.58718	2.70097	2.844	2.96588	3.0707	3.1556	3.28984	3.31936	3.31936	3.31936	3.31936	3.31936	3.31936	3.31936	3.31936	3.31936	3.31936	3.31936	3.31936	3.31936	3.31936	3.31936	3.31936	3.31936	3.31936	3.31936	3.31936	3.31936	3.31936
493	-1.36068	-1.19301	-0.312039	0.20776	0.656249	0.912278	1.16697	1.38489	1.66792	1.80903	1.99788	2.21006	2.33445	2.50277	2.66027	2.79385	2.92087	3.03721	3.15416	3.26296	3.41951	3.57684	3.66201	3.72177	3.7755	3.81794	3.81794	3.81794	3.81794	3.81794	3.81794	3.81794	3.81794	3.81794	3.81794	3.81794	3.81794	3.81794	3.81794	3.81794	3.81794
494	0.653637	0.982997	1.28742	1.49772	1.7257	1.88354	2.05833	2.20404	2.35827	2.54517	2.67575	2.815	2.95164	3.13919	3.25918	3.37956	3.48666	3.56013	3.62824	3.69166	3.79254	3.87003	3.88826	3.95152	3.99096	4.0455	4.14381	4.14933	4.27962	4.29332	4.29332	4.29332	4.29332	4.29332	4.29332	4.29332	4.29332	4.29332	4.29332	4.29332	4.29332
495	-1.37737	-0.225415	0.864716	1.14548	1.36871	1.58095	1.82056	1.98398	2.13524	2.34244	2.53205	2.74908	2.94967	3.05732	3.12789	3.20874	3.28933	3.3421	3.42072	3.6093	3.72733	3.78696	3.82741	3.86696	3.88348	3.88348	3.88348	3.88348	3.88348	3.88348	3.88348	3.88348	3.88348	3.88348	3.88348	3.88348	3.88348	3.88348	3.88348	3.88348	3.88348
496	-1.40984	1.10146	1.38847	1.60528	1.75971	1.92077	2.04955	2.19441	2.36133	2.49602	2.62826	2.75946	2.85369	2.98368	3.07423	3.3319	3.42762	3.49501	3.5406	3.63772	3.74088	3.82929	3.89637	3.92022	3.92022	3.92022	3.92022	3.92022	3.92022	3.92022	3.92022	3.92022	3.92022	3.92022	3.92022	3.92022	3.92022	3.92022	3.92022	3.92022	3.92022
497	-1.13394	-0.127135	0.315169	0.598956	0.848164	1.04346	1.29887	1.52231	1.80173	1.97466	2.13879	2.34491	2.5091	2.70409	2.81294	2.89788	2.98015	3.06	3.12036	3.22459	3.32336	3.37674	3.44368	3.48845	3.51047	3.56159	3.56323	3.56323	3.56323	3.56323	3.56323	3.56323	3.56323	3.56323	3.56323	3.56323	3.56323	3.56323	3.56323	3.56323	3.56323
498	0.0938286	0.385134	0.662378	0.873538	1.08091	1.24831	1.47728	1.66563	1.83344	1.96119	2.08854	2.27419	2.426	2.62275	2.74137	2.87837	3.02625	3.13901	3.24298	3.30289	3.38632	3.43368	3.46983	3.54158	3.56801	3.70367	3.84606	3.92813	3.92813	3.92813	3.92813	3.92813	3.92813	3.92813	3.92813	3.92813	3.92813	3.92813	3.92813	3.92813	3.92813
499	-0.633174	-0.0431431	0.378452	0.734475	0.927647	1.10873	1.25883	1.42323	1.62259	1.74003	1.9539	2.06351	2.22229	2.42535	2.59037	2.74075	2.83394	2.92685	3.06068	3.15255	3.21567	3.35484	3.48552	3.54061	3.59411	3.66476	3.69765	3.74801	3.75319	3.7553	3.7553	3.7553	3.7553	3.7553	3.7553	3.7553	3.7553	3.7553	3.7553	3.7553	3.7553
500	-1.49907	0.843654	1.15655	1.42141	1.69108	1.93135	2.10955	2.26134	2.39899	2.56004	2.70148	2.80351	2.889	2.9791	3.11492	3.22409	3.28657	3.36908	3.45106	3.54763	3.58504	3.61415	3.63967	3.70371	3.76657	3.80793	3.83758	3.84435	3.89489	3.89689	4.04992	4.07091	4.07496	4.07496	4.07496	4.07496	4.07496	4.07496	4.07496	4.07496	4.07496
501	-1.48113	-1.02695	-0.652461	-0.279322	0.133825	0.363375	0.572207	0.757358	0.976665	1.17489	1.40275	1.5665	1.72899	1.85203	1.96029	2.06614	2.15602	2.25125	2.35662	2.47007	2.55786	2.69753	2.92695	3.04609	3.12595	3.20776	3.379	3.46037	3.51237	3.63282	3.66731	3.82319	3.8352	3.88142	3.90389	3.91482	3.91482	3.91482	3.91482	3.91482	3.91482
502	0.739165	0.970358	1.17954	1.36337	1.53874	1.71213	1.84701	1.96309	2.0629	2.26013	2.37952	2.59505	2.70521	2.77832	2.82214	2.87796	3.04681	3.11461	3.24407	3.29214	3.29214	3.29214	3.29214	3.29214	3.29214	3.29214	3.29214	3.29214	3.29214	3.29214	3.29214	3.29214	3.29214	3.29214	3.29214	3.29214	3.29214	3.29214	3.29214	3.29214	3.29214
503	-1.35742	-1.18728	-0.76142	-0.375194	0.0215965	0.310361	0.584244	0.914458	1.19163	1.33757	1.54229	1.65125	1.7532	1.85728	1.95018	2.05928	2.14917	2.21413	2.40367	2.45358	2.47585	2.57781	2.57781	2.57781	2.57781	2.57781	2.57781	2.57781	2.57781	2.57781	2.57781	2.57781	2.57781	2.57781	2.57781	2.57781	2.57781	2.57781	2.57781	2.57781	2.57781
504	-1.49032	-1.07832	-0.00383586	0.504471	0.758388	0.934368	1.15787	1.32065	1.51028	1.69756	1.83038	1.98384	2.09839	2.24188	2.45359	2.64132	2.94126	3.2828	3.44587	3.7028	3.89353	4.01086	4.11499	4.11499	4.11499	4.11499	4.11499	4.11499	4.11499	4.11499	4.11499	4.11499	4.11499	4.11499	4.11499	4.11499	4.11499	4.11499	4.11499	4.11499	4.11499
505	-1.21818	-0.57873	-0.076385	0.407475	0.737731	0.961088	1.19829	1.42234	1.61805	1.78443	1.95516	2.11701	2.25717	2.40587	2.5902	2.68987	2.89277	3.08601	3.21186	3.3247	3.40276	3.49234	3.56285	3.59478	3.64825	3.68434	3.72375	3.73622	3.84421	3.89307	3.90785	3.90785	3.90785	3.90785	3.90785	3.90785	3.90785	3.90785	3.90785	3.90785	3.90785
506	-0.0669883	0.302666	0.534264	0.78554	0.989504	1.1416	1.28018	1.40034	1.53212	1.88976	1.98277	2.07392	2.14744	2.23859	2.36939	2.4504	2.61537	2.7319	2.79905	2.9369	3.0581	3.09912	3.16934	3.27697	3.32677	3.34449	3.36187	3.37116	3.40783	3.60807	3.63287	3.64442	3.65913	3.65913	3.65913	3.65913	3.65913	3.65913	3.65913	3.65913	3.65913
507	-0.111766	0.354096	0.728391	1.04461	1.28825	1.5173	1.72035	1.8676	2.0083	2.13631	2.24098	2.3414	2.43907	2.51646	2.63918	2.77243	2.82964	2.99097	3.17711	3.25357	3.30268	3.37505	3.46759	3.53207	3.56808	3.61081	3.66893	3.67824	3.67824	3.67824	3.67824	3.67824	3.67824	3.67824	3.67824	3.67824	3.67824	3.67824	3.67824	3.67824	3.67824
508	-1.05398	-0.580901	0.184612	0.396941	0.625521	0.852277	1.04588	1.22916	1.46534	1.6429	1.85042	2.01014	2.25898	2.39774	2.53826	2.69759	2.84269	2.96733	3.11998	3.2227	3.3155	3.42521	3.56674	3.68202	3.72992	3.77493	3.81474	3.87505	3.907	3.9444	3.96435	3.96435	3.96435	3.96435	3.96435	3.96435	3.96435	3.96435	3.96435	3.96435	3.96435
509	-1.21981	-0.128098	0.703309	1.16821	1.50829	1.78182	2.00278	2.19199	2.30129	2.52597	2.63384	2.79212	3.01447	3.10508	3.18934	3.26056	3.36931	3.3905	3.42563	3.42563	3.42563	3.42563	3.42563	3.42563	3.42563	3.42563	3.42563	3.42563	3.42563	3.42563	3.42563	3.42563	3.42563	3.42563	3.42563	3.42563	3.42563	3.42563	3.42563	3.42563	3.42563
510	-1.37619	-0.759391	0.208873	0.582519	0.895456	1.22779	1.46243	1.73871	1.87434	1.99064	2.11484	2.3548	2.52623	2.70627	2.89637	3.05356	3.17549	3.27798	3.34273	3.41381	3.54787	3.66288	3.74024	3.80684	3.85835	3.929	3.98042	4.1019	4.11443	4.12458	4.16505	4.18399	4.18399	4.18399	4.18399	4.18399	4.18399	4.18399	4.18399	4.18399	4.18399
511	-0.893648	-0.208511	0.32264	0.679579	0.928309	1.17495	1.40137	1.63272	1.7336	1.89097	2.06181	2.21287	2.31596	2.40015	2.60722	2.67383	2.84883	2.90544	2.97858	3.10059	3.14803	3.25251	3.34312	3.38589	3.41762	3.46823	3.4838	3.59478	3.62351	3.64593	3.81583	3.86645	3.87792	3.87792	3.87792	3.87792	3.87792	3.87792	3.87792	3.87792	3.87792
512	-1.54257	-0.351887	0.401468	0.667955	0.904993	1.21301	1.52901	1.817	2.06585	2.2798	2.50566	2.7291	2.81607	2.92633	3.13571	3.25337	3.33649	3.40058	3.44194	3.57545	3.60961	3.66858	3.75479	3.75479	3.75479	3.75479	3.75479	3.75479	3.75479	3.75479	3.75479	3.75479	3.75479	3.75479	3.75479	3.75479	3.75479	3.75479	3.75479	3.75479	3.75479
513	-1.27299	-0.0943524	0.226406	0.488405	0.714055	0.993863	1.18131	1.33098	1.44545	1.54695	1.67001	1.79964	2.05266	2.18931	2.34321	2.47859	2.60629	2.80568	2.95637	3.10691	3.22682	3.37267	3.4562	3.53591	3.66606	3.81085	3.86173	3.91086	4.05749	4.15779	4.18028	4.20197	4.20197	4.20197	4.20197	4.20197	4.20197	4.20197	4.20197	4.20197	4.20197
514	0.070802	0.417647	0.752887	0.990082	1.25607	1.46713	1.67003	1.84173	2.03965	2.197	2.37856	2.59371	2.80432	2.97568	3.11257	3.20019	3.32227	3.40614	3.46726	3.51625	3.54137	3.62236	3.89341	3.90669	3.90669	3.90669	3.90669	3.90669	3.90669	3.90669	3.90669	3.90669	3.90669	3.90669	3.90669	3.90669	3.90669	3.90669	3.90669	3.90669	3.90669
515	0.700915	1.05129	1.30262	1.54859	1.78458	2.08519	2.29087	2.53712	2.63877	2.75528	2.87965	2.94932	3.02762	3.06903	3.15156	3.27332	3.29869	3.36245	3.44394	3.50325	3.54805	3.59467	3.70199	3.73376	3.73376	3.73376	3.73376	3.73376	3.73376	3.73376	3.73376	3.73376	3.73376	3.73376	3.73376	3.73376	3.73376	3.73376	3.73376	3.73376	3.73376
516	0.317472	0.754743	1.02624	1.26517	1.50784	1.7179	2.02031	2.1857	2.31033	2.47704	2.59414	2.67573	2.86079	3.04471	3.13924	3.20596	3.20596	3.20596	3.20596	3.20596	3.20596	3.20596	3.20596	3.20596	3.20596	3.20596	3.20596	3.20596	3.20596	3.20596	3.20596	3.20596	3.20596	3.20596	3.20596	3.20596	3.20596	3.20596	3.20596	3.20596	3.20596
517	1.02359	1.26277	1.44727	1.70162	1.91116	2.18002	2.40837	2.57858	2.70687	2.80597	2.99508	3.07541	3.15349	3.31148	3.39569	3.4806	3.58781	3.68065	3.76876	3.81781	3.8505	3.89584	3.9209	4.06129	4.07438	4.13467	4.17747	4.19415	4.19415	4.19415	4.19415	4.19415	4.19415	4.19415	4.19415	4.19415	4.19415	4.19415	4.19415	4.19415	4.19415
518	0.3265	0.67778	0.946768	1.19535	1.42859	1.64091	1.8112	1.95868	2.09498	2.21054	2.34656	2.4453	2.51886	2.63652	2.69251	2.80772	2.89346	2.96846	3.04759	3.15996	3.21994	3.30081	3.31928	3.41019	3.42502	3.61068	3.61617	3.70829	3.83556	3.87589	3.91243	3.98634	4.01799	4.19397	4.25165	4.32949	4.38374	4.41924	4.41924	4.41924	4.41924
519	-1.25459	-0.920213	0.571905	1.13591	1.3977	1.59465	1.89299	2.08366	2.48503	2.66414	2.81967	2.95892	3.08908	3.29841	3.48746	3.54129	3.5946	3.64185	3.70339	3.72748	3.90503	3.92488	4.05652	4.08038	4.09289	4.10139	4.10139	4.10139	4.10139	4.10139	4.10139	4.10139	4.10139	4.10139	4.10139	4.10139	4.10139	4.10139	4.10139	4.10139	4.10139
520	-1.26641	-0.159122	0.336297	0.591742	0.805972	1.10438	1.30473	1.44989	1.54451	1.68191	1.77676	1.89691	1.98729	2.07007	2.16578	2.3696	2.52045	2.61094	2.69237	2.86905	2.94715	3.02076	3.07283	3.11775	3.17766	3.31563	3.39512	3.4467	3.48813	3.50346	3.51439	3.52768	3.56139	3.64021	3.66208	3.66208	3.66208	3.66208	3.66208	3.66208	3.66208
521	0.750632	0.980742	1.1858	1.3519	1.5285	1.67137	1.79117	1.96942	2.08151	2.26581	2.38911	2.65549	2.79913	2.94706	3.06472	3.2035	3.30304	3.37317	3.46493	3.51083	3.53705	3.68033	3.89807	3.9165	3.9165	3.9165	3.9165	3.9165	3.9165	3.9165	3.9165	3.9165	3.9165	3.9165	3.9165	3.9165	3.9165	3.9165	3.9165	3.9165	3.9165
522	0.63016	0.896334	1.10763	1.28476	1.44272	1.58631	1.71106	1.95071	2.09836	2.24699	2.38719	2.48581	2.64596	2.76984	2.8799	2.96517	3.14107	3.23835	3.32454	3.42768	3.49918	3.56608	3.61201	3.68593	3.73129	3.76538	3.86419	3.86995	3.93098	3.93098	3.93098	3.93098	3.93098	3.93098	3.93098	3.93098	3.93098	3.93098	3.93098	3.93098	3.93098
523	-1.26952	-1.08814	0.272567	0.777612	0.99416	1.20348	1.40563	1.59262	1.76709	2.01139	2.15683	2.32722	2.4583	2.58418	2.69802	2.78055	2.87693	2.97013	3.17075	3.30324	3.40224	3.50151	3.58371	3.68321	3.74264	3.84874	3.91632	3.93696	3.95405	3.95405	3.95405	3.95405	3.95405	3.95405	3.95405	3.95405	3.95405	3.95405	3.95405	3.95405	3.95405
524	-1.38982	-0.927992	-0.132046	0.359872	0.484442	0.594287	0.689893	0.840228	0.92423	0.984161	1.06362	1.13584	1.35154	1.60981	1.79512	1.94533	2.07686	2.19291	2.2822	2.36951	2.41833	2.47839	2.53686	2.58886	2.63048	2.65631	2.78294	2.88527	2.94165	3.12625	3.17453	3.19866	3.2256	3.25018	3.32025	3.33732	3.46351	3.58186	3.64375	3.70773	3.74664
525	-1.58045	-0.483583	0.316503	0.541218	0.773115	0.95638	1.15127	1.36002	1.58453	1.86864	1.98416	2.12996	2.29351	2.43587	2.56504	2.6916	2.79962	2.9268	3.01287	3.23553	3.38456	3.48377	3.80409	3.83491	3.8611	3.93298	3.96186	4.0213	4.0387	4.0387	4.0387	4.0387	4.0387	4.0387	4.0387	4.0387	4.0387	4.0387	4.0387	4.0387	4.0387
526	0.526012	0.908751	1.12878	1.31883	1.47775	1.62165	1.76193	1.94568	2.12386	2.26038	2.37232	2.47619	2.57685	2.67819	2.84914	2.98128	3.0548	3.12442	3.17966	3.37286	3.41252	3.4486	3.47773	3.5396	3.66291	3.78396	3.88309	3.91091	3.91091	3.91091	3.91091	3.91091	3.91091	3.91091	3.91091	3.91091	3.91091	3.91091	3.91091	3.91091	3.91091
527	0.925269	1.1812	1.44097	1.67098	1.86334	2.01599	2.15733	2.31843	2.45754	2.65934	2.7679	3.00237	3.11473	3.20542	3.43819	3.50198	3.54061	3.57011	3.64028	3.66481	3.68482	3.7155	3.80277	3.83888	4.06656	4.08753	4.11112	4.11112	4.11112	4.11112	4.11112	4.11112	4.11112	4.11112	4.11112	4.11112	4.11112	4.11112	4.11112	4.11112	4.11112
528	0.324259	0.620299	0.878739	1.10976	1.28366	1.45336	1.61587	1.76612	1.92733	2.09787	2.23388	2.34789	2.48437	2.65694	2.84913	2.96113	3.06164	3.15545	3.30458	3.42297	3.52397	3.63249	3.70136	3.80709	3.87301	3.93397	3.97898	4.05304	4.09277	4.11314	4.11314	4.11314	4.11314	4.11314	4.11314	4.11314	4.11314	4.11314	4.11314	4.11314	4.11314
529	-1.36724	0.443497	0.745424	0.961994	1.14101	1.37908	1.66621	1.85851	2.03873	2.24481	2.40035	2.5405	2.68599	2.81322	2.94039	3.0249	3.11344	3.16193	3.22493	3.27503	3.3168	3.44094	3.55342	3.57335	3.67645	3.70563	3.75697	3.86116	3.90274	3.93455	3.93455	3.93455	3.93455	3.93455	3.93455	3.93455	3.93455	3.93455	3.93455	3.93455	3.93455
530	0.289604	0.812719	1.21229	1.47662	1.63903	1.85633	2.09212	2.25269	2.35184	2.4606	2.54861	2.76339	2.88524	3.17203	3.26441	3.33817	3.39342	3.45494	3.57453	3.65731	3.79654	3.85262	3.91397	3.99102	4.01225	4.02794	4.09902	4.10689	4.14562	4.16544	4.16544	4.16544	4.16544	4.16544	4.16544	4.16544	4.16544	4.16544	4.16544	4.16544	4.16544
531	-1.28314	0.331198	0.699618	1.12952	1.4428	1.66839	1.87435	2.02786	2.17471	2.30675	2.52256	2.61455	2.67639	2.74118	2.82386	2.89219	2.95815	3.08813	3.20335	3.31052	3.42877	3.48592	3.58188	3.64146	3.68598	3.69917	3.70111	3.76912	3.82436	3.9004	3.9015	3.90932	3.90932	3.90932	3.90932	3.90932	3.90932	3.90932	3.90932	3.90932	3.90932
532	0.61037	0.993487	1.34147	1.6567	1.94758	2.07495	2.22489	2.3627	2.54554	2.70498	2.85525	3.01453	3.11921	3.1979	3.32055	3.44658	3.60815	3.67208	3.73546	3.77165	3.77165	3.77165	3.77165	3.77165	3.77165	3.77165	3.77165	3.77165	3.77165	3.77165	3.77165	3.77165	3.77165	3.77165	3.77165	3.77165	3.77165	3.77165	3.77165	3.77165	3.77165
533	-1.1564	-0.416671	0.28546	0.771684	1.05035	1.34182	1.53529	1.75993	1.98339	2.22089	2.39192	2.66323	2.82792	2.97155	3.14421	3.38728	3.5832	3.73419	3.80311	3.85483	3.87064	3.88636	3.91817	3.95427	3.95427	3.95427	3.95427	3.95427	3.95427	3.95427	3.95427	3.95427	3.95427	3.95427	3.95427	3.95427	3.95427	3.95427	3.95427	3.95427	3.95427
534	-0.236868	0.777941	1.24375	1.49068	1.65162	1.80083	1.99872	2.16082	2.3123	2.44496	2.60916	2.67685	2.85658	2.91989	3.02602	3.09539	3.25656	3.29786	3.37682	3.44294	3.49734	3.54062	3.57159	3.6225	3.64106	3.6418	3.73212	3.87818	3.90044	3.90044	3.90044	3.90044	3.90044	3.90044	3.90044	3.90044	3.90044	3.90044	3.90044	3.90044	3.90044
535	-1.14965	0.46024	0.656361	0.842343	1.00044	1.17356	1.35191	1.5748	1.71802	1.88136	2.04035	2.17671	2.32938	2.42162	2.50635	2.59737	2.7741	2.94236	3.00331	3.11366	3.19855	3.27293	3.29103	3.29957	3.35847	3.35847	3.35847	3.35847	3.35847	3.35847	3.35847	3.35847	3.35847	3.35847	3.35847	3.35847	3.35847	3.35847	3.35847	3.35847	3.35847
536	-1.35577	-0.631091	-0.182127	0.0977107	0.570849	0.952595	1.23533	1.51245	1.65146	1.80807	2.0752	2.22869	2.35803	2.46638	2.63967	2.69816	2.80079	2.85372	2.8948	2.9712	3.04318	3.0828	3.09062	3.11978	3.14438	3.14438	3.14438	3.14438	3.14438	3.14438	3.14438	3.14438	3.14438	3.14438	3.14438	3.14438	3.14438	3.14438	3.14438	3.14438	3.14438
537	0.580729	0.859825	1.10325	1.3289	1.64094	1.89921	2.08155	2.27062	2.47243	2.6349	2.82233	3.12421	3.33282	3.51606	3.62011	3.71074	3.7684	3.87974	3.97328	4.04088	4.09962	4.19098	4.2821	4.31851	4.45593	4.48207	4.48308	4.48308	4.48308	4.48308	4.48308	4.48308	4.48308	4.48308	4.48308	4.48308	4.48308	4.48308	4.48308	4.48308	4.48308
538	0.362183	0.631565	0.918478	1.16247	1.5282	1.7609	1.96432	2.13134	2.26033	2.39705	2.52289	2.71817	2.87535	3.16012	3.25568	3.43902	3.53125	3.61592	3.7689	3.8308	3.9275	4.03208	4.10187	4.12067	4.13689	4.14832	4.14832	4.14832	4.14832	4.14832	4.14832	4.14832	4.14832	4.14832	4.14832	4.14832	4.14832	4.14832	4.14832	4.14832	4.14832
539	-1.22098	-1.07658	-0.76773	0.407259	0.72176	1.02673	1.25565	1.40888	1.54291	1.73935	1.87257	2.00289	2.11999	2.23683	2.3521	2.62104	2.78522	2.92579	3.06489	3.14504	3.27159	3.30766	3.42611	3.52221	3.87156	3.90689	3.90689	3.90689	3.90689	3.90689	3.90689	3.90689	3.90689	3.90689	3.90689	3.90689	3.90689	3.90689	3.90689	3.90689	3.90689
540	-1.23048	-0.702281	0.110153	0.3122	0.508308	0.779275	0.983483	1.16285	1.34463	1.47989	1.63851	1.87738	2.0514	2.17264	2.29954	2.51802	2.6632	2.84315	3.0511	3.24365	3.40133	3.46526	3.54973	3.68097	3.76945	3.84254	3.97941	4.0492	4.06366	4.06366	4.06366	4.06366	4.06366	4.06366	4.06366	4.06366	4.06366	4.06366	4.06366	4.06366	4.06366
541	-0.577968	0.384197	0.550401	0.831182	1.2232	1.49569	1.68932	1.85449	2.0203	2.12848	2.36416	2.49338	2.58816	2.67797	2.75838	2.84558	2.93115	3.02134	3.24482	3.2985	3.31812	3.38987	3.46182	3.50309	3.58506	3.62825	3.66555	3.7254	3.89681	3.89681	3.89681	3.89681	3.89681	3.89681	3.89681	3.89681	3.89681	3.89681	3.89681	3.89681	3.89681
542	0.315834	0.592684	0.828907	1.03501	1.21198	1.39102	1.55651	1.69615	1.95837	2.04927	2.15581	2.25012	2.39459	2.48264	2.61683	2.77865	2.89244	2.92897	2.9543	3.01606	3.18686	3.33304	3.45312	3.57285	3.684	3.7739	3.85473	3.88297	3.94252	3.9618	3.96313	4.05113	4.14143	4.25348	4.25348	4.25348	4.25348	4.25348	4.25348	4.25348	4.25348
543	-0.881105	0.0319822	0.591982	0.981561	1.20348	1.46168	1.66807	1.86767	2.02755	2.31055	2.5517	2.71118	2.84547	2.88801	3.00745	3.0485	3.12777	3.21725	3.29221	3.37308	3.40781	3.43881	3.45139	3.47316	3.4896	3.54059	3.6121	3.62907	3.69788	3.92749	3.98789	3.98789	3.98789	3.98789	3.98789	3.98789	3.98789	3.98789	3.98789	3.98789	3.98789
544	-1.34097	0.270752	0.567956	0.809438	1.04768	1.23705	1.46352	1.68232	1.89136	2.00435	2.15702	2.27332	2.49273	2.58378	2.68262	2.76569	2.90479	3.0485	3.15563	3.27763	3.43112	3.55039	3.70914	3.73921	3.84066	3.85258	3.85258	3.85258	3.85258	3.85258	3.85258	3.85258	3.85258	3.85258	3.85258	3.85258	3.85258	3.85258	3.85258	3.85258	3.85258
545	-1.3069	-0.73789	-0.236535	0.177655	0.475369	0.76299	1.09424	1.33391	1.55454	1.77337	1.97501	2.14867	2.28073	2.41516	2.58344	2.77223	2.9714	3.13863	3.24102	3.32404	3.38739	3.47764	3.54305	3.56533	3.60579	3.71628	3.79342	3.87499	3.92358	3.97673	3.98485	3.98777	4.03941	4.06311	4.06311	4.06311	4.06311	4.06311	4.06311	4.06311	4.06311
546	-1.392	-0.705985	-0.437719	-0.178842	0.0858774	0.290347	0.644707	0.831495	1.00731	1.15539	1.39262	1.51639	1.70953	1.89076	1.98771	2.14398	2.26305	2.4223	2.55767	2.70066	2.80154	2.88684	2.96564	3.04508	3.14169	3.18398	3.27787	3.3342	3.36215	3.36793	3.43082	3.43236	3.43236	3.43236	3.43236	3.43236	3.43236	3.43236	3.43236	3.43236	3.43236
547	-0.910312	0.136372	0.492171	0.915913	1.23115	1.46661	1.6661	1.84204	2.01527	2.18627	2.3546	2.58138	2.74279	2.91299	3.04646	3.14784	3.22917	3.30859	3.46754	3.52641	3.65917	3.69099	3.74935	3.74935	3.74935	3.74935	3.74935	3.74935	3.74935	3.74935	3.74935	3.74935	3.74935	3.74935	3.74935	3.74935	3.74935	3.74935	3.74935	3.74935	3.74935
548	-1.57822	-1.17104	0.544409	0.955714	1.31702	1.56862	1.79154	1.98818	2.13184	2.27138	2.40032	2.53496	2.63301	2.72936	2.84012	2.92344	3.01924	3.06701	3.26566	3.3374	3.38892	3.42039	3.46721	3.49206	3.52712	3.539	3.539	3.539	3.539	3.539	3.539	3.539	3.539	3.539	3.539	3.539	3.539	3.539	3.539	3.539	3.539
549	-0.138202	0.659577	0.923187	1.11065	1.27227	1.42949	1.68278	1.84341	2.06399	2.26484	2.42785	2.60607	2.7653	2.95916	3.08976	3.17989	3.22656	3.2402	3.29451	3.30522	3.3281	3.36161	3.37374	3.39065	3.39065	3.39065	3.39065	3.39065	3.39065	3.39065	3.39065	3.39065	3.39065	3.39065	3.39065	3.39065	3.39065	3.39065	3.39065	3.39065	3.39065
550	0.429151	0.721423	0.917738	1.13623	1.31048	1.51495	1.68624	1.82938	2.09394	2.20473	2.30826	2.48642	2.60696	2.70848	2.79787	2.88169	2.99758	3.04329	3.199	3.34697	3.55644	3.70442	3.86977	3.93427	3.96493	3.98954	4.03492	4.03492	4.03492	4.03492	4.03492	4.03492	4.03492	4.03492	4.03492	4.03492	4.03492	4.03492	4.03492	4.03492	4.03492
551	-1.44428	-0.76399	0.765111	1.03708	1.39754	1.56423	1.75642	1.9514	2.12782	2.26248	2.42447	2.56107	2.68309	2.81766	2.91874	2.997	3.05	3.14491	3.25329	3.3322	3.38418	3.4195	3.47946	3.51474	3.51474	3.51474	3.51474	3.51474	3.51474	3.51474	3.51474	3.51474	3.51474	3.51474	3.51474	3.51474	3.51474	3.51474	3.51474	3.51474	3.51474
552	-0.0586033	0.314133	0.678895	0.828265	0.985377	1.15344	1.30515	1.44005	1.56837	1.66857	1.75801	1.8444	2.03001	2.1146	2.20719	2.35336	2.47191	2.59029	2.68727	2.77535	2.85999	3.05293	3.14425	3.28544	3.3355	3.37019	3.4039	3.45196	3.48323	3.57503	3.61027	3.64212	3.64212	3.64212	3.64212	3.64212	3.64212	3.64212	3.64212	3.64212	3.64212
553	-1.44149	-0.309639	0.140373	0.450464	0.680742	0.849492	0.99585	1.11904	1.28353	1.45483	1.60925	1.72258	1.91069	2.11725	2.27766	2.42426	2.68544	2.79644	2.95332	3.05587	3.10533	3.26996	3.28398	3.31358	3.32273	3.34748	3.51273	3.51962	3.53982	3.64105	3.75556	3.85644	3.90391	3.95566	3.98164	3.98198	3.99869	3.99869	3.99869	3.99869	3.99869
554	-0.172479	0.40159	0.780274	1.10772	1.3248	1.49292	1.61739	1.69429	1.89774	1.99965	2.11408	2.29072	2.37685	2.45214	2.50761	2.58382	2.68249	2.74552	2.88769	2.96421	3.0468	3.14118	3.19772	3.25772	3.29355	3.32876	3.46072	3.47891	3.52552	3.60967	3.72974	3.79615	3.8925	3.93461	3.93461	3.93461	3.93461	3.93461	3.93461	3.93461	3.93461
555	-0.570233	-0.0639861	0.232423	0.571534	0.92133	1.22986	1.42823	1.64631	1.83324	1.99283	2.1899	2.34589	2.4665	2.54629	2.62564	2.72164	2.87393	3.00143	3.17575	3.23306	3.27631	3.31465	3.43531	3.51586	3.62646	3.74004	3.80129	3.85001	3.92554	3.94614	3.94614	3.94614	3.94614	3.94614	3.94614	3.94614	3.94614	3.94614	3.94614	3.94614	3.94614
556	-1.21563	-0.047331	0.624677	0.886443	1.09727	1.33229	1.54789	1.77677	1.94885	2.0863	2.23752	2.40635	2.51247	2.64926	2.84287	2.89962	3.01301	3.09083	3.24083	3.32556	3.37865	3.41985	3.47555	3.50648	3.56391	3.66677	3.71507	3.75723	3.85721	3.92982	4.01486	4.05748	4.05776	4.11253	4.14566	4.19024	4.19024	4.19024	4.19024	4.19024	4.19024
557	-0.507853	-0.120876	0.213018	0.464413	0.642811	0.784747	1.01508	1.19461	1.28395	1.49706	1.64747	1.84477	1.96633	2.05389	2.13869	2.24096	2.38517	2.48084	2.65431	2.8101	3.03857	3.24434	3.29887	3.36499	3.42891	3.51878	3.6102	3.7007	3.85035	3.9071	4.01846	4.03536	4.05026	4.0718	4.17351	4.23715	4.25199	4.26012	4.31311	4.31311	4.31311
558	-0.349308	0.376486	0.852011	1.20841	1.49269	1.66905	1.82445	1.99694	2.15077	2.34779	2.47271	2.57349	2.6847	2.79735	2.86246	2.94643	3.11796	3.17491	3.22034	3.22034	3.22034	3.22034	3.22034	3.22034	3.22034	3.22034	3.22034	3.22034	3.22034	3.22034	3.22034	3.22034	3.22034	3.22034	3.22034	3.22034	3.22034	3.22034	3.22034	3.22034	3.22034
559	0.719945	1.12854	1.39934	1.67098	1.88749	2.02597	2.26307	2.37093	2.49895	2.59568	2.67913	2.86065	2.95806	3.00959	3.06279	3.13592	3.23079	3.32531	3.36697	3.41288	3.42455	3.61517	3.71549	3.7788	3.83692	3.83692	3.83692	3.83692	3.83692	3.83692	3.83692	3.83692	3.83692	3.83692	3.83692	3.83692	3.83692	3.83692	3.83692	3.83692	3.83692
560	-0.722313	0.074531	0.638188	0.79796	1.03125	1.1976	1.38597	1.53328	1.74702	1.88643	2.02947	2.23235	2.34475	2.45992	2.61031	2.73793	2.85855	2.9647	3.0533	3.19543	3.2714	3.3064	3.38559	3.41563	3.53205	3.5425	3.55801	3.59239	3.65618	3.65618	3.65618	3.65618	3.65618	3.65618	3.65618	3.65618	3.65618	3.65618	3.65618	3.65618	3.65618
561	0.403985	0.716632	1.02619	1.32475	1.4924	1.6547	1.80273	2.00043	2.11738	2.24915	2.36837	2.50361	2.63468	2.75176	2.87284	3.00636	3.1638	3.36071	3.46686	3.54591	3.64165	3.70256	3.76023	3.85975	3.91375	3.92863	3.97133	4.02306	4.04025	4.04025	4.04025	4.04025	4.04025	4.04025	4.04025	4.04025	4.04025	4.04025	4.04025	4.04025	4.04025
562	-1.30881	0.0575339	0.837245	1.26123	1.48986	1.73963	1.93704	2.08938	2.25239	2.3843	2.59693	2.73083	2.89134	3.16569	3.29542	3.39942	3.48972	3.58372	3.6488	3.69772	3.76742	3.87843	3.90667	3.90667	3.90667	3.90667	3.90667	3.90667	3.90667	3.90667	3.90667	3.90667	3.90667	3.90667	3.90667	3.90667	3.90667	3.90667	3.90667	3.90667	3.90667
563	1.16722	1.40524	1.59682	1.75317	2.02072	2.21599	2.42606	2.5344	2.64743	2.79944	2.92001	3.05132	3.14828	3.23485	3.29195	3.47199	3.52888	3.58082	3.69522	3.73841	3.8039	3.84266	3.91476	3.98842	3.99872	4.0992	4.15998	4.15998	4.15998	4.15998	4.15998	4.15998	4.15998	4.15998	4.15998	4.15998	4.15998	4.15998	4.15998	4.15998	4.15998
564	0.119271	0.429856	0.731937	1.03332	1.29096	1.49095	1.68634	1.87045	2.04036	2.19624	2.36134	2.68847	2.82449	2.97198	3.10573	3.21574	3.33493	3.49911	3.57679	3.68643	3.74428	3.74841	3.84817	3.84817	3.84817	3.84817	3.84817	3.84817	3.84817	3.84817	3.84817	3.84817	3.84817	3.84817	3.84817	3.84817	3.84817	3.84817	3.84817	3.84817	3.84817
565	-1.39211	-0.331424	0.553476	0.814169	1.10309	1.33483	1.55013	1.80351	1.95999	2.06815	2.29264	2.51822	2.61945	2.76663	2.85671	2.96958	3.04124	3.1148	3.155	3.17548	3.19601	3.26896	3.33277	3.37159	3.40096	3.44604	3.47956	3.52474	3.54108	3.54333	3.54333	3.54333	3.54333	3.54333	3.54333	3.54333	3.54333	3.54333	3.54333	3.54333	3.54333
566	-0.933864	-0.300225	0.398956	0.783776	1.06513	1.28341	1.48593	1.68182	1.87097	2.02015	2.155	2.35615	2.51031	2.62219	2.72422	2.82079	2.89967	2.95302	3.01019	3.07604	3.15878	3.21586	3.30649	3.37892	3.45126	3.57314	3.6112	3.64326	3.7191	3.75241	3.75317	3.75317	3.75317	3.75317	3.75317	3.75317	3.75317	3.75317	3.75317	3.75317	3.75317
567	1.01656	1.23466	1.52536	1.69787	1.94423	2.06576	2.30309	2.43911	2.57099	2.66705	2.7716	2.86334	2.98289	3.06977	3.19795	3.27485	3.34635	3.40207	3.44733	3.47921	3.69124	3.76072	3.7886	3.84808	3.87111	3.91825	4.04685	4.04685	4.04685	4.04685	4.04685	4.04685	4.04685	4.04685	4.04685	4.04685	4.04685	4.04685	4.04685	4.04685	4.04685
568	0.353714	0.731187	0.962639	1.15362	1.40591	1.55785	1.72619	2.02519	2.18638	2.36309	2.51525	2.72617	3.07409	3.24049	3.36609	3.47258	3.56025	3.6697	3.77698	3.85759	3.95044	4.04434	4.11369	4.1369	4.1369	4.1369	4.1369	4.1369	4.1369	4.1369	4.1369	4.1369	4.1369	4.1369	4.1369	4.1369	4.1369	4.1369	4.1369	4.1369	4.1369
569	0.442297	1.04363	1.3185	1.65409	1.85621	2.06547	2.24951	2.43163	2.55917	2.67247	2.89935	2.99179	3.14856	3.22069	3.28509	3.38208	3.52012	3.61412	3.6655	3.6655	3.6655	3.6655	3.6655	3.6655	3.6655	3.6655	3.6655	3.6655	3.6655	3.6655	3.6655	3.6655	3.6655	3.6655	3.6655	3.6655	3.6655	3.6655	3.6655	3.6655	3.6655
570	-1.42492	-0.107364	0.740591	1.08746	1.32465	1.51011	1.65581	1.77428	2.00653	2.11642	2.40259	2.55262	2.65637	2.72992	2.82186	2.86963	2.96232	3.07056	3.23691	3.27799	3.59931	3.68676	3.76537	3.83385	3.8762	4.03658	4.0758	4.11999	4.24165	4.40896	4.49325	4.49325	4.49325	4.49325	4.49325	4.49325	4.49325	4.49325	4.49325	4.49325	4.49325
571	-1.42831	-1.31907	-1.09177	0.78207	1.13259	1.38817	1.61764	1.80145	1.98604	2.17288	2.33539	2.47086	2.60434	2.7017	2.80998	2.86658	2.93088	3.12686	3.3215	3.35874	3.38168	3.45491	3.50089	3.57419	3.60108	3.62963	3.63535	3.67509	3.84635	3.92115	3.97441	4.01039	4.07332	4.07332	4.07332	4.07332	4.07332	4.07332	4.07332	4.07332	4.07332
572	-0.616554	0.346605	0.626361	0.857766	1.10374	1.34921	1.53797	1.72497	1.92032	2.1078	2.2744	2.46835	2.62617	2.77145	3.10539	3.27482	3.41806	3.50491	3.57656	3.64851	3.79687	3.95959	4.08238	4.08238	4.08238	4.08238	4.08238	4.08238	4.08238	4.08238	4.08238	4.08238	4.08238	4.08238	4.08238	4.08238	4.08238	4.08238	4.08238	4.08238	4.08238
573	-1.39985	-1.17799	-1.0376	-0.579006	-0.171564	0.108827	0.34884	0.58516	0.758435	0.927344	1.09061	1.26053	1.38945	1.51207	1.59707	1.7139	1.79661	1.86883	1.98784	2.06133	2.14829	2.27663	2.40445	2.5641	2.72851	2.86159	2.92087	3.18039	3.23406	3.30833	3.33925	3.3543	3.41803	3.4395	3.45423	3.52824	3.64752	3.68206	3.69897	3.73039	3.73039
574	-0.224263	0.183496	0.468422	0.756559	1.10274	1.30371	1.58723	1.82212	2.0195	2.21938	2.38136	2.55514	2.81837	2.94778	3.06137	3.17418	3.27179	3.31848	3.41475	3.58257	3.62831	3.74303	3.84746	3.89238	4.0369	4.05332	4.07958	4.11869	4.41069	4.42061	4.42061	4.42061	4.42061	4.42061	4.42061	4.42061	4.42061	4.42061	4.42061	4.42061	4.42061
575	-1.13028	0.153108	0.491865	0.844296	1.13399	1.3375	1.67571	1.84876	2.00658	2.13242	2.38629	2.53664	2.63213	2.72602	2.86098	2.96708	3.11641	3.24663	3.40021	3.52319	3.65309	3.79153	3.92842	3.94942	4.01727	4.12613	4.15704	4.26936	4.31576	4.33285	4.37871	4.37871	4.37871	4.37871	4.37871	4.37871	4.37871	4.37871	4.37871	4.37871	4.37871
576	0.443641	0.768816	1.12733	1.41039	1.65586	1.82885	2.01217	2.2651	2.48408	2.64971	2.80158	3.11088	3.25157	3.4112	3.47747	3.52349	3.52476	3.53254	3.59974	3.78503	3.8693	3.97498	4.08942	4.16397	4.16397	4.16397	4.16397	4.16397	4.16397	4.16397	4.16397	4.16397	4.16397	4.16397	4.16397	4.16397	4.16397	4.16397	4.16397	4.16397	4.16397
577	-0.107932	0.47169	0.679154	0.938194	1.1649	1.34959	1.50953	1.67716	1.83267	1.96509	2.0837	2.2474	2.38778	2.51875	2.62574	2.77352	2.86762	3.02879	3.10197	3.14249	3.25144	3.3764	3.42058	3.48185	3.52348	3.61372	3.64922	3.69971	3.71513	3.74855	3.83319	3.83319	3.83319	3.83319	3.83319	3.83319	3.83319	3.83319	3.83319	3.83319	3.83319
578	-0.0200329	0.453253	0.784799	0.9941	1.13601	1.23835	1.3412	1.44417	1.53493	1.64226	1.79345	1.94576	2.0575	2.20249	2.44026	2.58531	2.8089	2.88485	3.06014	3.17522	3.29533	3.39971	3.46636	3.53366	3.58099	3.6474	3.71117	3.78774	3.83837	3.89604	4.00792	4.01229	4.03667	4.03667	4.03667	4.03667	4.03667	4.03667	4.03667	4.03667	4.03667
579	0.295692	0.571874	0.868673	1.11243	1.3422	1.54698	1.85638	2.08823	2.30168	2.5455	2.71029	2.93121	3.08365	3.21508	3.322	3.4847	3.65276	3.75209	3.82786	3.88523	3.95728	3.99239	4.30819	4.45611	4.46334	4.47345	4.47345	4.47345	4.47345	4.47345	4.47345	4.47345	4.47345	4.47345	4.47345	4.47345	4.47345	4.47345	4.47345	4.47345	4.47345
580	0.599179	0.936876	1.17229	1.34007	1.47679	1.60607	1.789	1.93618	2.05152	2.12797	2.24593	2.32955	2.40902	2.55341	2.66916	2.74431	2.82137	3.09325	3.20729	3.36866	3.49375	3.54993	3.54993	3.54993	3.54993	3.54993	3.54993	3.54993	3.54993	3.54993	3.54993	3.54993	3.54993	3.54993	3.54993	3.54993	3.54993	3.54993	3.54993	3.54993	3.54993
581	-1.28117	-0.650335	-0.0218835	0.531756	0.946231	1.39832	1.56334	1.71553	1.87542	2.02978	2.17557	2.31141	2.41204	2.54106	2.64753	2.74821	2.84019	2.93387	3.07567	3.18816	3.28427	3.3465	3.41091	3.47777	3.51682	3.60302	3.61611	3.63066	3.66104	3.69079	3.70502	3.72079	3.73649	3.73899	3.74467	3.76473	3.76473	3.76473	3.76473	3.76473	3.76473
582	0.486326	0.828533	1.11619	1.26568	1.40558	1.58194	1.75372	1.8859	2.00049	2.34197	2.46799	2.55503	2.76337	2.87246	3.01984	3.09946	3.16372	3.22314	3.39784	3.48519	3.61448	3.76546	3.80261	3.84995	3.85509	3.92598	4.07507	4.10175	4.10175	4.10175	4.10175	4.10175	4.10175	4.10175	4.10175	4.10175	4.10175	4.10175	4.10175	4.10175	4.10175
583	-0.759497	0.134547	0.587024	0.895181	1.13071	1.32484	1.55819	1.76954	2.00719	2.21499	2.39814	2.56459	2.74313	2.89375	3.00223	3.17269	3.23964	3.31708	3.45202	3.4703	3.54749	3.5629	3.61535	3.61535	3.61535	3.61535	3.61535	3.61535	3.61535	3.61535	3.61535	3.61535	3.61535	3.61535	3.61535	3.61535	3.61535	3.61535	3.61535	3.61535	3.61535
584	-1.42975	0.841744	1.3903	1.58508	1.75462	1.9131	2.00257	2.11459	2.19922	2.47372	2.61794	2.72232	2.82177	2.93336	3.12986	3.25749	3.41656	3.56901	3.65273	3.73568	3.79126	3.88819	3.89693	3.89693	3.89693	3.89693	3.89693	3.89693	3.89693	3.89693	3.89693	3.89693	3.89693	3.89693	3.89693	3.89693	3.89693	3.89693	3.89693	3.89693	3.89693
585	-1.21289	0.175573	0.890205	1.11292	1.34506	1.53132	1.6913	1.83153	1.97597	2.0994	2.21298	2.2921	2.47855	2.65761	2.77097	2.95392	3.01857	3.07193	3.11998	3.22695	3.37662	3.53901	3.70988	3.75682	3.77482	3.83314	3.85739	3.8796	3.88537	3.88537	3.88537	3.88537	3.88537	3.88537	3.88537	3.88537	3.88537	3.88537	3.88537	3.88537	3.88537
586	-0.935882	0.698758	1.07609	1.33474	1.66667	1.9803	2.24329	2.45827	2.61597	2.78572	2.8917	3.01199	3.23327	3.38633	3.46751	3.50273	3.51203	3.51453	3.52897	3.52897	3.52897	3.52897	3.52897	3.52897	3.52897	3.52897	3.52897	3.52897	3.52897	3.52897	3.52897	3.52897	3.52897	3.52897	3.52897	3.52897	3.52897	3.52897	3.52897	3.52897	3.52897
587	-1.0682	0.525342	0.821056	1.04565	1.22258	1.37977	1.52667	1.65526	1.77314	1.9003	2.01308	2.13438	2.27559	2.39532	2.51842	2.65441	2.77182	2.85871	2.93242	3.00477	3.15963	3.29586	3.41104	3.49028	3.57696	3.65857	3.72112	3.77048	3.81161	3.84462	3.8726	3.8726	3.8726	3.8726	3.8726	3.8726	3.8726	3.8726	3.8726	3.8726	3.8726
588	0.153805	0.52813	0.770225	0.886628	1.01356	1.13805	1.25039	1.40977	1.51329	1.60865	1.71161	1.81055	1.90493	1.99726	2.16473	2.26017	2.44527	2.53457	2.61955	2.69059	2.78701	2.86288	2.92665	2.95768	2.99805	3.0109	3.02114	3.02425	3.02425	3.02425	3.02425	3.02425	3.02425	3.02425	3.02425	3.02425	3.02425	3.02425	3.02425	3.02425	3.02425
589	-1.31815	-0.65137	0.583272	0.865057	1.07441	1.26397	1.39433	1.50733	1.6161	1.77735	2.01346	2.13476	2.21469	2.47754	2.5517	2.67361	2.75708	2.83136	2.94247	2.9924	3.10928	3.15495	3.23336	3.41114	3.55253	3.59649	3.6099	3.64488	3.64488	3.64488	3.64488	3.64488	3.64488	3.64488	3.64488	3.64488	3.64488	3.64488	3.64488	3.64488	3.64488
590	-1.36852	-0.837669	-0.327768	0.0582126	0.401225	0.671281	0.911332	1.1104	1.27591	1.43925	1.59465	1.79594	2.0343	2.16856	2.29897	2.47037	2.61869	2.74099	2.86534	2.9593	3.08832	3.14149	3.252	3.35467	3.40964	3.4545	3.51429	3.67196	3.67196	3.67196	3.67196	3.67196	3.67196	3.67196	3.67196	3.67196	3.67196	3.67196	3.67196	3.67196	3.67196
591	0.631238	0.995051	1.20488	1.34471	1.45281	1.57132	1.66934	1.80062	1.94295	2.02201	2.16821	2.38695	2.46306	2.55878	2.63109	2.69078	2.73615	2.7966	2.8289	2.8925	2.91925	2.92432	2.9796	3.03112	3.12889	3.12905	3.30303	3.30303	3.30303	3.30303	3.30303	3.30303	3.30303	3.30303	3.30303	3.30303	3.30303	3.30303	3.30303	3.30303	3.30303
592	-0.931383	-0.064369	0.402086	0.76305	0.947527	1.11597	1.22329	1.34011	1.43656	1.51806	1.58704	1.75358	1.957	2.11836	2.25002	2.37966	2.54401	2.58956	2.68587	2.80024	2.87157	2.91667	2.99258	3.03933	3.03933	3.03933	3.03933	3.03933	3.03933	3.03933	3.03933	3.03933	3.03933	3.03933	3.03933	3.03933	3.03933	3.03933	3.03933	3.03933	3.03933
593	-0.846569	0.0649135	0.327268	0.527778	0.728168	0.910708	1.06555	1.3162	1.45985	1.66036	1.81169	1.91477	2.03567	2.10377	2.21096	2.29531	2.4258	2.51057	2.58718	2.65532	2.75248	2.82213	2.89016	2.93628	2.95084	3.03863	3.13559	3.13559	3.13559	3.13559	3.13559	3.13559	3.13559	3.13559	3.13559	3.13559	3.13559	3.13559	3.13559	3.13559	3.13559
594	-1.55815	-1.04111	-0.601041	0.347511	0.657441	1.02401	1.26823	1.49661	1.68729	1.88147	2.04155	2.20195	2.32581	2.44249	2.58932	2.74444	2.93014	3.11474	3.27655	3.41922	3.49783	3.56588	3.58972	3.61883	3.63713	3.72995	3.77826	3.81059	3.81059	3.81059	3.81059	3.81059	3.81059	3.81059	3.81059	3.81059	3.81059	3.81059	3.81059	3.81059	3.81059
595	-0.793617	0.333954	0.688361	0.97657	1.22308	1.46784	1.77901	2.00646	2.22377	2.43572	2.63574	2.81327	2.9917	3.04326	3.15168	3.26862	3.31742	3.39709	3.45151	3.50259	3.55783	3.59418	3.75749	3.79122	3.91244	3.95825	3.99315	4.01785	4.03553	4.06005	4.11027	4.11027	4.11027	4.11027	4.11027	4.11027	4.11027	4.11027	4.11027	4.11027	4.11027
596	-1.32291	0.360267	0.917038	1.11757	1.34863	1.55395	1.79645	1.97067	2.16328	2.38453	2.57417	2.76008	2.90496	3.03249	3.14523	3.24167	3.33095	3.49191	3.58887	3.6683	3.72754	3.78066	3.80364	3.83609	3.84298	3.97752	4.06183	4.13745	4.14139	4.23242	4.23242	4.23242	4.23242	4.23242	4.23242	4.23242	4.23242	4.23242	4.23242	4.23242	4.23242
597	-1.52945	-1.18994	0.5686	0.92843	1.22184	1.46556	1.64991	1.78848	1.9319	2.07985	2.23765	2.37456	2.53481	2.65824	2.75571	2.85229	2.9216	2.94984	3.12735	3.13771	3.20793	3.21476	3.2275	3.30792	3.38476	3.48705	3.55543	3.55547	3.55547	3.55547	3.55547	3.55547	3.55547	3.55547	3.55547	3.55547	3.55547	3.55547	3.55547	3.55547	3.55547
598	-1.23036	0.157391	0.614397	0.882379	1.15109	1.36506	1.50284	1.65772	1.84654	2.05316	2.18519	2.32587	2.46074	2.58654	2.70803	2.79562	2.87547	2.95796	3.00994	3.06886	3.11841	3.40083	3.48084	3.6501	3.69383	3.73404	3.76477	3.81373	3.81974	3.9228	3.9228	3.9228	3.9228	3.9228	3.9228	3.9228	3.9228	3.9228	3.9228	3.9228	3.9228
599	-1.156	0.555459	0.865437	1.15013	1.45042	1.68557	2.01777	2.25183	2.49018	2.70164	2.80267	2.94907	3.04936	3.18288	3.23394	3.30217	3.40518	3.49581	3.57873	3.63507	3.70856	3.72886	3.75775	3.78313	3.80117	3.91329	4.07331	4.28664	4.28664	4.28664	4.28664	4.28664	4.28664	4.28664	4.28664	4.28664	4.28664	4.28664	4.28664	4.28664	4.28664
600	0.609857	0.909257	1.17328	1.41444	1.55805	1.80847	1.95024	2.08481	2.2935	2.47618	2.59085	2.71528	2.8369	2.93016	2.99957	3.12812	3.24855	3.38925	3.50052	3.56443	3.62468	3.67518	3.7487	3.75484	3.75927	3.7701	3.81214	3.88802	3.88802	3.88802	3.88802	3.88802	3.88802	3.88802	3.88802	3.88802	3.88802	3.88802	3.88802	3.88802	3.88802
601	-1.44081	-0.255284	0.102363	0.36426	0.725496	0.98238	1.13206	1.33431	1.50727	1.64099	1.83918	2.01029	2.12312	2.2177	2.38983	2.45836	2.5428	2.62141	2.74102	2.87235	3.05233	3.18285	3.23295	3.36608	3.49867	3.5462	3.69928	3.79145	3.85677	3.90096	3.93693	3.96806	3.99958	4.00124	4.06363	4.06733	4.11019	4.22126	4.23035	4.27588	4.2828
602	-1.47766	-1.03289	0.00916064	0.581929	0.87755	1.08307	1.29957	1.62198	1.79287	2.0063	2.17371	2.36326	2.45947	2.56612	2.65275	2.69784	2.75902	2.849	2.91094	2.94456	3.08148	3.12736	3.13647	3.18484	3.31032	3.34241	3.47258	3.49132	3.4962	3.66045	3.6861	3.82383	3.83222	3.85798	3.88395	3.93675	3.97063	3.9717	4.13067	4.13067	4.13067
603	0.00405717	0.608371	0.995108	1.3653	1.56698	1.7578	1.92664	2.15944	2.32542	2.53063	2.68571	2.85159	2.98565	3.10633	3.26348	3.48487	3.57841	3.68693	3.77312	3.88135	4.01887	4.07704	4.13986	4.24485	4.31832	4.37823	4.38058	4.47452	4.56425	4.60362	4.77442	4.77442	4.77442	4.77442	4.77442	4.77442	4.77442	4.77442	4.77442	4.77442	4.77442
604	-1.2117	-0.0730606	0.378423	0.891199	1.1067	1.26838	1.40365	1.51166	1.79221	1.92566	2.03373	2.23934	2.38962	2.49051	2.56893	2.70486	2.78047	2.88094	2.949	3.00783	3.08987	3.18478	3.28531	3.36962	3.45359	3.50987	3.57463	3.6679	3.74951	3.81386	3.879	3.879	3.879	3.879	3.879	3.879	3.879	3.879	3.879	3.879	3.879
605	-0.0323877	0.431908	0.811388	1.08492	1.34076	1.496	1.64029	1.77017	1.88836	1.96664	2.07348	2.14864	2.21203	2.25833	2.36534	2.53317	2.60184	2.63678	2.65188	2.66665	2.81272	2.87916	2.91259	2.99574	3.04199	3.06123	3.17805	3.28642	3.36489	3.45343	3.50673	3.61459	3.61459	3.61459	3.61459	3.61459	3.61459	3.61459	3.61459	3.61459	3.61459
606	-1.05517	-0.544973	0.182595	0.508399	0.87106	1.20309	1.45262	1.60811	1.78392	1.92335	2.17094	2.4455	2.59646	2.72808	2.87871	2.98112	3.0835	3.14459	3.20059	3.45684	3.54485	3.62784	3.6727	3.70032	3.72293	3.73254	3.74247	3.82058	3.82651	3.88715	3.97498	3.97498	3.97498	3.97498	3.97498	3.97498	3.97498	3.97498	3.97498	3.97498	3.97498
607	-0.0635915	0.328857	0.537258	0.856231	1.02811	1.26988	1.45686	1.639	1.88398	2.03961	2.2498	2.47049	2.63692	2.78428	2.9457	3.06194	3.14127	3.24229	3.31455	3.38877	3.42034	3.52235	3.55701	3.57732	3.63684	3.67223	3.69293	3.69293	3.69293	3.69293	3.69293	3.69293	3.69293	3.69293	3.69293	3.69293	3.69293	3.69293	3.69293	3.69293	3.69293
608	0.37285	0.722914	1.02313	1.22062	1.37485	1.56398	1.72974	1.93859	2.10945	2.27536	2.45992	2.59045	2.72066	2.8512	2.96731	3.09679	3.1926	3.28447	3.41274	3.45474	3.51834	3.58148	3.63776	3.70384	3.72285	3.73381	3.74245	3.74351	3.78992	3.8151	3.82989	3.85663	3.90273	3.91003	3.91003	3.91003	3.91003	3.91003	3.91003	3.91003	3.91003
609	-0.576159	0.495601	0.767871	1.06127	1.31635	1.52839	1.66476	1.80962	1.95882	2.09059	2.35722	2.44142	2.51516	2.65225	2.80831	2.89677	2.9645	3.03617	3.06351	3.08842	3.16852	3.26238	3.33747	3.39524	3.44996	3.53817	3.64309	3.75209	3.76954	3.8017	3.81432	3.85746	3.88244	3.90699	4.00785	4.07184	4.12702	4.20812	4.20812	4.20812	4.20812
610	-0.0360629	0.422644	0.701994	0.916596	1.13011	1.37148	1.56291	1.75858	1.90753	2.13187	2.31294	2.50286	2.63704	2.75621	2.84375	3.01322	3.09766	3.23822	3.35485	3.39781	3.52479	3.56357	3.56357	3.56357	3.56357	3.56357	3.56357	3.56357	3.56357	3.56357	3.56357	3.56357	3.56357	3.56357	3.56357	3.56357	3.56357	3.56357	3.56357	3.56357	3.56357
611	0.295815	0.898037	1.25891	1.59192	1.88732	2.14813	2.36324	2.52941	2.65182	2.78432	2.87792	2.97296	3.03185	3.06696	3.15193	3.1833	3.23852	3.26617	3.40333	3.47106	3.59397	3.6135	3.62865	3.68286	3.69197	3.7493	3.78782	3.87972	3.88908	3.88908	3.88908	3.88908	3.88908	3.88908	3.88908	3.88908	3.88908	3.88908	3.88908	3.88908	3.88908
612	-0.810877	0.335008	0.627991	0.846876	1.06436	1.24027	1.44444	1.64431	1.85745	2.00323	2.12346	2.30175	2.56575	2.78432	3.07407	3.28933	3.40533	3.48032	3.54119	3.59332	3.64797	3.68505	3.79815	3.80317	3.80317	3.80317	3.80317	3.80317	3.80317	3.80317	3.80317	3.80317	3.80317	3.80317	3.80317	3.80317	3.80317	3.80317	3.80317	3.80317	3.80317
613	-1.39209	-0.802	0.358063	0.648281	0.86848	1.07325	1.26048	1.47231	1.64546	1.80293	1.98656	2.27229	2.42675	2.53626	2.62487	2.72781	2.82361	2.94438	3.06446	3.17851	3.28548	3.39623	3.50474	3.57286	3.58686	3.75697	3.82744	3.92638	3.95757	3.95757	3.95757	3.95757	3.95757	3.95757	3.95757	3.95757	3.95757	3.95757	3.95757	3.95757	3.95757
614	-0.291709	0.217672	0.41581	0.718152	0.910214	1.18611	1.39495	1.72493	2.01921	2.26085	2.43844	2.61127	2.75601	2.88515	2.9835	3.09671	3.25691	3.35359	3.4668	3.56023	3.63222	3.73891	3.7936	3.89072	4.01117	4.02481	4.02481	4.02481	4.02481	4.02481	4.02481	4.02481	4.02481	4.02481	4.02481	4.02481	4.02481	4.02481	4.02481	4.02481	4.02481
615	-1.21692	-0.519354	-0.303433	0.287169	0.84181	0.994978	1.14972	1.28406	1.42252	1.53124	1.65088	1.74836	1.81398	1.8546	1.90851	1.96404	2.01253	2.0599	2.10161	2.17267	2.22613	2.25266	2.28676	2.30248	2.37188	2.37881	2.39079	2.40233	2.44277	2.44277	2.44277	2.44277	2.44277	2.44277	2.44277	2.44277	2.44277	2.44277	2.44277	2.44277	2.44277
616	0.145764	0.565118	0.948555	1.21975	1.56574	1.79099	1.98094	2.14194	2.48838	2.62724	2.75699	2.88611	2.99883	3.09501	3.19056	3.27532	3.30533	3.35569	3.42462	3.52885	3.59865	3.68617	3.71977	3.73982	3.73982	3.73982	3.73982	3.73982	3.73982	3.73982	3.73982	3.73982	3.73982	3.73982	3.73982	3.73982	3.73982	3.73982	3.73982	3.73982	3.73982
617	0.10312	0.456288	0.814167	1.16358	1.45996	1.65654	1.81489	1.96624	2.15937	2.34055	2.47827	2.61277	2.7879	2.89939	3.01258	3.14605	3.17501	3.23685	3.39607	3.45336	3.52302	3.65476	3.70614	3.70724	3.72203	3.73534	3.75283	3.78257	3.869	3.90882	3.90882	3.90882	3.90882	3.90882	3.90882	3.90882	3.90882	3.90882	3.90882	3.90882	3.90882
618	-0.19477	0.944731	1.21922	1.44102	1.62265	1.78556	1.94078	2.04561	2.19291	2.28722	2.50197	2.62746	2.74645	2.86057	2.95491	3.0325	3.17618	3.27652	3.31616	3.35147	3.37818	3.4051	3.43876	3.50793	3.63558	3.77168	3.80174	3.8487	3.86426	3.86426	3.86426	3.86426	3.86426	3.86426	3.86426	3.86426	3.86426	3.86426	3.86426	3.86426	3.86426
619	-1.40899	-0.491768	0.35469	0.795832	1.06846	1.33332	1.58072	1.84133	2.09759	2.1908	2.32676	2.41701	2.54054	2.63118	2.71601	2.91981	3.04735	3.37084	3.4999	3.55488	3.59862	3.6521	3.72366	3.72366	3.72366	3.72366	3.72366	3.72366	3.72366	3.72366	3.72366	3.72366	3.72366	3.72366	3.72366	3.72366	3.72366	3.72366	3.72366	3.72366	3.72366
620	-1.31042	-0.655145	-0.051995	0.536108	0.886616	1.21177	1.44516	1.62483	1.82525	1.98376	2.18482	2.35495	2.48007	2.65023	2.83541	2.92357	3.01865	3.13919	3.21551	3.29346	3.43438	3.47048	3.49406	3.59239	3.60524	3.71998	3.77873	3.79499	3.9081	3.9081	3.9081	3.9081	3.9081	3.9081	3.9081	3.9081	3.9081	3.9081	3.9081	3.9081	3.9081
621	0.488227	0.796357	1.0279	1.22441	1.43253	1.64809	1.82315	1.98628	2.14753	2.26528	2.38612	2.4967	2.59779	2.69584	2.76983	2.8256	2.90571	2.93498	3.06453	3.08832	3.16742	3.20251	3.22765	3.24744	3.40121	3.42261	3.42784	3.42784	3.42784	3.42784	3.42784	3.42784	3.42784	3.42784	3.42784	3.42784	3.42784	3.42784	3.42784	3.42784	3.42784
622	-1.38158	-0.000842214	1.05611	1.39145	1.85874	2.21762	2.3956	2.61745	2.80483	2.95132	3.01423	3.067	3.1336	3.18172	3.31776	3.36622	3.39573	3.40645	3.49853	3.60281	3.64147	3.66319	3.66319	3.66319	3.66319	3.66319	3.66319	3.66319	3.66319	3.66319	3.66319	3.66319	3.66319	3.66319	3.66319	3.66319	3.66319	3.66319	3.66319	3.66319	3.66319
623	-0.19324	0.898264	1.19522	1.47549	1.74164	1.98891	2.25892	2.54352	2.75779	2.93998	3.10781	3.28263	3.4462	3.59901	3.68237	3.73283	3.79705	3.83343	3.84676	4.06652	4.15268	4.15268	4.15268	4.15268	4.15268	4.15268	4.15268	4.15268	4.15268	4.15268	4.15268	4.15268	4.15268	4.15268	4.15268	4.15268	4.15268	4.15268	4.15268	4.15268	4.15268
624	0.606574	0.977366	1.33324	1.68276	1.97692	2.26505	2.41876	2.51005	2.64739	2.7661	2.85214	2.95349	3.19888	3.42093	3.56415	3.66324	3.69467	3.75469	3.79787	3.84953	3.94443	3.97429	4.09767	4.15305	4.15305	4.15305	4.15305	4.15305	4.15305	4.15305	4.15305	4.15305	4.15305	4.15305	4.15305	4.15305	4.15305	4.15305	4.15305	4.15305	4.15305
625	0.833935	1.19512	1.44915	1.64966	1.85174	2.01733	2.18184	2.4253	2.50236	2.57978	2.64464	2.70629	2.788	2.91976	3.01186	3.0698	3.09036	3.19621	3.21855	3.29348	3.48068	3.57014	3.63375	3.71062	3.74918	3.76039	3.76106	3.76106	3.76106	3.76106	3.76106	3.76106	3.76106	3.76106	3.76106	3.76106	3.76106	3.76106	3.76106	3.76106	3.76106
626	-1.37911	0.209737	0.52104	0.774945	1.04173	1.29061	1.49355	1.67714	1.88798	2.06645	2.21107	2.34573	2.49047	2.58957	2.67941	2.82321	2.9344	2.96804	3.20821	3.24255	3.46709	3.50708	3.56835	3.62006	3.62006	3.62006	3.62006	3.62006	3.62006	3.62006	3.62006	3.62006	3.62006	3.62006	3.62006	3.62006	3.62006	3.62006	3.62006	3.62006	3.62006
627	-0.0666909	0.191363	0.448442	0.6357	0.842061	0.937074	1.15571	1.42827	1.67315	1.81707	2.00613	2.14611	2.28966	2.40119	2.44274	2.50071	2.62887	2.71246	2.83851	2.87436	2.89464	3.07053	3.11224	3.14884	3.22156	3.27274	3.30589	3.30589	3.30589	3.30589	3.30589	3.30589	3.30589	3.30589	3.30589	3.30589	3.30589	3.30589	3.30589	3.30589	3.30589
628	-1.504	-0.467963	0.558779	0.873038	1.1299	1.24853	1.51281	1.61654	1.72804	1.83116	1.91439	1.97398	2.08922	2.23662	2.38383	2.46125	2.62009	2.66784	2.79087	3.01626	3.18101	3.28329	3.42365	3.50528	3.5653	3.65427	3.779	3.95997	3.97659	3.97659	3.97659	3.97659	3.97659	3.97659	3.97659	3.97659	3.97659	3.97659	3.97659	3.97659	3.97659
629	0.208983	0.488968	0.666472	0.837255	1.01066	1.16107	1.3091	1.53935	1.74219	1.88214	2.0494	2.19181	2.28657	2.50726	2.78521	2.85213	2.91711	2.94082	3.03395	3.07738	3.13888	3.14778	3.44073	3.48108	3.4856	3.52485	3.54703	3.55162	3.55247	3.56901	3.57109	3.57331	3.59986	3.59986	3.59986	3.59986	3.59986	3.59986	3.59986	3.59986	3.59986
630	-1.41208	0.432789	0.785776	1.11974	1.42374	1.72762	2.00751	2.29481	2.57279	2.80614	2.93839	3.17275	3.30238	3.41475	3.56413	3.62834	3.74672	3.84176	3.93316	4.03712	4.11691	4.18827	4.24378	4.28154	4.30996	4.30996	4.30996	4.30996	4.30996	4.30996	4.30996	4.30996	4.30996	4.30996	4.30996	4.30996	4.30996	4.30996	4.30996	4.30996	4.30996
631	-1.45458	-1.21852	-0.973121	-0.422125	0.751169	1.07266	1.25991	1.43958	1.60756	1.78162	1.96237	2.05525	2.20929	2.33171	2.44763	2.57393	2.83648	2.94592	3.101	3.206	3.31228	3.38315	3.40746	3.48113	3.53914	3.66614	3.73405	3.73405	3.73405	3.73405	3.73405	3.73405	3.73405	3.73405	3.73405	3.73405	3.73405	3.73405	3.73405	3.73405	3.73405
632	-1.16494	0.548128	0.904711	1.16565	1.44701	1.71717	1.90751	2.09629	2.25041	2.41866	2.57383	2.72645	2.85169	2.99081	3.09171	3.20426	3.28681	3.35955	3.42905	3.49641	3.53359	3.56287	3.61405	3.76551	3.77298	3.77298	3.77298	3.77298	3.77298	3.77298	3.77298	3.77298	3.77298	3.77298	3.77298	3.77298	3.77298	3.77298	3.77298	3.77298	3.77298
633	-1.33784	0.493873	0.940013	1.20825	1.48578	1.69334	1.89825	2.0443	2.24311	2.38456	2.50961	2.61666	2.73155	2.84095	2.91595	3.03682	3.10519	3.16385	3.20599	3.21417	3.25973	3.35105	3.45307	3.64429	3.79583	3.86211	3.93791	3.97052	4.02396	4.06662	4.06662	4.06662	4.06662	4.06662	4.06662	4.06662	4.06662	4.06662	4.06662	4.06662	4.06662
634	0.651643	1.0993	1.37045	1.62281	1.85966	2.01118	2.15825	2.41769	2.55899	2.82306	2.96447	3.03864	3.11934	3.18394	3.25354	3.34013	3.4027	3.45821	3.49431	3.53456	3.58515	3.6187	3.64205	3.72423	3.72423	3.72423	3.72423	3.72423	3.72423	3.72423	3.72423	3.72423	3.72423	3.72423	3.72423	3.72423	3.72423	3.72423	3.72423	3.72423	3.72423
635	-1.49245	-1.09006	-0.392405	0.111507	0.429646	0.691924	0.857518	1.08104	1.23747	1.46519	1.63045	1.82552	2.01092	2.16234	2.28047	2.42697	2.52532	2.68372	2.76401	2.82485	3.01095	3.10359	3.14295	3.27098	3.39888	3.51954	3.54715	3.57217	3.63658	3.65605	3.6823	3.76452	3.81391	3.81391	3.81391	3.81391	3.81391	3.81391	3.81391	3.81391	3.81391
636	-1.53612	-1.24822	-0.285679	0.246387	0.450712	0.645854	0.853548	1.03403	1.22721	1.41653	1.6601	1.82381	1.97354	2.10447	2.22754	2.36584	2.49249	2.68288	2.80681	2.90074	3.08534	3.20164	3.29386	3.41295	3.48746	3.59004	3.6742	3.72488	3.79041	3.81894	3.87389	4.04375	4.15068	4.17138	4.17138	4.17138	4.17138	4.17138	4.17138	4.17138	4.17138
637	-1.14791	-0.203168	0.777206	1.08601	1.30451	1.51885	1.70898	1.85228	1.97763	2.18836	2.32328	2.49377	2.66429	2.79553	2.92664	3.02327	3.09858	3.17469	3.29055	3.31674	3.40258	3.5168	3.66903	3.67773	3.7323	3.77151	3.86061	3.90239	3.94621	4.0196	4.0449	4.0449	4.0449	4.0449	4.0449	4.0449	4.0449	4.0449	4.0449	4.0449	4.0449
638	-1.64685	0.723915	0.933779	1.18065	1.3515	1.52016	1.6716	1.81752	1.96688	2.09849	2.23069	2.39484	2.55577	2.69528	2.80225	2.91532	2.99066	3.06024	3.13174	3.18479	3.33344	3.46511	3.58718	3.72519	3.75772	3.76452	3.82684	3.88707	3.88707	3.88707	3.88707	3.88707	3.88707	3.88707	3.88707	3.88707	3.88707	3.88707	3.88707	3.88707	3.88707
639	-1.55259	0.685103	1.00564	1.30311	1.55339	1.70906	1.88577	2.04109	2.21483	2.35921	2.47287	2.70301	2.81193	2.91096	3.01849	3.14267	3.21504	3.27371	3.32586	3.3377	3.37253	3.45283	3.47437	3.55587	3.56153	3.70077	3.8262	3.95161	3.95161	3.95161	3.95161	3.95161	3.95161	3.95161	3.95161	3.95161	3.95161	3.95161	3.95161	3.95161	3.95161
640	0.251431	0.689478	1.10895	1.32792	1.51078	1.64426	1.78837	1.905	2.18263	2.34518	2.45901	2.54422	2.60182	2.6604	2.70827	2.74865	2.82069	2.89344	2.96705	3.01817	3.20824	3.35082	3.38891	3.42155	3.42621	3.42649	3.47334	3.54096	3.64856	3.86748	3.98455	4.04675	4.10694	4.16965	4.16965	4.16965	4.16965	4.16965	4.16965	4.16965	4.16965
641	-1.2555	0.145065	0.503225	0.843126	1.09024	1.35918	1.61445	1.85519	2.03716	2.23704	2.41639	2.54276	2.84395	2.9258	2.99047	3.05547	3.11316	3.28595	3.44315	3.49058	3.53516	3.60728	3.64704	3.83215	3.87635	3.92011	3.93991	3.9705	3.9705	3.9705	3.9705	3.9705	3.9705	3.9705	3.9705	3.9705	3.9705	3.9705	3.9705	3.9705	3.9705
642	-0.303891	0.0214794	0.295998	0.511714	0.640553	0.76146	0.851318	0.976883	1.02647	1.09161	1.1189	1.19335	1.22586	1.30604	1.4222	1.45172	1.46249	1.4643	1.4643	1.4643	1.4643	1.4643	1.4643	1.4643	1.4643	1.4643	1.4643	1.4643	1.4643	1.4643	1.4643	1.4643	1.4643	1.4643	1.4643	1.4643	1.4643	1.4643	1.4643	1.4643	1.4643
643	-0.24598	1.00613	1.29911	1.54372	1.73077	1.96253	2.10108	2.23066	2.4152	2.51592	2.68346	2.91561	3.00732	3.21133	3.2969	3.35344	3.44316	3.51809	3.59575	3.65524	3.91966	3.99117	4.03814	4.0872	4.23148	4.27141	4.41833	4.41833	4.41833	4.41833	4.41833	4.41833	4.41833	4.41833	4.41833	4.41833	4.41833	4.41833	4.41833	4.41833	4.41833
644	-1.58199	-1.3608	0.571566	0.82951	1.03232	1.21201	1.3507	1.54626	1.67118	1.92994	2.1424	2.29466	2.41591	2.53395	2.61305	2.7308	2.91408	3.04387	3.13515	3.20508	3.29485	3.40516	3.53477	3.57705	3.58815	3.58815	3.58815	3.58815	3.58815	3.58815	3.58815	3.58815	3.58815	3.58815	3.58815	3.58815	3.58815	3.58815	3.58815	3.58815	3.58815
645	-0.675531	0.149634	0.43407	0.637088	0.801305	0.956477	1.3085	1.49537	1.77707	1.89957	2.02789	2.14777	2.24163	2.31196	2.39692	2.48576	2.59962	2.66084	2.71141	2.94373	2.97336	3.05839	3.08377	3.19204	3.38883	3.45374	3.46233	3.5329	3.70083	3.7178	3.77799	3.77799	3.77799	3.77799	3.77799	3.77799	3.77799	3.77799	3.77799	3.77799	3.77799
646	-0.886413	0.250842	0.632516	0.913989	1.13615	1.40797	1.52281	1.97384	2.13476	2.32211	2.47836	2.66717	2.79642	2.91094	3.04198	3.1431	3.26906	3.36561	3.40826	3.49758	3.58435	3.60195	3.79849	3.84216	3.99608	3.99744	4.00293	4.00293	4.00293	4.00293	4.00293	4.00293	4.00293	4.00293	4.00293	4.00293	4.00293	4.00293	4.00293	4.00293	4.00293
647	-0.0856245	0.929532	1.13957	1.34527	1.53703	1.73405	1.91821	2.08796	2.325	2.44061	2.52472	2.68245	2.81561	2.9323	3.05339	3.16116	3.22171	3.31262	3.45439	3.54369	3.81636	3.85484	3.89302	3.92316	3.92711	4.06338	4.06338	4.06338	4.06338	4.06338	4.06338	4.06338	4.06338	4.06338	4.06338	4.06338	4.06338	4.06338	4.06338	4.06338	4.06338
648	-1.06381	0.870099	1.18435	1.42692	1.65184	1.84422	2.01391	2.14425	2.27506	2.43068	2.56931	2.64789	2.71992	2.8411	2.93907	3.02447	3.14073	3.22318	3.26328	3.3205	3.35528	3.38313	3.46892	3.52924	3.55766	3.5606	3.5606	3.5606	3.5606	3.5606	3.5606	3.5606	3.5606	3.5606	3.5606	3.5606	3.5606	3.5606	3.5606	3.5606	3.5606
649	-0.207481	0.432447	0.670507	0.883735	1.06965	1.28994	1.48728	1.62196	1.82328	1.97435	2.0825	2.21751	2.30219	2.38756	2.5523	2.67347	2.75562	2.85594	2.91834	2.97743	3.01436	3.03192	3.078	3.09204	3.20172	3.27222	3.28952	3.36893	3.45344	3.4914	3.55791	3.7218	3.7218	3.7218	3.7218	3.7218	3.7218	3.7218	3.7218	3.7218	3.7218
650	0.29846	0.670597	0.957478	1.14096	1.2975	1.48073	1.63553	1.84852	2.13553	2.382	2.60844	2.72146	2.80655	2.96054	3.10527	3.20223	3.27119	3.35104	3.40144	3.44092	3.59841	3.66056	3.70079	3.72394	3.72832	3.83971	3.85042	3.85042	3.85042	3.85042	3.85042	3.85042	3.85042	3.85042	3.85042	3.85042	3.85042	3.85042	3.85042	3.85042	3.85042
651	0.384254	0.560849	0.699075	0.831567	0.973099	1.12629	1.27783	1.57969	1.70268	1.84177	1.9658	2.12783	2.20227	2.34509	2.62475	2.82474	3.01521	3.15894	3.29865	3.39469	3.45786	3.5982	3.73514	3.80254	3.80254	3.80254	3.80254	3.80254	3.80254	3.80254	3.80254	3.80254	3.80254	3.80254	3.80254	3.80254	3.80254	3.80254	3.80254	3.80254	3.80254
652	-1.48745	-0.237355	0.326713	0.634739	0.957539	1.24271	1.58897	1.84124	2.05191	2.21734	2.3908	2.6133	2.77125	2.91066	3.05032	3.18977	3.31507	3.38827	3.47915	3.57126	3.63968	3.65667	3.68702	3.7341	3.74048	3.74966	3.77042	3.77042	3.77042	3.77042	3.77042	3.77042	3.77042	3.77042	3.77042	3.77042	3.77042	3.77042	3.77042	3.77042	3.77042
653	-0.632274	-0.272903	0.224761	0.455644	0.670841	0.849052	1.01355	1.15407	1.26421	1.4755	1.70249	1.86709	1.97233	2.07135	2.14579	2.21021	2.31918	2.42884	2.57782	2.77057	2.95544	3.04878	3.17688	3.30563	3.40486	3.47015	3.6009	3.70882	3.70882	3.70882	3.70882	3.70882	3.70882	3.70882	3.70882	3.70882	3.70882	3.70882	3.70882	3.70882	3.70882
654	-1.797	-1.3966	-1.31395	-0.860539	-0.591812	-0.403726	-0.237648	0.404905	0.950892	1.19029	1.41189	1.539	1.66205	1.76082	1.86434	1.95821	2.04707	2.08177	2.13022	2.20298	2.37665	2.39858	2.45678	2.63143	2.79196	3.00735	3.25293	3.33118	3.3512	3.42823	3.47031	3.47031	3.47031	3.47031	3.47031	3.47031	3.47031	3.47031	3.47031	3.47031	3.47031
655	-0.482703	0.429199	0.925325	1.24769	1.54934	1.80847	2.05376	2.24376	2.42166	2.58442	2.83638	2.95301	3.0582	3.14118	3.2465	3.34311	3.44481	3.52264	3.61323	3.71884	3.80894	3.87814	3.92045	4.0144	4.02016	4.04583	4.15411	4.22361	4.31412	4.31412	4.31412	4.31412	4.31412	4.31412	4.31412	4.31412	4.31412	4.31412	4.31412	4.31412	4.31412
656	-1.49419	-0.0797676	0.386666	0.713754	0.953301	1.17711	1.39809	1.61735	1.82663	2.01895	2.17629	2.38658	2.52353	2.65887	2.78509	2.92544	3.01881	3.154	3.25261	3.37467	3.43907	3.553	3.60872	3.70638	3.74613	4.11346	4.15224	4.16338	4.16338	4.16338	4.16338	4.16338	4.16338	4.16338	4.16338	4.16338	4.16338	4.16338	4.16338	4.16338	4.16338
657	-1.38577	-1.06847	0.526103	0.997287	1.25499	1.5035	1.70957	1.88445	2.16012	2.41112	2.53776	2.7377	2.90989	3.04775	3.16565	3.30239	3.42017	3.56546	3.65882	3.85104	3.94213	4.04721	4.1658	4.19758	4.21479	4.32634	4.39843	4.40045	4.40045	4.40045	4.40045	4.40045	4.40045	4.40045	4.40045	4.40045	4.40045	4.40045	4.40045	4.40045	4.40045
658	-0.334545	0.161449	0.493208	0.778814	1.09733	1.30079	1.47584	1.65578	1.82091	2.0235	2.17587	2.32376	2.47399	2.65498	2.80485	2.95434	3.08411	3.1959	3.29774	3.40363	3.5075	3.59604	3.67183	3.703	3.75768	3.85023	3.86209	3.96857	3.97144	3.99107	4.02063	4.02966	4.03532	4.08159	4.09939	4.09939	4.09939	4.09939	4.09939	4.09939	4.09939
659	-0.408869	0.105171	0.492593	0.710449	0.914242	1.11513	1.27813	1.49412	1.64237	1.94141	2.08019	2.19429	2.27425	2.39779	2.55447	2.6977	2.96417	3.06025	3.1548	3.23637	3.26183	3.30849	3.4052	3.58404	3.61597	3.68944	3.72739	3.81025	3.81442	3.81442	3.81442	3.81442	3.81442	3.81442	3.81442	3.81442	3.81442	3.81442	3.81442	3.81442	3.81442
660	-1.40845	0.358029	0.773945	1.13612	1.44174	1.72585	1.98032	2.18734	2.39047	2.56942	2.73788	2.83428	2.973	3.06243	3.17674	3.28507	3.38957	3.56406	3.65929	3.71345	3.90595	3.94316	3.95892	3.96936	3.96936	3.96936	3.96936	3.96936	3.96936	3.96936	3.96936	3.96936	3.96936	3.96936	3.96936	3.96936	3.96936	3.96936	3.96936	3.96936	3.96936
661	0.380639	0.796873	1.04806	1.24292	1.57525	1.78528	1.97285	2.19582	2.36049	2.59675	2.72573	2.83216	2.93268	3.07209	3.38648	3.48681	3.61697	3.70577	3.85153	3.92157	4.02142	4.11505	4.20158	4.20158	4.20158	4.20158	4.20158	4.20158	4.20158	4.20158	4.20158	4.20158	4.20158	4.20158	4.20158	4.20158	4.20158	4.20158	4.20158	4.20158	4.20158
662	0.410392	0.739872	1.1216	1.23835	1.3327	1.44696	1.59035	1.778	1.9739	2.12797	2.24822	2.33311	2.45559	2.5508	2.64284	2.7352	2.91847	2.94892	2.97727	3.03357	3.21944	3.24953	3.57897	3.59983	3.69087	3.75906	3.79893	3.92368	4.0098	4.02089	4.02089	4.02089	4.02089	4.02089	4.02089	4.02089	4.02089	4.02089	4.02089	4.02089	4.02089
663	0.73013	1.0453	1.34003	1.56923	1.77039	1.93669	2.14195	2.3031	2.46972	2.61204	2.76985	2.98472	3.12729	3.26021	3.32493	3.38671	3.48416	3.59903	3.68604	3.75519	3.79647	3.82065	3.82633	3.8475	3.87264	3.87772	3.93684	3.94296	3.94296	3.94296	3.94296	3.94296	3.94296	3.94296	3.94296	3.94296	3.94296	3.94296	3.94296	3.94296	3.94296
664	0.392832	0.89168	1.164	1.37468	1.57417	1.74557	1.91714	2.06701	2.21264	2.44462	2.55788	2.71264	2.89161	2.99246	3.0892	3.15469	3.31699	3.41348	3.49774	3.61792	3.73718	3.77225	3.81001	3.82462	3.87098	3.88442	3.90759	4.01851	4.1286	4.1621	4.21199	4.22782	4.27654	4.29016	4.302	4.31406	4.31406	4.31406	4.31406	4.31406	4.31406
665	-1.5017	-1.2131	0.468051	0.72839	0.972218	1.16475	1.41501	1.61808	1.79279	1.96382	2.12227	2.27253	2.41567	2.66253	2.82225	2.97077	3.14123	3.22685	3.28428	3.34409	3.42203	3.48922	3.5187	3.54209	3.54209	3.54209	3.54209	3.54209	3.54209	3.54209	3.54209	3.54209	3.54209	3.54209	3.54209	3.54209	3.54209	3.54209	3.54209	3.54209	3.54209
666	0.177402	0.617354	0.915593	1.07622	1.22705	1.45203	1.64607	1.75946	1.88396	2.01669	2.13463	2.24661	2.35804	2.47506	2.59315	2.7047	2.91801	3.05508	3.16365	3.22544	3.38072	3.58682	3.61983	3.63997	3.70672	3.72399	3.74214	3.74214	3.74214	3.74214	3.74214	3.74214	3.74214	3.74214	3.74214	3.74214	3.74214	3.74214	3.74214	3.74214	3.74214
667	0.544179	0.94284	1.16052	1.34603	1.52582	1.67967	1.83199	2.02916	2.20318	2.39858	2.55059	2.66232	2.80347	2.91753	3.01515	3.10713	3.2517	3.3479	3.41965	3.48729	3.53983	3.59182	3.69814	3.81357	3.86397	3.95729	4.00309	4.00309	4.00309	4.00309	4.00309	4.00309	4.00309	4.00309	4.00309	4.00309	4.00309	4.00309	4.00309	4.00309	4.00309
668	-0.983793	1.20632	1.58858	1.93262	2.14218	2.32825	2.4823	2.63735	2.79557	2.94669	3.12239	3.23316	3.33072	3.48178	3.55564	3.71992	3.72946	3.72946	3.72946	3.72946	3.72946	3.72946	3.72946	3.72946	3.72946	3.72946	3.72946	3.72946	3.72946	3.72946	3.72946	3.72946	3.72946	3.72946	3.72946	3.72946	3.72946	3.72946	3.72946	3.72946	3.72946
669	-0.854531	-0.185743	0.44095	0.67255	0.901941	1.12668	1.37138	1.58393	1.75975	1.93394	2.07731	2.18764	2.29572	2.43508	2.56275	2.66994	2.89114	3.0696	3.211	3.34929	3.4328	3.52302	3.6145	3.68206	3.70851	3.79273	3.81992	3.83074	3.88326	3.9046	3.93371	3.94734	4.05774	4.06669	4.07151	4.13833	4.15644	4.16003	4.23467	4.23467	4.23467
670	-0.33759	0.186802	0.466375	0.715605	1.00467	1.26493	1.52111	1.68568	1.87412	2.01126	2.14279	2.25096	2.40388	2.58656	2.79105	2.88186	3.00942	3.14323	3.22886	3.34981	3.41902	3.53634	3.5914	3.65401	3.70874	3.7097	3.7097	3.7097	3.7097	3.7097	3.7097	3.7097	3.7097	3.7097	3.7097	3.7097	3.7097	3.7097	3.7097	3.7097	3.7097
671	-1.39767	-0.337934	0.412232	0.80578	1.05997	1.29739	1.51048	1.69386	1.83083	1.97067	2.11637	2.2436	2.40509	2.57517	2.72862	2.92056	3.01219	3.0975	3.28834	3.37389	3.52758	3.60479	3.65343	3.80992	3.82383	3.86399	3.87132	3.87132	3.87132	3.87132	3.87132	3.87132	3.87132	3.87132	3.87132	3.87132	3.87132	3.87132	3.87132	3.87132	3.87132
672	0.307168	0.837965	1.00856	1.17483	1.30779	1.41611	1.63845	1.8469	2.00842	2.10059	2.19407	2.33594	2.4615	2.54036	2.60968	2.69937	2.79577	3.00998	3.20622	3.35425	3.63239	3.82127	3.95479	4.00513	4.13485	4.20544	4.24751	4.27024	4.27024	4.27024	4.27024	4.27024	4.27024	4.27024	4.27024	4.27024	4.27024	4.27024	4.27024	4.27024	4.27024
673	0.0102519	0.424521	0.781821	1.09528	1.50579	1.7123	1.95202	2.12671	2.29577	2.47362	2.64322	2.78043	2.98776	3.17024	3.28935	3.36462	3.52362	3.68301	3.72851	3.79869	3.85729	3.88549	3.89862	3.89862	3.89862	3.89862	3.89862	3.89862	3.89862	3.89862	3.89862	3.89862	3.89862	3.89862	3.89862	3.89862	3.89862	3.89862	3.89862	3.89862	3.89862
674	0.450586	0.723395	0.987712	1.2254	1.43662	1.57063	1.71103	1.82195	1.91195	2.00238	2.10982	2.26342	2.41214	2.57559	2.67755	2.76883	2.88219	2.96562	3.03227	3.20124	3.3846	3.49474	3.56772	3.58557	3.64642	3.65191	3.6688	3.6793	3.78946	3.91548	3.91548	3.91548	3.91548	3.91548	3.91548	3.91548	3.91548	3.91548	3.91548	3.91548	3.91548
675	-1.24131	0.190122	0.496024	0.833722	1.15519	1.48046	1.6762	1.85662	2.0283	2.1958	2.32576	2.42134	2.52617	2.63987	2.72737	2.84491	2.91466	3.04365	3.17612	3.41286	3.58663	3.79036	3.87253	3.95846	4.01699	4.04025	4.07646	4.10689	4.1122	4.1153	4.13515	4.13515	4.13515	4.13515	4.13515	4.13515	4.13515	4.13515	4.13515	4.13515	4.13515
676	-1.48113	-1.02695	-0.652461	-0.279322	0.133825	0.363375	0.572207	0.757358	0.976665	1.17489	1.40275	1.5665	1.72899	1.85203	1.96029	2.06614	2.15602	2.25125	2.35662	2.47007	2.55786	2.69753	2.92695	3.04609	3.12595	3.20776	3.379	3.46037	3.51237	3.63282	3.66731	3.82319	3.8352	3.88142	3.90389	3.91482	3.91482	3.91482	3.91482	3.91482	3.91482
677	-1.45639	-0.0566697	0.617362	0.933221	1.24298	1.56618	1.82818	2.02643	2.20678	2.35518	2.52101	2.68343	2.81394	2.92547	3.04277	3.15313	3.2467	3.31986	3.36503	3.42258	3.49523	3.59098	3.60991	3.61489	3.65919	3.68959	3.71515	3.74029	3.76998	3.78099	3.79365	3.79365	3.79365	3.79365	3.79365	3.79365	3.79365	3.79365	3.79365	3.79365	3.79365
678	-1.42751	-0.755474	0.0821066	0.484846	0.773031	1.01179	1.21354	1.49356	1.71537	1.90048	2.06813	2.22046	2.51792	2.64081	2.78295	2.8898	3.00776	3.06513	3.16739	3.28585	3.34077	3.42497	3.58274	3.67727	3.72474	3.72474	3.72474	3.72474	3.72474	3.72474	3.72474	3.72474	3.72474	3.72474	3.72474	3.72474	3.72474	3.72474	3.72474	3.72474	3.72474
679	-0.94939	0.426471	0.846949	1.05431	1.26576	1.45644	1.61342	1.77562	1.98255	2.11006	2.32053	2.45028	2.57716	2.70747	2.83541	3.04394	3.18552	3.31202	3.37433	3.48538	3.6141	3.65716	3.73008	3.82228	3.89128	3.96905	3.97051	3.97051	3.97051	3.97051	3.97051	3.97051	3.97051	3.97051	3.97051	3.97051	3.97051	3.97051	3.97051	3.97051	3.97051
680	-1.1338	-0.835593	-0.100128	0.325512	0.602556	0.887407	1.14343	1.31077	1.4583	1.61582	1.77188	1.95311	2.08051	2.2079	2.32107	2.46323	2.55955	2.6332	2.72463	2.84368	2.92224	3.14883	3.22584	3.26889	3.38577	3.55018	3.67152	3.70883	3.74525	3.76452	3.81209	3.81209	3.81209	3.81209	3.81209	3.81209	3.81209	3.81209	3.81209	3.81209	3.81209
681	0.634646	0.95582	1.2439	1.5211	1.74025	2.00016	2.27819	2.42054	2.54549	2.67847	2.7959	2.90609	3.13107	3.25685	3.42689	3.55223	3.62644	3.70526	3.76467	3.81679	3.85831	3.90563	3.94553	3.97515	3.97515	3.97515	3.97515	3.97515	3.97515	3.97515	3.97515	3.97515	3.97515	3.97515	3.97515	3.97515	3.97515	3.97515	3.97515	3.97515	3.97515
682	-0.991034	0.0351282	0.641043	0.974597	1.20876	1.35827	1.62378	1.75534	1.95489	2.36113	2.53823	2.66509	2.76678	2.83773	2.9175	2.97776	3.14968	3.27981	3.38618	3.51754	3.61973	3.68666	3.7332	3.78865	3.89316	3.89316	3.89316	3.89316	3.89316	3.89316	3.89316	3.89316	3.89316	3.89316	3.89316	3.89316	3.89316	3.89316	3.89316	3.89316	3.89316
683	0.639644	0.933684	1.26961	1.58824	1.81308	1.99253	2.21785	2.37559	2.56886	2.7378	2.90065	3.04835	3.16028	3.28473	3.37487	3.45874	3.54815	3.58827	3.68662	3.82785	3.8831	3.9821	4.04287	4.11768	4.172	4.18808	4.18808	4.18808	4.18808	4.18808	4.18808	4.18808	4.18808	4.18808	4.18808	4.18808	4.18808	4.18808	4.18808	4.18808	4.18808
684	-1.30546	-0.188825	0.806624	1.09481	1.33235	1.55987	1.80369	2.15053	2.37524	2.55335	2.70568	2.78912	2.94187	3.09295	3.2258	3.29255	3.35565	3.40111	3.59064	3.71612	3.77688	3.85294	3.87455	3.98982	4.06806	4.10158	4.10158	4.10158	4.10158	4.10158	4.10158	4.10158	4.10158	4.10158	4.10158	4.10158	4.10158	4.10158	4.10158	4.10158	4.10158
685	-1.44337	0.185759	0.582947	0.811652	1.01296	1.17096	1.32163	1.44505	1.58007	1.69653	1.79711	1.87686	2.03439	2.09842	2.16157	2.28602	2.3428	2.43509	2.54262	2.73618	2.91407	3.09128	3.37198	3.4893	3.55147	3.66458	3.68429	3.7183	3.90768	3.91182	3.926	3.93597	3.93597	3.93597	3.93597	3.93597	3.93597	3.93597	3.93597	3.93597	3.93597
686	-1.44474	-0.00911105	0.64372	1.00059	1.42208	1.68384	1.87093	2.09086	2.25102	2.44358	2.66891	2.87286	2.98774	3.08018	3.14776	3.32544	3.5788	3.63952	3.73168	3.84864	3.97066	4.04507	4.08738	4.09117	4.09117	4.09117	4.09117	4.09117	4.09117	4.09117	4.09117	4.09117	4.09117	4.09117	4.09117	4.09117	4.09117	4.09117	4.09117	4.09117	4.09117
687	0.532155	0.833547	1.10176	1.33281	1.55971	1.72988	1.88077	2.05299	2.23197	2.38732	2.56182	2.70788	2.81676	2.91237	3.00447	3.06014	3.09333	3.09333	3.09333	3.09333	3.09333	3.09333	3.09333	3.09333	3.09333	3.09333	3.09333	3.09333	3.09333	3.09333	3.09333	3.09333	3.09333	3.09333	3.09333	3.09333	3.09333	3.09333	3.09333	3.09333	3.09333
688	-1.10904	-0.282964	0.193422	0.549791	0.767212	0.979519	1.22926	1.399	1.56203	1.73366	1.90508	2.10416	2.26381	2.50684	2.62655	2.73503	2.84152	2.92996	3.13177	3.21001	3.29979	3.39351	3.46188	3.52711	3.56639	3.66453	3.70728	3.74462	3.76714	3.76714	3.76714	3.76714	3.76714	3.76714	3.76714	3.76714	3.76714	3.76714	3.76714	3.76714	3.76714
689	0.414124	0.60135	0.77653	1.04939	1.24309	1.43944	1.60729	1.76927	1.92069	2.10583	2.28898	2.42448	2.58869	2.73003	2.80309	2.92752	3.03005	3.1921	3.326	3.42189	3.53229	3.67305	3.76203	3.82055	3.90226	3.95211	3.99772	4.0577	4.07217	4.18252	4.23111	4.29283	4.40766	4.40766	4.40766	4.40766	4.40766	4.40766	4.40766	4.40766	4.40766
690	-0.354654	0.241536	0.596165	0.849032	0.989546	1.1251	1.20224	1.36027	1.48614	1.56555	1.7056	1.78753	1.89205	1.98284	2.05536	2.2368	2.38053	2.47345	2.52652	2.59823	2.7351	2.88839	2.95338	3.11585	3.21763	3.36509	3.4867	3.62357	3.65368	3.65368	3.65368	3.65368	3.65368	3.65368	3.65368	3.65368	3.65368	3.65368	3.65368	3.65368	3.65368
691	1.17927	1.58459	1.92183	2.09516	2.38915	2.54067	2.69654	2.85274	2.95139	3.01353	3.05779	3.22514	3.27698	3.31724	3.47217	3.53748	3.62288	3.66131	3.77784	3.92474	4.01611	4.01611	4.01611	4.01611	4.01611	4.01611	4.01611	4.01611	4.01611	4.01611	4.01611	4.01611	4.01611	4.01611	4.01611	4.01611	4.01611	4.01611	4.01611	4.01611	4.01611
692	-1.033	0.513229	0.906812	1.23374	1.52155	1.69458	1.8721	2.06831	2.2404	2.40598	2.56582	2.72648	2.87196	3.00521	3.16761	3.27995	3.47711	3.69898	3.8428	3.94349	4.01387	4.0878	4.15152	4.21945	4.234	4.234	4.234	4.234	4.234	4.234	4.234	4.234	4.234	4.234	4.234	4.234	4.234	4.234	4.234	4.234	4.234
693	0.800473	1.03532	1.24723	1.48392	1.67066	1.84304	2.07603	2.29701	2.49932	2.63851	2.723	2.80522	2.87522	3.0969	3.19763	3.24865	3.28112	3.30441	3.31634	3.35637	3.3593	3.37228	3.40731	3.41878	3.45149	3.50205	3.60579	3.68705	3.71525	3.82945	3.87501	3.87588	3.88342	3.89517	3.89517	3.89517	3.89517	3.89517	3.89517	3.89517	3.89517
694	-0.612057	0.169363	0.483371	0.663224	0.951422	1.20911	1.47237	1.69847	1.85417	2.00511	2.13959	2.30176	2.43684	2.61967	2.68704	2.77883	2.84555	2.95681	2.99378	3.06209	3.11565	3.20012	3.23759	3.30288	3.30294	3.30937	3.35154	3.35154	3.35154	3.35154	3.35154	3.35154	3.35154	3.35154	3.35154	3.35154	3.35154	3.35154	3.35154	3.35154	3.35154
695	0.311087	0.694993	0.914631	1.13492	1.39382	1.55671	1.73893	1.9116	2.07585	2.31194	2.4565	2.64529	2.79979	2.93077	3.09158	3.20563	3.31923	3.37289	3.39996	3.41605	3.41819	3.51848	3.59403	3.59403	3.59403	3.59403	3.59403	3.59403	3.59403	3.59403	3.59403	3.59403	3.59403	3.59403	3.59403	3.59403	3.59403	3.59403	3.59403	3.59403	3.59403
696	-1.26168	-0.340643	0.646135	1.00985	1.21732	1.41777	1.64014	1.88316	2.03536	2.18672	2.32211	2.45785	2.59932	2.72869	2.86128	2.95262	3.00918	3.08053	3.13267	3.24382	3.37947	3.61398	3.68956	3.86021	4.0733	4.23125	4.31774	4.33524	4.35301	4.36698	4.36698	4.36698	4.36698	4.36698	4.36698	4.36698	4.36698	4.36698	4.36698	4.36698	4.36698
697	-1.21342	-0.405936	0.275456	0.642232	0.99535	1.32829	1.60265	1.87417	2.07383	2.24835	2.41079	2.57799	2.69424	2.82189	2.9838	3.12482	3.28751	3.42618	3.5836	3.70218	3.87165	4.14041	4.18654	4.18654	4.18654	4.18654	4.18654	4.18654	4.18654	4.18654	4.18654	4.18654	4.18654	4.18654	4.18654	4.18654	4.18654	4.18654	4.18654	4.18654	4.18654
698	-1.33886	1.02048	1.27984	1.50884	1.69961	1.84793	1.96185	2.28339	2.39618	2.49118	2.57912	2.6747	2.75897	2.84209	2.9906	3.03443	3.0894	3.23899	3.2793	3.29595	3.35575	3.47424	3.5826	3.65735	3.74626	3.81663	3.87537	3.9055	3.9055	3.9055	3.9055	3.9055	3.9055	3.9055	3.9055	3.9055	3.9055	3.9055	3.9055	3.9055	3.9055
699	-0.297932	0.284788	0.652162	0.838987	0.991029	1.14644	1.2855	1.49412	1.67714	1.81844	1.96052	2.08185	2.21599	2.33413	2.45313	2.54291	2.65135	2.73749	2.82255	3.02629	3.18117	3.2953	3.3451	3.51912	3.62918	3.68383	3.72951	3.78507	3.89966	3.95987	3.97643	3.98872	4.00172	4.14244	4.1476	4.22288	4.24387	4.25518	4.25518	4.25518	4.25518
700	0.700556	1.04046	1.23341	1.41824	1.65795	1.86798	2.04036	2.21347	2.33034	2.42764	2.51692	2.60749	2.68485	2.79029	2.85562	2.94901	3.03564	3.10309	3.10791	3.15556	3.17395	3.21511	3.28228	3.28947	3.36364	3.55175	3.55197	3.60223	3.64017	3.68367	3.68367	3.68367	3.68367	3.68367	3.68367	3.68367	3.68367	3.68367	3.68367	3.68367	3.68367
701	-0.763464	0.607708	0.97157	1.25444	1.51298	1.71111	1.9245	2.06902	2.20337	2.34829	2.54144	2.67826	2.79172	2.94678	3.04235	3.13033	3.19553	3.37741	3.45522	3.50602	3.54894	3.62108	3.6497	3.65822	3.66862	3.77294	3.87128	3.94804	3.96433	3.97893	3.97893	3.97893	3.97893	3.97893	3.97893	3.97893	3.97893	3.97893	3.97893	3.97893	3.97893
702	0.138046	0.5044	0.753904	0.980069	1.18828	1.37447	1.52138	1.6672	1.77315	1.99923	2.16421	2.34265	2.43937	2.51202	2.59157	2.77162	2.9588	3.02054	3.19039	3.28525	3.49878	3.54552	3.60024	3.60849	3.66921	3.69494	3.732	3.74664	3.96865	3.96865	3.96865	3.96865	3.96865	3.96865	3.96865	3.96865	3.96865	3.96865	3.96865	3.96865	3.96865
703	-1.53108	0.66755	1.04385	1.28007	1.50779	1.74219	1.89674	2.04073	2.16558	2.29326	2.41472	2.52068	2.70572	2.95609	3.16242	3.26629	3.37174	3.50024	3.59025	3.64357	3.69873	3.71408	3.83822	3.95249	4.14843	4.14843	4.14843	4.14843	4.14843	4.14843	4.14843	4.14843	4.14843	4.14843	4.14843	4.14843	4.14843	4.14843	4.14843	4.14843	4.14843
704	0.73013	1.0453	1.34003	1.56923	1.77039	1.93669	2.14195	2.3031	2.46972	2.61204	2.76985	2.98472	3.12729	3.26021	3.32493	3.38671	3.48416	3.59903	3.68604	3.75519	3.79647	3.82065	3.82633	3.8475	3.87264	3.87772	3.93684	3.94296	3.94296	3.94296	3.94296	3.94296	3.94296	3.94296	3.94296	3.94296	3.94296	3.94296	3.94296	3.94296	3.94296
705	-1.2966	-0.0338565	0.309156	0.613366	0.846117	1.05877	1.245	1.42477	1.63658	1.79947	2.15649	2.27637	2.37667	2.46397	2.536	2.65163	2.74299	2.91232	3.2013	3.2795	3.50128	3.55287	3.58865	3.64631	3.6966	3.70738	3.70738	3.70738	3.70738	3.70738	3.70738	3.70738	3.70738	3.70738	3.70738	3.70738	3.70738	3.70738	3.70738	3.70738	3.70738
706	0.00642329	0.570609	0.895941	1.15365	1.33842	1.49799	1.65424	1.80491	1.96717	2.11947	2.25892	2.39679	2.51136	2.72878	2.8068	2.89928	2.99949	3.08386	3.2148	3.35903	3.42872	3.47678	3.55785	3.66769	3.71048	3.71338	3.73059	3.76546	3.78354	3.80041	3.8272	3.83445	3.8926	3.8926	3.8926	3.8926	3.8926	3.8926	3.8926	3.8926	3.8926
707	-1.35916	-0.671189	-0.146905	0.26038	0.594155	0.828322	1.04837	1.23508	1.46964	1.67482	1.88351	2.07803	2.30515	2.49273	2.61514	2.721	2.87223	3.06771	3.16305	3.20146	3.29812	3.35242	3.51311	3.64303	3.71262	3.73669	3.85021	3.96705	3.97579	3.98241	3.98241	3.98241	3.98241	3.98241	3.98241	3.98241	3.98241	3.98241	3.98241	3.98241	3.98241
708	-1.02994	0.651915	0.816559	1.04735	1.17886	1.31189	1.43032	1.54139	1.66295	1.76199	1.90567	1.99099	2.08758	2.19779	2.29841	2.37016	2.43726	2.53543	2.61689	2.80687	2.98652	3.12678	3.18808	3.26015	3.38479	3.42308	3.48578	3.51247	3.62775	3.66194	3.66194	3.66194	3.66194	3.66194	3.66194	3.66194	3.66194	3.66194	3.66194	3.66194	3.66194
709	0.550102	0.743868	0.897409	1.10844	1.30057	1.47916	1.63228	1.83966	2.05208	2.2469	2.62391	2.75839	2.86728	2.98745	3.05314	3.12527	3.1916	3.40626	3.47583	3.50036	3.58051	3.64152	3.75071	3.76807	3.79018	3.80241	3.88316	3.90256	3.90981	3.91888	3.91888	3.91888	3.91888	3.91888	3.91888	3.91888	3.91888	3.91888	3.91888	3.91888	3.91888
710	-1.21976	0.615622	0.847167	0.968514	1.17597	1.36273	1.51084	1.67476	1.8207	1.95357	2.07649	2.18412	2.27623	2.718	2.79226	2.96449	3.02751	3.1551	3.21458	3.28247	3.37826	3.44469	3.48469	3.63127	3.77358	3.81372	3.81871	3.81871	3.81871	3.81871	3.81871	3.81871	3.81871	3.81871	3.81871	3.81871	3.81871	3.81871	3.81871	3.81871	3.81871
711	-1.29462	0.695693	0.938621	1.219	1.4089	1.59197	1.83098	2.02703	2.2162	2.38996	2.5692	2.69809	2.87907	3.01081	3.13874	3.24261	3.32798	3.39691	3.58736	3.6169	3.636	3.6948	3.74345	3.77759	3.81556	3.82774	3.83688	3.83688	3.83688	3.83688	3.83688	3.83688	3.83688	3.83688	3.83688	3.83688	3.83688	3.83688	3.83688	3.83688	3.83688
712	-1.30767	-0.268182	0.290409	0.5364	0.725154	0.913626	1.07437	1.19932	1.31427	1.41021	1.56466	1.69391	1.91107	2.04116	2.29452	2.4492	2.57542	2.66789	2.80687	2.92285	3.02419	3.08217	3.21127	3.24572	3.27099	3.33696	3.37626	3.50868	3.58554	3.69106	3.72671	3.73889	3.76636	3.7895	3.82271	3.86945	3.9397	4.01471	4.0594	4.18763	4.20912
713	-1.77415	-1.0102	-0.513303	0.173398	0.8713	1.1571	1.44203	1.67079	1.84161	1.98686	2.22191	2.32728	2.51449	2.75451	2.93058	3.07029	3.1891	3.34439	3.47353	3.55786	3.64317	3.80968	3.94744	4.09087	4.13639	4.1673	4.19413	4.19413	4.19413	4.19413	4.19413	4.19413	4.19413	4.19413	4.19413	4.19413	4.19413	4.19413	4.19413	4.19413	4.19413
714	-1.30475	0.277119	0.638025	1.05429	1.27838	1.44266	1.59439	1.85025	2.25732	2.43047	2.55473	2.68688	2.76981	2.88299	2.96996	3.00929	3.17618	3.20007	3.22512	3.30256	3.33476	3.33837	3.45065	3.51631	3.62368	3.65714	3.71883	3.81902	3.87764	3.87764	3.87764	3.87764	3.87764	3.87764	3.87764	3.87764	3.87764	3.87764	3.87764	3.87764	3.87764
715	-1.45994	0.340783	0.565613	0.785104	0.981375	1.15854	1.35637	1.5343	1.70376	1.84811	2.14639	2.2765	2.47137	2.6576	2.82467	2.95863	3.0659	3.1541	3.25963	3.32608	3.41113	3.45627	3.54928	3.56074	3.64557	3.73445	3.83535	3.89205	3.91861	3.93519	3.97218	3.97218	3.97218	3.97218	3.97218	3.97218	3.97218	3.97218	3.97218	3.97218	3.97218
716	0.92091	1.25814	1.53464	1.82335	2.04566	2.1931	2.33893	2.48995	2.60883	2.6787	2.76831	2.90223	2.98028	3.08731	3.18796	3.22986	3.29099	3.42364	3.4777	3.59299	3.59572	3.61767	3.61767	3.61767	3.61767	3.61767	3.61767	3.61767	3.61767	3.61767	3.61767	3.61767	3.61767	3.61767	3.61767	3.61767	3.61767	3.61767	3.61767	3.61767	3.61767
717	-0.9848	0.293492	0.817966	1.08919	1.31895	1.53916	1.67494	1.80521	2.01905	2.13217	2.29265	2.39471	2.54233	2.67519	2.84544	2.93726	3.01359	3.1654	3.29512	3.40464	3.49421	3.50353	3.54368	3.5895	3.66229	3.75818	3.90416	3.98414	4.0236	4.06088	4.06791	4.06948	4.09837	4.09837	4.09837	4.09837	4.09837	4.09837	4.09837	4.09837	4.09837
718	-1.15322	-0.186686	0.225993	0.582339	0.817203	1.10774	1.32464	1.52654	1.81166	2.00348	2.14003	2.26016	2.43053	2.52824	2.65997	2.75244	2.84001	2.92127	3.07999	3.207	3.35211	3.51692	3.59638	3.64797	3.76378	3.81657	3.85775	3.92199	3.94949	3.98335	4.05213	4.06205	4.09013	4.0917	4.17398	4.31763	4.31763	4.31763	4.31763	4.31763	4.31763
719	-1.43925	-0.705845	0.779741	1.0154	1.29621	1.50729	2.00056	2.16731	2.43638	2.55074	2.65677	2.7422	2.80767	2.87401	2.91501	3.02422	3.07331	3.10458	3.17093	3.37754	3.41941	3.44861	3.51813	3.57751	3.60512	3.65077	3.6774	3.73168	3.7483	3.7965	3.8922	3.91695	3.91926	3.91926	3.91926	3.91926	3.91926	3.91926	3.91926	3.91926	3.91926
720	-1.45505	0.632635	0.884248	1.08121	1.30377	1.47104	1.62595	1.77522	1.97603	2.14824	2.29009	2.42249	2.62881	2.763	2.90374	2.99575	3.14754	3.36891	3.55501	3.66246	3.75257	3.80514	3.90105	3.98455	4.02301	4.088	4.14428	4.15223	4.17152	4.21666	4.21666	4.21666	4.21666	4.21666	4.21666	4.21666	4.21666	4.21666	4.21666	4.21666	4.21666
721	-0.743606	0.748876	1.13919	1.50946	1.69937	1.84701	2.00462	2.12012	2.37623	2.53331	2.67547	2.78209	2.88274	3.01842	3.1115	3.27245	3.27245	3.27245	3.27245	3.27245	3.27245	3.27245	3.27245	3.27245	3.27245	3.27245	3.27245	3.27245	3.27245	3.27245	3.27245	3.27245	3.27245	3.27245	3.27245	3.27245	3.27245	3.27245	3.27245	3.27245	3.27245
722	-1.26876	-0.417978	1.32802	1.57368	1.767	2.01005	2.19833	2.39695	2.58674	2.71875	2.83594	2.9107	3.00931	3.06911	3.12242	3.1528	3.20191	3.24714	3.35003	3.46453	3.46746	3.47951	3.4976	3.50526	3.5272	3.54641	3.60871	3.62017	3.64746	3.64891	3.66233	3.71102	3.78733	4.05702	4.17362	4.17362	4.17362	4.17362	4.17362	4.17362	4.17362
723	0.0135143	0.568714	0.737544	0.883232	1.0813	1.22292	1.43358	1.56687	1.69273	1.87183	2.1028	2.26481	2.37539	2.54418	2.64963	2.83925	2.94106	3.04997	3.13522	3.18054	3.21214	3.25246	3.37008	3.424	3.47404	3.50202	3.58325	3.60351	3.61937	3.63361	3.63546	3.66324	3.66324	3.66324	3.66324	3.66324	3.66324	3.66324	3.66324	3.66324	3.66324
724	-1.32267	-0.920213	0.694169	1.00969	1.27537	1.52389	1.79587	2.00854	2.20159	2.35082	2.50773	2.63382	2.73916	2.8494	2.95429	3.03705	3.09869	3.16716	3.39737	3.44488	3.55199	3.63468	3.6775	3.74456	3.85971	3.94963	4.00326	4.06096	4.10027	4.10027	4.10027	4.10027	4.10027	4.10027	4.10027	4.10027	4.10027	4.10027	4.10027	4.10027	4.10027
725	-1.15029	0.722146	1.16691	1.42344	1.60156	1.8074	2.00475	2.1614	2.3915	2.53223	2.76019	2.88774	2.98265	3.0734	3.19455	3.26917	3.42176	3.50592	3.54799	3.61661	3.7374	3.7374	3.7374	3.7374	3.7374	3.7374	3.7374	3.7374	3.7374	3.7374	3.7374	3.7374	3.7374	3.7374	3.7374	3.7374	3.7374	3.7374	3.7374	3.7374	3.7374
726	-0.260618	0.192347	0.527328	0.834152	1.09823	1.29567	1.50537	1.69623	1.83596	1.96297	2.0909	2.20929	2.31628	2.44058	2.59349	2.69319	2.79215	2.88328	2.96265	3.15467	3.27094	3.40055	3.55662	3.67172	3.77721	3.85651	3.91916	3.99271	4.12774	4.34318	4.34318	4.34318	4.34318	4.34318	4.34318	4.34318	4.34318	4.34318	4.34318	4.34318	4.34318
727	0.610354	0.942643	1.14328	1.26234	1.40185	1.51684	1.64925	1.7589	1.84881	2.04982	2.13839	2.22841	2.31929	2.44425	2.52528	2.58566	2.63938	2.71144	2.7668	2.82348	2.9015	2.97131	3.02422	3.03003	3.04419	3.19063	3.25437	3.35531	3.41703	3.42372	3.4679	3.4679	3.4679	3.4679	3.4679	3.4679	3.4679	3.4679	3.4679	3.4679	3.4679
728	0.0378971	0.443644	0.844065	1.04506	1.26616	1.48157	1.65195	1.86358	2.05212	2.23313	2.42934	2.59178	2.72774	2.82823	3.08744	3.18158	3.24554	3.38128	3.46418	3.53379	3.60858	3.67896	3.73032	3.79512	3.86701	3.89345	3.91598	3.91598	3.91598	3.91598	3.91598	3.91598	3.91598	3.91598	3.91598	3.91598	3.91598	3.91598	3.91598	3.91598	3.91598
729	-1.36037	1.03035	1.3622	1.60644	1.87238	2.07188	2.24493	2.47461	2.62535	2.76939	2.9829	3.11558	3.3295	3.44468	3.53663	3.60566	3.66007	3.78031	3.84167	4.03087	4.09538	4.17475	4.30275	4.3253	4.43219	4.45619	4.65547	4.69624	4.70918	4.73319	4.75983	4.75983	4.75983	4.75983	4.75983	4.75983	4.75983	4.75983	4.75983	4.75983	4.75983
730	-1.19118	0.145834	1.17103	1.41368	1.60112	1.75842	1.90824	2.19955	2.4224	2.53603	2.67916	2.79766	2.88874	3.14549	3.25129	3.29191	3.37142	3.40731	3.48761	3.57127	3.60458	3.62243	3.65501	3.69695	3.7803	3.86712	3.86712	3.86712	3.86712	3.86712	3.86712	3.86712	3.86712	3.86712	3.86712	3.86712	3.86712	3.86712	3.86712	3.86712	3.86712
731	-1.361	0.0190494	0.319109	0.646312	0.953621	1.22522	1.53455	1.76112	1.98601	2.14886	2.32983	2.40992	2.51409	2.5941	2.61407	2.64312	2.68699	2.72417	2.86979	2.87793	2.99822	3.12461	3.18087	3.18087	3.18087	3.18087	3.18087	3.18087	3.18087	3.18087	3.18087	3.18087	3.18087	3.18087	3.18087	3.18087	3.18087	3.18087	3.18087	3.18087	3.18087
732	-0.74444	0.146737	0.497722	0.910776	1.24018	1.45716	1.63705	1.78959	1.94212	2.18811	2.36117	2.54878	2.7345	2.90301	3.06104	3.2139	3.44965	3.61358	3.71373	3.77138	3.89096	3.94358	3.98659	3.99764	4.0572	4.17674	4.20337	4.23998	4.27436	4.28712	4.3163	4.34359	4.34359	4.34359	4.34359	4.34359	4.34359	4.34359	4.34359	4.34359	4.34359
733	-1.29019	-1.06351	-0.088057	0.307899	0.556039	0.790978	1.00757	1.1996	1.4323	1.67224	1.90185	2.07928	2.18266	2.36337	2.45448	2.5634	2.64039	2.70541	2.85101	3.0448	3.13291	3.17579	3.22785	3.28216	3.37694	3.47699	3.59811	3.63222	3.66043	3.79447	3.89193	3.97056	3.97946	4.10995	4.15269	4.16368	4.16368	4.16368	4.16368	4.16368	4.16368
734	-1.49936	0.497147	0.802649	1.01067	1.21054	1.39313	1.55176	1.74064	1.99952	2.13302	2.23468	2.32333	2.42292	2.50481	2.59852	2.70086	2.77029	2.84012	2.86721	2.93703	3.05851	3.15183	3.19438	3.21432	3.29377	3.36419	3.37149	3.45819	3.48839	3.4955	3.6748	3.74388	3.74388	3.74388	3.74388	3.74388	3.74388	3.74388	3.74388	3.74388	3.74388
735	-1.40612	-0.920213	0.913648	1.19041	1.45371	1.74028	2.03615	2.28085	2.44097	2.666	2.8675	3.04159	3.21657	3.36564	3.50722	3.72977	3.88635	3.99836	4.06317	4.20231	4.23978	4.25743	4.27056	4.34332	4.34332	4.34332	4.34332	4.34332	4.34332	4.34332	4.34332	4.34332	4.34332	4.34332	4.34332	4.34332	4.34332	4.34332	4.34332	4.34332	4.34332
736	0.580264	0.942438	1.23377	1.49809	1.7338	1.92602	2.19013	2.35726	2.50254	2.65102	2.79307	2.87027	2.97768	3.06585	3.13806	3.33109	3.39709	3.43688	3.54979	3.69649	3.76067	3.78399	3.78399	3.78399	3.78399	3.78399	3.78399	3.78399	3.78399	3.78399	3.78399	3.78399	3.78399	3.78399	3.78399	3.78399	3.78399	3.78399	3.78399	3.78399	3.78399
737	-1.53052	0.572129	0.984417	1.31692	1.62577	1.85135	2.08236	2.27525	2.46362	2.6206	2.761	2.91166	3.07328	3.36262	3.47023	3.55459	3.59954	3.74262	3.8582	3.88252	3.88252	3.88252	3.88252	3.88252	3.88252	3.88252	3.88252	3.88252	3.88252	3.88252	3.88252	3.88252	3.88252	3.88252	3.88252	3.88252	3.88252	3.88252	3.88252	3.88252	3.88252
738	0.103197	0.687938	1.0688	1.30996	1.55333	1.92001	2.09207	2.25198	2.40878	2.58276	2.7361	2.87114	3.02774	3.09201	3.18457	3.25583	3.31544	3.34984	3.45697	3.47286	3.53429	3.6083	3.63788	3.77147	3.77147	3.77147	3.77147	3.77147	3.77147	3.77147	3.77147	3.77147	3.77147	3.77147	3.77147	3.77147	3.77147	3.77147	3.77147	3.77147	3.77147
739	-1.58037	-0.643887	-0.093662	0.353011	0.555573	0.729425	0.886065	1.03503	1.22972	1.39161	1.5531	1.74016	1.9686	2.14192	2.29526	2.41913	2.49681	2.67189	2.73339	2.79642	2.86192	2.92252	2.97165	3.04626	3.09932	3.14993	3.21253	3.23674	3.30943	3.33212	3.39249	3.40478	3.46897	3.48831	3.49875	3.50121	3.50121	3.50121	3.50121	3.50121	3.50121
740	-1.15616	-0.99299	-0.887744	-0.124371	0.83202	1.03879	1.223	1.5088	1.75539	2.05342	2.26803	2.42159	2.52105	2.76783	2.87397	2.98789	3.09723	3.20286	3.3091	3.46588	3.51847	3.56647	3.56929	3.57527	3.57527	3.57527	3.57527	3.57527	3.57527	3.57527	3.57527	3.57527	3.57527	3.57527	3.57527	3.57527	3.57527	3.57527	3.57527	3.57527	3.57527
741	-0.878469	0.396235	0.811562	0.977134	1.19141	1.40703	1.54036	1.67705	1.82679	1.92612	2.03556	2.10856	2.18627	2.27459	2.44686	2.51043	2.56221	2.61272	2.6941	2.74299	2.79535	2.84212	2.87361	2.95673	3.13696	3.17316	3.22269	3.30437	3.34676	3.36789	3.36789	3.36789	3.36789	3.36789	3.36789	3.36789	3.36789	3.36789	3.36789	3.36789	3.36789
742	-1.40278	-0.583918	-0.25779	0.498424	0.779152	0.924426	1.21623	1.37244	1.512	1.65058	1.77401	1.94958	2.03849	2.17014	2.33617	2.5191	2.67722	2.75526	2.87201	2.93316	3.06732	3.12772	3.20008	3.2825	3.29421	3.31727	3.50423	3.68546	3.72795	3.78119	3.81378	3.82942	3.82942	3.82942	3.82942	3.82942	3.82942	3.82942	3.82942	3.82942	3.82942
743	-1.41636	0.0771342	0.736178	0.953085	1.12128	1.24214	1.45416	1.58457	1.75025	1.84571	1.99756	2.14897	2.29923	2.48911	2.66008	2.81287	2.97842	3.10873	3.26375	3.37708	3.49186	3.57523	3.66455	3.74674	3.8123	3.86529	3.9122	3.95716	3.9612	3.97189	3.97359	3.97359	3.97359	3.97359	3.97359	3.97359	3.97359	3.97359	3.97359	3.97359	3.97359
744	-1.72121	-1.41275	-1.04901	0.887522	1.10166	1.36707	1.59606	1.74974	1.89413	2.04415	2.22681	2.33915	2.4449	2.54897	2.64852	2.75944	2.96586	3.08377	3.36435	3.48036	3.68589	3.75295	3.79547	3.80816	3.82557	3.89151	3.91782	3.91782	3.91782	3.91782	3.91782	3.91782	3.91782	3.91782	3.91782	3.91782	3.91782	3.91782	3.91782	3.91782	3.91782
745	-1.41505	-0.614803	0.111097	0.440065	0.621254	0.768585	0.903134	1.00303	1.07817	1.18559	1.44884	1.65821	1.8138	1.94959	2.07618	2.17538	2.37026	2.4737	2.65148	2.72849	2.91513	2.99527	3.00843	3.02167	3.09119	3.19694	3.20736	3.21006	3.22453	3.22453	3.22453	3.22453	3.22453	3.22453	3.22453	3.22453	3.22453	3.22453	3.22453	3.22453	3.22453
746	-1.15256	-0.27911	0.625837	0.997584	1.28707	1.51927	1.77492	1.98918	2.19649	2.51194	2.73944	2.86239	2.96782	3.14883	3.23218	3.30081	3.39835	3.44815	3.56743	3.60473	3.62063	3.66161	3.69687	3.72949	3.75678	3.77671	3.81624	3.84408	3.84697	3.87863	3.93843	3.93843	3.93843	3.93843	3.93843	3.93843	3.93843	3.93843	3.93843	3.93843	3.93843
747	-1.09106	0.339332	0.699271	1.06033	1.31384	1.52167	1.84006	1.99129	2.20488	2.32531	2.4696	2.61018	2.70991	2.96253	3.1734	3.32855	3.54978	3.61852	3.68901	3.71471	3.75454	3.84768	3.90744	3.97674	3.97723	3.97723	3.97723	3.97723	3.97723	3.97723	3.97723	3.97723	3.97723	3.97723	3.97723	3.97723	3.97723	3.97723	3.97723	3.97723	3.97723
748	0.184242	0.681029	0.924636	1.13055	1.45136	1.57556	1.70011	1.81973	2.02576	2.10782	2.18474	2.24716	2.30117	2.37108	2.498	2.59434	2.7495	2.84196	2.90354	3.04252	3.08312	3.21599	3.37042	3.42862	3.51419	3.54707	3.63168	3.65124	3.65124	3.65124	3.65124	3.65124	3.65124	3.65124	3.65124	3.65124	3.65124	3.65124	3.65124	3.65124	3.65124
749	-0.920213	-0.144105	0.548736	0.989115	1.25771	1.49154	1.69648	1.88852	2.17219	2.38125	2.54716	2.65635	2.81055	2.93873	3.03088	3.12875	3.23339	3.29576	3.40132	3.43033	3.46578	3.53879	3.59847	3.63816	3.66273	3.69515	3.76176	3.76176	3.76176	3.76176	3.76176	3.76176	3.76176	3.76176	3.76176	3.76176	3.76176	3.76176	3.76176	3.76176	3.76176
750	-1.18464	-0.535503	0.477766	0.697636	0.969714	1.15867	1.34739	1.54588	1.69146	1.81747	1.97851	2.12239	2.26869	2.38986	2.49311	2.60421	2.72299	2.82305	2.91691	3.166	3.39393	3.46414	3.52354	3.55542	3.5843	3.63123	3.6437	3.74356	3.77941	3.82919	3.94176	3.96495	3.96495	3.96495	3.96495	3.96495	3.96495	3.96495	3.96495	3.96495	3.96495
751	0.367785	0.759373	1.05829	1.27264	1.46567	1.61993	1.88857	2.09675	2.21787	2.30608	2.40832	2.5889	2.6612	2.70792	2.79593	2.92427	3.12152	3.24717	3.30797	3.36475	3.43586	3.4904	3.57782	3.68697	3.82157	3.95723	3.97131	4.04233	4.08446	4.08491	4.1212	4.1336	4.1336	4.1336	4.1336	4.1336	4.1336	4.1336	4.1336	4.1336	4.1336
752	-1.39436	0.0494265	0.384112	0.818032	1.35509	1.61684	1.80063	1.93587	2.04521	2.16073	2.259	2.34862	2.48494	2.60656	2.80159	3.0809	3.17613	3.22037	3.32025	3.38288	3.42171	3.4641	3.54677	3.54677	3.54677	3.54677	3.54677	3.54677	3.54677	3.54677	3.54677	3.54677	3.54677	3.54677	3.54677	3.54677	3.54677	3.54677	3.54677	3.54677	3.54677
753	-1.52455	0.375191	0.787556	1.00071	1.22494	1.41273	1.62474	1.77367	1.95838	2.10094	2.22676	2.45532	2.5902	2.71896	2.88052	2.99678	3.09021	3.15865	3.27838	3.33777	3.44426	3.55796	3.66076	3.71416	3.7533	3.83309	3.83565	3.83565	3.83565	3.83565	3.83565	3.83565	3.83565	3.83565	3.83565	3.83565	3.83565	3.83565	3.83565	3.83565	3.83565
754	-0.875069	-0.264583	0.303958	0.704204	1.06253	1.34655	1.57455	1.74511	1.8903	2.03076	2.16953	2.34202	2.52492	2.69585	2.87407	3.00037	3.13984	3.26322	3.35198	3.40452	3.46772	3.58336	3.6815	3.73429	3.76188	3.82816	3.97604	3.99697	3.99697	3.99697	3.99697	3.99697	3.99697	3.99697	3.99697	3.99697	3.99697	3.99697	3.99697	3.99697	3.99697
755	0.731719	1.05696	1.32769	1.57133	1.74185	1.9013	2.05582	2.19965	2.34276	2.48413	2.66281	2.8199	2.97128	3.10097	3.18227	3.24777	3.29325	3.33088	3.33841	3.45744	3.51436	3.66441	3.67044	3.84932	3.84932	3.84932	3.84932	3.84932	3.84932	3.84932	3.84932	3.84932	3.84932	3.84932	3.84932	3.84932	3.84932	3.84932	3.84932	3.84932	3.84932
756	1.16124	1.45448	1.66683	1.8341	1.98459	2.10708	2.23361	2.35814	2.52592	2.6654	2.78119	2.87869	3.16226	3.24769	3.32886	3.43492	3.5548	3.62635	3.69894	3.72296	3.74606	3.76759	3.80509	3.81403	3.83406	3.89096	4.2336	4.32709	4.33477	4.337	4.337	4.337	4.337	4.337	4.337	4.337	4.337	4.337	4.337	4.337	4.337
757	-1.39585	-1.21408	0.124759	0.455776	0.725003	0.921665	1.07608	1.21077	1.33979	1.48043	1.63094	1.77072	2.02194	2.1899	2.34314	2.47009	2.58695	3.11285	3.19525	3.28117	3.37722	3.57349	3.65582	3.73031	3.80988	3.85592	3.85592	3.85592	3.85592	3.85592	3.85592	3.85592	3.85592	3.85592	3.85592	3.85592	3.85592	3.85592	3.85592	3.85592	3.85592
758	0.77724	1.20604	1.43607	1.63852	1.88543	2.05728	2.20484	2.38525	2.56273	2.69783	2.84383	3.03365	3.14664	3.36984	3.57464	3.70915	3.80365	3.88394	3.94668	3.96908	4.16387	4.31504	4.34349	4.45989	4.49005	4.50434	4.50434	4.50434	4.50434	4.50434	4.50434	4.50434	4.50434	4.50434	4.50434	4.50434	4.50434	4.50434	4.50434	4.50434	4.50434
759	-0.123963	0.380957	0.7958	1.16143	1.40435	1.74096	1.96708	2.14655	2.28931	2.41943	2.59734	2.7642	2.93663	3.03366	3.14571	3.21602	3.33728	3.46534	3.65396	3.71044	3.77411	3.84754	3.92097	3.97663	4.04568	4.07457	4.12451	4.14838	4.16299	4.2144	4.2645	4.35146	4.47101	4.57659	4.57659	4.57659	4.57659	4.57659	4.57659	4.57659	4.57659
760	-1.36547	-0.630495	0.802667	1.03625	1.14698	1.29839	1.47756	1.60587	1.7619	1.88935	2.02464	2.13693	2.28599	2.42686	2.59509	2.7123	2.78113	2.91227	3.02491	3.17015	3.30748	3.35945	3.38659	3.46828	3.48582	3.56762	3.59615	3.59615	3.59615	3.59615	3.59615	3.59615	3.59615	3.59615	3.59615	3.59615	3.59615	3.59615	3.59615	3.59615	3.59615
761	-1.46047	0.328049	0.610451	0.839383	0.988766	1.18378	1.42586	1.53722	1.75892	1.87596	1.97234	2.06592	2.14644	2.2211	2.33109	2.50332	2.56832	2.62963	2.70319	2.84858	2.87882	3.04492	3.13897	3.21897	3.28101	3.41088	3.48063	3.50568	3.57091	3.5853	3.5853	3.5853	3.5853	3.5853	3.5853	3.5853	3.5853	3.5853	3.5853	3.5853	3.5853
762	-1.19778	-0.314783	0.116603	0.387219	0.556128	0.720889	0.935175	1.12735	1.29888	1.48784	1.6757	1.79684	1.94021	2.06268	2.16542	2.24245	2.32744	2.39987	2.56551	2.62577	2.70382	2.7745	2.82201	3.0034	3.25656	3.2968	3.363	3.43056	3.493	3.57461	3.62634	3.65754	3.67773	3.69088	3.74876	3.74876	3.74876	3.74876	3.74876	3.74876	3.74876
763	-0.0829818	0.296397	0.671629	0.98881	1.27042	1.49106	1.69931	1.84809	1.98199	2.16281	2.33243	2.48606	2.62412	2.75591	2.89045	3.01182	3.12639	3.22625	3.35181	3.44552	3.51743	3.55767	3.58459	3.63423	3.68923	3.71999	3.73265	3.77093	3.77424	3.93403	3.9825	3.9825	3.9825	3.9825	3.9825	3.9825	3.9825	3.9825	3.9825	3.9825	3.9825
764	0.0451927	0.466694	0.67215	0.848693	1.00634	1.29917	1.45586	1.71346	1.80382	1.88838	2.01617	2.28403	2.35876	2.44371	2.53243	2.6285	2.71304	2.84139	2.95548	3.03206	3.11537	3.25083	3.40485	3.49848	3.60072	3.66676	3.71787	3.74947	3.77579	3.7904	3.80215	3.80215	3.80215	3.80215	3.80215	3.80215	3.80215	3.80215	3.80215	3.80215	3.80215
765	-1.18659	0.247836	0.623617	0.943774	1.16892	1.34581	1.57825	1.75503	1.92395	2.07544	2.22983	2.32549	2.4477	2.62077	2.7276	2.8465	3.00257	3.17422	3.25664	3.3739	3.58658	3.6516	3.70807	3.78541	3.8179	3.82082	3.87413	3.93475	3.93475	3.93475	3.93475	3.93475	3.93475	3.93475	3.93475	3.93475	3.93475	3.93475	3.93475	3.93475	3.93475
766	-1.16877	-0.641695	-0.214898	0.196926	0.579926	0.809038	1.07685	1.27595	1.46903	1.72739	1.88309	2.00436	2.13988	2.34352	2.56174	2.68001	2.78635	2.91433	2.99513	3.09509	3.25699	3.37153	3.44682	3.51713	3.68008	3.85308	3.87324	4.12348	4.21488	4.22499	4.23653	4.23653	4.23653	4.23653	4.23653	4.23653	4.23653	4.23653	4.23653	4.23653	4.23653
767	-1.41734	-1.14385	0.0102833	0.791388	1.09181	1.38792	1.62215	1.8248	2.02415	2.21994	2.41305	2.58848	2.69263	2.77988	2.86972	2.95932	3.04589	3.16263	3.25126	3.32827	3.404	3.4487	3.48511	3.68587	3.7087	3.7136	3.83191	3.93707	3.96294	3.96294	3.96294	3.96294	3.96294	3.96294	3.96294	3.96294	3.96294	3.96294	3.96294	3.96294	3.96294
768	-1.40761	0.981903	1.26324	1.5155	1.76685	1.98931	2.12852	2.2627	2.38099	2.51775	2.62628	2.78353	2.87705	2.94878	3.03565	3.12941	3.21174	3.23855	3.35293	3.38835	3.39631	3.39908	3.48385	3.55338	3.61329	3.61329	3.61329	3.61329	3.61329	3.61329	3.61329	3.61329	3.61329	3.61329	3.61329	3.61329	3.61329	3.61329	3.61329	3.61329	3.61329
769	0.0787018	0.343973	0.575929	0.897235	1.06396	1.29674	1.50861	1.85906	1.99455	2.1844	2.37738	2.56817	2.79548	2.9553	3.04132	3.1059	3.18095	3.30073	3.39042	3.56652	3.67994	3.7726	3.825	3.86869	3.92775	3.94276	3.96657	4.00869	4.08638	4.12233	4.12233	4.12233	4.12233	4.12233	4.12233	4.12233	4.12233	4.12233	4.12233	4.12233	4.12233
770	0.193194	0.47063	0.705745	0.886224	1.07189	1.20815	1.41908	1.57959	1.7274	1.90442	2.01961	2.13293	2.216	2.31273	2.40563	2.48604	2.59095	2.70752	2.79169	2.85292	2.9489	3.0103	3.11226	3.16781	3.29854	3.37891	3.45855	3.4807	3.65693	3.72318	3.81048	3.85279	3.91708	3.91708	3.91708	3.91708	3.91708	3.91708	3.91708	3.91708	3.91708
771	-1.30307	0.760977	1.1072	1.37148	1.57411	1.84336	2.03653	2.23424	2.37847	2.52941	2.72186	2.81733	2.91556	3.00857	3.11924	3.21606	3.27939	3.37099	3.43388	3.52996	3.6195	3.64065	3.75233	3.79084	3.80817	3.82314	3.85535	3.89492	4.00619	4.03762	4.03762	4.03762	4.03762	4.03762	4.03762	4.03762	4.03762	4.03762	4.03762	4.03762	4.03762
772	-1.3714	-0.873645	-0.262022	0.290337	0.557391	0.782872	0.99058	1.17571	1.34159	1.54093	1.71116	1.84253	1.97774	2.13473	2.3145	2.46546	2.57132	2.67339	2.81267	2.99755	3.11914	3.28622	3.3609	3.42598	3.48149	3.58819	3.63421	3.89873	3.96597	3.99557	3.99557	3.99557	3.99557	3.99557	3.99557	3.99557	3.99557	3.99557	3.99557	3.99557	3.99557
773	-0.652183	0.212911	0.663952	0.969706	1.19487	1.39255	1.5903	1.74264	1.91298	2.08354	2.44558	2.54623	2.78011	2.93606	3.05622	3.25188	3.41116	3.49297	3.55666	3.61914	3.6838	3.72031	3.75031	3.75031	3.75031	3.75031	3.75031	3.75031	3.75031	3.75031	3.75031	3.75031	3.75031	3.75031	3.75031	3.75031	3.75031	3.75031	3.75031	3.75031	3.75031
774	-1.17693	0.825132	1.09897	1.26057	1.49113	1.77995	1.89093	1.96352	2.06642	2.14006	2.20088	2.29369	2.44142	2.48204	2.53048	2.57002	2.67462	2.70533	2.74574	2.78814	2.89142	2.94427	2.95617	3.12965	3.20886	3.27472	3.27472	3.27472	3.27472	3.27472	3.27472	3.27472	3.27472	3.27472	3.27472	3.27472	3.27472	3.27472	3.27472	3.27472	3.27472
775	0.699629	0.971957	1.19368	1.40368	1.70132	1.96932	2.14005	2.3374	2.49955	2.66569	2.78314	2.88123	2.98281	3.08923	3.16267	3.21795	3.41061	3.45051	3.53422	3.56614	3.63403	3.68419	3.69655	3.81855	3.82041	3.91759	4.01961	4.12047	4.12943	4.12943	4.12943	4.12943	4.12943	4.12943	4.12943	4.12943	4.12943	4.12943	4.12943	4.12943	4.12943
776	0.174767	0.418338	0.638605	0.897212	1.12228	1.33538	1.60641	1.7617	1.91312	2.07408	2.26771	2.40321	2.48177	2.58787	2.74022	2.83008	2.93803	3.04761	3.1969	3.33497	3.54094	3.71013	3.78876	3.98792	3.99842	4.05598	4.07482	4.07482	4.07482	4.07482	4.07482	4.07482	4.07482	4.07482	4.07482	4.07482	4.07482	4.07482	4.07482	4.07482	4.07482
777	-1.21818	-0.14234	0.438033	0.739104	0.960869	1.15773	1.4086	1.57864	1.73879	1.8754	2.02221	2.1563	2.25844	2.3962	2.48375	2.62281	2.70786	2.78018	2.87117	3.01496	3.22633	3.36391	3.43282	3.54222	3.60556	3.61732	3.68496	3.71065	3.75818	3.76213	3.78644	3.78644	3.78644	3.78644	3.78644	3.78644	3.78644	3.78644	3.78644	3.78644	3.78644
778	-0.507081	0.462362	0.745847	0.989151	1.22678	1.47846	1.69057	1.91068	2.15859	2.48509	2.62535	2.77809	2.92646	3.04301	3.11492	3.20061	3.25885	3.34766	3.43545	3.64445	3.76312	3.78259	3.83211	3.94548	3.99411	4.12518	4.13618	4.13618	4.13618	4.13618	4.13618	4.13618	4.13618	4.13618	4.13618	4.13618	4.13618	4.13618	4.13618	4.13618	4.13618
779	-0.160801	0.926472	1.3125	1.50848	1.69558	2.01098	2.19794	2.32387	2.44108	2.55255	2.71364	2.83453	2.96364	3.06409	3.20229	3.29433	3.31519	3.32241	3.43924	3.56761	3.5743	3.58777	3.65451	3.79515	3.92232	3.98802	4.00584	4.04114	4.12194	4.12194	4.12194	4.12194	4.12194	4.12194	4.12194	4.12194	4.12194	4.12194	4.12194	4.12194	4.12194
780	0.456781	0.806382	1.03583	1.20599	1.40669	1.55045	1.68081	1.82929	1.94399	2.0965	2.20393	2.38034	2.47494	2.52042	2.68561	2.74055	3.00044	3.21412	3.32037	3.41028	3.50415	3.58086	3.6478	3.71197	3.78611	3.95095	4.23857	4.35402	4.40229	4.40229	4.40229	4.40229	4.40229	4.40229	4.40229	4.40229	4.40229	4.40229	4.40229	4.40229	4.40229
781	0.155898	0.376889	0.715242	0.883114	1.00182	1.15496	1.29552	1.43451	1.62083	1.75011	1.86233	2.01596	2.26337	2.39005	2.5183	2.62783	2.74183	2.8509	2.9403	3.03216	3.19257	3.29244	3.47609	3.5538	3.68502	3.77288	3.79942	3.81361	3.83935	3.88617	3.90107	4.15862	4.15862	4.15862	4.15862	4.15862	4.15862	4.15862	4.15862	4.15862	4.15862
782	0.522517	0.781421	1.04137	1.28794	1.57051	1.85377	2.06753	2.25317	2.38756	2.59335	2.77317	2.89672	2.99967	3.22526	3.32853	3.41328	3.48154	3.53888	3.61789	3.70599	3.72019	3.72019	3.72019	3.72019	3.72019	3.72019	3.72019	3.72019	3.72019	3.72019	3.72019	3.72019	3.72019	3.72019	3.72019	3.72019	3.72019	3.72019	3.72019	3.72019	3.72019
783	-0.0571554	0.355381	0.551606	0.815754	1.0152	1.21863	1.38252	1.55034	1.72481	1.88658	2.01567	2.27407	2.48805	2.65747	2.81182	2.95585	3.09384	3.16766	3.38223	3.52424	3.7318	3.8558	3.9022	3.92903	3.95873	3.99404	3.99404	3.99404	3.99404	3.99404	3.99404	3.99404	3.99404	3.99404	3.99404	3.99404	3.99404	3.99404	3.99404	3.99404	3.99404
784	-1.55545	0.470377	0.775892	1.06507	1.27332	1.47139	1.66996	1.95317	2.1856	2.44172	2.64387	2.79716	2.93496	3.07632	3.17856	3.27065	3.35058	3.45765	3.63053	3.63053	3.63053	3.63053	3.63053	3.63053	3.63053	3.63053	3.63053	3.63053	3.63053	3.63053	3.63053	3.63053	3.63053	3.63053	3.63053	3.63053	3.63053	3.63053	3.63053	3.63053	3.63053
785	-0.798853	-0.137112	0.332223	0.669647	0.931905	1.20958	1.38604	1.62647	1.80297	1.94487	2.08703	2.26591	2.45545	2.65099	2.76558	2.87465	3.02376	3.13499	3.24595	3.33112	3.3699	3.41423	3.525	3.61704	3.66598	3.71169	3.76009	3.81882	3.8429	3.9188	4.00072	4.02474	4.03803	4.08646	4.10016	4.11349	4.17436	4.27588	4.27617	4.27617	4.27617
786	-0.370323	0.212981	0.572683	0.877393	1.15312	1.37049	1.56098	1.73289	1.8964	2.06423	2.25067	2.44099	2.53595	2.65325	2.73675	2.81309	2.94346	3.01021	3.13825	3.4982	3.52969	3.61764	3.71231	3.83678	3.8749	3.89248	3.98621	4.00772	4.19061	4.22185	4.28913	4.30572	4.30572	4.30572	4.30572	4.30572	4.30572	4.30572	4.30572	4.30572	4.30572
787	1.24442	1.64854	1.87872	2.06154	2.22039	2.36221	2.4973	2.62818	2.70891	2.77115	2.84311	2.89	2.91932	3.00259	3.08836	3.18689	3.2695	3.40374	3.45571	3.50625	3.56146	3.59951	3.65683	3.74581	3.79629	3.97745	4.11457	4.16221	4.20122	4.22143	4.2268	4.23182	4.31164	4.32521	4.3485	4.39442	4.42501	4.42501	4.42501	4.42501	4.42501
788	0.529363	1.03605	1.32798	1.64387	1.92231	2.10007	2.18005	2.26161	2.32733	2.4625	2.68693	2.82656	2.94594	3.04326	3.14571	3.21287	3.23722	3.26174	3.32882	3.57247	3.59713	3.64845	3.73853	3.73853	3.73853	3.73853	3.73853	3.73853	3.73853	3.73853	3.73853	3.73853	3.73853	3.73853	3.73853	3.73853	3.73853	3.73853	3.73853	3.73853	3.73853
789	-1.25479	0.59894	0.873129	1.12838	1.35695	1.56778	1.81136	1.98558	2.18983	2.47211	2.71555	2.92205	3.1036	3.25192	3.33934	3.37011	3.40822	3.48102	3.51864	3.53804	3.57804	3.59334	3.65833	3.72839	3.8073	3.81263	3.94792	4.03417	4.26856	4.341	4.3575	4.42498	4.43532	4.43532	4.43532	4.43532	4.43532	4.43532	4.43532	4.43532	4.43532
790	-1.68486	-0.517274	0.927647	1.13523	1.34039	1.52761	1.7055	1.86321	2.05579	2.20917	2.34783	2.43811	2.59026	2.7149	2.8646	2.9587	3.05623	3.12282	3.23255	3.31849	3.42315	3.50131	3.59841	3.69001	3.84881	3.94381	4.06234	4.13708	4.20068	4.25896	4.28526	4.28526	4.28526	4.28526	4.28526	4.28526	4.28526	4.28526	4.28526	4.28526	4.28526
791	-1.22703	-0.405424	0.0182976	0.263602	0.467847	0.543513	0.615972	0.672579	0.764123	0.807539	0.840074	0.921016	1.20654	1.43822	1.67076	1.78293	1.84137	1.98122	2.04839	2.15756	2.27732	2.40378	2.51145	2.60666	2.67705	2.72701	2.83937	2.95646	3.07082	3.15841	3.31248	3.35641	3.3993	3.52445	3.7476	3.89597	3.98644	4.00703	4.06743	4.10644	4.13163
792	-0.154289	0.251741	0.647708	0.869121	1.09805	1.27336	1.41294	1.60992	1.7428	1.91035	2.02881	2.12983	2.24797	2.36924	2.49317	2.62582	2.77429	2.866	2.98432	3.14111	3.2362	3.30849	3.35177	3.41071	3.51327	3.56282	3.61466	3.61466	3.61466	3.61466	3.61466	3.61466	3.61466	3.61466	3.61466	3.61466	3.61466	3.61466	3.61466	3.61466	3.61466
793	-0.763039	0.205983	0.915778	1.5419	1.84752	2.03479	2.15564	2.2928	2.4342	2.66867	2.83087	3.18936	3.27373	3.3267	3.44316	3.53231	3.66552	3.90786	4.02177	4.09376	4.13537	4.21274	4.21274	4.21274	4.21274	4.21274	4.21274	4.21274	4.21274	4.21274	4.21274	4.21274	4.21274	4.21274	4.21274	4.21274	4.21274	4.21274	4.21274	4.21274	4.21274
794	-1.3227	0.598002	0.862325	1.12663	1.38662	1.50434	1.65966	1.9444	2.13643	2.26241	2.39725	2.56304	2.74235	2.99123	3.10605	3.26954	3.42492	3.51951	3.60412	3.6898	3.81731	3.89206	3.93131	4.0446	4.08327	4.11226	4.20346	4.20346	4.20346	4.20346	4.20346	4.20346	4.20346	4.20346	4.20346	4.20346	4.20346	4.20346	4.20346	4.20346	4.20346
795	-0.931208	-0.233921	0.330756	0.693545	1.00512	1.1921	1.37156	1.54572	1.70602	1.84694	2.02836	2.15373	2.27131	2.38795	2.53816	2.68041	2.79033	2.83865	2.93501	2.98219	3.0752	3.19801	3.39257	3.55608	3.66661	3.68798	3.79178	3.83838	3.88733	3.99157	4.11409	4.13428	4.14756	4.17518	4.20213	4.32961	4.32961	4.32961	4.32961	4.32961	4.32961
796	0.971705	1.35424	1.67363	1.90361	2.10205	2.18984	2.26713	2.34574	2.41934	2.53815	2.67713	2.73164	2.83977	2.89251	2.97447	3.05255	3.17361	3.1975	3.24428	3.2485	3.36613	3.48003	3.54046	3.60446	3.64768	3.71671	3.74485	3.78387	3.78952	3.85028	3.8737	3.90441	3.97723	4.01621	4.02912	4.06116	4.07879	4.09496	4.09496	4.09496	4.09496
797	0.0654727	0.359044	0.635193	1.05882	1.32357	1.66879	1.84599	2.01443	2.16281	2.28877	2.41346	2.54993	2.65477	2.83033	3.02771	3.12761	3.30574	3.43995	3.53603	3.54277	3.54632	3.55973	3.55973	3.55973	3.55973	3.55973	3.55973	3.55973	3.55973	3.55973	3.55973	3.55973	3.55973	3.55973	3.55973	3.55973	3.55973	3.55973	3.55973	3.55973	3.55973
798	-0.920213	0.865757	1.20489	1.46354	1.75031	1.94555	2.12737	2.44827	2.63799	2.70795	2.77639	2.97914	3.18281	3.2746	3.37593	3.47598	3.62442	3.74773	3.84145	3.99557	4.09669	4.17908	4.25419	4.30318	4.3359	4.41136	4.41136	4.41136	4.41136	4.41136	4.41136	4.41136	4.41136	4.41136	4.41136	4.41136	4.41136	4.41136	4.41136	4.41136	4.41136
799	-0.881441	-0.179616	0.351896	0.64546	0.805107	0.985358	1.15658	1.32597	1.50285	1.67441	1.81438	1.94356	2.0851	2.22814	2.35659	2.46888	2.5806	2.69096	2.84864	2.95474	3.11636	3.22191	3.30959	3.42027	3.48187	3.55891	3.57645	3.7526	3.8464	3.85627	3.85627	3.85627	3.85627	3.85627	3.85627	3.85627	3.85627	3.85627	3.85627	3.85627	3.85627
800	-1.15775	-0.2002	0.175036	0.4372	0.834742	1.12785	1.376	1.59209	1.7838	2.01113	2.21619	2.43691	2.60795	2.77406	2.93754	3.04007	3.1287	3.24874	3.34912	3.40677	3.50297	3.55806	3.68957	3.76175	3.82011	3.92105	3.95012	4.00901	4.00901	4.00901	4.00901	4.00901	4.00901	4.00901	4.00901	4.00901	4.00901	4.00901	4.00901	4.00901	4.00901
801	0.453445	0.8251	1.09042	1.28359	1.45622	1.62532	1.79203	1.99288	2.17147	2.35301	2.50761	2.63935	2.7981	2.93187	3.02139	3.15081	3.35226	3.55201	3.67599	3.78777	3.88318	4.03995	4.09492	4.13455	4.1671	4.23432	4.28342	4.41208	4.41264	4.41264	4.41264	4.41264	4.41264	4.41264	4.41264	4.41264	4.41264	4.41264	4.41264	4.41264	4.41264
802	-1.40553	0.0290379	0.936668	1.31004	1.6184	1.80486	1.99389	2.15238	2.28688	2.3874	2.47312	2.5921	2.647	2.74045	2.82706	2.87526	2.91912	2.98843	3.13813	3.24577	3.36445	3.43505	3.51758	3.57395	3.59815	3.63099	3.64389	3.6478	3.65065	3.65191	3.67378	3.73795	3.76693	3.80494	3.80494	3.80494	3.80494	3.80494	3.80494	3.80494	3.80494
803	-1.43562	-0.956462	0.30564	0.654894	0.91988	1.22654	1.52707	1.66877	1.77412	1.93204	2.1468	2.28296	2.45715	2.63153	2.7648	2.88507	2.99761	3.10734	3.20728	3.32051	3.42238	3.51738	3.60146	3.76376	3.78625	3.81542	3.89569	3.90885	3.90927	3.90927	3.90927	3.90927	3.90927	3.90927	3.90927	3.90927	3.90927	3.90927	3.90927	3.90927	3.90927
804	-1.06963	-0.264545	0.309754	0.641782	0.953348	1.18852	1.32762	1.50504	1.62972	1.70787	1.85143	1.93879	2.03175	2.16632	2.26038	2.35682	2.44309	2.66115	2.78653	2.89324	3.01499	3.10185	3.37074	3.45996	3.5088	3.63922	3.65014	3.69334	3.70821	3.80286	3.93243	3.93243	3.93243	3.93243	3.93243	3.93243	3.93243	3.93243	3.93243	3.93243	3.93243
805	0.270596	0.49186	0.756403	0.931008	1.18233	1.34575	1.50759	1.75052	1.91067	2.03169	2.19386	2.32596	2.53488	2.63569	2.72133	2.78218	2.981	3.12898	3.21945	3.28754	3.34038	3.38367	3.53151	3.71292	3.725	3.725	3.725	3.725	3.725	3.725	3.725	3.725	3.725	3.725	3.725	3.725	3.725	3.725	3.725	3.725	3.725
806	-0.824698	0.0893404	0.662261	0.89844	1.16877	1.34457	1.51979	1.64836	1.81684	1.97097	2.08567	2.20917	2.4431	2.55238	2.69437	2.79298	2.88919	2.93881	3.0275	3.13507	3.30436	3.35173	3.39395	3.44396	3.48874	3.51495	3.53286	3.61502	3.77288	3.80586	4.00878	4.0403	4.08963	4.12085	4.20057	4.20057	4.20057	4.20057	4.20057	4.20057	4.20057
807	-0.999166	0.407623	0.651152	0.879517	1.14775	1.37942	1.61648	1.82475	1.99378	2.16393	2.31166	2.4458	2.5685	2.73164	2.87328	3.0297	3.23589	3.33047	3.42293	3.54945	3.5899	3.62086	3.66279	3.694	3.70772	3.72316	3.76699	3.77209	3.77209	3.77209	3.77209	3.77209	3.77209	3.77209	3.77209	3.77209	3.77209	3.77209	3.77209	3.77209	3.77209
808	-0.183172	0.362265	0.720352	1.10134	1.32988	1.52175	1.68351	1.85022	2.01946	2.2079	2.31062	2.432	2.53672	2.63311	2.72306	2.79038	2.93642	3.08458	3.15959	3.25629	3.30848	3.3553	3.3977	3.42345	3.46581	3.54491	3.60584	3.76147	3.76147	3.76147	3.76147	3.76147	3.76147	3.76147	3.76147	3.76147	3.76147	3.76147	3.76147	3.76147	3.76147
809	-0.642951	0.304454	0.515949	0.717675	0.92221	1.09887	1.25663	1.48244	1.65323	1.79317	1.96761	2.08937	2.20222	2.3283	2.43624	2.54103	2.67844	2.78995	2.91476	2.97512	3.04578	3.17531	3.24065	3.26932	3.32844	3.36984	3.44777	3.44777	3.44777	3.44777	3.44777	3.44777	3.44777	3.44777	3.44777	3.44777	3.44777	3.44777	3.44777	3.44777	3.44777
810	-1.43585	-1.01022	0.50056	0.69863	0.879043	1.05037	1.22494	1.43365	1.63525	1.79557	1.93773	2.24134	2.44585	2.62832	2.76081	2.89585	3.00374	3.12529	3.25311	3.3764	3.53046	3.70949	3.77666	3.88091	3.96606	4.0105	4.04655	4.12008	4.16392	4.2255	4.23136	4.23136	4.23136	4.23136	4.23136	4.23136	4.23136	4.23136	4.23136	4.23136	4.23136
811	-1.46923	-0.0341292	0.346872	0.656408	0.847884	1.08144	1.25067	1.41904	1.58389	1.74002	1.97834	2.15938	2.29686	2.4072	2.55498	2.67453	2.79343	2.91093	3.01256	3.08579	3.17945	3.28546	3.34093	3.40734	3.55081	3.68572	3.69951	3.7348	3.7635	3.7635	3.7635	3.7635	3.7635	3.7635	3.7635	3.7635	3.7635	3.7635	3.7635	3.7635	3.7635
812	0.431899	0.631982	0.851325	1.0411	1.21427	1.38054	1.53808	1.6782	1.81383	1.94987	2.06596	2.47095	2.64215	2.73462	2.85642	3.05848	3.1432	3.22083	3.26813	3.31017	3.43932	3.61001	3.74331	3.76136	3.82848	3.86579	3.88227	3.88409	3.91878	3.99909	4.00751	4.07201	4.31805	4.31983	4.35577	4.48481	4.66147	4.66147	4.66147	4.66147	4.66147
813	-1.00908	0.496708	0.867631	1.21208	1.46552	1.6628	1.88948	2.09706	2.26931	2.4552	2.652	2.80689	2.99143	3.11194	3.21838	3.33586	3.44412	3.54731	3.59341	3.65372	3.69835	3.74506	3.77043	3.81553	3.86346	3.8896	3.95024	4.00933	4.00995	4.00995	4.00995	4.00995	4.00995	4.00995	4.00995	4.00995	4.00995	4.00995	4.00995	4.00995	4.00995
814	-0.883907	0.21742	0.575386	0.827936	1.02682	1.29343	1.60844	1.92974	2.10363	2.2804	2.42542	2.54431	2.63769	2.73466	2.75696	2.79211	2.79211	2.79211	2.79211	2.79211	2.79211	2.79211	2.79211	2.79211	2.79211	2.79211	2.79211	2.79211	2.79211	2.79211	2.79211	2.79211	2.79211	2.79211	2.79211	2.79211	2.79211	2.79211	2.79211	2.79211	2.79211
815	0.592693	0.869751	1.13441	1.34189	1.49114	1.61602	1.77144	1.91863	2.04422	2.18389	2.30677	2.45259	2.5695	2.91566	3.0285	3.08867	3.13082	3.20861	3.27043	3.33413	3.3722	3.43058	3.48565	3.55059	3.74854	3.79672	3.83488	3.83893	3.84813	3.8774	3.92942	4.02401	4.02401	4.02401	4.02401	4.02401	4.02401	4.02401	4.02401	4.02401	4.02401
816	0.135307	0.512062	0.801427	1.02247	1.21922	1.42473	1.62536	1.83103	1.9988	2.11168	2.25092	2.35625	2.50506	2.58872	2.6905	2.80862	2.99025	3.14576	3.25265	3.36638	3.41727	3.46268	3.53091	3.56622	3.60794	3.67649	3.72584	3.74276	3.75695	3.75695	3.75695	3.75695	3.75695	3.75695	3.75695	3.75695	3.75695	3.75695	3.75695	3.75695	3.75695
817	-1.10686	-0.356449	0.415268	0.758751	0.926716	1.08867	1.24074	1.43205	1.63488	1.78387	1.90858	2.0509	2.13386	2.38895	2.64061	2.72727	2.81687	3.01279	3.08414	3.15915	3.21797	3.25765	3.35751	3.40601	3.60181	3.65654	3.98299	3.99912	4.00795	4.13855	4.23089	4.35241	4.39863	4.41739	4.41739	4.41739	4.41739	4.41739	4.41739	4.41739	4.41739
818	-1.29487	-0.187693	0.262388	0.5794	0.822397	1.05773	1.31057	1.48982	1.64225	1.83652	2.00739	2.15438	2.29006	2.4087	2.52094	2.61064	2.77837	2.90046	3.00979	3.11243	3.18841	3.24165	3.32551	3.4011	3.45571	3.53223	3.57758	3.62397	3.70901	3.8089	3.8394	3.91675	3.98429	3.99487	4.08559	4.1251	4.1251	4.1251	4.1251	4.1251	4.1251
819	-1.49886	-1.19622	-0.681813	0.868952	1.11993	1.25024	1.46909	1.6224	1.75985	1.88162	2.00771	2.22904	2.31656	2.39469	2.47965	2.62556	2.72209	2.79528	2.90551	2.968	3.03164	3.09242	3.1268	3.15546	3.19473	3.2505	3.28806	3.31442	3.33623	3.36362	3.36961	3.36961	3.36961	3.36961	3.36961	3.36961	3.36961	3.36961	3.36961	3.36961	3.36961
820	-1.27093	0.252462	0.480116	0.70532	0.874736	1.07335	1.27273	1.43522	1.59393	1.71507	1.82811	1.93669	2.13014	2.21573	2.3335	2.61199	2.74098	2.83936	2.9174	3.04594	3.41566	3.5065	3.54692	3.60914	3.69429	3.72722	3.80291	3.83236	3.83236	3.83236	3.83236	3.83236	3.83236	3.83236	3.83236	3.83236	3.83236	3.83236	3.83236	3.83236	3.83236
821	0.586324	0.835838	1.0708	1.28005	1.485	1.67275	1.82474	1.94753	2.0878	2.2057	2.33358	2.5927	2.74537	2.91893	3.13084	3.24648	3.36767	3.44244	3.55936	3.59334	3.68023	3.7836	3.81002	3.82341	3.86147	3.86147	3.86147	3.86147	3.86147	3.86147	3.86147	3.86147	3.86147	3.86147	3.86147	3.86147	3.86147	3.86147	3.86147	3.86147	3.86147
822	-1.43244	-1.16614	-0.717611	-0.584616	-0.50877	-0.426875	-0.168212	0.490386	0.842333	1.08138	1.50941	1.74771	1.96712	2.11367	2.21572	2.36931	2.47655	2.61677	2.72894	2.82893	2.91802	3.0347	3.15254	3.28387	3.3713	3.4945	3.55756	3.59433	3.63179	3.65477	3.67322	3.80633	3.85948	3.93739	3.9815	3.9815	3.9815	3.9815	3.9815	3.9815	3.9815
823	-0.498855	0.121642	0.333801	0.55804	0.793758	0.969625	1.14309	1.30519	1.38552	1.50438	1.61316	1.74911	1.87528	2.01581	2.14925	2.25281	2.31035	2.36689	2.52475	2.57267	2.67719	2.758	2.83971	3.0202	3.13091	3.23318	3.26741	3.31521	3.37	3.42182	3.45266	3.49471	3.6608	3.67066	3.67676	3.80781	3.88252	3.92385	3.93025	3.95126	3.95988
824	0.192442	0.627241	0.960862	1.30201	1.58031	1.76186	1.93125	2.28774	2.45086	2.65232	2.82275	2.96025	3.0865	3.17044	3.21255	3.28192	3.35974	3.49497	3.59972	3.72413	3.83421	4.00337	4.04411	4.16361	4.27903	4.33083	4.37261	4.37261	4.37261	4.37261	4.37261	4.37261	4.37261	4.37261	4.37261	4.37261	4.37261	4.37261	4.37261	4.37261	4.37261
825	0.165666	0.527955	0.751837	0.94331	1.21054	1.43717	1.64022	1.75764	1.92035	2.1294	2.26963	2.38226	2.54831	2.74605	2.88956	3.06267	3.21832	3.34041	3.41887	3.46697	3.49992	3.66043	3.66043	3.66043	3.66043	3.66043	3.66043	3.66043	3.66043	3.66043	3.66043	3.66043	3.66043	3.66043	3.66043	3.66043	3.66043	3.66043	3.66043	3.66043	3.66043
826	-1.22884	-1.03054	-0.920213	0.572158	0.761661	0.914111	1.0514	1.19096	1.31449	1.53345	1.6742	1.78238	1.84656	2.11875	2.20389	2.30469	2.44797	2.54889	2.64048	2.74899	2.83292	2.89621	2.97114	3.11141	3.18545	3.26045	3.33785	3.47033	3.59021	3.70801	3.74636	3.80362	3.84554	3.97747	4.00036	4.02782	4.05845	4.08281	4.11329	4.23029	4.28885
827	-0.933864	-0.300225	0.398956	0.783776	1.06513	1.28341	1.48593	1.68182	1.87097	2.02015	2.155	2.35615	2.51031	2.62219	2.72422	2.82079	2.89967	2.95302	3.01019	3.07604	3.15878	3.21586	3.30649	3.37892	3.45126	3.57314	3.6112	3.64326	3.7191	3.75241	3.75317	3.75317	3.75317	3.75317	3.75317	3.75317	3.75317	3.75317	3.75317	3.75317	3.75317
828	-1.23697	-0.548021	0.0297993	0.379811	0.609533	0.806455	0.998882	1.14554	1.30668	1.49322	1.6345	1.83703	1.96428	2.16222	2.29011	2.45255	2.6105	2.6757	2.73044	2.80448	2.90384	2.97235	3.04975	3.09042	3.10344	3.14537	3.18283	3.2324	3.25923	3.2655	3.31309	3.4127	3.42018	3.56649	3.67841	3.78004	3.86375	3.86375	3.86375	3.86375	3.86375
829	-0.231776	0.236539	0.524168	0.796806	1.03724	1.24997	1.47375	1.68453	1.8437	1.94651	2.04462	2.13868	2.21386	2.28562	2.35303	2.43043	2.4832	2.56682	2.63643	2.68381	2.78173	2.86525	2.96008	3.00961	3.16307	3.30051	3.3955	3.39769	3.45982	3.46167	3.47804	3.52868	3.52868	3.52868	3.52868	3.52868	3.52868	3.52868	3.52868	3.52868	3.52868
830	-0.838689	0.345334	0.543279	0.729689	0.87714	1.03672	1.17009	1.35661	1.52898	1.76089	2.01495	2.20049	2.34682	2.44847	2.58373	2.75461	2.90674	3.02127	3.11656	3.18409	3.31018	3.38371	3.41192	3.47551	3.56336	3.65787	3.75558	3.9658	4.01931	4.07244	4.12446	4.14324	4.20496	4.29907	4.29907	4.29907	4.29907	4.29907	4.29907	4.29907	4.29907
831	-0.057973	0.301908	0.573909	0.820145	1.10351	1.32503	1.58603	1.79789	2.05313	2.20524	2.35495	2.4673	2.57417	2.75018	2.86854	2.92907	3.01722	3.08006	3.18387	3.31029	3.4076	3.48379	3.52927	3.69369	3.69369	3.69369	3.69369	3.69369	3.69369	3.69369	3.69369	3.69369	3.69369	3.69369	3.69369	3.69369	3.69369	3.69369	3.69369	3.69369	3.69369
832	-1.61732	0.720317	0.981368	1.17923	1.35544	1.56297	1.84341	2.00087	2.17827	2.36426	2.5195	2.6363	2.74447	2.82812	2.94731	3.07145	3.19653	3.36154	3.53598	3.65642	3.74895	3.81587	3.86913	3.90699	3.91659	3.92212	3.92503	3.93087	3.99078	4.05341	4.13903	4.13903	4.13903	4.13903	4.13903	4.13903	4.13903	4.13903	4.13903	4.13903	4.13903
833	-1.22644	0.579861	0.890859	1.16091	1.36971	1.54733	1.73974	1.84845	1.95563	2.17401	2.4134	2.51201	2.65169	2.76579	2.88421	3.00451	3.09599	3.25778	3.34156	3.39302	3.39302	3.39302	3.39302	3.39302	3.39302	3.39302	3.39302	3.39302	3.39302	3.39302	3.39302	3.39302	3.39302	3.39302	3.39302	3.39302	3.39302	3.39302	3.39302	3.39302	3.39302
834	-1.06915	0.0696831	0.691597	0.986118	1.19867	1.38737	1.50345	1.61705	1.73374	1.83644	1.95674	2.12605	2.2375	2.43938	2.58581	2.70783	2.84197	2.89584	3.02839	3.11835	3.17505	3.38575	3.48261	3.50034	3.70425	3.80199	3.89278	3.97063	4.07472	4.10298	4.13188	4.13188	4.13188	4.13188	4.13188	4.13188	4.13188	4.13188	4.13188	4.13188	4.13188
835	-0.094281	0.430054	0.872062	1.1753	1.39139	1.58474	1.76408	1.92858	2.19714	2.34142	2.45463	2.53803	2.67344	2.74887	2.88071	2.94863	3.02594	3.05716	3.11133	3.16115	3.32786	3.42736	3.47373	3.50022	3.53216	3.58278	3.69797	3.91056	3.91056	3.91056	3.91056	3.91056	3.91056	3.91056	3.91056	3.91056	3.91056	3.91056	3.91056	3.91056	3.91056
836	-1.07271	0.382486	0.619829	0.822228	0.924253	1.02036	1.10971	1.38243	1.53466	1.76982	1.95957	2.04642	2.16891	2.32799	2.6535	2.82785	2.92077	3.03283	3.11661	3.21279	3.54263	3.63457	3.73053	3.81711	3.90114	3.98329	3.99847	4.05954	4.07991	4.09842	4.19707	4.24923	4.24923	4.24923	4.24923	4.24923	4.24923	4.24923	4.24923	4.24923	4.24923
837	-0.467015	0.0158129	0.293517	0.482994	0.716339	0.942363	1.15752	1.33472	1.50895	1.70715	1.8952	2.02253	2.23271	2.35748	2.49521	2.6199	2.76449	2.85385	2.93354	3.11778	3.30805	3.45973	3.67892	3.77349	3.82938	3.89111	3.9497	3.9815	4.02557	4.03489	4.15597	4.18128	4.18128	4.18128	4.18128	4.18128	4.18128	4.18128	4.18128	4.18128	4.18128
838	-1.44646	-0.658252	0.0570894	0.567373	0.978543	1.2042	1.38894	1.61864	1.81401	2.00077	2.26757	2.42893	2.55991	2.68127	2.74652	2.82232	2.87895	2.92542	2.99138	3.14908	3.30802	3.35811	3.44904	3.49238	3.52898	3.56799	3.6055	3.61466	3.67113	3.67928	3.67928	3.67928	3.67928	3.67928	3.67928	3.67928	3.67928	3.67928	3.67928	3.67928	3.67928
839	-1.03216	0.310161	0.556425	0.833354	1.01128	1.43985	1.58459	1.70895	1.84212	2.08394	2.19408	2.32096	2.42079	2.53921	2.61512	2.76202	2.89807	2.99775	3.166	3.26143	3.40903	3.55919	3.59559	3.61899	3.67817	3.69482	3.69564	3.69611	3.7361	3.79044	3.79044	3.79044	3.79044	3.79044	3.79044	3.79044	3.79044	3.79044	3.79044	3.79044	3.79044
840	-0.423417	0.41715	0.721248	0.934116	1.14327	1.32832	1.52126	1.778	1.95192	2.11833	2.28962	2.39942	2.66881	2.95728	3.19443	3.34248	3.51007	3.61191	3.77052	4.12106	4.27704	4.36837	4.43201	4.53017	4.58612	4.66077	4.66077	4.66077	4.66077	4.66077	4.66077	4.66077	4.66077	4.66077	4.66077	4.66077	4.66077	4.66077	4.66077	4.66077	4.66077
841	-0.00140715	0.642439	1.1378	1.41908	1.58917	1.75295	1.8534	1.96314	2.08141	2.15762	2.28835	2.3689	2.47999	2.56156	2.66419	2.92071	3.13791	3.19524	3.32304	3.37499	3.41474	3.51026	3.59673	3.59673	3.59673	3.59673	3.59673	3.59673	3.59673	3.59673	3.59673	3.59673	3.59673	3.59673	3.59673	3.59673	3.59673	3.59673	3.59673	3.59673	3.59673
842	-1.26825	-0.0490842	0.254377	0.509791	0.732919	0.939969	1.12905	1.32309	1.51617	1.71044	1.89213	2.07858	2.24894	2.41087	2.51917	2.62518	2.72261	2.8579	2.97379	3.05179	3.12654	3.16025	3.23482	3.3912	3.4155	3.48753	3.50759	3.53662	3.58701	3.60801	3.80077	3.83653	3.94046	3.95068	3.9568	3.97002	4.05609	4.08572	4.09108	4.09108	4.09108
843	-1.09028	0.698423	1.01054	1.26846	1.46298	1.71357	1.95527	2.23949	2.41012	2.5734	2.79093	2.88011	2.98215	3.17337	3.28831	3.40092	3.52255	3.65931	3.78055	3.82317	3.82777	3.82777	3.82777	3.82777	3.82777	3.82777	3.82777	3.82777	3.82777	3.82777	3.82777	3.82777	3.82777	3.82777	3.82777	3.82777	3.82777	3.82777	3.82777	3.82777	3.82777
844	0.324096	0.575334	0.777889	0.920043	1.16113	1.32316	1.44112	1.62029	1.812	1.98869	2.10759	2.39806	2.49819	2.62709	2.71639	2.96925	3.09872	3.20487	3.32112	3.39738	3.54468	3.65403	3.71285	3.75923	3.86368	3.97449	3.99032	3.99032	3.99032	3.99032	3.99032	3.99032	3.99032	3.99032	3.99032	3.99032	3.99032	3.99032	3.99032	3.99032	3.99032
845	-0.939195	-0.0705324	0.280375	0.510136	0.810191	1.20256	1.52669	1.74649	2.02516	2.18799	2.39938	2.55929	2.67791	2.8559	2.98038	3.12724	3.22019	3.32699	3.42552	3.49898	3.56194	3.61574	3.65753	3.76044	3.76076	3.76076	3.76076	3.76076	3.76076	3.76076	3.76076	3.76076	3.76076	3.76076	3.76076	3.76076	3.76076	3.76076	3.76076	3.76076	3.76076
846	-0.548312	1.05703	1.41812	1.66399	1.84629	2.01161	2.1941	2.38436	2.52789	2.71975	2.88288	3.02307	3.11496	3.27923	3.35694	3.49087	3.53484	3.55045	3.56233	3.58626	3.58626	3.58626	3.58626	3.58626	3.58626	3.58626	3.58626	3.58626	3.58626	3.58626	3.58626	3.58626	3.58626	3.58626	3.58626	3.58626	3.58626	3.58626	3.58626	3.58626	3.58626
847	0.0779899	0.581407	0.900192	1.21882	1.53557	1.8032	2.04127	2.24249	2.42594	2.6027	3.03395	3.21645	3.30884	3.34574	3.45097	3.52152	3.54133	3.60083	3.60083	3.60083	3.60083	3.60083	3.60083	3.60083	3.60083	3.60083	3.60083	3.60083	3.60083	3.60083	3.60083	3.60083	3.60083	3.60083	3.60083	3.60083	3.60083	3.60083	3.60083	3.60083	3.60083
848	-1.15175	0.233255	0.759441	0.950477	1.15011	1.29928	1.43179	1.53931	1.74238	1.86067	1.91168	2.02775	2.09393	2.14575	2.21315	2.29261	2.38263	2.43447	2.49516	2.54506	2.67305	2.71476	2.81099	2.97087	3.05103	3.11047	3.25292	3.39488	3.59975	3.64553	3.73313	3.78752	3.82717	3.86478	3.89454	3.9066	3.93504	3.95274	3.97241	3.97241	3.97241
849	-0.238396	0.205206	0.537818	0.910141	1.15227	1.38934	1.55859	1.7176	1.96162	2.24256	2.37754	2.48843	2.60698	2.7861	2.86895	3.04368	3.12105	3.30042	3.38457	3.46083	3.51313	3.58135	3.61493	3.65268	3.69562	3.73501	3.77844	3.78836	3.78836	3.78836	3.78836	3.78836	3.78836	3.78836	3.78836	3.78836	3.78836	3.78836	3.78836	3.78836	3.78836
850	-0.851632	-0.137584	0.439571	0.684865	0.916048	1.14896	1.32768	1.49231	1.6831	1.8195	1.92622	2.0915	2.17404	2.25592	2.33929	2.41592	2.47567	2.52994	2.60502	2.69977	2.75263	2.83071	2.89976	2.94962	3.00256	3.06163	3.08949	3.1255	3.18398	3.23961	3.42447	3.46293	3.51897	3.51897	3.51897	3.51897	3.51897	3.51897	3.51897	3.51897	3.51897
851	-0.80573	0.542556	1.01802	1.32414	1.59072	2.05952	2.28203	2.51102	2.62593	2.8165	3.00844	3.17671	3.29534	3.40479	3.5133	3.54453	3.62388	3.67457	3.7839	3.92801	3.99406	4.09684	4.14543	4.15486	4.17707	4.18961	4.31693	4.32042	4.33115	4.37165	4.38734	4.39819	4.39819	4.39819	4.39819	4.39819	4.39819	4.39819	4.39819	4.39819	4.39819
852	-1.07081	-0.222522	0.27546	0.49794	0.73096	1.00057	1.28731	1.50608	1.68069	1.81548	1.94677	2.0566	2.18356	2.26407	2.39991	2.4705	2.57443	2.6375	2.72295	2.81144	2.86018	2.89152	2.9514	3.02809	3.20718	3.26767	3.36778	3.41944	3.48157	3.51487	3.56781	3.56781	3.56781	3.56781	3.56781	3.56781	3.56781	3.56781	3.56781	3.56781	3.56781
853	-0.186097	0.367614	0.821109	1.12384	1.38101	1.62449	1.84941	2.10374	2.27299	2.53279	2.7449	2.93256	3.07994	3.21428	3.33933	3.45333	3.52655	3.63044	3.72295	3.7798	3.82418	3.89955	3.93406	3.94339	3.94547	4.1646	4.17149	4.20122	4.20122	4.20122	4.20122	4.20122	4.20122	4.20122	4.20122	4.20122	4.20122	4.20122	4.20122	4.20122	4.20122
854	0.759487	1.08301	1.32963	1.51125	1.71256	1.98721	2.21454	2.35938	2.49399	2.61339	2.71956	2.94102	3.07541	3.17393	3.27213	3.3608	3.46035	3.52664	3.57982	3.61522	3.61522	3.61522	3.61522	3.61522	3.61522	3.61522	3.61522	3.61522	3.61522	3.61522	3.61522	3.61522	3.61522	3.61522	3.61522	3.61522	3.61522	3.61522	3.61522	3.61522	3.61522
855	-0.328929	0.0534125	0.435093	0.675415	0.923849	1.1304	1.32105	1.47756	1.68947	1.87591	2.02666	2.16154	2.27971	2.38448	2.48032	2.58737	2.66062	2.82269	2.98146	3.0431	3.137	3.20462	3.26795	3.35871	3.46172	3.55275	3.60077	3.87702	3.93391	3.96084	3.98439	4.11373	4.1158	4.1158	4.1158	4.1158	4.1158	4.1158	4.1158	4.1158	4.1158
856	-0.480558	0.57963	0.904398	1.26344	1.53454	1.76	1.98799	2.19109	2.38123	2.60072	2.75752	2.87066	2.94028	3.04771	3.16474	3.25553	3.31837	3.33838	3.36013	3.38545	3.39165	3.53628	3.53628	3.53628	3.53628	3.53628	3.53628	3.53628	3.53628	3.53628	3.53628	3.53628	3.53628	3.53628	3.53628	3.53628	3.53628	3.53628	3.53628	3.53628	3.53628
857	0.0469276	0.469573	0.789511	0.970107	1.12273	1.31427	1.45204	1.65035	1.79774	1.93339	2.0854	2.21573	2.3446	2.48225	2.61142	2.68841	2.91076	3.00904	3.11824	3.19161	3.26624	3.34005	3.39861	3.48398	3.54458	3.59975	3.67665	3.68629	3.751	3.83542	3.83542	3.83542	3.83542	3.83542	3.83542	3.83542	3.83542	3.83542	3.83542	3.83542	3.83542
858	-1.5975	-1.112	-0.225809	0.118288	0.287723	0.441567	0.557502	0.668271	0.776151	1.08029	1.36998	1.57864	1.71792	1.96599	2.04382	2.2537	2.48096	2.55138	2.59989	2.64317	2.73081	2.82478	2.96743	3.05276	3.08617	3.19471	3.26105	3.26126	3.30662	3.31109	3.35186	3.35186	3.35186	3.35186	3.35186	3.35186	3.35186	3.35186	3.35186	3.35186	3.35186
859	0.123159	0.467402	0.80467	1.16614	1.40146	1.57473	1.76862	1.92027	2.06237	2.20455	2.37373	2.54325	2.68599	2.90572	3.15069	3.35448	3.46494	3.56701	3.63669	3.6956	3.7127	3.74472	3.83566	4.01599	4.02054	4.02054	4.02054	4.02054	4.02054	4.02054	4.02054	4.02054	4.02054	4.02054	4.02054	4.02054	4.02054	4.02054	4.02054	4.02054	4.02054
860	-1.09335	0.65966	0.987779	1.21804	1.38218	1.5101	1.62838	1.73798	1.86812	1.97316	2.06373	2.15012	2.26612	2.43579	2.57841	2.6233	2.67524	2.6961	2.73283	2.96071	3.18537	3.29835	3.42264	3.54039	3.62289	3.65841	3.75107	3.78795	3.80766	3.84881	3.85045	3.85045	3.85045	3.85045	3.85045	3.85045	3.85045	3.85045	3.85045	3.85045	3.85045
861	-1.25029	-0.960293	0.0161313	0.533493	0.806299	1.09739	1.32568	1.49927	1.65628	1.91528	2.09561	2.20187	2.30655	2.39672	2.59564	2.7496	2.85054	2.9434	3.02631	3.29876	3.42407	3.52745	3.5748	3.61496	3.77673	3.88472	3.99844	4.0483	4.05822	4.0966	4.1461	4.1596	4.208	4.26057	4.33596	4.34702	4.36301	4.36301	4.36301	4.36301	4.36301
862	-1.24246	0.500657	1.15326	1.33579	1.48468	1.73709	2.02704	2.3116	2.59379	2.73311	2.83486	2.9833	3.26657	3.53603	3.65014	3.75146	3.86809	3.90063	3.91332	3.94161	3.95095	4.03417	4.05988	4.07332	4.08391	4.09464	4.09464	4.09464	4.09464	4.09464	4.09464	4.09464	4.09464	4.09464	4.09464	4.09464	4.09464	4.09464	4.09464	4.09464	4.09464
863	-1.1224	0.628373	0.990838	1.40046	1.7362	2.08587	2.32547	2.51847	2.6682	2.94861	3.06362	3.19898	3.32081	3.41002	3.48771	3.54303	3.72317	3.90312	4.08964	4.17998	4.20105	4.31523	4.31523	4.31523	4.31523	4.31523	4.31523	4.31523	4.31523	4.31523	4.31523	4.31523	4.31523	4.31523	4.31523	4.31523	4.31523	4.31523	4.31523	4.31523	4.31523
864	-1.28204	-0.326576	0.185074	0.559172	0.814081	1.04317	1.22991	1.47641	1.66509	1.82477	1.94982	2.19357	2.44293	2.55457	2.67465	2.82309	2.91046	3.0233	3.09642	3.18291	3.26145	3.36346	3.44213	3.47321	3.57676	3.63191	3.64237	3.64237	3.64237	3.64237	3.64237	3.64237	3.64237	3.64237	3.64237	3.64237	3.64237	3.64237	3.64237	3.64237	3.64237
865	-0.43835	0.223798	0.494845	0.715553	1.01288	1.2798	1.48773	1.73383	1.92572	2.11562	2.306	2.6106	2.76124	2.89033	3.01658	3.15525	3.30437	3.42352	3.6062	3.70108	3.78944	3.81643	3.83089	3.86569	3.87776	3.97846	4.03177	4.12212	4.19275	4.20234	4.20234	4.20234	4.20234	4.20234	4.20234	4.20234	4.20234	4.20234	4.20234	4.20234	4.20234
866	-0.743606	0.748876	1.13919	1.50946	1.69937	1.84701	2.00462	2.12012	2.37623	2.53331	2.67547	2.78209	2.88274	3.01842	3.1115	3.27245	3.27245	3.27245	3.27245	3.27245	3.27245	3.27245	3.27245	3.27245	3.27245	3.27245	3.27245	3.27245	3.27245	3.27245	3.27245	3.27245	3.27245	3.27245	3.27245	3.27245	3.27245	3.27245	3.27245	3.27245	3.27245
867	-0.47603	0.753705	1.05257	1.33016	1.57802	1.94833	2.16418	2.34823	2.60714	2.80449	3.04089	3.22031	3.33905	3.44431	3.61845	3.68718	3.83061	3.8973	4.06844	4.10747	4.21916	4.25546	4.32009	4.41601	4.44386	4.49387	4.49387	4.49387	4.49387	4.49387	4.49387	4.49387	4.49387	4.49387	4.49387	4.49387	4.49387	4.49387	4.49387	4.49387	4.49387
868	0.166213	0.547017	0.829815	1.20146	1.44783	1.63512	1.82113	1.98927	2.15175	2.28325	2.4703	2.67406	2.87494	3.02463	3.10692	3.17903	3.2235	3.29383	3.42238	3.51004	3.54251	3.54251	3.54251	3.54251	3.54251	3.54251	3.54251	3.54251	3.54251	3.54251	3.54251	3.54251	3.54251	3.54251	3.54251	3.54251	3.54251	3.54251	3.54251	3.54251	3.54251
869	-0.720536	-0.214374	0.12873	0.510441	0.973719	1.18156	1.36602	1.55055	1.79181	2.0061	2.15607	2.38015	2.54762	2.67889	2.81024	2.89219	2.95442	2.99748	3.05027	3.08439	3.10582	3.18263	3.2087	3.21978	3.21978	3.21978	3.21978	3.21978	3.21978	3.21978	3.21978	3.21978	3.21978	3.21978	3.21978	3.21978	3.21978	3.21978	3.21978	3.21978	3.21978
870	-1.53231	-1.23466	-0.919834	0.132676	0.669401	0.900743	1.09491	1.36762	1.54953	1.79959	1.96986	2.10814	2.26341	2.71912	2.81421	2.92789	3.01653	3.0845	3.16611	3.30734	3.41815	3.54769	3.56535	3.68753	3.77461	3.8561	3.87554	3.92472	3.92844	3.92844	3.92844	3.92844	3.92844	3.92844	3.92844	3.92844	3.92844	3.92844	3.92844	3.92844	3.92844
871	-0.84612	0.257991	0.526724	0.715075	0.91713	1.09953	1.36306	1.53941	1.69474	1.92868	2.09007	2.23665	2.43374	2.5763	2.80795	2.88018	3.01867	3.08591	3.22324	3.33752	3.43102	3.49809	3.52969	3.67172	3.75307	3.82599	3.85814	3.85814	3.85814	3.85814	3.85814	3.85814	3.85814	3.85814	3.85814	3.85814	3.85814	3.85814	3.85814	3.85814	3.85814
872	-0.303287	0.15302	0.411392	0.649128	0.923051	1.17204	1.4302	1.62737	1.88966	2.06145	2.46852	2.84396	2.98989	3.12245	3.25236	3.35848	3.4601	3.59746	3.756	3.84155	3.89358	3.94763	4.01478	4.05465	4.08807	4.1584	4.1584	4.1584	4.1584	4.1584	4.1584	4.1584	4.1584	4.1584	4.1584	4.1584	4.1584	4.1584	4.1584	4.1584	4.1584
873	0.601132	0.895294	1.21274	1.46115	1.67629	1.83525	2.04434	2.17068	2.27068	2.39036	2.5477	2.70826	2.771	2.84867	2.90224	2.95302	3.06522	3.08486	3.09103	3.15684	3.33977	3.38669	3.71833	3.71833	3.71833	3.71833	3.71833	3.71833	3.71833	3.71833	3.71833	3.71833	3.71833	3.71833	3.71833	3.71833	3.71833	3.71833	3.71833	3.71833	3.71833
874	0.155898	0.376889	0.715242	0.883114	1.00182	1.15496	1.29552	1.43451	1.62083	1.75011	1.86233	2.01596	2.26337	2.39005	2.5183	2.62783	2.74183	2.8509	2.9403	3.03216	3.19257	3.29244	3.47609	3.5538	3.68502	3.77288	3.79942	3.81361	3.83935	3.88617	3.90107	4.15862	4.15862	4.15862	4.15862	4.15862	4.15862	4.15862	4.15862	4.15862	4.15862
875	-0.286979	0.261531	0.559666	0.7814	0.945219	1.12914	1.30463	1.50405	1.65455	1.88743	1.99899	2.24483	2.37914	2.46488	2.56966	2.62379	2.85611	2.97452	3.13956	3.28931	3.4503	3.53728	3.82287	3.85461	3.93888	3.95903	4.03825	4.10672	4.14055	4.23669	4.23669	4.23669	4.23669	4.23669	4.23669	4.23669	4.23669	4.23669	4.23669	4.23669	4.23669
876	-0.96111	-0.311013	0.0992934	0.41231	0.681283	0.928593	1.101	1.27932	1.46864	1.65219	1.7991	1.9635	2.18558	2.31632	2.41537	2.49343	2.59955	2.70783	2.77272	2.82218	2.88159	2.90623	2.91383	2.94862	3.08139	3.11594	3.1652	3.24583	3.27893	3.28975	3.28975	3.28975	3.28975	3.28975	3.28975	3.28975	3.28975	3.28975	3.28975	3.28975	3.28975
877	-1.39427	-0.36644	0.122219	0.55429	1.01477	1.3532	1.51581	1.67558	1.82694	2.09168	2.23037	2.36535	2.48926	2.65194	2.78718	2.96398	3.09283	3.16271	3.20423	3.24489	3.30622	3.34207	3.42145	3.44488	3.56193	3.76624	3.82717	3.82717	3.82717	3.82717	3.82717	3.82717	3.82717	3.82717	3.82717	3.82717	3.82717	3.82717	3.82717	3.82717	3.82717
878	0.333576	0.819443	1.11252	1.31893	1.51731	1.70837	1.94271	2.15	2.33009	2.61051	2.74356	2.86592	2.98338	3.08532	3.17171	3.23546	3.26585	3.37712	3.48792	3.49962	3.60013	3.66526	3.70299	3.70369	3.70369	3.70369	3.70369	3.70369	3.70369	3.70369	3.70369	3.70369	3.70369	3.70369	3.70369	3.70369	3.70369	3.70369	3.70369	3.70369	3.70369
879	-1.50402	-0.568046	-0.0389251	0.441307	0.712439	0.897754	1.04017	1.17408	1.314	1.4084	1.50721	1.74009	2.00236	2.17912	2.33	2.44374	2.52707	2.60829	2.68759	2.79652	2.86484	2.95826	3.02852	3.11542	3.18896	3.23885	3.35988	3.49541	3.59134	3.7827	3.78711	3.78711	3.78711	3.78711	3.78711	3.78711	3.78711	3.78711	3.78711	3.78711	3.78711
880	-0.582876	0.672296	0.985177	1.23082	1.44901	1.71982	1.90615	2.08955	2.24712	2.33666	2.48092	2.55839	2.62935	2.69609	2.77826	2.90018	3.00633	3.04931	3.142	3.24234	3.27068	3.35347	3.44018	3.51637	3.60842	3.73283	3.81145	3.81494	3.81494	3.81494	3.81494	3.81494	3.81494	3.81494	3.81494	3.81494	3.81494	3.81494	3.81494	3.81494	3.81494
881	-0.301623	0.0213317	0.320547	0.548227	0.720772	0.914195	1.07219	1.22134	1.36897	1.53382	1.70947	1.82811	1.9562	2.0827	2.19762	2.28916	2.43848	2.52442	2.62393	2.68846	2.88994	2.95163	3.03647	3.15692	3.23975	3.30067	3.40336	3.43936	3.48271	3.50931	3.57026	3.58236	3.63916	3.63916	3.63916	3.63916	3.63916	3.63916	3.63916	3.63916	3.63916
882	-0.0371446	0.498126	0.873975	1.07807	1.28446	1.47769	1.63764	1.83065	2.08091	2.32394	2.4834	2.66608	2.81179	2.97271	3.21403	3.51469	3.58818	3.62252	3.71506	3.80651	3.8496	3.88365	3.9599	3.99068	3.99068	3.99068	3.99068	3.99068	3.99068	3.99068	3.99068	3.99068	3.99068	3.99068	3.99068	3.99068	3.99068	3.99068	3.99068	3.99068	3.99068
883	-1.54407	0.316262	0.6247	0.836483	1.10337	1.26824	1.42495	1.55971	1.68567	1.80996	1.93696	2.08131	2.1778	2.28328	2.39191	2.48315	2.62259	2.7183	2.78987	2.85885	2.90363	2.97613	3.05284	3.09416	3.1499	3.18708	3.31866	3.36287	3.45246	3.53837	3.59162	3.64055	3.66331	3.76856	3.7777	3.81091	3.81091	3.81091	3.81091	3.81091	3.81091
884	-0.584612	-0.334304	-0.15642	-0.0254369	0.0965055	0.185059	0.40791	0.857627	1.31498	1.65606	1.82943	1.99208	2.1433	2.29911	2.45648	2.61005	2.73226	2.93812	3.0174	3.16235	3.22859	3.32016	3.37109	3.43573	3.52581	3.55094	3.6432	3.70308	3.72591	3.73916	3.81952	3.8769	3.94385	3.98047	4.08215	4.08215	4.08215	4.08215	4.08215	4.08215	4.08215
885	-1.65163	-1.26348	1.22299	1.46531	1.70138	1.98137	2.17609	2.32322	2.46568	2.60849	2.78711	2.89566	3.01182	3.1176	3.19514	3.27128	3.34907	3.41806	3.47716	3.53344	3.54625	3.58854	3.59077	3.60293	3.68698	3.72082	3.75697	3.78865	3.80701	3.80701	3.80701	3.80701	3.80701	3.80701	3.80701	3.80701	3.80701	3.80701	3.80701	3.80701	3.80701
886	-0.412056	-0.116684	0.337205	0.981721	1.20643	1.40184	1.56054	1.71938	1.86393	2.02657	2.21008	2.37849	2.53215	2.67678	2.80098	2.91047	3.13181	3.34228	3.47432	3.64124	3.77034	3.87518	3.97543	4.07873	4.14624	4.14624	4.14624	4.14624	4.14624	4.14624	4.14624	4.14624	4.14624	4.14624	4.14624	4.14624	4.14624	4.14624	4.14624	4.14624	4.14624
887	-0.900768	0.419551	0.747734	1.00676	1.21876	1.419	1.59302	1.76483	1.92303	2.11414	2.25701	2.41279	2.51922	2.61805	2.71077	2.83525	2.98534	3.18037	3.24164	3.309	3.40651	3.48985	3.69003	3.8067	3.86183	3.89619	3.9379	3.97063	4.01138	4.02186	4.02186	4.02186	4.02186	4.02186	4.02186	4.02186	4.02186	4.02186	4.02186	4.02186	4.02186
888	0.327991	0.663812	1.02626	1.33377	1.61091	1.88031	2.14612	2.36525	2.5226	2.66522	2.83512	2.97604	3.12537	3.24626	3.35838	3.46939	3.61346	3.68325	3.74201	3.79995	3.84877	3.97718	4.06348	4.12549	4.14388	4.18017	4.18827	4.21954	4.23682	4.23682	4.23682	4.23682	4.23682	4.23682	4.23682	4.23682	4.23682	4.23682	4.23682	4.23682	4.23682
889	0.417958	0.837978	1.16811	1.37626	1.57342	1.75487	1.92997	2.06906	2.22999	2.41725	2.56279	2.71853	2.85034	2.97267	3.08145	3.18616	3.28842	3.41891	3.51505	3.55755	3.62457	3.66425	3.71568	3.82133	3.86576	3.95145	4.01488	4.0806	4.11914	4.11914	4.11914	4.11914	4.11914	4.11914	4.11914	4.11914	4.11914	4.11914	4.11914	4.11914	4.11914
890	-0.104528	0.77027	1.13314	1.37774	1.57878	1.71056	1.87563	2.00833	2.12598	2.30635	2.49543	2.60187	2.7212	2.91683	3.02688	3.0923	3.20148	3.28624	3.34835	3.42672	3.46802	3.61983	3.63847	3.63847	3.63847	3.63847	3.63847	3.63847	3.63847	3.63847	3.63847	3.63847	3.63847	3.63847	3.63847	3.63847	3.63847	3.63847	3.63847	3.63847	3.63847
891	-0.988209	-0.565318	-0.199599	0.0498961	0.303335	0.532456	0.720864	0.888059	1.04937	1.20637	1.37224	1.51241	1.66568	1.77359	1.96542	2.2179	2.32876	2.46649	2.6051	2.77494	3.00119	3.13422	3.25768	3.37659	3.47582	3.57034	3.66779	3.75799	3.84667	3.98173	4.08097	4.22576	4.36614	4.45045	4.65	4.7352	4.84173	4.88937	4.88937	4.88937	4.88937
892	-0.192946	0.118041	0.325681	0.560414	0.788335	0.954679	1.11651	1.29176	1.40757	1.50742	1.60999	1.70732	1.83408	1.98864	2.1741	2.348	2.4958	2.6216	2.76628	2.98304	3.17174	3.31818	3.50063	3.60124	3.69983	3.82599	3.91443	4.03905	4.1885	4.1885	4.1885	4.1885	4.1885	4.1885	4.1885	4.1885	4.1885	4.1885	4.1885	4.1885	4.1885
893	-1.22086	0.114352	0.62471	0.897986	1.17381	1.47463	1.73475	1.9208	2.10385	2.30157	2.62203	2.78891	2.95038	3.12676	3.26859	3.44256	3.50437	3.55612	3.6095	3.65648	3.69845	3.74114	3.79998	3.81255	3.83517	3.83517	3.83517	3.83517	3.83517	3.83517	3.83517	3.83517	3.83517	3.83517	3.83517	3.83517	3.83517	3.83517	3.83517	3.83517	3.83517
894	-1.40472	-1.26434	-1.21653	-1.16102	-1.11728	-1.0626	-1.02559	-0.97967	-0.903793	-0.81403	-0.746541	-0.702104	-0.642696	-0.606823	-0.562995	-0.528115	-0.468763	-0.419207	-0.391179	-0.368257	-0.350858	-0.330942	-0.312661	-0.289193	-0.273845	-0.273845	-0.273845	-0.273845	-0.273845	-0.273845	-0.273845	-0.273845	-0.273845	-0.273845	-0.273845	-0.273845	-0.273845	-0.273845	-0.273845	-0.273845	-0.273845
895	0.437562	0.636706	0.818238	0.999542	1.14789	1.29103	1.48723	1.61977	1.75559	1.90093	2.06718	2.19222	2.31458	2.42699	2.49411	2.60701	2.70155	2.79877	2.95255	3.05392	3.11447	3.23396	3.31847	3.39946	3.46764	3.52557	3.57651	3.63307	3.69337	3.72712	3.77182	3.80388	3.80813	3.81538	3.83877	3.83877	3.83877	3.83877	3.83877	3.83877	3.83877
896	-0.920213	1.07351	1.37221	1.59511	1.75503	1.90002	2.09108	2.27018	2.43745	2.57764	2.69233	2.82494	2.93305	3.15456	3.24332	3.37449	3.6093	3.76565	3.83604	3.88306	3.9188	3.97908	3.99607	4.00533	4.0131	4.05403	4.1002	4.10712	4.10712	4.10712	4.10712	4.10712	4.10712	4.10712	4.10712	4.10712	4.10712	4.10712	4.10712	4.10712	4.10712
897	-1.48695	0.0208669	0.334335	0.5649	0.812689	1.05205	1.23376	1.42169	1.5733	1.69232	1.88769	1.96295	2.04924	2.14599	2.25883	2.38299	2.47113	2.55229	2.60886	2.64497	2.73238	2.79194	2.90922	2.92922	3.02266	3.08399	3.09446	3.11957	3.18871	3.2994	3.5035	3.61456	3.75151	3.89622	3.95871	3.99255	4.01075	4.02758	4.0568	4.0568	4.0568
898	-1.34837	-0.216267	0.253694	0.821253	1.13063	1.3688	1.62122	1.7952	1.95797	2.12559	2.38682	2.57776	2.70375	2.86679	3.02339	3.13144	3.2461	3.39194	3.52311	3.7262	3.74842	3.74861	3.74861	3.74861	3.74861	3.74861	3.74861	3.74861	3.74861	3.74861	3.74861	3.74861	3.74861	3.74861	3.74861	3.74861	3.74861	3.74861	3.74861	3.74861	3.74861
899	-1.45242	0.0436787	0.38634	0.646218	0.821146	1.06187	1.3156	1.5741	1.78378	1.94689	2.08789	2.35589	2.53069	2.62098	2.70284	2.74823	2.92664	3.07872	3.22118	3.31665	3.42001	3.44256	3.49717	3.56505	3.69653	3.71868	3.72919	3.73576	3.73576	3.73576	3.73576	3.73576	3.73576	3.73576	3.73576	3.73576	3.73576	3.73576	3.73576	3.73576	3.73576
900	-1.41638	-0.931888	0.529686	0.84615	1.0545	1.22475	1.43589	1.59468	1.75766	1.87443	1.97325	2.0568	2.15794	2.23787	2.36742	2.48409	2.62823	2.70139	2.82725	3.13184	3.2106	3.2689	3.32283	3.37646	3.42202	3.45619	3.48777	3.50725	3.51245	3.58984	3.61944	3.64038	3.69187	3.69187	3.69187	3.69187	3.69187	3.69187	3.69187	3.69187	3.69187
901	-1.52837	-0.839371	0.67161	0.939276	1.17949	1.38949	1.60256	1.75506	1.93366	2.08809	2.30012	2.43145	2.56987	2.65239	2.80408	2.88687	2.96671	3.02451	3.0695	3.21167	3.37665	3.46543	3.58977	3.74357	3.7994	3.80104	3.8371	3.85092	3.86208	3.86294	3.86294	3.86294	3.86294	3.86294	3.86294	3.86294	3.86294	3.86294	3.86294	3.86294	3.86294
902	-1.0328	0.533069	0.830313	1.05306	1.26331	1.4219	1.55721	1.77929	2.00005	2.12802	2.21331	2.44606	2.55014	2.64608	2.81878	2.9478	2.9948	3.04854	3.0695	3.17709	3.23752	3.25545	3.28138	3.38112	3.60868	3.68392	3.68392	3.68392	3.68392	3.68392	3.68392	3.68392	3.68392	3.68392	3.68392	3.68392	3.68392	3.68392	3.68392	3.68392	3.68392
903	-1.37695	-0.920213	1.02733	1.36534	1.57789	1.8236	2.01604	2.19441	2.50822	2.67757	2.85257	2.95014	3.34897	3.47033	3.5582	3.63552	3.70497	3.75715	3.84296	3.88223	3.94395	3.98466	4.02213	4.0854	4.14073	4.14073	4.14073	4.14073	4.14073	4.14073	4.14073	4.14073	4.14073	4.14073	4.14073	4.14073	4.14073	4.14073	4.14073	4.14073	4.14073
904	-0.771995	-0.104771	0.253663	0.585773	0.9215	1.20367	1.51996	1.75471	1.96845	2.13556	2.26629	2.38915	2.504	2.61297	2.76201	2.98762	3.0861	3.20636	3.27217	3.32416	3.37234	3.37234	3.37234	3.37234	3.37234	3.37234	3.37234	3.37234	3.37234	3.37234	3.37234	3.37234	3.37234	3.37234	3.37234	3.37234	3.37234	3.37234	3.37234	3.37234	3.37234
905	-0.550741	-0.086298	0.357927	0.681521	0.923784	1.12256	1.3218	1.52896	1.67013	1.78541	1.8971	2.0417	2.19783	2.3472	2.45815	2.54872	2.64615	2.78334	2.92872	3.15374	3.28379	3.29411	3.33558	3.34272	3.3903	3.47056	3.49222	3.49474	3.52617	3.57553	3.59517	3.63836	3.66965	3.68337	3.90795	3.90795	3.90795	3.90795	3.90795	3.90795	3.90795
906	-0.360277	0.631095	0.993263	1.31659	1.59593	1.83718	2.04747	2.23907	2.41881	2.62683	2.87153	3.0115	3.13852	3.25463	3.32489	3.39289	3.56297	3.6233	3.63932	3.76962	3.76962	3.76962	3.76962	3.76962	3.76962	3.76962	3.76962	3.76962	3.76962	3.76962	3.76962	3.76962	3.76962	3.76962	3.76962	3.76962	3.76962	3.76962	3.76962	3.76962	3.76962
907	-1.38019	-0.158417	0.87547	1.24393	1.60511	1.73239	1.84071	1.95741	2.11221	2.32046	2.49591	2.66829	2.80397	2.86923	2.92283	2.99841	3.10416	3.22858	3.31888	3.38706	3.4404	3.53735	3.59373	3.59373	3.59373	3.59373	3.59373	3.59373	3.59373	3.59373	3.59373	3.59373	3.59373	3.59373	3.59373	3.59373	3.59373	3.59373	3.59373	3.59373	3.59373
908	-1.45572	0.113324	0.922166	1.19971	1.46571	1.65522	1.83415	1.99714	2.13418	2.299	2.51616	2.80617	2.9423	3.04513	3.18308	3.23617	3.32505	3.35822	3.40563	3.47126	3.59597	3.61522	3.67846	3.74675	3.81422	3.9893	3.99864	3.99864	3.99864	3.99864	3.99864	3.99864	3.99864	3.99864	3.99864	3.99864	3.99864	3.99864	3.99864	3.99864	3.99864
909	0.457745	0.744635	0.925732	1.10845	1.27054	1.41562	1.61187	1.88575	2.0403	2.17617	2.33747	2.46687	2.59058	2.70939	2.80033	3.03184	3.09799	3.17937	3.28243	3.33153	3.36323	3.41199	3.64021	3.72219	3.73521	3.76139	3.76139	3.76139	3.76139	3.76139	3.76139	3.76139	3.76139	3.76139	3.76139	3.76139	3.76139	3.76139	3.76139	3.76139	3.76139
910	-1.30309	-0.88114	-0.60338	-0.152803	0.106736	0.504586	0.725536	1.10242	1.46942	1.65671	1.781	1.86478	1.99795	2.21675	2.32295	2.39089	2.45043	2.50772	2.5511	2.64257	2.81065	2.91593	3.11375	3.17105	3.26637	3.27798	3.32198	3.32198	3.32198	3.32198	3.32198	3.32198	3.32198	3.32198	3.32198	3.32198	3.32198	3.32198	3.32198	3.32198	3.32198
911	-1.26436	-0.500764	0.110994	0.715028	1.04379	1.33767	1.57853	1.84454	2.07628	2.19554	2.40283	2.53702	2.68901	2.85562	2.98581	3.21581	3.29247	3.34625	3.44891	3.48933	3.57502	3.59244	3.98298	4.1565	4.25393	4.2702	4.28036	4.28369	4.28369	4.28369	4.28369	4.28369	4.28369	4.28369	4.28369	4.28369	4.28369	4.28369	4.28369	4.28369	4.28369
912	-0.776918	-0.267554	0.237493	0.796563	1.04628	1.2985	1.52979	1.7414	1.92891	2.0751	2.1817	2.35004	2.48017	2.59881	2.76945	2.89464	3.03043	3.16969	3.27741	3.3721	3.42497	3.51092	3.58364	3.64355	3.74565	3.84503	3.96185	4.02112	4.08981	4.18136	4.29406	4.35042	4.44431	4.5147	4.53982	4.59274	4.70518	4.70662	4.70662	4.70662	4.70662
913	-1.37438	-0.275786	0.209555	0.507282	0.904244	1.10158	1.34567	1.54251	1.72691	1.9067	2.10305	2.31189	2.43913	2.56606	2.84764	2.9479	3.21856	3.33373	3.4093	3.6572	3.73273	3.7854	3.80589	3.81372	3.87379	3.89804	3.98025	4.06647	4.12263	4.20519	4.24245	4.26658	4.27091	4.27091	4.27091	4.27091	4.27091	4.27091	4.27091	4.27091	4.27091
914	-1.014	0.967347	1.25571	1.48004	1.69951	1.92276	2.09171	2.24473	2.39159	2.47384	2.55313	2.65231	2.73685	2.83057	2.9339	3.03003	3.10964	3.17175	3.2998	3.35148	3.46773	3.65039	3.88157	3.94098	3.99367	4.01697	4.01837	4.01837	4.01837	4.01837	4.01837	4.01837	4.01837	4.01837	4.01837	4.01837	4.01837	4.01837	4.01837	4.01837	4.01837
915	-1.27312	0.149002	0.562576	0.795921	0.98627	1.23925	1.43338	1.59771	1.7598	1.97595	2.10972	2.32193	2.54469	2.73859	2.84666	2.95443	3.04793	3.15794	3.23703	3.30472	3.34844	3.38076	3.41389	3.42088	3.44389	3.46339	3.46339	3.46339	3.46339	3.46339	3.46339	3.46339	3.46339	3.46339	3.46339	3.46339	3.46339	3.46339	3.46339	3.46339	3.46339
916	-0.935882	0.698758	1.07609	1.33474	1.66667	1.9803	2.24329	2.45827	2.61597	2.78572	2.8917	3.01199	3.23327	3.38633	3.46751	3.50273	3.51203	3.51453	3.52897	3.52897	3.52897	3.52897	3.52897	3.52897	3.52897	3.52897	3.52897	3.52897	3.52897	3.52897	3.52897	3.52897	3.52897	3.52897	3.52897	3.52897	3.52897	3.52897	3.52897	3.52897	3.52897
917	-1.37045	0.514929	0.812234	1.02925	1.21997	1.37141	1.48468	1.5958	1.7067	1.80244	1.99704	2.1522	2.42617	2.71095	2.80477	2.85552	3.13453	3.2109	3.25827	3.28471	3.43127	3.49012	3.5307	3.54845	3.60779	3.62547	3.71308	3.80699	3.98468	4.07134	4.17534	4.17534	4.17534	4.17534	4.17534	4.17534	4.17534	4.17534	4.17534	4.17534	4.17534
918	-1.27452	0.280034	0.710121	1.11699	1.31277	1.45241	1.64127	1.84997	2.01423	2.12228	2.29586	2.40861	2.49304	2.60053	2.66155	2.75981	2.91737	3.00628	3.17895	3.28595	3.30885	3.48733	3.59135	3.61266	3.61266	3.61266	3.61266	3.61266	3.61266	3.61266	3.61266	3.61266	3.61266	3.61266	3.61266	3.61266	3.61266	3.61266	3.61266	3.61266	3.61266
919	-1.43236	-0.244229	0.182625	0.377352	0.56498	0.752148	0.914998	1.01082	1.13766	1.31852	1.48598	1.63818	1.91753	2.15883	2.29727	2.38605	2.49069	2.65714	2.77966	2.8911	2.97599	3.05075	3.10613	3.35408	3.42703	3.48006	3.61982	3.66769	3.95913	4.00901	4.01729	4.02643	4.12406	4.15045	4.17272	4.17272	4.17272	4.17272	4.17272	4.17272	4.17272
920	0.798723	1.2376	1.64961	1.86804	2.05308	2.23507	2.31354	2.37845	2.42467	2.54825	2.60365	2.68789	2.74556	2.79432	2.81914	2.85992	2.93704	3.02433	3.1194	3.2496	3.39708	3.49926	3.56905	3.61036	3.61192	3.61192	3.61192	3.61192	3.61192	3.61192	3.61192	3.61192	3.61192	3.61192	3.61192	3.61192	3.61192	3.61192	3.61192	3.61192	3.61192
921	-1.46674	-0.12786	0.88866	1.18217	1.38821	1.71484	1.96705	2.1042	2.21487	2.35949	2.43761	2.59395	2.7534	2.90704	3.01736	3.14858	3.22912	3.29762	3.43482	3.46774	3.5068	3.52831	3.52831	3.52831	3.52831	3.52831	3.52831	3.52831	3.52831	3.52831	3.52831	3.52831	3.52831	3.52831	3.52831	3.52831	3.52831	3.52831	3.52831	3.52831	3.52831
922	-0.136392	0.545336	0.824068	1.05651	1.28211	1.49964	1.6545	1.77095	1.87672	1.97689	2.06164	2.2622	2.32242	2.41354	2.51797	2.66518	2.95107	3.05367	3.14804	3.24357	3.29119	3.3229	3.34711	3.35521	3.42018	3.53122	3.60746	3.62181	3.66488	3.74965	3.81824	3.88162	3.95382	4.01392	4.04566	4.04566	4.04566	4.04566	4.04566	4.04566	4.04566
923	0.00256789	0.274008	0.489619	0.687568	0.805554	1.04721	1.24336	1.46888	1.58043	1.882	2.015	2.08939	2.17226	2.22526	2.32328	2.42487	2.4544	2.50293	2.56906	2.69092	2.75733	2.85751	2.9216	3.06201	3.11765	3.22727	3.26545	3.28962	3.30738	3.30932	3.34872	3.36694	3.37484	3.38381	3.45562	3.49127	3.52401	3.52537	3.52537	3.52537	3.52537
924	-1.35867	0.667313	0.94174	1.21265	1.44511	1.68418	1.85207	1.99576	2.1021	2.31816	2.44246	2.55634	2.65023	2.79926	2.93108	3.10526	3.23522	3.27575	3.6754	3.80803	3.88184	3.92	3.98179	4.10762	4.16472	4.18115	4.18115	4.18115	4.18115	4.18115	4.18115	4.18115	4.18115	4.18115	4.18115	4.18115	4.18115	4.18115	4.18115	4.18115	4.18115
925	-1.13116	-0.22558	0.133921	0.395884	0.567096	0.714815	0.852933	1.00141	1.18925	1.34661	1.49126	1.62509	1.78863	1.93011	2.04606	2.14091	2.21736	2.28166	2.35926	2.45879	2.53419	2.62726	2.69469	2.72272	2.78071	2.80638	2.87663	3.07447	3.20003	3.36613	3.49067	3.64608	3.78773	3.85259	3.90425	3.91442	3.92063	3.96265	3.96914	4.03424	4.09318
926	-1.11224	-0.052138	0.462654	0.785082	1.0504	1.30695	1.53507	1.78577	2.00965	2.22494	2.4114	2.55452	2.73284	2.86528	3.04798	3.19337	3.32388	3.41717	3.47994	3.58219	3.63884	3.733	3.8654	3.97474	4.08387	4.08648	4.08648	4.08648	4.08648	4.08648	4.08648	4.08648	4.08648	4.08648	4.08648	4.08648	4.08648	4.08648	4.08648	4.08648	4.08648
927	0.310459	0.574202	0.798771	1.04104	1.2602	1.48144	1.67725	1.79632	1.98264	2.17583	2.36321	2.55703	2.65759	2.78327	2.87977	3.0056	3.11491	3.2132	3.31147	3.40796	3.52585	3.55322	3.66618	3.73374	3.78525	3.78525	3.78525	3.78525	3.78525	3.78525	3.78525	3.78525	3.78525	3.78525	3.78525	3.78525	3.78525	3.78525	3.78525	3.78525	3.78525
928	0.668205	1.01422	1.34442	1.5999	1.81254	1.97822	2.09843	2.26542	2.36835	2.56062	2.7054	2.82152	3.00754	3.09305	3.15962	3.23782	3.34454	3.40626	3.43008	3.48789	3.50354	3.51741	3.55489	3.68593	3.7247	3.76616	3.76616	3.76616	3.76616	3.76616	3.76616	3.76616	3.76616	3.76616	3.76616	3.76616	3.76616	3.76616	3.76616	3.76616	3.76616
929	-1.16542	-0.333952	0.179852	0.492339	0.735573	0.945192	1.1059	1.25795	1.41172	1.55215	1.71622	1.97904	2.1238	2.24954	2.37987	2.51201	2.62862	2.73494	2.88217	2.98353	3.05686	3.13812	3.20376	3.3005	3.47442	3.54387	3.5966	3.62211	3.6352	3.71629	3.71629	3.71629	3.71629	3.71629	3.71629	3.71629	3.71629	3.71629	3.71629	3.71629	3.71629
930	1.58388	1.79683	1.96755	2.13761	2.28272	2.43369	2.53614	2.67898	2.81792	2.93751	3.15488	3.24091	3.32378	3.41273	3.48643	3.53382	3.55888	3.65896	3.77681	3.79756	3.81323	3.82861	3.83752	3.88586	3.93197	3.93197	3.93197	3.93197	3.93197	3.93197	3.93197	3.93197	3.93197	3.93197	3.93197	3.93197	3.93197	3.93197	3.93197	3.93197	3.93197
931	-1.03655	0.468375	0.74214	1.00735	1.2003	1.37831	1.63555	1.78407	1.93337	2.10492	2.29172	2.53685	2.70761	2.9092	3.12849	3.31208	3.45323	3.65478	3.8896	3.98463	4.03361	4.16056	4.16056	4.16056	4.16056	4.16056	4.16056	4.16056	4.16056	4.16056	4.16056	4.16056	4.16056	4.16056	4.16056	4.16056	4.16056	4.16056	4.16056	4.16056	4.16056
932	-0.0423573	0.434956	0.809943	1.03139	1.25145	1.4715	1.65579	1.80554	1.9684	2.10393	2.23377	2.37155	2.45493	2.56749	2.66475	2.74477	2.83713	2.98048	3.07547	3.1434	3.19688	3.31299	3.37355	3.55617	3.6486	3.91622	4.03193	4.12381	4.12381	4.12381	4.12381	4.12381	4.12381	4.12381	4.12381	4.12381	4.12381	4.12381	4.12381	4.12381	4.12381
933	-1.57162	-0.852235	-0.517976	-0.0142713	1.01556	1.29607	1.54103	1.75085	1.92022	2.07301	2.21727	2.37641	2.47157	2.57711	2.73064	2.91052	3.04075	3.12616	3.41608	3.53719	3.65602	3.75047	3.83668	3.85883	3.85883	3.85883	3.85883	3.85883	3.85883	3.85883	3.85883	3.85883	3.85883	3.85883	3.85883	3.85883	3.85883	3.85883	3.85883	3.85883	3.85883
934	-1.31999	-0.956644	-0.348632	0.0120425	0.365395	0.552799	0.82483	0.976559	1.09862	1.23853	1.50145	1.68233	1.84618	1.93648	2.05437	2.17973	2.30922	2.40077	2.5699	2.67473	2.82776	2.99513	3.1373	3.23286	3.31761	3.42828	3.52004	3.59594	3.66223	3.7763	3.81561	3.8576	3.88657	3.88657	3.88657	3.88657	3.88657	3.88657	3.88657	3.88657	3.88657
935	-1.52003	0.332051	0.586042	0.850932	1.08618	1.3485	1.51705	1.64513	1.80826	1.91717	2.02494	2.15768	2.28217	2.41234	2.54928	2.65373	2.77011	2.82652	2.90327	2.96191	3.00584	3.07206	3.16537	3.20332	3.34525	3.39021	3.41057	3.42269	3.50138	3.64707	3.66743	3.71063	3.71063	3.71063	3.71063	3.71063	3.71063	3.71063	3.71063	3.71063	3.71063
936	-0.0706393	0.51591	0.873876	1.20761	1.52645	1.81786	1.97409	2.1588	2.29084	2.40416	2.5045	2.77818	2.86591	2.94776	3.13629	3.19848	3.28612	3.35536	3.39662	3.43935	3.51593	3.55259	3.6302	3.65356	3.67022	3.67022	3.67022	3.67022	3.67022	3.67022	3.67022	3.67022	3.67022	3.67022	3.67022	3.67022	3.67022	3.67022	3.67022	3.67022	3.67022
937	-1.26691	0.564546	0.992971	1.18367	1.41528	1.65373	1.90781	2.04141	2.1492	2.28912	2.37451	2.44648	2.54481	2.67624	2.82213	2.89623	2.95312	3.05082	3.0885	3.12317	3.19065	3.29676	3.44121	3.50242	3.54398	3.59694	3.6204	3.63781	3.64636	3.66755	3.66755	3.66755	3.66755	3.66755	3.66755	3.66755	3.66755	3.66755	3.66755	3.66755	3.66755
938	-0.0296444	0.349695	0.687365	0.958798	1.20407	1.5324	1.69799	1.84781	1.99044	2.32071	2.43151	2.56312	2.73426	2.87984	2.9948	3.10985	3.1853	3.27265	3.37291	3.44706	3.50928	3.56923	3.60107	3.67753	3.74727	3.78554	3.93317	4.01409	4.1063	4.16859	4.16859	4.16859	4.16859	4.16859	4.16859	4.16859	4.16859	4.16859	4.16859	4.16859	4.16859
939	-1.35651	-0.795469	-0.0768987	0.224276	0.455459	0.648203	0.804976	0.961929	1.07501	1.17068	1.2631	1.38343	1.46848	1.55076	1.669	1.82232	1.93311	2.04557	2.23951	2.58836	2.71849	2.82384	2.90796	2.99383	3.0456	3.08539	3.13976	3.16531	3.23041	3.25317	3.37595	3.39855	3.58405	3.60337	3.60396	3.6502	3.6502	3.6502	3.6502	3.6502	3.6502
940	-1.17274	0.665678	1.02225	1.20766	1.43712	1.62525	1.84826	2.04647	2.21632	2.3882	2.51017	2.63926	2.75691	2.85003	2.97719	3.08857	3.22521	3.30935	3.34208	3.40335	3.51589	3.56993	3.60307	3.65559	3.65559	3.65559	3.65559	3.65559	3.65559	3.65559	3.65559	3.65559	3.65559	3.65559	3.65559	3.65559	3.65559	3.65559	3.65559	3.65559	3.65559
941	0.322207	0.634356	0.796968	0.926029	1.04798	1.21944	1.4761	1.73522	1.85917	1.9711	2.04947	2.13478	2.21469	2.31115	2.56834	2.66503	2.77037	2.83694	3.09709	3.31556	3.33448	3.34592	3.36754	3.44613	3.4732	3.47644	3.47644	3.47644	3.47644	3.47644	3.47644	3.47644	3.47644	3.47644	3.47644	3.47644	3.47644	3.47644	3.47644	3.47644	3.47644
942	0.588142	0.795117	1.04458	1.25322	1.45306	1.66749	1.82434	2.0108	2.17476	2.34117	2.45609	2.5578	2.63634	2.83326	2.97214	3.17436	3.22486	3.27298	3.35222	3.41399	3.49334	3.58923	3.62452	3.7266	3.77562	3.92058	3.95214	3.97946	4.03348	4.07264	4.08817	4.09575	4.09575	4.09575	4.09575	4.09575	4.09575	4.09575	4.09575	4.09575	4.09575
943	0.655734	0.933734	1.23922	1.51254	1.76635	1.98203	2.18673	2.38671	2.57071	2.85356	3.00156	3.16069	3.31972	3.46132	3.58651	3.70659	3.80161	3.87351	3.89516	3.91601	3.9353	3.97662	4.10943	4.15054	4.17135	4.17135	4.17135	4.17135	4.17135	4.17135	4.17135	4.17135	4.17135	4.17135	4.17135	4.17135	4.17135	4.17135	4.17135	4.17135	4.17135
944	-0.324128	0.65093	0.812795	0.9464	1.06632	1.16402	1.21751	1.26389	1.31583	1.34869	1.41986	1.52065	1.64186	1.91968	2.05102	2.17526	2.3113	2.42062	2.51616	2.56583	2.74462	2.87315	3.01778	3.10555	3.15635	3.2277	3.25322	3.3311	3.33515	3.41165	3.58358	3.58358	3.58358	3.58358	3.58358	3.58358	3.58358	3.58358	3.58358	3.58358	3.58358
945	-1.30403	-1.22661	-0.665925	0.28704	0.717959	0.977225	1.2174	1.40378	1.565	1.72567	1.88438	2.09342	2.2843	2.43416	2.57622	2.68541	2.87108	2.96669	3.04684	3.08994	3.101	3.20997	3.2557	3.2557	3.2557	3.2557	3.2557	3.2557	3.2557	3.2557	3.2557	3.2557	3.2557	3.2557	3.2557	3.2557	3.2557	3.2557	3.2557	3.2557	3.2557
946	-0.509718	0.0619532	0.332755	0.658722	0.926193	1.14399	1.33212	1.48256	1.6243	1.8112	1.949	2.10485	2.26128	2.37309	2.42744	2.61614	2.6926	2.75967	2.80502	2.8428	2.88687	2.92234	3.00237	3.04329	3.36002	3.45823	3.8345	3.89762	3.96412	4.02049	4.04174	4.04174	4.04174	4.04174	4.04174	4.04174	4.04174	4.04174	4.04174	4.04174	4.04174
947	-1.27487	-0.457452	0.104948	0.396253	0.663368	0.895239	1.05382	1.26315	1.41684	1.56811	1.71896	1.86741	1.99598	2.13019	2.32445	2.49559	2.67611	2.80586	2.91796	3.0647	3.2024	3.28204	3.35798	3.42181	3.50129	3.68956	3.74219	3.79646	3.82546	3.82546	3.82546	3.82546	3.82546	3.82546	3.82546	3.82546	3.82546	3.82546	3.82546	3.82546	3.82546
948	-1.41523	-0.507057	-0.0257707	0.314142	0.567535	0.755296	0.933473	1.10252	1.41873	1.6123	1.71829	1.81295	1.89736	1.99412	2.07694	2.15804	2.20062	2.33314	2.52238	2.66282	2.92943	3.04037	3.20747	3.32564	3.45524	3.54699	3.77523	3.80885	3.89488	3.95372	3.97095	3.97159	3.97159	3.97159	3.97159	3.97159	3.97159	3.97159	3.97159	3.97159	3.97159
949	-0.183579	0.644182	1.02049	1.29797	1.63219	1.87299	2.18176	2.41519	2.65183	2.88442	3.01675	3.14669	3.25214	3.34872	3.50397	3.70577	3.8629	3.90027	3.98466	4.08474	4.13944	4.15462	4.24843	4.24843	4.24843	4.24843	4.24843	4.24843	4.24843	4.24843	4.24843	4.24843	4.24843	4.24843	4.24843	4.24843	4.24843	4.24843	4.24843	4.24843	4.24843
950	0.348129	0.76599	1.11213	1.31194	1.50294	1.67063	1.81442	1.97078	2.10433	2.23921	2.38524	2.48079	2.61195	2.73309	2.88316	2.97824	3.08843	3.22845	3.27689	3.38927	3.50917	3.65057	3.97161	4.03621	4.08923	4.08923	4.08923	4.08923	4.08923	4.08923	4.08923	4.08923	4.08923	4.08923	4.08923	4.08923	4.08923	4.08923	4.08923	4.08923	4.08923
951	-0.344293	0.207661	0.592406	0.784289	0.939677	1.06389	1.16292	1.2609	1.34979	1.53777	1.85147	2.14169	2.3081	2.40603	2.56368	2.81423	2.91244	3.13465	3.30357	3.4124	3.4903	3.61843	3.7219	3.86377	3.95237	3.98271	4.0095	4.08982	4.08982	4.08982	4.08982	4.08982	4.08982	4.08982	4.08982	4.08982	4.08982	4.08982	4.08982	4.08982	4.08982
952	0.250489	0.707042	0.8876	1.04295	1.18355	1.35748	1.51694	1.66442	1.81584	1.9426	2.0598	2.17586	2.29045	2.4001	2.53294	2.64801	2.75653	2.84461	2.91532	2.97009	3.01375	3.05532	3.22244	3.26083	3.36981	3.43571	3.52862	3.71882	3.75744	3.79331	3.79331	3.79331	3.79331	3.79331	3.79331	3.79331	3.79331	3.79331	3.79331	3.79331	3.79331
953	-0.515873	0.569863	0.911322	1.14319	1.40109	1.61714	1.77254	1.88572	2.02215	2.14427	2.28149	2.42454	2.71654	2.81918	2.93321	3.05389	3.17872	3.26083	3.44869	3.50821	3.53843	3.56132	3.65164	3.71683	3.72371	3.83358	3.83988	3.85845	3.88765	3.89308	3.89308	3.89308	3.89308	3.89308	3.89308	3.89308	3.89308	3.89308	3.89308	3.89308	3.89308
954	-1.18623	0.514104	0.923469	1.29075	1.55498	1.72533	2.04031	2.20425	2.35357	2.50804	2.69501	2.84048	2.96811	3.0714	3.19202	3.31841	3.40122	3.44938	3.50984	3.54776	3.59035	3.59901	3.60203	3.62559	3.68879	3.68879	3.68879	3.68879	3.68879	3.68879	3.68879	3.68879	3.68879	3.68879	3.68879	3.68879	3.68879	3.68879	3.68879	3.68879	3.68879
955	0.119017	0.913727	1.19735	1.43751	1.65923	1.8454	2.13365	2.30827	2.45721	2.66677	2.81282	2.91538	3.01818	3.14788	3.24483	3.35596	3.49954	3.57435	3.67625	3.74973	3.82512	3.95697	3.98864	4.00449	4.09223	4.30174	4.30348	4.35879	4.38302	4.38302	4.38302	4.38302	4.38302	4.38302	4.38302	4.38302	4.38302	4.38302	4.38302	4.38302	4.38302
956	0.756789	1.17376	1.37536	1.50157	1.61256	1.73878	1.88979	2.10148	2.27325	2.43069	2.55154	2.6315	2.76924	2.88948	3.0496	3.16824	3.24151	3.39901	3.46444	3.53889	3.5801	3.60003	3.60052	3.61026	3.62188	3.62188	3.62188	3.62188	3.62188	3.62188	3.62188	3.62188	3.62188	3.62188	3.62188	3.62188	3.62188	3.62188	3.62188	3.62188	3.62188
957	-1.20153	-0.244924	0.375171	0.68705	0.998301	1.21777	1.4264	1.5843	1.75199	1.89507	2.02333	2.15204	2.26263	2.43196	2.57129	2.64871	2.73073	2.8255	2.88037	2.95941	3.06866	3.12141	3.15885	3.24862	3.32683	3.38947	3.45708	3.49225	3.51241	3.54054	3.57081	3.62439	3.64855	3.67434	3.67434	3.67434	3.67434	3.67434	3.67434	3.67434	3.67434
958	0.25537	0.571892	0.901838	1.18698	1.454	1.65032	1.86083	2.03739	2.17012	2.33071	2.5028	2.65573	2.83311	3.0269	3.11175	3.2286	3.30978	3.36247	3.41893	3.47065	3.50127	3.53179	3.56116	3.63056	3.67118	3.73564	3.77689	3.79514	3.94192	3.94192	3.94192	3.94192	3.94192	3.94192	3.94192	3.94192	3.94192	3.94192	3.94192	3.94192	3.94192
959	-1.42884	-0.55988	1.31089	1.52301	1.73214	1.86035	2.03607	2.22543	2.32945	2.42681	2.6913	2.78232	2.90704	3.00315	3.13589	3.2267	3.3958	3.46877	3.51604	3.58439	3.66837	3.78376	3.83019	3.85595	3.88062	3.95647	3.95647	3.95647	3.95647	3.95647	3.95647	3.95647	3.95647	3.95647	3.95647	3.95647	3.95647	3.95647	3.95647	3.95647	3.95647
960	-1.02913	0.673359	1.06058	1.38798	1.66843	1.90385	2.08978	2.29445	2.44126	2.61656	2.75683	2.88776	2.98479	3.32522	3.40934	3.47918	3.50922	3.65001	3.72074	3.76739	3.80509	3.80509	3.80509	3.80509	3.80509	3.80509	3.80509	3.80509	3.80509	3.80509	3.80509	3.80509	3.80509	3.80509	3.80509	3.80509	3.80509	3.80509	3.80509	3.80509	3.80509
961	0.570686	0.941183	1.32031	1.58673	1.82258	2.08056	2.24301	2.37272	2.49796	2.61051	2.80567	3.12732	3.19791	3.28844	3.38974	3.38974	3.38974	3.38974	3.38974	3.38974	3.38974	3.38974	3.38974	3.38974	3.38974	3.38974	3.38974	3.38974	3.38974	3.38974	3.38974	3.38974	3.38974	3.38974	3.38974	3.38974	3.38974	3.38974	3.38974	3.38974	3.38974
962	-1.49621	-0.0133493	0.618009	0.968725	1.20739	1.44593	1.62703	1.91027	2.04352	2.1964	2.37021	2.5086	2.69895	2.80512	2.97656	3.12042	3.21176	3.41471	3.47035	3.51996	3.60733	3.67125	3.71899	3.72513	3.73944	3.76295	3.7653	3.8152	3.8434	3.89648	3.94987	3.95443	4.01101	4.01328	4.01328	4.01328	4.01328	4.01328	4.01328	4.01328	4.01328
963	0.631587	1.02151	1.37245	1.69813	1.87508	2.04556	2.17883	2.30213	2.41417	2.5088	2.62551	2.6757	2.78661	2.94842	3.02725	3.10831	3.13489	3.15155	3.21958	3.28568	3.37318	3.46347	3.60913	3.62717	3.64251	3.64251	3.64251	3.64251	3.64251	3.64251	3.64251	3.64251	3.64251	3.64251	3.64251	3.64251	3.64251	3.64251	3.64251	3.64251	3.64251
964	-0.397729	0.209612	0.581741	0.854491	1.12025	1.32586	1.50291	1.66702	1.82113	2.04801	2.18072	2.31906	2.44641	2.61201	2.69727	2.76292	2.88668	2.96655	3.01526	3.12844	3.25946	3.40902	3.47075	3.55631	3.59699	3.72425	3.7899	3.85426	3.88771	3.9005	3.91546	3.91546	3.91546	3.91546	3.91546	3.91546	3.91546	3.91546	3.91546	3.91546	3.91546
965	-2.03977	-1.38795	0.770806	0.975242	1.31741	1.49288	1.65788	1.78807	1.87025	2.03575	2.15887	2.28223	2.42879	2.63498	2.75714	2.85333	3.03143	3.15951	3.23802	3.33666	3.40714	3.47166	3.48965	3.55831	3.77443	3.86036	3.98567	4.01624	4.07932	4.08822	4.08822	4.08822	4.08822	4.08822	4.08822	4.08822	4.08822	4.08822	4.08822	4.08822	4.08822
966	0.133678	0.581267	1.09157	1.33202	1.57043	1.74273	1.89903	2.10037	2.23497	2.4323	2.53015	2.64491	2.74981	2.99626	3.08853	3.17667	3.22775	3.29368	3.34201	3.49383	3.54191	3.58233	3.63612	3.64775	3.68234	3.73592	3.73592	3.73592	3.73592	3.73592	3.73592	3.73592	3.73592	3.73592	3.73592	3.73592	3.73592	3.73592	3.73592	3.73592	3.73592
967	0.508889	0.759143	1.00275	1.24346	1.45587	1.6637	1.89123	2.08463	2.25224	2.49135	2.60607	2.72065	2.80354	2.97882	3.11444	3.16522	3.22754	3.36122	3.45784	3.59784	3.65371	3.73348	3.75955	3.78461	3.83699	3.83699	3.83699	3.83699	3.83699	3.83699	3.83699	3.83699	3.83699	3.83699	3.83699	3.83699	3.83699	3.83699	3.83699	3.83699	3.83699
968	0.10855	0.357586	0.587355	0.813172	1.0105	1.23941	1.42531	1.56984	1.70415	1.92812	2.07802	2.19209	2.35742	2.50759	2.73844	2.89993	3.0569	3.19014	3.30041	3.45926	3.57991	3.71884	3.83048	3.8823	4.00564	4.25114	4.26424	4.34055	4.36164	4.36164	4.36164	4.36164	4.36164	4.36164	4.36164	4.36164	4.36164	4.36164	4.36164	4.36164	4.36164
969	-0.208886	0.509762	0.765285	1.02503	1.29358	1.54165	1.72281	1.91086	2.0474	2.29419	2.44118	2.54929	2.67777	2.7433	2.82022	2.90124	3.01206	3.10995	3.22016	3.26338	3.36694	3.43887	3.60391	3.79844	3.94153	3.97892	3.99844	4.0074	4.0074	4.0074	4.0074	4.0074	4.0074	4.0074	4.0074	4.0074	4.0074	4.0074	4.0074	4.0074	4.0074
970	-0.208797	0.365022	0.80875	1.08651	1.36529	1.60887	1.92261	2.15888	2.37351	2.52695	2.59304	2.65602	2.82174	2.85637	2.88843	2.99671	3.10218	3.16664	3.28035	3.4569	3.8163	3.87817	3.9154	3.95469	3.96453	3.97005	3.99947	3.99947	3.99947	3.99947	3.99947	3.99947	3.99947	3.99947	3.99947	3.99947	3.99947	3.99947	3.99947	3.99947	3.99947
971	-0.593934	0.122676	0.571238	0.905519	1.20498	1.51427	1.78674	1.96064	2.16125	2.27557	2.3671	2.46218	2.62321	2.73172	2.90322	2.99982	3.16001	3.23181	3.36786	3.4876	3.56866	3.65552	3.70104	3.73177	3.75657	3.78755	3.82042	3.94998	4.00952	4.00952	4.00952	4.00952	4.00952	4.00952	4.00952	4.00952	4.00952	4.00952	4.00952	4.00952	4.00952
972	-0.215191	0.949112	1.23984	1.48661	1.66251	1.87568	2.03769	2.19826	2.3888	2.50226	2.60037	2.73	2.81309	2.89085	2.90258	3.02469	3.08738	3.11884	3.22558	3.38298	3.39852	3.42446	3.45004	3.47191	3.47191	3.47191	3.47191	3.47191	3.47191	3.47191	3.47191	3.47191	3.47191	3.47191	3.47191	3.47191	3.47191	3.47191	3.47191	3.47191	3.47191
973	0.306978	0.691153	1.00938	1.31783	1.63596	1.78099	2.03604	2.23104	2.35689	2.46164	2.6001	2.70479	2.81832	2.95527	3.1902	3.34521	3.50645	3.60497	3.67589	3.80797	3.9321	3.96871	4.04949	4.14489	4.18789	4.33713	4.34924	4.44627	4.48848	4.48848	4.48848	4.48848	4.48848	4.48848	4.48848	4.48848	4.48848	4.48848	4.48848	4.48848	4.48848
974	-1.09224	0.40231	0.667444	0.931823	1.15331	1.46889	1.7219	1.87557	2.03477	2.23865	2.39798	2.54465	2.68906	2.81727	2.95637	3.06087	3.19161	3.28402	3.36749	3.42312	3.4655	3.50197	3.53045	3.55726	3.56086	3.68831	3.68831	3.68831	3.68831	3.68831	3.68831	3.68831	3.68831	3.68831	3.68831	3.68831	3.68831	3.68831	3.68831	3.68831	3.68831
975	0.638566	0.97907	1.24744	1.48926	1.68771	1.88178	2.09437	2.25807	2.41338	2.54878	2.65044	2.89231	3.00575	3.09732	3.21324	3.27527	3.33264	3.41097	3.57617	3.64827	3.68937	3.71764	3.72695	3.82854	3.87926	3.87926	3.87926	3.87926	3.87926	3.87926	3.87926	3.87926	3.87926	3.87926	3.87926	3.87926	3.87926	3.87926	3.87926	3.87926	3.87926
976	0.806796	1.06163	1.30785	1.52051	1.70104	1.8731	2.053	2.23013	2.37667	2.5263	2.66875	2.85282	2.92836	3.01663	3.08905	3.21397	3.26501	3.30871	3.62361	3.68775	3.71088	3.72219	3.72459	3.82576	3.82576	3.82576	3.82576	3.82576	3.82576	3.82576	3.82576	3.82576	3.82576	3.82576	3.82576	3.82576	3.82576	3.82576	3.82576	3.82576	3.82576
977	-1.49252	-1.18144	0.274742	0.8421	1.20801	1.35661	1.48979	1.68612	1.86008	2.01561	2.2068	2.4101	2.57215	2.68451	2.79267	2.88712	2.96109	3.05645	3.12291	3.2286	3.36177	3.48524	3.57829	3.65217	3.73112	3.78271	3.85263	3.88372	4.01775	4.02134	4.02134	4.02134	4.02134	4.02134	4.02134	4.02134	4.02134	4.02134	4.02134	4.02134	4.02134
978	0.658496	0.989129	1.30725	1.53044	1.72407	1.95814	2.1106	2.2501	2.39198	2.55761	2.88864	3.02943	3.12395	3.28989	3.43683	3.57452	3.62657	3.88379	3.91391	3.97049	3.98976	4.01294	4.03086	4.03086	4.03086	4.03086	4.03086	4.03086	4.03086	4.03086	4.03086	4.03086	4.03086	4.03086	4.03086	4.03086	4.03086	4.03086	4.03086	4.03086	4.03086
979	-0.844364	0.441609	0.733855	0.964529	1.22691	1.50901	1.76996	1.9917	2.19004	2.37442	2.51609	2.70746	2.857	3.02072	3.14822	3.26112	3.34369	3.4176	3.48451	3.54067	3.60425	3.72097	3.80041	3.91436	3.94828	4.01176	4.0188	4.0188	4.0188	4.0188	4.0188	4.0188	4.0188	4.0188	4.0188	4.0188	4.0188	4.0188	4.0188	4.0188	4.0188
980	-1.28833	0.679451	0.919755	1.13281	1.32867	1.52458	1.71749	1.89737	2.13424	2.42922	2.59187	2.72891	2.8538	2.99828	3.09936	3.19974	3.30278	3.43232	3.47777	3.51242	3.63608	3.66161	3.78386	3.8164	3.84384	3.85806	3.94325	3.96892	4.00147	4.00147	4.00147	4.00147	4.00147	4.00147	4.00147	4.00147	4.00147	4.00147	4.00147	4.00147	4.00147
981	0.444658	0.871171	1.11232	1.29025	1.46373	1.59713	1.89114	2.0143	2.13109	2.29105	2.46785	2.59552	2.78144	2.92605	3.05893	3.21627	3.33879	3.42614	3.52666	3.64874	3.7227	3.79471	3.88428	3.95226	4.0149	4.05717	4.09231	4.11441	4.19428	4.21886	4.24821	4.24821	4.24821	4.24821	4.24821	4.24821	4.24821	4.24821	4.24821	4.24821	4.24821
982	1.10856	1.35618	1.68776	1.82989	2.06937	2.17443	2.30688	2.41826	2.51236	2.63981	2.7649	2.96735	3.09854	3.19586	3.29073	3.3534	3.52454	3.58443	3.6279	3.64944	3.68145	3.7786	3.81352	3.83814	3.8852	3.90641	3.93939	3.94318	3.94654	3.96265	3.99114	4.04691	4.0484	4.05737	4.05737	4.05737	4.05737	4.05737	4.05737	4.05737	4.05737
983	-1.43892	-0.920213	0.884475	1.06626	1.27195	1.42225	1.58369	1.77584	1.96118	2.11294	2.22993	2.35422	2.45422	2.53251	2.63419	2.69026	2.82612	2.92935	2.9865	3.08181	3.12381	3.23326	3.34006	3.36354	3.44076	3.53705	3.62051	3.63053	3.69106	3.71969	3.74136	3.74136	3.74136	3.74136	3.74136	3.74136	3.74136	3.74136	3.74136	3.74136	3.74136
984	-1.03944	0.0511552	0.493322	1.01852	1.27675	1.44651	1.6484	1.80439	1.94294	2.09204	2.21727	2.31236	2.36902	2.47801	2.74733	2.98291	3.10573	3.22126	3.32316	3.44585	3.50008	3.54014	3.57845	3.59216	3.61033	3.65772	3.7544	3.84288	3.9223	3.95207	3.97324	4.0513	4.15224	4.23443	4.23443	4.23443	4.23443	4.23443	4.23443	4.23443	4.23443
985	-1.40787	0.317491	0.768517	1.15338	1.33903	1.58501	1.8086	1.97022	2.12386	2.27001	2.39469	2.55178	2.66699	2.8431	2.97799	3.11427	3.18294	3.30515	3.39698	3.4913	3.56169	3.59798	3.62275	3.62275	3.62275	3.62275	3.62275	3.62275	3.62275	3.62275	3.62275	3.62275	3.62275	3.62275	3.62275	3.62275	3.62275	3.62275	3.62275	3.62275	3.62275
986	-1.10225	-0.0646062	0.370131	0.584258	0.845245	1.08826	1.35908	1.5689	1.72438	1.89475	2.08894	2.35075	2.53214	2.69798	2.93675	3.03833	3.12312	3.1986	3.26041	3.43372	3.53227	3.5885	3.62464	3.65197	3.72531	3.76602	3.84425	3.89797	3.92612	3.93535	3.93535	3.93535	3.93535	3.93535	3.93535	3.93535	3.93535	3.93535	3.93535	3.93535	3.93535
987	-0.438766	0.220939	0.504533	0.777778	1.04578	1.28559	1.48444	1.65825	1.87805	2.17882	2.33789	2.45314	2.5722	2.68206	2.78966	2.91833	3.08205	3.19564	3.30471	3.3647	3.43082	3.47317	3.50552	3.54268	3.60517	3.68579	3.70584	3.78506	3.85977	3.88019	3.88019	3.88019	3.88019	3.88019	3.88019	3.88019	3.88019	3.88019	3.88019	3.88019	3.88019
988	-1.31364	-0.858219	-0.30399	0.174929	0.514066	0.838554	1.01592	1.18021	1.33082	1.46906	1.59817	1.8237	2.02623	2.19917	2.33503	2.47128	2.59717	2.75768	2.87654	2.93269	2.99871	3.11022	3.17996	3.23304	3.31373	3.33798	3.39337	3.41488	3.45237	3.46957	3.47923	3.4803	3.48128	3.48128	3.48128	3.48128	3.48128	3.48128	3.48128	3.48128	3.48128
989	-1.60769	1.02712	1.31581	1.57146	1.81894	2.01278	2.22003	2.38804	2.55844	2.71435	2.83044	2.91729	3.00573	3.11543	3.33874	3.51131	3.60953	3.75549	3.78387	3.79478	3.82939	3.84423	3.90102	3.95331	4.02457	4.04863	4.05188	4.05188	4.05188	4.05188	4.05188	4.05188	4.05188	4.05188	4.05188	4.05188	4.05188	4.05188	4.05188	4.05188	4.05188
990	-0.904257	-0.0813966	0.483159	0.781852	1.02629	1.26804	1.50726	1.83015	2.08998	2.28321	2.40565	2.57828	2.71369	2.82723	2.91739	3.04027	3.11549	3.32229	3.35452	3.40646	3.50211	3.59202	3.70343	3.76903	3.79771	3.82617	3.95512	4.0094	4.13	4.15805	4.23677	4.33656	4.33656	4.33656	4.33656	4.33656	4.33656	4.33656	4.33656	4.33656	4.33656
991	-0.0351516	0.474317	0.795582	1.07141	1.26548	1.43049	1.56977	1.71872	1.86446	2.05545	2.17434	2.28896	2.60894	2.70403	2.78061	2.8013	2.91013	3.01816	3.18739	3.28792	3.43374	3.53408	3.58619	3.66485	3.7144	3.76381	3.80769	3.84246	3.87319	3.87578	3.87578	3.87578	3.87578	3.87578	3.87578	3.87578	3.87578	3.87578	3.87578	3.87578	3.87578
992	-0.434179	0.260217	0.639032	0.941908	1.20741	1.45881	1.79195	2.11088	2.35146	2.47583	2.57204	2.80009	2.98165	3.1434	3.21852	3.24953	3.33118	3.42673	3.60167	3.65717	3.68515	3.68515	3.68515	3.68515	3.68515	3.68515	3.68515	3.68515	3.68515	3.68515	3.68515	3.68515	3.68515	3.68515	3.68515	3.68515	3.68515	3.68515	3.68515	3.68515	3.68515
993	-1.32776	-0.701318	-0.239343	0.268312	0.645116	0.904801	1.10103	1.28954	1.45674	1.60923	1.81575	1.97136	2.10933	2.23102	2.35002	2.44506	2.6181	2.85267	3.01176	3.13979	3.22434	3.29512	3.34564	3.48458	3.59795	3.69243	3.73807	3.78175	3.84633	3.903	3.90978	3.93576	3.99488	3.99899	4.06126	4.06492	4.11338	4.12305	4.12305	4.12305	4.12305
994	-0.229796	0.158161	0.472601	0.695802	1.05057	1.25042	1.42451	1.66955	1.89394	2.10708	2.2508	2.38251	2.50819	2.5913	2.70099	2.86847	3.01425	3.11858	3.15291	3.18392	3.41432	3.51029	3.56701	3.60388	3.60884	3.73753	3.90268	4.01167	4.07424	4.13073	4.13073	4.13073	4.13073	4.13073	4.13073	4.13073	4.13073	4.13073	4.13073	4.13073	4.13073
995	-1.52455	0.375191	0.787556	1.00071	1.22494	1.41273	1.62474	1.77367	1.95838	2.10094	2.22676	2.45532	2.5902	2.71896	2.88052	2.99678	3.09021	3.15865	3.27838	3.33777	3.44426	3.55796	3.66076	3.71416	3.7533	3.83309	3.83565	3.83565	3.83565	3.83565	3.83565	3.83565	3.83565	3.83565	3.83565	3.83565	3.83565	3.83565	3.83565	3.83565	3.83565
996	-1.31391	-1.0074	-0.309471	0.040619	0.607484	1.00547	1.36537	1.5724	1.72192	1.86632	1.99057	2.16169	2.35594	2.48703	2.61048	2.69355	2.76918	2.86851	2.91356	2.98163	3.05263	3.13869	3.20124	3.25879	3.35205	3.39057	3.39365	3.44256	3.46913	3.53265	3.65894	3.69424	3.79552	3.83773	3.87624	3.87624	3.87624	3.87624	3.87624	3.87624	3.87624
997	-0.808838	0.515532	0.76796	1.04943	1.2541	1.48818	1.85673	2.0405	2.42134	2.5784	2.69391	2.91151	3.03363	3.12754	3.21819	3.38857	3.469	3.5428	3.61275	3.67634	3.83399	3.87713	3.9816	4.05405	4.05405	4.05405	4.05405	4.05405	4.05405	4.05405	4.05405	4.05405	4.05405	4.05405	4.05405	4.05405	4.05405	4.05405	4.05405	4.05405	4.05405
998	-1.20306	0.00535655	0.298983	0.537662	0.82126	1.07194	1.29874	1.46672	1.6121	1.81112	1.95868	2.24772	2.35898	2.48784	2.62565	2.71763	2.79142	2.92016	3.05977	3.24529	3.31704	3.40323	3.4433	3.49122	3.5912	3.62229	3.62229	3.62229	3.62229	3.62229	3.62229	3.62229	3.62229	3.62229	3.62229	3.62229	3.62229	3.62229	3.62229	3.62229	3.62229
999	0.571461	0.87811	1.11665	1.47581	1.70733	1.92514	2.17292	2.475	2.67042	2.84714	3.0036	3.12382	3.18934	3.25164	3.30132	3.43272	3.48526	3.57681	3.64773	3.70163	3.75427	3.8932	3.94696	3.98978	4.04037	4.04037	4.04037	4.04037	4.04037	4.04037	4.04037	4.04037	4.04037	4.04037	4.04037	4.04037	4.04037	4.04037	4.04037	4.04037	4.04037
1000	-1.32614	0.714125	1.00967	1.28125	1.66113	1.89085	2.1119	2.2879	2.4447	2.61507	2.78085	2.92657	3.19505	3.29984	3.37448	3.44138	3.46929	3.51016	3.62076	3.72467	3.82722	3.82722	3.82722	3.82722	3.82722	3.82722	3.82722	3.82722	3.82722	3.82722	3.82722	3.82722	3.82722	3.82722	3.82722	3.82722	3.82722	3.82722	3.82722	3.82722	3.82722
1001	0.622052	0.90004	1.126	1.28371	1.43047	1.59741	1.75487	1.95987	2.16784	2.29141	2.38123	2.52964	2.69463	2.81194	2.92495	3.0891	3.21244	3.27142	3.36644	3.41642	3.49225	3.5322	3.55383	3.66269	3.71959	3.78819	3.85022	3.85558	3.85558	3.85558	3.85558	3.85558	3.85558	3.85558	3.85558	3.85558	3.85558	3.85558	3.85558	3.85558	3.85558
1002	-1.24046	-0.583665	-0.0312725	0.229677	0.49642	0.666229	0.876736	1.05111	1.20103	1.31443	1.42558	1.51667	1.61414	1.70169	1.78911	1.87192	2.10117	2.20456	2.32047	2.43562	2.48254	2.55016	2.63648	2.69775	2.87138	2.9656	3.0314	3.14803	3.24752	3.32441	3.38034	3.45106	3.53953	3.58973	3.638	3.67237	3.70316	3.73337	3.74368	3.74813	3.80186
1003	-0.0753125	0.386231	0.754074	0.990242	1.18533	1.36547	1.57071	1.73811	1.89307	2.04665	2.18737	2.32854	2.46536	2.61302	2.84521	2.9477	3.06135	3.14041	3.22182	3.27883	3.44441	3.5119	3.52039	3.52682	3.55431	3.57357	3.60039	3.64709	3.69014	3.73866	3.79035	3.82858	3.87975	3.91029	3.91029	3.91029	3.91029	3.91029	3.91029	3.91029	3.91029
1004	-1.03612	0.0305877	0.579254	1.16974	1.37619	1.55229	1.72881	1.97242	2.12536	2.25767	2.36345	2.54672	2.65704	2.72442	2.83498	2.8851	2.94128	2.98479	3.08188	3.14851	3.20035	3.23217	3.2633	3.35007	3.40479	3.45651	3.50449	3.52138	3.52138	3.52138	3.52138	3.52138	3.52138	3.52138	3.52138	3.52138	3.52138	3.52138	3.52138	3.52138	3.52138
1005	-1.21966	0.36433	0.683377	1.03362	1.33702	1.5087	1.65785	1.81982	1.9606	2.09188	2.33748	2.56686	2.70668	2.85625	2.96251	3.04132	3.09213	3.18474	3.23016	3.28023	3.32561	3.37242	3.54473	3.6558	3.72759	3.80746	3.83308	3.85255	3.85423	3.85423	3.85423	3.85423	3.85423	3.85423	3.85423	3.85423	3.85423	3.85423	3.85423	3.85423	3.85423
1006	0.315996	0.66829	0.93435	1.20496	1.43953	1.56687	1.72196	1.87799	2.09961	2.25268	2.38994	2.48592	2.57045	2.70448	2.84082	2.92432	3.05344	3.11379	3.22442	3.28372	3.31441	3.36228	3.36605	3.37182	3.47	3.55471	3.61473	3.64019	3.65034	3.67264	3.835	3.86733	3.86733	3.86733	3.86733	3.86733	3.86733	3.86733	3.86733	3.86733	3.86733
1007	1.17939	1.52285	1.80644	2.08062	2.31111	2.53094	2.74202	2.89142	3.0785	3.23132	3.34471	3.42916	3.48383	3.52852	3.6164	3.66027	3.75903	3.79852	3.82103	3.82103	3.82103	3.82103	3.82103	3.82103	3.82103	3.82103	3.82103	3.82103	3.82103	3.82103	3.82103	3.82103	3.82103	3.82103	3.82103	3.82103	3.82103	3.82103	3.82103	3.82103	3.82103
1008	0.533562	0.905888	1.27032	1.51587	1.79061	2.00235	2.23314	2.47853	2.66336	2.84008	2.9367	3.16355	3.27605	3.3383	3.39875	3.46121	3.46121	3.46121	3.46121	3.46121	3.46121	3.46121	3.46121	3.46121	3.46121	3.46121	3.46121	3.46121	3.46121	3.46121	3.46121	3.46121	3.46121	3.46121	3.46121	3.46121	3.46121	3.46121	3.46121	3.46121	3.46121
1009	-1.59342	-1.19308	-0.0650007	0.455728	0.766029	1.04971	1.28953	1.52498	1.75165	1.96124	2.14455	2.32112	2.46361	2.55159	2.73248	2.92057	3.00264	3.0818	3.23628	3.30388	3.35142	3.44372	3.5074	3.52656	3.57261	3.5957	3.6121	3.65706	3.68522	3.70509	3.7509	3.76648	3.76648	3.76648	3.76648	3.76648	3.76648	3.76648	3.76648	3.76648	3.76648
1010	-0.77052	0.328122	0.717551	0.942196	1.16488	1.37157	1.54469	1.77263	1.92983	2.04886	2.21727	2.32038	2.40832	2.48731	2.59834	2.69002	2.91748	2.96976	3.02035	3.05862	3.07469	3.101	3.18605	3.21177	3.27509	3.34692	3.44246	3.44612	3.44909	3.44909	3.44909	3.44909	3.44909	3.44909	3.44909	3.44909	3.44909	3.44909	3.44909	3.44909	3.44909
1011	-1.54386	0.164432	1.37145	1.71616	1.97462	2.22314	2.39101	2.60332	2.73135	2.84693	3.00802	3.09866	3.41256	3.47146	3.53231	3.59267	3.62017	3.66597	3.69302	3.69302	3.69302	3.69302	3.69302	3.69302	3.69302	3.69302	3.69302	3.69302	3.69302	3.69302	3.69302	3.69302	3.69302	3.69302	3.69302	3.69302	3.69302	3.69302	3.69302	3.69302	3.69302
1012	0.442364	0.765109	1.04688	1.26898	1.51875	1.69348	2.01645	2.17309	2.29899	2.42437	2.61426	2.74852	2.86644	2.99781	3.11368	3.28694	3.38521	3.50285	3.64629	3.72923	3.81971	3.90773	3.90773	3.90773	3.90773	3.90773	3.90773	3.90773	3.90773	3.90773	3.90773	3.90773	3.90773	3.90773	3.90773	3.90773	3.90773	3.90773	3.90773	3.90773	3.90773
1013	-0.967041	-0.362783	0.141917	0.512201	0.692876	0.940613	1.07481	1.31664	1.42335	1.52075	1.63855	1.72144	1.8422	1.94761	2.00244	2.14501	2.21602	2.30678	2.34522	2.46116	2.53296	2.67225	2.70093	2.74493	2.80005	2.8207	2.98278	3.02629	3.03564	3.13546	3.16233	3.16233	3.16233	3.16233	3.16233	3.16233	3.16233	3.16233	3.16233	3.16233	3.16233
1014	-1.00716	0.82046	0.998931	1.2273	1.41613	1.61384	1.81282	1.94805	2.07944	2.23016	2.41127	2.53285	2.63555	2.739	2.84026	2.98795	3.13265	3.22192	3.2852	3.38747	3.46259	3.52101	3.66757	3.77602	3.81639	3.84017	3.84017	3.84017	3.84017	3.84017	3.84017	3.84017	3.84017	3.84017	3.84017	3.84017	3.84017	3.84017	3.84017	3.84017	3.84017
1015	-1.49894	-1.18956	-0.719112	0.709016	0.940509	1.1276	1.36862	1.58337	1.74834	1.95427	2.14521	2.3317	2.44506	2.59231	2.71708	2.83192	2.95507	3.04171	3.11412	3.18746	3.30561	3.38371	3.62198	3.68743	3.73442	3.83478	3.91677	4.07637	4.07637	4.07637	4.07637	4.07637	4.07637	4.07637	4.07637	4.07637	4.07637	4.07637	4.07637	4.07637	4.07637
1016	-1.70108	-0.000386059	0.529757	0.770472	0.988312	1.17861	1.3223	1.45983	1.65677	1.8109	1.93337	2.11171	2.22895	2.35169	2.46879	2.53972	2.63768	2.80562	2.91476	2.98425	3.06978	3.13527	3.21268	3.28104	3.38686	3.47583	3.56023	3.62987	3.67129	3.69294	3.69294	3.69294	3.69294	3.69294	3.69294	3.69294	3.69294	3.69294	3.69294	3.69294	3.69294
1017	0.204073	0.635847	1.02042	1.22662	1.42342	1.61821	1.81755	1.94198	2.10986	2.22665	2.30252	2.38763	2.51754	2.59971	2.71064	2.85254	2.90924	2.99658	3.10792	3.25574	3.2857	3.33076	3.47722	3.48204	3.49295	3.50595	3.55565	3.58786	3.60715	3.65229	3.7589	3.78219	3.83007	3.83007	3.83007	3.83007	3.83007	3.83007	3.83007	3.83007	3.83007
1018	-1.26724	0.940355	1.1785	1.40929	1.63925	1.80629	1.95413	2.11184	2.28609	2.41445	2.60172	2.72311	2.81634	2.95488	3.05022	3.23025	3.24916	3.29013	3.31818	3.50524	3.5418	3.7105	3.752	3.88683	3.99534	3.99534	3.99534	3.99534	3.99534	3.99534	3.99534	3.99534	3.99534	3.99534	3.99534	3.99534	3.99534	3.99534	3.99534	3.99534	3.99534
1019	-1.0558	-0.314498	0.129354	0.420845	0.569643	0.777869	0.931618	1.11513	1.46186	1.56207	1.69558	1.79767	1.90379	2.06714	2.2095	2.30483	2.40587	2.56082	2.70315	2.84183	3.01375	3.06395	3.08882	3.20103	3.35985	3.51827	3.61211	3.63113	3.64892	3.64892	3.64892	3.64892	3.64892	3.64892	3.64892	3.64892	3.64892	3.64892	3.64892	3.64892	3.64892
1020	-1.50455	-0.0116161	1.04635	1.4985	1.72844	2.00889	2.22432	2.40898	2.52282	2.6399	2.73882	2.95026	3.07035	3.14038	3.30258	3.38897	3.60154	3.77703	3.89283	3.97867	4.10853	4.18234	4.20507	4.20507	4.20507	4.20507	4.20507	4.20507	4.20507	4.20507	4.20507	4.20507	4.20507	4.20507	4.20507	4.20507	4.20507	4.20507	4.20507	4.20507	4.20507
1021	0.191607	0.479437	0.774453	1.00082	1.20538	1.39071	1.58385	1.73453	1.93645	2.09413	2.23218	2.36072	2.55506	2.70387	2.80876	2.90219	2.96392	3.10599	3.20692	3.25501	3.31983	3.37426	3.42384	3.46002	3.4746	3.55306	3.55679	3.6188	3.69042	3.72899	3.72899	3.72899	3.72899	3.72899	3.72899	3.72899	3.72899	3.72899	3.72899	3.72899	3.72899
1022	0.0883088	0.396461	0.647574	0.899272	1.12922	1.32623	1.48627	1.61619	1.74797	1.91145	2.05075	2.21452	2.346	2.47117	2.59069	2.70581	2.79057	2.85187	2.93467	3.047	3.11735	3.20518	3.26333	3.35528	3.38105	3.39183	3.39183	3.39183	3.39183	3.39183	3.39183	3.39183	3.39183	3.39183	3.39183	3.39183	3.39183	3.39183	3.39183	3.39183	3.39183
1023	-0.281754	0.289386	0.713407	1.06657	1.39928	1.58204	1.73569	1.92545	2.06472	2.15507	2.23606	2.32289	2.38662	2.61249	2.67216	2.72083	2.85548	2.9044	2.98717	3.02779	3.08564	3.18735	3.3698	3.5605	3.74577	3.81261	3.94297	4.02617	4.03912	4.06291	4.06291	4.06291	4.06291	4.06291	4.06291	4.06291	4.06291	4.06291	4.06291	4.06291	4.06291
1024	0.319261	0.60054	0.886521	1.10742	1.41705	1.69227	1.99442	2.14825	2.30244	2.45192	2.58293	2.66874	2.73895	2.95598	3.0475	3.0917	3.19619	3.34951	3.49989	3.56473	3.59413	3.6209	3.66324	3.70548	3.73557	3.93042	3.93042	3.93042	3.93042	3.93042	3.93042	3.93042	3.93042	3.93042	3.93042	3.93042	3.93042	3.93042	3.93042	3.93042	3.93042
1025	-1.51779	0.552792	0.771312	0.982939	1.18384	1.42574	1.62501	1.80204	1.9843	2.25784	2.43649	2.60927	2.77429	2.96659	3.1356	3.24292	3.29859	3.34049	3.45012	3.48522	3.51804	3.53258	3.55445	3.56584	3.65298	3.66002	3.71304	3.80243	3.86326	3.92592	3.92947	3.92947	3.92947	3.92947	3.92947	3.92947	3.92947	3.92947	3.92947	3.92947	3.92947
1026	-0.792345	-0.0817783	0.267859	0.478425	0.894216	1.15411	1.32641	1.51452	1.66728	1.78002	1.91025	2.06464	2.18588	2.33158	2.51655	2.64845	2.75135	2.85731	2.92006	2.97605	3.05165	3.12614	3.17408	3.28055	3.3254	3.35031	3.39173	3.47736	3.51644	3.58115	3.653	3.65838	3.65838	3.65838	3.65838	3.65838	3.65838	3.65838	3.65838	3.65838	3.65838
1027	-0.956355	0.485865	0.813581	1.04157	1.27466	1.4592	1.64513	1.8476	2.07213	2.25492	2.44901	2.57242	2.68877	2.80039	2.90127	2.99464	3.08133	3.19182	3.2872	3.36098	3.44774	3.5155	3.58482	3.6679	3.72718	3.77996	3.84291	3.87527	3.90354	3.94886	3.97597	3.99793	3.99793	3.99793	3.99793	3.99793	3.99793	3.99793	3.99793	3.99793	3.99793
1028	1.01795	1.30259	1.62193	1.9018	2.24279	2.46605	2.63921	2.80453	2.9945	3.15631	3.26588	3.42471	3.56876	3.62483	3.67769	3.79689	3.87755	3.95423	3.9988	4.10753	4.17492	4.18154	4.18154	4.18154	4.18154	4.18154	4.18154	4.18154	4.18154	4.18154	4.18154	4.18154	4.18154	4.18154	4.18154	4.18154	4.18154	4.18154	4.18154	4.18154	4.18154
1029	0.171169	0.53808	0.853176	1.10916	1.40016	1.62306	1.82864	1.9881	2.12416	2.22746	2.3609	2.5723	2.72257	2.90409	2.95155	2.98858	3.14645	3.25	3.26417	3.29247	3.29247	3.29247	3.29247	3.29247	3.29247	3.29247	3.29247	3.29247	3.29247	3.29247	3.29247	3.29247	3.29247	3.29247	3.29247	3.29247	3.29247	3.29247	3.29247	3.29247	3.29247
1030	-1.03239	-0.294025	0.445976	0.682637	0.917113	1.07944	1.27562	1.44806	1.61701	1.767	1.90438	2.02163	2.12842	2.27145	2.35852	2.51416	2.60876	2.67413	2.8664	2.98613	3.09777	3.2056	3.24093	3.26549	3.28087	3.30149	3.37268	3.42178	3.44077	3.65221	3.75647	3.75647	3.75647	3.75647	3.75647	3.75647	3.75647	3.75647	3.75647	3.75647	3.75647
1031	-1.49995	0.699427	1.04084	1.33094	1.5715	1.78039	1.99573	2.22601	2.50943	2.67842	2.93153	3.10815	3.25029	3.38859	3.5325	3.63514	3.78688	3.85463	3.90078	3.93406	3.97435	4.00388	4.03788	4.03788	4.03788	4.03788	4.03788	4.03788	4.03788	4.03788	4.03788	4.03788	4.03788	4.03788	4.03788	4.03788	4.03788	4.03788	4.03788	4.03788	4.03788
1032	-1.06551	-0.174419	0.525818	1.00264	1.21706	1.43058	1.5904	1.82952	1.98946	2.15535	2.46508	2.6092	2.82467	2.91266	3.02961	3.1617	3.31339	3.49744	3.53456	3.62389	3.64957	3.64957	3.64957	3.64957	3.64957	3.64957	3.64957	3.64957	3.64957	3.64957	3.64957	3.64957	3.64957	3.64957	3.64957	3.64957	3.64957	3.64957	3.64957	3.64957	3.64957
1033	-1.20525	0.0689405	0.495014	0.739896	0.949519	1.14828	1.38272	1.57344	1.79556	2.06573	2.22636	2.39973	2.58534	2.72841	2.85212	3.01642	3.14623	3.24556	3.36029	3.42775	3.44222	3.44261	3.61254	3.85859	3.86382	4.00661	4.0797	4.08577	4.12897	4.12897	4.12897	4.12897	4.12897	4.12897	4.12897	4.12897	4.12897	4.12897	4.12897	4.12897	4.12897
1034	-1.4384	0.799042	1.04916	1.26755	1.47529	1.64173	1.85718	2.05507	2.36157	2.68164	2.91014	3.07872	3.23057	3.45199	3.56928	3.67051	3.76825	3.91499	3.98006	4.02328	4.05211	4.17845	4.24632	4.46236	4.52442	4.54799	4.54799	4.54799	4.54799	4.54799	4.54799	4.54799	4.54799	4.54799	4.54799	4.54799	4.54799	4.54799	4.54799	4.54799	4.54799
1035	-1.5828	0.431168	0.762394	1.09991	1.37952	1.62205	1.89829	2.12007	2.31539	2.47973	2.63427	2.78214	2.89955	2.99858	3.08834	3.20558	3.33584	3.44851	3.52447	3.59033	3.64692	3.69909	3.84319	3.92873	4.00279	4.04701	4.05743	4.13578	4.19519	4.20515	4.21959	4.21959	4.21959	4.21959	4.21959	4.21959	4.21959	4.21959	4.21959	4.21959	4.21959
1036	-0.621347	-0.202367	0.284622	0.610322	0.826037	1.03729	1.19478	1.35481	1.57629	1.73868	1.93754	2.09348	2.24173	2.55631	2.73029	2.91782	3.04692	3.22285	3.46447	3.53775	3.61	3.7296	3.82866	3.89908	3.93924	3.96441	4.06368	4.18416	4.21161	4.22339	4.22339	4.22339	4.22339	4.22339	4.22339	4.22339	4.22339	4.22339	4.22339	4.22339	4.22339
1037	-1.25378	-0.22994	0.289544	0.653943	1.0106	1.50543	1.81919	2.05105	2.26031	2.39094	2.53029	2.66019	2.77595	2.87062	2.94359	3.0085	3.16558	3.24765	3.44029	3.70236	3.77215	3.80709	3.89018	3.94045	3.98567	4.04211	4.05098	4.0834	4.09994	4.10221	4.10221	4.10221	4.10221	4.10221	4.10221	4.10221	4.10221	4.10221	4.10221	4.10221	4.10221
1038	-0.834268	-0.0815644	0.334715	0.558469	0.776469	1.1051	1.41538	1.62607	1.79898	1.96371	2.12571	2.25274	2.39303	2.4888	2.66413	2.81652	2.99356	3.08243	3.17062	3.36087	3.60803	3.67823	3.91932	3.97382	4.06467	4.09104	4.19442	4.19442	4.19442	4.19442	4.19442	4.19442	4.19442	4.19442	4.19442	4.19442	4.19442	4.19442	4.19442	4.19442	4.19442
1039	0.412314	0.900245	1.19787	1.43762	1.65659	1.79536	1.9159	2.03423	2.15757	2.28682	2.43912	2.52402	2.59743	2.67209	2.78568	2.83758	2.98415	3.02679	3.06163	3.12822	3.26048	3.31858	3.38463	3.43276	3.46797	3.58648	3.68684	3.79582	3.89013	3.93668	4.00179	4.009	4.01482	4.01482	4.01482	4.01482	4.01482	4.01482	4.01482	4.01482	4.01482
1040	1.4583	1.84164	2.10421	2.36249	2.54933	2.7427	2.86213	2.97462	3.06461	3.31943	3.41924	3.5036	3.57098	3.58681	3.60588	3.61307	3.63614	3.69901	3.73227	3.7523	3.77077	3.80127	3.85421	3.86554	3.93655	3.95729	3.97991	4.02138	4.02646	4.02646	4.02646	4.02646	4.02646	4.02646	4.02646	4.02646	4.02646	4.02646	4.02646	4.02646	4.02646
1041	0.285317	0.605677	0.956592	1.2883	1.61993	1.88024	2.06722	2.24068	2.34945	2.62953	2.73793	2.82456	2.95611	3.03435	3.15602	3.24998	3.30507	3.3446	3.4662	3.59285	3.62069	3.65154	3.68353	3.6894	3.6894	3.6894	3.6894	3.6894	3.6894	3.6894	3.6894	3.6894	3.6894	3.6894	3.6894	3.6894	3.6894	3.6894	3.6894	3.6894	3.6894
1042	0.0588127	0.57508	0.98026	1.16911	1.34072	1.49382	1.656	1.79906	1.92313	2.04338	2.1839	2.28765	2.49696	2.65626	2.81944	2.93634	3.03186	3.11371	3.23823	3.31385	3.40954	3.46634	3.51581	3.57602	3.62604	3.69584	3.7441	3.76677	3.76894	3.77144	3.77144	3.77144	3.77144	3.77144	3.77144	3.77144	3.77144	3.77144	3.77144	3.77144	3.77144
1043	-1.39202	-0.291791	0.452075	0.938077	1.14887	1.35053	1.58507	1.79388	1.99123	2.12035	2.22892	2.33434	2.43502	2.66376	2.97378	3.17807	3.2588	3.30517	3.33786	3.36642	3.38382	3.54524	3.60288	3.62971	3.66849	3.7707	3.78813	3.79664	3.79664	3.79664	3.79664	3.79664	3.79664	3.79664	3.79664	3.79664	3.79664	3.79664	3.79664	3.79664	3.79664
1044	-1.5083	0.393998	0.692886	0.925946	1.09141	1.41253	1.59021	1.74966	1.88551	2.14408	2.24129	2.3777	2.50607	2.58752	2.66701	2.78569	2.84847	2.9251	3.03713	3.21128	3.32486	3.38511	3.43099	3.66617	3.71287	3.76017	3.79539	3.82817	3.82817	3.82817	3.82817	3.82817	3.82817	3.82817	3.82817	3.82817	3.82817	3.82817	3.82817	3.82817	3.82817
1045	-0.722287	-0.410569	-0.0817863	0.130045	0.313209	0.492704	0.627703	0.968737	1.14148	1.30063	1.44516	1.63739	1.86773	2.02851	2.1789	2.36445	2.48035	2.57943	2.68251	2.76789	2.84935	2.97336	3.10426	3.13276	3.34535	3.38273	3.40047	3.44764	3.55941	3.64885	3.67982	3.75823	3.84824	3.87014	3.8917	3.94314	3.98021	4.01041	4.01041	4.01041	4.01041
1046	-1.38248	0.80856	1.11695	1.29633	1.47912	1.78174	1.96953	2.1606	2.32219	2.43381	2.57655	2.67155	2.76453	2.86076	2.94917	3.04231	3.17386	3.23009	3.31411	3.35626	3.43007	3.45158	3.67529	3.81782	3.88611	3.93729	4.02124	4.06545	4.10306	4.18494	4.21458	4.23703	4.23703	4.23703	4.23703	4.23703	4.23703	4.23703	4.23703	4.23703	4.23703
1047	-1.40963	-0.259048	0.10409	0.284228	0.472914	0.78732	0.996218	1.27184	1.45195	1.66578	1.82211	1.94162	2.06634	2.16968	2.27223	2.35945	2.45351	2.56673	2.70061	2.76549	2.82663	2.89125	3.02033	3.19393	3.26041	3.3152	3.3914	3.47891	3.49361	3.72969	3.73195	3.73195	3.73195	3.73195	3.73195	3.73195	3.73195	3.73195	3.73195	3.73195	3.73195
1048	-1.35113	-0.869861	-0.193894	0.375248	0.754424	1.06744	1.34897	1.59705	1.85929	2.04359	2.21913	2.38714	2.54454	2.69902	2.82446	2.93783	3.17592	3.29992	3.44742	3.55458	3.63806	3.71823	3.78611	3.85248	3.8723	3.94546	4.01938	4.01938	4.01938	4.01938	4.01938	4.01938	4.01938	4.01938	4.01938	4.01938	4.01938	4.01938	4.01938	4.01938	4.01938
1049	-1.70448	-1.3124	0.28054	0.709737	1.01653	1.23116	1.3898	1.81825	2.02379	2.13767	2.23874	2.3815	2.512	2.71356	2.85487	3.026	3.13874	3.21746	3.29378	3.3518	3.40463	3.53629	3.55649	3.55694	3.55694	3.55694	3.55694	3.55694	3.55694	3.55694	3.55694	3.55694	3.55694	3.55694	3.55694	3.55694	3.55694	3.55694	3.55694	3.55694	3.55694
1050	0.622706	0.87662	1.08169	1.26628	1.49094	1.66437	1.80337	1.9383	2.1993	2.55183	2.68151	2.78549	2.89343	2.98737	3.0697	3.15577	3.22047	3.28745	3.34596	3.42925	3.45063	3.54223	3.55231	3.58025	3.61134	3.68074	3.71088	3.74181	3.74181	3.74181	3.74181	3.74181	3.74181	3.74181	3.74181	3.74181	3.74181	3.74181	3.74181	3.74181	3.74181
1051	-1.60279	-1.09049	-0.256707	0.48929	0.77224	1.06967	1.34894	1.58522	1.7095	1.8251	2.04633	2.20391	2.30851	2.40897	2.46779	2.64072	2.767	2.84185	2.96648	3.02463	3.1327	3.1948	3.27179	3.30927	3.3312	3.41282	3.48307	3.6149	3.64667	3.64667	3.64667	3.64667	3.64667	3.64667	3.64667	3.64667	3.64667	3.64667	3.64667	3.64667	3.64667
1052	0.0927113	0.692009	1.03104	1.24118	1.38647	1.49228	1.58832	1.70738	1.88488	2.16216	2.33402	2.43437	2.52833	2.62409	2.70765	2.8916	2.95851	3.19962	3.26822	3.30042	3.32767	3.43831	3.57122	3.60159	3.64465	3.66547	3.6911	3.69908	3.69908	3.69908	3.69908	3.69908	3.69908	3.69908	3.69908	3.69908	3.69908	3.69908	3.69908	3.69908	3.69908
1053	0.844442	1.0885	1.30316	1.48118	1.64013	1.75805	1.90124	2.04781	2.24615	2.47088	2.65175	2.79969	2.95723	3.05246	3.11395	3.19928	3.27179	3.46377	3.53608	3.57018	3.63328	3.69395	3.75377	3.75377	3.75377	3.75377	3.75377	3.75377	3.75377	3.75377	3.75377	3.75377	3.75377	3.75377	3.75377	3.75377	3.75377	3.75377	3.75377	3.75377	3.75377
1054	-0.955983	0.966547	1.22422	1.55258	1.75242	1.98297	2.16656	2.29971	2.46401	2.60254	2.74853	2.87592	3.00944	3.12958	3.19673	3.27643	3.35423	3.44595	3.58327	3.69576	3.74726	3.79145	3.80357	3.81015	3.81015	3.81015	3.81015	3.81015	3.81015	3.81015	3.81015	3.81015	3.81015	3.81015	3.81015	3.81015	3.81015	3.81015	3.81015	3.81015	3.81015
1055	-1.05611	-0.455966	-0.0179984	0.320744	0.604556	0.869534	1.09402	1.28862	1.49228	1.65388	1.80194	1.98846	2.19529	2.34933	2.52443	2.69681	2.8732	3.02261	3.147	3.25808	3.39018	3.52696	3.65457	3.75941	3.83505	3.87126	3.99229	3.99229	3.99229	3.99229	3.99229	3.99229	3.99229	3.99229	3.99229	3.99229	3.99229	3.99229	3.99229	3.99229	3.99229
1056	-1.56432	-1.05108	0.112566	0.511448	0.727566	0.932038	1.05988	1.2078	1.32735	1.55899	1.67924	1.88177	2.03247	2.20182	2.3107	2.48137	2.62964	2.74526	2.96047	3.09436	3.22544	3.37692	3.45685	3.5645	3.61626	3.63464	3.64854	3.65232	3.75983	4.03214	4.08981	4.12128	4.19817	4.19817	4.19817	4.19817	4.19817	4.19817	4.19817	4.19817	4.19817
1057	-1.26001	-0.181833	0.561564	0.837192	1.08454	1.27519	1.40145	1.52502	1.6478	1.75483	1.91588	2.02128	2.11906	2.18504	2.30638	2.47096	2.61362	2.69022	2.89377	2.95993	3.02517	3.09194	3.15138	3.23565	3.34728	3.45666	3.70546	3.80499	3.80499	3.80499	3.80499	3.80499	3.80499	3.80499	3.80499	3.80499	3.80499	3.80499	3.80499	3.80499	3.80499
1058	0.232452	0.660943	0.965573	1.17165	1.36042	1.54381	1.71595	1.87109	2.02491	2.14845	2.2835	2.48323	2.6012	2.69097	2.78919	2.87919	2.98275	3.06425	3.13441	3.18139	3.22759	3.26141	3.30193	3.35271	3.36939	3.46373	3.47554	3.55265	3.71138	3.76496	3.8829	3.96579	3.97647	3.98411	3.98411	3.98411	3.98411	3.98411	3.98411	3.98411	3.98411
1059	-0.261534	0.456212	0.896665	1.19727	1.49397	1.6552	1.81788	2.05583	2.27732	2.43291	2.5523	2.78078	2.89007	2.97394	3.05712	3.16525	3.27472	3.38229	3.42214	3.50097	3.57349	3.65508	3.72298	3.74932	3.76099	3.7921	3.82507	3.84036	3.84036	3.84036	3.84036	3.84036	3.84036	3.84036	3.84036	3.84036	3.84036	3.84036	3.84036	3.84036	3.84036
1060	-1.16739	0.444687	0.715904	0.883314	1.04014	1.33058	1.47939	1.60459	1.75009	1.87627	2.02343	2.16642	2.3577	2.52054	2.66785	2.74552	2.93147	2.99715	3.16332	3.22385	3.29209	3.35001	3.40754	3.4845	3.60523	3.63883	3.65667	3.67869	3.67869	3.67869	3.67869	3.67869	3.67869	3.67869	3.67869	3.67869	3.67869	3.67869	3.67869	3.67869	3.67869
1061	-1.48903	-0.55525	0.0118214	0.481338	0.689588	0.897655	1.07377	1.26277	1.53618	1.72983	1.86938	2.05966	2.19108	2.30619	2.3876	2.46809	2.66045	2.74317	2.89786	3.01389	3.08315	3.29279	3.36034	3.43463	3.49852	3.56731	3.6368	3.68424	3.72667	3.78119	3.80058	3.8646	3.8646	3.8646	3.8646	3.8646	3.8646	3.8646	3.8646	3.8646	3.8646
1062	-0.293321	0.247016	0.64277	0.817654	0.962877	1.1515	1.33587	1.59959	1.72006	1.85701	1.98846	2.10685	2.18235	2.33755	2.4124	2.46131	2.51503	2.62031	2.71764	2.87068	2.95852	3.05491	3.14409	3.17715	3.23573	3.3617	3.39445	3.41227	3.4269	3.42816	3.46067	3.46586	3.52499	3.52499	3.52499	3.52499	3.52499	3.52499	3.52499	3.52499	3.52499
1063	0.233699	0.49458	0.743647	0.960336	1.15279	1.33665	1.52179	1.66036	1.99189	2.20917	2.34113	2.4791	2.67703	2.8866	3.02642	3.19996	3.29417	3.39751	3.49602	3.58771	3.70863	3.7716	3.87329	3.94624	4.01148	4.0394	4.20456	4.37162	4.3962	4.3962	4.3962	4.3962	4.3962	4.3962	4.3962	4.3962	4.3962	4.3962	4.3962	4.3962	4.3962
1064	-1.18921	0.256166	0.604155	0.840934	1.05542	1.23682	1.41924	1.64915	1.82462	2.01429	2.2392	2.40904	2.56369	2.69665	2.8147	2.91506	2.98001	3.09764	3.16932	3.27638	3.37786	3.43032	3.47664	3.52441	3.60665	3.66366	3.70785	3.74615	3.77124	3.79701	3.8014	3.8014	3.8014	3.8014	3.8014	3.8014	3.8014	3.8014	3.8014	3.8014	3.8014
1065	0.113732	0.759058	1.08611	1.33981	1.58795	1.77937	1.95622	2.1116	2.24534	2.35789	2.44964	2.62864	2.69908	2.81614	2.94098	3.02843	3.10551	3.20075	3.26912	3.34556	3.46033	3.4785	3.66439	3.66439	3.66439	3.66439	3.66439	3.66439	3.66439	3.66439	3.66439	3.66439	3.66439	3.66439	3.66439	3.66439	3.66439	3.66439	3.66439	3.66439	3.66439
1066	0.218158	0.471635	0.701171	0.906362	1.08298	1.21106	1.37739	1.53127	1.68291	1.82501	1.93563	2.03763	2.14056	2.26959	2.38259	2.49963	2.699	2.85445	2.98959	3.15088	3.24208	3.2984	3.37732	3.45021	3.49831	3.53909	3.60902	3.69813	3.71618	3.90062	3.9326	4.05717	4.07373	4.27699	4.27699	4.27699	4.27699	4.27699	4.27699	4.27699	4.27699
1067	-0.0209216	0.311382	0.538801	0.795849	1.17281	1.42573	1.60384	1.75418	1.87448	1.99477	2.08782	2.2121	2.36453	2.44574	2.52545	2.65021	2.73315	2.82132	2.90051	3.0119	3.12485	3.2398	3.30881	3.35891	3.49527	3.54262	3.65315	3.74038	3.81112	3.84922	3.93455	3.93455	3.93455	3.93455	3.93455	3.93455	3.93455	3.93455	3.93455	3.93455	3.93455
1068	-0.00695437	0.339168	0.623429	0.840649	1.05247	1.28618	1.51661	1.73751	1.95589	2.14284	2.31413	2.50648	2.65831	2.90155	3.14551	3.31131	3.43928	3.58287	3.71982	3.80872	3.89307	3.99085	4.06446	4.16364	4.184	4.34643	4.42528	4.42528	4.42528	4.42528	4.42528	4.42528	4.42528	4.42528	4.42528	4.42528	4.42528	4.42528	4.42528	4.42528	4.42528
1069	-1.52003	0.332051	0.586042	0.850932	1.08618	1.3485	1.51705	1.64513	1.80826	1.91717	2.02494	2.15768	2.28217	2.41234	2.54928	2.65373	2.77011	2.82652	2.90327	2.96191	3.00584	3.07206	3.16537	3.20332	3.34525	3.39021	3.41057	3.42269	3.50138	3.64707	3.66743	3.71063	3.71063	3.71063	3.71063	3.71063	3.71063	3.71063	3.71063	3.71063	3.71063
1070	0.313725	0.597634	0.975569	1.16447	1.36349	1.57328	1.7632	1.91421	2.08515	2.20503	2.32089	2.43436	2.57383	2.66846	2.77488	2.86711	2.95063	3.03548	3.1209	3.21659	3.27981	3.31518	3.38226	3.41668	3.50076	3.58107	3.60722	3.64342	3.65246	3.73224	3.75952	3.83658	3.83658	3.83658	3.83658	3.83658	3.83658	3.83658	3.83658	3.83658	3.83658
1071	0.115109	0.454056	0.740142	1.02466	1.2743	1.50206	1.6274	1.80045	1.93688	2.04977	2.19282	2.29753	2.52059	2.6586	2.76311	2.87343	2.91625	3.1131	3.15514	3.19784	3.23144	3.30004	3.36075	3.3809	3.45322	3.52877	3.6369	3.65241	3.65241	3.65241	3.65241	3.65241	3.65241	3.65241	3.65241	3.65241	3.65241	3.65241	3.65241	3.65241	3.65241
1072	-1.41906	-0.233281	0.0577088	0.497092	1.06106	1.342	1.5593	1.71931	1.83086	1.9415	2.02892	2.13743	2.23851	2.36243	2.47208	2.54095	2.61345	2.68513	2.72185	2.7807	2.83944	2.92204	2.97052	3.00883	3.03477	3.13607	3.23882	3.29205	3.29205	3.29205	3.29205	3.29205	3.29205	3.29205	3.29205	3.29205	3.29205	3.29205	3.29205	3.29205	3.29205
1073	-0.135676	0.300313	0.536961	0.757598	0.980845	1.18514	1.45984	1.62132	1.76485	1.88927	2.01278	2.14556	2.23595	2.33017	2.43025	2.57566	2.70992	2.79499	2.87127	3.07498	3.1958	3.24184	3.43618	3.48551	3.49805	3.51277	3.56724	3.59057	3.60769	3.67427	3.74731	3.89327	3.90064	3.90064	3.90064	3.90064	3.90064	3.90064	3.90064	3.90064	3.90064
1074	0.755284	0.974815	1.16706	1.35069	1.5295	1.78488	1.95326	2.1076	2.35162	2.48562	2.61857	2.74718	2.88928	3.0193	3.12103	3.27455	3.33684	3.41652	3.53745	3.61676	3.67391	3.71228	3.92832	3.94933	4.018	4.04002	4.04002	4.04002	4.04002	4.04002	4.04002	4.04002	4.04002	4.04002	4.04002	4.04002	4.04002	4.04002	4.04002	4.04002	4.04002
1075	-1.43008	-1.09666	0.293018	0.616635	0.861968	1.11333	1.34174	1.51988	1.69103	1.84124	1.98787	2.17503	2.32888	2.44499	2.55234	2.63435	2.78274	2.92871	3.14653	3.35348	3.48091	3.57949	3.76823	3.85077	3.90977	3.90977	3.90977	3.90977	3.90977	3.90977	3.90977	3.90977	3.90977	3.90977	3.90977	3.90977	3.90977	3.90977	3.90977	3.90977	3.90977
1076	-1.4406	-0.831384	-0.0227718	0.453457	0.797455	1.01834	1.19543	1.43428	1.63463	1.75268	2.04173	2.21395	2.31778	2.40984	2.54371	2.668	2.94972	3.0582	3.1653	3.24111	3.37902	3.45304	3.48829	3.52966	3.56762	3.60169	3.68605	3.68605	3.68605	3.68605	3.68605	3.68605	3.68605	3.68605	3.68605	3.68605	3.68605	3.68605	3.68605	3.68605	3.68605
1077	-0.890577	-0.155765	0.241655	0.547916	0.731577	1.0368	1.28706	1.48557	1.67816	1.7892	1.91118	2.11758	2.2901	2.44662	2.57549	2.67475	2.83927	2.96964	3.10409	3.20107	3.25631	3.31444	3.34322	3.3638	3.4367	3.51977	3.54698	3.62817	3.68124	3.69112	3.69112	3.69112	3.69112	3.69112	3.69112	3.69112	3.69112	3.69112	3.69112	3.69112	3.69112
1078	-1.42966	-0.815288	0.236605	0.597356	0.945595	1.21251	1.4584	1.66185	1.83518	2.00697	2.18783	2.45625	2.66768	2.81308	2.96527	3.10461	3.27316	3.35804	3.43131	3.50433	3.62017	3.6627	3.77339	3.80153	3.8259	3.8259	3.8259	3.8259	3.8259	3.8259	3.8259	3.8259	3.8259	3.8259	3.8259	3.8259	3.8259	3.8259	3.8259	3.8259	3.8259
1079	-1.51644	-0.956087	-0.0880108	0.495763	0.790591	1.04984	1.2786	1.48502	1.68478	1.84681	1.99637	2.14312	2.25817	2.37601	2.51183	2.62466	2.75044	2.94899	3.05374	3.16903	3.27214	3.39572	3.51605	3.69467	3.78931	3.87049	3.9659	4.05331	4.14887	4.16207	4.25656	4.31507	4.31507	4.31507	4.31507	4.31507	4.31507	4.31507	4.31507	4.31507	4.31507
1080	-1.51988	-0.18409	0.158654	0.446445	0.64563	0.810651	0.949382	1.08353	1.19836	1.32938	1.50041	1.5907	1.66989	1.72567	1.81524	1.97212	2.14548	2.29241	2.39654	2.44327	2.45804	2.53207	2.69908	2.72308	2.72638	2.73789	2.82954	2.95913	2.96995	3.0567	3.11709	3.18689	3.2608	3.29105	3.37562	3.45568	3.57382	3.58776	3.6323	3.66926	3.66926
1081	0.333508	0.591038	0.937026	1.17627	1.54858	1.77262	2.07468	2.3058	2.46917	2.58197	2.72793	2.82376	2.93607	3.02588	3.09357	3.21626	3.40201	3.50192	3.61611	3.6944	3.84291	3.93473	3.93473	3.93473	3.93473	3.93473	3.93473	3.93473	3.93473	3.93473	3.93473	3.93473	3.93473	3.93473	3.93473	3.93473	3.93473	3.93473	3.93473	3.93473	3.93473
1082	-1.59472	0.0186563	0.570792	0.789302	0.991333	1.1611	1.30976	1.47908	1.63336	1.78442	1.96196	2.18049	2.48645	2.60001	2.74021	2.89699	3.00394	3.25609	3.40744	3.53583	3.68184	3.8166	3.91742	3.96279	3.97396	4.0516	4.11992	4.20847	4.20847	4.20847	4.20847	4.20847	4.20847	4.20847	4.20847	4.20847	4.20847	4.20847	4.20847	4.20847	4.20847
1083	-1.35434	-0.258452	0.547409	0.934478	1.22187	1.46982	1.67832	1.86939	2.09515	2.35616	2.49539	2.69258	2.79516	3.00706	3.10168	3.19149	3.29554	3.44799	3.51605	3.57725	3.65204	3.70019	3.7346	3.7346	3.7346	3.7346	3.7346	3.7346	3.7346	3.7346	3.7346	3.7346	3.7346	3.7346	3.7346	3.7346	3.7346	3.7346	3.7346	3.7346	3.7346
1084	-1.76245	-1.0676	-0.176152	0.22565	0.590876	0.837494	1.10329	1.33493	1.50704	1.66971	1.82216	1.95265	2.03219	2.10906	2.27943	2.38016	2.48785	2.58656	2.65898	2.72674	2.78773	2.91519	2.99394	3.09009	3.13901	3.17807	3.24886	3.32508	3.33838	3.38461	3.38687	3.44386	3.57593	3.77984	3.79808	3.83226	3.89175	4.03829	4.03829	4.03829	4.03829
1085	-0.937545	-0.17057	0.224253	0.59653	0.858116	1.18898	1.31634	1.42368	1.53231	1.61242	1.72643	1.81497	1.87809	1.90087	1.98596	2.20067	2.46863	2.72286	2.89339	2.99934	3.05905	3.24959	3.32566	3.40962	3.5993	3.75676	3.87346	3.91841	4.01321	4.07588	4.14747	4.19477	4.21352	4.22341	4.22973	4.22973	4.22973	4.22973	4.22973	4.22973	4.22973
1086	0.653327	0.953731	1.2899	1.57632	1.77379	1.93936	2.13529	2.2726	2.38885	2.53007	2.77375	2.98088	3.07054	3.12643	3.13921	3.23123	3.23294	3.26987	3.30307	3.35009	3.38989	3.51821	3.6018	3.66935	3.66935	3.66935	3.66935	3.66935	3.66935	3.66935	3.66935	3.66935	3.66935	3.66935	3.66935	3.66935	3.66935	3.66935	3.66935	3.66935	3.66935
1087	-1.15029	0.722146	1.16691	1.42344	1.60156	1.8074	2.00475	2.1614	2.3915	2.53223	2.76019	2.88774	2.98265	3.0734	3.19455	3.26917	3.42176	3.50592	3.54799	3.61661	3.7374	3.7374	3.7374	3.7374	3.7374	3.7374	3.7374	3.7374	3.7374	3.7374	3.7374	3.7374	3.7374	3.7374	3.7374	3.7374	3.7374	3.7374	3.7374	3.7374	3.7374
1088	0.330439	0.629426	0.835939	1.01406	1.20126	1.39796	1.5578	1.68501	1.82711	1.96378	2.07303	2.20227	2.33908	2.50279	2.63086	2.73129	2.80219	2.84169	2.91404	2.995	3.10017	3.24695	3.34118	3.4839	3.60017	3.68658	3.77248	3.84392	3.92393	4.01863	4.16655	4.30459	4.35311	4.40159	4.43465	4.46879	4.48774	4.50525	4.53573	4.53573	4.53573
1089	0.565561	0.925962	1.13481	1.34076	1.51993	1.61947	1.75186	1.93137	2.02319	2.12896	2.27514	2.5484	2.7608	2.87277	3.00747	3.12859	3.26409	3.35741	3.44759	3.51747	3.62883	3.69512	3.90814	3.91311	3.98836	4.02438	4.02438	4.02438	4.02438	4.02438	4.02438	4.02438	4.02438	4.02438	4.02438	4.02438	4.02438	4.02438	4.02438	4.02438	4.02438
1090	-1.42624	-1.03242	-0.363393	0.338179	0.745519	0.920597	1.06077	1.19996	1.33407	1.4604	1.61967	1.81765	1.98783	2.13592	2.26714	2.45021	2.61923	2.71863	2.83782	2.93669	3.01552	3.13597	3.23607	3.31813	3.42791	3.45886	3.48646	3.55761	3.56421	3.56421	3.56421	3.56421	3.56421	3.56421	3.56421	3.56421	3.56421	3.56421	3.56421	3.56421	3.56421
1091	-1.37877	0.127425	0.663736	0.874393	1.20158	1.46312	1.71638	1.9416	2.1037	2.22778	2.37369	2.48353	2.60065	2.72539	2.79697	2.87968	2.94572	3.0095	3.05958	3.12765	3.18921	3.25782	3.33646	3.34717	3.37239	3.38083	3.38614	3.45505	3.57349	3.62451	3.73376	3.77772	3.84096	3.84096	3.84096	3.84096	3.84096	3.84096	3.84096	3.84096	3.84096
1092	-1.38733	-0.952899	0.174936	0.507637	0.694802	0.946445	1.12698	1.36267	1.58225	1.76451	1.99209	2.176	2.3468	2.45515	2.57276	2.70621	2.89667	3.10846	3.27725	3.42045	3.51062	3.8245	3.8709	3.89468	3.95231	4.01372	4.02291	4.05844	4.05844	4.05844	4.05844	4.05844	4.05844	4.05844	4.05844	4.05844	4.05844	4.05844	4.05844	4.05844	4.05844
1093	0.10855	0.357586	0.587355	0.813172	1.0105	1.23941	1.42531	1.56984	1.70415	1.92812	2.07802	2.19209	2.35742	2.50759	2.73844	2.89993	3.0569	3.19014	3.30041	3.45926	3.57991	3.71884	3.83048	3.8823	4.00564	4.25114	4.26424	4.34055	4.36164	4.36164	4.36164	4.36164	4.36164	4.36164	4.36164	4.36164	4.36164	4.36164	4.36164	4.36164	4.36164
1094	-1.36609	-1.09261	0.191901	0.518706	0.760595	0.986941	1.17132	1.33176	1.47167	1.62475	1.79726	2.06534	2.27163	2.41255	2.55298	2.68087	2.80436	2.90433	3.0303	3.1075	3.23057	3.32288	3.39311	3.45905	3.48174	3.52451	3.5883	3.59454	3.60088	3.60088	3.60088	3.60088	3.60088	3.60088	3.60088	3.60088	3.60088	3.60088	3.60088	3.60088	3.60088
1095	-1.25689	-0.155652	0.689072	1.11168	1.36075	1.56798	1.69937	1.83074	1.92557	2.04072	2.23565	2.33308	2.46872	2.77272	2.95747	3.09055	3.18036	3.25593	3.35076	3.47395	3.48518	3.53464	3.60141	3.63648	3.66536	3.66536	3.66536	3.66536	3.66536	3.66536	3.66536	3.66536	3.66536	3.66536	3.66536	3.66536	3.66536	3.66536	3.66536	3.66536	3.66536
1096	-1.30272	0.670576	0.985052	1.25528	1.50474	1.71566	1.87883	2.05012	2.19491	2.34592	2.47151	2.59649	2.71091	2.79016	2.9347	3.05667	3.17064	3.21915	3.2677	3.31489	3.40731	3.58722	3.61445	3.81058	3.89812	3.90148	3.90148	3.90148	3.90148	3.90148	3.90148	3.90148	3.90148	3.90148	3.90148	3.90148	3.90148	3.90148	3.90148	3.90148	3.90148
1097	1.12998	1.50154	1.78972	2.0226	2.23185	2.45836	2.70586	2.9365	3.146	3.28825	3.40436	3.51504	3.60865	3.67709	3.72831	3.94809	3.973	3.99706	4.02926	4.08971	4.09972	4.12618	4.18533	4.18533	4.18533	4.18533	4.18533	4.18533	4.18533	4.18533	4.18533	4.18533	4.18533	4.18533	4.18533	4.18533	4.18533	4.18533	4.18533	4.18533	4.18533
1098	0.194477	0.731104	1.08821	1.35555	1.56427	1.76362	1.94806	2.20748	2.44663	2.69031	2.82354	3.01368	3.06188	3.10659	3.16094	3.21802	3.22917	3.28044	3.28837	3.30068	3.30433	3.36863	3.36863	3.36863	3.36863	3.36863	3.36863	3.36863	3.36863	3.36863	3.36863	3.36863	3.36863	3.36863	3.36863	3.36863	3.36863	3.36863	3.36863	3.36863	3.36863
1099	-0.559892	0.566338	0.94036	1.17559	1.39162	1.71936	1.97623	2.1392	2.2947	2.50211	2.60673	2.71438	2.81256	2.9427	3.05163	3.11036	3.17904	3.22863	3.25902	3.27976	3.38437	3.53424	3.55702	3.59717	3.6149	3.61749	3.61749	3.61749	3.61749	3.61749	3.61749	3.61749	3.61749	3.61749	3.61749	3.61749	3.61749	3.61749	3.61749	3.61749	3.61749
1100	-1.26641	-0.159122	0.336297	0.591742	0.805972	1.10438	1.30473	1.44989	1.54451	1.68191	1.77676	1.89691	1.98729	2.07007	2.16578	2.3696	2.52045	2.61094	2.69237	2.86905	2.94715	3.02076	3.07283	3.11775	3.17766	3.31563	3.39512	3.4467	3.48813	3.50346	3.51439	3.52768	3.56139	3.64021	3.66208	3.66208	3.66208	3.66208	3.66208	3.66208	3.66208
1101	-0.38412	0.360975	1.08279	1.40965	1.62598	1.82429	2.00977	2.14733	2.28013	2.4017	2.49688	2.55435	2.62407	2.70594	2.84082	2.98593	3.11136	3.22684	3.25631	3.31328	3.42435	3.45803	3.64175	3.71315	3.798	3.85692	4.02354	4.07141	4.07141	4.07141	4.07141	4.07141	4.07141	4.07141	4.07141	4.07141	4.07141	4.07141	4.07141	4.07141	4.07141
1102	0.551262	0.752566	1.02223	1.19998	1.35954	1.51519	1.67988	1.86853	2.06298	2.27288	2.44843	2.59096	2.7239	2.85251	2.92918	2.99621	3.06396	3.17366	3.23364	3.28387	3.33488	3.43845	3.64396	3.70892	3.75144	3.81816	3.84295	3.9343	3.95351	3.96729	4.048	4.07258	4.0808	4.10267	4.10267	4.10267	4.10267	4.10267	4.10267	4.10267	4.10267
1103	-1.29089	-0.269732	-0.00909686	0.27087	0.478546	0.6692	0.76186	1.00233	1.21051	1.39326	1.5621	1.64677	1.77464	1.93684	2.06528	2.18193	2.31459	2.37327	2.53219	2.70083	2.81357	2.86091	3.04151	3.11261	3.16808	3.27651	3.32083	3.3657	3.3657	3.3657	3.3657	3.3657	3.3657	3.3657	3.3657	3.3657	3.3657	3.3657	3.3657	3.3657	3.3657
1104	-1.49245	-1.36556	-1.27178	-1.23463	-1.19773	-1.16832	-1.14841	-1.12031	-1.10031	-1.08002	-1.07069	-1.04898	-1.04898	-1.04898	-1.04898	-1.04898	-1.04898	-1.04898	-1.04898	-1.04898	-1.04898	-1.04898	-1.04898	-1.04898	-1.04898	-1.04898	-1.04898	-1.04898	-1.04898	-1.04898	-1.04898	-1.04898	-1.04898	-1.04898	-1.04898	-1.04898	-1.04898	-1.04898	-1.04898	-1.04898	-1.04898
1105	-1.16341	-0.358732	0.813044	1.1235	1.35636	1.60095	1.84365	2.04907	2.24181	2.43464	2.59617	2.68972	2.77197	2.85869	2.97062	3.05436	3.1069	3.21306	3.31816	3.61197	3.62914	3.6415	3.6415	3.6415	3.6415	3.6415	3.6415	3.6415	3.6415	3.6415	3.6415	3.6415	3.6415	3.6415	3.6415	3.6415	3.6415	3.6415	3.6415	3.6415	3.6415
1106	-0.379627	0.234869	0.574261	0.845435	1.07966	1.2905	1.56657	1.82678	1.99977	2.1716	2.33621	2.4937	2.68183	2.84951	2.98342	3.10043	3.2102	3.38701	3.5045	3.71577	3.8097	3.88622	3.94894	4.01764	4.06377	4.06801	4.08068	4.08068	4.08068	4.08068	4.08068	4.08068	4.08068	4.08068	4.08068	4.08068	4.08068	4.08068	4.08068	4.08068	4.08068
1107	-1.37677	-0.496935	0.970346	1.35711	1.5095	1.88308	2.03739	2.18983	2.35361	2.56254	2.71034	2.83603	3.03615	3.16652	3.27965	3.46603	3.57461	3.6625	3.73703	3.79157	3.8421	3.90122	3.93279	3.98831	4.0198	4.04197	4.04197	4.04197	4.04197	4.04197	4.04197	4.04197	4.04197	4.04197	4.04197	4.04197	4.04197	4.04197	4.04197	4.04197	4.04197
1108	-1.57588	0.415774	0.754338	0.963991	1.16616	1.40393	1.52254	1.64613	1.93497	2.0442	2.14391	2.2974	2.4367	2.55349	2.66529	2.78113	2.86366	2.94463	3.06128	3.16327	3.24805	3.31506	3.3501	3.44912	3.51647	3.51647	3.51647	3.51647	3.51647	3.51647	3.51647	3.51647	3.51647	3.51647	3.51647	3.51647	3.51647	3.51647	3.51647	3.51647	3.51647
1109	-0.930105	-0.182218	0.335701	0.729152	0.964029	1.18464	1.38216	1.55264	1.71689	1.8017	2.0652	2.30995	2.56461	2.64926	2.76388	2.85396	2.88805	2.9594	3.03791	3.07336	3.08631	3.10329	3.26701	3.30633	3.3449	3.40181	3.5368	3.58511	3.67378	3.73189	3.73189	3.73189	3.73189	3.73189	3.73189	3.73189	3.73189	3.73189	3.73189	3.73189	3.73189
1110	-0.0109873	0.166592	0.334756	0.527812	0.768014	1.00078	1.28082	1.41453	1.54232	1.84358	1.95959	2.08753	2.20791	2.27712	2.35609	2.54585	2.85577	2.92388	3.01783	3.1227	3.18323	3.23552	3.28316	3.31334	3.38151	3.44001	3.5215	3.54086	3.60998	3.63635	3.74688	3.76787	3.77758	3.78656	3.78656	3.78656	3.78656	3.78656	3.78656	3.78656	3.78656
1111	0.211556	0.461487	0.668988	0.889902	1.11307	1.29828	1.47884	1.64763	1.81862	1.95296	2.08655	2.21471	2.35814	2.50609	2.68435	2.85985	3.08736	3.19856	3.26601	3.39329	3.47509	3.56488	3.62536	3.69653	3.71079	3.73743	3.73743	3.73743	3.73743	3.73743	3.73743	3.73743	3.73743	3.73743	3.73743	3.73743	3.73743	3.73743	3.73743	3.73743	3.73743
1112	0.587311	0.946639	1.22011	1.46117	1.66265	1.86169	2.07049	2.27785	2.4394	2.5429	2.68591	2.83031	2.97407	3.07903	3.13766	3.1991	3.23238	3.27234	3.29468	3.31445	3.334	3.4198	3.50348	3.6181	3.64144	3.73677	3.74652	3.75531	3.77775	3.81671	3.89708	3.95402	4.01715	4.07885	4.07885	4.07885	4.07885	4.07885	4.07885	4.07885	4.07885
1113	-0.331655	0.330291	0.696192	1.00091	1.26076	1.50317	1.68604	1.83276	1.97877	2.19729	2.33937	2.5536	2.75742	2.87171	2.98018	3.04328	3.14674	3.24461	3.30516	3.39587	3.44778	3.52528	3.52528	3.52528	3.52528	3.52528	3.52528	3.52528	3.52528	3.52528	3.52528	3.52528	3.52528	3.52528	3.52528	3.52528	3.52528	3.52528	3.52528	3.52528	3.52528
1114	-1.01697	-0.390424	0.172963	0.362674	0.617023	0.960932	1.14338	1.28147	1.38494	1.65499	1.86694	2.02055	2.15021	2.30901	2.38988	2.49927	2.59235	2.69677	2.81671	2.87533	3.03814	3.12017	3.19746	3.25528	3.32689	3.35238	3.46517	3.70334	3.74041	3.74041	3.74041	3.74041	3.74041	3.74041	3.74041	3.74041	3.74041	3.74041	3.74041	3.74041	3.74041
1115	-0.0567495	0.352956	0.568653	0.773372	0.965911	1.24083	1.42674	1.61747	1.76817	1.90882	2.0583	2.38435	2.55173	2.64296	2.772	2.90178	3.10665	3.19526	3.25726	3.3601	3.40069	3.42983	3.44248	3.50226	3.51856	3.55736	3.63618	3.65469	3.67698	3.71785	3.76077	3.80241	3.94523	4.03371	4.08121	4.11778	4.13154	4.19564	4.30124	4.31829	4.31829
1116	-0.874555	0.636439	0.874993	1.09114	1.34681	1.71348	1.87235	2.00871	2.14739	2.27634	2.4444	2.69915	2.83098	2.99509	3.10758	3.19742	3.34441	3.38635	3.48526	3.60207	3.70015	3.71781	3.74492	3.77354	3.80599	3.81838	3.87221	3.88339	3.88339	3.88339	3.88339	3.88339	3.88339	3.88339	3.88339	3.88339	3.88339	3.88339	3.88339	3.88339	3.88339
1117	-0.964789	-0.196477	0.0834882	0.303574	0.480888	0.605379	0.701974	0.850132	1.17226	1.37835	1.52149	1.68631	1.81224	1.95639	2.05822	2.22004	2.33698	2.42397	2.50906	2.56817	2.65343	2.67895	2.733	2.77916	2.9377	3.03568	3.14798	3.2492	3.39391	3.46519	3.46519	3.46519	3.46519	3.46519	3.46519	3.46519	3.46519	3.46519	3.46519	3.46519	3.46519
1118	0.00374591	0.300242	0.564573	0.788369	1.0566	1.23538	1.42657	1.58224	1.79725	1.9821	2.15468	2.3067	2.45275	2.59684	2.714	2.83508	2.90865	2.97096	3.10791	3.19247	3.28041	3.35314	3.41058	3.44405	3.51704	3.53118	3.58264	3.71595	3.74491	3.78324	3.78324	3.78324	3.78324	3.78324	3.78324	3.78324	3.78324	3.78324	3.78324	3.78324	3.78324
1119	-1.39646	0.482403	0.958885	1.22064	1.39742	1.63103	1.93631	2.0986	2.22942	2.3607	2.54246	2.65175	2.77773	3.01418	3.11218	3.27893	3.4445	3.55063	3.67943	3.77446	3.86565	3.95863	4.11777	4.15515	4.2049	4.2049	4.2049	4.2049	4.2049	4.2049	4.2049	4.2049	4.2049	4.2049	4.2049	4.2049	4.2049	4.2049	4.2049	4.2049	4.2049
1120	0.793367	1.10634	1.41618	1.77967	2.1258	2.276	2.41737	2.58751	2.68754	2.79746	2.9086	2.98912	3.11903	3.21491	3.40095	3.53006	3.5927	3.67867	3.71545	3.74622	3.80252	3.89667	4.00742	4.06921	4.13783	4.14279	4.14279	4.14279	4.14279	4.14279	4.14279	4.14279	4.14279	4.14279	4.14279	4.14279	4.14279	4.14279	4.14279	4.14279	4.14279
1121	1.18007	1.49006	1.8201	2.02036	2.38999	2.56313	2.7058	2.85432	3.07518	3.18325	3.23957	3.36818	3.43875	3.50614	3.53092	3.56934	3.59869	3.68263	3.75849	3.80016	3.89328	3.94333	3.99477	4.04859	4.12222	4.18041	4.18041	4.18041	4.18041	4.18041	4.18041	4.18041	4.18041	4.18041	4.18041	4.18041	4.18041	4.18041	4.18041	4.18041	4.18041
1122	-1.4013	0.130795	0.508345	0.778882	0.960399	1.10408	1.29277	1.45771	1.59062	1.70768	1.83624	1.9307	2.01928	2.17718	2.28137	2.35477	2.47134	2.55021	2.59701	2.66255	2.78296	2.89543	3.0219	3.11823	3.1687	3.26129	3.39528	3.44297	3.46458	3.71841	3.76821	3.8872	3.98652	4.02377	4.0281	4.06094	4.08213	4.09213	4.12144	4.12144	4.12144
1123	-1.20456	0.187816	0.713271	1.03359	1.30944	1.6207	1.8327	1.99638	2.1331	2.25635	2.41944	2.55279	2.7098	2.9332	3.11089	3.2202	3.33883	3.40441	3.44189	3.49495	3.54446	3.58718	3.61999	3.66663	3.7545	3.80829	3.80953	3.86186	3.86186	3.86186	3.86186	3.86186	3.86186	3.86186	3.86186	3.86186	3.86186	3.86186	3.86186	3.86186	3.86186
1124	-0.0110958	0.434924	0.620804	0.818295	1.00552	1.20775	1.44302	1.64526	1.83901	2.02456	2.18128	2.36396	2.50643	2.74847	2.88617	3.00699	3.09652	3.17196	3.24371	3.41545	3.53015	3.65309	3.71065	3.79271	3.87522	3.91971	3.99385	4.10512	4.14152	4.19194	4.19194	4.19194	4.19194	4.19194	4.19194	4.19194	4.19194	4.19194	4.19194	4.19194	4.19194
1125	0.418594	0.728823	0.985259	1.19532	1.40829	1.56809	1.71074	1.90318	2.09497	2.25417	2.39883	2.52645	2.59902	2.70232	2.91298	3.01796	3.11586	3.20677	3.30041	3.34065	3.4722	3.56745	3.61192	3.63417	3.70214	3.75757	3.82281	3.88939	3.95363	3.9578	3.9578	3.9578	3.9578	3.9578	3.9578	3.9578	3.9578	3.9578	3.9578	3.9578	3.9578
1126	-1.09306	-0.114159	0.205904	0.463121	0.70752	0.883001	1.0297	1.17183	1.28979	1.47511	1.64979	1.75669	1.8658	1.9662	2.03485	2.18807	2.32262	2.47683	2.58506	2.66509	2.73982	2.78314	3.03931	3.19705	3.431	3.62498	3.75376	3.8702	3.97489	3.98334	3.98939	4.00734	4.00734	4.00734	4.00734	4.00734	4.00734	4.00734	4.00734	4.00734	4.00734
1127	-1.22814	-0.125152	0.889209	1.12219	1.31818	1.4491	1.59373	1.76074	1.86081	2.02345	2.10982	2.31389	2.48298	2.61859	2.69835	2.73668	2.75969	2.81532	2.8771	2.93588	2.941	2.941	2.941	2.941	2.941	2.941	2.941	2.941	2.941	2.941	2.941	2.941	2.941	2.941	2.941	2.941	2.941	2.941	2.941	2.941	2.941
1128	0.136255	0.384001	0.619524	0.82199	1.08921	1.28249	1.50722	1.69269	1.87298	2.03685	2.24813	2.40462	2.55056	2.67234	2.80347	2.92039	3.01441	3.09577	3.19447	3.27092	3.34059	3.41144	3.48787	3.51214	3.51327	3.58207	3.66495	3.70527	3.70527	3.70527	3.70527	3.70527	3.70527	3.70527	3.70527	3.70527	3.70527	3.70527	3.70527	3.70527	3.70527
1129	-1.55302	-0.00463849	0.726104	1.00292	1.23226	1.39903	1.55765	1.75308	1.99567	2.25671	2.39786	2.53736	2.68092	2.7835	2.89058	3.00897	3.10899	3.23092	3.29808	3.49885	3.52878	3.56486	3.62926	3.66547	3.71914	3.78656	3.8612	3.88883	3.91717	3.9491	3.96447	4.03748	4.04609	4.04609	4.04609	4.04609	4.04609	4.04609	4.04609	4.04609	4.04609
1130	-0.34086	0.195393	0.769995	1.08655	1.38577	1.59756	1.80638	2.01658	2.1624	2.2872	2.44046	2.54106	2.63049	2.76687	2.87824	2.97652	3.06213	3.14685	3.23197	3.40083	3.46921	3.50183	3.53002	3.63558	3.72727	3.72727	3.72727	3.72727	3.72727	3.72727	3.72727	3.72727	3.72727	3.72727	3.72727	3.72727	3.72727	3.72727	3.72727	3.72727	3.72727
1131	-1.59342	-1.19308	-0.0650007	0.455728	0.766029	1.04971	1.28953	1.52498	1.75165	1.96124	2.14455	2.32112	2.46361	2.55159	2.73248	2.92057	3.00264	3.0818	3.23628	3.30388	3.35142	3.44372	3.5074	3.52656	3.57261	3.5957	3.6121	3.65706	3.68522	3.70509	3.7509	3.76648	3.76648	3.76648	3.76648	3.76648	3.76648	3.76648	3.76648	3.76648	3.76648
1132	-0.0170886	0.383914	0.763001	1.06056	1.34347	1.56233	1.78909	2.02091	2.21372	2.48219	2.68922	2.90006	3.08517	3.22178	3.33392	3.49423	3.58862	3.64037	3.7144	3.8598	3.93336	3.93336	3.93336	3.93336	3.93336	3.93336	3.93336	3.93336	3.93336	3.93336	3.93336	3.93336	3.93336	3.93336	3.93336	3.93336	3.93336	3.93336	3.93336	3.93336	3.93336
1133	-1.4861	-0.311574	0.00213748	0.489793	0.775297	1.01813	1.19102	1.29656	1.41976	1.62595	1.75765	1.85252	1.92269	1.99733	2.0805	2.14101	2.17776	2.26753	2.34858	2.38319	2.38548	2.47219	2.56403	2.62451	2.71618	2.77288	2.82907	2.92117	2.95723	2.98698	3.03144	3.08787	3.17053	3.20708	3.27067	3.33368	3.33368	3.33368	3.33368	3.33368	3.33368
1134	-0.792558	0.164542	0.494587	0.887618	1.20845	1.45025	1.68661	1.87249	2.03319	2.1734	2.31966	2.45822	2.58119	2.78392	2.93078	3.05293	3.17651	3.28012	3.34825	3.46332	3.51816	3.64953	3.77573	3.83372	3.85497	3.86666	3.86666	3.86666	3.86666	3.86666	3.86666	3.86666	3.86666	3.86666	3.86666	3.86666	3.86666	3.86666	3.86666	3.86666	3.86666
1135	-1.06803	0.585281	0.876572	1.1519	1.37349	1.58225	1.73662	2.01501	2.15967	2.29882	2.39365	2.51233	2.67442	2.76876	2.81652	2.94278	3.04219	3.10392	3.34087	3.38331	3.46288	3.53197	3.60933	3.645	3.67363	3.74899	3.79827	3.81369	3.84658	3.88305	3.93398	3.93798	3.93798	3.93798	3.93798	3.93798	3.93798	3.93798	3.93798	3.93798	3.93798
1136	-0.189949	0.284339	0.604404	0.803462	1.01697	1.23855	1.42299	1.65452	1.8433	2.01244	2.26447	2.50876	2.64161	2.80827	2.9011	2.98324	3.05905	3.14385	3.20201	3.40638	3.52281	3.61883	3.80187	3.87996	3.95131	3.99603	4.11873	4.15618	4.17874	4.17874	4.17874	4.17874	4.17874	4.17874	4.17874	4.17874	4.17874	4.17874	4.17874	4.17874	4.17874
1137	-1.12014	0.180566	0.545262	0.852628	1.23479	1.53912	1.8124	2.06737	2.33586	2.57858	2.72179	2.92343	3.06156	3.21173	3.34594	3.48162	3.68611	3.76602	3.81993	4.01184	4.06965	4.15106	4.15106	4.15106	4.15106	4.15106	4.15106	4.15106	4.15106	4.15106	4.15106	4.15106	4.15106	4.15106	4.15106	4.15106	4.15106	4.15106	4.15106	4.15106	4.15106
1138	0.436203	0.666859	0.929607	1.13802	1.36093	1.57608	1.85935	2.1346	2.36812	2.77966	2.98522	3.18387	3.3491	3.56717	3.69676	3.83264	3.87009	3.90983	3.92323	3.98263	3.98263	3.98263	3.98263	3.98263	3.98263	3.98263	3.98263	3.98263	3.98263	3.98263	3.98263	3.98263	3.98263	3.98263	3.98263	3.98263	3.98263	3.98263	3.98263	3.98263	3.98263
1139	-0.348943	0.05683	0.327942	0.619535	0.803291	0.95633	1.10907	1.33551	1.47061	1.59082	1.75287	1.81973	1.90049	1.96021	2.02686	2.12773	2.23676	2.3149	2.51088	2.6162	2.68385	2.76415	2.96437	3.30518	3.41296	3.48897	3.5275	3.56568	3.60625	3.63059	3.70015	3.73548	3.77056	3.81653	3.82583	3.82583	3.82583	3.82583	3.82583	3.82583	3.82583
1140	-1.4892	-0.920789	-0.451288	0.343736	0.962537	1.28948	1.6061	1.86748	2.10385	2.2979	2.48812	2.62856	2.79653	2.93806	3.06903	3.22085	3.30285	3.35755	3.4891	3.54604	3.62494	3.68044	3.71514	3.7392	3.78943	3.79958	3.79958	3.79958	3.79958	3.79958	3.79958	3.79958	3.79958	3.79958	3.79958	3.79958	3.79958	3.79958	3.79958	3.79958	3.79958
1141	-1.16134	0.613782	0.868281	1.10356	1.28719	1.49162	1.68694	1.85088	2.01749	2.16677	2.31735	2.41871	2.52418	2.61122	2.66886	2.73352	2.82581	2.93372	2.97592	3.01302	3.0473	3.17002	3.19093	3.21161	3.26952	3.34491	3.36624	3.40456	3.41231	3.62797	3.6412	3.6412	3.6412	3.6412	3.6412	3.6412	3.6412	3.6412	3.6412	3.6412	3.6412
1142	-1.39031	-0.00450528	0.373199	0.551418	0.81934	1.0366	1.19961	1.33517	1.46999	1.6331	1.81421	1.99707	2.08684	2.22246	2.34407	2.51092	2.62618	2.70315	2.77183	2.83099	2.96309	3.10856	3.17342	3.20623	3.21068	3.25571	3.26383	3.26594	3.33466	3.40225	3.44651	3.46133	3.51996	3.56204	3.56204	3.56204	3.56204	3.56204	3.56204	3.56204	3.56204
1143	-0.874014	-0.0670959	0.340978	0.644401	0.940084	1.20357	1.49928	1.69248	1.85976	2.08354	2.30304	2.43839	2.56081	2.66807	2.81315	2.94558	2.98644	3.09063	3.12842	3.23321	3.42045	3.46321	3.51038	3.54829	3.58155	3.58155	3.58155	3.58155	3.58155	3.58155	3.58155	3.58155	3.58155	3.58155	3.58155	3.58155	3.58155	3.58155	3.58155	3.58155	3.58155
1144	-1.02339	-0.214546	0.264102	0.549506	0.805049	0.986202	1.15654	1.31811	1.47473	1.6355	1.79978	2.00274	2.11685	2.25617	2.33634	2.45611	2.61449	2.66451	2.7963	2.81393	2.84627	2.85907	2.89627	2.89627	2.89627	2.89627	2.89627	2.89627	2.89627	2.89627	2.89627	2.89627	2.89627	2.89627	2.89627	2.89627	2.89627	2.89627	2.89627	2.89627	2.89627
1145	1.00169	1.22974	1.49996	1.66381	1.84565	2.06643	2.20109	2.33212	2.4549	2.55219	2.67139	2.78621	2.921	3.00116	3.07278	3.13695	3.17413	3.20327	3.3807	3.39168	3.48717	3.48717	3.48717	3.48717	3.48717	3.48717	3.48717	3.48717	3.48717	3.48717	3.48717	3.48717	3.48717	3.48717	3.48717	3.48717	3.48717	3.48717	3.48717	3.48717	3.48717
1146	0.313418	0.59428	0.783749	0.945604	1.09681	1.22143	1.38068	1.62016	1.75442	1.92678	2.08006	2.2312	2.38601	2.56833	2.71743	2.81331	2.92281	3.03901	3.15579	3.31654	3.42278	3.49985	3.57811	3.68993	3.77021	3.88246	3.95336	3.95336	3.95336	3.95336	3.95336	3.95336	3.95336	3.95336	3.95336	3.95336	3.95336	3.95336	3.95336	3.95336	3.95336
1147	-1.26113	-0.554063	-0.159976	0.232808	0.481076	0.66172	0.819848	0.9531	1.09315	1.20465	1.32308	1.39318	1.47992	1.519	1.57825	1.62117	1.72939	1.88173	2.05408	2.22692	2.36132	2.43303	2.51028	2.60178	2.63833	2.74097	2.775	2.77774	2.83591	2.89057	2.9425	3.28553	3.47287	3.634	3.76487	3.78125	3.78125	3.78125	3.78125	3.78125	3.78125
1148	-1.62412	0.0315283	0.464642	0.780102	1.02016	1.20635	1.37533	1.56579	1.78999	2.01622	2.17949	2.37337	2.49475	2.64648	2.7373	2.84622	3.08103	3.17351	3.26542	3.3935	3.46478	3.5144	3.56684	3.57766	3.63828	3.64946	3.65858	3.77556	3.79596	3.84814	3.92309	4.00883	4.08703	4.08703	4.08703	4.08703	4.08703	4.08703	4.08703	4.08703	4.08703
1149	0.804708	1.2412	1.64097	1.83703	2.01905	2.18339	2.32036	2.47391	2.60097	2.72706	2.85177	2.96936	3.08791	3.20309	3.2606	3.29642	3.36885	3.40012	3.41261	3.48553	3.49242	3.5529	3.5529	3.5529	3.5529	3.5529	3.5529	3.5529	3.5529	3.5529	3.5529	3.5529	3.5529	3.5529	3.5529	3.5529	3.5529	3.5529	3.5529	3.5529	3.5529
1150	-0.849531	0.13242	0.364377	0.525627	0.767444	0.926176	1.04267	1.16384	1.27941	1.42343	1.74283	1.88176	1.98134	2.14328	2.26192	2.34761	2.47442	2.60291	2.71764	2.78268	2.79895	2.87679	2.97715	3.11117	3.2317	3.24699	3.24699	3.24699	3.24699	3.24699	3.24699	3.24699	3.24699	3.24699	3.24699	3.24699	3.24699	3.24699	3.24699	3.24699	3.24699
1151	-1.18556	0.679179	0.952817	1.06514	1.2183	1.3278	1.46398	1.53358	1.58765	1.65256	1.77511	1.91545	2.05285	2.12937	2.16996	2.19455	2.28159	2.32679	2.34822	2.37632	2.44607	2.53702	2.6322	2.83758	3.1268	3.21482	3.3088	3.40352	3.48619	3.527	3.6468	3.66251	3.66251	3.66251	3.66251	3.66251	3.66251	3.66251	3.66251	3.66251	3.66251
1152	0.140424	0.561444	0.897095	1.06659	1.38633	1.5199	1.66022	1.78934	1.8996	2.00926	2.1531	2.2501	2.44046	2.53061	2.60794	2.72063	2.79282	2.88798	2.97389	3.06566	3.21262	3.29612	3.33244	3.33776	3.35873	3.35873	3.35873	3.35873	3.35873	3.35873	3.35873	3.35873	3.35873	3.35873	3.35873	3.35873	3.35873	3.35873	3.35873	3.35873	3.35873
1153	-0.0870079	0.26197	0.593811	0.844518	1.03615	1.2199	1.35025	1.43517	1.53026	1.664	1.77385	1.90766	1.99618	2.06055	2.15665	2.47594	2.59118	2.73491	2.87577	3.02772	3.15851	3.28001	3.32942	3.39638	3.47201	3.54731	3.62419	3.67511	3.71958	3.78954	3.79944	3.85499	3.93068	4.06621	4.06621	4.06621	4.06621	4.06621	4.06621	4.06621	4.06621
1154	-1.61206	0.148261	1.24454	1.44313	1.59122	1.73735	1.82256	1.92053	2.06861	2.15026	2.23739	2.31491	2.4067	2.51421	2.62658	2.85058	3.00516	3.06852	3.15017	3.22122	3.29107	3.34268	3.41881	3.50294	3.53012	3.55692	3.56186	3.63633	3.63633	3.63633	3.63633	3.63633	3.63633	3.63633	3.63633	3.63633	3.63633	3.63633	3.63633	3.63633	3.63633
1155	0.027832	0.440424	0.772212	0.918702	1.13482	1.28682	1.44197	1.65983	1.78935	1.90481	2.02448	2.14833	2.34726	2.45896	2.60861	2.72769	2.85091	3.09118	3.24994	3.3394	3.4337	3.48386	3.51683	3.55201	3.58406	3.62406	3.66827	3.69189	3.71511	3.85991	3.88669	3.88669	3.88669	3.88669	3.88669	3.88669	3.88669	3.88669	3.88669	3.88669	3.88669
1156	-1.41918	-1.02764	-0.160037	0.287879	0.760504	1.10211	1.42365	1.6938	1.93995	2.17629	2.39478	2.59103	2.70617	2.84523	3.0467	3.18296	3.27664	3.45235	3.45235	3.45235	3.45235	3.45235	3.45235	3.45235	3.45235	3.45235	3.45235	3.45235	3.45235	3.45235	3.45235	3.45235	3.45235	3.45235	3.45235	3.45235	3.45235	3.45235	3.45235	3.45235	3.45235
1157	-0.914417	-0.600949	-0.328421	0.199546	0.558793	0.948096	1.3335	1.61572	1.85306	1.97388	2.0873	2.15971	2.20619	2.27856	2.41612	2.51144	2.6671	2.7781	2.87323	2.95077	3.03291	3.11034	3.18623	3.3141	3.35323	3.63476	3.70055	3.77326	3.77389	3.82341	3.83051	3.83674	4.00464	4.00464	4.00464	4.00464	4.00464	4.00464	4.00464	4.00464	4.00464
1158	-1.48921	-0.44582	0.529992	0.815614	1.06805	1.29597	1.49657	1.69181	1.87305	2.05453	2.29275	2.48327	2.60801	2.72229	2.82664	2.97074	3.08257	3.18919	3.27503	3.3333	3.37849	3.50565	3.53843	3.55418	3.56987	3.59306	3.62003	3.64868	3.69795	3.71191	3.74117	3.74117	3.74117	3.74117	3.74117	3.74117	3.74117	3.74117	3.74117	3.74117	3.74117
1159	0.453072	0.766391	1.03273	1.27447	1.54122	1.91602	2.13187	2.2688	2.51677	2.65179	2.81129	2.95628	3.20048	3.36405	3.46027	3.55042	3.59527	3.75112	3.80021	3.80021	3.80021	3.80021	3.80021	3.80021	3.80021	3.80021	3.80021	3.80021	3.80021	3.80021	3.80021	3.80021	3.80021	3.80021	3.80021	3.80021	3.80021	3.80021	3.80021	3.80021	3.80021
1160	0.151933	0.447399	0.719656	0.933338	1.12738	1.44673	1.6884	1.81511	2.01181	2.16111	2.35952	2.56127	2.69073	2.86779	2.95068	3.04907	3.17337	3.28036	3.3446	3.54759	3.5772	3.68387	3.71022	3.76836	3.7944	3.87612	3.87612	3.87612	3.87612	3.87612	3.87612	3.87612	3.87612	3.87612	3.87612	3.87612	3.87612	3.87612	3.87612	3.87612	3.87612
1161	0.0460489	0.478057	0.828157	1.20352	1.5105	1.79176	2.0529	2.30359	2.53979	2.69209	2.81861	2.92571	3.0503	3.13695	3.25118	3.38818	3.57067	3.60226	3.70203	3.98463	4.03806	4.0595	4.07879	4.11137	4.12637	4.12637	4.12637	4.12637	4.12637	4.12637	4.12637	4.12637	4.12637	4.12637	4.12637	4.12637	4.12637	4.12637	4.12637	4.12637	4.12637
1162	-1.18736	-0.072214	0.30422	0.684782	1.0112	1.32769	1.62586	1.91034	2.12464	2.3113	2.4725	2.69605	2.8969	3.08969	3.27774	3.37824	3.49238	3.55862	3.62853	3.70177	3.71776	3.79412	3.79412	3.79412	3.79412	3.79412	3.79412	3.79412	3.79412	3.79412	3.79412	3.79412	3.79412	3.79412	3.79412	3.79412	3.79412	3.79412	3.79412	3.79412	3.79412
1163	-1.14683	-0.23254	0.470961	0.891303	1.25816	1.55983	1.70144	1.8692	2.02689	2.16897	2.29058	2.37972	2.49212	2.65426	2.73836	2.80696	2.95099	3.01263	3.10286	3.17097	3.23543	3.3503	3.43769	3.5575	3.62051	3.69779	3.77557	3.81656	3.81656	3.81656	3.81656	3.81656	3.81656	3.81656	3.81656	3.81656	3.81656	3.81656	3.81656	3.81656	3.81656
1164	-1.50725	0.351507	0.589715	0.81353	0.996308	1.19863	1.37184	1.50974	1.68471	1.84044	2.06646	2.19388	2.33681	2.45516	2.57961	2.7131	2.84796	2.92931	3.03048	3.10483	3.23488	3.33128	3.35836	3.41222	3.42884	3.43085	3.43085	3.43085	3.43085	3.43085	3.43085	3.43085	3.43085	3.43085	3.43085	3.43085	3.43085	3.43085	3.43085	3.43085	3.43085
1165	-1.55187	0.0302858	0.391269	0.666205	0.899779	1.12646	1.43485	1.62567	1.79955	1.94656	2.14286	2.25429	2.33777	2.47911	2.58127	2.72785	2.77299	2.87194	2.99494	3.0936	3.20994	3.30413	3.35479	3.43129	3.4687	3.51958	3.55081	3.5953	3.5953	3.5953	3.5953	3.5953	3.5953	3.5953	3.5953	3.5953	3.5953	3.5953	3.5953	3.5953	3.5953
1166	-0.401666	0.534027	0.81631	1.07607	1.32521	1.54376	1.78795	1.982	2.13245	2.28554	2.42627	2.596	2.74798	2.85874	2.96515	3.05184	3.11948	3.16552	3.2148	3.41527	3.44964	3.52572	3.58595	3.60492	3.67853	3.75377	3.78092	3.85043	3.99548	4.05403	4.06559	4.06559	4.06559	4.06559	4.06559	4.06559	4.06559	4.06559	4.06559	4.06559	4.06559
1167	0.738002	1.02262	1.28193	1.49576	1.67169	1.83924	1.99992	2.13711	2.24517	2.38221	2.56775	2.68211	2.7666	2.88707	2.975	3.14527	3.2235	3.27701	3.323	3.34607	3.43556	3.47741	3.53741	3.54611	3.54611	3.54611	3.54611	3.54611	3.54611	3.54611	3.54611	3.54611	3.54611	3.54611	3.54611	3.54611	3.54611	3.54611	3.54611	3.54611	3.54611
1168	-0.963567	0.526937	0.876686	1.15048	1.49026	1.76177	2.00937	2.31131	2.49859	2.63966	2.76659	2.93195	3.00714	3.15515	3.24091	3.30251	3.36582	3.41999	3.55781	3.60413	3.60985	3.64532	3.66963	3.70087	3.77436	3.83936	3.87825	3.89842	3.95571	3.95571	3.95571	3.95571	3.95571	3.95571	3.95571	3.95571	3.95571	3.95571	3.95571	3.95571	3.95571
1169	-1.57391	-0.741824	-0.208971	0.419658	0.772365	1.0634	1.25621	1.42104	1.57478	1.71215	1.91447	2.05727	2.15303	2.22334	2.30137	2.40144	2.61053	2.93267	3.04514	3.13294	3.22088	3.29612	3.37129	3.51363	3.57739	3.59651	3.61414	3.63378	3.66873	3.69263	3.81147	3.85159	3.85159	3.85159	3.85159	3.85159	3.85159	3.85159	3.85159	3.85159	3.85159
1170	0.640135	0.933374	1.15019	1.35218	1.51272	1.81712	2.0238	2.18147	2.32211	2.46701	2.63562	2.92078	3.07316	3.22744	3.36171	3.5881	3.80132	3.95682	4.0532	4.08979	4.10512	4.10904	4.13183	4.13183	4.13183	4.13183	4.13183	4.13183	4.13183	4.13183	4.13183	4.13183	4.13183	4.13183	4.13183	4.13183	4.13183	4.13183	4.13183	4.13183	4.13183
1171	-1.46231	0.141902	0.596973	0.924895	1.2427	1.45808	1.63972	1.78686	2.09988	2.21265	2.34722	2.47926	2.57838	2.67937	2.74915	2.83559	2.9013	2.93776	3.02237	3.08919	3.10183	3.11762	3.14935	3.1609	3.18638	3.24161	3.29514	3.47515	3.57797	3.62228	3.65363	3.77158	3.77158	3.77158	3.77158	3.77158	3.77158	3.77158	3.77158	3.77158	3.77158
1172	-0.714177	0.308934	0.942071	1.40384	1.61399	1.81069	2.02934	2.12914	2.28719	2.44104	2.53951	2.62548	2.67821	2.80521	2.90245	3.09612	3.14319	3.1883	3.23969	3.28964	3.31035	3.32413	3.34505	3.3566	3.43468	3.44247	3.5168	3.67806	3.82109	4.04108	4.06613	4.07524	4.08236	4.10044	4.10044	4.10044	4.10044	4.10044	4.10044	4.10044	4.10044
1173	-1.14977	0.0163948	0.259071	0.377804	0.465243	0.60122	0.74677	0.949325	1.13277	1.44504	1.60847	1.72296	1.81968	1.93018	2.02036	2.15039	2.47137	2.58404	2.66522	2.69867	2.77474	2.97434	3.08222	3.23113	3.31427	3.37171	3.40885	3.47585	3.542	3.59542	3.59542	3.59542	3.59542	3.59542	3.59542	3.59542	3.59542	3.59542	3.59542	3.59542	3.59542
1174	-1.02987	0.381188	0.822935	1.03057	1.25572	1.42988	1.6236	1.79865	1.97104	2.17913	2.32888	2.46127	2.83538	2.95906	3.06258	3.2044	3.39725	3.46959	3.54793	3.6717	3.73122	3.77492	3.79307	3.80126	3.82346	3.84572	3.84572	3.84572	3.84572	3.84572	3.84572	3.84572	3.84572	3.84572	3.84572	3.84572	3.84572	3.84572	3.84572	3.84572	3.84572
1175	-1.4788	0.539465	0.815178	1.07633	1.36643	1.58937	1.76835	1.89059	2.01729	2.11247	2.212	2.31871	2.42684	2.5332	2.65998	2.78146	2.84951	2.91297	3.02865	3.19477	3.29076	3.41633	3.48481	3.54237	3.64473	3.70935	3.74515	3.80258	3.80258	3.80258	3.80258	3.80258	3.80258	3.80258	3.80258	3.80258	3.80258	3.80258	3.80258	3.80258	3.80258
1176	0.122659	0.634136	1.04709	1.3575	1.54868	1.73523	1.88572	2.01923	2.14807	2.25891	2.3865	2.47677	2.66688	2.78785	2.87999	2.96299	3.00179	3.11033	3.18292	3.21611	3.24466	3.34477	3.39977	3.40091	3.47659	3.47659	3.47659	3.47659	3.47659	3.47659	3.47659	3.47659	3.47659	3.47659	3.47659	3.47659	3.47659	3.47659	3.47659	3.47659	3.47659
1177	-1.24814	0.0874916	0.3101	0.563803	0.841167	0.972018	1.38385	1.68135	2.00129	2.1598	2.30518	2.41073	2.51763	2.60154	2.69259	2.83941	2.89837	2.94615	3.00511	3.16823	3.31798	3.44343	3.52481	3.5994	3.63313	3.6583	3.70786	3.75684	3.88339	3.90941	3.95193	3.9893	4.07696	4.13614	4.2257	4.29522	4.35916	4.38215	4.40148	4.4307	4.61678
1178	-1.03562	0.43994	0.667598	0.834788	0.999775	1.16042	1.35874	1.50029	1.63167	1.83736	1.96283	2.09203	2.22438	2.35401	2.4895	2.70859	2.86037	2.98889	3.1067	3.21678	3.32193	3.41205	3.48612	3.63379	3.68793	3.85647	3.89661	3.94643	4.01129	4.02483	4.05805	4.05805	4.05805	4.05805	4.05805	4.05805	4.05805	4.05805	4.05805	4.05805	4.05805
1179	-0.704408	-0.133538	0.318084	0.651333	0.946619	1.17712	1.37676	1.54741	1.73274	1.88245	2.03216	2.26269	2.43643	2.56275	2.78982	2.93455	2.98022	3.05094	3.1197	3.2067	3.28124	3.41277	3.52657	3.54768	3.6118	3.67214	3.71	3.73321	3.73321	3.73321	3.73321	3.73321	3.73321	3.73321	3.73321	3.73321	3.73321	3.73321	3.73321	3.73321	3.73321
1180	-0.346513	0.434068	0.636671	0.799424	0.938491	1.04276	1.204	1.3072	1.53554	1.72277	1.95219	2.06618	2.16461	2.32593	2.45275	2.57422	2.65144	2.81448	2.90469	3.14763	3.31604	3.39297	3.45322	3.59814	3.6733	3.71991	3.7531	3.78395	3.7863	3.84663	3.87623	3.90129	3.91553	3.92277	3.92749	3.92985	3.93518	3.93518	3.93518	3.93518	3.93518
1181	-1.23285	-0.585603	-0.0684563	0.352181	0.655641	0.915713	1.10498	1.28566	1.481	1.67131	1.81261	1.96582	2.11703	2.31647	2.40994	2.53031	2.74763	2.87689	2.96743	3.06933	3.15841	3.21885	3.26067	3.26067	3.26067	3.26067	3.26067	3.26067	3.26067	3.26067	3.26067	3.26067	3.26067	3.26067	3.26067	3.26067	3.26067	3.26067	3.26067	3.26067	3.26067
1182	-1.28725	0.581684	0.803141	1.00637	1.25457	1.55109	1.70239	1.82729	1.95228	2.07034	2.22802	2.34202	2.45323	2.53924	2.62552	2.70809	2.77287	2.89442	2.97583	3.07586	3.23521	3.31748	3.36803	3.38471	3.46492	3.60798	3.60798	3.60798	3.60798	3.60798	3.60798	3.60798	3.60798	3.60798	3.60798	3.60798	3.60798	3.60798	3.60798	3.60798	3.60798
1183	-1.3275	1.30789	1.54762	1.74489	1.96928	2.13352	2.27073	2.40799	2.54048	2.66421	2.75029	2.92194	3.02005	3.09575	3.16817	3.21531	3.25325	3.48014	3.51778	3.51908	3.54973	3.61237	3.64977	3.67385	3.67385	3.67385	3.67385	3.67385	3.67385	3.67385	3.67385	3.67385	3.67385	3.67385	3.67385	3.67385	3.67385	3.67385	3.67385	3.67385	3.67385
1184	0.477616	0.816793	1.23521	1.47232	1.68435	1.92322	2.11513	2.24705	2.40831	2.56518	2.85435	3.02429	3.26068	3.44776	3.70561	3.87596	4.07138	4.15906	4.23464	4.32464	4.44472	4.50439	4.55587	4.59813	4.67353	4.718	4.718	4.718	4.718	4.718	4.718	4.718	4.718	4.718	4.718	4.718	4.718	4.718	4.718	4.718	4.718
1185	-1.46864	-0.828747	-0.023917	0.501907	0.77594	0.962746	1.26625	1.45595	1.63962	1.79584	1.98595	2.18028	2.30852	2.48927	2.60228	2.84571	2.94582	3.03305	3.16189	3.28505	3.36153	3.42709	3.47311	3.52409	3.57818	3.6288	3.68437	3.81052	3.86296	3.91262	3.95844	3.98858	3.98858	3.98858	3.98858	3.98858	3.98858	3.98858	3.98858	3.98858	3.98858
1186	-0.892173	-0.304546	0.180466	0.548888	0.834439	1.04725	1.17983	1.36524	1.47748	1.69656	1.83368	1.91444	2.03427	2.32393	2.41207	2.48726	2.61257	2.7047	2.83157	2.89027	2.92967	2.99992	3.04267	3.17287	3.2335	3.2605	3.71207	3.83935	3.93339	4.00106	4.01883	4.04684	4.04684	4.04684	4.04684	4.04684	4.04684	4.04684	4.04684	4.04684	4.04684
1187	-1.6643	-0.868721	-0.471666	-0.28333	-0.0598981	0.0581219	0.183052	0.2869	0.335623	0.416556	1.64074	1.94889	2.20751	2.46062	2.75128	2.99845	3.17513	3.26931	3.35524	3.51873	3.59694	3.6777	3.73538	3.79441	3.8331	3.87661	3.96283	3.98213	4.04776	4.05836	4.09554	4.09554	4.09554	4.09554	4.09554	4.09554	4.09554	4.09554	4.09554	4.09554	4.09554
1188	-1.23137	-0.286647	0.192575	0.48886	0.964651	1.22491	1.42454	1.56784	1.74109	1.89049	2.03824	2.1975	2.35829	2.48183	2.63124	2.79355	2.95188	3.03022	3.13434	3.20381	3.27044	3.39692	3.51166	3.59139	3.60162	3.72854	3.75332	3.76308	3.81189	3.81788	3.81788	3.81788	3.81788	3.81788	3.81788	3.81788	3.81788	3.81788	3.81788	3.81788	3.81788
[truncated: 3,811 more rows]
